# Supplementary material for: Co-expression networks reveal the tissue-specific regulation of transcription and splicing
Source: Genome Res. 2017 Nov;27(11):1843–58. doi: 10.1101/gr.216721.116 (PMC5668942; doi:10.1101/gr.216721.116)
Supplement: Supplemental Material [file supp_gr.216721.116_Supplemental_Data_S1.xlsx]

## Sheet: readme
	This file contains transcriptome-wide networks for 16 tissues.
	Fields:
	Name1 and Name2: Node names (HGNC gene symbol or Ensembl transcript id)
	Edge Type: 0 (TE-TE), 1(TE-IR), 2(IR-IR)
	Edge Weight: weight of edge (element in the precision matrix)

## Sheet: Adipose − Subcutaneous
Name1	Name2	Edge type	Edge weight
A2M	CYYR1	1	-0.0216902101583076
A2M	ELTD1	1	-0.0900086901225977
A2M	ESAM	1	-0.0181848458622627
A2M	IGFBP2	1	-0.0490995678706222
A2M	NOTCH3	1	-0.0144656402229667
A2M	SPARCL1	1	-0.0891236043069301
AAAS	ZMAT1	1	-0.0157175409836467
AARS	ALDH1L2	1	-0.0520993367314908
AARS	ATF5	1	-0.0165466161193689
AARS	GARS	1	-0.0572927600214529
AARS	IARS	1	-0.153435894837153
AARS	MARS	1	-0.0085007278093902
AARS	YARS	1	-0.189098476581685
AATK	B4GALNT1	1	-0.0233324863319644
AATK	BCAS1	1	-0.0306032624720482
AATK	BRSK2	1	-0.0178429840087045
AATK	CMTM5	1	-0.0467200500649375
AATK	COL9A3	1	-0.0544644400250604
AATK	DRP2	1	-0.101991188532712
AATK	EMILIN3	1	-0.00685881344199034
AATK	FAM101A	1	-0.0696240408821189
AATK	FOXD3	1	-0.16116129138832502
AATK	GAL3ST1	1	-0.0410646131986906
AATK	GFRA3	1	-0.10504946666796301
AATK	GRIK3	1	-0.0608440956705579
AATK	KIF19	1	-0.0861640837876374
AATK	LCNL1	1	-0.00285998774937259
AATK	MAL	1	-0.0506682043421076
AATK	MPZ	1	-0.148114593113669
AATK	NCAM1	1	-0.0342779343070192
AATK	NKAIN4	1	-0.0295083511182898
AATK	NLGN3	1	-0.008991207439805141
AATK	PAQR6	1	-0.0237267784011146
AATK	PLP1	1	-0.0477135333756484
AATK	PMP2	1	-0.0801438053823589
AATK	SCN7A	1	-0.0382530158080019
AATK	SFRP5	1	-0.11149677111325201
AATK	SORCS1	1	-0.0223669813840881
AATK	SOX10	1	-0.0806724287913406
AATK	SOX8	1	-0.0433042311796158
AATK	TMOD2	1	-0.0103010877766773
AATK	TMPRSS5	1	-0.0216839700233208
ABAT	BCAT2	1	-0.10690755443616601
ABAT	GCDH	1	-0.0253959602797209
ABAT	IZUMO4	1	-0.0446996690473627
ABAT	PCYT2	1	-0.00257876105512035
ABAT	SPHK2	1	-0.0196878540896237
ABAT	SUN2	1	-0.00865878245542917
ABCA1	MYLIP	1	-0.03070425953086
ABCA1	SREBF2	1	0.0172450227298043
ABCA3	ABHD5	1	-0.000244247392842971
ABCA3	C19orf80	1	0.02764792596455
ABCA4	TFF3	1	-0.0561056676125936
ABCA5	ECHDC2	1	-0.022826564689147
ABCA5	MON2	1	-0.0209273412844682
ABCA6	ABCA8	1	-0.10967756578793698
ABCA6	CBLB	1	-0.0416466361639387
ABCA6	CCDC39	1	-0.0301988187937164
ABCA6	STK38	1	-0.14231707938691399
ABCA7	MFSD3	1	-0.017375240724494
ABCA8	ADD3	1	-0.0697529161194675
ABCA8	AUTS2	1	-0.010314802999649
ABCA8	CAV1	1	0.0551425644872949
ABCA8	CBX4	1	0.0045592936443482205
ABCA8	EPB41L2	1	-0.0942737233033806
ABCA8	LYVE1	1	-0.0156621082857984
ABCA8	NOVA1	1	-0.0850148710412608
ABCA8	PDGFRL	1	-0.0788567590742475
ABCA8	RGL1	1	-0.0630072899595951
ABCA8	RGMA	1	-0.007808727206902759
ABCB1	CDH24	1	-0.0214426507199661
ABCB1	LAMA3	1	-0.00899409488620494
ABCB1	MAML2	1	-0.00880250553622019
ABCB1	RUNDC3B	1	-0.289794544094411
ABCB1	SLC9A3R2	1	-0.0416689914399423
ABCB1	ST6GALNAC1	1	-0.0492916621455231
ABCB1	TRAK1	1	-6.20353758586569e-05
ABCB11	FGF10	1	-0.0282647988324339
ABCB6	SDC3	1	0.0601578165627464
ABCC1	ABHD5	1	0.0408006020712765
ABCC1	ADCY7	1	-0.00022600981737610498
ABCC1	ANGPTL5	1	-0.0174132995831044
ABCC1	CD34	1	-0.00266460877240677
ABCC1	CILP	1	-0.0543796116512113
ABCC1	CORO2B	1	-0.0354695915678224
ABCC1	DCN	1	-0.0867668339879678
ABCC1	ETFA	1	0.00351764584975173
ABCC1	FAM180B	1	-0.111324592879753
ABCC1	FBLN2	1	-0.166424039515111
ABCC1	FBXL7	1	-0.0045518557744920205
ABCC1	OMD	1	-0.0232376583891178
ABCC1	PCED1B	1	0.0135513509519501
ABCC1	PDE1B	1	0.0319792383653797
ABCC1	SERPINA5	1	-0.0299730232840509
ABCC1	STXBP6	1	-0.00146821834733887
ABCC1	ZFHX3	1	-0.00922558294385209
ABCC2	CUTC	1	-0.25592806082199304
ABCC3	CSN1S1	1	-0.0311015759970483
ABCC3	FADS3	1	-2.1924568752051998e-05
ABCC3	MSC	1	-0.0398171004553471
ABCC4	RAMP3	1	-0.12033970304654902
ABCC4	SELP	1	-0.0298434480069902
ABCC4	SLCO2A1	1	-0.00591926564242125
ABCC4	THSD7A	1	-0.0020315216967101398
ABCC5	NDUFA4L2	1	0.031170802975436004
ABCD2	ACSL1	1	-0.0295782958204339
ABCD2	APBB1IP	1	-0.0531544634933215
ABCD2	AR	1	-0.00259769567045669
ABCD2	ARHGAP20	1	-0.0578748262316411
ABCD2	C19orf80	1	-0.0134231598496583
ABCD2	CDO1	1	-0.0251763616849401
ABCD2	DCXR	1	-0.0355047737488868
ABCD2	DGAT1	1	-0.0867472165392066
ABCD2	EHBP1	1	-0.0312019157678226
ABCD2	ELOVL5	1	-0.0334332499106648
ABCD2	FAM166B	1	-0.116795890077048
ABCD2	GPAM	1	-0.0323184681809907
ABCD2	GYS2	1	-0.0226911940583761
ABCD2	HRSP12	1	-0.0158166722139047
ABCD2	IZUMO4	1	-0.0508725941368795
ABCD2	KLHL31	1	-0.15436764798374403
ABCD2	SLC16A7	1	-0.0108074266518056
ABCD2	SLC7A6	1	-0.0039537363071906395
ABCD2	SPHK2	1	-0.0163652390634489
ABCD2	SREBF1	1	-0.00164442847920005
ABCD2	THRSP	1	-0.0629835947535762
ABCD4	ADM5	1	-0.0413222045909307
ABCD4	CPLX1	1	-0.0017191202169623099
ABCD4	DARC	1	-0.0609662759242746
ABCD4	GPR68	1	-0.13927441054753698
ABCD4	RALGDS	1	-0.008128750411934579
ABCD4	RELL1	1	-0.094580152852141
ABCD4	SH2B2	1	-0.0057074492929813396
ABCD4	SNTG2	1	-0.00607362846475006
ABCD4	TCTEX1D1	1	-0.0587134666791474
ABCD4	TMEM255B	1	-0.0244643702058576
ABCD4	ZNF385D	1	-0.0231200570319274
ABCG1	CDC42EP3	1	-0.0107785495340327
ABCG1	CETP	1	-0.0239460707712487
ABCG1	MECOM	1	-0.0625699462442052
ABCG1	MLLT4	1	-0.00177443370635528
ABCG1	MYLIP	1	-0.176041187589765
ABCG1	SREBF1	1	-0.0464394779788384
ABCG2	CRIM1	1	-0.0249675195352781
ABCG2	LRCH1	1	-0.0340845155746066
ABCG2	MYRIP	1	-0.137580487456016
ABCG2	ST6GAL1	1	-0.11443657946046401
ABCG2	STARD3	1	-0.0177606320315866
ABHD14A	TENC1	1	-0.0033186171006171898
ABHD17C	KIAA1199	1	-0.0165172118157666
ABHD5	ANKRD53	1	-0.164869302939036
ABHD5	BZW2	1	-0.0107949556899068
ABHD5	C19orf80	1	0.10668988829655301
ABHD5	CENPV	1	-0.0042779624528572
ABHD5	CRLS1	1	-0.128529196185502
ABHD5	EGFLAM	1	-0.0009538944253287551
ABHD5	EPB41L4B	1	-0.163628185589311
ABHD5	EPHX1	1	0.0447219259432811
ABHD5	FABP4	1	-0.148893061214193
ABHD5	FAM166B	1	0.0563249507928446
ABHD5	FNDC4	1	-0.0191378209061583
ABHD5	GNAI1	1	-0.0519408909435385
ABHD5	GPAM	1	0.0273891141790193
ABHD5	HSDL2	1	-0.0296842135802035
ABHD5	IFNGR2	1	-0.202127986527455
ABHD5	IRS2	1	-0.006242228991325379
ABHD5	KIAA1239	1	-0.00584067790084599
ABHD5	KIFC3	1	-0.027129950071744003
ABHD5	LNPEP	1	-0.0210787200901009
ABHD5	MAN2A2	1	-0.0288479333090291
ABHD5	MAP3K5	1	-0.127372364056831
ABHD5	MCM6	1	-0.014867482672235
ABHD5	MMD	1	-0.0111233974540436
ABHD5	MRPL46	1	-0.0193753865493095
ABHD5	NEDD4L	1	-0.0345179883896223
ABHD5	ORMDL3	1	-0.0125822902249591
ABHD5	PCED1B	1	-0.0211188706826779
ABHD5	PDE1B	1	-0.0692003587301178
ABHD5	PDK4	1	-0.0844326960995316
ABHD5	PJA1	1	-0.0025551432120554103
ABHD5	PLXNB3	1	-0.048461238682520995
ABHD5	PTGER3	1	-0.00505009632981555
ABHD5	RASSF4	1	0.0096643421801829
ABHD5	RHOBTB1	1	-0.0010107313176308198
ABHD5	SDC3	1	-0.0108400662636092
ABHD5	SERPINA5	1	0.0126860392182253
ABHD5	TNIP1	1	0.0530676993226881
ABHD5	TSPAN15	1	-0.00286158274738617
ABHD5	ZDHHC18	1	-0.008696689314424941
ABHD6	BMP6	1	-0.0260649142198188
ABHD6	CCRL2	1	-0.0471687987559663
ABHD6	FAM117A	1	-0.0055018355079959605
ABHD6	MEOX2	1	-0.0637579715590211
ABHD6	SDPR	1	-0.011461369692511998
ABHD6	SGK223	1	-9.05484040145711e-05
ABHD6	SIK1	1	-0.0152597372567546
ABHD6	TMCC3	1	-0.00970638193740807
ABHD6	ZBTB18	1	-0.00698203541729873
ABHD8	MAPK13	1	-0.00400388041901444
ABI3	AVPR2	1	-0.0692337687121362
ABI3	CCM2L	1	-0.0064787568630965105
ABI3	CCND3	1	-0.00666641151855043
ABI3	CD74	1	-0.0018991553524979699
ABI3	ELK3	1	-0.0823121906647132
ABI3	ETS2	1	-0.0101271977108306
ABI3	GRASP	1	-0.0303301135116542
ABI3	HLA-DRA	1	-0.00015896977910193202
ABI3	HYAL2	1	-0.13673452034915498
ABI3	JAG2	1	-0.0134550605767781
ABI3	RASIP1	1	-0.0208506438092941
ABI3	SH2D3C	1	-0.0129540358275371
ABI3	SLC9A3R2	1	-0.0284494400576339
ABI3	WNK1	1	-0.00556188405494628
ABI3BP	ANGPTL5	1	-0.00256902054068927
ABI3BP	COL14A1	1	-0.030355121555874
ABI3BP	COL6A3	1	-0.0398831523135875
ABI3BP	DCN	1	-0.0743209526672766
ABI3BP	ECM1	1	-0.0362505243619282
ABI3BP	FBN1	1	-0.03312784041546
ABI3BP	GALNT13	1	-0.0683552403634243
ABI3BP	GFPT2	1	-0.0711168557086983
ABI3BP	ITGA11	1	-0.0158035827488005
ABI3BP	MRC2	1	-0.0426056123746989
ABI3BP	PAM	1	-0.00628480697404121
ABI3BP	PCOLCE2	1	-0.0210480148297204
ABI3BP	SFRP4	1	-0.0617095411594826
ABI3BP	VCAN	1	-0.0436548059942103
ABL1	ACKR3	1	-0.0136034036351313
ABL1	ADAMTS5	1	-0.00423663898327974
ABL1	GFPT2	1	-0.0209042445864366
ABL1	MEDAG	1	-0.0544475230257418
ABL1	SNX21	1	-0.0900483171633198
ABLIM1	DPYSL2	1	-0.0348794083682519
ABLIM1	MCF2L	1	-0.0742657628084828
ABLIM2	AGFG2	1	-0.047997010013503
ABLIM2	EFNA1	1	-0.0174420018466042
ABLIM2	FBXO31	1	-0.0181417763284902
ABLIM2	MECOM	1	-0.0136283109387574
ABLIM2	NAGS	1	-0.0407595426864874
ABLIM2	PDIA5	1	-0.0240156302554588
ABLIM2	SCN1B	1	-0.00659112003910659
ABLIM2	SH3TC1	1	-0.054258248935204
ABLIM3	CA4	1	-0.00887621610554275
ABLIM3	CTNNBIP1	1	-0.0609385543655791
ABLIM3	KIAA1217	1	-0.0527804979572483
ABLIM3	MCF2L	1	-0.0681394020956822
ABLIM3	PDE2A	1	-0.106748989815618
ABLIM3	SCNN1B	1	-0.0177453117514596
ABLIM3	SHANK3	1	-0.0175620329545655
ABLIM3	ST6GALNAC3	1	-0.018625220705841997
ABLIM3	TNN	1	-0.0179373857435249
ABLIM3	USP13	1	-0.0520850753283949
ABRACL	LYN	1	-0.0235902635552334
AC131097.4	GREB1L	1	-0.0147990107851719
AC131097.4	IP6K3	1	-0.0129122285498363
AC131097.4	KDM6A	1	0.0254890966937389
ACACA	ACLY	1	-0.20281506445573397
ACACA	ADIPOR2	1	-0.18311143368819102
ACACA	ADORA1	1	-0.0721637249714249
ACACA	CYP4F22	1	-0.00554986835945919
ACACA	FAM134B	1	-0.0424433877297835
ACACA	GPAM	1	-0.0680536596887931
ACACA	INSIG1	1	-0.12938735377161698
ACACA	KCNE1	1	-0.009943435854707229
ACACA	ME1	1	-0.22915125811358103
ACACA	MID1IP1	1	-0.0011261792638280002
ACACA	MME	1	-0.0184890382348911
ACACA	MMP17	1	-0.0152163904019456
ACACA	OLFM2	1	-0.0275466174953571
ACACA	PCYT2	1	-0.0025135953032128697
ACACA	POLD2	1	-0.0127820371559084
ACACA	PRRT4	1	-0.055423622095285
ACACA	SREBF1	1	-0.0930784348784345
ACACA	TF	1	-0.0594537817378671
ACACA	THRSP	1	-0.00521638465606929
ACAD11	CTIF	1	-0.0211900332345789
ACAD11	LSMEM1	1	-0.0145692170202798
ACAD11	PNISR	1	-0.034220249073194
ACAD11	RBM5	1	-0.00627217404151389
ACAD11	ROBO4	1	0.0107499306762981
ACAD11	ZNF692	1	-0.0552597416605015
ACADL	ALDH2	1	-0.0010013363463284401
ACADL	LRP1B	1	-0.0917845844393362
ACADL	MAOA	1	-0.0390349763264848
ACADM	PCCB	1	-0.00311585353063964
ACADS	HADH	1	-0.0722750056586051
ACADVL	ATP13A3	1	-0.0162531870015536
ACADVL	ECH1	1	-0.0196321043644586
ACADVL	FABP4	1	-0.172918722374863
ACADVL	MLLT1	1	0.0785514716791514
ACADVL	PDK4	1	-0.0223128729032736
ACADVL	SPOCD1	1	-0.0108251492263415
ACADVL	TMED5	1	-0.0575531475634943
ACAP1	CD3E	1	-0.00558761497888765
ACAP1	ZAP70	1	-0.0358531264727283
ACAP3	ADAM33	1	-0.00568039416320781
ACAP3	ANKRD13B	1	-0.007719177895269141
ACAP3	ARHGAP12	1	-0.0266716000617124
ACAP3	DBN1	1	-0.00199887968416707
ACAP3	EPS8L2	1	-0.0122248306470813
ACE2	ADRB1	1	-0.0624209711027905
ACE2	RGL3	1	-0.10945784585500698
ACKR3	CD70	1	-0.0708361893389084
ACKR3	CREB5	1	-0.0100213453248394
ACKR3	FGF16	1	-0.0483192537767627
ACKR3	GFPT2	1	-0.0834324083579321
ACKR3	GPR133	1	-0.10183592988275099
ACKR3	HAS1	1	-0.0446274466804494
ACKR3	HTRA3	1	-0.00389976968935911
ACKR3	IGFBP6	1	-0.016894672995505
ACKR3	MEDAG	1	-0.0140696767989502
ACKR3	NTN1	1	-0.0170817592540441
ACKR3	RGMA	1	-0.0107416596445483
ACKR3	SCARA5	1	-0.0508512725862487
ACKR3	SMAD3	1	-0.0316856772153254
ACKR3	VASN	1	-0.0129101474404905
ACLY	ACSS2	1	-0.0547565587905349
ACLY	ADIPOR2	1	-0.0523160923304983
ACLY	ADORA1	1	-0.0138036661432559
ACLY	C19orf80	1	-0.0550319799214254
ACLY	CLMN	1	-0.0633441587208028
ACLY	DLAT	1	-0.16618847486726698
ACLY	EBP	1	-0.00680691090329479
ACLY	ELOVL5	1	-0.0255273085383525
ACLY	FADS2	1	-0.0109873666228957
ACLY	HES6	1	-0.048204291991074004
ACLY	INSIG1	1	-0.11356802170582199
ACLY	ME1	1	-0.18923275020720198
ACLY	MID1IP1	1	-0.00158898106241929
ACLY	MMP17	1	-0.0566199910675417
ACLY	MVD	1	-0.19113962768858203
ACLY	NSDHL	1	-0.0634530565790391
ACLY	OLFM2	1	-0.0739256283076787
ACLY	PRRT4	1	-0.015198726279007
ACLY	THRSP	1	-0.0399183159872636
ACOX2	PNISR	1	-0.0117698779358142
ACOX2	STK36	1	-0.0475100571608329
ACP5	C1R	1	0.02231203771298
ACP5	CAPG	1	-0.0162600870211954
ACP5	CCDC88A	1	-0.0315841608978225
ACP5	CD52	1	-0.0592373236354894
ACP5	CHIT1	1	-0.0795161722088841
ACP5	DCSTAMP	1	-0.0674101659751016
ACP5	DNASE2B	1	-0.0390007238036479
ACP5	FBP1	1	-0.141318438077442
ACP5	GRN	1	-0.0682408989324919
ACP5	IFI30	1	-0.0451396670507007
ACP5	IGSF6	1	-0.100198007726449
ACP5	IQGAP2	1	-0.0617997374183349
ACP5	LIPA	1	-0.0548750834378654
ACP5	MPP1	1	-0.0379265001006754
ACP5	MSR1	1	-0.0215000695533826
ACP5	MYO9B	1	-0.007000068690229
ACP5	NPL	1	-0.011859593916332
ACP5	NRSN2	1	0.0352368156900772
ACP5	PLA2G7	1	-0.0756938822782737
ACP5	PLD3	1	-0.037982192934026
ACP5	SLC15A3	1	-0.0259811865541282
ACP5	TFEC	1	-0.0329888251630536
ACP5	TREM2	1	-0.133812710998897
ACP5	TREML1	1	-0.0253913123983675
ACP5	TYROBP	1	-0.017860332091271
ACPL2	TRIO	1	-0.0142738182738546
ACSF2	DBI	1	-0.011345825911996002
ACSF2	KRT79	1	-0.0236871484575424
ACSL1	ACSS2	1	-0.06388910327488401
ACSL1	AGPAT2	1	-0.133509678518437
ACSL1	CYB5A	1	-0.122288997961107
ACSL1	DGAT1	1	-0.0388688270773516
ACSL1	DGAT2	1	-0.0999178488615468
ACSL1	ECHS1	1	-0.0548186364871012
ACSL1	GPAM	1	-0.037131192491445995
ACSL1	LDHD	1	-0.0614818196844456
ACSL1	LGALS12	1	-0.0166676081991434
ACSL1	LPL	1	-0.114434155195846
ACSL1	MARC1	1	-0.07562041406360401
ACSL1	MESP1	1	-0.00223326270800111
ACSL1	NMB	1	-0.0187367706655136
ACSL1	PC	1	-0.0243867111513222
ACSL1	PRRT4	1	-0.080381654466151
ACSL1	RBP4	1	-0.00457539160019881
ACSL5	PLA1A	1	-0.0137005422031728
ACSS1	SVEP1	1	-0.0248036645580308
ACSS2	ADORA1	1	-0.179384026450878
ACSS2	AGPAT2	1	-0.016008036354139
ACSS2	AIF1L	1	0.0105859488585048
ACSS2	CYB5A	1	-0.0455230790407745
ACSS2	DGAT1	1	-0.0432367262622096
ACSS2	ELOVL5	1	-0.0774206386860512
ACSS2	GNAZ	1	0.0225875948119952
ACSS2	ME1	1	-0.0847614276554341
ACSS2	MID1IP1	1	-0.0414275589410562
ACSS2	PC	1	-0.0271457687832592
ACSS2	PCYT2	1	-0.0473369897871298
ACSS2	PPP1R16B	1	0.00403916786717962
ACSS2	SREBF1	1	-0.0533194792322917
ACSS2	THRSP	1	-0.0285490218762513
ACSS2	TKT	1	-0.0342239165622096
ACSS3	ACVR1C	1	-0.0627582629057383
ACSS3	ALDH1L1	1	-0.00521409576959611
ACSS3	APMAP	1	-0.107522596606318
ACSS3	CD52	1	0.0120035365620605
ACSS3	FPGS	1	-0.0583103827117223
ACSS3	GART	1	-0.0512498452025152
ACSS3	NCEH1	1	0.0276894101572511
ACSS3	NHLRC3	1	-0.109920379577481
ACSS3	OBSL1	1	-0.0249043777440326
ACSS3	PMM1	1	-0.0164545067449104
ACSS3	S100A4	1	0.0245236087519726
ACSS3	TM7SF2	1	-0.0829313150356889
ACSS3	TMEM42	1	-0.011356663117482001
ACSS3	TTC36	1	-0.0248188723067961
ACTA1	CKM	1	-0.24223133314044398
ACTA1	COX6A2	1	-0.0544323034586684
ACTA1	EEF1A2	1	-0.11268622369086599
ACTA1	KLHL41	1	-0.0499963683465718
ACTA1	MB	1	-0.105152872328535
ACTA1	MYBPC1	1	-0.0403617360042936
ACTA1	MYL1	1	-0.203340001640222
ACTA1	MYL2	1	-0.178557332889135
ACTA1	MYLPF	1	-0.022226825701049
ACTA1	TCAP	1	-0.0510014932507903
ACTA1	TNNC2	1	-0.0259947337805164
ACTA1	TNNI2	1	-0.00169875085699394
ACTA1	TRIM54	1	-0.0907769276151902
ACTC1	GABRA4	1	-0.00889224110138453
ACTC1	HSPB3	1	-0.0102215926978722
ACTC1	ITIH3	1	-0.0242850701645834
ACTC1	LTBP1	1	-0.00698490707962668
ACTC1	MYOZ1	1	-0.0107570442911643
ACTC1	P2RX1	1	-0.16527091064685
ACTC1	RYR2	1	-0.0304659046205207
ACTC1	TRIM54	1	-0.00202585806172958
ACTC1	WFDC1	1	-0.00233647350977731
ACTG2	ASB2	1	-0.012099311015126003
ACTG2	CNN1	1	-0.38917905592422203
ACTG2	CSRP1	1	-0.08867376178391
ACTG2	CYFIP2	1	-0.18765043743689605
ACTG2	DES	1	-0.246568367658557
ACTG2	HMCN2	1	-0.00313783039064935
ACTG2	ITGA8	1	-0.0253358490757785
ACTG2	MRVI1	1	-0.0327728666904254
ACTG2	MYH11	1	-0.197425250453022
ACTG2	PDLIM3	1	-0.10022445498637
ACTG2	PDLIM7	1	-0.0808511045639766
ACTG2	PRUNE2	1	-0.0997785291557474
ACTG2	RAB9B	1	-0.009104915018561859
ACTG2	RASL12	1	-0.0265762902005429
ACTG2	SLC8A1	1	-0.0267382506168032
ACTG2	TPM2	1	-0.0335547312861897
ACTG2	TSPAN2	1	-0.0104395361504718
ACTN2	ANKRD1	1	-0.007474150887198641
ACTN2	CKM	1	-0.0755074541807105
ACTN2	CMYA5	1	-0.00972009359168095
ACTN2	COX6A2	1	-0.0478364138420643
ACTN2	EEF1A2	1	-0.05298779272806
ACTN2	KLHL41	1	-0.00111848279082684
ACTN2	MB	1	-0.0833330006802102
ACTN2	MYL1	1	-0.0380800248312393
ACTN2	MYL2	1	-0.14363336377139402
ACTN2	TNNC1	1	-0.0530919654480421
ACVR1	AOC2	1	0.0224450409010664
ACVR1B	CLTCL1	1	-0.00512793909957551
ACVR1B	ELL	1	-0.0430711195856985
ACVR1B	ITPKC	1	-0.00668919504483397
ACVR1B	SBNO2	1	-0.0213491699488781
ACVR1B	TENC1	1	-0.0105362241203026
ACVR1B	ZNF436	1	-0.0040786350029734
ACVR1C	APMAP	1	-0.0653798447996325
ACVR1C	C20orf24	1	0.0062454126888502205
ACVR1C	C20orf27	1	-0.000394869266232811
ACVR1C	C6	1	-0.0765583513921228
ACVR1C	CCDC107	1	0.0216167837478523
ACVR1C	CEPT1	1	-0.0952545949914162
ACVR1C	CORO1C	1	0.0524744150939154
ACVR1C	CRLS1	1	-0.0197400555314124
ACVR1C	DENND2D	1	-0.0465615567579839
ACVR1C	DNAH9	1	-0.0359563534412372
ACVR1C	DRAM2	1	-0.0172653571841805
ACVR1C	EGFL6	1	0.0111276538694766
ACVR1C	EPB41L4B	1	-0.0400547332069143
ACVR1C	FAM198B	1	0.00450139019600746
ACVR1C	GAS2L1	1	0.0369085800926091
ACVR1C	GLIS1	1	-0.0458427684674801
ACVR1C	GPT2	1	-0.0977286242137288
ACVR1C	HADH	1	-0.0873129911317979
ACVR1C	IRS2	1	-0.0485720100890006
ACVR1C	LPL	1	-0.0159407967008618
ACVR1C	NAT8L	1	-0.00338120787065758
ACVR1C	ORMDL3	1	-0.20810736130248897
ACVR1C	PDE3B	1	-0.00400187914111968
ACVR1C	PPP1R1A	1	-0.00765956751164762
ACVR1C	PPP1R1B	1	-0.064106028788877
ACVR1C	PTPN3	1	-0.17335813885662002
ACVR1C	PTPRF	1	-0.0280434372628697
ACVR1C	SLC27A2	1	-0.0592509237380314
ACVR1C	TIMP3	1	0.00413000050384695
ACVR1C	TM7SF2	1	-0.0548470807577811
ACVR1C	TMEM132C	1	-0.0465107436817429
ACVR1C	TTC36	1	-0.0839876268868649
ACVR2A	ZFHX4	1	-0.0021213831985585603
ACY1	APMAP	1	-0.0626855925572074
ACY1	HSD17B10	1	-0.0028577046448825
ACY1	LDHD	1	-0.07445953258165598
ACY1	STK40	1	0.00785476544011149
ADA	CALHM2	1	-0.00897414073989977
ADA	CILP	1	-0.0343831016135587
ADA	DBN1	1	-0.0580004660746278
ADA	HTRA3	1	-0.0624364482071158
ADA	IGFBP6	1	-0.0407565226182492
ADA	KCNIP3	1	-0.0653886272151361
ADA	MMP27	1	-0.110539126765148
ADA	SNX21	1	-0.0216266894225497
ADA	TPST1	1	-0.0173582139171141
ADAD2	TAF1C	1	-0.143116591682041
ADAM12	C10orf90	1	-0.0063671105191657
ADAM12	ITGAM	1	0.011641614731632001
ADAM15	ADCY4	1	-0.0892350381991274
ADAM15	ATG9B	1	-0.0737736483340014
ADAM15	CRIP2	1	-0.0319515800532605
ADAM15	EFHD2	1	-0.0939244219583914
ADAM15	EPHB4	1	-0.0121881496699952
ADAM15	HEG1	1	-0.14180095557802802
ADAM15	HSPA12B	1	-0.109550084135767
ADAM15	HYAL2	1	-0.12117187422050599
ADAM15	JAG2	1	-0.0415166950466528
ADAM15	LCN10	1	-0.10338697149085302
ADAM15	NPDC1	1	-0.152697236967543
ADAM15	PKN3	1	-0.0409722220369691
ADAM15	RAMP2	1	-0.0468726427079877
ADAM15	SEMA3F	1	-0.0460165721884038
ADAM15	ST6GALNAC1	1	-0.150805373816983
ADAM15	TEK	1	-0.0585877117264876
ADAM15	THBD	1	-0.0795481612426469
ADAM15	TPO	1	-0.0448771140543623
ADAM23	KIF19	1	-0.0223993455999757
ADAM28	CD1D	1	-0.00231901480943132
ADAM33	COL16A1	1	-0.0824106102724256
ADAM33	DCLK1	1	-0.0389071385616998
ADAM33	ISLR	1	-0.0869551771507455
ADAM33	OLFML1	1	-0.0252942029324446
ADAM33	SCARA5	1	-0.0147626725768709
ADAM33	SPON2	1	-0.0109950253981946
ADAM8	C15orf48	1	-0.0812436995499447
ADAM9	ENO1	1	-0.0266174551196033
ADAMTS1	BTG2	1	-0.0764892066366343
ADAMTS1	C11orf96	1	-0.0125032953538903
ADAMTS1	CSRNP1	1	-0.0565292346417265
ADAMTS1	ETS2	1	-0.034780346052271004
ADAMTS1	FOSL2	1	-0.103713603893355
ADAMTS1	GRASP	1	-0.0320337998354311
ADAMTS1	HEYL	1	-0.0236149687887474
ADAMTS1	HYAL2	1	-0.0222639574890245
ADAMTS1	JUNB	1	-0.016456175356627
ADAMTS1	MYC	1	-0.081775481227647
ADAMTS1	NFIL3	1	-0.0272651441584694
ADAMTS1	NR4A3	1	-0.0134078273127963
ADAMTS1	RNF122	1	-0.0258576301943158
ADAMTS1	SSTR2	1	-0.0525802955762049
ADAMTS1	THBD	1	-0.00081163441185178
ADAMTS14	FAM101A	1	-0.0337362566051875
ADAMTS14	SORCS2	1	-0.0378527456043935
ADAMTS18	CA4	1	-0.0014233385877172
ADAMTS18	GJA5	1	-0.0204707276367612
ADAMTS18	GNAZ	1	-0.008159452756100341
ADAMTS18	IRF2BP2	1	0.0021413455379190602
ADAMTS2	ANPEP	1	-0.0305866836905684
ADAMTS2	CALU	1	-0.0171892308399499
ADAMTS2	COL5A1	1	-0.12709599458068102
ADAMTS2	COL5A2	1	-0.0261067575492607
ADAMTS2	MFGE8	1	-0.0282867000480146
ADAMTS2	ZEB1	1	-0.0247192309779001
ADAMTS3	BICC1	1	-0.00492391247725196
ADAMTS3	FBLN5	1	-0.0249298148452262
ADAMTS5	ADD3	1	-0.010573460325539
ADAMTS5	FBN1	1	-0.0882517722951526
ADAMTS5	PAMR1	1	-0.0131393167381192
ADAMTS5	SEMA3C	1	-0.091439091815134
ADAMTS5	UAP1	1	-0.0242811314065721
ADAMTS9	CCDC85A	1	0.0249114529739244
ADAMTS9	FAM212A	1	0.0278327725428001
ADAMTS9	HOXB7	1	0.0291307578204508
ADAMTS9	LRRC8A	1	0.0121079825168911
ADAMTS9	MINA	1	-0.0393408224936663
ADAMTS9	PDGFB	1	0.0228538469771324
ADAMTS9	PEAR1	1	0.0033672946367494603
ADAMTS9	RNF38	1	0.0149920076415855
ADAMTS9	SLC25A30	1	0.0347840008487079
ADAMTS9	SMAD1	1	0.0176340654005881
ADAMTS9	TMEM2	1	-0.101509038422342
ADAMTS9	TNFAIP1	1	-0.00457911617705238
ADAMTSL1	ALPK2	1	-0.0894749895179736
ADAMTSL1	GPC3	1	-0.027838651931497004
ADAMTSL1	SLIT3	1	-0.0158265348578739
ADAMTSL4	BMP1	1	-0.0843063753548503
ADAMTSL4	ESYT1	1	-0.0924404756436354
ADAMTSL4	FCHSD2	1	0.00503458506558671
ADAMTSL4	FGFR1	1	-0.016916351201001
ADAMTSL4	GABRE	1	-0.0399234398368903
ADAMTSL4	GALNT12	1	-0.00441963841684287
ADAMTSL4	GFPT2	1	-0.105859114251736
ADAMTSL4	GPR64	1	-0.10589126344582699
ADAMTSL4	HEMK1	1	-0.0382822262009464
ADAMTSL4	IRF4	1	-0.0665541090798024
ADAMTSL4	LOXL4	1	-0.00973157235218388
ADAMTSL4	MAP1A	1	-0.0374272496913242
ADAMTSL4	NOD1	1	-0.0113694245484535
ADAMTSL4	PCOLCE2	1	-0.0522428934599118
ADAMTSL4	PLAGL1	1	-0.116462749115365
ADAMTSL4	PTPRK	1	0.00163614715725643
ADAMTSL4	SIDT2	1	-0.0230830913957456
ADAP1	CD53	1	-0.0184789241391184
ADAP1	DOCK2	1	-0.0159284430205572
ADAP1	PIK3AP1	1	-0.041930562992856
ADAP1	PIK3R5	1	-0.07594029777407901
ADAP1	SNX20	1	-0.0177723682786993
ADAP1	SPI1	1	-0.0338538948476352
ADAP1	STXBP2	1	-0.0482304179119683
ADARB1	P2RX1	1	-0.0114098452722823
ADCK1	RABGGTA	1	-0.0357404804253389
ADCK4	SEMA4B	1	-0.0012755635997103699
ADCY3	ADRA2A	1	-0.0612574276036336
ADCY3	ANTXR2	1	-0.0604680886024328
ADCY3	CDC42EP4	1	-0.00290367204720986
ADCY3	CPSF4	1	-0.0337737148045218
ADCY3	EGFLAM	1	-0.0613928310560376
ADCY3	GBE1	1	0.0455890386799615
ADCY3	IGFBP4	1	-0.0830329271156304
ADCY3	KIRREL	1	-0.012390669934866
ADCY3	MGAT3	1	-0.071397360451713
ADCY3	NINJ2	1	-0.0535826816812186
ADCY3	PODN	1	-0.0215668257294681
ADCY3	SEPT4	1	-0.00111820451656827
ADCY3	SH3KBP1	1	-0.0374218355923907
ADCY3	VPS13D	1	-0.0790523725318335
ADCY3	YPEL5	1	-0.0301419620172277
ADCY4	ARHGAP31	1	-0.0370491041744347
ADCY4	CASKIN2	1	-0.007754241740366109
ADCY4	EPHB4	1	-0.0359927890072907
ADCY4	HEG1	1	-0.0361005849304514
ADCY4	JAG2	1	-0.0239416431889217
ADCY4	NOVA2	1	-0.0133496590915309
ADCY4	NPDC1	1	-0.0413468305408932
ADCY4	RAPGEF3	1	-0.0202400405583178
ADCY4	RIPK3	1	-0.0713364002054951
ADCY4	TEK	1	-0.0189382971502152
ADCY5	SORBS1	1	-0.099198133157559
ADCY7	DOK2	1	-0.00293396683188017
ADCY7	GFRA2	1	-0.0250989802297696
ADCY7	IL10RA	1	-0.025462668346055
ADCY7	ITGAM	1	-0.0906265961819562
ADCY9	HEG1	1	-0.0511125210899297
ADCY9	RAPGEF2	1	-0.0172279912324962
ADCY9	SCML1	1	0.0303604796838028
ADCY9	SH3BP4	1	-0.0245358667147365
ADCY9	ST3GAL2	1	-0.007129218917640909
ADD3	ARHGAP32	1	-0.0338133966505203
ADD3	AUTS2	1	-0.0176929420517507
ADD3	EPB41L2	1	-0.0176165702961193
ADD3	FAM19A5	1	-0.0833621262858102
ADD3	GAS1	1	-0.0217019522689154
ADD3	GLI3	1	-0.0685382812156233
ADD3	ITPR3	1	-0.030056120598552994
ADD3	LPAR1	1	-0.0323964412232324
ADD3	NHSL1	1	-0.0543354922205811
ADD3	SCARA5	1	-0.0266154105716212
ADD3	TRIO	1	-0.0992918488388034
ADHFE1	DCXR	1	-0.0635559958440849
ADHFE1	IZUMO4	1	-0.0638224638845673
ADHFE1	PDE2A	1	0.0095254217050833
ADHFE1	PTPRS	1	-0.0338253652509846
ADHFE1	PXMP2	1	-0.0329572577137858
ADIPOR2	ADORA1	1	-0.0210475936825974
ADIPOR2	DHCR7	1	-0.00232232933919051
ADIPOR2	GPAM	1	-0.0567190678094876
ADIPOR2	INSIG1	1	-0.00460905319616856
ADIPOR2	MAP2K6	1	-0.0179276652928241
ADIPOR2	ME1	1	-0.0496951735574699
ADIPOR2	MME	1	-0.0507554034665078
ADIPOR2	PPARG	1	-0.116874275890531
ADIPOR2	PRRT4	1	-0.0163420306138987
ADIPOR2	TKT	1	-0.00138457069272795
ADIRF	GPX4	1	-0.0291431818660558
ADIRF	LGALS1	1	-0.0467328924338279
ADIRF	SNCG	1	-0.00799749175636923
ADM	SVEP1	1	-0.09356897560558199
ADM5	CFI	1	-0.0958227826394442
ADM5	CMIP	1	-0.0129885734990624
ADM5	CPLX1	1	-0.0665980037382888
ADM5	CPXM2	1	-0.0397376565933099
ADM5	DARC	1	-0.117418840768684
ADM5	DUSP23	1	-0.0437762078372022
ADM5	EFNA1	1	-0.00960089986834634
ADM5	FAM110D	1	-0.00753560145608633
ADM5	GNA14	1	-0.0136728045167216
ADM5	GPR146	1	-0.0303519947966354
ADM5	GPR68	1	-0.052455204872616
ADM5	HAPLN3	1	-0.0038641874534579702
ADM5	HPN	1	-0.00520301396211168
ADM5	IFITM1	1	-0.202086361097708
ADM5	IGFBP4	1	-0.0172154993216772
ADM5	KLHL3	1	-0.0857848535571704
ADM5	MKL2	1	-0.0192938192809409
ADM5	MVP	1	-0.00371042932374291
ADM5	RELL1	1	-0.0605893161727152
ADM5	SEMA4B	1	-0.019120474956133
ADM5	SH2B2	1	-0.0156729532779182
ADM5	SNTG2	1	-0.0211267058794311
ADM5	SPNS2	1	-0.0609350722593363
ADM5	SULF2	1	-0.19079953719822398
ADM5	TACR1	1	-0.050656571635178005
ADM5	TESC	1	-0.0151875597030081
ADM5	THSD7A	1	-0.0109312920898691
ADM5	TMEM255B	1	-0.0828207062807738
ADM5	ZNF385D	1	-0.0842672093378677
ADORA1	APBB1IP	1	-0.0100859065788474
ADORA1	DGAT1	1	-0.008269652159587759
ADORA1	DGAT2	1	-0.0340361903348842
ADORA1	FAM134B	1	-0.0166222190578543
ADORA1	GPAM	1	-0.040330996215646
ADORA1	LGALS12	1	-0.100313432953378
ADORA1	PRRT4	1	-0.0184238405937354
ADORA1	RORC	1	-0.00475554894321565
ADORA1	SLC35C1	1	0.0212249783146877
ADORA1	SREBF1	1	-0.111345309174992
ADORA1	THRSP	1	-0.036560339418355
ADORA3	C1orf162	1	-0.0309825027810914
ADORA3	NCF4	1	-0.0228614885573353
ADORA3	RNASE1	1	-0.0236576782415958
ADORA3	VSIG4	1	-0.00705889520356963
ADPRH	THOC1	1	0.0312482897926699
ADRA2A	MGAT3	1	-0.0303846670119949
ADRA2A	RTN4RL1	1	-0.0741186929662119
ADRA2B	ALDOA	1	-0.0197614317538253
ADRA2B	APLN	1	-0.0318838027346535
ADRA2B	RRAD	1	-0.0611883966052181
ADRA2C	CRMP1	1	0.0320041454968118
ADRA2C	GATA6	1	-0.0373513933965018
ADRA2C	GNAO1	1	-0.00408662347530559
ADRA2C	HAPLN2	1	-0.0418765319438958
ADRA2C	HSD17B6	1	-0.0322930942384817
ADRA2C	ITPR1	1	-0.0941707591037805
ADRA2C	JPH2	1	-0.0317329467663533
ADRA2C	KCNH2	1	-0.0440133075397057
ADRA2C	KCTD15	1	-0.0373983146988046
ADRA2C	P2RX1	1	-0.00379787009123736
ADRA2C	PLA1A	1	-0.0229267821434077
ADRA2C	PRKG1	1	-0.00517584133600728
ADRA2C	RAMP3	1	-0.0417472035551463
ADRA2C	RASD2	1	-0.0181163619096493
ADRA2C	RASL12	1	-0.0157938392531846
ADRA2C	RNF180	1	-0.0285289558471398
ADRA2C	RYR2	1	-0.0344678391162621
ADRA2C	SELM	1	-0.0559237664286628
ADRA2C	SH3BGRL	1	-0.00133800168098512
ADRA2C	TCEAL1	1	-0.0508625328493686
ADRA2C	WFDC2	1	-0.0612801918316778
ADRB1	TBX5	1	-0.0451418315759606
ADRB2	AIF1L	1	-0.0867890986919348
ADRB2	B3GNT5	1	-0.108626459241651
ADRB2	CASKIN2	1	-0.0260905946611927
ADRB2	CCRL2	1	-0.0712976129395491
ADRB2	DLL1	1	-0.0213283106452291
ADRB2	EXT1	1	-0.0066337702502357
ADRB2	GNAI1	1	-0.0214595515327353
ADRB2	GNAZ	1	-0.0546573384800894
ADRB2	KALRN	1	-0.0299585517666332
ADRB2	KLF11	1	-0.12803281489233698
ADRB2	MGAT1	1	-0.0034255761422155397
ADRB2	NOSTRIN	1	-0.0469779289803218
ADRB2	PDK4	1	-0.19613148626794397
ADRB2	SCN4A	1	-0.133373654289834
ADRB2	SIK1	1	-0.09076872836062501
ADRB2	SNAI1	1	-0.11356131883995199
ADRB2	SNRK	1	-0.0388676578036123
ADRB2	SNX33	1	0.0031024504232624803
ADRB2	TRABD2A	1	-0.0356797317220534
ADRB2	TSPAN6	1	-0.0188909860505215
ADRB2	WNK1	1	-0.0469474843490252
ADRBK1	ANKRD13D	1	-0.0539299459847548
AEBP1	ANTXR1	1	-0.0216650697664171
AEBP1	CTHRC1	1	-0.00504253919135802
AEBP1	CTSK	1	-0.0379665575736833
AEBP1	EMILIN1	1	-0.000185272261322351
AFAP1	CMIP	1	-0.0710879262340594
AFAP1	LHX6	1	-0.00273878710747125
AFAP1	PRKCH	1	-0.0056567843964574
AFAP1L1	N4BP3	1	-0.00673007535719675
AFAP1L2	FRMD3	1	-0.0192711689566176
AFAP1L2	HSPB3	1	0.0431638917619939
AFAP1L2	ITGB4	1	-0.0267440982818215
AFF2	B3GALTL	1	-0.0620592193177686
AFF2	CORIN	1	-0.0593679437605393
AFF2	MBNL3	1	-0.0160219780150677
AFF2	NPY2R	1	-0.0523974965754082
AFF2	PON2	1	-0.0266653341069078
AFF2	PROK1	1	-0.0965393062844857
AFF2	RSPO1	1	-0.0352533100427775
AFF2	SLC7A10	1	0.00139343740257219
AFF2	SLITRK4	1	-0.0324619398739259
AFF2	SPINK2	1	-0.0206758416780437
AGAP1	DBN1	1	-0.0205396848251374
AGAP1	GAS7	1	-0.0255133875797496
AGAP1	TRIO	1	-0.0310710594650743
AGAP2	CCR10	1	-0.00645853998578341
AGAP2	COX4I2	1	-0.108211134988371
AGAP2	SCN4B	1	-0.036234121628359005
AGAP2	TMEM74B	1	-0.0226775458918325
AGAP2	VIPR1	1	-0.15322660437638
AGFG2	CARD10	1	-0.0198588408845252
AGFG2	CDC42EP3	1	-0.0901760230274199
AGFG2	DLL4	1	-0.11127181922483301
AGFG2	EFNA1	1	-0.10847142689310302
AGFG2	FBXO31	1	-0.0355169242237387
AGFG2	GPR146	1	-0.0204119547034057
AGFG2	KIF17	1	-0.00909418492147587
AGFG2	LRMP	1	-0.0544834851445059
AGFG2	MECOM	1	-0.0897528803502557
AGFG2	NYAP1	1	-0.0379000542328828
AGFG2	PDIA5	1	-0.0529628679270526
AGFG2	PEAR1	1	-0.049929132227178
AGFG2	PLOD1	1	-0.0038190992395468297
AGFG2	THSD7A	1	-0.00359854677090955
AGL	MDK	1	0.00699062656099602
AGPAT2	C14orf180	1	-0.0810705245925553
AGPAT2	DGAT2	1	-0.102884383810836
AGPAT2	GPAM	1	-0.0981766857853358
AGPAT2	GPD1	1	-0.0397349188365772
AGPAT2	GPT	1	-0.00991062961401234
AGPAT2	GYG2	1	-0.0188114105388414
AGPAT2	HOOK2	1	-0.0458976904987158
AGPAT2	LDHD	1	-0.0132458629751828
AGPAT2	LGALS12	1	-0.136291338284416
AGPAT2	LPL	1	-0.00410331993527432
AGPAT2	MARC1	1	-0.14368099229886
AGPAT2	MRAP	1	-0.048071363916845
AGPAT2	NMB	1	-0.0441174957016638
AGPAT2	OPLAH	1	-0.0324517639692836
AGPAT2	PC	1	-0.11939673576412299
AGPAT2	PFKFB1	1	-0.0516899756117769
AGPAT2	PLIN1	1	-0.052366063079688
AGPAT2	PNPLA2	1	-0.10719419022878399
AGPAT2	RBP4	1	-0.0956438534407415
AGPAT2	TUSC5	1	-0.0149005442618931
AGPAT4	IL12RB2	1	0.0034990683861029
AGPAT4	LIMD2	1	0.0252777967003446
AGPAT4	MICAL1	1	-0.0185503547426201
AGPAT4	MYO9B	1	-0.0036259677741328
AGPAT4	SDS	1	-0.0475142549521489
AGPAT4	SLAMF9	1	-0.00148136906164098
AGPAT4	STX4	1	-0.0681167863117743
AGPAT9	AMN	1	-0.0922377107449298
AGPAT9	GLIS1	1	-0.0375592381751399
AGPAT9	KIAA1239	1	-0.0621467143192422
AGPAT9	PTPN3	1	-0.0143274280170063
AGPAT9	SLC27A2	1	-0.0367171252019264
AGPAT9	TTC36	1	-0.0417551984737072
AGRN	COX4I2	1	-0.00824279830198253
AGRN	LY6E	1	-0.0366341075053775
AGRN	NCK2	1	-0.00250735438482869
AGTR1	GLUL	1	-0.00316149850208515
AGTR1	PPAP2B	1	-0.0407677416338962
AGTR1	PRR16	1	-0.0083313482539561
AGTRAP	HDAC7	1	-0.0288892063627053
AGTRAP	MVP	1	-0.0533123751385173
AHDC1	BCL9L	1	-0.110935753302552
AHDC1	BCORL1	1	-0.126996179125151
AHDC1	FAM212A	1	-0.0143293835088107
AHDC1	HDAC7	1	-0.030305784252413
AHDC1	LRRC8A	1	-0.0618621016166236
AHDC1	MKL1	1	-0.0126480894945583
AHDC1	PGF	1	-0.0248217360633675
AHDC1	SH2D3C	1	-0.00720025298500128
AHDC1	SMARCD2	1	-0.0189597014628128
AHDC1	SNAI2	1	-0.007587691591859241
AHDC1	ZBTB7B	1	-0.017410525918995
AHRR	CYP1A1	1	-0.0504686489683161
AHSA1	HSPH1	1	-0.0123723908758032
AHSP	ALAS2	1	-0.199498718601094
AHSP	CA1	1	-0.156932616762761
AIF1	ALOX5	1	-0.0265684786182843
AIF1	AP1B1	1	-0.0209444200697002
AIF1	ARHGAP30	1	-0.0145696413674163
AIF1	ARHGAP4	1	-0.0697628632372254
AIF1	C1QA	1	-0.016608055120261003
AIF1	C1QB	1	-0.0738477120892132
AIF1	C1QC	1	-0.0532803481132514
AIF1	C1orf162	1	-0.129687049346213
AIF1	CD14	1	-0.0366678893440054
AIF1	CD4	1	-0.004467347975444061
AIF1	CLEC10A	1	-0.0692483144149798
AIF1	CRYBB1	1	-0.0989218928401136
AIF1	CYBB	1	-0.0297361783153471
AIF1	DOCK2	1	-0.0576707587144369
AIF1	DOK3	1	-0.0314370875657088
AIF1	EBI3	1	-0.0187561301853829
AIF1	F13A1	1	-0.112484853358324
AIF1	FOLR2	1	-0.0126039199978427
AIF1	GNA15	1	-0.0516891368571138
AIF1	HCK	1	-0.125746871136453
AIF1	HCLS1	1	-0.00793800091436892
AIF1	HK3	1	-0.0472322099193341
AIF1	KCNQ1	1	-0.0322769531438377
AIF1	LGI2	1	-0.0314214857738585
AIF1	LST1	1	-0.0560569762263285
AIF1	MYO7A	1	-0.043020291927306
AIF1	NCF4	1	-0.042518918799911
AIF1	PLB1	1	-0.0246300649364096
AIF1	PLTP	1	-0.01904073705973
AIF1	PTPN18	1	-0.0036090313071255
AIF1	S100A9	1	-0.058954962153362996
AIF1	STAB1	1	-0.0201352431444419
AIF1	TLR8	1	-0.0315455932646826
AIF1	VAMP8	1	-0.16293142270093
AIF1	VSIG4	1	-0.096317090673477
AIF1	WAS	1	-0.12804073428570098
AIF1L	ARHGAP31	1	-0.0101821853306168
AIF1L	CASKIN2	1	-0.0487363993539112
AIF1L	EFNB1	1	-0.117722238551504
AIF1L	EPHB4	1	-0.025491418317025002
AIF1L	ESAM	1	-0.0222880028983629
AIF1L	ETS1	1	-0.0778718618549195
AIF1L	FGF12	1	-0.0010807120333732
AIF1L	FMNL2	1	0.0050075706179146
AIF1L	GNAZ	1	-0.0575235318553413
AIF1L	HEG1	1	-0.0979226250375679
AIF1L	HSPA12B	1	-0.0221855120837551
AIF1L	KIAA1217	1	-0.019871852362633
AIF1L	MESDC1	1	-0.009953130575677559
AIF1L	MFSD6	1	-0.0487044948110811
AIF1L	MGAT1	1	-0.0338015990453375
AIF1L	NOVA2	1	-0.0239666364416163
AIF1L	PPP1R16B	1	-0.0947830284065346
AIF1L	PREX1	1	-0.0369360586509736
AIF1L	SCN4A	1	-0.10422209160008801
AIF1L	SGK223	1	-0.0179027696275095
AIF1L	SLC9A3R2	1	-0.087093765344305
AIF1L	TCN2	1	-0.0400196565740352
AIF1L	TMEM88	1	-0.0096810584675478
AIF1L	ZBTB46	1	-0.14182631054201503
AIP	CTSF	1	-0.00429751768283851
AJUBA	LINGO1	1	-0.00993008623924511
AK5	ANGPTL7	1	-0.0041462665708281
AK5	LGR6	1	-0.00355881734340151
AK5	PMP2	1	-0.007549700451083141
AK5	SORCS1	1	-0.00347149562801188
AKAP1	EDNRA	1	-0.008930070616019591
AKAP1	FABP4	1	-0.0030671806051764602
AKAP1	PIK3R1	1	0.0121982978512059
AKAP1	TMOD1	1	-0.00987295640732508
AKAP12	FGFR1	1	-0.0291552182462813
AKAP12	NDRG1	1	-0.011883365675550999
AKAP13	AMOT	1	-0.0415779814644885
AKAP13	ARID5B	1	-0.0142845199418521
AKAP13	DCN	1	-0.0203494633589449
AKAP13	FSTL1	1	-0.0115051862658506
AKAP13	HOXA9	1	0.0228512712356954
AKAP13	ITPKC	1	-0.0214861084125484
AKAP13	LAMA3	1	-0.027180165904061998
AKAP13	MKL1	1	-0.0419753724414161
AKAP13	SH3PXD2B	1	-0.0685166290246111
AKAP13	SYTL3	1	-0.0376746106745331
AKAP13	TLDC2	1	-0.0669899950240077
AKAP2	EFNB1	1	-0.0182363800071597
AKAP2	EXT1	1	-0.00034899367938303
AKAP2	GNAZ	1	-0.0290268403471741
AKAP2	GNG12	1	-0.014488408408567
AKAP2	TBC1D9	1	-0.0614940614209146
AKAP2	TRAM1	1	-0.0270815138227596
AKAP6	CDK18	1	-0.0252517173044041
AKAP6	CSDC2	1	-0.00901750557450907
AKAP6	DGKG	1	-0.0038275634937312295
AKAP6	DOCK3	1	-0.0393782805525444
AKAP6	HEY2	1	-0.0617686074274968
AKAP6	HTR1B	1	-0.00975620470671175
AKAP6	IGSF9B	1	-0.0152564556262774
AKAP6	ITIH3	1	-0.11886906452877599
AKAP6	KCNA5	1	-0.0020128664637156
AKAP6	LTBP1	1	-0.0414949497406457
AKAP6	MPP7	1	-0.104124534469178
AKAP6	MYOCD	1	-0.0358913559898955
AKAP6	MYOZ1	1	-0.101676599643915
AKAP6	NCS1	1	-0.111760277486555
AKAP6	NTF3	1	-0.153116047554272
AKAP6	P2RX1	1	-0.0690693675192214
AKAP6	PLEKHO1	1	-0.0593823164706409
AKAP6	RAMP1	1	-0.0111880653097854
AKAP6	REEP1	1	-0.0193997381595882
AKAP6	RYR2	1	-0.0775938687308584
AKAP6	TPM2	1	-0.00904843520824827
AKAP9	GLI3	1	-0.0148372762252074
AKAP9	SMURF1	1	-0.09070485903375301
AKT3	GAS2L1	1	-0.0168463202148036
AKT3	GNG11	1	-0.0252880303733103
AKT3	LRRC8A	1	-0.0261819384693327
AKT3	NLRP1	1	-0.006637049308091439
AKT3	ST6GAL1	1	-0.0407951706059593
AL807752.1	COMTD1	1	-0.0203794926011247
ALAS1	DLAT	1	-0.0284791341819386
ALAS2	CA1	1	-0.24861886639324102
ALAS2	PPBP	1	-0.0190797004288699
ALB	APOA2	1	-0.28315354336468396
ALB	APOC3	1	-0.235110053299934
ALCAM	AQP9	1	-0.0496740230331289
ALCAM	ASPHD1	1	-0.00486584559468513
ALCAM	C12orf5	1	-0.0575229978353904
ALCAM	C1orf228	1	-0.0006415669210415201
ALCAM	C9orf16	1	-0.0427966062283033
ALCAM	CCDC88A	1	-0.0687166315242122
ALCAM	CD300LB	1	-0.0522191293571632
ALCAM	CD52	1	-0.0606188475211656
ALCAM	CD9	1	-0.0171865986276624
ALCAM	CTSD	1	-0.00799667716287201
ALCAM	DCSTAMP	1	-0.0336725238022425
ALCAM	DOCK3	1	-0.16717288624954998
ALCAM	F13A1	1	0.009056240573922859
ALCAM	GCLC	1	-0.0214643437410284
ALCAM	GLA	1	-0.0326508690416241
ALCAM	HEXB	1	-0.0512809458361784
ALCAM	IFI30	1	-0.0196720021041812
ALCAM	IFITM10	1	-0.0141543513617753
ALCAM	IGSF6	1	-0.0351114259525075
ALCAM	IL1RN	1	-0.08730219410739799
ALCAM	IL24	1	-0.00976737865181098
ALCAM	KCNN4	1	-0.0568019372143379
ALCAM	LIPA	1	-0.0523468036442897
ALCAM	MAP4K3	1	-0.0308645660274953
ALCAM	MATK	1	-0.12324105734252899
ALCAM	MSR1	1	-0.0191656444513388
ALCAM	MYO9B	1	-0.0369856635295917
ALCAM	NCEH1	1	-0.134800325249129
ALCAM	PLA2G7	1	-0.0438667728063408
ALCAM	PSEN2	1	-0.00873971229956
ALCAM	RPS6KA1	1	-0.0383627565488381
ALCAM	SLAMF9	1	-0.0686496414252158
ALCAM	SLC1A4	1	-0.0327195216541357
ALCAM	SPINT1	1	-0.032211547069127995
ALCAM	SPOCD1	1	-0.0819402111840138
ALCAM	SPP1	1	-0.0036872128515159897
ALCAM	ST14	1	-0.0545059746402923
ALCAM	STX4	1	-0.0156034887553226
ALCAM	TBC1D8	1	-0.0540464941470899
ALCAM	TCIRG1	1	-0.0715855862598427
ALCAM	TFRC	1	-0.00145979701947585
ALCAM	TNFRSF11A	1	-0.00341148146964326
ALCAM	TNNI2	1	-0.034067240678369
ALCAM	TREM2	1	-0.0903270202661843
ALCAM	TREML1	1	-0.0594260754935043
ALCAM	ZNF219	1	-0.00518714732677626
ALDH18A1	MAGED1	1	-0.0245362472785745
ALDH1A2	C10orf128	1	-0.00660267725752186
ALDH1A2	MLPH	1	-0.0277221559058261
ALDH1A2	PLAT	1	-0.0249894983238576
ALDH1A2	TM6SF1	1	-0.00818582888468633
ALDH1A2	TSPAN7	1	-0.0498381361291061
ALDH1L1	CIDEA	1	-0.0396996659195041
ALDH1L1	DECR1	1	-0.000659072358468984
ALDH1L1	ECHS1	1	-0.0220640715827041
ALDH1L1	GLYCTK	1	-0.0229938736151173
ALDH1L1	GPT2	1	-0.0291201439993991
ALDH1L1	GYG2	1	-0.141280215555515
ALDH1L1	HADH	1	-0.0397659347229644
ALDH1L1	LDHD	1	-0.0816829529995041
ALDH1L1	LPL	1	-0.0112801030847798
ALDH1L1	PC	1	-0.0247096338511031
ALDH1L1	PFKFB1	1	-0.0322378725371356
ALDH1L1	PLA2G16	1	-0.0449338071422227
ALDH1L1	REEP6	1	-0.0246466783685985
ALDH1L1	SLC7A10	1	-0.0999454950746244
ALDH1L1	TM7SF2	1	-0.0721993458662866
ALDH1L1	TTC36	1	-0.0557951449495595
ALDH1L2	COL5A1	1	-0.0740911428739005
ALDH1L2	COL5A2	1	-0.00502253644413441
ALDH1L2	NAGS	1	-0.0204397396733902
ALDH2	C12orf39	1	-0.0217393795317476
ALDH2	GLYAT	1	-0.0688720035941424
ALDH2	GPD1	1	-0.0121351231991173
ALDH2	NAT8L	1	-0.146874074709139
ALDH2	PC	1	-0.0109690629773247
ALDH2	PLA2G16	1	-0.0567227862052339
ALDH2	PLIN1	1	-0.12073053157432198
ALDH2	PPP1R1A	1	-0.0602163636953131
ALDH2	PPP1R1B	1	-0.0248199159994055
ALDH2	PTPRF	1	-0.00857662837588322
ALDH2	TM7SF2	1	-0.0457095106114283
ALDH2	TUSC5	1	-0.0398906086614206
ALDH3A2	ANXA1	1	-0.00775321266992373
ALDH3A2	CDKN1C	1	0.0148330908900452
ALDH3A2	SEPT4	1	0.000641434180584778
ALDH4A1	BAG3	1	-0.0641236900829118
ALDH4A1	CYP4B1	1	-0.0591988706430987
ALDH4A1	DERL1	1	0.0591805800279962
ALDH4A1	EIF4G1	1	-0.0669248346135574
ALDH4A1	GPBAR1	1	-0.0297025763802868
ALDH4A1	KIFC3	1	0.008580479006630191
ALDH4A1	KRT79	1	0.0257943021399845
ALDH4A1	MAN1A1	1	-0.0829770342669086
ALDH4A1	NCKAP5L	1	-0.00427251952349692
ALDH4A1	NME3	1	-0.0172076003974562
ALDH4A1	NOL3	1	-0.00198950226757182
ALDH4A1	P2RX6	1	-0.0734267520242447
ALDH4A1	PISD	1	-0.0685453356215171
ALDH4A1	PLXNB2	1	-0.007652923513467959
ALDH4A1	RRAS	1	-0.0994880862472869
ALDH4A1	SNCG	1	-0.0318451688992252
ALDH4A1	TEX2	1	-0.010171022780014999
ALDH4A1	THAP8	1	-0.0105951018313674
ALDH4A1	TK2	1	-0.0100730055780799
ALDH4A1	TMEM178A	1	-0.0237701195468035
ALDOA	ANKRD37	1	-0.0126620066493288
ALDOA	APLN	1	-0.041221885271193
ALDOA	CKMT2	1	-0.0949521557660137
ALDOA	CTSO	1	0.0203820913690247
ALDOA	EGLN3	1	-0.026099169558478
ALDOA	ENO1	1	-0.17479104225772898
ALDOA	GBE1	1	-0.0388187246529036
ALDOA	GYS1	1	-0.042497814696105
ALDOA	KDM3A	1	-0.0353549918706642
ALDOA	MESDC1	1	0.0102532839346592
ALDOA	MGLL	1	-0.0016490886819811599
ALDOA	PFKP	1	-0.0269466123577048
ALDOA	PPP1R3G	1	-0.0597901041064534
ALDOA	ZNF395	1	-0.0226540148426717
ALG6	MTPN	1	0.0022696821854315398
ALOX15B	PTK2B	1	-0.0485951899420586
ALOX5	ALOX5AP	1	-0.122287859020912
ALOX5	ARHGAP4	1	-0.0375320759266677
ALOX5	ASGR2	1	-0.0115098152208354
ALOX5	CD163	1	-0.1073901370991
ALOX5	CLEC10A	1	-0.00988353285600813
ALOX5	DCSTAMP	1	0.0207496525787035
ALOX5	F13A1	1	-0.0142456069477347
ALOX5	FAM105A	1	-0.0041923527186795
ALOX5	FAM26F	1	-0.0208210513812577
ALOX5	FGD3	1	-0.0397202005566268
ALOX5	GPC4	1	0.0552615273891118
ALOX5	HCLS1	1	-0.10762203557114
ALOX5	IL1R2	1	-0.0350636939522807
ALOX5	MYO7A	1	-0.0126159314919773
ALOX5	NOD2	1	-0.0066911240559835395
ALOX5	PLB1	1	-0.00705615005787852
ALOX5	PSTPIP1	1	-0.0589714596433258
ALOX5	S100A9	1	-0.0501839368175271
ALOX5	SELPLG	1	-0.12300787634871699
ALOX5	SERPINA1	1	-0.0282570376869672
ALOX5	STAB1	1	-0.0146556238982991
ALOX5	WAS	1	-0.028428582995881
ALOX5AP	ARHGAP4	1	-0.0431320820950875
ALOX5AP	C1QA	1	-0.0172811714138721
ALOX5AP	C1QC	1	-0.0329145371175745
ALOX5AP	C3AR1	1	-0.00251320715377878
ALOX5AP	CD163	1	-0.0733987779976
ALOX5AP	CD200R1	1	-0.0325074446802363
ALOX5AP	CYBB	1	-0.07436876313728501
ALOX5AP	FAM105A	1	-0.0309682887041189
ALOX5AP	IGSF21	1	-0.0619852560246468
ALOX5AP	ITGAM	1	-0.148141874554318
ALOX5AP	KCNQ1	1	-0.10236614743841699
ALOX5AP	LYVE1	1	-0.11686130189503999
ALOX5AP	MYO7A	1	-0.0683936424988057
ALOX5AP	P2RY14	1	-0.0258912641390793
ALOX5AP	PARP16	1	0.0012945762405844599
ALOX5AP	PSTPIP1	1	-0.0296208101208769
ALOX5AP	RNASE1	1	-0.020588701829501
ALOX5AP	SCN1B	1	-0.00263645844162822
ALOX5AP	SELPLG	1	-0.132045064798411
ALOX5AP	STAB1	1	-0.0608057625878603
ALOX5AP	VSIG4	1	-0.0491638525768437
ALPK2	COL1A1	1	-0.0131517952014985
ALPK2	COL1A2	1	-0.0586652766064924
ALPK2	COL6A6	1	-0.0344423328873592
ALPK2	DKK1	1	-0.0613709938186607
ALPK2	MMP27	1	-0.007947037973922709
ALPK2	PDE7A	1	-0.037989458487686
ALPK2	SMOC2	1	-0.0938163189387421
ALPK3	AMN	1	-0.0332165568261019
ALPK3	PYGM	1	-0.00693785280604843
ALS2CL	MLPH	1	-0.00275767256155035
AMDHD2	TNFRSF14	1	-0.0761515430366349
AMICA1	AOAH	1	-0.16071799229047698
AMICA1	C11orf21	1	-0.0269932188155263
AMICA1	CCR2	1	-0.00831627353098828
AMICA1	CD1C	1	-0.007881844179400771
AMICA1	CXCR4	1	-0.0476931695477667
AMICA1	DEF6	1	-0.0078829313420179
AMICA1	FCN1	1	-0.0103021343810902
AMICA1	FGD3	1	-0.0197837190387782
AMICA1	GAPT	1	-0.0318764468785065
AMICA1	PTPRC	1	-0.0611584141353241
AMICA1	RGS18	1	-0.0572992141174836
AMICA1	RNASE6	1	-0.00269362224743618
AMICA1	SNX20	1	-0.0131440424180506
AMIGO2	FOXL1	1	-0.011049506164305
AMIGO2	GABRA4	1	-0.0399565796088164
AMIGO2	GUCY1A3	1	-0.0122854596314499
AMIGO2	HEY2	1	-0.0674131348581388
AMIGO2	HTR1B	1	-0.185521440665893
AMIGO2	ITIH3	1	-0.0796358413927606
AMIGO2	KCNA5	1	-0.0144793076577081
AMIGO2	LTBP1	1	-0.00892769588246078
AMIGO2	MYOZ1	1	-0.00338924444318701
AMIGO2	P2RX1	1	-0.0454158649450058
AMIGO2	RASSF3	1	-0.0143650477124605
AMIGO2	RERGL	1	-0.0370654453307782
AMIGO2	SORBS2	1	-0.0194959488309737
AMIGO2	WFDC1	1	-0.0059645294582425104
AMN	TTC36	1	-0.0393864204909665
AMOT	KIFC3	1	0.0237483067738359
AMOT	NTRK2	1	-0.0167272373577075
AMOT	PIK3R1	1	-0.0178103723646691
AMOTL1	CUTC	1	0.00370215874816973
AMOTL1	EXTL3	1	-0.0290161895153351
AMOTL1	PPP1R16B	1	-0.007667133373864991
AMOTL1	SDC3	1	-0.013370796534344998
AMOTL1	SLCO4A1	1	0.0132014458526906
AMOTL1	UNC119B	1	-0.0122801840730782
AMOTL2	AOX1	1	-0.0235555753036765
AMOTL2	CSF1	1	-0.0626971264427557
AMOTL2	HDAC7	1	-0.0129842807853562
AMOTL2	LATS2	1	-0.0339032389780864
AMOTL2	NPR3	1	-0.0300258258517163
AMOTL2	NR2F2	1	-0.0195958282590466
AMOTL2	SVEP1	1	-0.015250776582851002
AMPD2	TFRC	1	-0.00148808965188577
ANG	APMAP	1	-0.03423416506082
ANG	CRLS1	1	-0.0829637054288313
ANG	DNAH9	1	-0.00041009695370266603
ANG	KIAA0922	1	-0.0642880032484927
ANG	L3MBTL1	1	-0.0352591700558997
ANG	PAPSS1	1	-0.0323618343151939
ANG	PDE1B	1	-0.0201531886790647
ANGEL1	SLC23A2	1	-0.0013436290388105301
ANGPT1	APBB2	1	-0.0577477589356246
ANGPT1	ARHGAP10	1	-0.0062323702145248
ANGPT1	ARHGAP6	1	-0.0595612852588926
ANGPT1	CUTC	1	-0.0475030515035754
ANGPT1	EPHB6	1	-0.0316261697158578
ANGPT1	FAM198B	1	-0.00170006598062716
ANGPT1	FRZB	1	-0.0792862575317448
ANGPT1	GRK5	1	-0.0068985614709062
ANGPT1	LRRN3	1	-0.0163566269908945
ANGPT1	MAN1A1	1	-0.0521233124114403
ANGPT1	NPR3	1	-0.138356472458619
ANGPT1	NPY1R	1	-0.0396461436862873
ANGPT1	NTRK2	1	-0.0124305395618527
ANGPT1	PARD3B	1	-0.17668515765620801
ANGPT1	PCDH9	1	-0.10358706842638399
ANGPT1	RANBP3L	1	-0.109096125287051
ANGPT1	RRAGD	1	0.00466027230533566
ANGPT1	TNIP1	1	-0.00287858338722659
ANGPT1	TRNP1	1	-0.0193908188064257
ANGPT1	ZNF703	1	-0.0154368982404382
ANGPT4	MAP1B	1	-0.024435165474075
ANGPT4	NDRG2	1	-0.0180670219470755
ANGPT4	PCDH9	1	-0.0006491080912659799
ANGPT4	RANBP3L	1	-0.00795431008086797
ANGPT4	SEMA3G	1	-0.0156444241402019
ANGPT4	TIMP3	1	-0.0111053557613681
ANGPTL1	ATP9A	1	0.039967053023232
ANGPTL1	BMP2	1	-0.000549948491111757
ANGPTL1	CD248	1	-0.0509508782263147
ANGPTL1	CLEC3B	1	-0.0391813247032497
ANGPTL1	CNST	1	-0.0472629926991655
ANGPTL1	CST3	1	-0.00870978346503199
ANGPTL1	CYBA	1	-0.0488268899527399
ANGPTL1	CYP4B1	1	-0.0284901070877909
ANGPTL1	FAM83G	1	0.0177192364927669
ANGPTL1	FLYWCH2	1	-0.00632529255121103
ANGPTL1	KCNAB2	1	-0.0315353381678619
ANGPTL1	KLF9	1	-0.00617852404504138
ANGPTL1	LDLRAD4	1	-0.0276834204189515
ANGPTL1	LIMS2	1	-0.0108991142838399
ANGPTL1	MAMDC2	1	-0.173653593564345
ANGPTL1	MBNL1	1	-0.0178297613522493
ANGPTL1	PARM1	1	-0.19027964289369104
ANGPTL1	PELI1	1	-0.0386382922894921
ANGPTL1	PIK3R5	1	-0.0473214940443384
ANGPTL1	PPAP2A	1	-0.0051612979869676105
ANGPTL1	RAMP2	1	-0.0144129383471625
ANGPTL1	ST6GALNAC6	1	0.00704133917453978
ANGPTL1	TACC1	1	-0.215159506797442
ANGPTL1	TAGLN	1	-0.0020590806271927
ANGPTL1	THEMIS2	1	-0.0243797313817042
ANGPTL1	TIMP3	1	-0.0803773169964923
ANGPTL1	WASF3	1	-0.0165732421780446
ANGPTL2	DPP4	1	-0.0760342788646591
ANGPTL2	GNA13	1	0.0156098660351688
ANGPTL2	MMP2	1	-0.0214991495130557
ANGPTL2	PAM	1	-0.0125637864879717
ANGPTL5	ANXA4	1	-0.00665373493056464
ANGPTL5	CILP	1	-0.10508366070360199
ANGPTL5	CYBRD1	1	-0.00951449649644958
ANGPTL5	DBN1	1	-0.0269974250920543
ANGPTL5	DCN	1	-0.076606673155914
ANGPTL5	DKK2	1	-0.0188026185160452
ANGPTL5	FAM180B	1	-0.23941390345306895
ANGPTL5	FNDC1	1	-0.0147579447050199
ANGPTL5	IGFBP6	1	-0.028660612283382996
ANGPTL5	ITGA11	1	-0.08189634334545699
ANGPTL5	LTBP2	1	-0.0725250253083126
ANGPTL5	MMP27	1	-0.0579973961462096
ANGPTL5	MYOC	1	-0.037549595519438
ANGPTL5	NTN1	1	-0.0185096272504191
ANGPTL5	OMD	1	-0.062465069721968
ANGPTL5	PCOLCE2	1	-0.0736956569609516
ANGPTL5	PDGFRL	1	-0.0140212610348422
ANGPTL5	PLXDC2	1	-0.0503374607420304
ANGPTL5	QPCT	1	-0.0368609572915007
ANGPTL5	RECK	1	-0.007564777377895809
ANGPTL5	RGMA	1	-0.0062230245675383
ANGPTL5	SCARA5	1	-0.0383210718619585
ANGPTL5	SERPINA5	1	-0.00449751073472584
ANGPTL5	TIMP2	1	-0.0620324444076604
ANGPTL5	TRIM29	1	-0.109460350565488
ANGPTL7	CLDN1	1	-0.0116106695241255
ANGPTL7	COL9A3	1	-0.00473848073001911
ANGPTL7	DRP2	1	-0.0270878271931515
ANGPTL7	EMILIN3	1	-0.0427964592172273
ANGPTL7	ITGB8	1	-0.0320258130265341
ANGPTL7	MPZ	1	-0.0654011181162649
ANGPTL7	NGFR	1	-0.00552743400395853
ANGPTL7	PLP1	1	-0.0184707106161567
ANGPTL7	PMP2	1	-0.0230314318273491
ANGPTL7	PTPN5	1	-0.00556387399932275
ANGPTL7	SFRP5	1	-0.180971642160569
ANGPTL7	SORCS1	1	-0.0900135888909003
ANGPTL7	SORCS2	1	-0.0420185261774477
ANGPTL7	ZBTB7C	1	-0.0214636870895196
ANK2	AUTS2	1	-0.000487572843436429
ANK2	DPP4	1	-0.0683096251521212
ANK2	GAS7	1	-0.00434901486614378
ANK2	ISLR	1	-0.00607275313541343
ANK2	MAP1A	1	-0.0562084668045823
ANK2	MMP2	1	-0.00310533089242199
ANK2	NFATC2	1	-0.06128263066425
ANK2	NOVA1	1	-0.0523902109955334
ANK2	STON2	1	-0.0259608196343399
ANK2	THBS3	1	-0.052290613512119
ANK2	TNFAIP6	1	-0.0882587951975683
ANK3	ENTPD2	1	-0.0279286889480316
ANKMY2	HCLS1	1	0.0124752080634319
ANKRA2	PNISR	1	-0.0239541662455303
ANKRD1	MB	1	-0.0720932623311221
ANKRD1	MYL2	1	-0.0689501391463967
ANKRD1	MYL7	1	-0.0643923237532393
ANKRD1	NPPA	1	-0.0011289800308244401
ANKRD1	NPPB	1	-0.125271451286983
ANKRD1	TNNI3	1	-0.11356969464466901
ANKRD1	TNNT2	1	-0.0104176551158768
ANKRD10	CCDC85A	1	0.0280910762596187
ANKRD10	MTERFD3	1	-0.0533786733007442
ANKRD10	MTPN	1	0.046073920009871
ANKRD10	SLC1A3	1	-0.0506604249599001
ANKRD10	SLC25A27	1	-0.0341907129956055
ANKRD13B	COL6A3	1	-0.045014016933875
ANKRD13B	FAM180A	1	-0.0242549783645393
ANKRD13B	GPSM1	1	-0.0207925364028996
ANKRD13B	MRC2	1	-0.0110849475087759
ANKRD13B	MTMR11	1	-0.0139558809700972
ANKRD13D	NAB2	1	-0.00814390709448189
ANKRD28	APPL2	1	-0.02542998063685
ANKRD28	CACNB4	1	-0.00120926665590068
ANKRD28	COL6A3	1	-0.0717095914508982
ANKRD28	ECM1	1	-0.0411063681859248
ANKRD28	FAM180A	1	-0.0753397215757229
ANKRD28	MSRB1	1	0.00832950535123027
ANKRD28	SETD5	1	-0.00961830481695299
ANKRD28	TRIO	1	-0.0932839235952167
ANKRD29	C5orf54	1	0.0308302893824191
ANKRD29	CDH24	1	-0.0769911712731656
ANKRD29	CYYR1	1	-0.09404533875395801
ANKRD29	FAM13C	1	-0.00603459008057536
ANKRD29	GIPC2	1	-0.00306262915727676
ANKRD29	JRKL	1	0.0655538564290766
ANKRD29	LAMA3	1	-0.256743964926982
ANKRD29	LIFR	1	-0.0998791068219154
ANKRD29	NPDC1	1	-0.11968717468368902
ANKRD29	PARM1	1	-0.008154862359233109
ANKRD29	PLCB4	1	-0.0594261920523795
ANKRD29	RAPGEF3	1	-0.0122468733102867
ANKRD29	RUNDC3B	1	-0.0189485528695554
ANKRD29	ST6GALNAC1	1	-0.00674667899586937
ANKRD29	TSPAN7	1	-0.0586754002157199
ANKRD37	ARRDC3	1	-0.000411118922134246
ANKRD37	BHLHE40	1	-0.0922131990448979
ANKRD37	CDC42EP3	1	-0.00229267365938395
ANKRD37	CDKN1B	1	-0.0258675069862726
ANKRD37	EGLN3	1	-0.157727724079758
ANKRD37	HES1	1	-0.0855817984088374
ANKRD37	KDM3A	1	-0.127508982180006
ANKRD37	MLLT4	1	-0.00493619600796136
ANKRD37	MTFP1	1	-0.0844674256581361
ANKRD37	NEDD9	1	-0.0007549258582249531
ANKRD37	PPP1R3C	1	-0.0144655283145266
ANKRD37	SERPINE1	1	-0.00278542368792414
ANKRD37	SMAD7	1	-0.0087167486771432
ANKRD53	ASPH	1	0.14944749676637697
ANKRD53	C19orf80	1	0.0934216835378671
ANKRD53	CENPV	1	-0.0495671774174547
ANKRD53	EFNB1	1	-0.0131343509295447
ANKRD53	ELOVL5	1	0.00579539174759602
ANKRD53	EPB41L4B	1	-0.0334665136076676
ANKRD53	ESYT1	1	-0.0669413474286354
ANKRD53	FMNL2	1	0.00752289310568842
ANKRD53	GABRE	1	-0.0185157991189214
ANKRD53	GLIS1	1	-0.0047114245142596605
ANKRD53	IFNGR2	1	-0.0140125140182241
ANKRD53	IRS2	1	-0.00958434033666227
ANKRD53	KIAA1239	1	-0.162479547241376
ANKRD53	MAOB	1	-0.12037870382335801
ANKRD53	MAP3K5	1	-0.0247887165296658
ANKRD53	MCM6	1	-0.0482337368804828
ANKRD53	MGAT3	1	-0.0189759796622768
ANKRD53	MRPL46	1	-0.00328655723882065
ANKRD53	P2RX6	1	0.0249018249049405
ANKRD53	PDE1B	1	-0.0748293995343961
ANKRD53	PHLDA3	1	-0.00608069033406914
ANKRD53	PJA1	1	-0.00765442871448092
ANKRD53	PTPN3	1	-0.0279995751679319
ANKRD53	SCN4A	1	-0.0436875821763675
ANKRD53	TSPAN15	1	-0.0797605526870226
ANKRD53	VEGFA	1	-0.0310439551515558
ANKRD9	CITED4	1	-0.0220556000257955
ANKRD9	FAM229A	1	-0.0200854880785349
ANKRD9	FBXL15	1	-0.0455099489353903
ANKRD9	NR2F6	1	-0.0129114110351502
ANKRD9	PDF	1	-0.0357281722642269
ANKRD9	TMEM160	1	-0.0910111773405312
ANKS1A	ARRDC2	1	-0.0018957063063438399
ANKS1A	INPP5D	1	-0.0022317942620334
ANLN	ASF1B	1	-0.0228464919599202
ANLN	BUB1B	1	-0.0298165360749989
ANLN	CCNB2	1	-0.0542767100773998
ANLN	CDCA3	1	-0.0682605081731775
ANLN	CDCA5	1	-0.0481758531941791
ANLN	CENPF	1	-0.0258117011289129
ANLN	CEP55	1	-0.0454571892639851
ANLN	FOXM1	1	-0.10329241155984402
ANLN	IQGAP3	1	-0.053575582772723
ANLN	KIF2C	1	-0.0272896289008272
ANLN	MKI67	1	-0.0224619555093291
ANLN	MYBL2	1	-0.0296832399827695
ANLN	NUF2	1	-0.0239746865299018
ANLN	NUSAP1	1	-0.0118308938229984
ANLN	PKMYT1	1	-0.0631522426739325
ANLN	PTTG1	1	-0.0218705609347039
ANLN	TOP2A	1	-0.0770072300025141
ANLN	TPX2	1	-0.0870677162543557
ANO1	ARHGDIB	1	-0.0669064572158296
ANO1	GUCY1A2	1	-0.0103601804656655
ANO1	NOTCH3	1	-0.0577956675063753
ANO3	TMEM178A	1	-0.0627632184313907
ANO8	BMP1	1	-0.0728454486882797
ANO8	DDR1	1	-0.108579128213367
ANO8	PHLDA3	1	-0.011862634090726
ANO9	CD2	1	-0.0542869876566478
ANO9	CD3D	1	-0.0135860525102851
ANO9	CD3E	1	-0.0496339966253098
ANO9	CD5	1	-0.0108106387499377
ANO9	CD6	1	-0.0392997305370787
ANO9	GZMK	1	-0.0173217935386873
ANO9	ITK	1	-0.0755909950954778
ANO9	KLRB1	1	-0.0405101522573896
ANO9	LCK	1	-0.0661299854862152
ANO9	LTB	1	-0.0149551948328494
ANO9	PLCH2	1	-0.0828316033583964
ANO9	RASGRP1	1	-0.0135722117280294
ANO9	RLTPR	1	-0.0514081445769331
ANO9	SH2D1A	1	-0.012570064078263
ANO9	TMC8	1	-0.0019577100336259103
ANO9	TRAT1	1	-0.0300165738862888
ANO9	ZAP70	1	-0.16258131168586498
ANPEP	ARHGAP6	1	-0.0241399835848618
ANPEP	CAV1	1	-0.0519647743409703
ANPEP	CD109	1	-0.0766417078415991
ANPEP	CD248	1	-0.0559229943390748
ANPEP	CD34	1	-0.0429751359105007
ANPEP	CNTN3	1	-0.0349996461780062
ANPEP	COL5A1	1	-0.00156686515881068
ANPEP	COL5A2	1	-0.048392405882673
ANPEP	COL5A3	1	-0.109046841809212
ANPEP	COL6A1	1	-0.0430131601645043
ANPEP	COL6A2	1	-0.0483299605805254
ANPEP	COL6A3	1	-0.0296056513085187
ANPEP	CORO2B	1	-0.0043409939072054605
ANPEP	CUTC	1	-0.0387430420882833
ANPEP	DNMBP	1	-0.117810012244289
ANPEP	ECM1	1	-0.00960049650366813
ANPEP	FSTL1	1	-0.0298308853264391
ANPEP	HERC5	1	0.0045265474457634
ANPEP	MAP1B	1	-0.0138954859460534
ANPEP	MAP3K5	1	0.00908818470250809
ANPEP	MFGE8	1	-0.0104076861245194
ANPEP	NCOA3	1	-0.0023655273520081
ANPEP	NMNAT3	1	0.0415342997331407
ANPEP	OLFML3	1	-0.0632247692402922
ANPEP	PFKFB2	1	0.0345016847091245
ANPEP	S100A4	1	-0.0350641065616651
ANPEP	SLIT3	1	-0.00580668075595194
ANPEP	SMARCD2	1	-0.0882333119390012
ANPEP	SNAI2	1	-0.023033098590938998
ANPEP	SOX13	1	-0.0342874295343906
ANPEP	STIM1	1	-0.0210610032187005
ANPEP	TRERF1	1	-0.0654430307051461
ANPEP	ZEB1	1	-0.0299902609113131
ANTXR1	CRTAC1	1	-0.0140047603895569
ANTXR1	CTSK	1	-0.16490962884177
ANTXR1	DPP4	1	-0.0292821376273009
ANTXR1	FAP	1	-0.0156783457598467
ANTXR1	MEGF6	1	-0.00228057585700341
ANTXR1	MMP14	1	-0.0927476558304582
ANTXR1	MMP2	1	-0.24972666122451398
ANTXR1	PLXDC2	1	-0.124435962294802
ANTXR1	THBS2	1	-0.0421271929043441
ANTXR1	TIMP2	1	-0.0858882683305639
ANTXR2	ARID5B	1	-0.0153744110618607
ANTXR2	CAV1	1	0.0159656791016717
ANTXR2	CPEB4	1	0.00304815354445112
ANTXR2	DAB2	1	-0.0388567135430243
ANTXR2	DDR1	1	-0.127047084513922
ANTXR2	GBE1	1	0.0354810102956215
ANTXR2	GLUL	1	-0.0531694050904248
ANTXR2	NR3C1	1	-0.0227220455424398
ANTXR2	PLAGL1	1	-0.0726439978520831
ANTXR2	PRDM8	1	-0.0490799378492348
ANTXR2	SLC39A14	1	-0.067879685888431
ANTXR2	VCAN	1	-0.0113614323599083
ANTXR2	ZNF217	1	-0.0022344410084783302
ANXA1	ANXA5	1	-0.131752413280641
ANXA1	CRYAB	1	-0.0801367140336365
ANXA1	LMNA	1	-0.0155120288148343
ANXA1	S100A10	1	-0.19773507602108398
ANXA1	S100A6	1	-0.0402917917217398
ANXA1	SEMA3C	1	-0.0789841018712294
ANXA1	STK40	1	-0.00104618672886417
ANXA2R	EFNA1	1	-0.0441389481558462
ANXA2R	HHEX	1	-0.0331708495477566
ANXA2R	HOXB4	1	-0.024186663964403003
ANXA4	DBN1	1	-0.11162157950718302
ANXA4	ECM1	1	-0.0492861370741824
ANXA4	EMP3	1	-0.10792583088159001
ANXA4	GAS7	1	-0.0540603311372519
ANXA4	NOVA1	1	-0.00277838637446398
ANXA4	PAMR1	1	-0.00335336593954652
ANXA4	PTPN18	1	-0.00216436512428311
ANXA4	SCARA5	1	-0.0111587077072299
ANXA4	SH3BGRL3	1	-0.0142201925680005
ANXA4	STARD9	1	-0.00328919029403613
ANXA5	CAPN2	1	-0.0861497484922016
ANXA5	HTRA1	1	-0.0039161642275891894
ANXA5	LGALS1	1	-0.0602509238541515
ANXA5	S100A10	1	-0.0524738362981643
ANXA5	S100A6	1	-0.0106297411083983
ANXA5	SH3BGRL3	1	-0.052492935392461
ANXA5	TNFRSF12A	1	-0.0243001293650953
ANXA6	MYL6	1	-0.0117800885386337
AOAH	CCR2	1	-0.00833653427418786
AOAH	CSF3R	1	-0.0299172645509715
AOAH	FCN1	1	-0.0614897019616461
AOAH	LIMD2	1	-0.006521693440184139
AOAH	PTPRC	1	-0.06527815304110901
AOAH	RGS18	1	-0.0920796425230861
AOAH	SNX20	1	-0.0343780335749946
AOC2	ASPH	1	-0.0609081609206152
AOC2	BTD	1	-0.0072752708278211
AOC2	C19orf80	1	-0.0295323254885776
AOC2	CAV1	1	-0.00114399044905751
AOC2	KIAA1239	1	0.0578280620019149
AOC2	MAPKAPK3	1	0.00225739223775261
AOC2	ORMDL3	1	0.0129536353930475
AOC2	P2RX6	1	-0.0148801136188136
AOX1	AR	1	-0.0286211559301667
AOX1	C1S	1	-0.14919646837707098
AOX1	CSF1	1	-0.00189768316194945
AOX1	CUTC	1	-0.0323716593581587
AOX1	CXCL14	1	-0.0177065025865061
AOX1	CYP4B1	1	-0.0330316941505069
AOX1	FSTL1	1	-0.0851193836219844
AOX1	LOX	1	-0.0666659428277082
AOX1	OLFML3	1	-0.0018259081094550301
AOX1	PARD3B	1	-0.0826939773044333
AOX1	RASSF4	1	-0.0352239930724067
AOX1	SMAD3	1	-0.0302477218760781
AOX1	SMARCD2	1	-0.0070006515127379
AOX1	VIT	1	-0.0826268355280393
AP000350.4	GSTT1	1	-0.0501801566244652
AP006621.5	KLC4	1	-0.00368681656056541
AP1B1	C1QC	1	-0.0343066867157821
AP1B1	CCNA2	1	0.0067566407777685895
AP1B1	CD4	1	-0.0633936009117868
AP1B1	CRYBB1	1	-0.0408995666709605
AP1B1	DOK2	1	-0.00398908793509108
AP1B1	FCGRT	1	-0.068025142264722
AP1B1	FUCA1	1	-0.0305752026536264
AP1B1	GFRA2	1	-0.0392658254591727
AP1B1	KCNQ1	1	-0.0865850332520706
AP1B1	MEF2C	1	-0.0811360470191437
AP1B1	MFSD1	1	-0.0390829465759675
AP1B1	MYO7A	1	-0.0969417276935839
AP1B1	NAGA	1	-0.0723790217796292
AP1B1	PARM1	1	-0.008929530298193291
AP1B1	PPT1	1	-0.0717765680968263
AP1B1	PTPN18	1	-0.0491472826647974
AP1B1	PYCARD	1	-0.021875793867011
AP1B1	SDPR	1	-0.004427139190259079
AP1B1	SLCO2B1	1	-0.069629183017793
AP1B1	TBXAS1	1	-0.0244416838594781
AP1M2	CCDC64B	1	-0.0329177781800926
AP1M2	DSP	1	-0.0216718910911984
AP1M2	EGFL6	1	-0.0544764557717475
AP2S1	MYL6	1	-0.0201409990532225
AP4B1	ODC1	1	-0.00934851338585899
APBA2	PRKCZ	1	-0.0558158138651123
APBA2	TFF3	1	-0.0856685023793829
APBB1	PINK1	1	-0.119640383408009
APBB1	PPAN	1	0.0024164649210364
APBB1IP	AR	1	-0.0014823506695965198
APBB1IP	ARHGAP20	1	-0.056993384662727006
APBB1IP	C19orf80	1	-0.043748925543201006
APBB1IP	EBF1	1	-0.0225659277449054
APBB1IP	EFNA5	1	-0.07366166257393598
APBB1IP	EHBP1	1	-0.11533580939596601
APBB1IP	GPAM	1	-0.0766009896599342
APBB1IP	SOS1	1	-0.0319432920392747
APBB1IP	SREBF1	1	-0.00832549253884252
APBB1IP	THRSP	1	-0.0247320646670198
APBB1IP	TPRG1	1	-0.0223303723927011
APBB1IP	ZNF438	1	-0.0431920848098296
APBB2	CCND1	1	-0.0763604902914053
APBB2	CD248	1	-0.0962138867222312
APBB2	FBXL7	1	-0.0655191777821245
APBB2	LAMA3	1	-0.0164314199114142
APBB2	MED13L	1	-0.0305063394486606
APBB2	NCOR2	1	-0.0206744674066119
APBB2	PARD3B	1	-0.0169265844246966
APBB2	PIK3R1	1	-0.0800458631876941
APBB2	PREX2	1	-0.0238179167330151
APBB2	PRKCE	1	-0.0156576809309749
APBB2	QKI	1	-0.01748451890241
APBB2	WASF3	1	-0.0060171244414230895
APBB3	CCS	1	-0.000175848153420605
APBB3	ENOSF1	1	-0.00942801291472233
APBB3	ZMIZ2	1	-0.00713727013652468
APLN	ENO2	1	-0.000110015321606946
APLN	PLOD1	1	-0.0186221068203903
APLN	PPP1R3G	1	-0.0413599689284261
APLN	ZNF395	1	-0.0784275565298811
APLNR	ECSCR	1	-0.0054064577439679
APLNR	PCDH12	1	-0.0582169446528769
APLNR	SH2D3C	1	-0.0163366924405455
APMAP	AQPEP	1	-0.0341966106911584
APMAP	CHKA	1	-0.038691471738559
APMAP	COX14	1	-0.0111943437797141
APMAP	DNAH9	1	-0.11594877737189999
APMAP	DTX1	1	-0.00276269500217876
APMAP	GLIS1	1	-0.0153841079565756
APMAP	GLYCTK	1	-0.100840284036431
APMAP	GPT2	1	-0.17541083252663697
APMAP	HADH	1	-0.0121095235394989
APMAP	HEPACAM	1	-0.0453184061481551
APMAP	HTRA1	1	0.0127550824525549
APMAP	LGALS12	1	-0.0451075875734548
APMAP	LRIG1	1	-0.0694326229537905
APMAP	MOGAT1	1	-0.0183971052695939
APMAP	ORMDL3	1	-0.00556013976599499
APMAP	PCK1	1	-0.0232852054938679
APMAP	PDE3B	1	-0.0610426915912136
APMAP	PDK2	1	-0.0573007981068006
APMAP	PLA2G16	1	-0.0104889899387792
APMAP	PNPLA2	1	-0.0280740403678972
APMAP	PTPRF	1	-0.0778367007834722
APMAP	RORC	1	-0.0351956259573791
APMAP	SLC7A4	1	0.00933815224351984
APMAP	TM7SF2	1	-0.088514374101498
APMAP	TMEM132C	1	-0.041423248858607
APMAP	TTC36	1	-0.0610249846593736
APMAP	USP30	1	-0.0232495151597084
APOA2	APOC3	1	-0.18605648252948803
APOBR	AQP9	1	-0.0493284463969752
APOBR	C12orf5	1	-0.0105330448855269
APOBR	C1orf228	1	-0.00767061811890077
APOBR	CCDC88A	1	-0.027204319436951
APOBR	CD300LB	1	-0.0686561265752835
APOBR	DCSTAMP	1	-0.0510817894188944
APOBR	DNASE2B	1	-0.00940993096916236
APOBR	FBP1	1	-0.0420976567634153
APOBR	FGR	1	-0.167984601553052
APOBR	GRN	1	-0.00927228616130091
APOBR	IFI30	1	-0.0441616014209245
APOBR	KCNAB2	1	-0.00506612738473952
APOBR	LAPTM5	1	-0.0256611828291956
APOBR	LCP1	1	-0.0287352350153706
APOBR	MATK	1	-0.00661379157991622
APOBR	NCEH1	1	-0.0493493776553676
APOBR	NCF2	1	-0.0864176536443303
APOBR	RPS6KA1	1	-0.0297284547954603
APOBR	SLC15A3	1	-0.0610676026053823
APOBR	TFEC	1	-0.0204774635884357
APOBR	TNFRSF11A	1	-0.00114275393501226
APOBR	TNNI2	1	-0.0098821129536364
APOBR	TREML1	1	-0.0200936494952589
APOBR	WDFY4	1	-0.0274595507411361
APOD	NGFR	1	-0.00315978812095796
APOLD1	BTG2	1	-0.0363275922995838
APOLD1	CCRL2	1	-0.0357163146074985
APOLD1	CDC42EP3	1	-0.00849074222189293
APOLD1	CLDN5	1	-0.104103230682169
APOLD1	CSRNP1	1	-0.0479750196971648
APOLD1	DLL1	1	-0.0717364540480077
APOLD1	DUSP1	1	-0.0287031986128827
APOLD1	EPB41L4A-AS2	1	-0.0042299483275756
APOLD1	INHBB	1	-0.0148221312571997
APOLD1	ITPRIP	1	-0.289347019382464
APOLD1	MTFP1	1	-0.12140455560294099
APOLD1	PELI1	1	-0.005615432696845529
APOLD1	S1PR1	1	-0.094479712722091
APOLD1	SIK1	1	-0.26976369976332
APOLD1	SOX17	1	-0.0667227728926528
APOLD1	SPRY1	1	-0.192265470397183
APOLD1	SPRY2	1	-0.0425222205773747
APOLD1	SRGN	1	-0.055343243567849004
APOLD1	TMCC3	1	-0.078999758678091
APOLD1	TSC22D1	1	-0.0484691396798037
APOLD1	TSPAN6	1	-0.00526753015110956
APP	CCDC85A	1	-0.027720081890702998
APP	CDH5	1	-0.169673836981457
APP	CLEC14A	1	-0.0073400098228824096
APP	DOCK9	1	-0.00716253934454537
APP	ELK3	1	-0.0630311285957396
APP	ELTD1	1	-0.0377074584685845
APP	ERG	1	-0.0454641859513163
APP	ESAM	1	-0.0134459512767741
APP	GLMN	1	0.0198448553983776
APP	GOLIM4	1	-0.0306237112227944
APP	HEG1	1	-0.0158926599925585
APP	HOXB7	1	-0.0279214624014854
APP	LNX1	1	-0.0153497643936066
APP	MEF2C	1	-0.00829093117647332
APP	MTPN	1	-0.0110169198053628
APP	POLR2A	1	-0.0166061042032077
APP	PRR12	1	-0.0115444923210089
APP	SF3A1	1	-0.0329257848430062
APP	SGK223	1	-0.00848531833480375
APP	SPARCL1	1	-0.0523902551200991
APP	STK40	1	0.0277839587824818
APP	TCF4	1	-0.0796073196525282
APP	TMEM123	1	-0.0612540363610572
APP	UTRN	1	-0.0873391340595966
APP	ZNF362	1	-0.0129055359083344
APPL2	COL1A2	1	-0.0384031347855489
APPL2	GLI3	1	-0.0123677858767963
APPL2	IL17RC	1	-0.000835066612341321
APPL2	MAP4K4	1	-0.00288055717369299
AQP5	ATP6V1B1	1	-0.0564232191047371
AQP5	C2orf82	1	-0.0864851283694033
AQP5	C5orf46	1	-0.14154681492289
AQP5	CCDC64B	1	-0.0807055512082796
AQP5	COL17A1	1	-0.0273085132162127
AQP5	DCD	1	-0.11072215484004101
AQP5	EPCAM	1	-0.0698896217251578
AQP5	FXYD3	1	-0.0101162908620424
AQP5	GJB6	1	-0.13508932759167
AQP5	GRB7	1	-0.0285587029389598
AQP5	HSD11B2	1	-0.080275180116379
AQP5	KIAA1324	1	-0.133784117003896
AQP5	KRT23	1	-0.17750209469641898
AQP5	KRT77	1	-0.0701872549954281
AQP5	MUCL1	1	-0.24461080916228897
AQP5	PADI2	1	-0.0450595460184844
AQP5	PIP	1	-0.22327087137861
AQP5	RHOV	1	-0.0803348171497409
AQP5	S100P	1	-0.0082268796516893
AQP5	SCGB2A2	1	-0.225528577643179
AQP5	SERPINB5	1	-0.0362627572288154
AQP5	SLC12A2	1	-0.0006806262874724281
AQP5	SPINT1	1	-0.0247162190718213
AQP5	TFAP2C	1	-0.00647053015619452
AQP5	ZNF750	1	-0.0333138042465206
AQP9	ASPHD1	1	-0.0179320152449576
AQP9	C19orf59	1	-0.11265810404931599
AQP9	CD300LB	1	-0.000648525743423389
AQP9	CD300LF	1	-0.12308199377271302
AQP9	CD52	1	-0.0291212999114792
AQP9	CD72	1	-0.000205993438342267
AQP9	CTSD	1	-0.0484113181836516
AQP9	CYP27A1	1	-0.0456341483573988
AQP9	DCSTAMP	1	-0.0668199455146025
AQP9	DOCK3	1	-0.0860827285756948
AQP9	FBP1	1	-0.0115959568681567
AQP9	FGR	1	-0.0653718257442103
AQP9	IL1RN	1	-0.054460571857247
AQP9	IL24	1	-0.0107005819791207
AQP9	KMO	1	-0.0504937921182774
AQP9	LIPA	1	-0.00880177151619182
AQP9	LTA4H	1	-0.0155196467408024
AQP9	METTL7B	1	-0.0406990780754888
AQP9	MNDA	1	-0.0128213595592751
AQP9	NLRC4	1	-0.0164960053693473
AQP9	PLA2G7	1	-0.00258703030588781
AQP9	RPS6KA1	1	-0.133209405860792
AQP9	SDS	1	-0.0384452457516908
AQP9	SLAMF9	1	-0.12570917969535
AQP9	ST14	1	-0.0364877785963348
AQP9	TREML1	1	-0.00519647701450377
AQPEP	CEPT1	1	-0.00581958020555794
AQPEP	COX14	1	-0.0161039031147886
AQPEP	DTX1	1	-0.0280412679375071
AQPEP	GABRE	1	-0.0670975684118774
AQPEP	GART	1	-0.0270020221665253
AQPEP	GLCCI1	1	-0.0463029130872191
AQPEP	KIAA0408	1	-0.0275158046277593
AQPEP	NHLRC3	1	-0.0585293341031898
AQPEP	PDE3B	1	-0.000594018790798203
AQPEP	PFKFB1	1	-0.0212993921078196
AQPEP	PLIN1	1	-0.0342052212496135
AQPEP	PNPLA2	1	-0.0165101946691476
AQPEP	PTPRF	1	-0.058308027083628
AQPEP	TLN2	1	-0.0047767302254560105
AR	BCL6	1	-0.0313406256182
AR	CXCL14	1	-0.00581904953093441
AR	GNAZ	1	0.0583029518835756
AR	LRP1	1	-0.0570028771664025
AR	MBNL3	1	-0.0460809378414422
AR	SLC7A6	1	-0.0363787990371453
AR	TPRG1	1	-0.00753867108839892
ARAP1	MYO9B	1	-0.00584132189581439
ARAP2	PTPRC	1	-0.0406646381712031
ARAP3	DCHS1	1	-0.000219441521491434
ARAP3	DOK4	1	-0.00430071094814903
ARAP3	FMNL3	1	-0.0433941137590904
ARAP3	TAL1	1	-0.0288152040053781
ARFGAP1	C10orf128	1	0.025908683607782
ARFGAP1	FAM193B	1	-0.132970213023204
ARFGAP1	PDE8A	1	-0.00458761431545997
ARG1	CSF3R	1	-0.00983332363481468
ARG1	IL18RAP	1	-0.00506153387578302
ARG1	LCN2	1	-0.043471804009190006
ARG1	MMP25	1	-0.0276126278831432
ARG1	S100A12	1	-0.24864107144004896
ARG1	S100A8	1	-0.00186260190928476
ARG1	SELL	1	-0.0524680299796212
ARG1	VNN2	1	-0.0499307152510371
ARGLU1	DDX17	1	-0.0278550476881143
ARGLU1	LUC7L3	1	-0.20701201180651602
ARGLU1	PNISR	1	-0.15965385368565801
ARGLU1	SRSF11	1	-0.0330186874329185
ARGLU1	ZFC3H1	1	-0.0980144323072744
ARGLU1	ZNF248	1	-0.0257957283955029
ARGLU1	ZNF574	1	0.00470253010991595
ARHGAP10	ARHGAP6	1	-0.0736023990400711
ARHGAP10	CLMN	1	-0.000480526223400725
ARHGAP10	CMTR2	1	0.00422757247036058
ARHGAP10	CUTC	1	-0.0320141484661053
ARHGAP10	DENND3	1	-0.00562739122585155
ARHGAP10	FMNL2	1	-0.0195930822940504
ARHGAP10	HSPB7	1	-0.0117429069000694
ARHGAP10	MBNL1	1	-0.0223512329650928
ARHGAP10	MKL1	1	-0.0316566412931579
ARHGAP10	NEXN	1	-0.083181011845892
ARHGAP10	PACSIN2	1	-0.22022413494194898
ARHGAP10	PALLD	1	-0.00628905513189987
ARHGAP10	PPP1CB	1	-0.048295036776162995
ARHGAP10	RANBP3L	1	-0.0649254636763231
ARHGAP10	RRAD	1	-0.0657278511011101
ARHGAP10	SH3RF1	1	-0.0243294702638009
ARHGAP10	SLC38A2	1	-0.0229631843114552
ARHGAP10	SLCO4A1	1	-0.0305209318976641
ARHGAP10	TLDC2	1	-0.0627950585983258
ARHGAP10	UNC119B	1	0.0412686894868093
ARHGAP12	FAM180A	1	-0.0425577185746542
ARHGAP12	GNRH1	1	-0.000197989386775154
ARHGAP12	PLSCR1	1	0.010918196608659001
ARHGAP12	RASA2	1	-0.0509265039106029
ARHGAP12	SF3A1	1	0.0539555678381979
ARHGAP12	TNRC6A	1	-0.09001908355552
ARHGAP18	CD4	1	-0.0648993621378062
ARHGAP18	F13A1	1	-0.033672774647878
ARHGAP19	DRP2	1	-0.027101920060659
ARHGAP19	FOXD3	1	-0.0355016719134736
ARHGAP19	PMP2	1	-0.0212289481035933
ARHGAP20	EHBP1	1	-0.0439599466176711
ARHGAP20	ZNF438	1	-0.00986094891980414
ARHGAP30	CARD9	1	-0.0570960688734946
ARHGAP30	CCR1	1	-0.0524266476777755
ARHGAP30	CD53	1	-0.0998889766243931
ARHGAP30	CPVL	1	-0.0028412073648035802
ARHGAP30	CRYBB1	1	-0.0176466551605259
ARHGAP30	CSF1R	1	-0.0123517633245883
ARHGAP30	CYBB	1	-0.0375031606614932
ARHGAP30	CYTH4	1	-0.000422013976936407
ARHGAP30	DOCK2	1	-0.0545887801234826
ARHGAP30	DOK2	1	-0.15521933272397598
ARHGAP30	DOK3	1	-0.0767746986193084
ARHGAP30	EDA2R	1	0.00805772693854379
ARHGAP30	EFHD2	1	-0.0147845107372538
ARHGAP30	FAM78A	1	-0.00976682554444858
ARHGAP30	FERMT3	1	-0.030354661605453997
ARHGAP30	GLIPR1	1	-0.0128387130889877
ARHGAP30	GPR34	1	-0.0218284326410321
ARHGAP30	GPR65	1	-0.10602905157046001
ARHGAP30	GPSM3	1	-0.0657060424736525
ARHGAP30	HCK	1	-0.0340253193060235
ARHGAP30	IKZF1	1	-0.0173183841643883
ARHGAP30	LCP1	1	-0.0124895360794564
ARHGAP30	LST1	1	-0.0393255273072071
ARHGAP30	MYO1F	1	-0.0249432353101217
ARHGAP30	NCKAP1L	1	-0.0118514011270488
ARHGAP30	NLRC4	1	-0.0126549453598317
ARHGAP30	NRROS	1	-0.0014627747209568199
ARHGAP30	PLCB2	1	-0.009235791824474059
ARHGAP30	PPT1	1	-0.007152080919337459
ARHGAP30	PRKCB	1	-0.0387362016719566
ARHGAP30	PTPN6	1	-0.127980771766586
ARHGAP30	PTPRC	1	-0.00533808431580013
ARHGAP30	SASH3	1	-0.153602846236241
ARHGAP30	SELPLG	1	-0.0450095427792101
ARHGAP30	SETD5	1	0.0208482363901217
ARHGAP30	SH3BP1	1	-0.00234350626996199
ARHGAP30	SNX20	1	-0.0129430131576872
ARHGAP30	SPI1	1	-0.0464191028629856
ARHGAP30	TLR8	1	-0.00478376543602554
ARHGAP30	VAMP8	1	-0.0587131237721629
ARHGAP30	WAS	1	-0.0324603638620358
ARHGAP30	WDFY4	1	-0.0389728222627927
ARHGAP31	BMPR2	1	-0.0202114827933668
ARHGAP31	CDH5	1	-0.0020829677846992602
ARHGAP31	CLK1	1	0.0544641019691621
ARHGAP31	CYYR1	1	-0.0537278973383836
ARHGAP31	EHD4	1	-0.053540145329612
ARHGAP31	ELFN1	1	-0.0653853259371247
ARHGAP31	ELK3	1	-0.00114382872198734
ARHGAP31	ETS1	1	-0.0406802301653738
ARHGAP31	FAM171A1	1	-0.0516451102453103
ARHGAP31	FLI1	1	-0.0454186830481006
ARHGAP31	GIMAP4	1	-0.00244840078803445
ARHGAP31	GIMAP6	1	-0.0434802786208759
ARHGAP31	GIPC2	1	-0.0458652645726216
ARHGAP31	GLMN	1	0.0247460576618133
ARHGAP31	HEG1	1	-0.18547951228889997
ARHGAP31	JAG2	1	-0.0174976934129696
ARHGAP31	LSR	1	-0.0161296919512139
ARHGAP31	MCC	1	-0.00674621558931078
ARHGAP31	MEOX1	1	-0.0058894200585762795
ARHGAP31	MIEF1	1	-0.0230497831354793
ARHGAP31	MON2	1	0.0147390859360696
ARHGAP31	PCDH1	1	-0.039935983779043
ARHGAP31	PPP1R13B	1	-0.0268936852164977
ARHGAP31	TEK	1	-0.0590530148328988
ARHGAP31	TNFRSF8	1	-0.0175287236661604
ARHGAP31	TSPAN7	1	-0.0929094672268241
ARHGAP31	UTRN	1	-0.0008800127481599939
ARHGAP31	ZNF248	1	0.0360315092374097
ARHGAP31	ZNF629	1	-0.00987793986992973
ARHGAP31	ZNF692	1	0.0295430803447456
ARHGAP32	CALD1	1	0.0184046617150546
ARHGAP32	MTMR3	1	-0.0870803132857729
ARHGAP32	SH3BGRL	1	0.00391117936750691
ARHGAP39	CADM4	1	-0.0285613228204133
ARHGAP39	COBL	1	-0.009011627203521859
ARHGAP39	EMILIN3	1	-0.0078121010493057705
ARHGAP39	FA2H	1	-0.0220434750340944
ARHGAP39	GRIK3	1	-0.0167747700047865
ARHGAP39	ITGB8	1	-0.00027685013966966
ARHGAP39	LMO7	1	-0.0476518073482116
ARHGAP39	RAP1GAP	1	-0.0256387719327699
ARHGAP39	SLC2A1	1	-0.0332614484917414
ARHGAP39	SOX8	1	-0.0779786186314875
ARHGAP4	C1QA	1	-0.0566584102907964
ARHGAP4	C1QB	1	-0.0301747339277299
ARHGAP4	CARD9	1	-0.00539330692229169
ARHGAP4	CCDC88B	1	-0.0616625036934133
ARHGAP4	CD163	1	-0.0110735735239964
ARHGAP4	CTTN	1	0.007051648618749391
ARHGAP4	CYBA	1	-0.0522601166255397
ARHGAP4	DEF6	1	-0.0821636998789923
ARHGAP4	DOCK2	1	-0.0724016129727678
ARHGAP4	DOK3	1	-0.0199326163081688
ARHGAP4	EBI3	1	-0.00734617839994098
ARHGAP4	EPAS1	1	-0.018309596674764998
ARHGAP4	HMHA1	1	-0.11427768368367099
ARHGAP4	IL10RA	1	-0.0212087302961787
ARHGAP4	LIMS2	1	-0.009420632128740109
ARHGAP4	NCF4	1	-0.0787715878155418
ARHGAP4	NPDC1	1	-0.0006970623823703769
ARHGAP4	PLCB2	1	-0.00689079691226969
ARHGAP4	PREX1	1	-0.0487387250146307
ARHGAP4	PRSS36	1	-0.0145178524688755
ARHGAP4	PYCARD	1	-0.0184580913977953
ARHGAP4	STAB1	1	-0.0969294804104628
ARHGAP4	STXBP2	1	-0.00768680060468514
ARHGAP4	TMC8	1	-0.00197265030327762
ARHGAP4	TRPM2	1	-0.0191243134891714
ARHGAP4	VSIG4	1	-0.0113827328774312
ARHGAP4	WAS	1	-0.0687555439774673
ARHGAP6	ARHGDIB	1	-0.0334152402619799
ARHGAP6	BMP2	1	-0.0291394617795109
ARHGAP6	CD4	1	-0.011871236597604999
ARHGAP6	CYP4B1	1	-0.0264928738149545
ARHGAP6	CYP4X1	1	-0.0305754768066853
[truncated: 41,594 more rows]

## Sheet: Adipose − Viscera
Name1	Name2	Edge type	Edge weight
A2M	ENDOD1	1	-0.0230706684356795
A2M	HDGFRP3	1	-0.0391847917872881
A2M	IGFBP7	1	-0.0531007320183904
A2M	NOTCH3	1	-0.0341586873937631
A2M	SERPING1	1	-0.0574359396305444
A2M	SPARCL1	1	-0.0466798148176219
AAAS	ABCC5	1	-0.0370351290922868
AAAS	CAPN3	1	-0.00351843587740265
AAAS	COG4	1	-0.0968253095522736
AAAS	ECHDC2	1	-0.0249287050720101
AAAS	HEMK1	1	-0.0847947783850818
AAAS	INTS3	1	-0.0736155163873971
AAAS	LENG8	1	-0.0167620889119869
AAAS	MYO15B	1	-0.00372278553083274
AAAS	PLA2G6	1	-0.0560991312692459
AAAS	SGK494	1	-0.0603663089967266
AAAS	SIDT2	1	-0.0145810445433825
AADAC	AADACL2	1	-0.0211098796593692
AADAC	LRRN4	1	-0.0081061128587531
AADAC	SLC28A3	1	-0.0180006222937446
AADACL2	BGN	1	0.0187284801712986
AADACL4	ALDH1A1	1	-0.0457993683833452
AADACL4	CBLN4	1	-0.0975913253241898
AARS	HERPUD1	1	-0.157036031961323
AARS	IARS	1	-0.0854069003659439
AARS	MARS	1	-0.122482604816
AARS	PYCR1	1	-0.00694969754767096
AARS	SHMT2	1	-0.00395453796138724
AARS	SLC1A4	1	-0.0129705796971547
AARS	YARS	1	-0.16914069454165698
AATK	MPZ	1	-0.13279070558758502
AATK	P2RX1	1	-0.011241074640368
AATK	PLP1	1	-0.121185486706856
AATK	SFRP5	1	-0.045799074082084994
AATK	SOX10	1	-0.0973359602551495
ABAT	C5	1	-0.0677532361035521
ABAT	CBS	1	-0.0845748286901062
ABAT	CDO1	1	-0.0253573972000463
ABAT	DCXR	1	-0.042730173756606
ABAT	FABP4	1	0.0132719846546591
ABAT	FADD	1	0.0280410120638378
ABAT	GCDH	1	-0.0970008330613862
ABAT	HRSP12	1	-0.0912466670468732
ABAT	HSD17B10	1	-0.00302068386859132
ABAT	INF2	1	0.00437913614876587
ABAT	KIFC3	1	0.0419047119189318
ABAT	PCYT2	1	-0.0660686820483616
ABAT	PXMP2	1	-0.0270678747596045
ABAT	SLC19A2	1	-0.00179138530158196
ABAT	SLC7A4	1	0.0351478973313635
ABAT	SPHK2	1	-0.016965089099818
ABAT	TMEM102	1	0.0161022089585097
ABAT	USP15	1	-0.00821851728417063
ABCA1	IKBKE	1	0.022294176295784
ABCA1	SQLE	1	0.0371227148127503
ABCA1	ZNF395	1	-0.0414119254264069
ABCA2	DGAT1	1	-0.0610206093099954
ABCA2	EPHX2	1	-0.0625817160624289
ABCA2	GABBR1	1	-0.008818751473315891
ABCA5	CRABP2	1	0.000793747466522419
ABCA5	JAK2	1	-0.0227538157212127
ABCA5	NR3C1	1	0.0453732880118018
ABCA5	RASSF4	1	-0.0031979344357018
ABCA6	ATP2B4	1	0.028991261918538
ABCA6	CAB39L	1	-0.0482315005886228
ABCA6	CBX4	1	0.0151667000466954
ABCA6	CCDC85C	1	0.004270493404431639
ABCA6	CDK6	1	0.0119120139844496
ABCA6	DEF6	1	0.0140419466657682
ABCA6	EFHD1	1	-0.00693257958585558
ABCA6	FIBIN	1	-0.0125504306215368
ABCA6	FMNL1	1	0.0019390960670242802
ABCA6	MAL2	1	0.0141577293902109
ABCA6	MOB3B	1	-0.0647626792159817
ABCA6	NOTCH1	1	0.0155715087204283
ABCA6	RAI2	1	-0.0133783911872974
ABCA6	RNF146	1	-0.0263527987793489
ABCA6	SESN1	1	-0.0240411166079802
ABCA6	SLC9A3R1	1	0.0887854727610796
ABCA6	TMEM86A	1	-0.0196598813801685
ABCA6	WDR81	1	-0.0706499167243401
ABCA6	YPEL4	1	-0.0041583461132075105
ABCA7	DGAT1	1	-0.0101077230288208
ABCA7	MMP15	1	-0.0276675359557612
ABCA8	C1S	1	-0.0297833788316164
ABCA8	DCLK1	1	-0.0125171418368816
ABCA8	FBLN5	1	-0.00415243541797456
ABCA8	FBN1	1	-0.0563366385310149
ABCA8	LTBP4	1	-0.0186480512497597
ABCA8	MARCH3	1	-0.0135251421412469
ABCA8	PAMR1	1	-0.0471638564115277
ABCA8	PDGFRL	1	-0.0139253044645168
ABCA8	PLA2G5	1	-0.00942937483187577
ABCA8	SCARA5	1	-0.0314369663534216
ABCA8	SLC9A9	1	-0.10825697129378499
ABCB1	CYYR1	1	-0.00680549380875554
ABCB1	EMCN	1	-0.0775422007508605
ABCB1	MYCT1	1	-0.0243896396127558
ABCB1	RUNDC3B	1	-0.125175209087373
ABCB1	SELP	1	-0.0617727979087315
ABCB1	SLC52A3	1	-0.0182438974449848
ABCB1	SLCO2A1	1	-0.0338343838922748
ABCB1	TM4SF18	1	-0.0280481200575479
ABCB6	ENO1	1	-0.0358719786197317
ABCB6	GYS1	1	-0.09218996088687699
ABCB6	HSD17B4	1	-0.0145344648322731
ABCB6	NFIB	1	-0.0679434534283098
ABCB6	PLOD1	1	-0.0213488670122961
ABCB8	ADPRM	1	0.0766803460744298
ABCB8	CCNI	1	0.0351881502240931
ABCB8	CEP164	1	-0.0234593077132732
ABCB8	DRAM2	1	0.0230965331910941
ABCB8	EIF4EBP3	1	0.0538652901523651
ABCB8	FASTK	1	-0.03967550589808
ABCB8	ISOC2	1	-0.0398765049711405
ABCB8	KAT2A	1	-0.037303846304387
ABCB8	LZTR1	1	-0.0138155845957886
ABCB8	NENF	1	0.0446414186780268
ABCB8	NUDT8	1	-0.0017193483859376099
ABCB8	S100A13	1	0.0670233280576059
ABCB8	ZNF581	1	0.126694028426124
ABCC5	ACIN1	1	-0.0789154071352282
ABCC5	CNPY3	1	-0.0578960029498508
ABCC5	GNPDA1	1	-0.00385105627544272
ABCC5	INTS3	1	-0.0532406250361302
ABCC5	KAT2A	1	-0.0536846818216916
ABCC5	NPL	1	-0.130573736719103
ABCC5	PLA2G6	1	-0.0370906475995785
ABCC5	RPS6KA2	1	0.0111487596784891
ABCC5	SDCBP2	1	0.0348322735704385
ABCC5	SLC16A11	1	0.012461598681986
ABCC5	SLC23A3	1	-0.0260529689044482
ABCC5	TTC18	1	-0.00603516904093799
ABCC5	ZMAT1	1	-0.00156611325485211
ABCC8	FIGF	1	-0.0114760789934384
ABCD2	ACSL1	1	-0.00295902928655716
ABCD2	C19orf80	1	-0.0360515558826127
ABCD2	CDO1	1	-0.0361005976283345
ABCD2	DGAT1	1	-0.0562140240296249
ABCD2	GYS2	1	-0.00232036689892663
ABCD2	KLHDC8B	1	-0.000612658513470192
ABCD2	KLHL31	1	-0.0362807530210472
ABCD2	LDHB	1	-0.0666014673032861
ABCD4	CDK2	1	-0.0054172533810986
ABCD4	CMIP	1	-0.0587266830192281
ABCD4	DARC	1	-0.0295661491986798
ABCD4	ETS2	1	-0.0271184140032227
ABCD4	FAM110D	1	-0.0130234234089219
ABCD4	HIPK3	1	-0.0053497977475524
ABCD4	IFI16	1	-0.0156728264981616
ABCD4	IFT140	1	-0.00163174605024452
ABCD4	LPCAT4	1	-0.0024607132517153896
ABCD4	MINK1	1	-0.0107069141658443
ABCD4	MKL2	1	-0.024988575752098
ABCD4	PLSCR4	1	-0.009601676838348021
ABCD4	RELL1	1	-0.101770005086856
ABCD4	SBNO2	1	-0.039357062690903
ABCD4	SH2B2	1	-0.00323082727108707
ABCD4	SPNS2	1	-0.00158176371263602
ABCD4	TACR1	1	-0.0802693597938951
ABCD4	TIAM1	1	-0.0138357127737265
ABCD4	TLL1	1	-0.0561445649353901
ABCD4	TMEM255B	1	-0.15963722744321804
ABCD4	TRAT1	1	0.0394104435449603
ABCD4	UGCG	1	-0.0280259181005204
ABCD4	ZNF385D	1	-0.10858019577721302
ABCG1	AKAP12	1	-0.0148860095121481
ABCG1	CETP	1	-0.0197485087633491
ABCG1	EGLN3	1	-0.0391521434256613
ABCG1	MLLT4	1	-0.0211284196700858
ABCG1	MTFP1	1	-0.0158716016685529
ABCG1	SLCO4A1	1	-0.0283620849473331
ABCG1	SREBF1	1	-0.0732121205545262
ABCG1	TMEM63A	1	-0.00687122487116991
ABCG2	EHD4	1	-0.00193121477952943
ABCG2	FAT1	1	0.0243508647689578
ABCG2	IGFBP2	1	-0.0219054853523592
ABCG2	LHX6	1	-0.0118729171905436
ABCG2	LIFR	1	-0.0925112964206599
ABCG2	MYO5C	1	-0.110011008183013
ABCG2	NUDCD1	1	-0.008848603308321509
ABCG2	PTPRB	1	-0.05131602166077401
ABCG2	RUNDC3B	1	-0.0530084782558863
ABCG2	SDPR	1	-0.00134960762762606
ABCG2	TSPAN7	1	-0.0019085772823556198
ABHD1	AC062017.1	1	-0.0264797646094517
ABHD1	C1orf213	1	-0.0432017394689497
ABHD1	DPRX	1	-0.0210822456450409
ABHD1	GPX3	1	0.0298364396253606
ABHD1	SELENBP1	1	-0.00395772235012487
ABHD1	YBX2	1	-0.0129951511688648
ABHD1	YWHAG	1	-0.00954269056615328
ABHD10	BSDC1	1	0.0456609425034731
ABHD10	SGSM2	1	0.0389122664286583
ABHD14A	ASIC1	1	-0.0423803956983023
ABHD14A	CALCOCO1	1	0.00878175654543561
ABHD14A	CMAS	1	0.0147199718695709
ABHD14A	CNTNAP1	1	-0.0156683631909285
ABHD14A	ECHS1	1	-0.0450261867012803
ABHD14A	NDN	1	-0.00653225727737204
ABHD14A	OLFML1	1	-0.0208754360717597
ABHD14A	PCOLCE	1	-0.089462721546301
ABHD14A	PRTFDC1	1	-0.0239379391350301
ABHD14A	PYCR1	1	-0.0271841788507818
ABHD14A	RNLS	1	-0.000398804943533049
ABHD14A	SELENBP1	1	-0.0502199479564146
ABHD14A	YBX2	1	-0.0266830690411491
ABHD14A	ZNF423	1	-0.0156969688489566
ABHD17C	ELFN1	1	-0.0317255837167756
ABHD3	DNASE1L2	1	-0.0596690060363911
ABHD3	GPBP1	1	-0.0156706384204088
ABHD3	IGFLR1	1	-0.0131427267285248
ABHD3	ITGB5	1	0.044379666160967994
ABHD3	LY96	1	-0.0107223473429272
ABHD3	MAPK3	1	0.0160360360395694
ABHD3	MGAT4B	1	0.0220326311421007
ABHD3	NFATC1	1	-0.013380547176937
ABHD3	PCBD1	1	-0.0352900712961729
ABHD3	PHKA2	1	-0.0553187204589093
ABHD3	QDPR	1	-0.0551872480876566
ABHD3	SDCBP2	1	0.0314011579735141
ABHD3	THAP2	1	-0.08745848767666399
ABHD3	TNFAIP6	1	-0.00226790402354909
ABHD3	TRAF1	1	-0.0807419012516879
ABHD3	TSKS	1	-0.0320475406216636
ABHD3	YJEFN3	1	-0.00704900696723031
ABHD3	ZMAT1	1	-0.0868212457348131
ABHD4	ALG6	1	0.0063217349925072
ABHD4	AP4B1	1	0.0195940609006808
ABHD4	BSDC1	1	-0.0162685411033778
ABHD4	C11orf68	1	-0.0711717314635215
ABHD4	CALCOCO1	1	-0.0512151584604356
ABHD4	FYCO1	1	-0.0121657040042971
ABHD4	GAB2	1	-0.0279879195049659
ABHD4	MMP14	1	-0.00585824522563415
ABHD4	MYL9	1	-0.0387073397731322
ABHD4	SQSTM1	1	-0.0815457259587819
ABHD4	VAT1	1	-0.0223879523035568
ABHD5	ANKRD53	1	-0.0733703495847815
ABHD5	BCL2	1	-0.0451932111974954
ABHD5	CTNNAL1	1	-0.00372845012056637
ABHD5	EPB41L4B	1	-0.21971332401173302
ABHD5	FABP4	1	-0.0489048434127556
ABHD5	KIAA1239	1	-0.0606386950717288
ABHD5	LNPEP	1	-0.0101788601849025
ABHD5	ORMDL3	1	-0.00808354065604889
ABHD5	PDE1B	1	-0.0054789065258614295
ABHD5	PHLDA3	1	-0.0179707050928573
ABHD5	PLAGL1	1	-0.0167078212865351
ABHD5	SESTD1	1	-0.0161984813356425
ABHD5	SREBF1	1	0.0326879711871272
ABHD8	BAD	1	-0.0769664094685359
ABHD8	PELI3	1	-0.0374167680266984
ABHD8	TMEM240	1	-0.0036394679637587204
ABI3	ARHGAP31	1	-0.0229092659786936
ABI3	CCM2L	1	-0.0369358408061056
ABI3	HECW2	1	-0.0128889226779313
ABI3	JAG2	1	-0.0628324560504883
ABI3	MAN2A1	1	0.0084833972670102
ABI3	PPP1R13B	1	-0.0329530591927602
ABI3	SLC9A3R2	1	-0.0480794403474926
ABI3	SOX18	1	-0.0474374844275309
ABI3BP	DCN	1	-0.0742417652324808
ABI3BP	F10	1	-0.0176672465217696
ABI3BP	LTBP1	1	-0.0233826695359523
ABI3BP	PAM	1	-0.00419296565616191
ABI3BP	PRRX2	1	-0.0076420093513928904
ABL1	ACKR3	1	-0.0195441198169818
ABL1	B4GALT1	1	-0.0143351278327015
ABL1	BDKRB1	1	-0.0005489047385370259
ABL1	COL6A2	1	-0.0136772205285452
ABL1	ELL	1	-0.0363123805273323
ABL1	FGFR1	1	-0.0074579002370677204
ABL1	GFPT2	1	-0.0371745682066325
ABL1	HDAC5	1	-0.0510210053548812
ABL1	HIC1	1	-0.0494647782850399
ABL1	METRNL	1	-0.06500863887429
ABL1	MNT	1	-0.0107838448250495
ABL1	PDE4D	1	-0.036825715290455
ABL1	PRRX2	1	-0.0272893811503717
ABL1	S1PR2	1	-0.00701427079226227
ABL1	SH3PXD2A	1	-0.08506225193424902
ABL1	SMAD3	1	-0.0708671444720121
ABL1	SMG6	1	-0.0649158389949114
ABL1	SNX21	1	-0.11776550096120099
ABL1	SNX33	1	-0.0140951041947367
ABL1	THBS2	1	-0.0334685001096192
ABL1	ZBTB4	1	-0.0740942233857631
ABLIM1	AKT3	1	-0.0307568909319109
ABLIM1	ANKS1A	1	-0.0114034328422862
ABLIM1	BACE2	1	-0.00312295996299308
ABLIM1	EGFR	1	-0.00595421280670538
ABLIM1	FAM46C	1	0.00616224223156185
ABLIM1	FBXO31	1	-0.0498910992928973
ABLIM1	GALNT18	1	-0.00960119659397931
ABLIM1	GPR133	1	-0.0735022870638874
ABLIM1	LIMD2	1	0.0146959001906958
ABLIM1	MTUS1	1	-0.07857398052922
ABLIM1	PHC2	1	-0.00377362359127709
ABLIM1	PTTG1IP	1	-0.0832643646793205
ABLIM1	PXN	1	-0.14308678101381
ABLIM1	ZNF224	1	-0.0255515603050851
ABLIM3	ADAMTS18	1	-0.0005531544129959151
ABLIM3	ARHGEF7	1	-0.0885169079179412
ABLIM3	CADM2	1	-0.03493815555668899
ABLIM3	CC2D1A	1	-0.0026627375667695897
ABLIM3	CDH5	1	-0.0141903142519591
ABLIM3	CTNNBIP1	1	-0.026654695268334
ABLIM3	DCBLD1	1	-0.0315499397444444
ABLIM3	GNAZ	1	-0.0258905273504864
ABLIM3	GPBP1	1	0.00976650648025778
ABLIM3	ITGA6	1	-0.0179303554572266
ABLIM3	KIAA1217	1	-0.107727406520955
ABLIM3	LRCH1	1	-0.0846254098099749
ABLIM3	MADD	1	-0.0349429196173077
ABLIM3	MCF2L	1	-0.20187585542518602
ABLIM3	MFSD6	1	-0.0263342241573633
ABLIM3	NEURL1B	1	-0.00978257988296932
ABLIM3	NKTR	1	-0.0248293803712002
ABLIM3	NOTCH4	1	-0.0156726809006703
ABLIM3	PDE2A	1	-0.102267712115115
ABLIM3	PEAR1	1	-0.0487916650296928
ABLIM3	PKP1	1	-0.0123469248433216
ABLIM3	PML	1	-0.15996126388430898
ABLIM3	PPP1R16B	1	-0.038151255290757004
ABLIM3	RAPGEF5	1	-0.0614294426639478
ABLIM3	SHANK3	1	-0.21999007858646602
ABLIM3	ST6GALNAC3	1	-0.0900321281726562
ABLIM3	TAF1C	1	-0.0172791359294718
ABLIM3	TAOK2	1	-0.0532894157143395
ABLIM3	TBCD	1	-0.0154279319171538
ABLIM3	TCF4	1	-0.0284523505049683
ABLIM3	TSPAN13	1	-0.047696126394656
ABRACL	ARHGAP4	1	-0.0108953542984087
ABRACL	ARL6IP6	1	-0.0119281756327504
ABRACL	ELFN1	1	-0.0505528313353124
ABRACL	WAC	1	0.0497844258450108
ABTB1	ARG1	1	-0.0277884842916415
ABTB1	CREBRF	1	-0.0545186174189439
ABTB1	CSF3R	1	-0.00552038185059245
ABTB1	HAL	1	-0.0851091504665429
ABTB1	HRH2	1	-0.0301379093571894
ABTB1	LRRK2	1	-0.006284955246873079
ABTB1	MTMR3	1	-0.0603751643915015
ABTB1	MXD1	1	-0.00194590586356214
ABTB1	PADI2	1	-0.0319698124378236
ABTB1	PHF21A	1	-0.0349179009537258
ABTB1	PPP4R1L	1	-0.0381876684316316
ABTB1	SLC12A6	1	-0.06504347373934
ABTB1	SORL1	1	-0.00869237567095793
ABTB1	TCP11L2	1	-0.0546197534397195
ABTB1	ULK1	1	-0.0701638102821686
ABTB1	VNN1	1	-0.00889059996088179
ABTB1	WDR48	1	-0.0395907066185185
ABTB2	FST	1	-0.0347933261945792
ABTB2	HIVEP2	1	-0.0117255031033465
ABTB2	NFKB1	1	-0.00795927214612272
AC004381.6	ACSM3	1	-0.0229628943406026
AC062017.1	ANKRD24	1	-0.0182196433442954
AC062017.1	C1orf213	1	-0.13583482575381198
AC131097.4	C12orf39	1	-0.0132010237640412
AC131097.4	ECHS1	1	-0.0423313651766856
AC131097.4	ME1	1	-0.00286066774835699
AC131097.4	NXPH4	1	-0.046976388140960994
AC131097.4	THRSP	1	-0.105667475705948
AC139100.2	DNAJB4	1	-0.007422408348337509
AC139100.2	HSPH1	1	-0.0102153820880184
ACACA	ACLY	1	-0.184851127414353
ACACA	ACSL1	1	-0.0279327979980243
ACACA	ADIPOR2	1	-0.11107139474646101
ACACA	CKMT2	1	-0.0300029687029877
ACACA	DBI	1	-0.0342709927818377
ACACA	DHCR7	1	-0.00450203989524067
ACACA	EBP	1	-0.0694599217078408
ACACA	ECHS1	1	-0.0465560562400472
ACACA	ELOVL5	1	-0.0755526026452309
ACACA	FAM166B	1	-0.14033566005193698
ACACA	FCN2	1	-0.0772381244912067
ACACA	GPAM	1	-0.0741397534768001
ACACA	INSIG1	1	-0.0634033634325613
ACACA	KCNE1	1	-0.0269692595417471
ACACA	MAP2K6	1	-0.079989570669645
ACACA	ME1	1	-0.20910126047080102
ACACA	MID1IP1	1	-0.039597775825498005
ACACA	MME	1	-0.05907945223355401
ACACA	MMP17	1	-0.0464111199751332
ACACA	MVK	1	-0.007271673337227209
ACACA	NKD2	1	-0.015232899347432
ACACA	NUDT8	1	-0.007483777892924509
ACACA	NXPH4	1	-0.0223738338633069
ACACA	PHPT1	1	-0.0845661749232442
ACACA	POLD2	1	-0.0716555328529944
ACACA	PRRT4	1	-0.05086414949
ACACA	SLC16A7	1	-0.00170179789522995
ACACA	SLC19A1	1	-0.0143057596964163
ACACA	TF	1	-0.0333311010348141
ACACA	THRSP	1	-0.0217841515411713
ACACA	WNT3	1	-0.00223955395141063
ACAD10	CDKN1A	1	-0.008177576076027029
ACAD10	FOSL2	1	-0.0591944814454351
ACAD10	GPT	1	-0.0115329406921808
ACAD10	NSUN6	1	-0.0355140558319197
ACAD10	RECQL5	1	-0.0243712510725883
ACAD10	ZNF358	1	0.00697333315034679
ACAD11	PNISR	1	-0.00165387907083306
ACADM	BCKDHA	1	-0.0027967532460739697
ACADM	DLD	1	-0.132043053836146
ACADM	ECHS1	1	-0.00870385862833056
ACADM	ETFA	1	-0.00259206384102163
ACADM	HIBADH	1	-0.0939374307973215
ACADM	LDHD	1	-0.0116033788604824
ACADM	PCCB	1	-0.0818829107538556
ACADM	PLA2G15	1	0.0281195734271558
ACADM	PXMP2	1	-0.0142699545988224
ACADM	SDHB	1	-0.0118191744777165
ACADS	ALDH1L1	1	-0.0350320184222535
ACADS	ECHS1	1	-0.0317630531885424
ACADS	GCHFR	1	-0.0612446623886237
ACADS	GPT	1	-0.0084387789301929
ACADS	HADH	1	-0.14268793960096499
ACADS	LDHD	1	-0.0214340146539698
ACADS	PC	1	-0.0987590773653438
ACADS	TM7SF2	1	-0.0239913324676148
ACADVL	ACSF2	1	-0.00303757607264348
ACADVL	CTSD	1	-0.0477673423557863
ACADVL	FABP4	1	-0.0852339337436362
ACADVL	ILVBL	1	-0.0156696634341571
ACADVL	SLC27A3	1	-0.000993769356541198
ACAP1	ARHGAP9	1	-0.0184382996942303
ACAP1	ATP2A3	1	-0.0789770229950641
ACAP1	C1QC	1	0.00843896627185209
ACAP1	CD48	1	-0.0054894364841158
ACAP1	CST7	1	-0.0237592508837902
ACAP1	CXCR4	1	-0.0130914642230516
ACAP1	CYTIP	1	-0.0199094544726695
ACAP1	DENND1C	1	-0.113242315091285
ACAP1	EIF4E3	1	-0.00614685986163926
ACAP1	GPR174	1	-0.0333372100818759
ACAP1	MYO1G	1	-0.0492903117277227
ACAP1	PRKCB	1	-0.0456206203866918
ACAP1	RLTPR	1	-0.0474173127742042
ACAP1	SCML4	1	-0.0713372470701518
ACAP1	SEMA4D	1	-0.0364318938457148
ACAP1	TBC1D10C	1	-0.134488740266574
ACAP1	TRAF3IP3	1	-0.0990902182082836
ACAP1	ZAP70	1	-0.0073820044938851
ACAP3	ARAP1	1	-0.0110508159271995
ACAP3	ARHGEF40	1	-0.0594843871080276
ACAP3	CIRBP	1	0.0804040052254924
ACAP3	DENND4B	1	-0.0136681263475344
ACAP3	EPS8L2	1	-0.0621113436904125
ACAP3	HELQ	1	0.0128322881205993
ACAP3	MXI1	1	0.0118363306649369
ACAP3	RNF103	1	0.00267782550378799
ACAP3	RPS5	1	0.0206747935525404
ACAP3	RUSC1	1	-0.03573991664209299
ACAP3	SMPD3	1	-0.0702346243635372
ACAP3	TCIRG1	1	-0.0170941243977947
ACAP3	TTYH3	1	-0.0284743415521513
ACD	SIK1	1	-0.007718103637265421
ACE2	ACSL5	1	-0.0311587976750561
ACE2	AIF1L	1	-0.0418965614277764
ACE2	C1orf162	1	-0.06217576531965701
ACE2	CNR1	1	-0.0020063961577303
ACE2	IGFBP5	1	-0.0642871636845791
ACE2	NID1	1	-0.10416484353881501
ACE2	PROK1	1	-0.00616531827607972
ACE2	PTPN18	1	-0.00814056897692714
ACE2	RARRES2	1	0.00035317254813524104
ACE2	RGL3	1	-0.0783493312550533
ACE2	SLC7A8	1	-0.0446240029710376
ACE2	SYNE2	1	-0.020702852398716
ACE2	TIMP3	1	-0.0445435769379337
ACIN1	RBM5	1	-0.12872683653597197
ACIN1	STAT6	1	-0.0523924274689396
ACIN1	STK36	1	-0.0167550307664717
ACIN1	TP53BP1	1	-0.0645960420599752
ACIN1	TSC1	1	-0.00218587532883847
ACIN1	ZSWIM8	1	-0.0765330743210297
ACKR3	ARHGEF10L	1	-0.0554258234761495
ACKR3	FBN1	1	-0.0721649056032186
ACKR3	HMCN2	1	-0.0148599454906369
ACKR3	HSF4	1	-0.0319265902982944
ACKR3	HTRA3	1	-0.0851387614206592
ACKR3	METRNL	1	-0.171611163782867
ACKR3	NDRG1	1	-0.0031704201970150603
ACKR3	NR2F1	1	0.0123535565057099
ACKR3	PDE4D	1	-0.0181457546702003
ACKR3	PRRX2	1	-0.0370591407356032
ACKR3	RFXAP	1	0.00784561743631239
ACKR3	SCARA5	1	-0.0045130840506008105
ACKR3	SDK1	1	-0.0224313985667338
ACKR3	TPCN1	1	-0.0063306551918308395
ACLY	ACSS2	1	-0.101070350482987
ACLY	ADIPOR2	1	-0.20188402313756698
ACLY	AGT	1	-0.00384170716460043
ACLY	ARHGEF16	1	-0.14684978548066502
ACLY	C19orf80	1	-0.0893689311033651
ACLY	CAMTA2	1	-0.0176886222792928
ACLY	CHD1L	1	-0.0331510673166876
ACLY	DBI	1	-0.0197800735216847
ACLY	DHCR7	1	-0.115892738726105
ACLY	DLAT	1	-0.10822674782137401
ACLY	EBP	1	-0.0433448251684647
ACLY	FADS2	1	-0.0493335690186091
ACLY	FAM166B	1	-0.144991741819489
ACLY	INSIG1	1	-0.0481754108711754
ACLY	IP6K3	1	-0.0525870969687239
ACLY	KCNE1	1	-0.0865456075252343
ACLY	ME1	1	-0.124787232306921
ACLY	MID1IP1	1	-0.09311294727687199
ACLY	MMP17	1	-0.0786692010513477
ACLY	MVD	1	-0.17805298969921998
ACLY	NSDHL	1	-0.0324465259603491
ACLY	NXPH4	1	-0.000396551503134668
ACLY	OLFM2	1	-0.118792751397596
ACLY	PGP	1	-0.0686293644758695
ACLY	PRRT4	1	-0.0291143716824363
ACLY	RMDN3	1	-0.0691496803498294
ACLY	SLC19A1	1	-0.0904762444326749
ACLY	SLC25A22	1	-0.0545369738681998
ACLY	SLC29A2	1	-0.0234905009758412
ACLY	STK39	1	-0.0034572457389420103
ACLY	TESK1	1	-0.0465680062894058
ACLY	THRSP	1	-0.0636810475288988
ACLY	TNK2	1	-0.0514227745636714
ACP5	CD52	1	-0.0228753719585583
ACP5	CD86	1	-0.0017682718186747
ACP5	CLEC10A	1	-0.0173146171751329
ACP5	CTSD	1	-0.00487852512374075
ACP5	CYP27A1	1	-0.000643322631518322
ACP5	DCSTAMP	1	-0.000170290277183793
ACP5	DHRS9	1	-0.0782142438009755
ACP5	FCGRT	1	-0.0483675047456136
ACP5	FUCA1	1	-0.11668267287615501
ACP5	GRN	1	-0.0350059993031516
ACP5	HEBP1	1	-0.0273548282749134
ACP5	HPGDS	1	-0.0323684426321822
ACP5	HSD17B14	1	-0.0197684399135237
ACP5	IFI30	1	-0.0610220796277606
ACP5	IGSF6	1	-0.0036128633916045296
ACP5	IQGAP2	1	-0.10942208384751399
ACP5	NPC2	1	-0.0711263047005605
ACP5	NPL	1	-0.0646072695724494
ACP5	PLA2G7	1	-0.135617528309865
ACP5	PLD3	1	-0.0019004307868262101
ACP5	SIGLEC1	1	-0.0320499630982291
ACP5	TFEC	1	-0.0494595179405256
ACP5	TPP1	1	-0.0426628081493742
ACRBP	CD86	1	-0.00288309887847508
ACRBP	IL10RA	1	-0.0157472626383583
ACRBP	SLC23A3	1	-0.0274939861054856
ACSL1	ACSS2	1	-0.00426501210689304
ACSL1	ADIPOR2	1	-0.00407998637785067
ACSL1	AGPAT2	1	-0.0238467427338972
ACSL1	C19orf80	1	-0.0154484358217996
ACSL1	CDO1	1	-0.10454184947878
ACSL1	CHCHD10	1	-0.0575152866952919
ACSL1	CLMN	1	-0.0455993797671811
ACSL1	CYB5A	1	-0.05704381282873999
ACSL1	DCXR	1	-0.0148499866555243
ACSL1	DGAT1	1	-0.0387974826201585
ACSL1	DGAT2	1	-0.109640150921092
ACSL1	ECHS1	1	-0.126825858486932
ACSL1	ELOVL5	1	-0.0308686089666558
ACSL1	FAM166B	1	-0.00108669793756927
ACSL1	GPAM	1	-0.0681224461529537
ACSL1	GYS1	1	-0.0199002604790776
ACSL1	IRAK3	1	-0.00958471502674402
ACSL1	ITGB5	1	0.0195468403673491
ACSL1	LDHD	1	-0.0119804980564903
ACSL1	LGALS12	1	-0.00822037565536732
ACSL1	LPL	1	-0.0177450271988591
ACSL1	LRIG1	1	-0.007700675793097671
ACSL1	MME	1	-0.12069794454820099
ACSL1	MOGAT1	1	-0.0980225185206695
ACSL1	PC	1	-0.0260493519404073
ACSL1	PLA2G15	1	0.0050258508683724105
ACSL1	PRRT4	1	-0.0992306437777695
ACSL1	RNF175	1	-0.0695418090175264
ACSL1	VAT1	1	0.0045862314760761105
ACSL5	MEOX2	1	-0.0424233689497128
ACSL5	NOSTRIN	1	-0.0673522966684174
ACSL5	PLA1A	1	-0.0869373603264463
ACSL5	PREX1	1	-0.00807085293363032
ACSL5	SH3BGR	1	0.00477773321510011
ACSM3	C1QL1	1	-0.00164547640410511
ACSM3	DPYS	1	-0.0247007933516625
ACSM3	GMPR	1	-0.0076924672508653
ACSM3	MUM1L1	1	-0.0821123030753389
ACSM3	RBM47	1	0.00615920080590212
ACSM3	SNCAIP	1	-0.0402265124913251
ACSS2	ARHGEF16	1	-0.0267382805296607
ACSS2	CLPB	1	-0.00246338489931716
ACSS2	CYB5A	1	-0.0144320978473104
ACSS2	DBI	1	-0.00134612377468956
ACSS2	DGAT1	1	-0.026259082440956
ACSS2	EBP	1	-0.0124613555417549
ACSS2	ECHS1	1	-0.0247533098349084
ACSS2	ELOVL5	1	-0.0228937706829259
ACSS2	FCN2	1	-0.0133584013851212
ACSS2	GPAM	1	-0.0122597593544336
ACSS2	INSIG1	1	-0.0405717309212441
ACSS2	LDHD	1	-0.0027916924182524398
ACSS2	LGALS12	1	-0.0589314244491652
ACSS2	ME1	1	-0.0467348477798444
ACSS2	NT5C	1	0.0491852217601054
ACSS2	PC	1	-0.010078910703546
ACSS2	PCYT2	1	-0.0128860870416766
ACSS2	PRRT4	1	-0.0620118924152875
ACSS2	SGK2	1	-0.0160664013763601
ACSS2	SLC16A7	1	-0.0421335859535786
ACSS2	SREBF1	1	-0.0386854616914725
ACSS2	THRSP	1	-0.0953228155445156
ACSS2	TKT	1	-0.020571089739882
ACSS3	C7orf43	1	0.0138679114859553
ACSS3	CGN	1	0.00633088704890716
ACSS3	CNNM2	1	-0.0200531976711461
ACSS3	FGF1	1	0.0110990201362779
ACSS3	GPD1L	1	-0.0442193405930017
ACSS3	PMM1	1	-0.016653520798975002
ACSS3	PPIL1	1	0.0233400423227007
ACSS3	PPM1L	1	-0.04188389956558
ACSS3	RCL1	1	-0.0224328000119747
ACSS3	SLC7A4	1	0.0231883776954359
ACTA1	CKM	1	-0.38292579902106705
ACTA1	KRT1	1	-0.0483894831888283
ACTA1	KRTDAP	1	-0.0026949329797369198
ACTA1	MB	1	-0.147194567883862
ACTA1	MYL2	1	-0.264475915412684
ACTA1	MYLPF	1	-0.0910892945724361
ACTA1	TCAP	1	-0.0130644484816378
ACTA1	TNNC1	1	-0.17419842158232401
ACTA1	TNNC2	1	-0.0663895386994828
ACTC1	ADARB1	1	-0.00927114601378793
ACTC1	ADCY5	1	-0.0197940065825083
ACTC1	ADRA1D	1	-0.0281692032173166
ACTC1	ADRA2C	1	-0.0499671067689533
ACTC1	DBNDD2	1	-0.008501759910670429
ACTC1	DMPK	1	-0.0140616191213119
ACTC1	FLNA	1	-0.0253271362430061
ACTC1	FOXC2	1	-0.0657952520814929
ACTC1	FOXL1	1	-0.0177239465216815
ACTC1	HEY2	1	-0.0253091143648725
ACTC1	ITIH3	1	-0.0970217676272252
ACTC1	JPH2	1	-0.0608590793931606
ACTC1	KCNQ4	1	-0.0559232717007382
ACTC1	LPHN3	1	-0.0222565353502432
ACTC1	MAK16	1	0.0209497529404931
ACTC1	MYL9	1	-0.0241263544150046
ACTC1	MYOZ1	1	-0.171173739466759
ACTC1	NMRK2	1	-0.016086595707892
ACTC1	NOV	1	-0.0512048730521067
ACTC1	NTF3	1	-0.0136691885717804
ACTC1	NTRK3	1	-0.064969196286365
ACTC1	P2RX1	1	-0.00108014224541775
ACTC1	PDK3	1	-0.0548538561614284
ACTC1	PRUNE2	1	-0.0039723566005651295
ACTC1	RGS7BP	1	-0.0299873525556927
ACTC1	RYR2	1	-0.0247919964615898
ACTC1	SMARCD3	1	-0.000631180991623459
ACTC1	SYNDIG1	1	-0.066399815462138
ACTG2	ASB2	1	-0.0948342653050668
ACTG2	C12orf75	1	-0.0112372731930679
ACTG2	CASQ2	1	-0.0426483290228475
ACTG2	CNN1	1	-0.288437620719086
ACTG2	CYFIP2	1	-0.0620561022223981
ACTG2	DES	1	-0.15893563776997302
ACTG2	FLNA	1	-0.00754333905351615
ACTG2	GAB2	1	-0.0284998181249192
ACTG2	GPC6	1	-0.000849914008413555
ACTG2	HMCN2	1	-0.0877417240761007
ACTG2	ITGA8	1	-0.0346826513601339
ACTG2	ITIH3	1	-0.00506594589853421
ACTG2	KCNH2	1	-0.0141211463665109
ACTG2	LPHN3	1	-0.0594482471734803
ACTG2	LTBP1	1	-0.0580916267113117
ACTG2	MICAL1	1	-0.0741136558988555
ACTG2	MUSTN1	1	-0.0432786957932018
ACTG2	MYH11	1	-0.33644478102370695
ACTG2	NCS1	1	-0.0487912868773971
ACTG2	NTF3	1	-0.0944243366409346
ACTG2	PCP4L1	1	-0.0195998942596439
ACTG2	PDLIM7	1	-0.0163059533634328
ACTG2	PLP1	1	-0.0008236881429317669
ACTG2	RASL12	1	-0.0407582510325928
ACTG2	SLN	1	-0.0488807536347815
ACTG2	TMBIM1	1	-0.0018907820665163399
ACTG2	TMEM35	1	-0.0368247389318048
ACTG2	TNC	1	-0.0624280285918632
ACTG2	TPM2	1	-0.037424097629115
ACTRT3	BAG3	1	-0.135906389381027
ACTRT3	WBP5	1	-0.00938589169152779
ACVR1B	ELL	1	-0.10158415110861
ACVR1B	LRP1	1	-0.0242148661909876
ACVR1B	ZBTB4	1	-0.00536095524199869
ACVR1C	AGPAT9	1	-0.11742574556131401
ACVR1C	ANO6	1	-0.0560438298144205
ACVR1C	DNAH9	1	-0.0232675839241347
ACVR1C	ECHDC3	1	-0.0401134876137121
ACVR1C	EPB41L4B	1	-0.0926076988458528
ACVR1C	GYG2	1	-0.078132696659234
ACVR1C	HADH	1	-0.0640266807862417
ACVR1C	HAS2	1	-0.00099939784961206
ACVR1C	MARC1	1	-0.077755418051776
ACVR1C	MYH14	1	-0.0314160473869849
ACVR1C	NAT8L	1	-0.0824753683528448
ACVR1C	NFKB2	1	-0.0259318718293484
ACVR1C	ORMDL3	1	-0.0537732077833475
ACVR1C	OXCT1	1	-0.0919055107982881
ACVR1C	PPP1R1B	1	-0.0357921172334744
ACVR1C	PRR5L	1	-0.00588553141261129
ACVR2A	PRICKLE1	1	-0.0736639715474011
ACVR2A	PTGER4	1	-0.0354348786361836
ACY1	BAD	1	0.0520137487827543
ACY1	CD93	1	-0.0496336451465596
ACY1	CREB3L4	1	-0.0137488963633231
ACY1	DAK	1	-0.0429055684122359
ACY1	DNPH1	1	-0.0229700532525492
ACY1	ECHS1	1	-0.0935499656530466
ACY1	GPT	1	-0.0369593060280494
ACY1	GSTZ1	1	-0.0175031009167207
ACY1	ICAM3	1	-0.00645731573913513
ACY1	LDHD	1	-0.176073398380571
ACY1	NUDT8	1	-0.0299786648927561
ACY1	PELI3	1	0.03744821970268
ACY1	SELENBP1	1	-0.127810114598267
ACY1	TEX2	1	0.0357671485032169
ACY1	THRSP	1	-0.0639749511377724
ACY1	VAT1	1	0.0528955798962165
ACY1	ZDHHC7	1	0.0248874737003142
ACY1	ZNF358	1	0.0597537407373117
ADA	CORO2B	1	-0.0751895047233526
ADA	STXBP6	1	-0.00857434201132031
ADAD2	TAF1C	1	-0.138479990546991
ADAM12	MARK1	1	-0.000826762622432788
ADAM12	TENM4	1	-0.0160738243253014
ADAM15	ADCY4	1	-0.0842352368031724
ADAM15	AIF1L	1	-0.0118081893472912
ADAM15	C11orf96	1	0.00383397892118092
ADAM15	CADPS2	1	-0.0459395850461399
ADAM15	CCM2L	1	-0.024286329670412
ADAM15	CD109	1	-0.0144397993589308
ADAM15	CD59	1	-0.0010477110674087
ADAM15	CLIC3	1	-0.0193635189024132
ADAM15	CYYR1	1	-0.00897674923718537
ADAM15	EFNB1	1	-0.0210894643144451
ADAM15	EPHB4	1	-0.0819608421428191
ADAM15	GDF15	1	0.0273587179054621
ADAM15	HEG1	1	-0.0687261308566096
ADAM15	HSPA12B	1	-0.0771109214382481
ADAM15	HYAL2	1	-0.131642589767416
ADAM15	ITGA6	1	-0.0031560555703142
ADAM15	JAG2	1	-0.0188039551220214
ADAM15	LCAT	1	-0.0015758074897085901
ADAM15	NPDC1	1	-0.129660073091107
ADAM15	NTF3	1	0.0443964448355511
ADAM15	PKN3	1	-0.15117247989089802
ADAM15	PMM2	1	-0.00015093544326966201
ADAM15	PRRT2	1	0.00445565557847073
ADAM15	RAMP2	1	-0.0443907906597018
ADAM15	RBM24	1	0.0127846789249747
ADAM15	RYR2	1	0.0250766017319991
ADAM15	SERP2	1	0.020520929567901
ADAM15	SLC9A3R2	1	-0.007160020045966479
ADAM15	SNTB1	1	0.0345349554279738
ADAM15	ST6GALNAC1	1	-0.0711523686335825
ADAM15	TAOK2	1	-0.06313557972765599
ADAM15	TEK	1	-0.0688079727156398
ADAM17	DUSP14	1	-0.0146137699315203
ADAM17	LMNA	1	-0.0315322301490309
ADAM17	RFX2	1	-0.014137593603115001
ADAM19	ADAM8	1	-0.0594308422416398
ADAM19	EDNRA	1	-0.0178169564184203
ADAM19	GALNT2	1	-0.00796670721178715
ADAM19	GPR97	1	-0.00399012630478431
ADAM19	MARCH3	1	-0.00270853663924406
ADAM19	MPP7	1	-0.00789796294364015
ADAM19	NCS1	1	-0.0199127908348691
ADAM19	TRAF3	1	-0.0365236425417552
ADAM19	ZDHHC14	1	-0.00323209204250455
ADAM22	C2orf40	1	-0.007543799471018659
ADAM22	CCDC81	1	-0.00874321574310245
ADAM22	KCNH2	1	-0.0314801240054455
ADAM22	MYOCD	1	-0.00228210625317948
ADAM22	NTF3	1	-0.0166695238316899
ADAM22	PMM2	1	0.00416893488075062
ADAM22	RAB9B	1	-0.034873108566668004
ADAM22	RGS7BP	1	-0.17384728932545002
ADAM23	SELP	1	-0.013506952072853998
ADAM28	ADAMDEC1	1	-0.0495578342302935
ADAM28	CD72	1	-0.12745708139692402
ADAM28	VMO1	1	-0.0410066112846053
ADAM33	ANGPTL2	1	-0.0148525221457826
ADAM33	CILP	1	-0.00142669974320558
ADAM33	COL12A1	1	-0.0142144050616096
ADAM33	COL6A1	1	-0.0770370637033502
ADAM33	DCLK1	1	-0.0506473902663259
ADAM33	FBN1	1	-0.0152092918484492
ADAM33	FBXL7	1	-0.0276189124742964
ADAM33	FIGF	1	-0.0715763325441891
ADAM33	ISLR	1	-0.20385925159403898
ADAM33	MFI2	1	-0.0150797332397392
ADAM33	OLFML1	1	-0.0666742638030686
ADAM33	OLFML3	1	-0.0159914940968967
ADAM33	OSR2	1	-0.0031518198034431602
ADAM33	SCARA5	1	-0.0595003042276338
ADAM33	THBS2	1	-0.0302030146984418
ADAM33	TSKS	1	-0.01063908803225
ADAM8	APOBR	1	-0.110986950537489
ADAM8	ATHL1	1	-0.0211939616573044
ADAM8	ATP2A3	1	-0.0164176900756458
ADAM8	CD163	1	0.066666271400992
ADAM8	CDKN2D	1	-0.0211383295597699
ADAM8	CSF3R	1	-0.0125337332486544
ADAM8	CST7	1	-0.122236511327459
ADAM8	DHRS13	1	-0.00401676208543818
ADAM8	DHX34	1	-0.0293004814493567
ADAM8	EIF4E3	1	-0.0327910819918925
ADAM8	GLT1D1	1	-0.005583032489716999
ADAM8	GMIP	1	-0.00559657771010511
ADAM8	GPR97	1	-0.0420968688466862
ADAM8	IL18RAP	1	-0.04833606237862
ADAM8	LIPN	1	-0.089315883794322
ADAM8	LPAR2	1	-0.0496478178732263
ADAM8	MBOAT7	1	-0.106710225944164
ADAM8	MMP25	1	-0.0687851093046802
ADAM8	MXD1	1	-0.0305033404745616
ADAM8	NBEAL2	1	-0.0620616457807699
ADAM8	NLRP6	1	-0.000337435497816937
ADAM8	PADI2	1	-0.0235832252915171
ADAM8	PFKFB4	1	-0.104648125507464
ADAM8	PPAP2A	1	0.0181116494762862
ADAM8	PROK2	1	-0.0896333863714958
ADAM8	PTGS2	1	-0.0169750925869082
ADAM8	QPCT	1	-0.0134549684521333
ADAM8	R3HDM4	1	-0.0180127178438807
ADAM8	RAB24	1	-0.0205660971022109
ADAM8	RAC2	1	-0.0486298525403391
ADAM8	RASSF5	1	-0.0325481596338817
ADAM8	REM2	1	-0.0414924044742666
ADAM8	RGL4	1	-0.0677287887742931
ADAM8	RGS14	1	-0.0242932838969927
ADAM8	SLC7A8	1	0.0149761401940474
ADAM8	SORL1	1	-0.10162897527384501
ADAM8	TMEM71	1	-0.0121113709066833
ADAM8	TRAF3	1	-0.00275597455456053
ADAM8	TREM1	1	-0.136850249851855
ADAM8	TREML2	1	-0.015665916336153
ADAM8	TRIM25	1	-0.00396035049925625
ADAM8	VSIG4	1	0.00910181531017995
ADAM9	ARHGEF10L	1	-0.0479875879542042
ADAM9	C11orf68	1	-0.0065743041690742
ADAM9	CALCOCO1	1	-0.0332338266735999
ADAM9	CALU	1	-0.018040856601240003
ADAM9	DENND4C	1	-0.0412152283848982
ADAM9	FEZ1	1	-0.0336976937433944
ADAM9	H2AFJ	1	-0.00918788481065144
ADAM9	LRIF1	1	0.00606488834035299
ADAM9	MMP14	1	-0.020788367789083998
ADAM9	MYO1D	1	-0.0490479991087251
ADAM9	MYO9B	1	-0.0011275212953747401
ADAM9	NFE2L2	1	0.009162683631670741
ADAM9	PLXNB1	1	-0.0179541796475713
ADAM9	SELE	1	0.0115425040399387
ADAM9	SRSF7	1	0.0065389819346047704
ADAM9	TNS1	1	-0.0111508533403866
ADAM9	TP53I11	1	-0.0128307746659762
ADAM9	ZNF358	1	-0.0100116766442391
ADAMDEC1	BLK	1	-0.0615610415538022
ADAMDEC1	CD79A	1	-0.0429896271375099
ADAMDEC1	KIAA1199	1	-0.0134956468551352
ADAMTS1	BTG2	1	-0.0106237593901176
ADAMTS1	CCNL1	1	-0.0102412939929405
ADAMTS1	CDKN1A	1	-0.0154479574988149
ADAMTS1	CH25H	1	-0.0343196607773724
ADAMTS1	CSRNP1	1	-0.0788202028273897
ADAMTS1	CYR61	1	-0.0034089277507840603
ADAMTS1	EGR2	1	-0.000425305570249827
ADAMTS1	EGR3	1	-0.044996006375208
ADAMTS1	FOSL2	1	-0.102683255495063
ADAMTS1	HBEGF	1	-0.0827759963480901
ADAMTS1	IL6	1	-0.0654375314034324
ADAMTS1	ING1	1	-0.00108052403707884
ADAMTS1	MYC	1	-0.0782576708851696
ADAMTS1	NR4A2	1	-0.0809561670643378
ADAMTS1	NR4A3	1	-0.0274327013891201
ADAMTS1	RASD1	1	-0.0857746383941325
ADAMTS1	RNF122	1	-0.12478742007993199
ADAMTS1	SIK1	1	-0.13397986222733
ADAMTS1	SOX17	1	-0.0173943343754793
ADAMTS1	TIPARP	1	-0.0359560848654411
ADAMTS1	TRAF4	1	-0.0358412840356012
ADAMTS10	ASAP2	1	-0.0175522348785713
ADAMTS10	DLG5	1	-0.0235568241210856
ADAMTS10	FGD1	1	-0.0061902566874125
ADAMTS10	INPPL1	1	-0.0314044705639363
ADAMTS10	KIAA1551	1	0.0355560894001183
ADAMTS10	MAP3K10	1	-5.5080861140682106e-05
ADAMTS10	MRGPRF	1	-0.006525977283093271
ADAMTS10	NOC3L	1	0.019303437632105
ADAMTS10	NOTCH3	1	-0.055178534391728
ADAMTS10	PDGFRB	1	-0.0270721209935688
ADAMTS10	PXDN	1	-0.0133427882664913
ADAMTS10	SRPX2	1	-0.0105093185456177
ADAMTS10	ST5	1	-0.0235511420552466
ADAMTS12	LAMA4	1	-0.00225310341104202
ADAMTS13	ANKRD24	1	-0.103590849946769
ADAMTS13	PET112	1	-0.0409491458225865
ADAMTS13	RECQL5	1	-0.0212968095223607
ADAMTS13	SCNN1D	1	-0.0728283585589832
ADAMTS13	SLC25A27	1	-0.0181030550175632
ADAMTS13	SPAG5	1	-0.0205894065950223
ADAMTS13	VARS2	1	-0.0445607035832448
ADAMTS14	IGF1	1	-0.0129606529635555
ADAMTS14	SCG2	1	-0.0581608023531923
ADAMTS14	THBS3	1	-0.0154965710255353
ADAMTS15	FGD3	1	0.0077709847246938794
ADAMTS16	ADAMTSL1	1	-0.0342745378606749
ADAMTS16	ADAMTSL5	1	-0.000705946604429578
ADAMTS16	CRABP2	1	-0.0819849889166603
ADAMTS16	FBN1	1	-0.00861706563222696
ADAMTS16	FNDC5	1	-0.0799813263339521
ADAMTS16	ITGA11	1	-0.0865688506567881
ADAMTS16	LRRC17	1	-0.0118002508321532
ADAMTS16	PAMR1	1	-0.0447492857839038
ADAMTS16	PRRG3	1	-0.0176996284759318
ADAMTS16	SPSB4	1	-0.12845436061796
ADAMTS16	TPST1	1	-0.0120048538063583
ADAMTS18	BIN3	1	-0.0188917627326454
ADAMTS18	FGF1	1	-0.00322065292528179
ADAMTS18	GNAZ	1	-0.0783345203614089
ADAMTS18	IRAK3	1	0.0196938337532859
ADAMTS18	RAPGEF5	1	-0.0450966031411154
ADAMTS18	SDC3	1	-0.027022725920136003
ADAMTS18	SEMA3F	1	-0.0185714075081012
ADAMTS18	SGSM2	1	-0.0359196778423629
ADAMTS2	COL6A2	1	-0.00465478099936624
ADAMTS2	DAAM2	1	-0.0111337475042215
ADAMTS2	LIMD2	1	0.00419152396812289
ADAMTS2	NID1	1	-0.0137966141215587
ADAMTS3	GRB7	1	-0.0009064950582078449
ADAMTS3	PTPRZ1	1	-0.111117267308875
ADAMTS3	RAB11FIP3	1	-0.0277986842589722
ADAMTS5	CHST7	1	-0.0234543521241927
ADAMTS5	FBN1	1	-0.0330335358938962
ADAMTS5	FSTL1	1	-0.0119425492481287
ADAMTS5	LPAR1	1	-0.102940810260765
ADAMTS5	WIPI1	1	-0.0328736515373268
ADAMTS8	ARTN	1	-0.00376253501943765
ADAMTS8	C12orf75	1	-0.0243696988682135
ADAMTS8	KCNA5	1	-0.0380035112369907
ADAMTS8	NTRK3	1	-0.0070042729523381
ADAMTS9	TEAD4	1	-0.0236268034994611
ADAMTS9	TK1	1	-0.00034898662657349705
ADAMTSL1	FBN1	1	-0.0630494981952377
ADAMTSL1	SCARA5	1	-0.0126129686602814
ADAMTSL4	ADD3	1	-0.0211072528744087
ADAMTSL4	ANKRD53	1	-0.0732662091978317
ADAMTSL4	ATP10A	1	-0.00040820280596468397
ADAMTSL4	FHOD3	1	-0.07853556444193599
ADAMTSL4	IGF1	1	-0.0181097148849689
ADAMTSL4	LRRC17	1	-0.0056239588415735
ADAMTSL4	RFNG	1	-0.0247627570322732
ADAMTSL4	SPSB4	1	-0.00970310935602072
ADAMTSL4	SRPX	1	-0.007872001513182491
ADAMTSL5	F10	1	-0.0621403491752222
ADAMTSL5	GAS7	1	-0.0612601627843636
ADAMTSL5	SLC22A17	1	-0.0453797580591167
ADAP1	HCK	1	-0.0157480797818292
ADAP1	ITGAM	1	-0.0275926977749922
ADAP1	PIK3AP1	1	-0.0134556685764898
ADAP1	RBM47	1	-0.0249619832153652
ADARB1	CALD1	1	-0.0801704514789233
ADARB1	GPRC5C	1	-0.0337492248732835
ADARB1	MYH10	1	-0.0971174355015649
ADARB1	MYO1D	1	-0.0295165637349012
ADARB1	NOV	1	-0.0499034199092059
ADARB1	SORBS2	1	-0.00505239637234444
ADAT2	ATP5G1	1	-0.0386143416253946
ADAT2	CALCOCO1	1	0.0291261442431119
ADAT2	DVL2	1	0.0022713138009825
ADAT2	NCLN	1	-0.0149470946465718
ADAT2	NME1	1	-0.0250234250829269
ADAT2	PHF1	1	0.0144631073418731
ADAT2	SRM	1	-0.0312897517155412
ADAT2	TARBP1	1	-0.140432781134633
ADAT2	UROS	1	-0.0022249264046453
ADAT2	ZBTB4	1	0.0053452726829540205
ADCK5	LRRC45	1	-0.0285420665955214
ADCY3	DAAM2	1	-0.0187870339949653
ADCY3	EGFLAM	1	-0.0363901496282956
ADCY3	LHFP	1	-0.0282246892107458
ADCY3	TACC1	1	-0.0294959566026356
ADCY3	WDR81	1	-0.0361833962577395
ADCY4	ARAP3	1	-0.060747295524415004
ADCY4	CASKIN2	1	-0.0934466972565422
ADCY4	CBFA2T3	1	-0.0232338413225086
ADCY4	CCM2L	1	-0.0241494502857485
ADCY4	JAG2	1	-0.00838990481745543
ADCY4	MYO15B	1	-0.0459879968226721
ADCY4	NPDC1	1	-0.045467207814282
ADCY4	PPP2R2B	1	0.000472207718673678
ADCY4	RAPGEF3	1	-0.018844513446593002
ADCY4	RIPK3	1	-0.0231960755089129
ADCY4	TAOK2	1	-0.0263098980952498
ADCY4	TEK	1	-0.0265872654142482
ADCY5	ARHGEF25	1	-0.000680338856006379
ADCY5	ARID5B	1	-0.0496902834813915
ADCY5	ASB2	1	-0.0509619798333489
ADCY5	ATP2A2	1	-0.00017526842285287
ADCY5	BRSK2	1	-0.00776879099940875
ADCY5	C1QTNF1	1	-0.0244873727564432
ADCY5	DTNA	1	-0.0567428481928686
ADCY5	DUSP26	1	-0.0220534775223519
ADCY5	FLNA	1	-0.0214335811893319
ADCY5	FOXC2	1	-0.0462912757296621
ADCY5	GRIK5	1	-0.0406205183136022
ADCY5	ITIH3	1	-0.0527895963108802
ADCY5	KCNQ4	1	-0.0306358793839576
ADCY5	KIAA1239	1	-0.00470255288439059
ADCY5	LDOC1	1	-0.01026842869666
ADCY5	MOB2	1	-0.0015832391983441301
ADCY5	MYL9	1	-0.0034583779758992897
ADCY5	MYOZ1	1	-0.0486963230648796
ADCY5	NTF3	1	-0.007862769615738991
ADCY5	PDZD4	1	-0.0150513151141056
ADCY5	PRDM16	1	-0.0608324223679875
ADCY5	RAB6B	1	-0.057380799486872004
ADCY5	RBPMS	1	-0.0172250834214386
ADCY5	RYR2	1	-0.0395658937732964
ADCY5	SIDT2	1	-0.0265067114693763
ADCY5	SORBS1	1	-0.12715664169684
ADCY5	SPEG	1	-0.0066054593916839
ADCY5	SYNPO2	1	-0.0537261565646989
ADCY5	TMBIM1	1	-0.0840471143545659
ADCY7	AHSA1	1	-0.0515940482987469
ADCY7	BAIAP2	1	-0.00533593043249043
ADCY7	C11orf84	1	-0.0111045055825166
ADCY7	DENND4B	1	-0.11239896253771199
ADCY7	DOK2	1	-0.0360389030982631
ADCY7	FMNL1	1	-0.0959285777923476
ADCY7	IL10RA	1	-0.0811394196385646
ADCY7	ITGAM	1	-0.0101063304903672
ADCY7	MARS	1	-0.000688532934174382
ADCY7	NCKAP1L	1	-0.0976375237011952
ADCY7	SELPLG	1	-0.0041089679355742394
ADCYAP1R1	KCND1	1	-0.0668518418904028
ADD2	CLEC4F	1	-0.11908189783313199
ADD2	VAX2	1	-0.0279458978261932
ADD3	AMPH	1	-0.00336618091637059
ADD3	DCLK1	1	-0.061810170427143
ADD3	LPAR1	1	-0.0612081557805957
ADD3	MAP1A	1	-0.035612589710762005
ADD3	SCARA5	1	-0.03922075353394
ADD3	WBSCR17	1	-0.020011083777899
ADD3	XPNPEP2	1	-0.017120221764768
ADHFE1	C5	1	-0.0513992461815378
ADHFE1	DCXR	1	-0.05855546150508401
ADHFE1	LETMD1	1	-0.0260906273716358
ADHFE1	PXMP2	1	-0.0166634999017235
ADHFE1	SLC25A27	1	-0.0213612171863244
ADIPOR2	DLAT	1	-0.00351073616774408
ADIPOR2	EBP	1	-0.0124428544005423
ADIPOR2	FADS2	1	-0.0370874860757466
ADIPOR2	GALNT18	1	-0.00750814703317895
ADIPOR2	KCNE1	1	-0.0810070201788013
ADIPOR2	MID1IP1	1	-0.00426237538858449
ADIPOR2	MVD	1	-0.0511551513509681
ADIPOR2	THRSP	1	-0.0283238311085383
ADIRF	ATP6V0E2	1	-0.0082219070926887
ADIRF	GPX4	1	-0.0369720091024402
ADIRF	HSD17B8	1	-0.038776313548709994
ADIRF	KCNIP2	1	-0.0363138614448298
ADIRF	PLA2G16	1	-0.018788545819622
ADIRF	SELENBP1	1	-0.00845790123882624
ADIRF	TEAD4	1	-0.00561924719926317
ADM	ORAI3	1	-0.00777013898277481
ADM	SVEP1	1	-0.015299418456665999
ADM5	CD79B	1	-0.015609761587671002
ADM5	CFI	1	-0.0305203678176223
ADM5	CPLX1	1	-0.0833828874938971
ADM5	DARC	1	-0.0776457680724924
ADM5	ETS2	1	-0.036971548417912004
ADM5	EXT1	1	0.0132706362112606
ADM5	FAM110D	1	-0.0422253499365175
ADM5	FAM13C	1	-0.0468126470182278
ADM5	IFITM1	1	-0.0204031848491601
ADM5	KLHL3	1	-0.10036529065753501
ADM5	MAN1B1	1	-0.00424810164865504
ADM5	MCTP1	1	-0.000248282985564983
ADM5	MFAP3	1	-0.0447699144202867
ADM5	MKL2	1	-0.063758200929246
ADM5	OLFM1	1	-0.0872917053453029
ADM5	PCDH17	1	-0.0229374477754906
ADM5	PTGER1	1	-0.0319264281314243
ADM5	SPNS2	1	-0.0893408949670465
ADM5	SULF2	1	-0.0861078871829022
ADM5	TACR1	1	-0.00043501794679180403
ADM5	THSD7A	1	-0.0836101465756643
ADM5	ZNF385D	1	-0.0493483980752136
ADORA1	APBB1IP	1	-0.0147977353674328
ADORA1	C19orf80	1	-0.0241824626408947
ADORA1	CDKN2C	1	-0.00310447381691495
ADORA1	DGAT1	1	-0.0936864879802026
ADORA1	ELOVL3	1	-0.00606334187627591
ADORA1	KLHL31	1	-0.0206198395075489
ADORA1	MMP15	1	-0.0221487907970771
ADORA1	MRAS	1	-0.0181489383262005
ADORA1	PRRT4	1	-0.0239287123362257
ADORA2A	BHLHE41	1	-0.0346810350190189
ADORA2A	DHRS13	1	-0.00856256226380757
ADORA2A	EDNRA	1	-0.006496082752793829
ADORA2A	TNIP1	1	-0.008701553569629629
ADORA2A	UNC119	1	-0.0285678201187657
ADORA3	ANGPTL1	1	-0.0025181949168106
ADORA3	BAIAP2	1	-0.0184892292340553
ADORA3	C1orf162	1	-0.0507312421157881
ADORA3	CD163	1	-0.0708936398252037
ADORA3	CYP4B1	1	-0.0308512354804692
ADORA3	EYA2	1	-0.0075559117614597705
ADORA3	HCLS1	1	-0.0407269529441225
ADORA3	MERTK	1	-0.0910445463241622
ADORA3	NEXN	1	-0.0287393100396592
ADORA3	PMP22	1	-0.0313325955687078
ADORA3	RASSF4	1	-0.059096726538569
ADORA3	RNASE6	1	-0.00916386209670792
ADORA3	SAMD10	1	0.0002051695660516
ADORA3	SIGLEC1	1	-0.0409722377383275
ADORA3	SLAMF8	1	-0.0237512810707626
ADORA3	SLCO2B1	1	-0.073859582644259
ADORA3	TACC1	1	-0.0217637248161321
ADORA3	TSC22D3	1	-0.0157432820314122
ADORA3	VSIG4	1	-0.0933724622477259
ADORA3	ZBTB16	1	-0.0214942227844768
ADPRM	B3GNT5	1	0.00155904966696113
ADPRM	C6orf48	1	-0.0273850940565849
ADPRM	CCNI	1	-0.0278209034713476
ADPRM	CDH3	1	0.0233741991322984
ADPRM	CDKN2AIP	1	-0.0218904420282841
ADPRM	CEP170B	1	0.0006769572302678349
ADPRM	CIRBP	1	-0.0349574633777068
ADPRM	CLCF1	1	0.0106947231386646
ADPRM	DYM	1	-0.0550269758068899
ADPRM	EIF4EBP3	1	-0.0134720768530335
ADPRM	ETNK2	1	-0.0226621079880895
ADPRM	GRB7	1	0.00908758798740549
ADPRM	LAMA4	1	0.00409094801519867
ADPRM	MAST4	1	0.00174383864530393
ADPRM	PPP2R1B	1	0.015565685368596002
ADPRM	SIL1	1	0.00361597139424541
ADPRM	TRIB1	1	0.0439453083047347
ADPRM	TXNDC16	1	-0.0263408589173237
ADRA1B	DAAM2	1	-0.0028139333051542302
ADRA1D	ARVCF	1	-0.0717033240421508
ADRA1D	EDIL3	1	-0.0154881314229057
ADRA1D	EMX2	1	-0.0182089100987424
ADRA1D	ITIH3	1	-0.0580794784268893
ADRA1D	KCNQ4	1	-0.0536521340059326
ADRA1D	LGR6	1	-0.0692756747232101
ADRA1D	LINGO1	1	-0.0834102156459203
ADRA1D	LPHN3	1	-0.0478553585982996
ADRA1D	MRVI1	1	-0.0116616490030684
ADRA1D	MYOZ1	1	-0.0324443672235325
ADRA1D	NR2F2	1	-0.03019129244962
ADRA1D	RCAN2	1	-0.00885027279799134
ADRA1D	RGS7BP	1	-0.10428923218743902
ADRA1D	RYR2	1	-0.0199110653048754
ADRA1D	SYTL2	1	-0.0281494614519876
ADRA1D	TAGLN	1	-0.101972099783896
ADRA1D	TMEM200A	1	-0.00535476899042495
ADRA2A	AMOTL2	1	-0.00241299675257484
ADRA2A	C5orf30	1	-0.0827822845154579
ADRA2A	EPB41L4B	1	-0.0665614105712359
ADRA2A	GABRE	1	-0.0297165336713002
ADRA2A	MGAT3	1	-0.0831378826762217
ADRA2A	MSC	1	-0.0231621509239247
ADRA2A	PHLDA3	1	-0.00510751509463916
ADRA2A	PICK1	1	0.00233268936216345
ADRA2A	RTN4RL1	1	-0.00846412659291605
ADRA2A	RUNX1	1	-0.0741036586270482
ADRA2B	CACNA1H	1	-0.012033112023682999
ADRA2B	GYS1	1	-0.0370856525050552
ADRA2B	SLCO4A1	1	-0.0399529074481774
ADRA2C	BRSK2	1	-0.0355074105630024
ADRA2C	CACNA1H	1	-0.0651040334773434
ADRA2C	CALD1	1	-0.0341703177481171
ADRA2C	DBNDD2	1	-0.0538975976739899
ADRA2C	EMX2	1	-0.0264914025838632
ADRA2C	ENDOD1	1	-0.0443605184869358
ADRA2C	FBXO32	1	-0.0142809471155722
ADRA2C	ITIH3	1	-0.037629827836221
ADRA2C	KLHL26	1	-0.0240606221146936
ADRA2C	MFGE8	1	-0.0578834188988832
ADRA2C	NKD1	1	-0.0241469734386651
ADRB1	CCDC3	1	-0.007500048742992571
ADRB1	ETNK2	1	0.0398597294784297
ADRB1	PRR16	1	0.0142452966837884
ADRB2	BIN3	1	-0.00412706553987276
ADRB2	CASKIN2	1	-0.0517338065431341
ADRB2	CCRL2	1	-0.0701060080413835
ADRB2	FABP4	1	-0.0340402689655128
ADRB2	GJA5	1	-0.10351087245779599
ADRB2	GNAI1	1	-0.055406304321274004
ADRB2	GYS1	1	0.0164062708469358
ADRB2	PDK4	1	-0.0074857978337127
ADRB2	PFKFB4	1	0.008665208919571829
ADRB2	SCN4A	1	-0.0597855297712859
ADRB2	SEMA3G	1	-0.154358847008105
ADRB2	SLC52A2	1	-0.0265284931689601
ADRB2	SREBF1	1	0.029497472897974
ADRB2	STX6	1	0.0345074265600874
ADRB2	TLR4	1	-0.0658292176898087
ADRB2	TSC22D1	1	-0.00088784453666919
ADTRP	PEAR1	1	0.0107139167118115
ADTRP	TMEM198	1	0.022432855822860004
AEBP1	ANTXR1	1	-0.0108262818441188
AEBP1	C1R	1	-0.0180931932913433
AEBP1	CALD1	1	-0.0387597456515732
AEBP1	CLIP3	1	-0.009735284142405709
AEBP1	COL8A2	1	-0.0199107631613846
AEBP1	CTSK	1	-0.0955548948713541
AEBP1	EMX2	1	-0.015507708539234
AEBP1	FEZ1	1	-0.13016418068208502
AEBP1	GREM1	1	-0.0644730827395991
AEBP1	HTR2B	1	-0.0794311177892345
AEBP1	ITGBL1	1	-0.0386868493580168
AEBP1	JAM3	1	-0.007854579299015741
AEBP1	MMP14	1	-0.0351594495356161
AEBP1	MRVI1	1	-0.0444790418929079
AEBP1	PALLD	1	-0.0015950837448844301
AEBP1	SLIT3	1	-0.0436695828195683
AEBP1	TIMP2	1	-0.149336049838362
AEN	EDA2R	1	-0.0307747188314434
AEN	PPRC1	1	-0.0160895147236694
AFAP1	CCDC85C	1	-0.0311717787730727
AFAP1	CMIP	1	-0.11575489898032698
AFAP1	ELF4	1	-0.0213989530698555
AFAP1	GLIS2	1	-0.0418919299776808
AFAP1	HCLS1	1	0.0222710311702183
AFAP1	HDAC7	1	-0.00794824922879785
AFAP1	KIAA1522	1	-0.0472643234891529
AFAP1	NDST1	1	-0.0217418180029006
AFAP1	ORC5	1	0.00767162726819845
AFAP1	RAI1	1	-0.0656870536354282
AFAP1	REPIN1	1	-0.0213125806244553
AFAP1	SH3BP4	1	-0.0173492425698345
AFAP1	SIPA1L2	1	-0.0439625459432702
AFAP1	SYNPO	1	-0.0353567960889926
AFAP1	ZBTB4	1	-0.0150046552874304
AFAP1L1	JUP	1	-0.10197250725263801
AFAP1L1	KIAA1462	1	-0.0332768792774565
AFAP1L1	N4BP3	1	-0.0567649597892779
AFAP1L1	ZNF395	1	-0.0118524173980035
AFAP1L2	EMCN	1	-0.0025721873092838603
AFF4	ATP2A2	1	-0.0039503036174193895
AFF4	ATXN7	1	-0.0633766898704754
AFF4	C10orf137	1	4.73625992796767e-05
AFF4	CHD1	1	-0.0156178742409165
AFF4	FARP1	1	-0.0123466169421567
AFF4	PDE4D	1	-0.00228660355386261
AFF4	RLF	1	-0.0245199690905609
AFF4	SETD5	1	-0.00792544498014257
AFF4	TTBK2	1	-0.0323519541420956
AGAP2	CCDC85A	1	-0.0021554907682621
AGAP2	HIGD1B	1	-0.0390700309232447
AGAP2	PCDH12	1	-0.00738747843913038
AGAP2	REEP2	1	-0.0282013819068023
AGAP2	RGS5	1	-0.0074478226697685295
AGAP2	SCN4B	1	-0.123921754103059
AGAP2	THBS4	1	-0.0692397483235871
AGAP2	TNN	1	-0.0694540315089723
AGAP2	VIPR1	1	-0.00291346148757017
AGAP3	FAM219A	1	-0.00412647084042076
AGAP3	MADD	1	-0.0275166004045219
AGAP3	SRRM2	1	-0.00526201662490987
AGAP3	STARD9	1	-0.0159854750186511
AGAP3	USP48	1	-0.00540306757146854
AGAP3	ZMYM3	1	-0.000293975105575391
AGAP3	ZNF609	1	-0.00429068191392505
AGER	AVIL	1	-0.0188818068642964
AGFG2	DHCR7	1	-0.010237483698892
AGFG2	FAM213B	1	-0.000127334388626901
AGFG2	FRY	1	-0.0573205677844242
AGFG2	FZD6	1	-0.00464201537110557
AGFG2	IQGAP2	1	0.00410392736232236
AGFG2	MAOB	1	0.0415588969447859
AGFG2	MFAP3	1	-0.0191293018590306
AGFG2	NYAP1	1	-0.0889477354713687
AGFG2	PDIA5	1	-0.0059944781415276
AGFG2	PRKAR1B	1	-0.0281050503356103
AGFG2	ST6GAL1	1	-0.0681563017288314
AGFG2	THSD7A	1	-0.00431646106530185
AGFG2	TJP1	1	-0.0128186642574688
AGFG2	TMEM255B	1	-0.0482313069258754
AGO2	ATXN7	1	-0.00633831558811445
AGO2	EHD1	1	-0.0116884825483369
AGO2	ERN1	1	-0.0578651922179717
AGO2	MECP2	1	-0.0201056415253637
AGPAT2	C14orf180	1	-0.19599678335444898
AGPAT2	CHCHD10	1	-0.0557363084216266
AGPAT2	DGAT1	1	-0.00111239743899051
AGPAT2	DGAT2	1	-0.21075724410586302
AGPAT2	GPAM	1	-0.0661956546173369
AGPAT2	GPD1	1	-0.0734862463791602
AGPAT2	GPT2	1	-0.0437530040030451
AGPAT2	LGALS12	1	-0.0551739007645245
AGPAT2	LPL	1	-0.0412408524049183
AGPAT2	MARC1	1	-0.03958821701344
AGPAT2	MESP1	1	-0.140227569340269
AGPAT2	MRAP	1	-0.12229823229030899
AGPAT2	NAT8L	1	-0.0161696012397883
AGPAT2	NMB	1	-0.053219887411457
AGPAT2	PC	1	-0.0567249047107083
AGPAT2	PFKFB1	1	-0.0206711384022532
AGPAT2	PLIN1	1	-0.129161331027518
AGPAT2	PNPLA2	1	-0.0368509508205769
AGPAT2	PRRT4	1	-0.0536121178216103
AGPAT2	RBP4	1	-0.200705651492703
AGPAT2	SLC7A10	1	-0.026932885739319
AGPAT2	THRSP	1	-0.0440733130008325
AGPAT2	TUSC5	1	-0.0296459642004489
AGPAT3	FAM53B	1	-0.0415782786146508
AGPAT4	MPP1	1	-0.0125596721785166
AGPAT4	NFATC2	1	-0.00260822757153093
AGPAT4	RFX2	1	-0.0648729617387347
AGPAT4	SGMS2	1	-0.016020486612488002
AGPAT4	ZSWIM6	1	-0.0423229252712472
AGPAT5	CHD2	1	0.0201387579467834
AGPAT5	DNAJA4	1	0.0436935966957853
AGPAT5	ELTD1	1	-0.0604054093380293
AGPAT5	MRPL18	1	0.0148606649236564
AGPAT5	NUDCD1	1	-0.0329950970367349
AGPAT5	ZDHHC13	1	-0.0041965288953927
AGPAT9	AMN	1	-0.0525198109581125
AGPAT9	APMAP	1	-0.0242869860771379
AGPAT9	CDKN2C	1	-0.0974463613514561
AGPAT9	DNAH9	1	-0.0060231989909782895
AGPAT9	G0S2	1	-0.00457287748576031
AGPAT9	GLIS1	1	-0.0547229047985255
AGPAT9	HADH	1	-0.0204599698462615
AGPAT9	ICAM3	1	-0.000622370316972949
AGPAT9	LRIG1	1	-0.0261151405186915
AGPAT9	LTA4H	1	-0.0242723929243502
AGPAT9	MDFI	1	-0.0307505838496577
AGPAT9	MXD4	1	0.00243729019313568
AGPAT9	MYH14	1	-0.0040870096292615
AGPAT9	ORMDL3	1	-0.0322547093702535
AGPAT9	PDZD7	1	-0.015917050356107
AGPAT9	PPP1R16A	1	-0.0291264625215181
AGPAT9	RNF175	1	-0.0275247989309496
AGPAT9	TTC36	1	-0.0503306399178167
AGRN	ASPHD1	1	-0.0103172255802752
AGRN	ATP11A	1	-0.004585999871147921
AGRN	C11orf35	1	-0.0362829404803856
AGRN	C20orf112	1	-0.0211085049047356
AGRN	CCDC85C	1	-0.123803348013055
AGRN	CDC42EP1	1	-0.0109444714303315
AGRN	CDH5	1	-0.0118801730328255
AGRN	CELSR2	1	-0.126712884317361
AGRN	CFI	1	-0.0390212649542278
AGRN	CLDN15	1	-0.000346212146173475
AGRN	COL15A1	1	-0.0953516914631398
AGRN	DAB2IP	1	-0.0051974877455809
AGRN	ERG	1	-0.00520545219317705
AGRN	EZR	1	-0.0389352234400494
AGRN	FAM213B	1	-0.0257409334153721
AGRN	FAM83H	1	-0.11185444701701401
AGRN	GALNT9	1	-0.0159530591107141
AGRN	HEG1	1	-0.0141449773604907
AGRN	IGSF9	1	-0.015492043359533001
AGRN	KANSL1L	1	0.00780999131192953
AGRN	KIAA1522	1	-0.105889926775121
AGRN	KIFC3	1	-8.057496374297421e-05
AGRN	LZTS1	1	-0.0494411844325023
AGRN	MAL2	1	-0.00540815661352729
AGRN	MICU3	1	0.0264440727627367
AGRN	MINK1	1	-0.0243432723426003
AGRN	MMP15	1	-0.0180590530051882
AGRN	NRN1	1	-0.011205976987862
AGRN	NUDT14	1	-0.0133603581265745
AGRN	PAFAH1B3	1	-0.0200739387956945
AGRN	PLEC	1	-0.0247357880613075
AGRN	REC8	1	-0.0140059792269018
AGRN	SAMD10	1	-0.0292668038661013
AGRN	SEZ6L2	1	-0.0590636682639044
AGRN	SIPA1L2	1	-0.0073294586069644
AGRN	SPATA6	1	0.0166678951273338
AGRN	TM4SF1	1	-0.0363025248455027
AGRN	TMEM132A	1	-0.0208438543335404
AGRN	TMEM151A	1	-0.0629064755350433
AGRN	TRIM23	1	0.065766448498939
AGRN	VIPAS39	1	0.0125369917809236
AGT	CHCHD10	1	-0.000305939158103563
AGT	EBP	1	-0.0279985325992253
AGT	LDHD	1	-0.0215108322074828
AGT	ME1	1	-0.0453805107352591
AGT	MME	1	-0.0100517598789019
AGT	NXPH4	1	-0.0574221669645767
AGT	REEP6	1	-0.0597519832280569
AGT	TAX1BP3	1	0.00845845780354964
AGT	THRSP	1	-0.0049591874205103205
AGTR1	ANGPTL1	1	-0.0022562632634878397
AGTR1	ATP9A	1	0.0018471596614886602
AGTR1	DCLK1	1	-0.0178749834366897
AGTR1	LAMA2	1	-0.0120154844044599
AGTR1	LMO3	1	-0.127720892962297
AGTR1	LPAR1	1	-0.000695130633268981
AGTR1	MRAS	1	0.00437749735067854
AGTR1	MYZAP	1	1.21699017374688e-06
AGTR1	NOVA1	1	-0.0336395361859488
AGTR1	PARM1	1	-0.0850661097492932
AGTR1	PLCG1	1	-0.00939101163526888
AGTR1	PPAP2B	1	-0.0253647662708633
AGTR1	SPRY2	1	-0.0527322754121944
AGTR1	SRPX	1	-0.126147299520667
AGTR1	SYNE2	1	-0.00315247864549993
AGTR1	SYNPO	1	0.0455372596370785
AGTR1	TACC1	1	-0.0205314666992089
AHDC1	AXIN2	1	-0.0343861784616523
AHDC1	BCCIP	1	0.0087520661849171
AHDC1	BCL9L	1	-0.114710467750556
AHDC1	IQGAP2	1	0.0333393117093655
AHDC1	PEAR1	1	-0.008102690693502541
AHDC1	PGF	1	-0.0346969249474435
AHDC1	PIAS3	1	-0.0984235021747014
AHDC1	PRR12	1	-0.117174492691056
AHDC1	RCOR3	1	-0.00608691194723817
AHDC1	SUFU	1	-0.0315448436263982
AHDC1	ZNF205	1	-0.0593874438761804
AHRR	CYP1A1	1	-0.0175206446209672
AHSA1	BAG3	1	-0.0132244768363323
AHSA1	C11orf84	1	-0.119218996914303
AHSA1	C7orf61	1	-0.00901449213537595
AHSA1	CCT2	1	-0.0040774557639670795
AHSA1	CD2AP	1	0.118638961480491
AHSA1	CYYR1	1	0.007370874810751409
AHSA1	DEDD2	1	-0.0027524260021173897
AHSA1	DNAJA4	1	-0.129726193067358
AHSA1	DNAJB2	1	-0.011449418768078999
AHSA1	DNAJB4	1	-0.0638826092309143
AHSA1	DNASE1L2	1	-0.00597403541376059
AHSA1	ELTD1	1	0.10283310498461802
AHSA1	FAM173B	1	-0.0198515643131314
AHSA1	FAM213B	1	0.0526172718489102
AHSA1	FPGS	1	0.0421683497256366
AHSA1	GPR146	1	0.0913474754227682
AHSA1	HSPA4	1	-0.0273080884408182
AHSA1	HSPB8	1	-0.0203755661628113
AHSA1	HSPH1	1	-0.141565539320849
AHSA1	LMAN2L	1	-0.0963296007361034
AHSA1	MAPK3	1	0.0391780015995669
AHSA1	MFNG	1	0.0144792889242579
AHSA1	MRPL18	1	-0.11086300850135
AHSA1	NAALADL1	1	0.0143379742041467
AHSA1	PMVK	1	-0.0556320402471665
AHSA1	RPS6KA2	1	0.0491748148329649
AHSA1	SLC2A9	1	-0.0227959910611337
AHSA1	SLC37A4	1	0.000943169812176035
AHSA1	TMEM79	1	-0.0418471889168395
AHSA1	TSKS	1	-0.0164857088635776
AHSA1	TUSC3	1	0.000122924321090179
AHSA1	WDR54	1	0.0009853238841601509
AHSA1	ZNF792	1	0.0337120726122993
AHSP	ALAS2	1	-0.19266942322651104
AHSP	CA1	1	-0.344352013869915
AHSP	MMP8	1	-0.0281770687257385
AIF1	ARHGAP30	1	-0.000454499224529035
AIF1	C1QA	1	-0.0887183989030427
AIF1	C1QB	1	-0.0103806788210782
AIF1	C1QC	1	-0.0027336549088961
AIF1	CCR1	1	-0.00129444539498208
AIF1	CD14	1	-0.0300661465010333
AIF1	CDH26	1	-0.00614209636362653
AIF1	CFP	1	-0.00923699560020765
AIF1	CLEC10A	1	-0.0308935273057108
AIF1	CNPY3	1	-0.0456845657630177
AIF1	CRYBB1	1	-0.10090674533822501
AIF1	CSF1R	1	-0.069394942420258
AIF1	CYBB	1	-0.0814643747468787
AIF1	DOK2	1	-0.0287465519594172
AIF1	F13A1	1	-0.108496256705131
AIF1	FOLR2	1	-0.0679836998513784
AIF1	HCK	1	-0.0997392927263353
AIF1	IRF5	1	-0.0106914636005057
AIF1	ITGB2	1	-0.0519253663186287
AIF1	LST1	1	-0.11503203944082599
AIF1	LY86	1	-0.0718274358640711
AIF1	NCKAP1L	1	-0.0458445729539811
AIF1	NPL	1	-0.0285466529133003
AIF1	PLB1	1	-0.09385144424414098
AIF1	PLCB2	1	-0.0986492865215867
AIF1	PYCARD	1	-0.0295781829080802
AIF1	SELPLG	1	-0.0522465030308086
AIF1	SPI1	1	-0.0773185318377393
AIF1	STAB1	1	-0.0805892617277403
AIF1	STAC3	1	-0.0355694957951719
AIF1	TRPM2	1	-0.00516044314724516
AIF1	TYROBP	1	-0.11940887577046501
AIF1	VAMP8	1	-0.10413455034564899
AIF1L	AOC2	1	0.0366595772068455
AIF1L	CAPN2	1	-0.0499817217455299
AIF1L	CD36	1	-0.0471429619392295
AIF1L	DUSP7	1	-0.0385597967767624
AIF1L	EFNB1	1	-0.15314131627924
AIF1L	EPAS1	1	-0.0301466381801529
AIF1L	EPHB4	1	-0.016842500242446
AIF1L	ETS1	1	-0.000210906875381833
AIF1L	FABP4	1	-0.00518696239508028
AIF1L	FGF12	1	-0.0732885944757641
AIF1L	GNAI1	1	-0.0226084824500301
AIF1L	GNAZ	1	-0.10961906011082001
AIF1L	HSPA12B	1	-0.10288383317809499
AIF1L	JAG2	1	-0.0153218236215319
AIF1L	KDR	1	-0.0211689712547678
AIF1L	KIAA1217	1	-0.116635067106788
AIF1L	LIMS2	1	-0.0529621177804263
AIF1L	MFSD6	1	-0.0352534725851945
AIF1L	MYO7B	1	-0.0241306374057639
AIF1L	NES	1	-0.12844386873718
AIF1L	NIPAL3	1	-0.026394552758224003
AIF1L	PPAP2A	1	-0.005836041986687589
AIF1L	PREX1	1	-0.0248386233092551
AIF1L	SCN4A	1	-0.0599721972553899
AIF1L	SEMA3G	1	-0.0189006668273261
AIF1L	SGK223	1	-0.0277843214081555
AIF1L	SLC9A3R2	1	-0.177435710903079
AIF1L	SYNE2	1	-0.0780056213987214
AIF1L	TCN2	1	-0.0447914289832824
AIF1L	TMEM47	1	-0.0517833597376121
AIF1L	UACA	1	-0.0106814244435729
AIF1L	ZBTB46	1	-0.0371906290891989
AIFM3	SIGLEC1	1	-0.066831191361282
AIM2	BANK1	1	-0.0031592353999966897
AIM2	BLK	1	-0.0355992313492748
AIM2	CD19	1	-0.0135124600269756
AIM2	GAPT	1	-0.009394855709623371
AIM2	KIAA1551	1	-0.0110195854219717
AIM2	P2RX5	1	-0.0891934812747301
AIM2	PDGFRB	1	0.0403371871074987
AIM2	PRKCB	1	-0.0597727722849903
AIM2	SELL	1	-0.0315908769074566
AIM2	TBC1D10C	1	-0.0267430972796707
AIM2	TRAF3IP3	1	-0.0496108412393906
AIP	ANG	1	-0.0188518907544422
AIP	C1S	1	-0.0596951456803717
AIP	CBX7	1	-0.0514176274126077
AIP	CCNI	1	-0.12603523718947698
AIP	COL14A1	1	-0.0401260631737239
AIP	CPQ	1	-0.0620838474513915
AIP	CREG1	1	-0.0223466212930899
AIP	CTSF	1	-0.177824693747002
AIP	DHPS	1	-0.0326801666153103
AIP	DRAM2	1	-0.0404107052503276
AIP	F10	1	-0.0945167899532669
AIP	FXYD1	1	-0.19091103263795603
AIP	GLIPR1	1	-0.0212006042081871
AIP	LHFP	1	-0.0321214311179082
AIP	LRRC4B	1	-0.0174792241966387
AIP	MAP1LC3A	1	-0.00299104152700239
AIP	NBEAL2	1	0.00133545191906623
AIP	NFKBIL1	1	-0.0032805689067821
AIP	NPC2	1	-0.0608903787015488
AIP	PSMD14	1	0.0260208095055287
AIP	REC8	1	0.0344916179044675
AIP	SELM	1	-0.0474688458299115
AIP	TARBP1	1	0.0351177947128843
AIP	TYK2	1	0.0447786542704914
AIP	ZBTB18	1	0.0107769928476217
AIP	ZHX2	1	-0.0277460309077134
AIP	ZNF358	1	-0.00491723384641195
AJUBA	CNNM2	1	0.0224052606437525
AJUBA	FGF9	1	-0.0032514462548579102
AJUBA	HS3ST6	1	-0.0497357540372017
AJUBA	KCNA4	1	-0.0267522876675788
AJUBA	KLK1	1	-0.0160655203887687
AJUBA	RNF182	1	-0.0168246552291153
AJUBA	RSPO1	1	-0.0497360751079507
AK5	MYOZ1	1	-0.0054545544593703
AK5	NCS1	1	-0.0050000899095957
AKAP12	CLMN	1	-0.00670376668077627
AKAP12	ELK3	1	0.0015325071444412
AKAP12	FAM13A	1	-0.00812267595174066
AKAP12	FGFR1	1	-0.181360333109066
AKAP12	FLI1	1	0.0605241079533158
AKAP12	FOSL2	1	-0.0155119746454088
AKAP12	FOXC2	1	-0.0068418912003712
AKAP12	MECP2	1	-0.0116917659716082
AKAP12	MEOX1	1	2.4612379279254102e-05
AKAP12	NDRG1	1	-0.0415057332031728
AKAP12	NFIC	1	-0.00399013246381665
AKAP12	NOL3	1	-0.00183241440099048
AKAP12	SMTN	1	-0.0152060646236298
AKAP12	TMEM63A	1	-0.037430170625371004
AKAP12	TNS1	1	-0.0297736851997471
AKAP12	WDR27	1	-0.00879404949695849
AKAP13	ARID5B	1	-0.0553773173802997
AKAP13	CAB39L	1	-0.00451259862293262
AKAP13	LYN	1	0.00938293211405759
AKAP13	RGMA	1	-0.029733896012561
AKAP2	CAPN2	1	-0.0251399970497943
AKAP2	ETS1	1	-0.0635683158320026
AKAP2	FGF1	1	-0.0163442727423351
AKAP2	KCNQ1	1	-0.00476510765942193
AKAP2	KLF9	1	0.007359639836152209
AKAP2	KLHL15	1	0.0347205226205746
AKAP2	LDOC1L	1	-0.0296559497923178
AKAP2	MAP4K4	1	-0.0467044442841903
AKAP2	PHIP	1	0.0475408445031358
AKAP2	SAMD4A	1	-0.0226306661182215
AKAP2	SHB	1	-0.0581158959307612
AKAP6	CAMK2G	1	-0.00563025130369504
AKAP6	FOXL1	1	-0.0140725716758477
AKAP6	ITIH3	1	-0.00565985900240912
AKAP6	JPH2	1	-0.0833729704074822
AKAP6	KCNMA1	1	-0.0101784702796418
AKAP6	MPP7	1	-0.007197132323432441
AKAP6	MYOZ1	1	-0.0228858737730065
AKAP6	PDZRN4	1	-0.0217898150143742
AKAP6	RYR2	1	-0.025368975305605
AKAP8L	DAAM2	1	-0.0675230151093474
AKAP8L	ETV3	1	0.0774061274390137
AKAP8L	LMOD1	1	-0.0434294831779558
AKAP8L	PICK1	1	-0.0109700692819419
AKAP8L	SLC36A4	1	-0.0113697878568529
AKAP8L	TBC1D8	1	-0.00994068435385495
AKAP8L	TRMU	1	-0.0061735601763757
AKAP8L	TSC22D2	1	0.0422842094890781
AKAP8L	ZBTB9	1	0.11630106346111901
AKAP9	HIVEP2	1	0.0330017064182886
AKAP9	HIVEP3	1	0.00844568008447194
AKAP9	KLHDC2	1	-0.030306003079287998
AKAP9	RPGR	1	-0.0196527882079493
AKAP9	STK40	1	0.00113129819601608
AKT3	CCL8	1	0.0153405917058414
AKT3	CORO6	1	-0.0257861107387577
AKT3	CSF2RB	1	0.0255024393646636
AKT3	EFHD1	1	-0.0756045406088608
AKT3	FAM167B	1	0.0120480700371898
AKT3	FHL5	1	-0.0134768423476857
AKT3	HSD17B11	1	-0.00392516448631409
AKT3	LAMA2	1	-0.000260410515551479
AKT3	LIMD2	1	0.0159496658175984
AKT3	LRRC8A	1	-0.0277734339655357
AKT3	LST1	1	0.0232593389818531
AKT3	MXI1	1	-0.0359163336934016
AKT3	MYD88	1	0.026494345560590996
AKT3	MYO1D	1	-0.0984076321839252
AKT3	NKD1	1	-0.00456842207739534
AKT3	NR3C1	1	0.0022014739912584198
AKT3	PHC2	1	-0.14407792743477302
AKT3	PRKAB2	1	-0.0128136327487576
AKT3	RAB31	1	-0.012183017492861999
AKT3	RPS6KA2	1	-0.0591777907535563
AKT3	RRP12	1	0.00118777297131479
AKT3	SCNN1B	1	-0.0015574658213981
AKT3	SUN2	1	-0.0305026284437811
ALAD	APPL2	1	0.00637018592781569
ALAD	ASPH	1	-0.0514083413560561
ALAD	ATP6V0E2	1	-0.0930787252372641
ALAD	DEFB132	1	-0.0314548206637287
ALAD	EFHD1	1	0.0167726503695829
ALAD	EPB41L1	1	-0.064559083796287
ALAD	FCHO2	1	0.0045229138665758605
ALAD	GPR124	1	-0.00635559833675491
ALAD	HRASLS5	1	-0.0037212853635136297
ALAD	MAPK10	1	-0.00125712139137976
ALAD	MMD	1	-0.0196570356743628
ALAD	MYZAP	1	-0.0153399700375477
ALAD	SELENBP1	1	-0.0361490906291483
ALAD	SLC16A2	1	-0.16319767383399697
ALAD	SLC24A3	1	-0.0165102824390933
ALAD	SYNPO	1	-0.0892171283113345
ALAD	UNC119	1	-0.056624659753091
ALAS1	LFNG	1	-0.00426034072985469
ALAS2	CA1	1	-0.35802280320286495
ALB	APOA1	1	-0.10192074721230401
ALB	APOA2	1	-0.41168028937455603
ALB	APOC3	1	-0.248230117982971
ALB	FABP1	1	-0.0661604517006738
ALB	TTR	1	-0.19506562380940198
ALCAM	CASKIN2	1	0.00012138186408133798
ALCAM	CHIT1	1	-0.0167314195119387
ALCAM	COL8A2	1	-0.0436813966828946
ALCAM	MMP7	1	-0.0877530633022321
ALDH1A1	CTSK	1	-0.0362838512274799
ALDH1A1	FBLN5	1	-0.0371902058262636
ALDH1A2	BNC1	1	-0.0196159941846817
ALDH1A2	CDH3	1	-0.0450777760625169
ALDH1A2	CLDN1	1	-0.00384748144214841
ALDH1A2	DAPK1	1	-0.0352106624881794
ALDH1A2	FGF1	1	-0.0782374975588818
ALDH1A2	GALNT9	1	-0.0569664565851267
ALDH1A2	KLK11	1	-0.0754890448051395
ALDH1A2	KLK8	1	-0.0198571483887976
ALDH1A2	LRRN4	1	-0.0427263031621073
ALDH1A2	MGARP	1	-0.151938313079215
ALDH1A2	MSLN	1	-0.0565562648695623
ALDH1A2	MYRF	1	-0.021417770987092
ALDH1A2	S100A13	1	0.0161207118108633
ALDH1A2	SCN4B	1	-0.0102145539646574
ALDH1A2	SIX2	1	-0.0209779039394485
ALDH1A2	SPTBN1	1	-0.0051916846054742
ALDH1A2	TGM1	1	-0.00730270783810499
ALDH1A2	WARS	1	-0.0253239229882834
ALDH1A3	GFPT2	1	-0.156622935126689
ALDH1A3	MFI2	1	-0.0379967344203836
ALDH1L1	CIDEA	1	-0.0401331253250022
ALDH1L1	DCXR	1	-0.0392432012037128
ALDH1L1	ECHDC3	1	-0.0593754344473125
ALDH1L1	GLYCTK	1	-0.0615145176326301
ALDH1L1	GPD1	1	-0.000103558527833003
ALDH1L1	GPT	1	-0.0759441214516448
ALDH1L1	GYG2	1	-0.0109006426801405
ALDH1L1	HADH	1	-0.110620630360065
ALDH1L1	HEBP2	1	-0.007209959800440509
ALDH1L1	IZUMO4	1	-0.0668848082636111
ALDH1L1	LDHD	1	-0.0510721964171529
ALDH1L1	PC	1	-0.141520920775873
ALDH1L1	PCYT2	1	-0.0364088037723037
ALDH1L1	PNPLA2	1	-0.0382527163451328
ALDH1L1	S100B	1	-0.0288637813001453
ALDH1L1	TM7SF2	1	-0.0235254314883492
ALDH1L1	TST	1	-0.00904025847131698
ALDH1L2	ATF5	1	-0.0604664877886798
ALDH1L2	FASTK	1	-0.016166227765546
ALDH1L2	GARS	1	-0.0114387934890714
ALDH1L2	IL20RB	1	-0.000373217777996784
ALDH1L2	LONP1	1	-0.00526579584636533
ALDH1L2	LTA4H	1	0.0296621575642825
ALDH1L2	NCLN	1	-0.0118735007085928
ALDH1L2	PCOLCE	1	-0.0639564508100628
ALDH1L2	PYCR1	1	-0.0860114503207413
ALDH2	ATP9A	1	-0.0244811686326647
ALDH2	C1orf213	1	-0.0584531836767881
ALDH2	GLYAT	1	-8.11327630348968e-05
ALDH2	GPX4	1	-0.0280136151590915
ALDH2	MARCH3	1	-0.00767549178324821
ALDH2	MRAS	1	-0.00136054240480954
ALDH2	NAT8L	1	-0.138378217813613
ALDH2	PHGDH	1	-0.00292154433185328
ALDH2	RTN4	1	-0.00428593657786055
ALDH2	STK40	1	-0.0156375872253246
ALDH2	SULF1	1	-0.00571595000268694
ALDH2	SYNPO	1	-0.0209886560077862
ALDH2	TRIM8	1	-0.0273826987327853
ALDH2	VEGFB	1	-0.0319663244135869
ALDH3A1	ALDH3A2	1	-0.0455486485834012
ALDH4A1	ARHGDIG	1	-0.0448157472208785
ALDH4A1	CCDC3	1	-0.0251300832804087
ALDH4A1	GLYAT	1	-0.0857169885148191
ALDH4A1	MMD	1	-0.00574442155796549
ALDH4A1	PLXNB2	1	-0.0419723963690308
ALDH4A1	RGS11	1	-0.10789453414420501
ALDH4A1	SPATA9	1	-0.0133734174644911
ALDOA	ANKRD37	1	-0.0237012902858691
ALDOA	APLN	1	-0.0050209630705587
ALDOA	ARTN	1	-0.0109824888851524
ALDOA	CCNG2	1	-0.00709719361688172
ALDOA	CEP250	1	-0.0587819498864486
ALDOA	CHST15	1	-0.0300662365026377
ALDOA	CKMT2	1	-0.137929465621668
ALDOA	EGLN3	1	-0.0739066191727012
ALDOA	ENO1	1	-0.23655572973949696
ALDOA	FOXL1	1	-0.0487971013883195
ALDOA	GYS1	1	-0.0999940775624596
ALDOA	HIPK2	1	-0.0363858930407856
ALDOA	IGF1R	1	-0.00872670984784453
ALDOA	KDM3A	1	-0.0501277908344408
ALDOA	LONP1	1	-0.0242423471729277
ALDOA	PFKFB4	1	-0.10677625282041199
ALDOA	PHF21A	1	-0.0290967892059815
ALDOA	PPFIA4	1	-0.0224824647334459
ALDOA	PPP1R3C	1	-0.0122799717537407
ALDOA	PRSS53	1	-0.0557133817990172
ALDOA	PRUNE2	1	-0.00538077878432249
ALDOA	RAMP2	1	0.00375121123000297
ALDOA	RLF	1	-0.0212289608789106
ALDOA	SH3D21	1	-0.0738648124930915
ALDOA	SLC2A1	1	-0.0120108857680682
ALDOA	SMTN	1	-0.0247635425572741
ALDOA	TNS1	1	-0.0804772625844766
ALDOA	ZNF395	1	-0.0214676456173694
ALG3	CYP4B1	1	-0.0258798676868373
ALG3	CYP4X1	1	-0.000935980081116714
ALG3	NME1	1	-0.0026860117988553897
ALG3	SRM	1	-0.0910716985109214
ALG3	TACC1	1	-0.0149152990531966
ALG6	ASUN	1	-0.0218969784166877
ALG6	ATG4C	1	-0.0482687377911229
ALG6	C16orf45	1	0.00456441220685981
ALG6	C2CD5	1	-0.0210779590168491
ALG6	FPGT	1	-0.0483787916790844
ALG6	GAB2	1	0.0280103895182096
ALG6	GATAD2A	1	0.0578701148094912
ALG6	GIPC2	1	-0.00497997892368812
ALG6	GLMN	1	-0.0249459910572668
ALG6	INTS8	1	-0.0376173380347426
ALG6	KIAA1551	1	-0.00877323860778575
ALG6	MARCH7	1	-0.00157586789269761
ALG6	MECP2	1	0.0483623616860829
ALG6	PAM16	1	-0.0288741059813586
ALG6	PHF14	1	-0.109635470632654
ALG6	PRIMPOL	1	-0.00845923987319933
ALG6	SESTD1	1	0.0592043520591743
ALG6	SLC35A1	1	-0.0259508800032453
ALG6	TRMT10C	1	-0.0102269223993808
ALG6	TTC13	1	-0.0222595668950715
ALG6	ZBTB4	1	0.0422351007589284
ALKBH1	PDRG1	1	-0.0223499954153392
ALKBH7	NME3	1	-0.017010618589107
ALKBH7	PSMD14	1	0.0244780147672724
ALKBH7	PXMP2	1	-0.0243222952651628
ALKBH7	RPS5	1	-0.0605392977510271
ALOX15B	ANGPTL1	1	-0.0266177889166982
ALOX15B	FAM167B	1	0.00410728855189222
ALOX15B	FCHO2	1	-0.0209279242391226
ALOX15B	MERTK	1	-0.0213931232690397
ALOX15B	NEXN	1	-0.00158368476100656
ALOX15B	PNMT	1	-0.0597351529740677
ALOX15B	PPP1CB	1	-0.0365851096397061
ALOX15B	PTPRG	1	-0.0242135373133689
ALOX15B	RELB	1	0.00579537960230485
ALOX15B	SERPINF2	1	-0.0383217926713531
ALOX15B	SESN1	1	-0.00872612381125724
ALOX15B	SLC44A1	1	-0.0406112542323054
ALOX5	CSF3R	1	-0.0272759255093415
ALOX5	FGR	1	-0.00894088694332182
ALOX5	MYO1F	1	-0.0268891345073459
ALOX5	NCF2	1	-0.0692290806100039
ALOX5	S100A8	1	-0.0616384444368281
ALOX5	S100A9	1	-0.0272973021223213
ALOX5	S100P	1	-0.00699253625312356
ALOX5AP	CD53	1	-0.14952057810704503
ALOX5AP	LYVE1	1	-0.135471744216034
ALOX5AP	SLA	1	-0.0208293964967987
ALOX5AP	TBXAS1	1	-0.0313700299517621
ALPK3	ATP10A	1	-0.0504405818749508
ALPK3	PYGM	1	-0.0568134029981648
ALS2CL	FES	1	-0.0773052352842172
AMDHD2	GNPDA1	1	-0.0405472816534859
AMDHD2	MCOLN1	1	-0.0851778017133567
AMDHD2	TNFRSF14	1	-0.14914533167350302
AMHR2	CBLN2	1	-0.00695841107831862
AMHR2	HS3ST6	1	-0.0200259808507289
AMHR2	IL22RA1	1	-0.0793984319728529
AMHR2	LRRTM1	1	-0.09145968076360099
AMHR2	MAMSTR	1	-0.0175729409143967
AMHR2	RNF182	1	-0.00675669652926265
AMICA1	AOAH	1	-0.11795749919336801
AMICA1	APOBR	1	-0.0476853992477092
AMICA1	ARHGAP9	1	-0.0053404759934326295
AMICA1	ASGR2	1	-0.00478658739942933
AMICA1	CCR2	1	-0.0584497043610758
AMICA1	CD300LF	1	-0.028317814152917998
AMICA1	CD48	1	-0.04568636192587099
AMICA1	COL5A2	1	0.00141116609154843
AMICA1	CST7	1	-0.0153938949561896
AMICA1	FGD3	1	-0.0395209331436848
AMICA1	FYB	1	-0.10644648132601599
AMICA1	GAPT	1	-0.025914857605990004
AMICA1	GPSM3	1	-0.0108084139933135
AMICA1	IL18RAP	1	-0.00163707167031318
AMICA1	MNDA	1	-0.0713030387173438
AMICA1	MYO1F	1	-0.0974440173927699
AMICA1	NFE2	1	-0.0382055085295109
AMICA1	P2RY13	1	-0.0699236262141734
AMICA1	PROK2	1	-0.00834252864693468
AMICA1	PTPRC	1	-0.108099077125773
AMICA1	RGS18	1	-0.0830230599614661
AMICA1	S1PR4	1	-0.0134194730662271
AMICA1	SELL	1	-0.00889826865678371
AMICA1	SORL1	1	-0.00104287492047861
AMICA1	TMEM71	1	-0.0532691019558885
AMICA1	TRAF3IP3	1	-0.0629103083013499
AMICA1	VNN2	1	-0.0169972567353767
AMIGO2	ARHGEF9	1	-0.0035816798336007296
AMIGO2	ASB2	1	-0.0496544297097036
AMIGO2	C12orf75	1	-0.0449121792409629
AMIGO2	INHBA	1	-0.00341726209415728
AMIGO2	ITIH3	1	-0.0640042070755222
AMIGO2	KCNA5	1	-0.0473364506724331
AMIGO2	LGR6	1	-0.021213590839431997
AMIGO2	MYOCD	1	-0.0373415423665846
AMIGO2	NTF3	1	-0.0195896612593991
AMIGO2	NTRK3	1	-0.0257733578676089
AMIGO2	PLEKHO1	1	-0.0413264564526633
AMIGO2	RYR2	1	-0.0318341887670757
AMIGO2	SLC38A1	1	-0.00457573915797086
AMIGO2	TPM2	1	-0.0238487019434341
AMMECR1	CBX7	1	0.0008216374032330299
AMMECR1	NRXN2	1	0.0006287294799550559
AMMECR1	PHF1	1	0.0114430433725928
AMMECR1	SCNN1A	1	-0.0071354028937268095
AMN	ANKRD53	1	-0.0109763154624693
AMN	CITED1	1	-0.0573088169308357
AMN	CLTB	1	0.0531156303065091
AMN	CRYAB	1	0.0399794547403615
AMN	GLIS1	1	-0.00998567214827156
AMN	MAPKAPK3	1	-0.0159522374240649
AMN	NDRG4	1	-0.0558696592620113
AMN	NTSR2	1	-0.12029577843683001
AMN	PMM1	1	-0.0524236952248382
AMN	RNF175	1	-0.0465736176377992
AMN	SEMA3C	1	0.0242736437933265
AMN	SLC25A22	1	-0.0300379800459353
AMN	SLC27A2	1	-0.121411081499385
AMN	SMOC1	1	-0.0598860587990807
AMN	SNCG	1	0.00804609414728005
AMN	TTC36	1	-0.11308155882749198
AMOTL2	PXMP2	1	0.0158436391226085
AMOTL2	SLC35C1	1	-0.0480947425114102
AMPD2	NBEAL2	1	-0.00902972627934546
AMPD2	PTPRE	1	-0.0005498124236691731
AMPD2	SLC19A1	1	-0.0173566523219258
AMPD2	TCIRG1	1	-0.0971915798497611
AMPD3	SCML1	1	0.00977287481517069
AMPD3	TMEM139	1	-0.0353813663294538
AMPH	ASPHD1	1	0.0100518807254999
AMPH	C1S	1	-6.240816642594239e-05
AMPH	GALNT9	1	0.000437389153220114
AMPH	LPAR1	1	-0.0220513217500466
AMPH	MMP2	1	-0.0673379144581638
AMPH	SDK1	1	-0.00120414701036331
ANAPC4	NFIX	1	0.0106670451991488
ANAPC4	SMARCAD1	1	-0.0037541944229740397
ANG	ANTXR2	1	-0.0344380972837308
ANG	EPB41L4B	1	-0.00919945503217439
ANG	GPX3	1	-0.0834776225452437
ANG	PLXNB3	1	-0.007433975249395129
ANG	PMM1	1	-0.107275042667586
ANG	RAI2	1	-0.0215984912043112
ANG	RBPMS	1	-0.0301939907219498
ANG	TMEM132C	1	-0.0133245580771755
ANGEL1	BBS1	1	-0.0074412612079684
ANGEL1	FASTKD5	1	0.043833484515493994
ANGEL1	LMBR1L	1	-0.0238754970680791
ANGEL1	RXRB	1	-0.09969262410232302
ANGEL1	TIA1	1	-0.017752220235654
ANGPT4	ARHGAP6	1	-0.00226153243650077
ANGPT4	C1orf213	1	0.0764233232736705
ANGPT4	CNR1	1	-0.10025569932719999
ANGPT4	DAAM2	1	-0.0122178892540391
ANGPT4	EPAS1	1	-0.0026092627490214
ANGPT4	EPS8	1	-0.0636371399234137
ANGPT4	HAPLN2	1	-0.0323168769616947
ANGPT4	KALRN	1	-0.0354978775799707
ANGPT4	MBOAT7	1	0.0466305112911733
ANGPT4	MFGE8	1	-0.0144013367834915
ANGPT4	NTM	1	0.0208030125832884
ANGPT4	RERGL	1	-0.00437913348632579
ANGPT4	RGS6	1	-0.00653815613139783
ANGPT4	TIMP3	1	-0.0199760162926305
ANGPT4	TRAF2	1	0.0153745514474785
ANGPTL1	AOX1	1	-0.0133996288783212
ANGPTL1	ARMC8	1	-0.0048629084998706
ANGPTL1	CALU	1	-0.0539831092160798
ANGPTL1	CYP4B1	1	-0.0242540266668682
ANGPTL1	CYTH4	1	0.0355969852964695
ANGPTL1	DCLK2	1	0.0604969273692442
ANGPTL1	EFHD2	1	0.0216150548913783
ANGPTL1	ETNK2	1	-0.0350568706483696
ANGPTL1	FAM198A	1	-0.0951221670876461
ANGPTL1	FHL5	1	-0.016778664847304
ANGPTL1	GLUL	1	-0.0140257292431649
ANGPTL1	IL17RC	1	-0.0113413723337716
ANGPTL1	IL4I1	1	0.0211032861925429
ANGPTL1	KCNIP2	1	0.0384466195172112
ANGPTL1	KLF15	1	-0.010664595063626998
ANGPTL1	MAMDC2	1	-0.0347924733291755
ANGPTL1	MFGE8	1	-0.0784970910131908
ANGPTL1	NEK6	1	0.0031724996177669397
ANGPTL1	NEXN	1	-0.0698706393720131
ANGPTL1	NOTCH1	1	0.0166809279608997
ANGPTL1	PALLD	1	-0.101102233110672
ANGPTL1	PARM1	1	-0.111360484751377
ANGPTL1	PLEKHG5	1	0.00420040679758685
ANGPTL1	PNMT	1	-0.027200782719008998
ANGPTL1	PPM1F	1	0.0141105796474114
ANGPTL1	PTPRG	1	-0.0585549100726924
ANGPTL1	RAI2	1	-0.000313781279619452
ANGPTL1	RELB	1	0.0951227426738369
ANGPTL1	SERPINF2	1	-0.0368682409864937
ANGPTL1	SESN1	1	-0.0384087676865671
ANGPTL1	SLC39A11	1	-0.0593341340595775
ANGPTL1	SPOCK1	1	-0.0386611435878824
ANGPTL1	SRPX	1	-0.00842944262237803
ANGPTL1	TACC1	1	-0.0729177835494533
ANGPTL1	TCEAL1	1	-0.0238754989427887
ANGPTL1	TEAD4	1	0.0287451095737142
ANGPTL1	TFPI2	1	0.0398706781297354
ANGPTL1	TUBA8	1	-0.0208838687475653
ANGPTL1	WBSCR17	1	-0.0268053243169927
ANGPTL2	EPS8L2	1	-0.0035899086984800795
ANGPTL2	FABP4	1	-0.030686302091994
ANGPTL2	GNAZ	1	-0.00589121195753979
ANGPTL2	HMCN1	1	-0.008316225003362621
ANGPTL2	ITGB5	1	-0.0425662033186008
ANGPTL2	PPL	1	-0.00870106568263577
[truncated: 43,496 more rows]

## Sheet: Artery − Aorta
Name1	Name2	Edge type	Edge weight
A2M	C1R	1	-0.0986078921706065
A2M	ECEL1	1	-0.0021653916584809
A2M	HAPLN3	1	-0.0697641638781085
A2M	HEXIM1	1	0.0295963950552539
A2M	ITGA7	1	-0.11016761797315801
A2M	KALRN	1	-0.0016485489245696401
A2M	MRVI1	1	-0.0917473104255372
A2M	SPOCD1	1	-0.0141266308102521
A2M	TIMP1	1	-0.0009363233607247619
A4GALT	CHRD	1	-0.0212751071525759
A4GALT	MVP	1	-0.00269025828443209
A4GALT	NXPH3	1	-0.00138593955761977
AAAS	ABCB8	1	-0.0306386212475151
AAAS	CALM3	1	-0.0140683129489437
AAAS	ECHDC2	1	-0.024478235393543997
AAAS	GABBR1	1	-0.0473670705994169
AAAS	MRPL24	1	-0.0344175507472006
AAAS	NHLRC3	1	-0.0021493875227269897
AAAS	SLC25A27	1	-0.00472054964748361
AAAS	SNTA1	1	0.0402881247521926
AAAS	ZMAT1	1	-0.10444939447225399
AAK1	ASH1L	1	-0.0139638945403235
AAK1	ATXN7L1	1	-0.00824042318264764
AAK1	BICD1	1	-0.021630030172079002
AAK1	NFIC	1	-0.00470027054273665
AAK1	TNRC6C	1	-0.0156236034682887
AAR2	ABT1	1	-0.140633205784388
AAR2	HPS6	1	-0.0702587357394539
AAR2	NFIC	1	0.0066552352924883
AAR2	PLEKHA8	1	0.02724907028068
AAR2	TOE1	1	-0.00151755838535736
AAR2	TUSC1	1	-0.0625728996795473
AAR2	ZC3HC1	1	-0.0724328103439689
AAR2	ZNF609	1	0.00173290608029189
AAR2	ZNHIT2	1	-0.0456439803556338
AARS	ARHGEF2	1	-0.0400557955403028
AARS	CEBPG	1	-0.035600438717623
AARS	GARS	1	-0.14072485993386
AARS	GOT1	1	-0.0176101896187254
AARS	GTPBP2	1	-0.0624641628534946
AARS	HYOU1	1	-0.0249699346092064
AARS	IARS	1	-0.151760497671659
AARS	MANF	1	-0.0265235296623373
AARS	MARS	1	-0.111867869376505
AARS	PCK2	1	-0.0828678608990728
AARS	SLC1A4	1	-0.0545640820468998
AARS	SLC38A1	1	-0.0218641396663154
AARS	SLC3A2	1	-0.0633092024394725
AARS	SLC7A1	1	-0.0912040384791309
AARS	TRIB3	1	-0.0461397083971185
AARS	YARS	1	-0.15858912945159198
ABAT	ALDH1L1	1	-0.177502291012454
ABAT	ALPK3	1	0.0107858733385742
ABAT	BCAT2	1	-0.0781113551653675
ABAT	DCXR	1	-0.0283362810942296
ABAT	GCDH	1	-0.157915957286661
ABAT	IZUMO4	1	-0.16433951363198002
ABAT	LDHD	1	-0.0257213041006919
ABAT	NUDT16L1	1	-0.00167852761142872
ABAT	PARP2	1	0.0918605178830862
ABAT	PCYT2	1	-0.227545297628706
ABAT	PXMP2	1	-0.158616412191064
ABAT	RGAG4	1	-0.0264522004398243
ABAT	SLC17A9	1	0.0148111463916284
ABAT	TMEM237	1	-0.0205032093702357
ABAT	TMEM53	1	-0.008087764903602641
ABAT	TST	1	-0.007756846046132
ABCA1	ABCG1	1	-0.246702539974138
ABCA1	ADIRF	1	0.00297253577898231
ABCA1	DHCR24	1	0.0756785128680985
ABCA1	HMGCR	1	0.00763993701530953
ABCA1	IQGAP2	1	-0.0102868970407531
ABCA1	PLVAP	1	0.0360128468850053
ABCA1	RABGAP1	1	0.0196328113123494
ABCA1	RAPGEF3	1	0.00807850050087105
ABCA1	RBP5	1	0.0162510705547445
ABCA1	SMPDL3A	1	-0.0861401939246811
ABCA1	SQLE	1	0.10960922690736201
ABCA1	SREBF2	1	0.149314820527905
ABCA3	EXTL3	1	-0.00124530387608322
ABCA6	ABCA8	1	-0.378856440147301
ABCA6	ADAMTS5	1	-0.0159247506017454
ABCA6	AOX1	1	-0.0346128716276835
ABCA6	CYGB	1	-0.014065036774197
ABCA6	DCN	1	-0.0785036128606492
ABCA6	FGF10	1	-0.0123687371989195
ABCA6	HSD11B1	1	-0.00894224097673014
ABCA6	IGFBP4	1	-0.0212556813627355
ABCA6	LAMA2	1	-0.157045210410478
ABCA6	MGST1	1	-0.0125949872684494
ABCA6	NID1	1	-0.0173068769183881
ABCA6	PALM	1	-0.124196140336491
ABCA6	PAMR1	1	-0.0292661148248047
ABCA6	SLC43A1	1	-0.00961283778654515
ABCA6	STXBP1	1	-0.0104700927601166
ABCA6	TMEM100	1	-0.0126221480900888
ABCA6	XPNPEP2	1	-0.062307006981125
ABCA7	ARHGAP9	1	-0.0886485748043342
ABCA7	CD7	1	-0.0169779296429253
ABCA7	HMHA1	1	-0.0340361465857123
ABCA7	IL11RA	1	-0.0461930778595354
ABCA7	RNF166	1	-0.045604603830019005
ABCA8	AOX1	1	-0.00774372356580952
ABCA8	CFD	1	-0.0016872445667738699
ABCA8	FYN	1	-0.0178082244182571
ABCA8	ITPR3	1	-0.0156212018380376
ABCA8	MGST1	1	-0.0360904756696127
ABCA8	PALM	1	-0.0262290705235633
ABCA8	PODN	1	-0.0229897596174544
ABCA8	SCARA5	1	-0.168364384478915
ABCB4	CAMK2B	1	-0.100015285846635
ABCB4	CYTH3	1	-0.0488307678781857
ABCB4	DCHS1	1	-0.00544525190285422
ABCB4	FBXO4	1	-0.0279615520838144
ABCB4	MYO1E	1	-0.0420577176400157
ABCB4	PPP2R2B	1	-0.000930973153943506
ABCB4	PRRT2	1	0.0089651181948088
ABCB4	UBE4B	1	-0.0124303731365587
ABCB6	PLXNB1	1	-0.020062015642037
ABCB8	ADCK4	1	-0.0174470407755242
ABCB8	ANGEL1	1	-0.00120492972155894
ABCB8	AP1S1	1	-0.0103065119200708
ABCB8	CCNA2	1	0.0499280487109904
ABCB8	FAM168A	1	-0.00130597878061427
ABCB8	FDXR	1	-0.0181810931870012
ABCB8	FLI1	1	0.025905262436942997
ABCB8	GABBR1	1	-0.053414814480225
ABCB8	MRPL24	1	-0.0337097387587321
ABCB8	MZF1	1	-0.000291824344013404
ABCB8	NCLN	1	-0.022213039487715
ABCB8	OVGP1	1	0.13062382930778602
ABCB8	PEMT	1	-0.0158818524850434
ABCB8	TARSL2	1	0.0272051281967658
ABCB8	ZNF416	1	0.0312642690222667
ABCB8	ZNF581	1	0.009876997100931229
ABCB8	ZSCAN16	1	0.0708136944648977
ABCC1	FAM47E-STBD1	1	0.0149780543765437
ABCC1	ITGA11	1	-0.076130026022294
ABCC1	PLCL1	1	-0.0194879549321568
ABCC1	SRXN1	1	-0.0248802247847048
ABCC1	SSTR5	1	-0.0251481323166558
ABCC1	TIMP4	1	-0.00682699650758245
ABCC1	TXNRD1	1	-0.039313159679974
ABCC3	ADH6	1	-0.0276695715698968
ABCC3	CUEDC1	1	-0.000297476596116415
ABCC3	G6PD	1	-0.024316509395258
ABCC3	PPIC	1	-0.0165331396495274
ABCC3	TACSTD2	1	-0.023881813400348
ABCC5	LZTS2	1	0.0118516012174007
ABCG1	ACP5	1	-0.080727685978904
ABCG1	CCRL2	1	-0.0197788202944385
ABCG1	DHCR24	1	0.0259199483262279
ABCG1	PLA2G7	1	-0.0157693953240005
ABCG1	SDS	1	-0.0861657345115272
ABCG1	SMPDL3A	1	-0.0412035254685908
ABHD10	BRPF3	1	0.00132512951285544
ABHD10	CAPN5	1	-0.00049205251028946
ABHD10	PRKAB2	1	-0.0258865888645356
ABHD14A	METRN	1	-0.0537936389228192
ABHD14A	PTPN1	1	-0.0282950411798127
ABHD14A	SELENBP1	1	-0.0013899673724460698
ABHD14A	THEM6	1	-0.0160053037787015
ABHD3	CCBL1	1	-0.008241258989558641
ABHD4	CLASP2	1	-0.0271774199575538
ABHD4	LRRC17	1	0.00510405226867511
ABHD4	PDP1	1	0.0343407271006409
ABHD4	PLA2G2A	1	-0.0402411731280457
ABHD4	SYNE2	1	-0.0136723554862225
ABHD5	KIAA0895	1	-0.00037260606135047097
ABHD5	LGR4	1	-0.0157063447551286
ABI3BP	FBLN2	1	-0.00642126571870301
ABI3BP	PROCR	1	-0.0152188248679646
ABL1	ACTC1	1	0.0035797621036043298
ABL1	CREM	1	-0.0380675327654131
ABL1	FAM102B	1	-0.0131483893372432
ABL1	JMJD1C	1	-0.101086075272277
ABL1	MEDAG	1	-0.0480126917418915
ABL1	NDEL1	1	-0.0379865979617681
ABL1	PDE4B	1	-0.0177225162504214
ABL1	QRFP	1	-0.0238974726434025
ABL1	RABGAP1	1	0.0420088793296241
ABLIM1	ADD3	1	-0.0164715982540179
ABLIM1	GAS7	1	-0.0388239443713575
ABLIM1	GATA5	1	-0.00465043594685401
ABLIM1	GPBAR1	1	-0.00810769433617664
ABLIM1	IRAK3	1	-0.0364973641146903
ABLIM1	LRBA	1	-0.00501802583187948
ABLIM1	MSX1	1	-0.00963133505627487
ABLIM1	PALM	1	-0.10277420744919098
ABLIM1	PCDHGC3	1	-0.011782556033636999
ABLIM1	SLC43A1	1	-0.0276921412636352
ABLIM1	SPTBN1	1	-0.07486509430376899
ABLIM1	STXBP1	1	-0.0352239251660145
ABLIM1	TMEM100	1	-0.0398382328911873
ABLIM1	TRPV2	1	0.00816208159971106
ABLIM3	CARTPT	1	-0.0270363079826542
ABLIM3	KIF13B	1	-0.11699545060836
ABR	DMPK	1	-0.00122138920456645
ABR	DUSP7	1	-0.0365238970368633
ABR	INPP5A	1	-0.0955607643793834
ABR	IQSEC1	1	-0.0542410685101718
ABR	PLAGL1	1	0.0023508785996360004
ABR	PLSCR4	1	0.0010122728933198099
ABR	PLXNB1	1	-0.0338231971056127
ABR	PRDM16	1	-0.0235537298253578
ABR	SYT8	1	0.000345229792179106
ABRA	ARID5A	1	-0.0116353943558856
ABRA	ARID5B	1	-0.0336857007314587
ABRA	DNAJB5	1	-0.0398556570477849
ABRA	FILIP1L	1	-0.0160232455292539
ABRA	FRY	1	-0.0874389939558155
ABRA	MYOCD	1	-0.0145240333803454
ABRA	RANBP9	1	-0.0151845822861897
ABRA	STK38L	1	-0.0649054263660667
ABRA	ZBTB21	1	-0.0162794503070784
ABRACL	ARHGEF2	1	-0.0344310869004736
ABRACL	CNTFR	1	0.0038724192695962396
ABRACL	CSK	1	-0.0160841779031951
ABRACL	EHD4	1	-0.0610743015837851
ABRACL	RIN3	1	-0.0070206833082749895
ABT1	BRIX1	1	-0.0073921461613528595
ABT1	C18orf21	1	-0.0127116612800206
ABT1	CBLL1	1	-0.0215291875413704
ABT1	CLP1	1	-0.10925542464042
ABT1	EID2	1	-0.0315303718007182
ABT1	FASTKD5	1	-0.0197022194583507
ABT1	GTF2B	1	-0.0892099438411572
ABT1	HPS6	1	-0.0062675639034557
ABT1	MAD2L1BP	1	-0.081588645824883
ABT1	MAOA	1	0.0197214038486433
ABT1	MED30	1	-0.117991517123807
ABT1	MED9	1	-0.005731727225594879
ABT1	NCOA5	1	-0.0116434304984997
ABT1	NDNL2	1	-0.0533073240187523
ABT1	OTUD1	1	-0.0065709152544911895
ABT1	SMG8	1	-0.0588607982047452
ABT1	SRSF7	1	-0.0294778300180381
ABT1	THAP1	1	-0.0264020090878409
ABT1	TRMT10C	1	-0.123017512631434
ABT1	TRMT6	1	-0.0151473481686779
ABT1	TUSC1	1	-0.0374072334133562
ABT1	TWISTNB	1	-0.0162964547427179
ABT1	USPL1	1	-0.0314087156520012
ABT1	UTP3	1	-0.00541266041090165
ABT1	VWA9	1	-0.0295656114840431
ABT1	ZNHIT2	1	-0.0269513474881312
ABTB1	CNNM3	1	-0.0197051594571158
ABTB1	FAM214A	1	-0.0397283063935988
ABTB1	KLHDC2	1	-0.0480197076615886
ABTB1	MAFK	1	-0.008609117712408259
ABTB1	PINK1	1	-0.0132392950735236
ABTB1	SPSB3	1	-0.119456954825544
ABTB1	ULK1	1	-0.00794610512600465
AC107021.1	ANKRD37	1	-0.0490708426810983
AC107021.1	BHLHE41	1	-0.0073673688643454
AC107021.1	KDM3A	1	-0.0349185953605436
AC107021.1	OXSM	1	-0.0103373916294623
AC107021.1	ZNF395	1	-0.00146492388869605
AC117395.1	PFN2	1	-0.18217389704107798
ACACA	DHCR24	1	-0.0100238625387061
ACAD10	RECQL5	1	-0.0264349393304566
ACAD11	CLIP3	1	-0.0132770718706183
ACAD11	PNISR	1	-0.0416804840233341
ACADL	C2orf44	1	0.00568563796073575
ACADL	C2orf88	1	-0.0342804971148069
ACADL	GREB1L	1	-0.0902901828018523
ACADL	KANSL1L	1	-0.168304111583524
ACADL	LMOD1	1	-0.0513088579240737
ACADL	NFIA	1	-0.009969081011278259
ACADVL	CAT	1	-0.0887019234808856
ACADVL	ECH1	1	-0.261291699185657
ACADVL	MLYCD	1	-0.0246556268868033
ACADVL	PINK1	1	-0.00388846396242503
ACADVL	TMED5	1	-0.0561722897349134
ACAP3	ENDOG	1	-0.00635883475034418
ACAP3	FBXL7	1	-0.0186066944884428
ACAP3	KLHL17	1	-0.000599382354434918
ACAP3	LRCH4	1	-0.064611497569883
ACAP3	MTR	1	0.00699969096636498
ACAP3	TMEM246	1	0.0325234599301647
ACAP3	ZNF318	1	-0.0242220716600205
ACE2	CIDEA	1	-0.0449577802048392
ACE2	CILP	1	-0.209451662925298
ACE2	CNTFR	1	-0.0109438761909913
ACE2	FGF10	1	-0.0207704545616547
ACE2	GPD1	1	-0.0218636099846394
ACE2	HAS2	1	-0.0558439209259673
ACE2	ITGA11	1	-0.0115802202966408
ACE2	LGALS12	1	-0.0523029210355226
ACE2	LIPE	1	-0.0142301304532089
ACE2	NID1	1	-0.104134708979916
ACE2	NTRK1	1	-0.0875787832258513
ACE2	SMTNL2	1	-0.00624825910620688
ACE2	SRPX	1	-0.00401240790995159
ACE2	TNFSF13B	1	0.016556150469898
ACIN1	BRD8	1	-0.10925450299552802
ACIN1	KCNIP3	1	0.0127384827646248
ACIN1	RBM5	1	-0.0859458184999363
ACIN1	RNPEPL1	1	0.00275559500631355
ACKR3	CSRNP1	1	-0.0694392918659014
ACKR3	EMP1	1	-0.10039192482811699
ACKR3	FGF18	1	-0.0358402616248742
ACKR3	NR4A3	1	-0.0140049773771458
ACKR3	PIM1	1	-0.00600647484565216
ACKR3	RNF122	1	-0.0205205029509902
ACKR3	UAP1	1	-0.0245199529101329
ACLY	C18orf21	1	0.0187006118485756
ACLY	CNOT11	1	0.0646337398754911
ACLY	DHCR24	1	-0.0429589842666998
ACLY	EBF1	1	-0.0290074469452729
ACLY	EBF2	1	-0.0303902092526333
ACLY	MAOA	1	-0.0825260305064677
ACLY	NID1	1	-0.00718244638990733
ACLY	PCYT2	1	-0.0294651569141513
ACLY	PTPRG	1	-0.015088403626
ACLY	SCFD2	1	-0.0131062298759379
ACLY	SORT1	1	-0.0254405779278131
ACOX2	C17orf59	1	0.0644907834211804
ACOX2	PLCD1	1	0.0527295486742081
ACOX2	VAMP2	1	0.00194574696682325
ACOX3	ANKRD35	1	0.0214573375507266
ACOX3	CABIN1	1	0.0109029809954107
ACOX3	IFT43	1	-0.00332683190836629
ACOX3	NFIC	1	0.0697743496100533
ACOX3	PLEKHO1	1	-0.0228863163414226
ACOX3	SAMD4A	1	-0.0638341043473705
ACOX3	UBTF	1	0.0347953853574201
ACOX3	USP20	1	-0.0386144530500782
ACP2	ACP5	1	-0.0298840474035744
ACP2	AP1B1	1	-0.0141011482224721
ACP2	CCL18	1	-0.0011711527171035
ACP2	CCRL2	1	-0.0477439571473831
ACP2	CLN6	1	-0.0313783848055312
ACP2	CTSZ	1	-0.0798663337716228
ACP2	FUCA1	1	-0.0321036767413451
ACP2	GPR137B	1	-0.0206941750323273
ACP2	GRN	1	-0.0261233494508387
ACP2	GTPBP2	1	-0.0038295341310681397
ACP2	LIPA	1	-0.11811071443594
ACP2	MFSD1	1	-0.0009095251080615301
ACP2	PLA2G15	1	-0.0143461220565843
ACP2	RASL10A	1	-0.019264994707445
ACP2	SLC15A3	1	-0.0223999038048639
ACP2	SLC18B1	1	-0.0137308607619825
ACP2	SMPDL3A	1	-0.0842950254387078
ACP2	ST14	1	-0.038261174948366
ACP5	ADAMDEC1	1	-0.0813705202418167
ACP5	ASAH1	1	-0.0864413607055359
ACP5	CAPG	1	-0.037503686133291
ACP5	CCL18	1	-0.237578007219912
ACP5	CCRL2	1	-0.0164840363557679
ACP5	CD28	1	-0.030041086223383
ACP5	CD300LF	1	-0.0026065792519411103
ACP5	CD52	1	-0.046984341592888
ACP5	CD80	1	-0.0385206955116388
ACP5	CHIT1	1	-0.18507255795572602
ACP5	DHRS9	1	-0.0152467840110794
ACP5	FUCA1	1	-0.00979940290487545
ACP5	HLA-DMB	1	-0.125529578007235
ACP5	IGSF6	1	-0.16655702956555302
ACP5	IQGAP2	1	-0.0734001172752004
ACP5	LIPA	1	-0.10706523629359697
ACP5	NPL	1	-0.0563262196359666
ACP5	NR1H3	1	-0.0046257892433843205
ACP5	PKD2L1	1	-0.0355700346645738
ACP5	PLA2G7	1	-0.23555237736234802
ACP5	RASL10A	1	-0.0330277586022236
ACP5	SDS	1	-0.15810609509235
ACP5	SLC15A3	1	-0.0280021243297395
ACP5	SLC18B1	1	-0.0179750528533892
ACP5	SMPDL3A	1	-0.079713424590052
ACP5	ST14	1	-0.0114266912138175
ACP5	TBC1D2	1	-0.0147655909571295
ACP5	TFEC	1	-0.0316733549207118
ACP5	TMEM86A	1	-0.0791327982436218
ACPL2	TP53BP2	1	-0.0021001961821015603
ACSL1	AGPAT2	1	-0.0963446575739139
ACSL1	CIDEA	1	-0.00964883644231751
ACSL1	CYB5A	1	-0.0427243103094061
ACSL1	DGAT2	1	-0.0593243135378558
ACSL1	DUSP4	1	-0.0307984839701901
ACSL1	ELOVL5	1	-0.0285410297899822
ACSL1	GPAM	1	-0.0008337003054760821
ACSL1	IRAK3	1	-0.0596747189369092
ACSL1	KLF13	1	-0.0669368354132697
ACSL1	LGALS12	1	-0.014807964168195001
ACSL1	MARC1	1	-0.0158525154287254
ACSL1	MME	1	-0.0395955350401357
ACSL1	MRAP	1	-0.0143835539437997
ACSL1	SAMSN1	1	-0.0843017102780165
ACSL1	THEMIS2	1	-0.00812203782170199
ACSL1	TTYH3	1	-0.0158243398711144
ACSL5	ECSCR	1	-0.0506948893891227
ACSL5	MPZL2	1	-0.0186264214015441
ACSL5	RAMP2	1	-0.0580495131095638
ACSL5	S1PR1	1	-0.008801329437107
ACSS1	LZTS3	1	0.0040363366895339895
ACSS1	TRMT6	1	0.0013935580003788198
ACSS1	ZFP36L2	1	-0.0165251736727126
ACSS2	DBI	1	-0.0232118590720785
ACTA1	CKM	1	-0.238168973488845
ACTA1	KLHL41	1	-0.0792514400548789
ACTA1	MB	1	-0.294784794399655
ACTA1	MYBPC1	1	-0.0912761182183058
ACTA1	MYL1	1	-0.14318711827308703
ACTA1	MYL2	1	-0.160065885854601
ACTA1	MYL3	1	-0.0272035452092931
ACTA1	TNNC1	1	-0.14496284715330898
ACTA1	TNNC2	1	-0.0205811133608666
ACTC1	ADRA1D	1	-0.0111141289408622
ACTC1	ATOH8	1	-0.004462846351876971
ACTC1	DDR1	1	-0.0182878300744168
ACTC1	ENG	1	-0.0767157383808839
ACTC1	HSPB8	1	-0.0558226600283585
ACTC1	KIAA1671	1	-0.021467349344459
ACTC1	NPTX2	1	-0.00457216904600262
ACTC1	REEP1	1	-0.0715008810456475
ACTC1	SMAD6	1	-0.0173688947681579
ACTC1	SOST	1	-0.0298749158146275
ACTC1	STX11	1	0.0027309151170356897
ACTC1	YWHAH	1	-0.16591194005665302
ACTG2	CFL2	1	-0.00699538449435395
ACTG2	CNN1	1	-0.22384346854971499
ACTG2	COL4A2	1	-0.0592683253486382
ACTG2	CSRP1	1	-0.0407667407300356
ACTG2	CYFIP2	1	-0.0234961260211041
ACTG2	DPYSL3	1	-0.0112365061866025
ACTG2	GLIPR2	1	-0.10541723195209801
ACTG2	ITGA7	1	-0.00897596227524726
ACTG2	NPTN	1	-0.0313986257044893
ACTG2	PCP4	1	-0.0671089618620655
ACTG2	PDLIM7	1	-0.0653546402204098
ACTG2	PIP5K1C	1	-0.0201670984890796
ACTG2	PRUNE2	1	-0.0650824977830647
ACTG2	RAB6B	1	-0.0081794680435071
ACTG2	RAB9B	1	-0.0201681713694184
ACTG2	RASL12	1	-8.49198038726517e-05
ACTG2	RASSF3	1	-0.00100755516779231
ACTG2	RBPMS	1	-0.000947492875123655
ACTG2	RGAG4	1	0.0283038318984143
ACTG2	SH3GL3	1	-0.0196055556514595
ACTG2	SPOCD1	1	-0.0170509937216155
ACTG2	SYNPO2	1	-0.0529820236052897
ACTG2	TAGLN	1	-0.00294167445253808
ACTG2	TC2N	1	-0.00478727044137507
ACTG2	TNC	1	-0.00790093429436168
ACTG2	TPM2	1	-0.00635649623684057
ACTG2	TPP1	1	-0.0358070058986261
ACTG2	VASP	1	-0.0239779358301336
ACTG2	WDR1	1	-0.0212022388578628
ACTG2	ZYX	1	-0.10940319490496302
ACTN2	BTG3	1	-0.0018589994431621399
ACTN2	DNAJB5	1	-0.0801986853867599
ACTN2	MYOCD	1	-0.0828869351929107
ACTN2	PRICKLE2	1	0.0238364992646405
ACTN2	RAB32	1	-0.00721686513747715
ACVR1	DAB2IP	1	-0.00328260577209037
ACVR1	PCED1A	1	0.0363151607945934
ACY1	DAK	1	-0.121348957147702
ADA	CD248	1	-0.00720828024267722
ADAM15	LCN10	1	-0.0105875741350084
ADAM15	NPDC1	1	-0.00203093275214859
ADAM15	PKN3	1	-0.0264183184296247
ADAM15	RAMP2	1	-0.0588381783270824
ADAM19	GRASP	1	0.0582978984828212
ADAM19	ITPRIP	1	0.00150607420427612
ADAM19	PER1	1	0.0355953796504852
ADAM19	PIK3R3	1	0.0106253202176937
ADAM19	SDPR	1	0.0139870532939892
ADAM19	SIK1	1	0.0290593492317788
ADAM22	CDH8	1	-0.0339684145445916
ADAM22	FAM84A	1	-0.0888322700085426
ADAM22	SH3GL3	1	-0.0366551504771242
ADAM22	SNAP91	1	-0.00941974125029421
ADAM22	VANGL2	1	-0.048811378392362
ADAM28	CD72	1	-0.0663212455250149
ADAM28	CD86	1	-0.038136345826917
ADAM28	CPVL	1	-0.0505836680287516
ADAM28	EDNRB	1	0.00433011626383604
ADAM28	EPHA4	1	0.0294532072192034
ADAM28	EVI2A	1	-0.0542163853657876
ADAM28	GPRIN3	1	-0.032701613004459
ADAM28	HLA-DMA	1	-0.0868281020406355
ADAM28	HLA-DMB	1	-0.11671274898884698
ADAM28	HLA-DPA1	1	-0.0190769094894617
ADAM28	HLA-DPB1	1	-0.0801588356873796
ADAM28	HLA-DRA	1	-0.0489643494402002
ADAM28	LAPTM5	1	-0.00922395447822766
ADAM28	MSR1	1	-7.48971933238751e-05
ADAM28	TGFBR2	1	0.0076186668061541
ADAM28	TYROBP	1	-0.04940200437771
ADAM28	VMO1	1	-0.0899745815236307
ADAM28	ZMYND15	1	-0.0764842901085042
ADAM8	AQP9	1	-0.131293293927715
ADAM8	C15orf48	1	-0.0474312215134998
ADAM8	GIMAP8	1	0.0117058586654469
ADAM8	IL2RG	1	-0.004270546600426171
ADAM8	NBEAL2	1	-0.0106952160099064
ADAM8	NCF2	1	-0.0127177761391955
ADAM8	PADI2	1	-0.0163167597386526
ADAM8	SEMA4A	1	-0.13867215827260698
ADAM8	TREM1	1	-0.11846989666921301
ADAM9	BCAT1	1	-0.0062464767233324295
ADAM9	CCDC80	1	-0.007356033378222671
ADAM9	COL1A2	1	-0.0260669769337412
ADAM9	COL4A1	1	-0.0408765428945308
ADAM9	CTSA	1	-0.000790756664936981
ADAM9	DMXL2	1	-0.0351207295082325
ADAM9	FBN1	1	-0.004253514207122
ADAM9	GLIPR2	1	-0.00996095240259255
ADAM9	GNG12	1	-0.10224490275328399
ADAM9	HIF1A	1	-0.0120996348822686
ADAM9	ITGA9	1	-0.000320602849368426
ADAM9	PLCB4	1	0.0552413232745844
ADAM9	PPIC	1	-0.0319241262124892
ADAMDEC1	CD28	1	-0.0697864796841215
ADAMDEC1	CHIT1	1	-0.121511759368064
ADAMDEC1	LIPA	1	-0.0205703452646798
ADAMDEC1	PLA2G7	1	-0.15867399011590302
ADAMTS1	BTG2	1	-0.0575335797407689
ADAMTS1	CCNL1	1	-0.0307193813539027
ADAMTS1	CDKN1A	1	-0.0178273965193491
ADAMTS1	CSRNP1	1	-0.0241426606605852
ADAMTS1	CYR61	1	-0.027810415237012002
ADAMTS1	ETV3	1	-0.0242506239108338
ADAMTS1	FOSL2	1	-0.17662654634526503
ADAMTS1	ID4	1	-0.10708820952289899
ADAMTS1	ITPRIP	1	-0.0416845271893821
ADAMTS1	JUNB	1	-0.0411756923342735
ADAMTS1	MESDC1	1	-0.00255282968222408
ADAMTS1	MYC	1	-0.161182283639587
ADAMTS1	NDEL1	1	-0.0370064125562696
ADAMTS1	NR4A2	1	-0.118563765637105
ADAMTS1	PPAP2B	1	-0.026245551707206
ADAMTS1	PTGS2	1	-0.0240642678951058
ADAMTS1	RHOB	1	-0.0136781644297692
ADAMTS1	SAT1	1	-0.122345993217118
ADAMTS1	SOCS2	1	-0.00589747029444482
ADAMTS1	SPRY2	1	-0.0219911976953741
ADAMTS1	TGIF1	1	-0.0480060847059032
ADAMTS13	P2RX6	1	-0.0101805590151688
ADAMTS15	ARRDC3	1	-0.0108173292998692
ADAMTS15	B4GALT1	1	-0.12568763010763198
ADAMTS15	BCOR	1	-0.0275664256800001
ADAMTS15	C15orf39	1	-0.000520770670918547
ADAMTS15	CASP12	1	0.10683873200899001
ADAMTS15	GATA6	1	-0.0660523988046435
ADAMTS15	NFIL3	1	-0.024185869242809
ADAMTS15	RAB20	1	-0.0240912129201559
ADAMTS15	RAB3A	1	-0.000830860448315273
ADAMTS15	RARA	1	-0.0789246091791965
ADAMTS15	SNAI2	1	-0.0203146932635821
ADAMTS2	CRLF1	1	-0.0880428558673074
ADAMTS2	FBLN2	1	-0.0546795709951264
ADAMTS2	LAMA3	1	-0.00869042499371305
ADAMTS2	NID1	1	-0.112974976505122
ADAMTS2	SMARCD2	1	-0.00443957000646401
ADAMTS2	TPPP3	1	-0.0004982457421707259
ADAMTS3	EMILIN1	1	-0.0133592431903351
ADAMTS5	CADM3	1	-0.0300099142347856
ADAMTS5	EBF2	1	-0.11033782783515401
ADAMTS5	FAM65C	1	-0.0489559478536255
ADAMTS5	FBN1	1	-0.0403281555153209
ADAMTS5	IL2RG	1	0.020788663554133998
ADAMTS5	ITPR3	1	-0.0705288737602365
ADAMTS5	NID1	1	-0.0596687210326417
ADAMTS5	PCSK6	1	-0.00431055308065746
ADAMTS5	SCARA5	1	-0.00642543664937499
ADAMTS5	SLPI	1	-0.0242777213274872
ADAMTS5	VIT	1	-0.0268438572845928
ADAMTS5	XPNPEP2	1	-0.0607924248065699
ADAMTS6	CYP2R1	1	-0.00620006241354576
ADAMTS8	ARHGAP44	1	0.0580725283921949
ADAMTS8	BLNK	1	-0.00039426302568456803
ADAMTS8	CDO1	1	0.00308966168075474
ADAMTS8	COL27A1	1	-0.0780610395222172
ADAMTS8	COLCA2	1	-0.0988395644817346
ADAMTS8	CORO6	1	0.0181268055175391
ADAMTS8	DHRS3	1	-0.0162902916863363
ADAMTS8	DPYSL3	1	-0.0396221528586547
ADAMTS8	EPHA4	1	0.0371116671046438
ADAMTS8	JHDM1D	1	0.032411720175167996
ADAMTS8	SDC3	1	-0.00210565491000215
ADAMTS8	SLC43A1	1	0.0301049284458073
ADAMTS8	SNED1	1	0.0559932047597147
ADAMTS8	VPS13D	1	-0.0456034975077708
ADAMTSL1	THSD7B	1	-0.000751074586628275
ADAMTSL4	CALU	1	-0.0326876957564453
ADAMTSL4	CCDC167	1	-0.0120764366521877
ADAMTSL4	CCT2	1	0.0166035785535843
ADAMTSL4	KDELR3	1	-0.0204485723755535
ADAMTSL4	NHLRC3	1	-0.000413702479788822
ADAMTSL4	SEC11C	1	-0.00465453129654096
ADAMTSL4-AS1	CCNL1	1	-0.0172417359917964
ADAR	DDX60	1	-0.008073720993110241
ADAR	HERC6	1	-0.0802301454206416
ADAR	IFI44L	1	-0.0314356608794048
ADAR	LIG3	1	-0.00247712540883832
ADAR	MX1	1	-0.0282636606486965
ADAR	OAS2	1	-0.0194448448352783
ADAR	SAMD9L	1	-0.0161974082466566
ADAR	SLC4A2	1	0.0813254817490969
ADAR	SP110	1	-0.0851532601925868
ADAR	STAT1	1	-0.206547783241787
ADAR	TRIM25	1	-0.0109207321129197
ADARB1	FGF14	1	-0.0252101210490304
ADAT2	MFAP3	1	0.0361246462610551
ADAT2	PHF1	1	0.0115256567743524
ADCK1	C2orf44	1	0.00573003276800125
ADCK1	FILIP1	1	-0.00215208695966022
ADCK1	GREB1L	1	-0.0331593050221563
ADCK1	MFSD3	1	-0.0314562623904714
ADCK1	SLC25A35	1	-0.00404464953861641
ADCK1	UQCC2	1	-0.0395104182010848
ADCK4	GABBR1	1	-0.0371696595602073
ADCK4	HEMK1	1	-0.0058931206811129
ADCK5	KIFC2	1	-0.0163280293329742
ADCY2	RIMS1	1	-0.0510116227603936
ADCY3	AOX1	1	-0.0349149674471458
ADCY3	CXCL14	1	-0.0280913209090149
ADCY3	MAN1A1	1	-0.0146728873800531
ADCY3	MARCH3	1	-0.00238422035841538
ADCY3	PALM	1	-0.0209574746275362
ADCY3	SVEP1	1	-0.024829962903362996
ADCY3	TGFBR2	1	-0.00650001960601801
ADCY3	WNT11	1	-0.00387634577506413
ADCY3	XPNPEP2	1	-0.0115298236636273
ADCY4	C10orf128	1	-0.11894509028334599
ADCY4	CARD10	1	-0.009401789481969479
ADCY4	CCM2L	1	-0.0477571067132467
ADCY4	CDH5	1	-0.0016960385413098099
ADCY4	CYYR1	1	-0.04488686790802401
ADCY4	DARC	1	-0.0353078439441379
ADCY4	ECSCR	1	-0.0640833218695322
ADCY4	EGFL7	1	-0.0575861504579367
ADCY4	EPHB4	1	-0.0243052625386809
ADCY4	FAM110D	1	-0.0452314912547219
ADCY4	FAM162B	1	-0.0291649643940028
ADCY4	GIMAP7	1	-0.0964311988472382
ADCY4	GIMAP8	1	-0.0134937241585247
ADCY4	GPR146	1	-0.0011947400367705
ADCY4	HSPA12B	1	-1.4453018986948499e-05
ADCY4	IFI27	1	-0.0466889177224123
ADCY4	ITGB4	1	-0.0847864885215971
ADCY4	KANK3	1	-0.0996030240058398
ADCY4	LCN10	1	-0.0174454038905963
ADCY4	LGI4	1	-0.0129639703928786
ADCY4	NOSTRIN	1	-0.0368073484773577
ADCY4	PKN3	1	-0.0206435288762415
ADCY4	PLVAP	1	-0.0336824850961344
ADCY4	RAMP2	1	-0.0740103350879745
ADCY4	RAMP3	1	-0.0656174574344239
ADCY4	SH2D3C	1	-0.0466252349032407
ADCY4	SHANK3	1	-0.18285961886506402
ADCY4	SLCO2A1	1	-0.08406380030315598
ADCY4	SPNS2	1	-0.0240793057273402
ADCY5	SMARCD3	1	-0.017277643342266003
ADCY7	LUC7L	1	0.0317156402385753
ADCY7	SH2B2	1	0.0175920566819345
ADCY7	TST	1	0.00532176831158096
ADCY9	CABLES1	1	-0.0416512491031993
ADCY9	LRRC20	1	-0.0168398048978392
ADCY9	ZBTB22	1	0.0365328688421781
ADCYAP1	CPA3	1	-0.0304655078647532
ADCYAP1	HDC	1	-0.128120774330208
ADD3	ANKRD35	1	-0.00511047447919424
ADD3	DBN1	1	-0.0390762367957219
ADD3	DPYSL2	1	-0.0237577246861976
ADD3	FRY	1	0.0089869102628017
ADD3	LAMA2	1	-0.0102442810706812
ADD3	NYNRIN	1	-9.98844922323432e-05
ADD3	PALM	1	-0.0556785139394742
ADD3	PCDHGC3	1	-0.019196662070121998
ADD3	SRF	1	0.0050599652133544795
ADHFE1	ALDH2	1	-0.0199379103118071
ADHFE1	PXMP2	1	-0.150678666629385
ADIRF	NDUFA4L2	1	-0.00824940992942401
ADIRF	NES	1	-0.00118284727717026
ADIRF	NRGN	1	-0.00943838974663596
ADIRF	SERPINI1	1	-0.041259423886482
ADIRF	SNCG	1	-0.325076649155005
ADIRF	SREBF2	1	-0.015309407686172
ADM	ANKRD37	1	-0.060665651550297996
ADM	BHLHE40	1	-0.11632547523708099
ADM	BHLHE41	1	-0.0226208762568453
ADM	EDN2	1	-0.0924241235797235
ADM	EGLN3	1	-0.0599297629430101
ADM	ERRFI1	1	-0.023087782636572997
ADM	FAM117A	1	-0.00962997253997828
ADM	GADD45B	1	-0.0266686190439559
ADM	HES1	1	-0.0455505162679989
ADM	MRPL17	1	-0.00337821764033705
ADM	SLC2A1	1	-0.108246722493261
ADM	SMAD7	1	-0.0162147849687272
ADM	THAP8	1	-0.0223237423861458
ADM	VEGFA	1	-0.0444058325105179
ADM	ZFP36L1	1	-0.0628879856352032
ADM	ZNF395	1	-0.0487617151574757
ADM5	CLDN5	1	-0.0177438822030195
ADM5	TACR1	1	-0.0252928774087957
ADM5	TESC	1	-0.0309350833713341
ADORA2A	RTN4RL1	1	0.0157023684892925
ADORA3	AP1B1	1	-0.0254847822066551
ADORA3	AP2S1	1	-0.0249788585221495
ADORA3	FMN1	1	-0.0258577382272356
ADORA3	HTR2A	1	-0.0281839031373056
ADORA3	SLC1A3	1	-0.0544578840589733
ADORA3	SLCO2B1	1	-0.11844144388294801
ADORA3	ZBTB16	1	-0.0306007184681835
ADPRH	POPDC2	1	-0.13104458767121802
ADPRM	CALM3	1	0.0562490425977551
ADPRM	DDIT3	1	-0.0196938053140651
ADPRM	PLEKHO1	1	-0.0753924303411811
ADPRM	ZNF821	1	-0.0009506654614567891
ADRA1B	ADRA2C	1	-0.01076431165814
ADRA1B	AGFG2	1	-0.0514221466826799
ADRA1B	ATP10A	1	-0.0170692755733261
ADRA1B	CCND3	1	-0.0420520005245833
ADRA1B	CEBPB	1	-0.0461575865544307
ADRA1B	DOK7	1	-0.0380751221092175
ADRA1B	EFHD1	1	-0.0589227927776093
ADRA1B	FOXO1	1	-0.0145203985498043
ADRA1B	IRS2	1	-0.00789869927487479
ADRA1B	KLF15	1	-0.186585413002089
ADRA1B	LRRC16A	1	-0.0175915161008282
ADRA1B	MXI1	1	-0.00488488012471563
ADRA1B	PXDC1	1	-0.0719836703227394
ADRA1B	SLC19A2	1	-0.0514868123280427
ADRA1B	SLCO4A1	1	-0.0040691676850226
ADRA1B	TBC1D8	1	-0.05586244907428
ADRA1B	TCEAL1	1	-0.0387882619515295
ADRA1B	ZBTB16	1	-0.0038624524184310205
ADRA1D	COL9A2	1	-0.0563212350158072
ADRA1D	FZD1	1	-0.00665660537594366
ADRA1D	GALNTL6	1	-0.0172909583704943
ADRA1D	GPD1L	1	-0.0503304426013924
ADRA1D	KCNAB1	1	-0.0482586381336074
ADRA1D	MAB21L1	1	0.0229941384065216
ADRA1D	RGS7BP	1	-0.0518682831718784
ADRA1D	SOST	1	-0.0180574537975149
ADRA2A	FAM162B	1	-0.00216428268309364
ADRA2A	MDFI	1	-0.0631730163013019
ADRA2A	NEURL1B	1	-0.0173135717476704
ADRA2A	NR2F2	1	-0.0074081801567855
ADRA2A	RBP5	1	-0.00480241790017155
ADRA2A	SNED1	1	-0.0396349542253379
ADRA2A	TLL1	1	-0.0177765944314001
ADRA2A	UNC13A	1	-0.0487929485611129
ADRA2B	APLN	1	-0.0262488189575457
ADRA2B	ZNF395	1	-0.0192607536198685
ADRA2C	CKB	1	-0.00216075734653519
ADRA2C	CNOT8	1	-0.0316305474118293
ADRA2C	DOK7	1	-0.10197484720936399
ADRA2C	FBXO2	1	-0.00923205241864148
ADRA2C	HSPB7	1	-0.0341329071172358
ADRA2C	LMO3	1	-0.0735588187229458
ADRA2C	PLXNB1	1	-0.118134713530901
ADRA2C	PXMP2	1	-0.00221222098725245
ADRBK1	ANKRD13D	1	-0.0594059169616264
ADRBK1	NEK7	1	-0.00253151585194962
ADRBK1	NME3	1	-0.0290417582174612
ADRBK1	STK11	1	-0.11802340357563099
ADRBK1	VAMP4	1	-0.00287423564369372
ADRBK1	ZNF219	1	-0.00897902913163445
AEBP1	BGN	1	-0.145407847296471
AEBP1	LTBP3	1	-0.00716839979672075
AEN	C12orf5	1	-0.0219241124262747
AEN	CDKN1A	1	-0.00982242528926242
AEN	EDA2R	1	-0.0336584138710972
AEN	FDXR	1	-0.116800566486824
AEN	IER5	1	-0.0665095762314755
AEN	NDUFAF6	1	-0.00453786350612468
AEN	PHLDA3	1	-0.00227634150063198
AEN	SPATA18	1	-0.0980873910971854
AEN	TRIB1	1	-0.0251937952198782
AEN	TSC22D2	1	-0.0669593728686952
AFAP1L1	BCL6B	1	-0.0853324117270627
AFAP1L1	CARD10	1	-0.0436309930116276
AFAP1L1	CCM2L	1	-0.0108732340874368
AFAP1L1	CLEC14A	1	-0.0092226305950845
AFAP1L1	DLL4	1	-0.0263495694304885
AFAP1L1	FXYD6	1	-0.0191732773356985
AFAP1L1	GPIHBP1	1	-0.0304596152894497
AFAP1L1	HSPA12B	1	-0.0387693224811068
AFAP1L1	ITGA6	1	-0.005369905394186521
AFAP1L1	KANK3	1	-0.0668884363385074
AFAP1L1	PRKCH	1	-0.0110368794799915
AFAP1L1	ROBO4	1	-0.00907034160826899
AFAP1L1	SDPR	1	-0.0030132502433537
AFAP1L1	SHANK3	1	-0.0228732864556082
AFAP1L2	AXIN2	1	0.0247975626105364
AFAP1L2	COLQ	1	-0.013636608027731001
AFAP1L2	ESAM	1	-0.0434128367694956
AFAP1L2	FMNL3	1	-0.0220639543777226
AFAP1L2	GJA5	1	-0.0138638467482212
AFAP1L2	HOXB3	1	-0.00220313060947968
AFAP1L2	HOXD3	1	-0.0719848327381999
AFAP1L2	HRC	1	-4.7149440507432395e-07
AFAP1L2	NRGN	1	-0.11357603716407999
AFAP1L2	PLXNA4	1	0.0252503382787436
AFAP1L2	PRKCB	1	0.000501885912287059
AFAP1L2	PRTFDC1	1	0.0151223219090084
AFAP1L2	SEMA3C	1	0.0456786775842119
AFAP1L2	SOX13	1	-0.007337679049069391
AFAP1L2	SOX5	1	-0.0290232389488584
AFAP1L2	WISP2	1	0.0040479339557789205
AFF2	CNTFR	1	-0.035668631008859
AFF2	IGSF10	1	-0.0880060454258613
AFF2	LAMA2	1	-0.045478747481928004
AFF2	MAMDC2	1	-0.0213358574599748
AFF2	MAOA	1	-0.0658098577090521
AFF4	NEDD9	1	-0.00257879184130775
AFF4	RAB32	1	-0.057953439598776996
AFF4	ZBTB21	1	-0.0114400576016272
AFP	PRUNE2	1	-0.009228323652188309
AFP	SH3GL3	1	-3.74307905345039e-05
AGAP3	C12orf44	1	-0.046031811702861
AGAP3	C9orf72	1	-0.0193556972514652
AGAP3	CDKN1C	1	-0.0361636350137646
AGAP3	DVL1	1	-0.0642108116863199
AGAP3	ELL3	1	-0.00280757041282933
AGAP3	JHDM1D	1	-0.0149575786605343
AGAP3	JMY	1	-0.0423773559706363
AGAP3	PRRT1	1	-0.013049878177214
AGAP3	SPSB3	1	-0.0770623174874217
AGAP3	TST	1	-0.0507953370067399
AGAP3	UBR4	1	-0.0192179943644223
AGER	ARMC6	1	0.0180074106372494
AGER	AVIL	1	-0.0939434567958186
AGER	ELMO3	1	-0.00164670952595524
AGER	GDPD3	1	-0.129838415922569
AGER	KRTCAP3	1	-0.0120308968412983
AGFG1	CD163	1	-0.10174027368496401
AGFG1	CEBPB	1	-0.0026520924135855
AGFG1	LYVE1	1	-0.0217693354454286
AGFG2	CNOT8	1	-0.0441779273690907
AGFG2	CRISPLD1	1	0.0152030690067573
AGFG2	EZR	1	-0.0920146068472577
AGFG2	FOXO1	1	-0.11595513252657101
AGFG2	LRRC16A	1	-0.0851149970270957
AGFG2	LRRC8A	1	-0.00393788917429695
AGFG2	MXD4	1	-0.0449371310696843
AGFG2	PLXNB1	1	-0.008349809389507641
AGFG2	PPP1CB	1	-0.0062951894562200605
AGFG2	SLC15A3	1	0.0257448191729665
AGFG2	SLC26A6	1	-0.0194481872904961
AGFG2	SLCO4A1	1	-0.0108163371777314
AGFG2	SNCAIP	1	0.0051748724650198296
AGFG2	ZBTB7B	1	-0.0422485631710855
AGL	IL1RL1	1	-0.0390615024123597
AGL	PLA2G4A	1	-0.0410402034245631
AGL	ZEB2	1	-0.006728458061644371
AGO2	ATP1A1	1	-0.0021167793501898
AGO2	HIPK2	1	-0.0392842924700803
AGO2	MKLN1	1	-0.0142154488064427
AGPAT2	C19orf80	1	-0.0227722706608718
AGPAT2	CIDEA	1	-0.0025316129796562397
AGPAT2	DGAT2	1	-0.0480899942549603
AGPAT2	DUSP4	1	-0.007955744380329229
AGPAT2	GPAM	1	-0.0550269748262474
AGPAT2	GPD1	1	-0.0104414019368355
AGPAT2	LGALS12	1	-0.101567070372974
AGPAT2	LPL	1	-0.0173603757227449
AGPAT2	MRAP	1	-0.0445837034741011
AGPAT2	PCK1	1	-0.0546041809903003
AGPAT2	PLIN1	1	-0.0382006358966084
AGPAT2	PNPLA2	1	-0.0436907303622364
AGPAT2	PPP1R1A	1	-0.00417104017553991
AGPAT2	SGK2	1	-0.092931348786988
AGPAT2	SLC7A10	1	-0.0555681786441964
AGPAT2	THRSP	1	-0.0580589833321324
AGPAT2	TM7SF2	1	-0.0439966833018929
AGPAT4	CREM	1	-0.0143944929915313
AGPAT9	SRA1	1	-0.00239274675999572
AGRN	IRF7	1	-0.0479585072231348
AGT	CXCL12	1	-0.0175924277597391
AGTRAP	CELF2	1	-0.0102735169634311
AGTRAP	LYAR	1	0.00209909497696372
AGTRAP	PCYOX1L	1	-0.002934123692437
AGTRAP	PHF1	1	0.0279014447654277
AHDC1	ARID4A	1	-0.014156405910727
AHDC1	BCORL1	1	-0.0664707873240522
AHDC1	C17orf59	1	-0.00428748477017195
AHDC1	CMKLR1	1	-0.0293946816260443
AHDC1	CREB5	1	0.0148046579163977
AHDC1	GADD45G	1	-0.0015437807685513198
AHDC1	GATSL3	1	-0.0442680916116776
AHDC1	GPRC5C	1	-0.0732606959287887
AHDC1	HDAC7	1	-0.00870856929415419
AHDC1	ORC5	1	-0.01627156910154
AHDC1	PLK2	1	0.0394550215339476
AHDC1	PTK2	1	0.0111811266229476
AHDC1	PYGO2	1	-0.0536244883655306
AHDC1	RARA	1	-0.00616028200144076
AHDC1	RARG	1	-0.100428336564126
AHDC1	SLC12A6	1	0.0035352606265663796
AHDC1	TSC22D4	1	-0.0404473323070285
AHDC1	ZFP36L1	1	-0.0136761749508852
AHDC1	ZNF703	1	-0.0426599366785542
AHRR	UNC13A	1	-0.0230903474180667
AHSA1	CAP2	1	-0.0211252942159613
AHSA1	FXR1	1	-0.0729654422935343
AHSA1	HSPB8	1	-0.0194346019374072
AHSA1	HSPH1	1	-0.130409452245912
AHSA1	SLC35B2	1	0.0509719094820943
AHSP	ALAS2	1	-0.24311287186207
AIF1	ARHGAP4	1	-0.0188607126257544
AIF1	BTK	1	-0.0108721290376062
AIF1	C1QA	1	-0.0366655021951544
AIF1	C1QB	1	-0.0613552456493314
AIF1	C1QC	1	-0.0855465276231714
AIF1	C1orf162	1	-0.11520581958452002
AIF1	CACNA2D4	1	-0.0677771868974752
AIF1	CARD9	1	-0.00133795066064944
AIF1	CD14	1	-0.0175899759166994
AIF1	CSF1R	1	-0.0129904658792489
AIF1	CYBB	1	-0.126694734001188
AIF1	DOCK2	1	-0.0991586785718498
AIF1	DOK2	1	-0.0147496770555817
AIF1	EBI3	1	-0.0759551565550901
AIF1	F13A1	1	-0.06756043103639
AIF1	FOLR2	1	-0.0305174508695678
AIF1	GNA15	1	-0.0239135320870929
AIF1	HCK	1	-0.103056040779423
AIF1	HCST	1	-0.0831322959880511
AIF1	IGSF21	1	-0.0759669880523083
AIF1	ITGB2	1	-0.165220389575729
AIF1	LCP1	1	-0.0044480066342637604
AIF1	LST1	1	-0.0729903974738141
AIF1	LY86	1	-0.125981682622446
AIF1	NCKAP1L	1	-0.0016881442374278599
AIF1	PTPN6	1	-0.00450959592883365
AIF1	RNASE6	1	-0.00925565120930354
AIF1	SPI1	1	-0.0210327948596879
AIF1	TYROBP	1	-0.00513058799843827
AIF1	UCP2	1	-0.0252335568098831
AIF1	VAMP8	1	-0.260461886605348
AIF1	WAS	1	-0.06398461216267401
AJUBA	AMOTL2	1	-0.19055179594851798
AJUBA	C8orf58	1	-0.005534512676042221
AJUBA	DST	1	0.060580298139741
AJUBA	PDLIM2	1	-0.0252618872792919
AJUBA	TRAM2	1	-0.0158513035006152
AJUBA	UBAP1L	1	-0.0221136690306045
AK9	LIMS2	1	-0.00223633086429617
AKAP1	CDKL5	1	-0.0223162696862915
AKAP1	HSPB7	1	-0.0342969105291981
AKAP1	KALRN	1	-0.0068449851068218106
AKAP1	MRVI1	1	-0.0572181252476781
AKAP1	PCDH20	1	-0.007921658327473229
AKAP1	RIPK1	1	0.0666316514379732
AKAP1	SCFD2	1	-0.0179823140217502
AKAP1	XPR1	1	-0.0766247035810593
AKAP1	ZBTB16	1	-0.0030589906448247
AKAP12	RIPK4	1	-0.008481584305433191
AKAP12	SPRY2	1	-0.00575283130605353
AKAP13	EPHA4	1	-0.00788951559496021
AKAP13	FOSL2	1	-0.056465992408673
AKAP2	EBF1	1	-0.00610370182041035
AKAP2	PUSL1	1	0.00181454271895112
AKAP2	PVR	1	-0.0603748196141786
AKAP2	ZC3H4	1	-0.020080123813573002
AKAP6	ARHGAP24	1	-0.0363369751664112
AKAP6	ARHGEF2	1	-0.0161147517654875
AKAP6	BACH2	1	-0.0536888606923308
AKAP6	CD44	1	-0.00561277376360385
AKAP6	DAPK3	1	-0.015812935698383
AKAP6	IFT43	1	-0.0102705483510914
AKAP6	IQCJ-SCHIP1	1	-0.0615652814815548
AKAP6	ITGB1BP2	1	-0.0722415520508703
AKAP6	LMCD1	1	-0.0750123117539697
AKAP6	NFIX	1	0.00911908499699582
AKAP6	NOTCH1	1	0.0356004992950942
AKAP6	RPS6KA2	1	0.016086734963489998
AKAP6	SAMD4A	1	-0.0707761237038059
AKAP8	APLN	1	-0.0183606584784328
AKAP8	AR	1	0.0420684191688276
AKAP8	BCKDHA	1	-0.016318172766266
AKAP8	BRF2	1	-0.0352032513247459
AKAP8	CHD1L	1	-0.0598699628115914
AKAP8	ENO2	1	-0.0154233340733432
AKAP8	FUT11	1	-0.0372141939912881
AKAP8	MEDAG	1	0.0336821587033597
AKAP8	NCOA5	1	-0.0845312422220705
AKAP8	PGF	1	-0.0844950292658423
AKAP8	RBM14	1	0.00959269459179148
AKAP8	TFRC	1	0.000185126026937481
AKAP8	ZNF189	1	-0.036604753984097
AKAP8	ZNF395	1	-0.0957532018741079
AKAP8L	ARHGEF7	1	-0.0589390722111114
AKAP8L	TCIRG1	1	-0.0332019595715623
AKAP8L	ZDHHC5	1	0.008447616674702191
ALAD	ALDH3A2	1	-0.0344584279491645
ALAD	ANKRD35	1	-0.0353066201349411
ALAD	EPB41L2	1	-0.0240220938410742
ALAD	PPP1R3G	1	0.00689344988504341
ALAD	SEMA3F	1	-0.0596367115775801
ALB	APOA1	1	-0.152645422920673
ALB	APOA2	1	-0.28666830927426395
ALB	APOC3	1	-0.28733908202212605
ALB	FGB	1	-0.14536496401984303
ALB	FGG	1	-0.11002106793668902
ALDH18A1	DPYSL3	1	-0.00394929216276994
ALDH18A1	MAGED1	1	-0.052186797710915
ALDH18A1	SEC24A	1	-0.00251792896946439
ALDH1A1	AMOT	1	-0.0658461058017137
ALDH1A1	ARPP21	1	0.0173097125952699
ALDH1A1	C2orf88	1	-0.0255617458614384
ALDH1A1	CDK15	1	-0.0211770270107337
ALDH1A1	FOXD1	1	-0.0505388456171922
ALDH1A1	GALNTL6	1	-0.00174691524766385
ALDH1A1	HAPLN1	1	0.0798728438329195
ALDH1A1	HOXA5	1	-0.0620174560154216
ALDH1A1	HOXA7	1	-0.0436402070844401
ALDH1A1	HOXB2	1	-0.0392671763146471
ALDH1A1	HOXB3	1	-0.0729194476438124
ALDH1A1	HOXB4	1	-0.0634929450112569
ALDH1A1	HOXB7	1	-0.0243269291466879
ALDH1A1	HOXD3	1	-0.0711181078258996
ALDH1A1	HOXD8	1	-0.0923475172755511
ALDH1A1	HRC	1	-0.00124254097503459
ALDH1A1	IGFBP6	1	-0.0145543118923336
ALDH1A1	IL17RE	1	-0.00153604501257137
ALDH1A1	ITGA5	1	-0.08239410083679902
ALDH1A1	KCNAB1	1	-0.00107667406459706
ALDH1A1	LPHN3	1	-0.00337358236547207
ALDH1A1	LRRC32	1	-0.0301777562373006
ALDH1A1	LRRC4C	1	0.0037653939938794797
ALDH1A1	MAB21L1	1	0.0349867683934574
ALDH1A1	MAB21L2	1	0.13369684960056
ALDH1A1	MAGI1	1	-0.0573073723613795
ALDH1A1	MGP	1	-0.0860039032365689
ALDH1A1	NFASC	1	-0.0372514428656622
ALDH1A1	NPY1R	1	-0.131181900226184
ALDH1A1	NPY5R	1	-0.0882009218519596
ALDH1A1	PARM1	1	-0.101648801180048
ALDH1A1	PEAR1	1	-0.0182671626817025
ALDH1A1	PLA2G4A	1	-0.00809354665807446
ALDH1A1	PROCR	1	-0.0358994476606594
ALDH1A1	PRR16	1	-0.00628982302407665
ALDH1A1	RAP1GAP2	1	0.0396014357028735
ALDH1A1	RARB	1	-0.0316456231904129
ALDH1A1	RBM20	1	0.0122689449680458
ALDH1A1	RGS7BP	1	-0.0664019304887648
ALDH1A1	RNF180	1	-0.10086717805920901
ALDH1A1	RPS6KA6	1	-0.015736606445889
ALDH1A1	SKAP2	1	-0.135476308155058
ALDH1A1	SLC22A23	1	-0.0294907893596409
ALDH1A1	STK32B	1	0.0115391719950699
ALDH1A1	TBX1	1	-0.032982702402789
ALDH1A1	TMOD1	1	-0.0436714514902705
ALDH1L1	ALDH2	1	-0.009511440877092691
ALDH1L1	ALDH4A1	1	-0.0759510434571052
ALDH1L1	B3GNT2	1	0.0133885758379599
ALDH1L1	CALM1	1	0.0020350999465323896
ALDH1L1	DCXR	1	-0.0472313244834886
ALDH1L1	FBLN5	1	-0.0616053170972769
ALDH1L1	FNIP2	1	0.0377972568355442
ALDH1L1	FRMD3	1	-0.0166356775245308
ALDH1L1	GFPT2	1	-0.00777593673131367
ALDH1L1	GYG2	1	-0.111004935013362
ALDH1L1	HAS2	1	-0.0205262277419837
ALDH1L1	HLA-DPB1	1	0.000648919353734859
ALDH1L1	LAMA2	1	-0.026754906461665003
ALDH1L1	LRBA	1	-0.0232459024852335
ALDH1L1	MAOA	1	-0.127823934387505
ALDH1L1	MGST1	1	-0.008865139598293879
ALDH1L1	OLFML3	1	-0.0295154409853385
ALDH1L1	OMD	1	-0.0610343044945231
ALDH1L1	PCYT2	1	-0.0413571608655312
ALDH1L1	RBP4	1	-0.0305083150081666
ALDH1L1	RPS6KA2	1	-0.13131983469518801
ALDH1L1	SHISA4	1	-0.0517879855662964
ALDH1L1	SPINT2	1	-0.0346987410433737
ALDH1L1	SRPX2	1	-0.0083613743754234
ALDH1L1	ST3GAL5	1	-0.00429641348410664
ALDH1L1	SUN2	1	-0.0511669763358334
ALDH1L1	SYNE2	1	-0.0231686775141351
ALDH1L1	TGFBR2	1	-0.0701408096733563
ALDH1L1	THRA	1	-0.10995584111001501
ALDH1L1	TNS1	1	-0.0111421054143237
ALDH1L1	TWIST2	1	-0.0792541869117895
ALDH1L1	WT1	1	-0.0221615567261524
ALDH1L2	C11orf84	1	0.00632804363905451
ALDH1L2	E2F4	1	0.0786861403227559
ALDH1L2	GPX4	1	0.0362494518353525
ALDH1L2	PHGDH	1	-0.0091114802709035
ALDH1L2	PYCR1	1	-0.0968754732621662
ALDH1L2	SHMT2	1	-0.0392052169542219
ALDH1L2	URB2	1	0.0293643277913754
ALDH2	IZUMO4	1	-0.088515507923612
ALDH2	OMD	1	-0.00960522830090821
ALDH2	PLD5	1	-0.0028517600186435802
ALDH2	PXMP2	1	-0.0766157130091983
ALDH2	SELENBP1	1	-0.0157864472008915
ALDH2	SUN2	1	-0.0157877480344253
ALDH3A2	ANO6	1	0.0193107418708843
ALDH3A2	C6orf106	1	-0.0379270679966586
ALDH3A2	CBR1	1	-0.0344912466553339
ALDH3A2	CCBL1	1	-0.0224911683047549
ALDH3A2	EPHX1	1	-0.0587390143548599
ALDH3A2	G6PD	1	-0.0217243464895339
ALDH3A2	IL18R1	1	-0.00632320605573278
ALDH3A2	ME1	1	-0.0178985452110227
ALDH3A2	MYO1E	1	0.0553909377716661
ALDH3A2	NFIA	1	-0.0996225953309702
ALDH3A2	NGFRAP1	1	-0.0157134898930754
ALDH3A2	NR4A3	1	-0.0038667453966212796
ALDH3A2	NTF3	1	0.0217240102063252
ALDH3A2	PITPNM1	1	-0.0016657333578918901
ALDH3A2	SEMA3F	1	-0.0585860494893803
ALDH3A2	SERTAD4	1	-0.00946740667650485
ALDH3A2	SLC2A1	1	0.0564618490026087
ALDH3A2	SNPH	1	-0.0602314947468537
ALDH3A2	SRXN1	1	-0.0721567611683442
ALDH3A2	ST3GAL5	1	-0.007810288565475559
ALDH3A2	SYNJ1	1	-0.0117896969692511
ALDH3A2	TKT	1	-0.0700988795285337
ALDH4A1	BCAT2	1	-0.00885436238388774
ALDH4A1	MAOA	1	-0.0658458678655528
ALDH4A1	PCYT2	1	-0.148540929594584
ALDH4A1	RRAS	1	-0.00173218908763974
ALDOA	APLN	1	-0.167907661727146
ALDOA	BCKDHA	1	-0.0155234107200359
ALDOA	CA9	1	-0.191903450469523
ALDOA	CHD1L	1	-0.0749664178345895
ALDOA	CKMT2	1	-0.20526806479224105
ALDOA	EGLN3	1	-0.0677267073192796
ALDOA	ENO1	1	-0.100989556663733
ALDOA	FOXL1	1	-0.0313198994161152
ALDOA	GYS1	1	-2.38659715417477e-05
ALDOA	LOX	1	-0.0647304653096427
ALDOA	NDUFA4L2	1	-0.0970974935395762
ALDOA	PLOD1	1	-0.0510928957332181
ALDOA	SLC2A1	1	-0.0802885579088509
ALDOA	THBS2	1	-0.00621998354280451
ALDOA	VEGFA	1	-0.128105967365268
ALDOA	WSCD1	1	-0.0203054691573703
ALG2	DNAJB9	1	-0.0494839863762064
ALG2	GCC1	1	-0.0990099981882023
ALG2	MAD2L1BP	1	-0.00210176040400824
ALG2	NDNL2	1	-0.0445918180475921
ALG2	RPUSD2	1	-0.0285008943487622
ALG2	TRMT10C	1	-0.0801739490517394
ALG2	XBP1	1	-0.11021232618283199
ALG2	ZBTB6	1	-0.00878258827408888
ALG2	ZNF24	1	-0.0235702431651884
ALG2	ZNF416	1	-0.0303204406939544
ALG2	ZNF574	1	-0.0033999846488907397
ALOX15B	CHIT1	1	-0.0586150050088268
ALOX15B	FGR	1	-0.0441643527851824
ALOX15B	KCNE1	1	-0.0184898983787592
ALOX15B	PIK3R5	1	-0.00312751691029872
ALOX15B	PKD2L1	1	-0.0227676950663742
ALOX15B	SNX10	1	-0.0147711871693522
ALOX15B	ST14	1	-0.0531498671797107
ALOX5	ARHGAP4	1	-0.054575559919079995
ALOX5	CD53	1	-0.029857385883613998
ALOX5	CNTN4	1	-0.0167097662262289
ALOX5	FMNL1	1	-0.0818092005014527
ALOX5	GPSM3	1	-0.0769390085602404
ALOX5	MYO1F	1	-0.0182002404547702
ALOX5	NCF4	1	-0.00637142475877832
ALOX5	PARVG	1	-0.0805657978104666
ALOX5	PIK3R5	1	-0.0698131083006041
ALOX5	PTPN6	1	-0.00346588921381801
ALOX5	RNF149	1	-0.00042958834663346
ALOX5	SELPLG	1	-0.0395572285389518
ALOX5	SLA	1	-0.0349853528868692
ALOX5	SMAP2	1	-0.0677906247706535
ALOX5	SPI1	1	-0.0715914335739623
ALOX5	STXBP2	1	-0.0420597470348198
ALOX5	TBXAS1	1	-0.113483847966992
ALOX5	THEMIS2	1	-0.0680774935498166
ALOX5	TYMP	1	-0.0575861217828548
ALOX5AP	C1orf162	1	-0.131333451929769
ALOX5AP	CD163	1	-0.0459940452408434
ALOX5AP	CD53	1	-0.0943020288765356
ALOX5AP	GPSM3	1	-0.0149546182669731
ALOX5AP	ITGAM	1	-0.00213188370106919
ALOX5AP	SPI1	1	-0.00810487794453048
ALOX5AP	SRGN	1	-0.0108806225094411
ALOX5AP	WAS	1	-0.0116163836605243
ALPK3	APLN	1	-0.0670004218689765
ALPK3	C8orf22	1	-0.00081917979991275
ALPK3	CHD1L	1	-0.0650615299047294
ALPK3	CKMT2	1	-0.00144402334704335
ALPK3	NMB	1	-0.0382190959518198
ALPK3	PLOD2	1	-0.0056021425486808395
ALPK3	SLC28A1	1	-0.194201624108133
ALPK3	VEGFA	1	-0.0023691463727992103
ALPL	FCN3	1	-0.0373389298105118
ALPL	GPRIN3	1	0.000904832412809392
ALPL	NFE2	1	-0.0274043042053853
ALPL	S100A8	1	-0.0584003924305352
ALS2CL	TMIE	1	-0.0867279645849458
AMDHD2	ASAP3	1	0.009010641937620691
AMDHD2	FNIP2	1	-0.0368900517044106
AMDHD2	SEPT4	1	0.011436429997411998
AMDHD2	TNKS1BP1	1	0.0249184358385786
AMICA1	AOAH	1	-0.0325875742349246
AMICA1	CD37	1	-0.0346828175586023
AMICA1	CD48	1	-0.0283558144428327
AMICA1	CD74	1	-0.0174777624661122
AMICA1	CERKL	1	-0.0155468020547015
AMICA1	CXCR4	1	-0.0611515768617262
AMICA1	FCER1A	1	-0.0347781920288465
AMICA1	FGD3	1	-0.0101733785081016
AMICA1	GAPT	1	-0.00800792314092242
AMICA1	HLA-DMB	1	-0.0900514407766117
AMICA1	HLA-DPB1	1	-0.0153911977520993
AMICA1	MYO1F	1	-0.022783052192263
AMICA1	PARVG	1	-0.0407972564209629
AMICA1	PIK3R6	1	-0.00465101527761268
AMICA1	PLCB2	1	-0.0401777283802047
AMICA1	RNASE6	1	-0.00682885382957572
AMICA1	TRAF3IP3	1	-0.0443953740376186
AMICA1	WAS	1	-0.0317063654340158
AMIGO1	MEF2C	1	0.0127918679588014
AMOT	IL17RE	1	-0.0698959629864203
AMOT	LRRC32	1	-0.0321097315409546
AMOT	PARM1	1	-0.0490549901999671
AMOT	SCRN1	1	-0.0158346681924234
AMOT	SLC30A3	1	-0.0601637077975112
AMOT	TRAK2	1	-0.0390771093875103
AMOTL1	CDKN1C	1	0.0019293355296303698
AMOTL2	ANKS1A	1	0.0135924477929266
AMOTL2	BCAR3	1	-0.000637277420537454
AMOTL2	CRIM1	1	-0.0433254690958592
AMOTL2	EPHA2	1	-0.15288786371829902
AMOTL2	ETS1	1	-0.00199416113665971
AMOTL2	OSR1	1	0.0132321556744348
AMOTL2	TTYH3	1	0.00973569248706717
AMOTL2	ZNF574	1	-0.0284979748728556
AMPD2	FAM53C	1	-0.0275720085312287
AMPD2	TP53INP2	1	-0.0649778803261133
AMPD3	IL4I1	1	-0.0150273818124886
AMPH	DYSF	1	-0.0288887800607158
AMPH	LRRN1	1	-0.0264856595856892
ANAPC2	CTU2	1	-0.0142542769950745
ANAPC2	DUS1L	1	-0.0143608172736585
ANGEL1	C18orf21	1	0.0031655193206141102
ANGEL1	FAM229A	1	0.0150440670561079
ANGEL1	MRPL24	1	-0.00670607900963626
ANGEL1	RPUSD1	1	0.013637544913815
ANGEL1	RUVBL1	1	-0.0209833378412554
ANGEL1	SCFD2	1	-0.0242379999486261
ANGPT1	BMPR1B	1	-0.0194342383841363
ANGPT1	CDKN2C	1	-0.0400886908229928
ANGPT1	CKMT2	1	0.0126111563697396
ANGPT1	CYP4X1	1	-0.0994185941217819
ANGPT1	FAM131B	1	0.0109767031570377
ANGPT1	KBTBD13	1	0.009437269430611291
ANGPT1	MARVELD1	1	0.00378686157810721
ANGPT1	MEIS1	1	-0.0070591679915481
ANGPT1	NTHL1	1	-0.0128088897734767
ANGPT1	PLCL1	1	-0.0505781941472683
ANGPT1	PPAP2B	1	-0.0214921743702688
ANGPT1	PRICKLE2	1	-0.0194630224241885
ANGPT1	PTP4A3	1	0.00661089075441162
ANGPT1	RANBP3L	1	-0.0193936917747198
ANGPT1	ZNF503	1	-0.000349229969048237
ANGPTL1	BMP1	1	-0.0327044520921933
ANGPTL1	EBF1	1	-0.0569594505273935
ANGPTL1	GPC1	1	-0.0253120939740664
ANGPTL1	HIF1A	1	-0.0025524389973455
ANGPTL1	IRAK3	1	-0.00324478138517257
ANGPTL1	LCMT2	1	0.000407476566985011
ANGPTL1	LDB1	1	0.0270244397102505
ANGPTL1	NFIA	1	-0.065445126521525
ANGPTL1	NFIC	1	-0.0655276844075506
ANGPTL1	OSBPL5	1	-0.0698876130968878
ANGPTL1	PARM1	1	-0.110582988087247
ANGPTL1	PDE4D	1	-0.0473340107878187
ANGPTL1	PHF1	1	0.00915087841078408
ANGPTL1	ZNF423	1	-0.0184883228048061
ANGPTL1	ZNF574	1	0.0193812705993692
ANGPTL1	ZNF830	1	0.020039619600099
ANGPTL2	PCYT2	1	0.0117042894452662
ANGPTL2	RAPGEF3	1	0.0331661615343748
ANGPTL5	DCN	1	-0.0247599053334936
ANGPTL5	FAM180B	1	-0.0621533551165876
ANGPTL5	SCARA5	1	-0.0491422261685715
ANGPTL7	ARHGEF28	1	-0.00421749432958611
ANGPTL7	AXIN2	1	-0.0386654317179962
ANGPTL7	C3orf55	1	-0.00488170566308538
ANGPTL7	CARTPT	1	-0.19501765668439103
ANGPTL7	CDH2	1	-0.0129259059221932
ANGPTL7	CDKN1C	1	-0.0148988196174723
ANGPTL7	CES4A	1	-0.0151602799638223
ANGPTL7	CNOT8	1	-0.0802444877595387
ANGPTL7	CYTL1	1	-0.0486990838170483
ANGPTL7	DES	1	-0.0648286371011082
ANGPTL7	DOCK10	1	0.11122373823542
ANGPTL7	FRAS1	1	-0.0411126974241613
ANGPTL7	IGSF10	1	-0.11538198393727801
ANGPTL7	IL17D	1	-0.10072566962028301
ANGPTL7	LAMA2	1	-0.0924001819795678
ANGPTL7	LGR5	1	-0.0567254205867097
ANGPTL7	MAB21L1	1	-0.0602831795971502
ANGPTL7	NGFRAP1	1	-0.0309471914897282
ANGPTL7	NOTCH3	1	0.0429340145247784
ANGPTL7	NRGN	1	0.0034815427732194197
ANGPTL7	OLFML3	1	-0.048307981513741
ANGPTL7	OMD	1	-0.0107533520771736
ANGPTL7	RAP1GAP2	1	-0.0016616445989210001
ANGPTL7	SEMA3C	1	-0.0321452380646627
ANGPTL7	SLC20A2	1	0.012255537597576999
ANGPTL7	SRPX2	1	-0.0201732031887084
ANGPTL7	STC2	1	-0.011161192278403998
ANGPTL7	TSPAN8	1	-0.0164661936137693
ANGPTL7	WISP2	1	-0.0859715910205724
ANK2	OLFML1	1	-0.0319202939809966
ANKH	GNAI1	1	0.0235564007505182
ANKHD1	SRCAP	1	-0.0100112775991179
ANKMY2	ULK1	1	0.0294893271822049
ANKRD1	CCDC81	1	-0.0472649774825877
ANKRD1	LMO7	1	-0.0248868462103831
ANKRD1	NFASC	1	-0.0745371547433396
ANKRD1	NTF3	1	-0.0025223577249158897
ANKRD1	PVR	1	-0.0618072981692541
ANKRD1	SEL1L2	1	-0.0228942545256566
ANKRD10	ZRANB2	1	-0.0207041869595795
ANKRD13A	CAPN5	1	-0.0661655127184894
ANKRD13A	DAB2IP	1	-0.00931572533969539
ANKRD13A	DUSP15	1	-0.0139647356739652
ANKRD13A	FZD2	1	-0.0356741320580647
ANKRD13A	GLIPR2	1	-0.0088769215023797
ANKRD13A	PRKAB2	1	-0.0605292601563113
ANKRD13A	RASL12	1	-0.0167805291605191
ANKRD13D	CCNA2	1	-0.0133183907090894
ANKRD29	EPHA3	1	-0.0066782132554694795
ANKRD29	LAMA3	1	-0.19992726521589899
ANKRD29	NTRK2	1	-0.000204879974967473
ANKRD34A	C17orf59	1	-0.0359905760763881
ANKRD34A	CDC42EP3	1	0.0108161080242996
ANKRD34A	DHX37	1	0.0217517422163038
ANKRD34A	FHOD1	1	-0.0183128239247458
ANKRD34A	GAS2L1	1	-0.00913729231144289
ANKRD34A	GATSL3	1	-0.00693708118193458
ANKRD34A	PLCB3	1	-0.0780789622466384
ANKRD34A	PPP1R9B	1	-0.0629088820923319
ANKRD34A	PRRT1	1	-0.0489283833654616
ANKRD34A	PYGO2	1	-0.0190993460633662
ANKRD34A	RARA	1	-0.0528861231472105
ANKRD34A	SOX12	1	-0.030876957325821
ANKRD35	CDS2	1	0.0953978300431447
ANKRD35	FUT8	1	-0.0478354101389964
ANKRD35	HDAC9	1	0.008770780155558041
ANKRD35	IRAK3	1	-0.0294881144886547
ANKRD35	MCC	1	-0.00348196461053613
ANKRD35	MEIS1	1	-0.0304205777515145
ANKRD35	NFIC	1	-0.0174003677812544
ANKRD35	PLS3	1	0.0031488528115987
ANKRD35	PTPRO	1	0.0023364459719769897
ANKRD35	RCAN2	1	0.007376003751583809
ANKRD35	RHOBTB3	1	-0.00980368978076419
ANKRD35	SLC44A1	1	-0.00507392914164365
ANKRD35	SOBP	1	-0.0509066836148446
ANKRD35	TEX2	1	-0.0117445694782827
ANKRD35	TMEM47	1	0.0245987146302642
ANKRD35	ZNF423	1	-0.0329646645818625
ANKRD37	BHLHE40	1	-0.0532725931594745
ANKRD37	BHLHE41	1	-0.081529928366117
ANKRD37	EDN2	1	-0.0114559272167022
ANKRD37	EGLN3	1	-0.0344711528419563
ANKRD37	ERRFI1	1	-0.00478716849590103
ANKRD37	HES1	1	-0.0765996133106268
ANKRD37	IMP3	1	-0.154887323479401
ANKRD37	KDM3A	1	-0.0335048026089948
ANKRD37	PPP1R3C	1	-0.0324549975035341
ANKRD37	RIPK4	1	-0.0146404167091668
ANKRD37	RLF	1	-0.0889782500870801
ANKRD37	SLC2A1	1	-0.0376965873695144
ANKRD37	SMAD7	1	-0.109693416872731
ANKRD37	SNX33	1	-0.0682513844956832
ANKRD37	ZNF395	1	-0.0658062448202064
ANKRD53	CCNH	1	-0.004500358739849129
ANKRD53	CREM	1	-0.0155655196139786
ANKRD53	FN3K	1	-0.0112675438774945
ANKRD53	NR4A3	1	-0.049397191577112004
ANKRD53	SKIL	1	-0.0240503240337443
ANKRD9	BTG3	1	-0.007687105696776671
ANKRD9	C11orf96	1	-0.014947285026569999
ANKRD9	C20orf24	1	-0.0528108435019467
ANKRD9	C9orf72	1	-0.008810676304510741
ANKRD9	CCNH	1	-0.0103723136987188
ANKRD9	CITED4	1	-0.0543424863813193
ANKRD9	CREM	1	-0.0783819612424285
ANKRD9	DIRC2	1	-0.0117390424711577
ANKRD9	GADD45GIP1	1	-0.00602259182063419
ANKRD9	HES4	1	-0.0359358521914601
ANKRD9	MACROD1	1	-0.0366755440754574
ANKRD9	MFSD3	1	-0.00966635106728651
ANKRD9	RBBP6	1	-0.0068505746558829
ANKRD9	SLC22A17	1	-0.0050632401845092
ANKRD9	SPATA2L	1	-0.0197615157202003
ANKRD9	TMEM160	1	-0.151145231681367
ANKRD9	TP53INP2	1	-0.0444354721745837
ANKRD9	TRAPPC5	1	-0.0460961141223142
ANKRD9	ZNF580	1	-0.039742365326681
ANKS1A	CYP2R1	1	-0.0473170965456695
ANKS1A	LDHD	1	0.0238401650368271
ANKS1B	RASGRP2	1	-0.000253649248518607
ANLN	CCNA2	1	-0.00322764902532225
ANLN	CDK1	1	-0.0736152289105259
ANLN	CENPM	1	-0.0387286762829551
ANLN	FOXM1	1	-0.126831812410453
ANLN	NUSAP1	1	-0.0223491824989437
ANLN	PTTG1	1	-0.0921861070735022
ANLN	TOP2A	1	-0.086821802297312
ANO2	ITGB4	1	-0.0456065465209444
ANO2	KIF26A	1	-0.0130471519357364
ANO2	MYRIP	1	-0.0339450736485422
ANO2	PTPRB	1	-0.0231377306193187
ANO8	GATAD2B	1	0.0263805160811147
ANO8	GDF11	1	-0.07216920662389201
ANO8	HIF1A	1	-0.0397134584698778
ANO9	CD3E	1	-0.0597170432239714
ANO9	CD8A	1	-0.0272752821759982
ANO9	ITK	1	-0.11345984522638901
ANO9	LCK	1	-0.129660633062081
ANO9	PBX4	1	-0.0350064294324069
ANO9	RLTPR	1	-0.0482274203198481
ANO9	ZAP70	1	-0.142854875301125
ANTXR1	CTSO	1	-0.0340541187197258
ANTXR2	ENPP5	1	-0.0384462235286041
ANTXR2	FAM131B	1	0.0410727356124069
ANTXR2	PRDM8	1	-0.269723201606737
ANTXR2	PTPRK	1	-0.0755010330505355
ANTXR2	TMTC1	1	-0.12203617302745402
ANTXR2	VANGL2	1	0.0173791105767685
AOAH	CD48	1	-0.155219067108957
AOAH	CD72	1	-0.0315991917835278
AOAH	CD86	1	-0.00093172009781305
AOAH	CPVL	1	-0.0443156484087434
AOAH	EVI2A	1	-0.0279922943676484
AOAH	FYB	1	-0.0104995307292612
AOAH	HLA-DMB	1	-0.0379850644159344
AOAH	HLA-DPB1	1	-0.0112380765577799
AOAH	IL2RB	1	-0.0440952799746254
AOAH	ITGA4	1	-0.0135606730832656
AOAH	KLRB1	1	-0.0817770490521269
AOAH	PTPRC	1	-0.0990746198649841
AOX1	CADM3	1	-0.0018372241389212301
AOX1	CD34	1	-0.0376125941113445
AOX1	CHRDL1	1	-0.0604476530574368
AOX1	CNTFR	1	-0.04643314612453201
AOX1	CSF1	1	-0.007381211750716191
AOX1	CYP4B1	1	-0.18539086251791
AOX1	DCN	1	-0.0481658549973009
AOX1	EBF2	1	-0.00715701690652118
AOX1	ETNK2	1	-0.0209648232961941
AOX1	FAM198A	1	-0.0485652501838775
AOX1	FYN	1	-0.0423607112150138
AOX1	GAS1	1	-0.0291806435748498
AOX1	GPR133	1	-0.13772597866517003
AOX1	GPX3	1	-0.106428647962032
AOX1	IGF1	1	-0.0771764421399362
AOX1	IGFBP6	1	-0.0505776528591002
AOX1	LAMA2	1	-0.00556563043315279
AOX1	MAOA	1	-0.0453532586506297
AOX1	MGST1	1	-0.0812151545278824
AOX1	NID1	1	-0.0589317651655858
AOX1	PODN	1	-0.048948008996992996
AOX1	PROCR	1	-0.009957500857001379
AOX1	PTK2B	1	-0.0799621524355343
AOX1	PTPRS	1	-0.0108525641121869
AOX1	RARRES1	1	-0.0243323129637653
AOX1	SCARA5	1	-0.0154569895849446
AOX1	SERPINF2	1	-0.128367478385679
AOX1	SMARCD2	1	-0.0126777165105824
AOX1	SRPX	1	-0.0526228777091354
AOX1	SRPX2	1	-0.0377337530099765
AOX1	SVEP1	1	-0.0322626775065296
AOX1	TXNIP	1	-0.0423211067182955
AOX1	VIT	1	-0.16962994756589997
AOX1	WNT11	1	-0.0953750298612566
AP000350.4	GSTT1	1	-0.0495191133841352
AP003068.6	GADD45B	1	0.0408338229347432
AP1B1	AP2S1	1	-0.0257362488736519
AP1B1	DOCK2	1	-0.0745196793568187
AP1B1	DOCK4	1	-0.00042371614491537596
AP1B1	FAM20A	1	-0.0114147686845967
AP1B1	FAM78A	1	-0.0241783622639146
AP1B1	FILIP1	1	-0.0381226243088753
AP1B1	FMN1	1	-0.0697568376496587
AP1B1	KCNAB2	1	-0.0764660856804127
AP1B1	LIPA	1	-0.0352489999961932
AP1B1	MFSD1	1	-0.12991403895317
AP1B1	MPP1	1	-0.0571513660141344
AP1B1	MYO5A	1	-0.0971618327098987
AP1B1	NCKAP1L	1	-0.102553386264149
AP1B1	NPC2	1	-0.0204200842914089
AP1B1	NPL	1	-0.0631606215239588
AP1B1	PIK3R5	1	-0.0238255201092645
AP1B1	PPT1	1	-0.008566684802013141
AP1B1	SLC18B1	1	-0.11201795665151
AP1B1	SLC1A3	1	-0.0198706569011433
AP1B1	SLC36A1	1	-0.0018243119881765398
AP1B1	SLCO2B1	1	-0.0127876829668218
AP1B1	ST14	1	-0.0104239730930597
AP1B1	SYNPO2	1	-0.0257928057443044
AP1B1	TFEC	1	-0.00994348022734693
AP1B1	TREM2	1	-0.00270858760708099
AP1B1	TRPM2	1	-0.0399386007594399
AP1B1	UTP3	1	0.0198470529366619
AP1B1	ZYX	1	-0.0325538299381392
AP2S1	HOXD8	1	-0.007715798456246091
AP2S1	MRVI1	1	-0.023210725679703
AP2S1	STK32B	1	0.0380067194265455
AP2S1	TFEC	1	-0.0048176079757651
AP2S1	TRPV2	1	-0.0297723051864524
AP3M1	MEF2D	1	0.000921042544607654
AP3M2	ETV5	1	-0.0966085647895717
AP4B1	DGAT1	1	0.035324146915326
AP4B1	MBD3	1	0.0132789140168263
AP4B1	TFCP2	1	-0.0365570075154676
AP4B1	ZNF691	1	-0.00209909753223726
APBB2	CHD6	1	-0.0077461076779985
APBB2	PPWD1	1	0.0333923463920315
APBB3	ENOSF1	1	-0.0104692406079021
APBB3	ETV3	1	-0.0637774257637079
APBB3	GZF1	1	-0.0968065279575654
APBB3	PLAUR	1	-0.0142916303978432
APBB3	SEMA4A	1	-0.082631371466197
APBB3	TFRC	1	-0.0210939141331876
APCDD1L	IGSF1	1	-0.0442907635891117
APCDD1L	LRRC17	1	-0.00576720811793709
APCDD1L	POU6F2	1	0.0203461310857119
APCDD1L	XRCC4	1	-0.0529237525028526
APEX1	MCM7	1	-0.0544577054619959
APEX1	QTRT1	1	-0.0906031834987568
APEX1	RRAS	1	0.0092278240549018
APEX1	SHISA4	1	0.000962076170383124
APLN	C4orf47	1	-0.0129406255106115
APLN	C5orf46	1	-0.0129792039981613
APLN	C8orf22	1	-0.0314957275853675
APLN	CA9	1	-0.14759620745212398
APLN	CDK18	1	-0.096912696771871
APLN	CHD1L	1	-0.195836765295123
APLN	CKMT2	1	-0.18259465990551396
APLN	EGLN3	1	-0.0352754117046554
APLN	ENO2	1	-0.0615570691406533
APLN	FAM13A	1	-0.0361772704521738
APLN	FAM180A	1	-0.0671578050238279
APLN	FAM20C	1	-0.034074268462336
APLN	FAM219A	1	-0.0582186564707085
APLN	FUT11	1	-0.0181584318179443
APLN	LOX	1	-0.0420195309525378
APLN	MAPKAPK2	1	0.027063477664597997
APLN	MGAT5	1	-0.0415303189588989
APLN	MGLL	1	-0.0146820552539361
APLN	PFKFB4	1	-0.0385288043897357
APLN	PFKP	1	-0.0840968146969084
APLN	PGF	1	-0.0163789856705691
APLN	PLOD1	1	-0.0422247820169097
APLN	PLOD2	1	-0.0622453158586128
APLN	PPFIA4	1	-0.0604642317496676
APLN	PRKAB2	1	-0.00351557552410986
APLN	PTP4A3	1	-0.0216064006945899
APLN	PYGL	1	-0.0145360669532342
APLN	SH3D21	1	-0.0517898463306524
APLN	SLC2A1	1	-0.10587516430242899
APLN	SLC38A5	1	-0.0447785788736225
APLN	THBS2	1	-0.0328851670576456
APLN	TRIM9	1	-0.0114224886268776
APLN	VEGFA	1	-0.200300783541191
APLN	WSCD1	1	-0.0150080974722601
APLN	ZNF292	1	-0.0329529960825611
APLN	ZNF395	1	-0.0197145784679709
APLNR	CDH5	1	-0.0066157130276652395
APLNR	PCDH12	1	-0.0293408174713012
APLNR	TLL1	1	-0.0581580794229167
APOA1	APOA2	1	-0.12630257100605802
APOA1	APOC3	1	-0.26123654749929304
APOA1	FGG	1	-0.0235111118383478
APOA2	APOC3	1	-0.22121837477395198
APOA2	FGB	1	-0.0619540451683977
APOA2	FGG	1	-0.164470706076686
APOB	MAOB	1	-0.0035593479024563705
APOBR	AQP9	1	-0.12185080451778801
APOBR	ARHGAP30	1	-0.0731509110266299
APOBR	CD300LF	1	-0.0928601803558089
APOBR	CHIT1	1	-0.062774922403968
APOBR	DOK3	1	-0.0451756351177501
APOBR	FBP1	1	-0.111089958890633
APOBR	FGR	1	-0.17578921366599898
APOBR	FLVCR2	1	-0.0346149685356557
APOBR	NCF2	1	-0.102293604980563
APOBR	NLRC4	1	-0.0145961074566442
APOBR	PLXNC1	1	-0.00219146521575513
APOBR	SNX10	1	-0.0840452441037671
APOBR	ST14	1	-0.014220965087643998
APOBR	TREM1	1	-0.00930760449970187
APOBR	TREML1	1	-0.00867816237855938
APOC3	FGB	1	-0.0103328874460219
APOC3	FGG	1	-0.0723363948353536
APOD	CFD	1	-0.213301980146195
APOD	CHL1	1	-0.0383840497789126
APOD	CNTFR	1	-0.0485707785971326
APOD	CXCL14	1	-0.104715126399616
APOD	CYGB	1	-0.0656211961116373
APOD	DARC	1	-0.0827198121929361
APOD	DCN	1	-0.0271320183421094
APOD	FAM65C	1	-0.0330307094076102
APOD	GPX3	1	-0.09176319292646101
APOD	GREM1	1	-0.00989712046915263
APOD	IGF2	1	-0.053549290783992995
APOD	L1CAM	1	-0.0640823397668891
APOD	NRN1	1	-0.0560420129654118
APOD	OAF	1	-0.0592998215242453
APOD	RSPO3	1	-0.0337857774881326
APOD	SCN7A	1	-0.000398423852950108
APOD	TSPAN8	1	-0.0276618493087817
APOD	VIT	1	-0.0159101104697306
APOD	WNT11	1	-0.009522532445662441
APOLD1	EDNRB	1	-0.0510725587342932
APOLD1	EGR2	1	-0.0433308533275805
APOLD1	F8	1	-0.0705743982763794
APOLD1	FAM107A	1	-0.0544275906840875
APOLD1	FOSL2	1	-0.0333842631694697
APOLD1	ITPKC	1	-0.0211827988157923
APOLD1	NOSTRIN	1	-0.0100679472158699
APOLD1	RASIP1	1	-0.037292471124223
APOLD1	SDPR	1	-0.20259748129174
APOLD1	SIK1	1	-0.199715905532298
APOLD1	SLC19A2	1	-0.0561423582179155
APOLD1	SOX17	1	-0.0275107344920357
APOLD1	STC1	1	-0.131236637673702
APOLD1	THBS1	1	-0.0406627187679534
APOLD1	TMEM88	1	-0.0202091427028319
APP	CNTN5	1	-0.0173789374355948
APP	PARM1	1	-0.069366146995904
APP	RGS5	1	-0.0714641064775378
APP	SCRN1	1	-0.04779830059175599
APRT	CUEDC1	1	-0.0047633591903763605
APRT	EDA	1	-0.00794634259496543
APRT	GTF3C4	1	0.0132363854250869
APRT	LRRC45	1	-0.00137143122268935
APRT	MFAP1	1	0.0109997494501934
APRT	RNPEPL1	1	-0.0301283918521202
APRT	ZSWIM3	1	0.00315902029582959
AQP9	C19orf59	1	-0.21036922724089
AQP9	CSF3R	1	-0.0102454564593691
AQP9	DOK3	1	-0.093840011423553
AQP9	FGR	1	-0.0980494833252942
AQP9	IL1R2	1	-0.072590273156006
AQP9	NBEAL2	1	-0.0335015539445245
AQP9	NCF2	1	-0.0507651889422655
AQP9	NFE2	1	-0.00830467998193367
AQP9	PLXNC1	1	-0.00266375418814292
AQP9	SORL1	1	-0.0131425689168498
AQP9	STXBP2	1	-0.0380061500966363
AQP9	TREM1	1	-0.18137829499449898
AQPEP	CFD	1	-0.008258139903547521
AQPEP	FIGF	1	-0.007092686122515091
AR	CHD1L	1	0.0118336177883215
AR	PLCL1	1	-0.009745176832521341
AR	PPFIA4	1	0.00675479753633269
AR	PPM1L	1	-0.0053843344998382395
AR	PTP4A3	1	0.0103503948948809
AR	PTPN13	1	-0.0250707544412167
ARAP2	ITK	1	-0.0467182013688747
ARAP3	CDH5	1	-0.00374877855326041
ARAP3	CLEC14A	1	-0.0132264979410463
ARAP3	NOTCH4	1	-0.0586636671857591
ARAP3	SHANK3	1	-0.00853237934764064
ARC	KDM6B	1	-0.1021236714566
ARC	NFATC2	1	-0.0890525384795961
ARF3	PTPRG	1	-0.0247018579103934
ARF3	RGP1	1	-0.06181153046404099
ARG1	CMTM2	1	-0.0394239345551664
ARG1	CSF3R	1	-0.0745317235955059
ARG1	FAM65B	1	-0.0416566368107406
ARG1	GPR97	1	-0.108445709295431
ARG1	IL18RAP	1	-0.0755160863549213
ARG1	IL1R2	1	-0.0035638848753672204
ARG1	MMP25	1	-0.0760434065463335
ARG1	NFE2	1	-0.110828618930867
ARG1	PROK2	1	-0.0794279922564847
ARG1	S100A12	1	-0.158904029288048
ARG1	S100A8	1	-0.0610875203563791
ARG1	S100P	1	-0.106465149320509
ARG1	VNN2	1	-0.0172470028154871
ARGLU1	CREBZF	1	-0.0248646698320996
ARGLU1	LUC7L3	1	-0.192189288266101
ARGLU1	MAPRE3	1	-0.00935022407019238
ARGLU1	OGT	1	-0.0272974122356915
ARGLU1	PNISR	1	-0.123563293285525
ARGLU1	SRSF11	1	-0.0323326927080741
ARHGAP10	ATP10A	1	-0.028040563162632003
ARHGAP10	CCND3	1	-0.0412373022153086
ARHGAP10	CEBPB	1	-0.0410990258282569
ARHGAP10	FBXO42	1	-0.0279542949391823
ARHGAP10	FOXO1	1	-0.0104527872320022
ARHGAP10	KLF15	1	-0.156078835676262
ARHGAP10	LRRC16A	1	-0.0714087849538696
ARHGAP10	MAP3K6	1	-0.0260755572864667
ARHGAP10	NEXN	1	-0.0640774962638944
ARHGAP10	TCEAL1	1	-0.14445038507767402
ARHGAP10	ZBTB16	1	-0.0121917411143864
ARHGAP12	SF3A1	1	0.0407580159985687
ARHGAP12	SPEF2	1	0.00126403570643367
ARHGAP20	MGST1	1	-0.00130995571789206
ARHGAP24	ARHGEF2	1	-0.0268229031326623
ARHGAP24	ARHGEF9	1	-0.0575913019151662
ARHGAP24	CBLB	1	-0.0399111402312589
ARHGAP24	CHSY3	1	-0.0824210030196653
ARHGAP24	CLASP2	1	-0.0725909362591632
ARHGAP24	LMCD1	1	-0.0725440589227052
ARHGAP24	MYOCD	1	-0.0547148753307285
ARHGAP24	PDGFA	1	-0.0695403787102655
ARHGAP24	RUSC2	1	-0.0226367220489639
ARHGAP30	C3AR1	1	-0.0121930308002987
ARHGAP30	CCR1	1	-0.0202303991758587
ARHGAP30	CCR5	1	-0.0277240402758632
ARHGAP30	CD52	1	-0.0726756180178348
ARHGAP30	CERKL	1	-0.0265141364799368
ARHGAP30	CSK	1	-0.0126158829445789
ARHGAP30	DOK3	1	-0.0110632668243287
ARHGAP30	GPR65	1	-0.0628661733327546
ARHGAP30	GPSM3	1	-0.0654621053335273
ARHGAP30	HCK	1	-0.0366860094991874
ARHGAP30	IRF5	1	-0.000635049427078704
ARHGAP30	MNDA	1	-0.0149727186045365
ARHGAP30	MYO1G	1	-0.0123803879774494
ARHGAP30	NUP210	1	-0.0453950094585357
ARHGAP30	PARVG	1	-0.0227568528200464
ARHGAP30	PLCB2	1	-0.0176749958822738
ARHGAP30	POU2F2	1	-0.0117074275290738
ARHGAP30	PTPN6	1	-0.101128839191652
ARHGAP30	RPS6KA1	1	-0.0905193878622186
ARHGAP30	SASH3	1	-0.0963352797051704
ARHGAP30	SELPLG	1	-0.0436293555037322
ARHGAP30	SNX20	1	-0.0400248912920651
ARHGAP30	TYROBP	1	-0.00449093579668183
ARHGAP30	WAS	1	-0.00741836186770344
ARHGAP30	WDFY4	1	-0.111676111815091
ARHGAP32	MLLT4	1	-0.0150239083418971
ARHGAP35	HIRA	1	-0.00315590533977529
ARHGAP35	MTERFD1	1	0.00553955006066331
ARHGAP35	PSKH1	1	-0.0290018311616967
ARHGAP4	CACNA2D4	1	-0.00268749527720214
ARHGAP4	CARD9	1	-0.0495974229370287
ARHGAP4	CCDC88B	1	-0.00364201205505869
ARHGAP4	DEF6	1	-0.0217752976651645
ARHGAP4	DENND1C	1	-0.02243651531496
ARHGAP4	DOCK2	1	-0.0228941694354997
ARHGAP4	FMNL1	1	-0.0123894584503553
ARHGAP4	HCST	1	-0.00328994557389564
ARHGAP4	HMHA1	1	-0.0577377267559586
ARHGAP4	ILK	1	-0.0198651425465749
ARHGAP4	PARVG	1	-0.0505822591614693
ARHGAP4	PLCB2	1	-0.12622367229195802
ARHGAP4	PTPN6	1	-0.00781810918044327
ARHGAP4	SPI1	1	-0.0284505028342089
ARHGAP4	STAB1	1	-0.179087266629031
ARHGAP4	STXBP2	1	-0.0405133379521374
ARHGAP4	TGFB1I1	1	-0.00827386066452133
ARHGAP4	TMC8	1	-0.0192996145239681
ARHGAP4	WAS	1	-0.0346917878547969
ARHGAP4	ZYX	1	-0.0485701431957654
ARHGAP44	DENND2D	1	0.00463626160186937
ARHGAP44	ID1	1	-0.046889191541219
ARHGAP44	IGFBPL1	1	0.0249443272794342
ARHGAP44	LOXL4	1	0.0206589560733834
ARHGAP44	SELENBP1	1	-0.0114034636891454
ARHGAP44	SEPT4	1	-0.0022720719206291897
ARHGAP44	TBX2	1	-0.0393285641395035
ARHGAP6	NFIC	1	-0.0255012537401474
ARHGAP9	CCDC88B	1	-0.0227452964687796
ARHGAP9	CD7	1	-0.0105105427094537
ARHGAP9	CST7	1	-0.11743633454697801
ARHGAP9	DENND1C	1	-0.0425803974333861
ARHGAP9	FGD3	1	-0.0535401414581121
ARHGAP9	FMNL1	1	-0.111057282642532
ARHGAP9	GPSM3	1	-0.0895513684284747
ARHGAP9	HMHA1	1	-0.0228758121670781
ARHGAP9	MYO1F	1	-0.124190297411054
ARHGAP9	NCF4	1	-0.0467330994662851
ARHGAP9	PLCB2	1	-0.0540335757231467
ARHGAP9	PTPRC	1	-0.0621115054406547
ARHGAP9	RAC2	1	-0.0324197078352945
ARHGAP9	RNF166	1	-0.0036515892450383297
ARHGAP9	STXBP2	1	-0.0664649534713216
ARHGAP9	TACC3	1	-0.00163227216356288
ARHGAP9	WAS	1	-0.017858975929691004
ARHGDIB	ERP27	1	-0.101467006850766
ARHGDIB	MGP	1	-0.0265098138715265
ARHGEF1	DENND1C	1	-0.00865065051648768
ARHGEF10	TJP2	1	-0.0156565295810327
ARHGEF10L	ASB2	1	-0.0322470021369482
ARHGEF10L	BHLHE41	1	-0.0241151281257609
ARHGEF10L	CAMK2G	1	-0.008245197017793459
ARHGEF10L	CDC42SE1	1	0.0193487665573326
ARHGEF10L	CTGF	1	0.000998723620259732
ARHGEF10L	FAM102B	1	0.0332780077271064
ARHGEF10L	IKZF4	1	0.00041370909176387596
ARHGEF10L	INPP5A	1	-0.0535372639456368
ARHGEF10L	JPH2	1	-0.0470451487490801
ARHGEF10L	KBTBD13	1	-0.10023889170493501
ARHGEF10L	KCNK9	1	-0.0203909197476359
ARHGEF10L	KCNQ4	1	-0.0478952852325472
ARHGEF10L	MARCH1	1	-0.0107967779842499
ARHGEF10L	MARVELD1	1	-0.0110090576883107
ARHGEF10L	MPC1	1	-0.0226866963875896
ARHGEF10L	MRVI1	1	-0.0371895931523398
ARHGEF10L	NLGN2	1	0.017106506458105
ARHGEF10L	NRROS	1	-0.0171246462816487
ARHGEF10L	PDLIM7	1	-0.0638735232102956
ARHGEF10L	PIK3AP1	1	-0.0051180692548544295
ARHGEF10L	PRDM16	1	-0.0793410427338761
ARHGEF10L	PRKAG2	1	-0.0272881884493138
ARHGEF10L	PTP4A3	1	-0.0602379926739867
ARHGEF10L	RASL12	1	-0.00535503518242104
ARHGEF10L	RASSF3	1	-0.000375014143974839
ARHGEF10L	RBM38	1	-0.12516700270693498
ARHGEF10L	SLC15A4	1	-0.0386525662526681
ARHGEF10L	SPEG	1	-0.126018521223648
ARHGEF10L	WDR1	1	-0.0102111633252708
ARHGEF17	EP300	1	-0.0143185099365298
ARHGEF17	IQSEC1	1	-0.0207193870614915
ARHGEF17	RABGAP1	1	-0.0174996864786585
ARHGEF17	RP11-1055B8.7	1	-0.0846553528671345
ARHGEF17	RRAD	1	-0.0126937984469451
ARHGEF2	CEBPG	1	-0.0208297092636675
ARHGEF2	DAPK3	1	-0.0339359386138051
ARHGEF2	EHD4	1	-0.0258401355958456
ARHGEF2	GARS	1	-0.0316857134266619
ARHGEF2	GTPBP2	1	-0.0439120291971339
ARHGEF2	HDAC9	1	-0.074635627132517
ARHGEF2	SLC20A2	1	-0.0125068314652599
ARHGEF2	SLC7A1	1	-0.0405437178185689
ARHGEF2	YWHAH	1	-0.0297250364666339
ARHGEF25	SLC26A10	1	-0.18221260195753303
ARHGEF26	CDC37L1	1	-0.000456428440992276
ARHGEF26	MAP3K6	1	-0.0334547989653701
ARHGEF26	MPP3	1	-0.000215830599083196
ARHGEF26	PRR16	1	-0.0269979246048078
ARHGEF28	C11orf24	1	0.0157207634571506
ARHGEF28	C1orf226	1	-0.103641767922283
ARHGEF28	CADPS2	1	-0.00947969957772696
ARHGEF28	CDO1	1	-0.109657460924416
ARHGEF28	F8	1	-0.0228739931860947
ARHGEF28	FGF10	1	-0.0203325192425599
ARHGEF28	FOXD1	1	0.0005742192393884821
ARHGEF28	FRYL	1	-0.0032716683699343
ARHGEF28	GLRB	1	-0.00351542519823255
ARHGEF28	GNAZ	1	-0.008859629580737709
ARHGEF28	GNG12	1	0.00418452669465836
ARHGEF28	GPC4	1	-0.00652789429162498
ARHGEF28	GYG2	1	-0.00162754223070766
ARHGEF28	HAND2	1	-0.167339873462866
ARHGEF28	LRBA	1	-0.0425671705591233
ARHGEF28	MAOB	1	-0.0170631038652826
ARHGEF28	MARCH1	1	0.0202142629761952
ARHGEF28	MDFI	1	-0.0986973222640479
ARHGEF28	MLIP	1	-0.0382686026281995
ARHGEF28	NEO1	1	-0.0336811056314328
ARHGEF28	NR2F1	1	-0.0130974607908806
ARHGEF28	PTPRK	1	-0.0149306724832446
ARHGEF28	RASSF3	1	0.0575144219044622
ARHGEF28	RBM20	1	-0.0570893887607938
ARHGEF28	RGS5	1	0.0248014613631916
ARHGEF28	RUVBL1	1	-0.0328786249331033
ARHGEF28	SEMA3G	1	-0.006444031678814129
ARHGEF28	SLC17A9	1	0.0262612995447857
ARHGEF28	TFEC	1	0.0840323914592019
ARHGEF28	TGFBR2	1	-0.000670361765283515
ARHGEF28	THBS1	1	-0.00013446343191153201
ARHGEF28	TMEM255B	1	-0.0101868077162931
ARHGEF28	WT1	1	-0.017725922776794998
ARHGEF3	HIPK3	1	-0.0037293657272566704
ARHGEF3	SBNO2	1	-0.0268963500116843
ARHGEF37	C1orf226	1	-0.0230812163217466
ARHGEF37	C9orf37	1	0.0100551287232505
ARHGEF37	MGLL	1	-0.0135464034141632
ARHGEF37	MRPS6	1	-0.0848926630590833
ARHGEF37	PLOD2	1	-0.00045711388521393204
ARHGEF37	RXRA	1	-0.0153445277418225
ARHGEF37	WSCD1	1	-0.0470725163358895
ARHGEF40	GLIS2	1	-0.0157230389900209
ARHGEF40	PPP1R12A	1	0.00891202464338645
ARHGEF40	UTP20	1	0.00457391185101689
ARHGEF9	EFNA5	1	0.0246052827698054
ARHGEF9	GPR176	1	-0.0112750203517376
ARHGEF9	KIFC3	1	-0.11317291018539502
ARHGEF9	LYPLAL1	1	-0.0091301531929936
ARHGEF9	MRVI1	1	-0.0792339695217129
ARHGEF9	MYO1E	1	-0.0301106848700209
ARHGEF9	PICALM	1	-0.0031873866902855
ARHGEF9	PLS3	1	-0.0630832337867681
ARHGEF9	RANBP3L	1	0.0114248440156815
ARHGEF9	REM1	1	-0.0266249254758852
ARHGEF9	SLC20A2	1	-0.00829955006536914
ARHGEF9	TC2N	1	-0.0113841479995596
ARHGEF9	WDR1	1	-0.0022571699663579397
ARHGEF9	YWHAH	1	-0.0190743122764106
ARID1A	BCL9L	1	-0.115141262281646
ARID1A	DVL1	1	0.0246602369154911
ARID1A	RPRD2	1	-0.024472517269255003
ARID2	NFIA	1	-0.00541279459866855
ARID4A	TSC22D4	1	-0.0112113946949918
ARID5A	ARID5B	1	-0.0375364474130778
ARID5A	AUTS2	1	-0.0227576782346048
ARID5A	BACH1	1	-0.071438895465521
ARID5A	BAMBI	1	-0.17108722171361598
ARID5A	C11orf96	1	-0.0462956852991756
ARID5A	C17orf82	1	-0.00843449364992487
ARID5A	CREB5	1	-0.171972427730534
ARID5A	FIBIN	1	-0.11379019143943699
ARID5A	FRY	1	-0.036944040911345004
ARID5A	GAREM	1	-0.0442796599851356
ARID5A	IQCJ-SCHIP1	1	-0.156815240951574
ARID5A	LMCD1	1	-0.164009281963954
ARID5A	LRFN3	1	-0.04779502542723599
ARID5A	NEDD9	1	-0.14855126927293696
ARID5A	RGS3	1	-0.0647463780420331
ARID5A	RP11-279O9.4	1	-0.0571971475102783
ARID5A	SACS	1	-0.009542036345479309
ARID5A	SMARCD2	1	0.0364368108839135
ARID5A	STK38L	1	-0.15795655656923802
ARID5A	TNFRSF12A	1	-0.0159826545661194
ARID5A	TUSC1	1	-0.0636791235662599
ARID5A	ZBTB21	1	-0.0380893207508406
ARID5B	BCL9L	1	0.00419547083660463
ARID5B	BCOR	1	0.00904559722241353
ARID5B	C5orf54	1	0.00104782896303016
ARID5B	CASP12	1	-0.0011529241465833
ARID5B	CREB5	1	-0.0635823051755369
ARID5B	CTGF	1	-0.0440051827594614
ARID5B	DNAJB4	1	-0.12468221837397801
ARID5B	FOSL2	1	-0.10275922274638198
ARID5B	FOXS1	1	0.091093051141364
ARID5B	GAREM	1	-0.0399224576636763
ARID5B	GRAMD3	1	-0.010550710548961
ARID5B	IFRD1	1	-0.00639937229226056
ARID5B	LURAP1L	1	-0.0195732553941169
ARID5B	NDEL1	1	-0.0544587727918717
ARID5B	NEDD9	1	-0.11678540309518
ARID5B	PRKAB2	1	0.0023003993441284
ARID5B	PYGO2	1	0.0646368904262287
ARID5B	RND3	1	-0.07057824096948301
ARID5B	SOX12	1	0.0208458531108812
ARID5B	STK38L	1	-0.0649950576662635
ARID5B	TMEM2	1	-0.0742235309652801
ARID5B	TRIM47	1	0.0512846764688499
ARID5B	TSC22D2	1	-0.0570973695485558
ARID5B	WEE1	1	-0.000315651172620279
ARID5B	ZBTB21	1	-0.0550118348145708
ARL13B	XPO1	1	0.0214965923019064
ARL15	CDA	1	-0.0407193140639514
ARL15	LRRC45	1	-0.00149943542939794
ARL15	PIK3R3	1	-0.0172232936619966
ARL4C	C1QB	1	-0.0140912716920683
ARL4C	CXCR4	1	-0.0463092617798942
ARL4C	GNA13	1	-0.0445509940488897
ARL4C	GPR183	1	-0.0186118436776762
ARL4C	HLA-DMB	1	-0.0133487974996275
ARL4C	IL10RA	1	-0.0684218905237001
ARL4C	MITF	1	-0.0419891799465427
ARL4C	MSR1	1	-0.0477406708533215
ARL4C	RGS1	1	-0.0698375790685931
ARL4C	SDS	1	-0.0569916518188324
ARL4C	SMPDL3A	1	-0.0762363481431679
ARL4C	THEMIS2	1	-0.0439982864352661
ARL4C	TREM2	1	-0.00497781206849587
ARL4D	C17orf59	1	-0.0619146237206765
ARL4D	PLEKHF1	1	-0.0552362595206845
ARL4D	RAB33A	1	-0.0137089307215531
ARL4D	SLC3A2	1	-0.0334756238656239
ARL4D	TRAF4	1	-0.083659110256156
ARL4D	TSC22D4	1	-0.0734442149903648
ARL5B	CCNL1	1	-0.0737865109881872
ARL5B	CDKN1A	1	-0.013322992421902002
ARL5B	ETV3	1	-0.0021771713636349397
ARL5B	GZF1	1	-0.014150574949534998
ARL5B	IL6	1	-0.08173561082410201
ARL5B	IL8	1	-0.030532004175074
ARL5B	KLHL15	1	-0.165559218815995
ARL5B	LIF	1	-0.0847399225808423
ARL5B	MYOCD	1	0.0550421220595914
ARL5B	NR4A2	1	-0.0397550030224416
ARL5B	PELI1	1	-0.0107062646444432
ARL5B	PHLDA1	1	-0.0021667664029406102
ARL5B	PTGS2	1	-0.0170355147779349
ARL5B	TIPARP	1	-0.004567910113363979
ARL5B	TOB1	1	-0.0312615515316127
ARL6IP6	MGAT4B	1	-0.0139110160864307
ARL6IP6	TEX30	1	-0.0177321223909527
ARMC6	BRPF3	1	-0.0266262474731978
ARMC6	CAPN5	1	0.0258278293557334
ARMC6	GAREM	1	-0.000116118536690302
ARMC6	RABEP2	1	-0.0374182218543918
ARMC6	THOP1	1	-0.0282370094443097
ARMC6	TIMM13	1	-0.0045530453006386
ARMC9	HTR2B	1	-0.0478328505986763
ARMCX1	NFKBIL1	1	-0.00566499254124596
[truncated: 83,502 more rows]

## Sheet: Artery − Tibial
Name1	Name2	Edge type	Edge weight
A2M	AKAP1	1	-0.0215871298996783
A2M	ARF3	1	-0.00437065870069316
A2M	ATP9A	1	-0.00388740777300288
A2M	C1R	1	-0.0913046911472246
A2M	CRTAP	1	-0.0227418564259316
A2M	MIB2	1	0.0037997299093880397
A2M	PGP	1	0.004983668829345029
A2M	PSAP	1	-0.0241593267160495
A2M	SPARCL1	1	-0.0174324466062174
A2M	TXNL4A	1	0.00143330084279809
A4GALT	PTGIR	1	-0.0107919191966083
AAAS	MZF1	1	-0.0936198909457184
AAAS	ZMAT1	1	-0.090149112745017
AAK1	SF3A1	1	-0.0105060290920916
AARS	GARS	1	-0.0406963528565729
AARS	IARS	1	-0.0238541608396442
AARS	MARS	1	-0.13320100216051198
AARS	YARS	1	-0.0305871450620595
AATK	CADM4	1	-0.0123167017126882
AATK	FGFBP2	1	-0.0560597668344034
AATK	MPZ	1	-0.141958109093918
AATK	MT3	1	-0.00198813803338741
AATK	PLP1	1	-0.0289702636620682
AATK	PMP2	1	-0.0211847209964148
AATK	S100B	1	-0.057941488633297004
AATK	SFRP5	1	-0.0666986632209894
AATK	SOX10	1	-0.0137275954134735
ABAT	ABHD3	1	-0.0251165982211114
ABAT	C5	1	-0.00235320347098753
ABAT	GCDH	1	-0.118816243812647
ABAT	GYS1	1	-0.018037410409545
ABAT	IZUMO4	1	-0.0357298557011697
ABAT	KLHDC2	1	0.0128097120373021
ABAT	LDHD	1	-0.017563727782836002
ABAT	OXCT1	1	-0.0618939988369592
ABAT	PCYT2	1	-0.17356964330127803
ABAT	PXMP2	1	-0.144652909529602
ABCA1	RNF150	1	-0.0213934976163162
ABCA1	SREBF1	1	-0.12225747332677199
ABCA5	BCAT2	1	-0.0182444821088299
ABCA5	CBLL1	1	0.0017908389323365
ABCA5	CLIP2	1	0.0187872126862076
ABCA5	CLTCL1	1	-0.053899754807222
ABCA5	CNR1	1	-0.135984068553584
ABCA5	COPRS	1	0.0259842452735606
ABCA5	DENND3	1	-0.0022432678800309697
ABCA5	ENTPD6	1	-0.042363553888277
ABCA5	FAM166B	1	-0.0352069020832802
ABCA5	FEZ2	1	-0.0147292403854667
ABCA5	FZD8	1	0.0456830512615301
ABCA5	HERC5	1	0.0703733426715606
ABCA5	KCNB1	1	-0.0480459365319826
ABCA5	KIAA1279	1	-0.00866041352192675
ABCA5	LRRC16A	1	-0.0586377863613952
ABCA5	MAP2K6	1	-0.10867654603911302
ABCA5	NEXN	1	-0.02458629434834
ABCA5	PDGFC	1	0.0200706291059778
ABCA5	PDK3	1	-0.0274699778049891
ABCA5	PKDCC	1	-0.0228249927685079
ABCA5	PQBP1	1	0.00606716680632514
ABCA5	PTPDC1	1	-0.0749740851989869
ABCA5	SLC26A6	1	-0.0359343498167884
ABCA5	SLC7A6	1	-0.0132751279673225
ABCA5	SPINK13	1	-0.001816596694797
ABCA5	STARD4	1	-0.0533497528356966
ABCA5	TNC	1	-0.0182419523452835
ABCA6	ABCA8	1	-0.138238133965389
ABCA6	ANO1	1	0.0099291006027654
ABCA6	ANPEP	1	-0.0133315577449298
ABCA6	AOX1	1	-0.0443445547425975
ABCA6	APOD	1	-0.0102195043108688
ABCA6	BICC1	1	-0.0031601108925767897
ABCA6	C1S	1	-0.0122482069052018
ABCA6	CAB39L	1	-0.0506207898918318
ABCA6	CHRDL1	1	-0.0241161910742418
ABCA6	CYP1B1	1	-0.0108659702655058
ABCA6	CYP4B1	1	-0.07771934237394999
ABCA6	DEPTOR	1	-0.0149924446499524
ABCA6	EBF3	1	-0.0426670146056875
ABCA6	EYA2	1	-0.0103121539634287
ABCA6	FAM65C	1	-0.0478708142657531
ABCA6	FCGRT	1	-0.0299526563236763
ABCA6	FLRT2	1	-0.10634404501353599
ABCA6	KCNS3	1	0.023917616227391005
ABCA6	LAMA2	1	-0.0889936928518537
ABCA6	NID1	1	-0.0365719208529067
ABCA6	PELI3	1	0.020921786730509997
ABCA6	RGS4	1	0.0115484788453297
ABCA6	SLC31A2	1	-0.0240135576680298
ABCA6	SLC9A9	1	-0.00644335862581782
ABCA6	SRPX2	1	-0.116125069253181
ABCA6	UAP1	1	-0.00115386860736261
ABCA6	VIT	1	-0.163092850071404
ABCA6	XPNPEP2	1	-0.0738419583841616
ABCA7	ADAMTSL1	1	0.0249561737910154
ABCA7	CLMP	1	0.00782631146243482
ABCA7	CREM	1	-0.0113678078248752
ABCA7	FBXW5	1	-0.0156971945236094
ABCA7	GALNT2	1	0.005949218184762571
ABCA7	SMOC2	1	0.0017884163226588399
ABCA8	ADD3	1	-0.009618003988000879
ABCA8	APOD	1	-0.0560058444093293
ABCA8	CCDC85C	1	0.0298112184303613
ABCA8	CFD	1	-0.127045284576057
ABCA8	COLEC12	1	-0.0094444806904686
ABCA8	CYP1B1	1	-0.0250389677570583
ABCA8	DLX6	1	0.0138203112981139
ABCA8	EPB41L2	1	-0.000694632393337091
ABCA8	FAM131B	1	0.0301048828978379
ABCA8	FBLN2	1	-0.000136127013563025
ABCA8	FLRT2	1	-0.048442569273716
ABCA8	GAS1	1	-0.0101614056285856
ABCA8	GPC3	1	-0.0242821431661626
ABCA8	ITM2A	1	-0.0477573494023705
ABCA8	KCNH2	1	0.00379552803975871
ABCA8	MGST1	1	-0.00111779658767034
ABCA8	MRAP2	1	-0.000822855206366911
ABCA8	PCDH18	1	-0.00926437906923676
ABCA8	PDGFRL	1	-0.0974663408786404
ABCA8	PODN	1	-0.00503101228144707
ABCA8	RAB3IL1	1	-0.0037265919015444103
ABCA8	RBPMS2	1	-0.0125945470107051
ABCA8	RGL1	1	-0.0822693817762875
ABCA8	SCARA5	1	-0.18517959339784498
ABCA8	SLPI	1	-0.0231476536237863
ABCA8	TMEM158	1	0.077713782812205
ABCA8	VIT	1	-0.0209942047191008
ABCA8	XPNPEP2	1	-0.0165255866635332
ABCA8	ZFHX3	1	-0.0235409942190427
ABCB1	ABI3	1	-0.00446343777794099
ABCB1	HIGD1B	1	-0.0235610008089212
ABCB1	RASGRF2	1	-0.0007122224069479629
ABCB4	FNDC5	1	-0.0135746061031879
ABCB6	BHLHE41	1	-0.0167697514374308
ABCB8	AMIGO1	1	0.0336555629332866
ABCB8	LDB1	1	0.0715439700725039
ABCB8	PNKP	1	-0.000650709312324513
ABCB8	SOX12	1	0.0929739590514641
ABCB8	TCEA2	1	0.0185807690586068
ABCB8	TMCC2	1	0.00227345426095539
ABCB8	TSSC1	1	-0.0424947042949159
ABCB8	UNC13B	1	-0.0306116897965821
ABCC1	CLMP	1	-0.0139301426039496
ABCC5	ANAPC5	1	-0.0199652157729034
ABCC5	ARHGEF2	1	0.0240835400732801
ABCC5	C17orf59	1	0.0541611507632847
ABCC5	DMTF1	1	-0.0202226997610472
ABCC5	FAM173B	1	-0.00339735857101889
ABCC5	FMNL2	1	-0.0105176945594931
ABCC5	PON2	1	-0.0006916389433322901
ABCC5	TIA1	1	-0.00715506813278653
ABCC5	TMEM218	1	-0.0215120084093817
ABCC5	TUBGCP6	1	-0.0185562717536985
ABCC5	ULK3	1	-0.0108386598644111
ABCF3	CDK16	1	-0.0167682260211182
ABCF3	USPL1	1	-0.0647139541826211
ABCG1	CMIP	1	-0.0340493972202973
ABCG1	DLL4	1	-0.00655235534142803
ABCG1	PRKCH	1	-0.0394557346476023
ABCG1	S1PR1	1	-0.0481876094467346
ABCG2	LNX1	1	-0.013135446764583001
ABCG2	NOSTRIN	1	-0.0257798920717512
ABHD14B	CCNI	1	-0.0469425304047988
ABHD14B	CENPT	1	0.0572358242856728
ABHD14B	CRTAP	1	-0.100550323614118
ABHD14B	EEF2	1	-0.0281124889281202
ABHD14B	ENTHD2	1	0.0228393335966273
ABHD14B	MTPN	1	-0.00810016568480051
ABHD14B	NAA10	1	0.019879105167573997
ABHD14B	POMT1	1	0.0026621629802183197
ABHD14B	PSAP	1	-0.0378645534650022
ABHD14B	PSMA4	1	0.0972434056027401
ABHD14B	RPRD2	1	-0.0389367199210323
ABHD14B	SERPING1	1	-0.00882705446916579
ABHD14B	SLC26A10	1	0.0203890121675619
ABHD14B	SSNA1	1	0.0398456461345753
ABHD14B	TNFSF13	1	-0.0448120018295389
ABHD14B	TRIM3	1	0.0118280512064181
ABHD14B	TYK2	1	0.0593972659201586
ABHD14B	ZBTB4	1	-0.0452972794713011
ABHD3	C5	1	-0.00664779495622947
ABHD3	CHD9	1	-0.00586633324424186
ABHD3	IGSF10	1	-0.0127330660639741
ABHD3	ITGA7	1	-0.0006234137798636509
ABHD3	PXMP2	1	-0.109245682181983
ABHD3	SPHK2	1	-0.0108994486060505
ABHD3	TNIP1	1	0.0218453917979003
ABHD8	BAD	1	-0.00651174831238696
ABHD8	CDR2L	1	-0.0591292593866573
ABHD8	FBXL15	1	-0.0356057487577538
ABHD8	NME3	1	-0.00205052034744193
ABHD8	PCYT2	1	0.00075220010367232
ABHD8	PELI3	1	-0.0294394811722557
ABHD8	RIMS3	1	-0.00233786278912835
ABHD8	TMEM240	1	-0.0159252257980746
ABI3	APLNR	1	-0.042811888568872
ABI3	ARHGDIB	1	-0.0155923764151512
ABI3	AVPR2	1	-0.0205406483169495
ABI3	C10orf128	1	-0.0570736654935231
ABI3	CCM2L	1	-0.0435437502024948
ABI3	CD79B	1	-0.0249404348573211
ABI3	EMCN	1	-0.000738875516119775
ABI3	EXOC3L1	1	-0.0165403922748542
ABI3	GPR56	1	-0.0386690063457551
ABI3	HSPA12B	1	-0.0140299172431602
ABI3	MYCT1	1	-0.0475653749842065
ABI3	PLVAP	1	-0.0650864736076614
ABI3	PRKCH	1	-0.035133014009799
ABI3	RASIP1	1	-0.0952300343466916
ABI3	SH2D3C	1	-0.0288172072205613
ABI3	SLCO2A1	1	-0.0139164167726368
ABI3	SNRK	1	-0.00845761782136724
ABI3BP	CILP	1	-0.0187088918679406
ABI3BP	CLU	1	-0.120538790575979
ABI3BP	COLEC12	1	-0.0488107017978196
ABI3BP	CPE	1	-0.0458843434676804
ABI3BP	DCN	1	-0.138412944464328
ABI3BP	DPT	1	-0.00361868337553538
ABI3BP	PLD3	1	-0.0229439182527168
ABI3BP	PSAP	1	-0.0182768537802553
ABI3BP	SCARA5	1	-0.0291751537886221
ABI3BP	SFRP2	1	-0.0105523583966845
ABI3BP	SLIT3	1	-0.0188700444273002
ABI3BP	ZDHHC9	1	-0.09616784583587701
ABL1	ADAMTS15	1	-0.0455436762276638
ABL1	AKAP12	1	-0.0228089193388403
ABL1	AVPI1	1	-0.0132345633317326
ABL1	CCDC107	1	-0.0412215148878901
ABL1	CDIP1	1	-0.0810641730260054
ABL1	CREB3L2	1	-0.000429096225500351
ABL1	CRY2	1	-0.00461781850687633
ABL1	DGKD	1	-0.0237610736571081
ABL1	ELL	1	-0.0944389638650096
ABL1	EMD	1	-0.0779114634887072
ABL1	FBXW5	1	-0.0845406636831612
ABL1	FLNB	1	-0.0052476934940003
ABL1	FOSL2	1	-0.0648032324875483
ABL1	GMDS	1	-0.025568099903694
ABL1	IGSF8	1	-0.0251388210090602
ABL1	PDE4D	1	-0.0887060956174228
ABL1	PIP5K1C	1	-0.00971152194498959
ABL1	SMURF1	1	-0.14305975781155403
ABL1	SNX33	1	-0.0159373798102973
ABL1	SYNM	1	-0.005885286190026679
ABL1	TGM2	1	-0.0225153242855976
ABL1	TRAF2	1	-0.0317641882475921
ABL1	WIPF1	1	-0.0220625655788797
ABLIM1	CD34	1	-0.0489825810677511
ABLIM1	DOCK5	1	-0.0116125507402661
ABLIM1	DPYSL2	1	-0.0290153965097982
ABLIM1	GAS1	1	-0.0806614720491482
ABLIM1	IL15RA	1	-0.007816505208250541
ABLIM1	IRAK3	1	-0.0440713897781648
ABLIM1	ITGB4	1	-0.00142475460308739
ABLIM1	ITIH1	1	0.0197069661729923
ABLIM1	MAOA	1	-0.0108281073813443
ABLIM1	PMP22	1	-0.00998348764368712
ABLIM1	RAMP2	1	-0.00818650331849515
ABLIM1	SCARA5	1	-0.0146259839902337
ABLIM1	SDPR	1	-0.0802256174051064
ABLIM1	SLC6A9	1	0.0814020418477689
ABLIM1	TCN2	1	-0.0069332041423646
ABLIM1	VIT	1	-0.009917549011206341
ABLIM1	ZNF521	1	-0.0303621266140301
ABLIM3	MRGPRF	1	0.0202030512281227
ABR	APOD	1	-0.0154632424831369
ABR	GPR20	1	-0.0847788695293243
ABR	GPRC5C	1	-0.0345483186820861
ABR	INPP5A	1	-0.14738419487520998
ABR	KAZN	1	-0.0236127058587051
ABR	LINGO1	1	-0.131003164345865
ABR	LITAF	1	-0.00288077425391961
ABR	PALD1	1	-0.0326874281296321
ABR	PGF	1	-0.0431959738034432
ABR	RAB23	1	0.00150447326050546
ABR	SORL1	1	-4.2107723163709005e-05
ABR	TRPC4	1	0.0101064233899482
ABR	ZBTB7C	1	-0.0553092173510479
ABRA	ARID5A	1	-0.0697064502168406
ABRA	BDNF	1	-0.0226701191785563
ABRA	BMP2	1	-0.00507901662614169
ABRA	CPEB4	1	-0.0129847596622971
ABRA	CRY1	1	-0.0287540787279664
ABRA	DAB2IP	1	0.00323591047027009
ABRA	DNAJA4	1	-0.00425288208819547
ABRA	DNAJB4	1	-0.0725612376897304
ABRA	FILIP1L	1	-0.12475607238940599
ABRA	GAREM	1	-0.0373668812494991
ABRA	HSPH1	1	-0.035188208284925006
ABRA	IFRD1	1	-0.12109730412093699
ABRA	MYOCD	1	-0.114290885938798
ABRA	STK38L	1	-0.065954766575512
ABRA	TSC22D2	1	-0.0400011541362372
ABTB1	SPSB3	1	-0.0468324200562413
AC107021.1	ANKRD37	1	-0.0692177088649094
AC107021.1	BHLHE41	1	-0.0157756310482393
AC107021.1	KDM3A	1	-0.047138585360277
AC107021.1	LOX	1	-0.0797598624709902
AC107021.1	PLOD2	1	-0.0656242167959184
AC107021.1	SHMT2	1	-0.0107084878832852
AC107021.1	SLC2A1	1	-0.0696869679906033
AC107021.1	ZNF395	1	-0.12146609292365199
AC117395.1	PFN2	1	-0.0016061000631969599
ACACA	MLEC	1	-0.0514422092832562
ACAD11	CENPT	1	-0.0256051504388238
ACAD11	KLHDC2	1	-0.0488846534835191
ACAD11	KMT2E	1	0.017955633092303
ACAD11	PHACTR1	1	0.009166426061052991
ACAD11	POLR2A	1	0.008367408540668109
ACAD11	PRSS53	1	-0.0161611055418663
ACAD11	THSD4	1	0.0249442733602653
ACAD11	TIAL1	1	-0.0769750226316088
ACAD11	YWHAG	1	0.0370456012023026
ACAD11	ZC3H13	1	0.0350855956517527
ACAD11	ZNF692	1	-0.0378292799591665
ACADL	BRSK2	1	-0.041940905874584995
ACADL	FAM166B	1	-0.0789859531515972
ACADL	GREB1L	1	-0.130821287004904
ACADL	LRRC4B	1	0.0205424692787671
ACADL	SLC26A6	1	-0.0398567407648946
ACADL	SLC7A6	1	-0.0056735397066908395
ACADVL	CAT	1	-0.0330074760822685
ACADVL	ECH1	1	-0.00697600318407469
ACAP3	ADRM1	1	-0.00590381765689369
ACAP3	C1orf122	1	-0.0250096890062176
ACAP3	C9orf142	1	-0.0272454153098879
ACAP3	CCNL2	1	-0.0498869368146509
ACAP3	CENPT	1	-0.0557122582075309
ACAP3	COMTD1	1	-0.0322519351690671
ACAP3	DDX39A	1	-0.121130209578744
ACAP3	DGAT1	1	-0.03329578168519
ACAP3	ENDOG	1	-0.064978266330636
ACAP3	GLRX2	1	-0.0258163551502592
ACAP3	ISOC2	1	-9.04700858068812e-05
ACAP3	KDELR1	1	0.0046761135117568
ACAP3	KLC2	1	-0.00268907185409244
ACAP3	KLHL17	1	-0.0207623894776459
ACAP3	LMF2	1	-0.0207540671569381
ACAP3	MARS	1	-0.0520199185715749
ACAP3	MFSD3	1	-0.00371756413955809
ACAP3	MIB2	1	-0.0801318651138638
ACAP3	NEK7	1	-0.0162279146884113
ACAP3	PACS2	1	-0.0115454707426979
ACAP3	PGP	1	-0.0145279767663481
ACAP3	SLC52A2	1	-0.0499157594988162
ACAP3	TMEM259	1	-0.0808658846262148
ACAP3	TNS1	1	0.0514071369665796
ACAP3	TPP1	1	0.00825712845116007
ACAP3	TRABD	1	-0.00300549868195959
ACAP3	ULK3	1	-0.00746931839051758
ACAP3	ZNF692	1	-0.0190492377362328
ACKR3	AVPI1	1	-0.063205314871412
ACKR3	C11orf96	1	-0.0999318229828275
ACKR3	CREM	1	-0.0028227571219541802
ACKR3	FOXC1	1	-0.0890021659000657
ACKR3	GPR183	1	-0.0127821464487686
ACKR3	JUNB	1	-0.0596924461981254
ACKR3	METRNL	1	-0.0804441569468894
ACKR3	NFIL3	1	-0.0185653689738215
ACKR3	NR4A2	1	-0.10158122791132002
ACKR3	NR4A3	1	-0.0474096574430341
ACKR3	RASSF1	1	-0.0074699042253882
ACKR3	RNF122	1	-0.00848083439779693
ACLY	HNRNPA2B1	1	-0.00849960750065971
ACLY	LIPA	1	-0.0679005128395642
ACOX2	POMT1	1	-0.0141995836380564
ACOX2	PSMA4	1	-0.0181196645823345
ACOX2	RABGGTA	1	-0.00174721000147379
ACP5	ARL4C	1	-0.0640391696066473
ACP5	CCL18	1	-0.0716724486167255
ACP5	SDS	1	-0.0726356337527451
ACSF2	ARHGEF40	1	-0.00181752450669765
ACSF2	PINK1	1	-0.00613478034883928
ACSL1	ALOX15B	1	-0.0145515604919483
ACSL1	BACH1	1	0.0133196135632519
ACSL1	IRAK3	1	-0.0128617832073234
ACSL1	SLA	1	-0.038558785693735
ACSL5	CFI	1	-0.0018170985616018397
ACSL5	CMIP	1	-0.0280187279391957
ACSL5	DOCK4	1	-0.0368188541556798
ACSL5	DOCK9	1	-0.0354177976011577
ACSL5	ECSCR	1	-0.0646017515724894
ACSL5	FAM107A	1	-0.0123497343362681
ACSL5	FLI1	1	-0.0248959376367382
ACSL5	GIMAP4	1	-0.0160411178147621
ACSL5	GPR56	1	-0.0479973775409993
ACSL5	HOXB7	1	-0.00681373518436901
ACSL5	HYAL2	1	-0.0207375140328125
ACSL5	ICAM2	1	-0.00241968936778454
ACSL5	LDB2	1	-0.012585651026431001
ACSL5	MECOM	1	-0.0314919977641415
ACSL5	MPZL2	1	-0.00899994729936557
ACSL5	MYCT1	1	-0.0517255946846601
ACSL5	PLCG2	1	-0.0536456702414625
ACSL5	PLEKHG1	1	-0.0548215218553304
ACSL5	PTPRB	1	-0.00744332021128017
ACSL5	RAMP2	1	-0.0332700791559445
ACSL5	S1PR1	1	-0.0651972602134087
ACSL5	SHANK3	1	-0.0183545700024505
ACSL5	SLCO4A1	1	-0.0134738236896576
ACSL5	TCN2	1	-0.0185766634281397
ACSL5	TEK	1	-0.10922510441845
ACSL5	TSPAN7	1	-0.04960693828534599
ACSS1	HDAC7	1	-0.0285324742436271
ACSS1	HSPA13	1	0.0133934203639673
ACSS2	TMEM35	1	-0.0356058303708835
ACTA1	CKM	1	-0.04665768566553599
ACTA1	MB	1	-0.0428962644534903
ACTA1	MYBPC1	1	-0.0419933875530051
ACTA1	MYL1	1	-0.007840993354541791
ACTA1	MYLPF	1	-0.0387143574567273
ACTC1	CFL2	1	-0.0187390112624029
ACTC1	CRYAB	1	-0.00449174191410664
ACTG2	ANKRD13A	1	-0.0193037134869735
ACTG2	AP2S1	1	-0.00475157674343668
ACTG2	CFL2	1	-0.16337510953180404
ACTG2	CKB	1	-0.0339019524477013
ACTG2	CNN1	1	-0.25823710617434503
ACTG2	COPRS	1	0.0166443794191415
ACTG2	CORO1C	1	-0.0683380664320124
ACTG2	CSRP1	1	-0.13615800640984102
ACTG2	CYFIP2	1	-0.126113895155412
ACTG2	DCP1B	1	-0.0632339941860014
ACTG2	DES	1	-0.00515019621185033
ACTG2	GATM	1	-0.0246308509922076
ACTG2	GLIPR2	1	-0.0237808243030788
ACTG2	ILK	1	-0.0887148698773549
ACTG2	ITGA7	1	-0.0464662918703094
ACTG2	ITIH3	1	-0.0113209304461241
ACTG2	MSRB1	1	-0.23896869757386302
ACTG2	MYL6	1	-0.0931517884695124
ACTG2	NCKAP1L	1	-0.0318269922926721
ACTG2	NFATC4	1	-0.0055870078980832395
ACTG2	PARVA	1	-0.00242484212131171
ACTG2	PDLIM7	1	-0.176642617589531
ACTG2	RGS19	1	-0.0205148327998728
ACTG2	SMTN	1	-0.00498137589170412
ACTG2	SYNM	1	-0.0761589934205857
ACTG2	TAGLN	1	-0.0581036948228452
ACTG2	TNC	1	-0.0936478635894047
ACTG2	TPM2	1	-0.17285956978749697
ACTG2	WDR1	1	-0.00518010491839151
ACTG2	YWHAH	1	-0.02763858832955
ACTG2	ZYX	1	-0.14671528284360502
ACTN2	FILIP1	1	-0.0567512355985776
ACTN2	PRDM6	1	-0.0112828240059345
ACVR1B	CUTA	1	0.0069585917217736
ACVR1B	IFNGR1	1	-0.0356395028252745
ACVR1B	IGF2	1	-0.019970138981108998
ACVR1B	RHOBTB3	1	-0.0289437037469852
ACVR1C	ANGPT4	1	-0.00326220742625724
ACVR1C	CYTIP	1	-0.27789837383159305
ACVR1C	ERMN	1	-0.142342017690624
ACVR1C	LINGO1	1	-0.0112342488001345
ACVR1C	RORB	1	-0.0197889241239664
ACVR1C	SNCAIP	1	-0.0867729849498164
ACY1	FUOM	1	-0.0387490921022756
ACY1	MKS1	1	-0.0116296793320046
ACY1	PARP3	1	-0.00252032889403215
ACY1	RASL12	1	0.000771214790524125
ACY1	RUVBL1	1	-0.0368204050948231
ACY1	SCFD2	1	-0.0461329600690041
ACY1	TRAF3IP3	1	0.0106634138474723
ACY1	WAC	1	0.0223984772376322
ADA	CD248	1	-0.017039971741961
ADA	OAF	1	-0.0616474785509244
ADA	VIT	1	-0.0393475321743232
ADAM15	ADCY4	1	-0.0368873061947058
ADAM15	CCM2L	1	-0.0759037288948258
ADAM15	HSPA12B	1	-0.0356528683439493
ADAM15	HYAL2	1	-0.078975563874758
ADAM15	RASIP1	1	-0.0585127901056799
ADAM15	SHANK3	1	-0.0063780806550253
ADAM15	SLC9A3R2	1	-0.0100422645915737
ADAM19	CLMN	1	0.0267704452224398
ADAM19	DPYSL3	1	-0.00572804993999536
ADAM19	FHOD3	1	-0.00772644939555454
ADAM19	GATM	1	-0.0141498487374181
ADAM19	PHLDB2	1	-0.0660463792457418
ADAM22	ADCY1	1	-0.0282781353576603
ADAM22	GPC5	1	-0.0617320252744635
ADAM22	LRRN3	1	-0.0644008623121913
ADAM22	NELL1	1	-0.0459234287669094
ADAM22	PTN	1	-0.0223790403142021
ADAM22	TSPAN11	1	-0.0646716512623653
ADAM28	ALOX5	1	-0.0649830322001294
ADAM28	AMICA1	1	-0.0214718015367324
ADAM28	AOAH	1	-0.00195456419129252
ADAM28	CD37	1	-0.0353329215695127
ADAM28	CD72	1	-0.0465903589146967
ADAM28	CD86	1	-0.0700282531624829
ADAM28	CXCR4	1	-0.0341516484792684
ADAM28	DEF6	1	-0.00640953064848293
ADAM28	FMNL1	1	-0.0237581756690617
ADAM28	GNA15	1	-0.00198303977116735
ADAM28	GPR183	1	-0.00473230736391161
ADAM28	HLA-DMB	1	-0.079645987511381
ADAM28	HLA-DPB1	1	-0.00576523347486209
ADAM28	IL10RA	1	-0.0325266283484875
ADAM28	INPP5D	1	-0.0310629066577298
ADAM28	KYNU	1	-0.0191576251027352
ADAM28	MYO1G	1	-0.0859750295965857
ADAM28	PTPRC	1	-0.11986799506966099
ADAM28	PTPRE	1	-0.00782448864221178
ADAM28	RPS6KA1	1	-0.0130594432725949
ADAM28	THEMIS2	1	-0.00872741835091783
ADAM28	TRAF3IP3	1	-0.0667371550737731
ADAM28	VMO1	1	-0.132300286013584
ADAM28	ZMYND15	1	-0.0757647531477209
ADAM8	APOBR	1	-0.130868031069672
ADAM8	AQP9	1	-0.0561470934469876
ADAM8	C15orf48	1	-0.00993439951818931
ADAM8	DOK3	1	-0.0513358260277142
ADAM8	FMNL1	1	-0.0473104539043339
ADAM8	KYNU	1	-0.0484375496058187
ADAM8	MMP9	1	-0.0348476146512852
ADAM8	MYO1F	1	-0.0244632719572164
ADAM8	MYO1G	1	-0.0462105087940874
ADAM8	OSM	1	-0.0224742289131235
ADAM8	TREM1	1	-0.0940339832775533
ADAM9	COL4A1	1	-0.00297535977162117
ADAM9	SAMSN1	1	-0.00804929071445956
ADAM9	SLA	1	-0.00813163879935995
ADAMTS1	BTG2	1	-0.0820315575851444
ADAMTS1	C11orf96	1	-0.0269936686148499
ADAMTS1	CDKN1A	1	-0.0518182259278866
ADAMTS1	FOSL2	1	-0.140817525732442
ADAMTS1	ID4	1	-0.0195117191392468
ADAMTS1	ITPRIP	1	-0.0440264081083398
ADAMTS1	JUNB	1	-0.0653502899642877
ADAMTS1	NFIL3	1	-0.0886592927523457
ADAMTS1	NR4A2	1	-0.0136115773590597
ADAMTS1	NR4A3	1	-0.0173192903098519
ADAMTS1	PDGFRB	1	-0.0030717398743484604
ADAMTS1	RHOB	1	-0.0557765362101468
ADAMTS1	TOB1	1	-0.0366401860301131
ADAMTS10	RBM14	1	0.0378765459349697
ADAMTS10	SPRYD3	1	0.00897694671061563
ADAMTS12	COL4A2	1	-0.00433605392685129
ADAMTS12	FHOD3	1	-0.0162050246784333
ADAMTS15	ADAMTS8	1	-0.123813457230354
ADAMTS15	BCOR	1	-0.11300480234979302
ADAMTS15	CASP12	1	0.0283535422011215
ADAMTS15	COL4A3BP	1	-0.0372281734877036
ADAMTS15	EMD	1	-0.0108610911227423
ADAMTS15	FAM181B	1	0.0201295127986875
ADAMTS15	FRMD4A	1	-0.000855988136782629
ADAMTS15	KIAA1279	1	-0.0906187773985418
ADAMTS15	KIFC3	1	0.0237747990491701
ADAMTS15	KLHL26	1	-0.124954705193807
ADAMTS15	MNT	1	-0.0151092940197122
ADAMTS15	MOB2	1	-0.0584966778368133
ADAMTS15	MRPL14	1	0.0198710409470912
ADAMTS15	NFIL3	1	-0.0474979596154231
ADAMTS15	NPR3	1	-0.0354968067155826
ADAMTS15	NR4A3	1	-0.00253622415128491
ADAMTS15	RAB20	1	-0.0271390739698393
ADAMTS15	SH3BP4	1	-0.0552061091281833
ADAMTS15	SIK1	1	-0.0134490976309753
ADAMTS15	SMARCA2	1	-0.0227219519700911
ADAMTS15	SPTB	1	-0.0098372981419826
ADAMTS15	TGM2	1	-0.0492599545313233
ADAMTS15	TOB1	1	-0.0404253987965154
ADAMTS15	TUBA8	1	-0.00217549812218375
ADAMTS15	ZDHHC1	1	0.0219595798311667
ADAMTS2	BMP1	1	-0.0385159285796917
ADAMTS2	COL5A1	1	-0.00349720009087817
ADAMTS2	NID1	1	-0.000174297891380407
ADAMTS2	RASSF4	1	-0.0029168855159785604
ADAMTS2	TMEM59L	1	-0.0261287872713284
ADAMTS3	SLC44A1	1	-0.00250125652031155
ADAMTS3	SVEP1	1	-0.0569547828593705
ADAMTS5	NTN4	1	-0.00960434888379502
ADAMTSL1	EFNA5	1	-0.0203053781089209
ADAMTSL1	FARP1	1	0.007276700790728041
ADAMTSL1	HOXA11	1	0.0930532572143051
ADAMTSL1	HOXA13	1	0.0900340030202604
ADAMTSL1	NPR1	1	-0.0488400271971743
ADAMTSL1	OGN	1	-0.0251242490800814
ADAMTSL1	PRDM6	1	-0.0472536970989211
ADAMTSL4	ANGPTL1	1	-0.0201183875998445
ADAMTSL4	BMP1	1	-0.0263852477662408
ADAMTSL4	GPR64	1	-0.00659209403779716
ADAMTSL4	ODC1	1	-0.00731008326565887
ADAMTSL5	RORB	1	0.0495385216186281
ADARB1	BICD1	1	0.0268147120070835
ADARB1	CAMK2G	1	-0.0549275935520777
ADARB1	LITAF	1	-0.0390913313419167
ADARB1	RASSF3	1	-0.0168045032694653
ADAT2	C15orf41	1	-0.0413780954061658
ADAT2	LZTR1	1	-0.00326491848285236
ADAT2	MEIS1	1	-0.030876297782177004
ADAT2	TSSC1	1	-0.014255727775014
ADC	PRKAG2	1	0.0457640040509065
ADC	TGFB1	1	-0.0354590148226063
ADCK1	DGAT1	1	-0.0481593254774462
ADCK1	MTF1	1	0.00430275066675612
ADCK1	RABGGTA	1	-0.00905240224559665
ADCK1	UBL7	1	-0.0166408280392019
ADCK1	ZBTB4	1	0.0018739574381634603
ADCY2	VASH1	1	0.000822998970366289
ADCY3	FNIP2	1	0.00322409708202144
ADCY3	LIFR	1	-0.0345293254477987
ADCY3	RAB6B	1	-0.0174797446133897
ADCY4	C10orf128	1	-0.0994921912091587
ADCY4	CCM2L	1	-0.0671511000747113
ADCY4	CDH5	1	-0.0249384922822813
ADCY4	CPLX1	1	-0.100811562815658
ADCY4	CYYR1	1	-0.0559150948231329
ADCY4	DARC	1	-0.0252345993481278
ADCY4	ECSCR	1	-0.0599178284608138
ADCY4	EGFL7	1	-0.09234786578999199
ADCY4	ELK3	1	-0.00626715796651364
ADCY4	EPHB4	1	-0.164816002364065
ADCY4	FLI1	1	-0.0413423998029285
ADCY4	GIMAP7	1	-0.0459685948749239
ADCY4	GIMAP8	1	-0.0411017683005712
ADCY4	GPR56	1	-0.0237482433483445
ADCY4	HID1	1	-0.0667062266966606
ADCY4	ICAM2	1	-0.0157450616775046
ADCY4	IFI27	1	-0.0340919296808871
ADCY4	JAG2	1	-0.0431792835119233
ADCY4	LCN10	1	-0.0306982087468513
ADCY4	NOSTRIN	1	-0.117937400843172
ADCY4	NPDC1	1	-0.0191508998047115
ADCY4	PDE2A	1	-0.00120222169325154
ADCY4	PKN3	1	-0.0186963622883436
ADCY4	PLVAP	1	-0.0209538483339356
ADCY4	RAMP3	1	-0.0962401030464783
ADCY4	RASIP1	1	-0.00126060342083039
ADCY4	RIPK3	1	-0.0636695011678471
ADCY4	ROBO4	1	-0.0677335374282596
ADCY4	SH2D3C	1	-0.0647553246560604
ADCY4	SHANK3	1	-0.15716978380240698
ADCY4	SLCO2A1	1	-0.162787437257236
ADCY4	SOX18	1	-0.0507799012300434
ADCY4	SPNS2	1	-0.0367898573792142
ADCY4	TMEM255B	1	-0.022965325654302003
ADCY4	TPO	1	-0.0310534055959818
ADCY4	TSPAN7	1	-0.0284682651834103
ADCY5	CAMK2G	1	-0.0152588787202076
ADCY5	MKS1	1	0.00612239709079149
ADCY5	PGF	1	-0.000373815782258608
ADCY5	RAB20	1	-0.0086995566066456
ADCY5	RASL12	1	-0.0724900637113363
ADCY9	CMIP	1	-0.0107875497324918
ADCY9	HECTD2	1	0.0186025530044044
ADCY9	MAML3	1	-0.0501356777779038
ADCY9	MLLT1	1	-0.00642409647068055
ADCY9	MPP3	1	0.0406810582020957
ADCY9	NFIX	1	-0.0486312778385696
ADCY9	PRDM16	1	-0.0603240786056011
ADCY9	RNF150	1	-0.00608823352146629
ADCY9	WDTC1	1	-0.0128213603980684
ADCYAP1	CPA3	1	-0.0768149921551156
ADCYAP1	HDC	1	-0.0403283173717084
ADD1	DCTN1	1	-0.0756087500591957
ADD1	DYNC1H1	1	-0.0544818569514446
ADD1	FLNA	1	-0.00748963195391657
ADD1	NFIB	1	-0.0501616619855592
ADD1	TLN1	1	-0.140675594763736
ADD1	UGP2	1	-0.00445570270490889
ADD3	AOX1	1	-0.0039627514011472895
ADD3	ASAP3	1	-0.007190565812181509
ADD3	CD248	1	-0.0458413635810538
ADD3	MGST1	1	-0.0591860306092669
ADD3	SCARA5	1	-0.0445807583910078
ADD3	SLPI	1	-0.00783398482319311
ADD3	VIT	1	-0.101984695361908
ADIRF	CCDC81	1	0.0207289099002491
ADIRF	CDK18	1	-0.0777179786790496
ADIRF	NOTCH3	1	-0.0079058262451208
ADIRF	RBPMS2	1	-0.00433653388560663
ADIRF	RGS5	1	-0.00431063121986429
ADIRF	SNCG	1	-0.296651778724947
ADIRF	STK36	1	0.0179541483684932
ADM	BHLHE40	1	-0.00870042233083488
ADM	BHLHE41	1	-0.0048449732984095105
ADM	EGLN3	1	-0.0799323087183737
ADM	ENO2	1	-0.0448851521334141
ADM	MRPS6	1	-0.00166270508819605
ADM	MTFP1	1	-0.0121943719617511
ADM	PPP1R3G	1	-0.00566397549419785
ADM	SHMT2	1	-0.0176235182492136
ADM	SLC2A1	1	-0.131639690088944
ADM	ZNF395	1	-0.11038449169901
ADM5	DARC	1	-0.0915790067257741
ADM5	FAM110D	1	-0.118474950606921
ADM5	FAM162B	1	-0.0538603801013949
ADM5	SNTG2	1	-0.0171744601230868
ADM5	TACR1	1	-0.011254370606708001
ADM5	TESC	1	-0.126966153186134
ADM5	TLL1	1	-0.0455820203123699
ADORA2A	CDK6	1	-0.0184305515524787
ADORA2A	COL13A1	1	-0.0017153705979030401
ADORA3	C1QB	1	-0.0162117050311755
ADORA3	C1QC	1	-0.0100929325769528
ADORA3	C1orf162	1	-0.079423719991672
ADORA3	CD163	1	-0.07337032675411999
ADORA3	FERMT3	1	-0.01901218062516
ADORA3	GPR34	1	-0.0099325183904919
ADORA3	LCP2	1	-0.00218923604591238
ADORA3	NCF4	1	-0.0308871551036441
ADORA3	NID1	1	-0.0020688224147027
ADORA3	PIK3R5	1	-0.0231446136278248
ADORA3	RNASE1	1	-0.022312527865096
ADORA3	RNASE6	1	-0.0492263371145404
ADORA3	SLA	1	-0.0120009447392621
ADORA3	SLC1A3	1	-0.0437513532006395
ADORA3	SLCO2B1	1	-0.0428653920757681
ADORA3	VSIG4	1	-0.0480072269699891
ADRA1B	IRF2BP2	1	-0.0194906732316043
ADRA1B	KLF15	1	-0.0102612456359909
ADRA1D	HOXA11	1	-0.15580461294007097
ADRA1D	HOXA13	1	-0.0930125509730436
ADRA1D	MCF2L	1	-0.0068028021199117
ADRA1D	TOX2	1	-0.206577408548376
ADRA2B	ALDOA	1	-0.0734676807807758
ADRA2B	APLN	1	-0.00351583594673618
ADRA2B	CHD1L	1	-0.0664842522492412
ADRA2B	EGLN3	1	-0.15999269437215802
ADRA2B	KCNH2	1	-0.0383550364040601
ADRA2B	KCTD16	1	-0.0282584688902065
ADRA2B	KSR1	1	0.017590437468405
ADRA2B	MCHR1	1	-0.0264581848520132
ADRA2B	PPFIA4	1	-0.0325736975486836
ADRA2B	PRKAA2	1	-0.0159318304855083
ADRA2B	VEGFA	1	-0.10617130348793499
ADRB2	BMX	1	-0.0311801689321708
ADRB2	CDH23	1	-0.00814184180865732
ADRB2	DKK2	1	-0.046783554228405
ADRB2	GRASP	1	-0.0984089210720566
ADRB2	KCTD12	1	-0.0313655657983286
ADRB2	KIF26A	1	-0.0464411331151687
ADRB2	MECOM	1	-0.0284237246626151
ADRB2	PTPRB	1	-0.0785282047191066
ADRB2	SDPR	1	-0.00453527336151284
ADRBK1	ANKRD13D	1	-0.0279846472227056
ADRBK1	ARHGEF17	1	-0.052853688764284
ADRBK1	ARRDC4	1	-0.00522792948035383
ADRBK1	CDKN2D	1	-0.0341897278009822
ADRBK1	FIBIN	1	0.0077059474320976705
ADRBK1	FURIN	1	-0.0166708686714908
ADRBK1	GLIS2	1	-0.0712175298637725
ADRBK1	INPPL1	1	-0.0206911479287039
ADRBK1	LMO4	1	-0.0293552504034079
ADRBK1	LZTS2	1	-0.027690016905907
ADRBK1	MKS1	1	0.0258947913135462
ADRBK1	MTSS1L	1	-0.0618679731650752
ADRBK1	NCS1	1	-0.0553042981064138
ADRBK1	NOTCH1	1	-0.029953969698008003
ADRBK1	PDLIM2	1	-0.0543571642135961
ADRBK1	SOX12	1	-0.042395625019874005
ADRBK1	SYDE1	1	-0.0395724026763444
ADRBK1	TCF3	1	-0.08002670305986999
ADRBK1	TMEM141	1	0.0171027883161812
ADRBK1	TRABD	1	-0.0341214530822021
ADRBK1	ZBTB7B	1	-0.0441953701917332
ADRBK1	ZMAT1	1	0.0191221149059735
ADRBK1	ZNF219	1	-0.0665387910285027
ADRBK1	ZNF664	1	-0.00869640710786749
ADRM1	ANXA6	1	0.0618724240748552
ADRM1	C6orf226	1	-0.0120234631527602
ADRM1	CSNK1G2	1	-0.0258728702268415
ADRM1	DCTN1	1	0.0027347945197369102
ADRM1	ECI1	1	-0.0678234712190115
ADRM1	GLTPD1	1	-0.12732575747395
ADRM1	GPX4	1	-0.0262841565561392
ADRM1	GYS1	1	0.013299444132466002
ADRM1	HMGB2	1	0.0161816543762455
ADRM1	KPNA1	1	-0.0111276276910923
ADRM1	LIN7B	1	-0.010182968647513
ADRM1	MGEA5	1	0.0282540142135326
ADRM1	NDUFB10	1	-0.00510663015865919
ADRM1	NEK7	1	-0.0196946186356587
ADRM1	NME3	1	-0.0585481908420854
ADRM1	OVGP1	1	-0.00279126490771347
ADRM1	POP7	1	-0.0165997478424097
ADRM1	PUSL1	1	-0.0453342307470768
ADRM1	RPS19BP1	1	-0.0757404684158465
ADRM1	SLC52A2	1	-0.0455566918407555
ADRM1	SRRT	1	-0.0123887650511258
ADRM1	TMEM259	1	-0.0548644400784868
ADRM1	TRABD	1	-0.0519396148884294
ADRM1	TRIM33	1	-0.00362228891364531
ADRM1	UBP1	1	-0.0120080577183627
ADRM1	XPO1	1	0.064300823267002
ADRM1	ZBTB40	1	-0.0369461227979641
ADRM1	ZCCHC14	1	-0.0655783374481777
AEBP1	BGN	1	-0.0428874383111062
AEBP1	FAP	1	-0.0295228457823308
AEBP1	LGALS3BP	1	-0.0235048992262692
AEBP1	LSM4	1	0.0194866002152198
AEBP1	LTBP2	1	-0.041409768048029
AEBP1	LTBP3	1	-0.0624973820251005
AEBP1	MFAP4	1	-0.057443426419016
AEBP1	NCS1	1	0.0156543095703101
AEBP1	POLD2	1	0.0319142872771734
AEBP1	PSMA7	1	0.0490627024349718
AEBP1	SFRP4	1	-0.00621351684653182
AEBP1	SULF1	1	-0.0031775555791673698
AEN	FDXR	1	-0.0250187308506183
AFAP1	FOXO4	1	-0.000371432317048718
AFAP1L2	SEPT4	1	-0.0361549795190359
AFAP1L2	SOX10	1	-0.0278853345752997
AFAP1L2	TBX2	1	-0.0169243326882166
AFF2	CERS6	1	-0.0188295260124627
AFF2	CNR1	1	-0.0305899778620601
AFF2	CRLF1	1	-0.00877939808320312
AFF2	EZR	1	-0.00686255632885741
AFF2	MAMLD1	1	-0.025064294303936
AFF2	PRKAG2	1	-0.0146116642783907
AFF2	PTK2B	1	-0.0279882142523191
AFF2	SMCO3	1	-0.0030170018296981397
AFF2	SMG8	1	0.0182673476773351
AFF2	TCEAL1	1	-0.0543967507714506
AFF2	TMEM59L	1	-0.0152346771683613
AFF4	CBR3	1	0.0106143774648825
AFF4	CHD1	1	-0.00252758258882807
AFF4	LATS2	1	-0.0113234618929302
AFF4	NAF1	1	-0.009676903898968591
AFF4	ZNF10	1	-0.0012496450890245
AFF4	ZSWIM6	1	-0.0304290493199913
AGAP2	HIGD1B	1	-0.0780015082909618
AGAP3	PUSL1	1	-0.0035740703125538295
AGAP3	SOCS4	1	-0.0178684254681112
AGAP3	TESK1	1	-0.0391677235816087
AGAP3	TMUB1	1	-0.0579343542983124
AGER	MYLIP	1	0.0270337722955004
AGFG2	PLOD1	1	-0.0465281962227773
AGFG2	TSC22D4	1	-0.0374250475688642
AGL	APH1A	1	0.0652605983119898
AGL	ARHGAP12	1	-0.0622186407440374
AGL	ATP11C	1	-0.0012279508915252698
AGL	CCND1	1	0.009616505407117809
AGL	CENPT	1	-0.0446149504559999
AGL	COMMD3	1	-0.0393263679270344
AGL	ECM2	1	0.0109927054745468
AGL	ENO1	1	-0.000514716054476769
AGL	HSD17B6	1	-0.0212240745937905
AGL	KCNH2	1	-0.0441962804057321
AGL	NIT2	1	-0.0439498970399469
AGL	PDLIM7	1	-0.0378073754889677
AGL	PON2	1	-0.0204307305555144
AGL	PRKAB2	1	-0.0241179043631129
AGL	RAB9B	1	-0.0513475132269158
AGL	RPRD2	1	0.005506541339225571
AGL	SLC1A4	1	0.0146784455287187
AGL	TCEAL1	1	-0.00162964045550181
AGL	TTC37	1	-0.00871725774040893
AGL	VPS13A	1	-0.0579750474521837
AGL	VPS13C	1	-0.0230523956229566
AGL	ZDHHC21	1	-0.0804700939134119
AGL	ZDHHC5	1	0.0501035256788794
AGL	ZNF536	1	-0.0297124442414982
AGO2	ATF7IP	1	-0.0257309050816692
AGO2	SF3A1	1	-0.0354785339944608
AGPAT2	DGAT2	1	-0.00357939259821689
AGRN	C19orf66	1	-0.0169134479407815
AGTR1	CNTFR	1	-0.0010784284004693699
AGTR1	SLC7A2	1	-0.021565180474572
AGTR1	SRPX	1	-0.00881915992807932
AGTRAP	LANCL1	1	-0.0155374467838963
AGTRAP	PHC2	1	-0.0769617711599138
AGTRAP	TIMP1	1	-0.0010589742690852901
AGTRAP	ZNF511	1	0.00393538821830147
AHDC1	ARID1A	1	-0.12842661123982302
AHDC1	BCORL1	1	-0.0704308276470749
AHDC1	GLIS2	1	-0.11622744797220698
AHDC1	GLTPD1	1	-0.0443151405010823
AHDC1	GPRC5C	1	-0.0323532099191652
AHDC1	HOXA3	1	-0.0148471258714613
AHDC1	LZTS2	1	-0.0187016723451961
AHDC1	PGF	1	-0.0198545679113907
AHDC1	PHF23	1	-0.011366310420931999
AHDC1	PRR12	1	-0.0573195107790681
AHDC1	SIX5	1	-0.0695780399741219
AHDC1	TSC22D4	1	-0.0138745401835132
AHDC1	UBTD1	1	-0.0823292707822829
AHDC1	ZBTB7B	1	-0.0821753558090767
AHSA1	HNRNPA2B1	1	-0.0536471637602645
AHSA1	HSPH1	1	-0.11497460620996401
AIF1	ALOX5AP	1	-0.009382700123114441
AIF1	ARHGAP4	1	-0.0114401974791339
AIF1	C1QA	1	-0.12292429312784199
AIF1	C1QB	1	-0.133964339498889
AIF1	C1QC	1	-0.112566440448593
AIF1	CD14	1	-0.0199012398416019
AIF1	CD4	1	-0.0781620103230845
AIF1	CLEC10A	1	-0.00114957082067091
AIF1	CMTM7	1	-0.0128958936460588
AIF1	CYBA	1	-0.0216782797573842
AIF1	CYBB	1	-0.0960682872707107
AIF1	EBI3	1	-0.0166170324340981
AIF1	F13A1	1	-0.0772538356529461
AIF1	GNA15	1	-0.012088554372728
AIF1	GNG2	1	-0.0583256913254317
AIF1	HCK	1	-0.0181377606200526
AIF1	HCST	1	-0.0245706116240782
AIF1	HNMT	1	-0.0617030332382052
AIF1	HPGDS	1	-0.0179950883795907
AIF1	IFI30	1	-0.0356693415929038
AIF1	ITGB2	1	-0.0495430999625113
AIF1	KCNQ1	1	-0.00794706560644442
AIF1	LCP1	1	-0.0559795379244003
AIF1	LST1	1	-0.101130384602779
AIF1	LY86	1	-0.0426955637661428
AIF1	PYCARD	1	-0.0627148429654219
AIF1	SASH3	1	-0.000603120277258617
AIF1	SPI1	1	-0.0202983472092867
AIF1	STAB1	1	-0.0268928122526528
AIF1	TSPAN33	1	-0.0693754276485654
AIF1	TYROBP	1	-0.0711559545271296
AIF1	VAMP8	1	-0.240685717303518
AIF1	VSIG4	1	-0.0161455658570737
AIF1L	COL13A1	1	-0.0416153814383593
AIF1L	CRIP2	1	-0.0136008642362805
AIF1L	KANK3	1	-0.0194518113763916
AIF1L	KAZN	1	-0.0417281786882766
AIF1L	KLHL4	1	0.0272352758452986
AIF1L	MRAP2	1	-0.103003209600238
AIF1L	MYRIP	1	-0.0749829813713532
AIF1L	RASSF3	1	-0.0643641814919303
AIF1L	RBPMS2	1	-0.17394259493347902
AIF1L	SLC7A4	1	0.0222364553750987
AIF1L	SLC9A3R1	1	-0.0325342243867653
AIF1L	SOBP	1	-0.0488980941126054
AIF1L	SORBS2	1	-0.0291232683980724
AIF1L	TMEM158	1	0.0019308224719921199
AIF1L	TRPC4	1	0.0576560097033448
AIF1L	ZNF536	1	0.0563656879205672
AIP	ANKH	1	-0.0218158466711614
AIP	CCDC59	1	-0.0512027273191306
AIP	COMMD3	1	0.0343747213697956
AIP	CTSF	1	-0.050611847936847
AIP	EIF3G	1	-0.0578860285639116
AIP	HEXIM2	1	-0.00672988855035219
AIP	PRKAG2	1	0.0639401998762052
AIP	RPRD2	1	-0.0629431634150726
AJUBA	AMOTL2	1	-0.10263020054212801
AJUBA	FGF13	1	-0.0129683251972129
AJUBA	KAZN	1	-0.0355793500085694
AJUBA	NPR3	1	-0.0757905334735749
AJUBA	PDLIM2	1	-0.0438875339654102
AK5	MAP2	1	-0.0260671015154343
AK5	PRUNE2	1	0.000521636686268485
AK5	RGS6	1	-0.0690005584558045
AKAP1	FAM20C	1	-0.055751531844485
AKAP1	MBNL2	1	0.00567463484266319
AKAP1	MEF2C	1	-0.0130608721456366
AKAP1	MYO1D	1	-0.0114519767964288
AKAP1	PHACTR1	1	-0.0155439302580717
AKAP1	SH3D19	1	0.00465951729800506
AKAP1	TEAD1	1	0.11718006173828399
AKAP12	AVPI1	1	-0.00564831839037755
AKAP12	FN3K	1	-0.0620145403866927
AKAP12	METRNL	1	-0.0266213294157555
AKAP12	NR4A3	1	-0.0621907266614833
AKAP12	PDE4D	1	-0.0856601947821561
AKAP12	PGM2	1	-0.0165760110732548
AKAP12	SIK1	1	-0.0463562227853994
AKAP12	SPAG4	1	-0.0144593998831116
AKAP12	TGIF1	1	-0.0137658642689553
AKAP13	DOK4	1	0.0141817167497635
AKAP13	GLIS2	1	0.0286838785474633
AKAP13	PIP4K2C	1	0.0542735723343605
AKAP13	SESN1	1	-0.0337890651046535
AKAP13	SLC7A8	1	-0.0845542423895624
AKAP2	DPYSL3	1	-0.0246969740242374
AKAP2	SYNE2	1	-0.00821499436748876
AKAP2	TNS1	1	-0.0417496295020242
AKAP6	IGF1R	1	-0.038601094878312
AKAP8	AKT1	1	-0.0122834714618464
AKAP8	DHRS3	1	-0.0175997094260352
AKAP8	FUT11	1	-0.0335353647543832
AKAP8	GLS	1	0.00621660185363644
AKAP8	GPER1	1	-0.0298366287612301
AKAP8	MRPS6	1	-0.0253408225426259
AKAP8	PGF	1	-0.13025581817330803
AKAP8	RASL12	1	-0.0160645856251555
AKAP8	RBM14	1	0.0411302155565616
AKAP8	SEMA4B	1	-0.0229418132808767
AKAP8	SLC2A1	1	-0.00659867302419487
AKAP8	SLC39A1	1	-0.00581089631861781
AKAP8	TDP2	1	-0.0377227908558789
AKAP8	ZNF395	1	-0.174663807346614
AKAP8L	BRWD3	1	-0.014310924017167001
AKAP8L	CORO7	1	-0.0253180488366722
AKAP8L	DENND4B	1	-0.0135249756412281
AKAP8L	DPYSL2	1	0.0152046051725161
AKAP8L	FAM76B	1	-0.0227780625729756
AKAP8L	FUBP1	1	-0.06806906940001402
AKAP8L	HOXA9	1	-0.018521676993738998
AKAP8L	MAPK8IP3	1	-0.0005691622001053451
AKAP8L	MAPRE3	1	-0.0588316536976115
AKAP8L	MEPCE	1	0.0327742540080577
AKAP8L	NDUFS6	1	-0.0076755116071884405
AKAP8L	PIDD	1	-0.0123921641575486
AKAP8L	PNISR	1	-0.0312828530016684
AKAP8L	PRPF39	1	-0.0746937701822607
AKAP8L	SLC25A36	1	-0.0254569668909294
AKAP8L	SRSF11	1	-0.0241785561862881
AKAP8L	TMEM259	1	-0.0135626794848755
AKAP8L	TMEM63A	1	-0.0105875097031619
AKAP8L	TRMU	1	-0.00435221990992808
AKAP8L	ZC3H4	1	0.0058538380223761
AKAP8L	ZDHHC5	1	0.0319657841296853
AKAP8L	ZRANB2	1	-0.00941738526069547
AKAP9	ARHGAP12	1	-0.0348364374400685
AKAP9	FAM214A	1	-0.0321221939319152
AKAP9	HIVEP2	1	0.000690771716795494
AKAP9	MLLT1	1	0.0666682525349587
AKAP9	RPRD2	1	0.00794263491511851
AKAP9	SIX5	1	0.000518877231996208
AKT1	B4GALT2	1	-0.0329289263422938
AKT1	BCL2L2	1	-0.0479532458445572
AKT1	BECN1	1	-0.0603823526310088
AKT1	C3orf18	1	-0.0207344556432665
AKT1	C6orf106	1	-0.0986716972917898
AKT1	FAM160A2	1	0.0164960940639285
AKT1	FOXO4	1	-0.00134552736947932
AKT1	GNAS	1	-0.0163818202953017
AKT1	MXI1	1	-0.0874977556127101
AKT1	NCS1	1	-0.0733776459914864
AKT1	RXRA	1	-0.00927419211055598
AKT1	SLC39A1	1	-0.0576492330394866
AKT1	ST3GAL4	1	-0.0343639381510811
AKT1	ST6GALNAC6	1	-0.008654595493610659
AKT1	STK40	1	-0.00282135634380131
AKT1	TAB2	1	-0.11680665106828
AKT1	TNIP1	1	-0.0323101002923176
AKT1	USB1	1	-0.032754134759831
AKT1	WAC	1	-0.0138640428301832
AKT1	ZMAT1	1	0.0172573087076572
AKT3	SCARF2	1	-0.0425288692079643
AL807752.1	FBXL15	1	-0.0270180342814738
ALAS2	GPR97	1	-0.0238198100041585
ALAS2	LCN2	1	-0.0743507179751645
ALAS2	S100A12	1	-0.0903296975442749
ALB	APOA1	1	-0.16352420375874
ALB	APOA2	1	-0.27978659878523604
ALB	APOC3	1	-0.21305112465693302
ALCAM	GRIA1	1	-0.00280742733526014
ALCAM	ITGA10	1	-0.0568766478009523
ALCAM	SATB1	1	0.000497672037852162
ALDH1A1	GPX3	1	-0.00549500796729704
ALDH1A1	NPY1R	1	-0.05403684773912099
ALDH1A1	PID1	1	-0.12113048675063198
ALDH1A1	PLEKHA6	1	-0.0712785236032693
ALDH1A1	SLC9A9	1	-0.00439924404170283
ALDH1A1	ZNF385B	1	-0.00266570796180596
ALDH1A2	TBX1	1	-0.00699064560838583
ALDH1A2	TEK	1	-0.0142109735665595
ALDH1A3	ASPG	1	-0.0110294028653094
ALDH1A3	C14orf180	1	-0.0104906515959896
ALDH1A3	DLX6	1	-0.0576638453459106
ALDH1A3	GPM6A	1	-0.065691375821082
ALDH1A3	GUCY1A2	1	-0.0152637828457198
ALDH1A3	MYRF	1	-0.0493157256762128
ALDH1A3	OPCML	1	-0.185105170651663
ALDH1A3	SLC7A4	1	-0.006542259506687929
ALDH1A3	SPINT1	1	-0.0222876230933286
ALDH1A3	ZNF536	1	-0.120043684785708
ALDH1L1	HOXA11	1	0.0826007209501972
ALDH1L1	KLHDC2	1	0.004439443761581421
ALDH1L1	MEIS1	1	-0.0991722372295762
ALDH1L2	PCOLCE	1	-0.00202663309031077
ALDH1L2	PHF1	1	0.0262700170368286
ALDH1L2	SMARCD2	1	-0.07797817455890801
ALDH2	CALM3	1	-0.0119026772566918
ALDH2	CPQ	1	-0.0151265773018739
ALDH2	PHGDH	1	-0.0993263055879185
ALDH2	RASSF3	1	-0.0311825104156811
ALDH2	RRAS	1	-0.0921508735636126
ALDH2	SELENBP1	1	-0.0577273373142901
ALDH2	SH3BGRL	1	-0.106473874786967
ALDH3A1	BMX	1	-0.062047550360527004
ALDH3A1	C19orf33	1	-0.0537529873408795
ALDH3A1	DKK2	1	-0.134059816865601
ALDH3A1	F5	1	-0.049481131070705
ALDH3A1	HEG1	1	-0.000909323506447316
ALDH3A2	EPAS1	1	-0.0185864481311597
ALDH3A2	MAPK4	1	-0.0160670848151233
ALDH3A2	MYO1E	1	0.0606320664395013
ALDH3A2	PDE4D	1	-0.00534988572512846
ALDH3A2	TBX18	1	-0.0300857647402954
ALDH4A1	CETN2	1	-0.0479001228503076
ALDH4A1	COL5A3	1	-0.0127367965806062
ALDH4A1	EIF3G	1	0.0191177166310434
ALDH4A1	MAOA	1	-0.0159679301041573
ALDH4A1	MSRB1	1	-0.0279318282512218
ALDH4A1	MYO10	1	-0.0490405034028024
ALDH4A1	NKD1	1	-0.0783832918543483
ALDH4A1	PCYT2	1	-0.00103661800011961
ALDH4A1	RASGRP2	1	-0.0467678481773277
ALDH4A1	RRAS	1	-0.0006256976176036309
ALDH4A1	SALL2	1	0.0151908123093046
ALDH4A1	SCOC	1	-0.0434306864028569
ALDH4A1	SF3A2	1	0.0451772071217116
ALDH4A1	SMARCD3	1	-0.0149404888466955
ALDH4A1	STS	1	-0.0076123425601259
ALDH4A1	TGFB1	1	0.00104268113067374
ALDH4A1	TGM2	1	-0.0513048737937686
ALDH4A1	UBXN1	1	0.0753905042771676
ALDH4A1	VCL	1	-0.0719442596672696
ALDH4A1	ZNF148	1	0.0009456049029320961
ALDOA	APLN	1	-0.13766213132305402
ALDOA	CDK18	1	-0.0392372098604219
ALDOA	CHD1L	1	-0.0689564232402599
ALDOA	CKMT2	1	-0.20798454686433
ALDOA	DARS	1	-0.107721006073003
ALDOA	DYRK2	1	-0.0215668245442928
ALDOA	EGLN3	1	-0.0521003253172566
ALDOA	ENO1	1	-0.125209433298193
ALDOA	GBE1	1	-0.0355974344122472
ALDOA	KCTD16	1	-0.037342394884664
ALDOA	MPP2	1	-0.0185341810481231
ALDOA	NDUFA4L2	1	-0.11237799821538498
ALDOA	PDE8A	1	-0.00343370498516857
ALDOA	PFKL	1	-0.15796543503864402
ALDOA	PFKP	1	-0.0581382256610136
ALDOA	PLOD2	1	-0.0058097984253102
ALDOA	PPFIA4	1	-0.0440294118304409
ALDOA	PPP1R3G	1	-0.0471870038026129
ALDOA	PRKAB2	1	-0.0171913625756726
ALDOA	SHMT2	1	-0.0293852485372351
ALDOA	VEGFA	1	-0.19086502574478398
ALG3	DPM2	1	-0.0374317692620104
ALG3	IARS	1	-0.0432010832805987
ALG3	TMEM214	1	-0.0220915539975855
ALG6	ARHGAP12	1	-0.0431937712809009
ALG6	COMMD3	1	-0.00439082625010275
ALG6	HLA-DPB1	1	0.019558702774689997
ALG6	TYK2	1	-0.007072234601229791
ALOX15B	PTK2B	1	-0.0456761157667019
ALOX15B	SLA	1	-0.11454649646527801
ALOX15B	SLC1A3	1	-0.0456808815110212
ALOX5	BTK	1	-0.0399993504071677
ALOX5	CACNA2D4	1	-0.0768742251838251
ALOX5	CD53	1	-0.037368940284261
ALOX5	CSF3R	1	-0.0480399345018217
ALOX5	FBP1	1	-0.0110936430430445
ALOX5	FGR	1	-0.00866192240494795
ALOX5	FMNL1	1	-0.115463576003466
ALOX5	IL10RA	1	-0.0437035822833801
ALOX5	IRF5	1	-0.0240298391731274
ALOX5	ITGAM	1	-0.0652844090897879
ALOX5	ITGB2	1	-0.00291848207298195
ALOX5	KCNAB2	1	-0.0541945509176195
ALOX5	LAPTM5	1	-0.05573110171742201
ALOX5	MSR1	1	-0.00064428619482787
ALOX5	MYO1F	1	-0.0803224395938536
ALOX5	MYO1G	1	-0.0659076906301648
ALOX5	NCF4	1	-0.0452604482346319
ALOX5	PARVG	1	-0.0569603240208459
ALOX5	PIK3R5	1	-0.10045503547761699
ALOX5	PLCB2	1	-0.0373905627252617
ALOX5	PSTPIP1	1	-0.0183689304589796
ALOX5	PTPN6	1	-9.6212810978269e-06
ALOX5	SASH3	1	-0.0273399536807977
ALOX5	STXBP2	1	-0.0760929156062049
ALOX5	TFEC	1	-0.0474863272785223
ALOX5	THEMIS2	1	-0.058397101443666
ALOX5	TYROBP	1	-0.0288172459458589
ALOX5	WAS	1	-0.0722904068356313
ALOX5AP	C1QA	1	-0.013345705309389
ALOX5AP	C1QB	1	-0.0481558732562906
ALOX5AP	C1QC	1	-0.045719161212929
ALOX5AP	C1orf162	1	-0.164903097697969
ALOX5AP	C3AR1	1	-0.0559136737877988
ALOX5AP	CACNA2D4	1	-0.0483318881846595
ALOX5AP	CD163	1	-0.0874988179900304
ALOX5AP	CD53	1	-0.1839876936395
ALOX5AP	CLEC5A	1	-0.0789389320253692
ALOX5AP	CMTM7	1	-0.00162054392862538
ALOX5AP	CYBA	1	-0.0595720660359544
ALOX5AP	DEPTOR	1	-0.0139564167897807
ALOX5AP	EBI3	1	-0.00954040469210786
ALOX5AP	FBP1	1	-0.00350430334414148
ALOX5AP	FERMT3	1	-0.0749150822809752
ALOX5AP	GPR84	1	-0.047091082261540004
ALOX5AP	IGSF21	1	-0.0488746669784011
ALOX5AP	ITGAM	1	-0.00587171870868612
ALOX5AP	ITGB2	1	-0.0943441932699585
ALOX5AP	LAPTM5	1	-0.0714025353018808
ALOX5AP	LCP1	1	-0.0790872395127486
ALOX5AP	RAC2	1	-0.00812654657922524
ALOX5AP	RGS1	1	-0.0309384027073831
ALOX5AP	RNASE6	1	-0.006088309667896179
ALOX5AP	SASH3	1	-0.0404113869554108
ALOX5AP	SLA	1	-0.0370308048720268
ALOX5AP	TBXAS1	1	-0.0525805655289046
ALOX5AP	TREM2	1	-0.033433448445887005
ALOX5AP	TYROBP	1	-0.0188133726842227
ALOX5AP	VAMP8	1	-0.115802418321291
ALOX5AP	VSIG4	1	-0.062373035916309
ALPK3	C11orf24	1	-0.0017796590424635102
ALPK3	CABIN1	1	0.00304435324718635
ALPK3	HSPB7	1	-0.00300943818799225
ALPK3	KCNMA1	1	-0.0189930124134611
ALPK3	MEF2A	1	-0.0038278437251266896
ALPK3	RASGRP2	1	0.0331732174206336
ALPK3	SLC20A2	1	-0.0447020165009913
ALPL	EMCN	1	-0.0110623272806934
ALPL	FCN3	1	-0.220221262835649
ALPL	SLCO2A1	1	-0.0678742195605711
ALPL	TMEM88	1	-0.0381481266244333
AMFR	APH1A	1	-0.0795569043946464
AMFR	C6orf106	1	-0.0543894834809234
AMFR	CYTH3	1	-0.018996896657728
AMFR	DMTF1	1	0.0131793455001827
AMFR	DTNBP1	1	-0.0635030445931861
AMFR	ERI2	1	0.0209226625259327
AMFR	KHSRP	1	-0.0788694204201776
AMFR	KIRREL	1	-0.00453569716891827
AMFR	LITAF	1	-0.0405125186667293
AMFR	MAF1	1	-0.0169161995517728
AMFR	MEPCE	1	-0.0531314046713586
AMFR	SLC25A36	1	0.00320984078168298
AMFR	SLC39A1	1	-0.0365673414667813
AMFR	ST6GALNAC6	1	-3.70873904591007e-05
AMFR	TAB2	1	-0.00201483731594765
AMICA1	AOAH	1	-0.0903756309265567
AMICA1	ARHGAP9	1	-0.00339948162098436
AMICA1	CD37	1	-0.0469537528846113
AMICA1	CD48	1	-0.0424435526977142
AMICA1	CD52	1	-0.0242123199813686
AMICA1	CLEC10A	1	-0.162764029456092
AMICA1	CPVL	1	-0.0170012453794975
AMICA1	CSF1R	1	-0.000733581769350233
AMICA1	CXCR4	1	-0.033078916389466
AMICA1	DEF6	1	-0.0415613137838547
AMICA1	FCN1	1	-0.009427342667089809
AMICA1	FGD3	1	-0.0608212651883421
AMICA1	HLA-DMB	1	-0.0591661443691252
AMICA1	IKZF1	1	-0.00865960161015453
AMICA1	MYO1F	1	-0.0146694205237471
AMICA1	MYO1G	1	-0.0272524489742585
AMICA1	PLCB2	1	-0.0578419512508478
AMICA1	PTPRC	1	-0.114010938536479
AMICA1	RPS6KA1	1	-0.0873540524093211
AMICA1	SELPLG	1	-0.0276214621470314
AMICA1	TAGAP	1	-0.00809109640901235
AMIGO1	SOBP	1	-0.00436994636390458
AMIGO1	TMEM141	1	0.0179646197786629
AMIGO2	DNAJB4	1	-0.0310136954426228
AMIGO2	FAM129B	1	0.0483011687499469
AMIGO2	FBXO16	1	-0.0252066025899689
AMIGO2	FHL5	1	-0.0427573389266402
AMIGO2	GAREM	1	-0.0141220342112782
AMIGO2	HSPB8	1	-0.0201389670097427
AMIGO2	KLHL38	1	-0.0170680461088099
AMIGO2	NAF1	1	-0.0102147451502654
AMIGO2	TRIM36	1	-0.00105239202508481
AMIGO2	ZFHX3	1	-0.00614524938479905
AMIGO2	ZKSCAN8	1	0.0047800121092874395
AMOTL1	ARNT2	1	-0.0330443549555162
AMOTL1	CDC42EP4	1	-8.35491544050049e-05
AMOTL1	CYTH3	1	-0.0365505616291011
AMOTL1	ENTPD6	1	0.0982763061580713
AMOTL1	ERG	1	-0.0186890158793965
AMOTL1	ETV7	1	-0.00473543174491232
AMOTL1	EXTL3	1	-0.00852553848655436
AMOTL1	KIRREL	1	-0.0416195669128928
AMOTL1	LRCH1	1	-0.0122616332183146
AMOTL1	LUZP1	1	-0.0266536945852817
AMOTL1	MAML3	1	-0.0461776511361357
AMOTL1	MEF2C	1	-0.044057141786587005
AMOTL1	MFHAS1	1	-0.0264780144436339
AMOTL1	PRDM16	1	-0.0195738114937356
AMOTL1	PRRC2B	1	-0.00156164827868037
AMOTL1	RNF150	1	-0.11725058917732001
AMOTL1	RPRD2	1	-0.0104566811785512
AMOTL1	SLCO5A1	1	-0.0109226730468879
AMOTL1	TMEM173	1	-0.00778001636623528
AMOTL1	TSPAN9	1	-0.0941409603459719
AMOTL2	GPR176	1	-0.0757295160888902
AMOTL2	HDAC7	1	-0.0164848487525458
AMPD2	HEXIM1	1	-0.007442821915809459
AMPD2	KIAA1147	1	-0.00175127925391013
AMPD2	PARVA	1	0.0103043531615275
AMPD2	PELI3	1	-0.0502161808834284
AMPD2	SALL2	1	-0.0344857978397549
AMPD2	VAMP4	1	-0.0920668951011822
AMPD3	DOCK2	1	-0.0075204038922421
AMPD3	HCK	1	-0.010430864054156
AMPD3	ITGAM	1	-0.00329347180447605
AMPD3	ITGB2	1	-0.025948759400403996
AMPD3	PLCB2	1	-0.0666302416499613
AMPD3	RPS6KA1	1	-0.00286735947059731
ANAPC11	BAD	1	-0.0379415243988852
ANAPC11	C1orf122	1	-0.057298270024162996
ANAPC11	COX8A	1	-0.00976053374239577
ANAPC11	DYNLRB1	1	-0.0038584993111292
ANAPC11	LSM7	1	-0.0399951148571277
ANAPC11	MYEOV2	1	-0.130460285157931
ANAPC11	NDUFB7	1	-0.182198805978118
ANAPC11	RABAC1	1	-0.0461152494024779
ANAPC11	ROMO1	1	-0.0181513802993468
ANAPC11	RPS19BP1	1	-0.0591577492724381
ANAPC11	TSPO	1	-0.0931792097593172
ANAPC11	TSR3	1	-0.0492726923892275
ANAPC11	ZNF219	1	-0.0242027684211268
ANAPC2	PRKACA	1	0.0113949687694933
ANAPC2	RHOT2	1	-0.0551401500192084
ANAPC2	TAF1C	1	-0.00158064517624912
ANAPC2	TUBGCP6	1	-0.0149022916533627
ANAPC5	FMNL2	1	-0.0863032192863799
ANAPC5	LUC7L	1	-0.0357924973278677
ANAPC5	NAA10	1	-0.0663378846265987
ANAPC5	RPRD2	1	0.0682596190277944
ANAPC5	SLAIN1	1	0.006765688787742911
ANAPC5	SLC26A10	1	-0.0218674306257692
ANAPC5	STK36	1	-0.0961101239485687
ANAPC5	TYK2	1	-0.0202060862284174
ANAPC5	WDR34	1	-0.0300222744416981
ANAPC5	WDR52	1	-0.0274047720106752
ANAPC5	ZBTB4	1	0.0269721945817655
ANAPC7	C17orf70	1	-0.0288841784904508
ANAPC7	MARS	1	-0.00128829224234625
ANAPC7	NOC3L	1	-0.000213341542834618
ANAPC7	PHF21A	1	0.008969507353369821
ANAPC7	SLC27A4	1	-0.0518730444602341
ANG	GLIS3	1	-0.00927594422181861
ANG	GPX3	1	-0.0387391285206648
ANG	NDRG1	1	-0.0152196975053567
ANG	SDC2	1	-0.0631288920891745
ANG	SERPING1	1	-0.0304571144305695
ANG	TMBIM1	1	-0.0551211196571204
ANGEL1	NEK9	1	-0.06739228112687501
ANGEL1	OVGP1	1	0.00237434641289227
ANGEL1	TCF7L1	1	0.0320907929098042
ANGEL1	VCL	1	-0.0614167569538533
ANGPT1	ANGPT4	1	-0.146774132107039
ANGPT1	ARHGEF9	1	0.0288704570115373
ANGPT1	CTTN	1	0.0348767436909192
ANGPT1	EBF1	1	-0.0833803087283589
ANGPT1	EGFLAM	1	-0.0484739734849604
ANGPT1	EPAS1	1	-0.00589270768385375
ANGPT1	GMDS	1	-0.0127611463506368
ANGPT1	MAGI2	1	-0.0842343534875806
ANGPT1	MAN1A1	1	-0.0162064277907565
ANGPT1	MYRIP	1	-0.0104826805389251
ANGPT1	NTRK2	1	-0.0202001561610448
ANGPT1	PLCL1	1	-0.0971156281732969
ANGPT1	RAC2	1	-0.0126868835720121
ANGPT1	RANBP3L	1	-0.0614854392370086
ANGPT1	RASGRP2	1	-0.0779162701898618
ANGPT1	SELENBP1	1	-0.072625836308
ANGPT1	SESN3	1	-0.025640098526535003
ANGPT1	SH3BGRL	1	-0.005912719195107229
ANGPT1	SORBS2	1	-0.0384302691071117
ANGPT1	SRGN	1	-0.0143041660940363
ANGPT1	TRNP1	1	-0.00269885523695244
ANGPT1	YPEL5	1	-0.0059965355766882205
ANGPT1	ZCCHC5	1	0.0060449826179136
ANGPT4	FRZB	1	-0.00209946298173235
ANGPT4	GPC4	1	-0.0076087149679573
ANGPT4	LINGO1	1	-0.0608901449638964
ANGPT4	PALD1	1	-0.009314908961988059
ANGPT4	TBX2	1	-0.00204405687111495
ANGPT4	TMEM61	1	0.0134236273374677
ANGPT4	TMTC1	1	-0.06294526739950401
ANGPT4	TRNP1	1	-0.00984674440969239
ANGPT4	ZBTB7C	1	-0.073493142677272
ANGPTL1	ANO6	1	0.0124263007865986
ANGPTL1	ARHGAP6	1	-0.0204398809195919
ANGPTL1	BMP1	1	-0.0708628714223248
ANGPTL1	BRSK2	1	-0.0556494871392545
ANGPTL1	CLASP2	1	0.00047742305811884403
ANGPTL1	COPRS	1	0.012143406686655001
ANGPTL1	DCLK1	1	-0.0350527107715174
ANGPTL1	FAM166B	1	-0.036982105868751995
ANGPTL1	FAM198A	1	-0.0814667459135015
ANGPTL1	GLUL	1	-0.0250275126317046
ANGPTL1	GPC1	1	-0.00154343659329479
ANGPTL1	HPD	1	-0.00253174236413173
ANGPTL1	MAOA	1	-0.027994152116078
ANGPTL1	PPAP2A	1	-0.0269758210865174
ANGPTL1	RASSF4	1	-0.0152793069989656
ANGPTL1	RILPL2	1	0.0116453733121264
ANGPTL1	TAGLN	1	-0.069824573064606
ANGPTL1	TP53I3	1	-0.00707532759850362
ANGPTL2	CERS6	1	0.0528914761525369
ANGPTL2	LOXL4	1	-0.000978631210916152
ANGPTL2	MXRA8	1	-0.00729618518519353
ANGPTL2	SLC7A2	1	0.0916504030376077
ANGPTL2	VWA5A	1	-0.0159097078565317
ANGPTL5	COLGALT2	1	-0.0210396345674365
ANGPTL5	DCN	1	-0.13607575069675998
ANK2	SCPEP1	1	-0.0375522680400897
ANKH	ARHGAP12	1	0.0289462848432846
ANKH	CBLL1	1	-0.0554521133899751
ANKH	CCDC47	1	-0.0142353262478464
ANKH	FAM168B	1	-0.00541456834775957
ANKH	HGF	1	-0.00851841675760898
ANKH	NBL1	1	-0.07161132290340598
ANKH	PKDCC	1	0.0226004963642786
ANKH	RPRD2	1	-0.14302255198725303
ANKH	SCARA3	1	-0.0034993809359771103
ANKH	TNFSF12	1	-0.0010799958982162401
ANKH	ZFC3H1	1	0.00339010636908469
ANKHD1	XPC	1	-0.008525357864049591
ANKMY2	GUCY1B3	1	-0.0118164536427991
ANKMY2	PIP4K2C	1	-0.0245934759990663
ANKRD1	NEXN	1	-0.0162574831003422
ANKRD10	TANC1	1	-0.0323906812142698
ANKRD13A	CLN5	1	-0.00139190176325857
ANKRD13A	COL4A2	1	-0.0687843871446042
ANKRD13A	CTIF	1	-0.0441357837101678
ANKRD13A	DUSP15	1	-0.0920615347514999
ANKRD13A	HMGB2	1	-0.0102746614035029
ANKRD13A	MGEA5	1	-0.016770255435705
ANKRD13A	ORAI3	1	-0.0109955968732633
ANKRD13A	PRKAB2	1	-0.0398166000173441
ANKRD13A	REV3L	1	-0.00077491514634574
ANKRD13A	SLC2A4RG	1	-0.00845670731895172
ANKRD13A	TPM2	1	-0.0172227287104321
ANKRD13D	SF3A1	1	0.032825598231694
ANKRD2	ETNK2	1	-0.0254140900628224
ANKRD2	GMPR	1	-0.0569920165226395
ANKRD2	LRRC16A	1	-0.0332274419660933
ANKRD2	MYO10	1	-0.00578353674649433
ANKRD2	PPP1CB	1	-0.00676264513172619
ANKRD2	TACC1	1	-0.0153042432629778
ANKRD28	BTD	1	-0.0148918908945705
ANKRD28	GLUL	1	-0.0413017132491455
ANKRD28	MAP2K6	1	-0.00307170140126592
ANKRD28	PRDM8	1	-0.015363973663088002
ANKRD28	PRICKLE2	1	-0.0249528284166761
ANKRD28	SESN1	1	-0.0215954202321269
ANKRD28	SFRP2	1	-0.00563205538098754
ANKRD29	DLX6	1	-0.0114855964772467
ANKRD29	LAMA3	1	-0.0518348374142629
ANKRD29	LPPR4	1	-0.0159812897577991
ANKRD29	NFIX	1	0.0121117841371684
ANKRD29	PARM1	1	-0.0609537871510877
ANKRD29	PTGDR	1	-0.000168335279971232
ANKRD29	RAPGEF3	1	-0.0691843497203572
ANKRD29	ZDHHC21	1	-0.0398983649304683
ANKRD34C	MAPRE2	1	-0.0394723087178077
ANKRD37	AVPI1	1	-0.144901014503144
ANKRD37	BHLHE40	1	-0.048184406385231
ANKRD37	BHLHE41	1	-0.11590669633519199
ANKRD37	C15orf39	1	-0.13345989810585598
ANKRD37	CDKN1B	1	-0.11988715055069901
ANKRD37	FUT11	1	-0.0818892813990143
ANKRD37	GADD45B	1	-0.0164404041298457
ANKRD37	IMP3	1	-0.13472536322761
ANKRD37	NAB2	1	-0.0745140011207469
ANKRD37	PCK1	1	-0.0868715858446626
ANKRD37	RAB33A	1	-0.0033836347376133198
ANKRD37	RAB3A	1	-0.0433071991177394
ANKRD37	RARA	1	-0.0101447409164978
ANKRD37	RASSF1	1	-0.0354278865838292
ANKRD37	RIPK4	1	-0.0367044698274241
ANKRD37	SLC2A1	1	-0.0721108676271337
ANKRD37	SMAD7	1	-0.0516173262940666
ANKRD37	TUBA4A	1	-0.0473214872959633
ANKRD37	ZCCHC2	1	-0.101310911749354
ANKRD37	ZNF395	1	-0.0826014521916781
ANKRD50	BDNF	1	-0.0160529535074724
ANKRD50	FRMD6	1	-0.0166373142453242
ANKRD9	ENDOG	1	-0.007255656410238709
ANKRD9	EVA1B	1	-0.0213898777568725
ANKRD9	FBXL15	1	-0.0416078336089051
ANKRD9	HES4	1	-0.0881804847081817
ANKRD9	MESDC1	1	-0.01212967780695
ANKRD9	TMEM160	1	-0.153155017282508
ANKRD9	TRAPPC5	1	-0.0292903994560414
ANKRD9	ZBTB7A	1	-0.0139813839319284
ANO1	EHD3	1	-0.0647269001464354
ANO1	HOXA11	1	0.0424030047394243
ANO1	KALRN	1	-0.039211555781515
ANO1	MEF2A	1	-0.0038145695004728397
ANO1	MYRIP	1	0.0109081870548422
ANO1	NES	1	-0.0545622128573898
ANO1	NID1	1	0.0304014824771298
ANO1	PMP22	1	0.0042898251478176
ANO1	RASSF4	1	0.0268257314666798
ANO1	SEMA3C	1	0.00409852466279735
ANO2	PTPRB	1	-0.0272068810779992
ANO6	NFATC4	1	0.00505323166846076
ANO6	PACS1	1	-0.016095224580657
ANO6	SLC26A6	1	0.0515822566799409
ANO6	TOP1MT	1	-0.0188258778727378
ANO8	SLC6A9	1	-0.0171975741946794
ANPEP	KCNS3	1	0.0389138379748525
ANPEP	LAMA2	1	-0.0370101306558139
ANPEP	MAP2K6	1	-0.00185093808343453
ANPEP	NID1	1	-0.0898354467661299
ANPEP	OLFML3	1	-0.0169810729805917
ANPEP	TNFRSF19	1	-0.0042351325624979
ANPEP	VIT	1	-0.00931353958347423
ANTXR1	ERG	1	-0.015953891588862002
ANTXR1	HMCN1	1	-0.0357643710774159
ANTXR1	LTBP1	1	-0.0263905104332884
ANTXR1	MYL6	1	0.0053597786466256705
ANTXR1	MYO1D	1	-0.0190308978022928
ANTXR1	PCDHGB7	1	-0.0304675709767626
ANTXR1	PHB2	1	-0.000250932437379767
ANTXR1	PRKAG2	1	0.0404154937088493
ANTXR1	RGS4	1	-0.0135215464962067
ANTXR1	RPRD2	1	-0.0677689918112842
ANTXR1	SCOC	1	0.0227952849976113
ANTXR1	SYNPO	1	-0.0893408455514599
ANTXR1	TIMP2	1	-0.10496143150942402
ANTXR1	TPM2	1	0.0339332765374074
ANTXR1	VCAN	1	-0.0136958174765685
ANTXR2	PLXDC2	1	-0.0183223968416766
ANTXR2	PRDM8	1	-0.15429827856392903
ANTXR2	SLC44A1	1	-0.0709896400418576
ANXA4	USP31	1	0.00164201268505504
ANXA6	CALD1	1	-0.0855231505772514
ANXA6	FGFRL1	1	0.0248988120082652
ANXA6	FLNA	1	-0.12003288035335301
ANXA6	GLTPD1	1	0.0022847614032890603
ANXA6	HSD17B4	1	-0.0176138107239916
ANXA6	IMP4	1	0.0111265440732315
ANXA6	ITGA7	1	-0.0282602365034258
ANXA6	MICAL1	1	-0.0220108282191615
ANXA6	MYL6	1	-0.0509700003135833
ANXA6	SF3A2	1	0.016023184964414
ANXA6	TLN1	1	-0.0068596858098874105
ANXA6	TMEM259	1	0.00889056568900961
AOAH	CD37	1	-0.0685398092256018
AOAH	CD48	1	-0.0803060203608875
AOAH	CD86	1	-0.0199067241260247
AOAH	CPVL	1	-0.0811765308927458
AOAH	CSF1R	1	-0.045857875386715
AOAH	CXCR4	1	-0.0488932559870753
AOAH	DENND1C	1	-0.0144099864931799
AOAH	FYB	1	-0.0506383671883234
AOAH	HLA-DMB	1	-0.0292660562789532
AOAH	IKZF1	1	-0.00288825172008633
AOAH	ST14	1	-0.0225061849629112
AOAH	TAGAP	1	-0.0349362707411167
AOX1	ARHGAP6	1	-0.046187237179755
AOX1	BANK1	1	-0.14602601888687
AOX1	BCAT1	1	-0.0041412653542588895
AOX1	C1S	1	-0.15600301488896698
AOX1	CHRDL1	1	-0.0724157079302954
AOX1	CYP4B1	1	-0.0978663570916233
AOX1	DCLK1	1	-0.0862901209581856
AOX1	DCN	1	-0.0522125437682528
AOX1	DIO3	1	-0.0307195943649523
AOX1	FYN	1	-0.0772750508155723
AOX1	GAS1	1	-0.0276307628795496
AOX1	GFPT2	1	-0.0230606968345142
AOX1	GPR133	1	-0.11339814109319302
AOX1	GPX3	1	-0.0370067590587801
AOX1	HSD11B1	1	-0.0631021791299164
AOX1	IGF1	1	-0.0454783719888456
AOX1	IL1R1	1	-0.0148663434890347
AOX1	ISM1	1	-0.0271126907156752
AOX1	LAMA2	1	-0.10978684269452
AOX1	LPAR1	1	-0.0006833505078899049
AOX1	LYVE1	1	-0.00894682011964793
AOX1	MAMDC2	1	-0.00570934128641379
AOX1	MGST1	1	-0.129637592246632
AOX1	PCSK5	1	-0.0925031195699104
AOX1	PID1	1	-0.0973491480932856
AOX1	PTK2B	1	-0.0580533205793185
AOX1	PTPRS	1	-0.123571468698666
AOX1	RP11-986E7.7	1	-0.0422447715767306
AOX1	SERPINF2	1	-0.0762191564744202
AOX1	SPOCK1	1	-0.18000544923586
AOX1	SRPX	1	-0.0510391535423255
AOX1	TNFRSF19	1	-0.0038841997498237704
AOX1	USP53	1	-9.07926252120793e-05
AOX1	VIT	1	-0.15209306780413098
AOX1	VSIG4	1	-0.021875397979315
AOX1	XPNPEP2	1	-0.0036663688183177
AP000350.4	GSTT1	1	-0.00299327843583167
AP1S1	FXYD1	1	0.0231500976995285
AP2M1	ATP5B	1	-0.0616932459036284
APBB1	C6orf106	1	-0.0214299137486025
APBB1	DTX3	1	-0.0203083266652304
APBB1	GTF3A	1	-0.00962542349110637
APBB1	HSD17B8	1	0.0446306442253486
APBB1	ILK	1	-0.0567725627086535
APBB1	KCTD17	1	-0.00132969771273435
APBB1	MICAL1	1	-0.0333310342550128
APBB1	NSMCE1	1	0.00804463301440513
APBB1	PREPL	1	0.049640986809495996
APBB1	SPCS1	1	0.0835758255461478
APBB1	TGFB1I1	1	-0.0655614186004899
APBB1IP	CYBB	1	-0.016625674692799
APBB1IP	SASH3	1	-0.0183549082890338
APBB1IP	SPI1	1	-0.0346761878335129
APBB3	ATXN7	1	-0.0787751285525488
APBB3	C9orf72	1	-0.0288860774911754
APBB3	CCNH	1	-0.040079164200668
APBB3	EMD	1	-0.004834532256644371
APBB3	GCNT4	1	-0.00121977939885953
APBB3	GZF1	1	-0.0265472964763982
APBB3	MAD2L2	1	0.0244566628199011
APBB3	MFSD1	1	-0.00583150654886354
APBB3	NRBP2	1	-0.0162154969980547
APBB3	PGM2	1	-0.00966570182175623
APBB3	PPARGC1A	1	-0.0080637145437248
APBB3	PRMT10	1	-0.052167087992087004
APBB3	RNF217	1	-0.00129737503458399
APBB3	SALL2	1	0.005694338927321
APBB3	TMEM218	1	-0.00861830199445477
APBB3	USP36	1	-0.0523463561921848
APBB3	ZNF10	1	-0.0561951324768419
APEX1	ERMAP	1	-0.0361319956347586
APEX1	OXA1L	1	-0.00482636080711535
APEX1	RRAS	1	0.0936799463399804
APH1A	C19orf68	1	-0.000771558860983845
APH1A	CCDC9	1	-0.00644546433363498
APH1A	CLTB	1	0.0351726322980146
APH1A	COX7A2L	1	-0.0357064275412104
APH1A	CRTC2	1	-0.00389582276858137
APH1A	GNL1	1	-0.12000250236308001
APH1A	HNRNPA0	1	-0.096121476382864
APH1A	HNRNPUL2	1	-0.032846840337124004
APH1A	ITGA1	1	0.0116575564127352
APH1A	KDELR1	1	-0.0495716591055996
APH1A	KHSRP	1	-0.105959645337969
APH1A	MEPCE	1	-0.0674394918494871
APH1A	PGRMC2	1	-0.0567684089451588
APH1A	SLC39A1	1	-0.0378189843456613
APH1A	TMED9	1	-0.0773574548656668
APH1A	TRA2B	1	-0.026556935455767997
APH1A	UTP3	1	-0.0146010195236296
APH1A	ZDHHC5	1	-0.0707316562152802
APLN	C8orf22	1	-0.0117958534187236
APLN	CA9	1	-0.0532106442249066
APLN	CDK18	1	-0.0655138175052263
APLN	CHD1L	1	-0.15178788117370098
APLN	CKMT2	1	-0.21225069221460302
APLN	DARS	1	-0.15180555047882902
APLN	EGLN3	1	-0.11253964818364899
APLN	ENO1	1	-0.0757345636972947
APLN	ENO2	1	-0.0214160733497282
APLN	FAM20C	1	-0.0171937006224573
APLN	GBE1	1	-0.0978580784509869
APLN	KCTD16	1	-0.115589522879211
APLN	LOXL2	1	-0.0517959863782713
APLN	LRP5	1	-0.101423310129937
APLN	MRPS6	1	-0.0206454569238918
APLN	NDRG1	1	-0.16066880396013197
APLN	PFKP	1	-0.0846133901116379
APLN	PLOD2	1	-0.10360281200789001
APLN	PPFIA4	1	-0.0813155100334199
APLN	PPP1R3G	1	-0.0212515425949987
APLN	REV3L	1	-0.0356803540509004
APLN	SH3D21	1	-0.0042786434899141105
APLN	SHMT2	1	-0.00919082979763469
APLN	SLC2A1	1	-0.10448453381148402
APLN	TMCO4	1	-0.0230849434762453
APLN	TMEM61	1	-0.0435712847869228
APLN	VEGFA	1	-0.215282683508129
APLN	ZNF395	1	-0.080391174240957
APLNR	AVPR2	1	-0.0133504523671562
APLNR	BCL6B	1	-0.0913857843901924
APLNR	CD163	1	0.016767898100781
APLNR	COX4I2	1	-0.0389186803130896
APLNR	EFCC1	1	-0.00391283606516216
APLNR	EMCN	1	-0.00953457196497639
APLNR	LPPR4	1	-0.00564500992513477
APLNR	LZTS1	1	-0.0539136574684647
APLNR	MGAT3	1	-0.0199627592543198
APLNR	MMP15	1	-0.133573010338355
APLNR	PCDH12	1	-0.143335692963039
APLNR	PLK2	1	-0.0078243920255003
APLNR	SCN4B	1	-0.0863346003246186
APLNR	SH2D3C	1	-0.0202287339678588
APLNR	SMAD1	1	-0.009148087792484029
APLNR	TMEM74B	1	-0.0018704524965167
APOA1	APOA2	1	-0.18351247774982396
APOA1	APOC3	1	-0.35307083103825604
APOA1	KRT13	1	-0.0261755424853812
APOA1	PGC	1	-0.0083386569081772
APOA2	APOC3	1	-0.271163001934168
APOA2	LIPF	1	-0.0183297758415305
APOA2	PGC	1	-0.0610589315629351
APOB	GMDS	1	-0.0138679765628685
APOB	MAOA	1	-0.069193941433614
APOBR	AQP9	1	-0.056061696276229006
APOBR	ARHGAP30	1	-0.073845183571804
APOBR	ARHGAP9	1	-0.0103490865600808
APOBR	DEF6	1	-0.0244143374317464
APOBR	DOK3	1	-0.0554393304713517
APOBR	FGR	1	-0.0245246072416903
APOBR	GPSM3	1	-0.0006202769638551929
APOBR	HCK	1	-0.00355954174810063
APOBR	HK3	1	-0.0208928944193413
APOBR	HMHA1	1	-0.0192338418735693
APOBR	IKZF1	1	-0.0430633400930789
APOBR	IL10RA	1	-0.0084173965624873
APOBR	IRF8	1	-0.0106109876343687
APOBR	KYNU	1	-0.0222756371172862
APOBR	MYO1F	1	-0.105572101145981
APOBR	MYO1G	1	-0.062969906740319
APOBR	NCF2	1	-0.0340833565511102
APOBR	OSM	1	-0.0279549623956198
APOBR	PARVG	1	-0.0283828173653096
APOBR	PIK3R5	1	-0.0518872539489091
APOBR	RGS19	1	-0.0104386266832927
APOBR	RNASET2	1	-0.0678604385843911
APOBR	SELPLG	1	-0.0573550212796881
APOBR	SNX10	1	-0.0177495503194238
APOBR	ST14	1	-0.10363652865470697
APOBR	STXBP2	1	-0.0369163982201142
APOBR	TREM1	1	-0.0497029552826499
APOC3	KRT13	1	-0.0558472839881505
APOC3	LIPF	1	-0.0441113515938905
APOC3	PGC	1	-0.0172028869188665
APOD	CCL13	1	-0.0729157168133433
APOD	CFD	1	-0.0904217900875225
APOD	CHL1	1	-0.0604410970292846
APOD	CXCL14	1	-0.009646202228154759
APOD	DEPTOR	1	-0.0586869976049276
APOD	GPX3	1	-0.102979404521358
APOD	HTRA1	1	0.000138597460234388
APOD	IGF2	1	-0.0230237063013587
APOD	LCP2	1	-0.00367211018449001
APOD	MOXD1	1	-0.0784231815699688
APOD	MYOC	1	-0.028241134008326
APOD	NGF	1	-0.0051512065533911204
APOD	RORB	1	-0.0189628034171317
APOD	TAC1	1	-0.0300525859044992
APOD	VIT	1	-0.0134987999929352
APOLD1	B4GALT1	1	-0.00059450528300449
APOLD1	CCDC107	1	-0.0306829787797216
APOLD1	FOSL2	1	-0.0354655560132265
APOLD1	ITPRIP	1	-0.000103925274304695
APOLD1	KLF9	1	-0.0438188306277585
APOLD1	MSC	1	0.029838509041689002
APOLD1	NR4A3	1	-0.0104934914866786
APOLD1	RASSF1	1	-0.054799969640202
APOLD1	RHOB	1	-0.11662654324978199
APOLD1	SIK1	1	-0.0695368021638016
APOLD1	SLC19A2	1	-0.124729105293351
APOLD1	SPRY2	1	-0.025107404660636
APOLD1	SRGN	1	-0.0376868380374929
APOLD1	TACC1	1	-0.0848549851642471
APOLD1	TIPARP	1	-0.0598709789667971
APP	CSRP1	1	0.0133177364207994
APP	MYOZ1	1	-0.00415848363256163
APP	POLR2A	1	-0.038200250033344
APP	RNPEPL1	1	0.0949738353674757
APP	RPRD2	1	-0.00922392365598612
APP	SELM	1	0.0343401263408526
APP	SF3A1	1	-0.0139371624557199
APP	UTRN	1	-0.0390670734755916
AQP9	CSF3R	1	-0.252708452729395
AQP9	FCN1	1	-0.0387699942938649
AQP9	FGR	1	-0.0370070081948142
AQP9	GPR97	1	-0.0946325469740512
AQP9	HK3	1	-0.0862431882268811
AQP9	MMP25	1	-0.0753599177616808
AQP9	MMP9	1	-0.186663700372453
AQP9	S100A12	1	-0.0911928973015413
AQP9	S100A8	1	-0.0474027455887832
AQP9	S100A9	1	-0.0193595439134569
AQP9	TREM1	1	-0.0230065277881452
AQP9	VNN2	1	-0.162596140679443
AQPEP	MGST1	1	-0.0670848268350546
AQPEP	SCARA5	1	-0.0259790388011099
AR	PPP1R12C	1	0.016051978648868
AR	PTPRG	1	-0.00834498692219435
AR	PTPRS	1	-0.0495070227494186
AR	TNFSF13	1	-0.0551814140780557
ARAP3	CLEC14A	1	-0.0932468615585489
ARAP3	EGFL7	1	-0.00120604084436194
ARAP3	FAM69B	1	-0.0327630940525749
ARAP3	GATA2	1	-0.0200325494029441
ARAP3	NOTCH4	1	-0.00992283228899204
ARF3	C19orf68	1	-0.000284989903422794
ARF3	CALM3	1	-0.120652991453519
ARF3	CBX7	1	-0.0443557180548471
ARF3	CCDC9	1	-0.004790325001663671
ARF3	CDK13	1	0.0361011415505214
ARF3	CENPT	1	0.0434261724129809
ARF3	CRTAP	1	-0.0183323841522868
ARF3	CTSZ	1	-0.0736315412164274
ARF3	DDX39A	1	0.0523592780159993
ARF3	EEF2	1	-0.0140275258615774
ARF3	GBA2	1	0.0369830798129399
ARF3	GNAS	1	-0.0281357086920241
ARF3	GNL1	1	-0.0838758316929506
ARF3	HDAC11	1	-0.0586746794114832
ARF3	HNRNPA0	1	-0.0344766859900406
ARF3	KDELR1	1	-0.018849596243957
ARF3	LITAF	1	-0.0266051652807614
ARF3	MACF1	1	0.044308517752250004
ARF3	MARS	1	0.0654420537393261
ARF3	MTPN	1	-0.005422887312677
ARF3	PARP2	1	0.0290217266206626
ARF3	PDLIM7	1	0.0267711418850695
ARF3	PRPF39	1	0.0388548638255513
ARF3	PSAP	1	-0.0492088740927511
ARF3	PSMA4	1	0.0281811161152361
ARF3	RGP1	1	-0.0775263800465696
ARF3	SLC26A10	1	0.00623239506901419
ARF3	TMEM259	1	0.0414899214203513
ARF3	UBR3	1	0.027559769457477998
ARF3	ZBTB4	1	-0.014577485074012
ARF3	ZFAND1	1	-0.00470817814015397
ARF3	ZRANB2	1	0.00875357664554873
ARF5	SPR	1	0.0459844300085371
ARFGAP1	ATG4B	1	-0.0566927175409708
ARFGAP1	CRTC3	1	0.00300380043321623
ARFGAP1	CXXC1	1	-0.0285830585223604
ARFGAP1	DHX35	1	-0.0049424900135918
ARFGAP1	EIF2B5	1	-0.0153779557325136
ARFGAP1	FAM193B	1	-0.106192439204429
ARFGAP1	KIRREL	1	0.0397390467034285
ARFGAP1	LITAF	1	0.0102438218955288
ARFGAP1	METTL3	1	-0.00530938893100594
ARFGAP1	PAN2	1	-0.0246977076737878
ARFGAP1	PRPF39	1	-0.00904531494674085
ARFGAP1	PTPDC1	1	-0.0009130689638328221
ARFGAP1	RHOT2	1	-0.0624412444528134
ARFGAP1	SLC39A13	1	-0.0124956848439756
ARFGAP1	STK11IP	1	-0.0158725040897122
ARFGAP1	TMEM214	1	-0.019620297230813
ARFGAP1	YIF1A	1	-0.096847934392044
ARFGAP1	ZBTB7C	1	0.00227454384543847
ARFGAP2	ARPC4	1	-0.00859311086626461
ARFGAP2	MRPS34	1	0.0566300293108164
ARFGAP2	PIP4K2C	1	0.0156821451678401
ARFGAP2	SOX12	1	0.0749448460973269
ARFGAP2	SPRYD3	1	-0.0192488443793098
ARFRP1	DBNL	1	-0.0015513919799794
ARGLU1	CREBZF	1	-0.0108783344749832
ARGLU1	CTTN	1	-0.0411846285974768
ARGLU1	DDX17	1	-0.00456126400060314
ARGLU1	LUC7L3	1	-0.174958429647514
ARGLU1	OGT	1	-0.0615256950438231
ARGLU1	PNISR	1	-0.213758898376895
ARGLU1	PRPF39	1	-0.007308445679884209
ARGLU1	SRSF11	1	-0.129081628074005
ARGLU1	TCERG1	1	-0.0429414045376962
ARGLU1	TIA1	1	-0.009562023460077241
ARGLU1	TIAL1	1	-0.000435504777362705
ARHGAP10	CCDC81	1	-0.0368298968791688
ARHGAP10	CLIP2	1	0.0165105094169619
ARHGAP10	DTNA	1	-0.0605518763618424
ARHGAP10	GAB2	1	0.0451440163783771
ARHGAP10	MAD2L2	1	0.0016268823052375
ARHGAP10	MPP3	1	-0.0115200560697996
ARHGAP10	NCOA3	1	-0.0696938012151065
ARHGAP10	NEXN	1	-0.0287573640636107
ARHGAP10	PACSIN2	1	-0.10352375879595699
ARHGAP10	PALLD	1	-0.0392233863607092
ARHGAP10	PCDHGC3	1	0.00535920249506003
ARHGAP10	SCARA3	1	0.0009109279811004051
ARHGAP10	ZCCHC24	1	0.027480812479538
ARHGAP12	BRD4	1	0.0622289803396933
ARHGAP12	CDK12	1	0.0370826146792384
ARHGAP12	CENPT	1	-0.0482686070669538
ARHGAP12	COMMD3	1	-0.0338786430178028
ARHGAP12	CTD-2369P2.12	1	-0.007354313594126159
ARHGAP12	EXOC1	1	-0.0031369406565494896
ARHGAP12	FLII	1	-0.0586079726858896
ARHGAP12	GNRH1	1	-0.0522798224575705
ARHGAP12	MLLT1	1	0.0495990625827656
ARHGAP12	MTPN	1	0.0570199414490645
ARHGAP12	NCOA5	1	0.0270160507075594
ARHGAP12	NR2C1	1	-0.10586517140743303
ARHGAP12	ORMDL1	1	-0.0178843083690644
ARHGAP12	PAPD4	1	-0.008529475594177641
ARHGAP12	PLD3	1	0.0124149966340007
ARHGAP12	POMT1	1	-0.008815940546662921
ARHGAP12	PREB	1	-0.0209370175175867
ARHGAP12	PSMF1	1	0.0242992255939669
ARHGAP12	RAB18	1	0.000411557157938565
ARHGAP12	RASA2	1	-0.05662197630498201
ARHGAP12	RGS5	1	0.0184549352895923
ARHGAP12	RPRD2	1	0.14354520821463598
ARHGAP12	SF3A1	1	0.061676590752908
ARHGAP12	SLC39A13	1	-0.0181647805206501
ARHGAP12	SLIT3	1	0.031483108650349
ARHGAP12	SMCR8	1	0.0594180043121997
ARHGAP12	SNX14	1	-0.0615966124964423
ARHGAP12	SORBS2	1	0.0136153286822149
ARHGAP12	SOST	1	0.0417073556498613
ARHGAP12	SP110	1	0.0032005825046135103
ARHGAP12	SPG7	1	-0.00283245311246365
ARHGAP12	SSPN	1	0.0551286623454636
ARHGAP12	SUPT6H	1	0.0102895545814533
ARHGAP12	THOC7	1	-0.0010459688509857
ARHGAP12	TNRC6A	1	-0.0348631900984534
ARHGAP12	TYK2	1	-0.0296057001251684
ARHGAP12	UBR5	1	-0.0370350915753705
ARHGAP12	UTRN	1	0.0322433296381619
ARHGAP12	VIM	1	0.00845413341058388
ARHGAP12	VPS13C	1	-0.0638786333270726
ARHGAP12	YTHDC1	1	0.0135017309397224
ARHGAP17	GMPR	1	-0.012332810857161002
ARHGAP17	MTUS1	1	-0.0372082555015959
ARHGAP30	ARHGAP9	1	-0.010444716503841
ARHGAP30	CAP2	1	-0.0489968049930353
ARHGAP30	CCDC88B	1	-0.0269909785777
ARHGAP30	CD48	1	-0.0300223068262856
ARHGAP30	CPVL	1	-0.00273832935853119
ARHGAP30	CSF1R	1	-0.0233342883322558
ARHGAP30	CSF3R	1	-0.0176507617102087
ARHGAP30	CYTH4	1	-0.11097646380506698
ARHGAP30	DEF6	1	-0.0163200148006276
ARHGAP30	DENND1C	1	-0.0750951625449588
ARHGAP30	DENND2D	1	-0.0327981097125789
ARHGAP30	DOCK2	1	-0.0623739399364235
ARHGAP30	DOK2	1	-0.0214617485378574
ARHGAP30	DOK3	1	-0.0425959506791967
ARHGAP30	FGD3	1	-0.10029872942902401
ARHGAP30	GPR65	1	-0.0356268839840432
ARHGAP30	GPSM3	1	-0.0332666843638397
ARHGAP30	HCK	1	-0.0441814406602804
ARHGAP30	HMHA1	1	-0.0913078682524224
ARHGAP30	IKZF1	1	-0.0512560071875294
ARHGAP30	IL10RA	1	-0.10097013685994802
ARHGAP30	IRF5	1	-0.0192108574801641
ARHGAP30	IRF8	1	-0.0785992468108744
ARHGAP30	ITGAM	1	-0.00191021013914263
ARHGAP30	KCNQ1	1	-0.0374871861992418
ARHGAP30	MYH11	1	-0.043439071933522
ARHGAP30	MYO1F	1	-0.0243692067117946
ARHGAP30	NCF2	1	-0.00014701810429706998
ARHGAP30	NCF4	1	-0.0621959129197497
ARHGAP30	PIK3AP1	1	-0.0245950136373619
ARHGAP30	PIK3R5	1	-0.0648057768861566
ARHGAP30	PLCB2	1	-0.0250227023647134
ARHGAP30	PLEK	1	-0.0489420060875755
ARHGAP30	PTPN6	1	-0.0208968923873091
ARHGAP30	PTPRC	1	-0.0124322807312681
ARHGAP30	RNASET2	1	-0.0222333457689333
ARHGAP30	RPS6KA1	1	-0.0889820122742758
ARHGAP30	SASH3	1	-0.0586883110994714
ARHGAP30	SELPLG	1	-0.126467248514695
ARHGAP30	SH3BGRL	1	-0.0299124655135476
ARHGAP30	SLC15A3	1	-0.010182927643200002
ARHGAP30	SLCO2B1	1	-0.0170150508181981
ARHGAP30	ST14	1	-0.0173121921060309
ARHGAP30	STXBP2	1	-0.0209881486954109
ARHGAP30	TAB2	1	-0.0023203182375111197
ARHGAP30	TMC8	1	-0.0785720566194333
ARHGAP30	TRPM2	1	-0.0529764926881284
ARHGAP30	WAC	1	-0.00745440027145425
ARHGAP30	ZBTB4	1	-0.0450267496845296
ARHGAP31	CASKIN2	1	-0.0148663722861301
ARHGAP31	CCM2L	1	-0.0260150089632357
ARHGAP31	CD93	1	-0.10591037471536599
ARHGAP31	CDH5	1	-0.0186713077345728
ARHGAP31	CMIP	1	-0.0361377475485936
ARHGAP31	CYYR1	1	-0.00297240349226005
ARHGAP31	EHD4	1	-0.0158764237687156
ARHGAP31	ETS1	1	-0.0858392113954139
ARHGAP31	GIMAP6	1	-0.0910543891177763
ARHGAP31	GIMAP8	1	-0.0730790120827314
ARHGAP31	GNG11	1	-0.0357341400905181
ARHGAP31	IGFBP2	1	-0.0423718989221737
ARHGAP31	LDB2	1	-0.043468823786415
ARHGAP31	NOVA2	1	-0.007663463836812141
ARHGAP31	RASIP1	1	-0.0141108166214725
ARHGAP31	ROBO4	1	-0.0496549012645834
ARHGAP31	S1PR1	1	-0.0153008024585443
ARHGAP31	SEMA3G	1	-0.0345811240541366
ARHGAP31	SH2D3C	1	-0.0144147146915099
ARHGAP31	TSPAN7	1	-0.0306547805765456
ARHGAP35	ARNT2	1	-0.0275493392374211
ARHGAP35	ASH1L	1	-0.0515149703451445
ARHGAP35	BMP1	1	0.0598016294973924
ARHGAP35	C6orf106	1	-0.0567244506229038
ARHGAP35	FAM168B	1	-0.162548788694682
ARHGAP35	HECTD2	1	0.0713698076286045
ARHGAP35	IP6K2	1	0.0131764884393883
ARHGAP35	KDM3B	1	-0.0048325514139728794
ARHGAP35	KIRREL	1	-0.0112984214498138
ARHGAP35	PTPDC1	1	0.00729448678608866
ARHGAP35	RXRA	1	-0.11252964922303801
ARHGAP35	SPIRE1	1	-0.0323951002720528
ARHGAP35	ST6GALNAC6	1	-0.0133268369300757
ARHGAP35	TAB2	1	-0.0763278526152553
ARHGAP35	ZBTB47	1	-0.007416590415620059
ARHGAP4	C1QA	1	-0.008857530294918559
ARHGAP4	DKK2	1	-0.0026501457671621897
ARHGAP4	DOCK2	1	-0.008102791397973241
ARHGAP4	MPZL2	1	-0.0111656421314789
ARHGAP4	NCF4	1	-0.0215189176153774
ARHGAP4	PIK3R5	1	-0.00772951953783627
ARHGAP4	PLCB2	1	-0.057562284900892
ARHGAP4	RASGRP2	1	-0.009204909956389241
ARHGAP4	SASH3	1	-0.0426222137764739
ARHGAP4	STAB1	1	-0.155151070780845
ARHGAP4	VAMP8	1	-0.0591930220322543
ARHGAP44	GUCY1A3	1	-0.00447960711709777
ARHGAP44	UNC5B	1	-0.0490102034628766
ARHGAP6	DCLK1	1	-0.048512837783431996
ARHGAP6	IRAK3	1	-0.0008609869843234349
ARHGAP6	MAOA	1	-0.00269194125130489
ARHGAP6	NID1	1	-0.0288623776149445
ARHGAP9	DEF6	1	-0.0882949228058542
ARHGAP9	DENND1C	1	-0.0364160278163619
[truncated: 47,421 more rows]

## Sheet: Breast
Name1	Name2	Edge type	Edge weight
A2M	AUP1	1	0.0454360376787061
A2M	CD93	1	-0.020880631893628
A2M	CFI	1	-0.0846834098563827
A2M	DDAH2	1	0.000730729467109687
A2M	ENG	1	-0.0406344106632488
A2M	IGFBP7	1	-0.0888663938567449
A2M	IL33	1	-0.0234305666437589
A2M	RRAGC	1	0.0484559693831983
A2M	SPARCL1	1	-0.0829097885726956
A2M	TMEM56	1	0.00897517622063733
A4GALT	ACKR3	1	-0.0100275528294833
A4GALT	ERG	1	-0.00935658412763838
A4GALT	FLOT2	1	-0.0268742072657082
A4GALT	RP11-1055B8.7	1	-0.007192402280860659
AAAS	CSNK1G2	1	0.0134657224234377
AAAS	PRMT7	1	-0.0240422495912562
AAAS	SMPD3	1	-0.0031157592033093603
AAAS	ZMAT1	1	-0.006562490068771279
AADAC	CPXM1	1	-0.062927846652865
AATK	CMTM5	1	-0.0984759801018201
AATK	GFRA3	1	-0.11957422261558501
AATK	MAL	1	-0.0729129453987604
AATK	MPZ	1	-0.15321539783540802
AATK	MT3	1	-0.0279965146454934
AATK	NRXN1	1	-0.0245843693817324
AATK	PLP1	1	-0.0174529802752088
AATK	PMP2	1	-0.15409521722809197
AATK	PPP2R2B	1	-0.00657079063070552
AATK	SFRP5	1	-0.12199494481172803
AATK	SOX8	1	-0.0938441490692036
ABAT	AR	1	-0.0021264214385811
ABAT	DCXR	1	-0.00256943886903068
ABCA1	LRRC8A	1	0.0100103785540054
ABCA1	MFSD6	1	0.0404772313683805
ABCA1	PHF8	1	-0.0267896416490199
ABCA2	NCDN	1	-0.0362904772704172
ABCA5	ALG6	1	-0.0289003644823333
ABCA5	APP	1	0.0011197259567262401
ABCA5	BBS4	1	-0.0301756595695408
ABCA5	CBR4	1	-0.0018330829826228
ABCA5	CCS	1	-0.0168383860218256
ABCA5	CLK1	1	-0.0249709628403918
ABCA5	EED	1	-0.0245063807758105
ABCA5	EXOC7	1	0.00484756908426915
ABCA5	GLMN	1	-0.00866225445016327
ABCA5	GNRH1	1	-0.0104140862901959
ABCA5	MON2	1	-0.0297995079210982
ABCA5	NOL3	1	-0.0386627049666449
ABCA5	PIGB	1	-0.0695754803861869
ABCA5	PPP1R3E	1	-0.009317254984922509
ABCA5	SMCR8	1	0.00322511395763956
ABCA5	USP15	1	-0.0348395021707393
ABCA5	VPS36	1	-0.0583372348231653
ABCA5	ZNF512B	1	0.0411618372481728
ABCA5	ZNF853	1	0.0243919610385581
ABCA6	ABCA8	1	-0.00550746358865226
ABCA6	ADAM15	1	0.00112499601440091
ABCA6	CBLB	1	-0.0767046702601713
ABCA6	CRIP2	1	0.00257060073117952
ABCA6	DAB2	1	-0.0408434802850946
ABCA6	EPG5	1	-0.0146521700281589
ABCA6	EVC2	1	-0.031989291865642
ABCA6	FAM65C	1	-0.0362056406865733
ABCA6	HNMT	1	-0.0155814326875009
ABCA6	IGSF10	1	-0.0120171150585649
ABCA6	KIAA1107	1	-0.0485359246372039
ABCA6	NINL	1	-0.0141774481801888
ABCA6	PHF21A	1	-0.034264090402264
ABCA6	PHF3	1	-0.0358800249474773
ABCA6	RNF146	1	-0.0629389163985143
ABCA6	SLC43A1	1	-0.0111119338086689
ABCA6	SLC9A9	1	-0.0382502648264123
ABCA6	SPATA6	1	-0.00364104000334034
ABCA6	TEK	1	0.0136815133824522
ABCA6	TWIST1	1	-0.0234378024792244
ABCA7	CC2D1A	1	-0.0407449944900128
ABCA7	CIRBP	1	0.00809276204834485
ABCA8	ANTXR2	1	-0.0102905535359486
ABCA8	ARNT	1	-0.0151925369996151
ABCA8	C1S	1	-0.0282038884035115
ABCA8	CHL1	1	-0.0751143602637031
ABCA8	COL12A1	1	-0.0493962077311427
ABCA8	CXCL12	1	-0.10251054406448301
ABCA8	EPB41L2	1	-0.0613130100520754
ABCA8	FGF10	1	-0.0360665382854068
ABCA8	GABRE	1	-0.0282997327573389
ABCA8	LRP1	1	-0.08768136458701299
ABCA8	MXD4	1	0.00501559724125655
ABCA8	NT5E	1	-0.0572800212338027
ABCA8	OLFML1	1	-0.0209278385110348
ABCA8	ORMDL3	1	-0.00231237436259225
ABCA8	SERPING1	1	-0.000738883154189074
ABCA8	SLC9A9	1	-0.0451370969367
ABCA8	SPARCL1	1	0.0101539472010377
ABCA8	THBS2	1	-0.0369154514389471
ABCA8	TRANK1	1	-0.0632022597421011
ABCB1	EMCN	1	-0.148619347759069
ABCB1	HS3ST1	1	-0.0334777971834591
ABCB1	ITM2A	1	-0.0386705771230236
ABCB1	KCNJ2	1	-0.0314987386038511
ABCB1	LEF1	1	-0.183383353330068
ABCB1	NDP	1	-0.0339348175810656
ABCB1	PDZRN4	1	-0.0145119657946933
ABCB1	RUNDC3B	1	-0.3806858689044771
ABCB1	SELP	1	-0.0880997791636696
ABCB1	SERTM1	1	-0.0163013516698341
ABCB11	DHRS9	1	-0.15158902043084801
ABCB11	FST	1	-0.0073856928735488705
ABCB11	IFNGR2	1	-0.0285436562611507
ABCB11	LRP1B	1	-0.0224498919508178
ABCB11	PLXNB3	1	-0.0198268590130091
ABCB11	SRC	1	-0.0235594662335377
ABCB6	EIF4G1	1	-0.0396114234063119
ABCB6	GPR137B	1	0.0163979192060647
ABCB6	POLD2	1	-0.0513739750439769
ABCB6	RGS10	1	0.00623450699960478
ABCC11	ALOX15B	1	-0.19966292125690402
ABCC11	CLCA2	1	-0.0683545882993305
ABCC11	FGFR4	1	-0.0547709379893292
ABCC11	GJB1	1	-0.11507462341164099
ABCC11	HMGCS2	1	-0.197174688525725
ABCC11	KLK14	1	-0.00533859763618596
ABCC11	MUCL1	1	-0.135955180316054
ABCC11	PIP	1	-0.0118720871357618
ABCC11	SEPT6	1	-0.009447529862237021
ABCC11	SIGLEC15	1	-0.0602709504334758
ABCC11	SLC26A3	1	-0.024386988457155
ABCC11	SPINK8	1	-0.21505476845623198
ABCC11	SULT1C3	1	-0.0260955009403476
ABCC11	TRIM36	1	-0.0327879627696599
ABCC11	TRPV6	1	-0.0744728834422846
ABCC11	UNC5A	1	-0.0401233576537111
ABCC3	ABI3BP	1	0.0275250423138134
ABCC3	GRAMD2	1	-0.0353467081949981
ABCC3	KRT5	1	-0.00363682056179051
ABCC3	MGLL	1	-0.0257346298378069
ABCC3	PTPRM	1	-0.0404747729191863
ABCC3	SCNN1A	1	-0.18198229957466397
ABCC5	EML3	1	0.00808142306906525
ABCC5	INTS3	1	-0.077839810302736
ABCC5	SDCBP2	1	0.0185171799061884
ABCC5	SLC23A3	1	-0.0490984803611359
ABCC5	TSNAXIP1	1	-0.0106422753643423
ABCD2	ACSL1	1	-0.0358940871278354
ABCD2	AKAP12	1	-0.00280503260884844
ABCD2	DCXR	1	-0.0303336805537152
ABCD2	DGAT1	1	-0.046567649052909006
ABCD2	FAM166B	1	-0.0671589006876805
ABCD2	GYS1	1	-0.0854520293487583
ABCD2	IZUMO4	1	-0.0292773373304506
ABCD2	KLHL31	1	-0.252185811042737
ABCD2	PSME1	1	0.073529796333481
ABCD2	SLC16A7	1	-0.0132424224033274
ABCD2	SLC7A6	1	-0.0662803023465745
ABCD2	SPHK2	1	-0.0567314226551092
ABCD2	STC1	1	-0.0311805646540599
ABCD2	TRAF1	1	-0.0017815103950124
ABCD3	ATP6V0B	1	-0.0243844429328963
ABCD3	ATPIF1	1	-0.0484394223154036
ABCD3	POMP	1	-0.0465988535850864
ABCD3	SF3B14	1	-0.000195050406470557
ABCD4	ADM5	1	-0.0596860215602838
ABCD4	C10orf10	1	-0.0164778257714291
ABCD4	CALM1	1	0.00745506538324307
ABCD4	DARC	1	-0.0648665098588687
ABCD4	FLOT2	1	-0.0843246849273726
ABCD4	GPR68	1	-0.0385464966660052
ABCD4	ING4	1	-0.00777955179470799
ABCD4	TCTEX1D1	1	-0.00187027768615613
ABCD4	TMEM255B	1	-0.00530624099994071
ABCD4	ZNF385D	1	-0.0850352504715624
ABCG1	CETP	1	-0.00709323656950893
ABCG1	MYLIP	1	-0.0759256529776866
ABCG1	SREBF1	1	-0.146921088213599
ABCG2	ADAM19	1	0.0354348409233241
ABCG2	MYO5C	1	-0.108595713615859
ABCG2	MYRIP	1	-0.0690693957652641
ABCG2	SLC43A3	1	0.0392292521998192
ABHD14A	ADAMTSL1	1	-0.0186100906476753
ABHD14A	CST3	1	-0.0329514738965258
ABHD14A	CYB5A	1	-0.0440526176902932
ABHD14A	ECHDC2	1	-0.0355910060403648
ABHD14A	ECM2	1	-0.0827402101658131
ABHD14A	NDN	1	-0.0163973168178095
ABHD14A	OLFML1	1	-0.0907869566463486
ABHD14A	OLFML3	1	-0.0387075328260015
ABHD14A	PCDHGA5	1	-0.0135836980431056
ABHD14A	PCDHGC3	1	-0.007555793322397409
ABHD14A	PODN	1	-0.0289252135556853
ABHD14A	TLR5	1	-0.0255884520997474
ABHD16A	NXF1	1	-0.0780758266493956
ABHD17C	CHRM1	1	-0.0193252134700386
ABHD17C	SPTBN2	1	-0.0042338089112384705
ABHD17C	TMPRSS2	1	-0.0315761220538011
ABHD5	ATP2B4	1	0.0259586629814713
ABHD5	C19orf80	1	0.00608485357261688
ABHD5	DHRS9	1	-0.0283853447098242
ABHD5	EPB41L4B	1	-0.172965547555563
ABHD5	FCGRT	1	-0.0139549745771392
ABHD5	GNAI1	1	-0.0676792412811799
ABHD5	IFNGR2	1	-0.13040633370683302
ABHD5	KIAA1239	1	-0.025079553271403997
ABHD5	MAN2A2	1	-0.012561555322178997
ABHD5	ORMDL3	1	-0.11273064945956697
ABHD5	PTGER3	1	-0.0125206549627758
ABHD5	RRAGD	1	-0.0142902879336566
ABHD5	TMED5	1	-0.0574067613896798
ABHD5	TRABD2A	1	-0.0108652337746344
ABHD5	VEGFA	1	-0.023356867773831003
ABHD6	ADRB2	1	-0.0456843940192568
ABHD6	B3GNT2	1	-0.0360505368198217
ABHD6	C12orf5	1	-0.0153097184073068
ABHD6	CCDC85A	1	-0.00104713344867419
ABHD6	GNAZ	1	-0.064775717782884
ABHD6	LNX1	1	-0.0207429178315838
ABHD6	PDGFC	1	0.00136848915416503
ABHD6	SLC52A2	1	-0.0100051018465836
ABI3	ADAM15	1	-0.00616943366582743
ABI3	CCM2L	1	-0.0339401045419861
ABI3	ECSCR	1	-0.0807638682292589
ABI3	ELK3	1	-0.0802340953461106
ABI3	HYAL2	1	-0.0285339857272206
ABI3	LYL1	1	-0.0283423215091226
ABI3	NPDC1	1	-0.0348398912782127
ABI3	PODXL	1	-0.0249226055024097
ABI3BP	ADAMTSL1	1	-0.0168146991394471
ABI3BP	AMPH	1	-0.0586662970606111
ABI3BP	ANGPTL5	1	-0.0432293381018353
ABI3BP	ANKRD13B	1	-0.0307165929144602
ABI3BP	ARL4D	1	-0.0407434939872554
ABI3BP	CARD10	1	0.0111938685691553
ABI3BP	CILP	1	-0.0710218237738676
ABI3BP	COL14A1	1	-0.007431761745835591
ABI3BP	COLEC12	1	-0.0342870868820424
ABI3BP	DCAF15	1	0.00759935689829939
ABI3BP	DCLK1	1	-0.109739895205533
ABI3BP	DCN	1	-0.0493685666223636
ABI3BP	DNER	1	-0.04675769020877
ABI3BP	F10	1	-0.20029818563851104
ABI3BP	FAM213B	1	0.0290233286763707
ABI3BP	FBN1	1	-0.0315630637684957
ABI3BP	FNDC1	1	-0.00838359231863147
ABI3BP	GALNT13	1	-0.0597770103869587
ABI3BP	GFPT2	1	-0.0650486793114583
ABI3BP	GIMAP6	1	0.0489031126201414
ABI3BP	GPR133	1	-0.10319944833243
ABI3BP	HTRA3	1	-0.0071633070182800206
ABI3BP	IGDCC4	1	-0.0275766089425605
ABI3BP	IGFBP6	1	-0.0182938890869941
ABI3BP	ITGA11	1	-0.0518365643892908
ABI3BP	KCNMA1	1	-0.00265025548046197
ABI3BP	LPAR1	1	-0.0032982250026723
ABI3BP	MARCH3	1	-0.00677901239219306
ABI3BP	MMP2	1	-0.0606670773876017
ABI3BP	MRC2	1	-0.11343929741614099
ABI3BP	MYOC	1	-0.107869824229215
ABI3BP	NTN1	1	-0.0396992788755243
ABI3BP	OGN	1	-0.17673432860075797
ABI3BP	PDZRN4	1	-0.0310137583312582
ABI3BP	PODN	1	-0.0409124746779475
ABI3BP	PROCR	1	-0.0524224988116068
ABI3BP	PTPRM	1	0.0308679479583277
ABI3BP	RAB23	1	-0.0269392262542492
ABI3BP	SCARA5	1	-0.0271665656520184
ABI3BP	SHC3	1	-0.00322837701731135
ABI3BP	SIX2	1	-0.0856900728720062
ABI3BP	SLC16A7	1	-0.0457496608144463
ABI3BP	SPEF2	1	-0.0150858564461702
ABI3BP	SSC5D	1	-0.0889061790848354
ABI3BP	TIMP2	1	-0.0489601052514726
ABI3BP	UAP1	1	-0.0040738794788716896
ABI3BP	ZDHHC7	1	-0.0156556514798792
ABL1	EEF2	1	-0.0186974360211799
ABL1	FGF10	1	-0.00643519395088612
ABL1	HIVEP2	1	-0.00756140941863358
ABL1	KSR1	1	-0.041992564011648
ABL1	LRMP	1	0.0134423102720186
ABL1	NFATC4	1	-0.00723152847894337
ABL1	PCDHGC3	1	-0.000514378564595384
ABL1	PDE4D	1	-0.0207793773447527
ABL1	PRRC2B	1	-0.00160237423108004
ABL1	RBFOX2	1	-0.0436988765956412
ABL1	S1PR2	1	-0.00623106693962653
ABL1	SH3PXD2A	1	-0.0638124570815185
ABL1	SMAD3	1	-0.0037421846469693205
ABL1	SNX21	1	-0.0204245401698947
ABL1	STARD3	1	0.0019410002539217899
ABL1	THBS2	1	-0.0610339988581056
ABL1	TNFAIP6	1	-0.0372638685977146
ABL1	TWIST2	1	-0.0198642421200554
ABL1	ZHX2	1	-0.108050169126359
ABLIM1	ABLIM3	1	-0.0353896700143682
ABLIM1	ADAMTS2	1	-0.0351813904050277
ABLIM1	ADIPOR2	1	-0.0823670764902963
ABLIM1	FBXO31	1	-0.0173133023638495
ABLIM1	GBE1	1	-0.007422281559214509
ABLIM1	ITGA5	1	-0.007393421072620671
ABLIM1	MCF2L	1	-0.017190371632604
ABLIM1	RPGR	1	-0.0381559120000552
ABLIM1	SPON2	1	-0.0267840344546322
ABLIM1	TSC22D3	1	-0.0028640754637481603
ABLIM2	ADM5	1	-0.0302478231541272
ABLIM2	FBXO31	1	-0.0457599616077122
ABLIM2	GALNT18	1	-0.0198669662054001
ABLIM2	H1FX	1	-0.00986681020222827
ABLIM2	NAGS	1	-0.0037507223126387297
ABLIM2	PFDN2	1	0.0288408503023197
ABLIM2	SH3TC1	1	-0.0741036241265957
ABLIM2	TYMP	1	-0.024363314281759998
ABLIM3	BMP6	1	-0.0742367209176066
ABLIM3	CA4	1	-0.169930945777167
ABLIM3	CACHD1	1	0.0063482404492134
ABLIM3	DOCK9	1	-0.0353145028473657
ABLIM3	IL18R1	1	-0.07018672070843901
ABLIM3	KIAA1217	1	-0.0131316899819734
ABLIM3	LRMP	1	-0.0383378186011941
ABLIM3	MCF2L	1	-0.0332272359072103
ABLIM3	MGLL	1	-0.0320567886125129
ABLIM3	NOTCH4	1	-0.043473881286535
ABLIM3	PAPSS2	1	-0.0743956507409609
ABLIM3	PDE2A	1	-0.13098106618552902
ABLIM3	PEAR1	1	-0.0105192557674352
ABLIM3	PML	1	-0.0339492515720628
ABLIM3	PTPRM	1	-0.100160233392583
ABLIM3	SDPR	1	-0.0927492534424774
ABLIM3	ST6GALNAC3	1	-0.07286390211004401
ABLIM3	TAL1	1	-0.0415243176951693
ABLIM3	TRIM8	1	0.000724289418677988
ABLIM3	TSPAN13	1	-0.0356309854433498
ABLIM3	USP13	1	-0.0799180477627042
ABR	CDK18	1	-7.14723548347271e-05
ABR	CSDC2	1	-0.0019272876035606602
ABR	MICAL1	1	-0.00667234551958874
ABRACL	AP1S1	1	-0.0509330220344205
ABRACL	ARHGDIB	1	-0.00508593913827148
ABRACL	CARD9	1	-0.0181979069442347
ABRACL	HN1	1	-0.00438510857982672
ABRACL	HSBP1	1	-0.0810934972787815
ABRACL	MFSD1	1	-0.0176376537750389
ABRACL	PITRM1	1	0.0337462387255332
ABRACL	PMAIP1	1	-0.0103794805412187
ABRACL	PPP1CA	1	-0.0311956408521251
ABRACL	PYCARD	1	-0.153793636848032
ABRACL	SH3BGRL	1	-0.0297424753080722
ABRACL	ST14	1	-0.00427934465253541
ABRACL	STAC3	1	-0.00819399546250715
ABRACL	TET3	1	-0.0322465414420125
ABRACL	TMEM86A	1	-0.005177343908268429
ABRACL	VAMP8	1	-0.120417929008417
ABTB1	CNNM3	1	-0.014284006627928999
ABTB1	CYR61	1	-0.0274122011029842
ABTB1	KIF3C	1	-0.0497856230620037
ABTB1	MED25	1	-0.0447327047255507
ABTB2	APPL2	1	0.00032498294051869903
ABTB2	CLCA4	1	-0.0124519601417892
ABTB2	CRTAC1	1	-0.0244398227187328
ABTB2	FOXI1	1	-0.0660560321530004
ABTB2	KDM6B	1	-0.013551636016508
ABTB2	LMNA	1	-0.0421823549584244
ABTB2	LOXL4	1	-0.0419277250353197
ABTB2	MAP2K3	1	-0.111968932624461
ABTB2	NALCN	1	-0.0005224232264686191
ABTB2	NCALD	1	-0.0038913311850516602
ABTB2	PLEKHB1	1	-0.0115610523712919
ABTB2	RASAL1	1	-0.0359966006938387
ABTB2	SERPINA11	1	0.0440024377745259
ABTB2	SLC13A2	1	-0.0293013272246711
ABTB2	SOX8	1	-0.0039188189865668605
AC006116.20	GRP	1	-0.00292653370352785
AC006116.20	SLC7A3	1	-0.00407376157962083
AC007461.1	ATP2A3	1	-0.0129824813727301
AC007461.1	ATP6V1B1	1	-0.035467520074087
AC007461.1	CDC42BPG	1	-0.0620425778444213
AC007461.1	EHF	1	-0.0104186482558431
AC007461.1	EPHB3	1	-0.0291582069322207
AC007461.1	FOLR1	1	-0.0120344564361252
AC007461.1	FOXI1	1	-0.15458495114597
AC007461.1	KLK5	1	-0.0243787594056241
AC007461.1	MUC15	1	-0.00208633067920807
AC007461.1	PAK3	1	-0.0961966117885932
AC007461.1	PIK3C2G	1	-0.0418971005788134
AC007461.1	PKP1	1	-0.00387217381953541
AC007461.1	SOX8	1	-0.0701044003479464
AC007461.1	TFCP2L1	1	-0.127113451216189
AC091801.1	PIEZO2	1	-0.00824110578870363
AC131097.4	ME1	1	-0.0903206176056858
AC131097.4	PRRT4	1	-0.0756759664503986
AC131097.4	TKT	1	-0.0428147478480066
ACAA1	AGFG1	1	-0.0310340117994659
ACAA1	ALOX5AP	1	-0.00702548968945007
ACAA1	ATP6V0B	1	-0.0196261718944195
ACAA1	ATP6V0E1	1	-0.0237438638719104
ACAA1	CBX6	1	0.00742246752479205
ACAA1	CCDC28A	1	-0.0950425540156053
ACAA1	CYTIP	1	-0.0198623484871782
ACAA1	DGCR8	1	0.0188515904651238
ACAA1	GPR183	1	-0.0224826679053866
ACAA1	MARCH5	1	-0.0545285612193148
ACAA1	NYNRIN	1	0.0950507161647248
ACAA1	RNF146	1	-0.0298199206364987
ACAA1	ZNF512B	1	0.0456262882111955
ACACA	ACLY	1	-0.267478460578596
ACACA	ADAM33	1	-0.00926695729005149
ACACA	ADIPOR2	1	-0.00201043836258728
ACACA	COL5A1	1	-0.0476391397797433
ACACA	DBI	1	-0.0908057615432413
ACACA	DHCR24	1	-0.0152816916159435
ACACA	DHCR7	1	-0.0106327208978805
ACACA	EBP	1	-0.0102518061466619
ACACA	ECHS1	1	-0.0061293170262635205
ACACA	ELOVL5	1	-0.04050096873052
ACACA	EPHX1	1	-0.0347696031952956
ACACA	FAM134B	1	-0.0596310155683775
ACACA	FAM166B	1	-0.0242561000408693
ACACA	FCN2	1	-0.0684057009122474
ACACA	GBE1	1	-0.0339789689683034
ACACA	GYPC	1	-0.17111377078627601
ACACA	INSIG1	1	-0.0931641407260967
ACACA	KCNE1	1	-0.00814173865090908
ACACA	LDHB	1	-0.007097235682930459
ACACA	MAMDC4	1	-0.0898345589425399
ACACA	ME1	1	-0.136001356977671
ACACA	MID1IP1	1	-0.0658320582100936
ACACA	NKD2	1	-0.0305899310378565
ACACA	NUDT8	1	-0.034618685216344
ACACA	P4HA2	1	-0.0306805260683075
ACACA	PHPT1	1	-0.0199247509993699
ACACA	PPP1CA	1	0.0423327983840023
ACACA	PRRT4	1	-0.0230370570107014
ACACA	SERPINB6	1	-0.0167323809499074
ACACA	SHMT2	1	-0.0514639490259605
ACACA	SLC16A7	1	-0.00825042987789364
ACACA	SLC19A1	1	-0.0468945426813738
ACACA	THRSP	1	-0.0259543049597918
ACAD10	MGEA5	1	-0.0265739032778595
ACAD10	RECQL5	1	-0.00943801684178576
ACAD10	ZNF853	1	0.0176348231266433
ACAD11	ATP5B	1	-0.0034082018140172
ACAD11	PNISR	1	-0.0857856904126712
ACAD11	TBX19	1	-0.0555978694647829
ACAD8	DECR1	1	-0.0591655937067789
ACAD8	MAP3K12	1	-0.0227426617333376
ACAD8	UBN2	1	-0.0129945309138052
ACADL	ADAMTS3	1	-0.0675820760045781
ACADL	CNKSR2	1	-0.0516861795661243
ACADL	ECHDC2	1	-0.0865180961022047
ACADL	IGFBP6	1	-0.0078522330123734
ACADL	KANSL1L	1	-0.128335735784286
ACADL	KCNK2	1	-0.00506790878428194
ACADL	NPY2R	1	-0.0455744423050081
ACADL	PDE7A	1	-0.0782590158418286
ACADL	PID1	1	-0.00453204461063528
ACADL	RIMS4	1	-0.0567570562615994
ACADL	UBP1	1	0.0178020466597021
ACADS	BSG	1	-0.0674989068318911
ACADS	DERL1	1	-0.0341246990035748
ACADS	ECI2	1	-0.0115061239656367
ACADS	FAM47E-STBD1	1	-0.0149318230491826
ACADS	H2AFJ	1	-0.035982125136487
ACADS	HEBP2	1	-0.0300265117481943
ACADS	PALM	1	-0.0399054127354966
ACADS	PDE3B	1	-0.0362093612410757
ACADS	PLA2G16	1	-0.0445194455819727
ACADS	SLC43A1	1	-0.00881909166235236
ACADS	STX11	1	-0.0594253540639068
ACADS	TM7SF2	1	-0.0563840538839446
ACADS	TST	1	-0.0345885272079123
ACADVL	CAT	1	-0.00516842655386542
ACADVL	PDK4	1	-0.112997066648999
ACADVL	UBXN4	1	-0.0146739767883884
ACAP3	CCNL2	1	-0.00185626866416372
ACAP3	CDKN3	1	0.0253469248413038
ACAP3	GDF10	1	-0.0319399993687261
ACAP3	IFI16	1	0.00339902171348431
ACAP3	KLHL17	1	-0.0269420820694568
ACAP3	MIB2	1	-0.0976798739303431
ACAP3	RAVER2	1	-0.0535510203740561
ACD	ENKD1	1	-0.078899346847631
ACE2	FGF12	1	-0.0106950849227593
ACE2	PRKAR1A	1	-0.00280066221866588
ACE2	RGL3	1	-0.0040434174326736
ACHE	MVD	1	-0.0184143504973861
ACIN1	ACTR1B	1	0.0293936117478154
ACIN1	ARNT	1	-0.0400882153979294
ACIN1	ATPIF1	1	0.00489094636448147
ACIN1	CMTR2	1	-0.0339142275104658
ACIN1	DDX39B	1	-0.0014315398553338698
ACIN1	FAM132A	1	0.0598989957782234
ACIN1	FAM213B	1	0.0468926560847737
ACIN1	HNRNPA2B1	1	-0.038426476752694005
ACIN1	LEO1	1	-0.00896389703372089
ACIN1	MAP3K12	1	-0.0146849035328186
ACIN1	MASP2	1	0.009242000639587791
ACIN1	OXLD1	1	0.0134648376236789
ACIN1	PPP1R35	1	0.018624482722727
ACIN1	RANBP10	1	-0.044059113695399
ACIN1	RBM5	1	-0.149735258741992
ACIN1	SF3B2	1	-0.00964114707390892
ACIN1	TP53BP1	1	-0.0570436290659238
ACKR3	CALHM2	1	-0.0716898661134528
ACKR3	DLGAP4	1	-0.0168196647798576
ACKR3	GGT7	1	-0.0255643395909379
ACKR3	GPR133	1	-0.0591383887746374
ACKR3	HMCN2	1	-0.001873787046715
ACKR3	LIMD2	1	0.0159508960759531
ACKR3	LST1	1	0.000142606723276317
ACKR3	LTBP2	1	-0.12561142985998
ACKR3	MN1	1	-0.0155177570711927
ACKR3	PAMR1	1	-0.00218969498096433
ACKR3	PRRX2	1	-0.0136837740072579
ACKR3	SCARA5	1	-0.0308876688314282
ACKR3	SLC23A3	1	-0.0308540363335046
ACKR3	VASN	1	-0.071708588817788
ACKR3	WISP2	1	-0.0268307458305914
ACKR3	ZNF503	1	-0.008380586407123991
ACLY	ACSS2	1	-0.0424912200633723
ACLY	ADIPOR2	1	-0.10702084908623301
ACLY	ALDH1L2	1	-0.0243643896079674
ACLY	C19orf80	1	-0.0261539067286164
ACLY	CD52	1	9.51456074830825e-05
ACLY	COL5A1	1	-0.0336482737573804
ACLY	DLAT	1	-0.154838880680292
ACLY	FADS2	1	-0.13419549146801
ACLY	FAM166B	1	-0.10222845172559801
ACLY	HES6	1	-0.0525527495812671
ACLY	INSIG1	1	-0.0258048663954558
ACLY	KCNE1	1	-0.0655906991424302
ACLY	KLC2	1	-0.042908273793265
ACLY	ME1	1	-0.12273590466508198
ACLY	MID1IP1	1	-0.0840756080242297
ACLY	MMP17	1	-0.0181393021255774
ACLY	MVD	1	-0.135972294448191
ACLY	NKD2	1	-0.061508274963657995
ACLY	NSDHL	1	-0.10874881880715198
ACLY	OLFM2	1	-0.135099543429732
ACLY	PDHB	1	-0.13444309729009699
ACLY	RMDN3	1	-0.0490214843406782
ACLY	SERPINB6	1	-0.0009671444172372199
ACLY	SHMT2	1	-0.0184278806719579
ACLY	SLC25A22	1	-0.0500873129831203
ACLY	SLC4A4	1	-0.0454446676282011
ACLY	SPON2	1	-0.0111421794284663
ACLY	THRSP	1	-0.0713055364614922
ACOT7	PLOD1	1	-0.0230190471767737
ACOT7	TBCB	1	-0.00341546376896797
ACOT7	ZNF414	1	-0.00025682458128554705
ACP5	ALCAM	1	-0.00618247711028958
ACP5	ASAH1	1	-0.0954214097010954
ACP5	CD37	1	-0.0103066023205024
ACP5	CD52	1	-0.105558295428034
ACP5	CHIT1	1	-0.109424024505169
ACP5	CTSD	1	-0.0637696529593409
ACP5	CTSZ	1	-0.005934054677204321
ACP5	DCSTAMP	1	-0.10311382689126
ACP5	FBP1	1	-0.12423878280416001
ACP5	FGR	1	-0.0478330036481556
ACP5	IFI30	1	-0.0425624992397711
ACP5	IGSF6	1	-0.0644138009638738
ACP5	IL10RA	1	-0.0218060457605635
ACP5	IL1RN	1	-0.0326818217290734
ACP5	IQGAP2	1	-0.0769890953841444
ACP5	LPAR2	1	-0.0018758301045210001
ACP5	MSR1	1	-0.0160667263055964
ACP5	NCEH1	1	-0.0260063937510739
ACP5	PIK3R5	1	-0.0519032490891756
ACP5	PLA2G7	1	-0.124873581144069
ACP5	PLD3	1	-0.00898046248087537
ACP5	SLC15A3	1	-0.0760274061884233
ACP5	ST14	1	-0.038254587102288
ACP5	TFEC	1	-0.0167641585106683
ACP5	TREM2	1	-0.0533307540310969
ACP5	TYROBP	1	-0.0499637061205475
ACRBP	ALS2CL	1	0.030041434433762004
ACRBP	C1QB	1	-0.00480477843315679
ACRBP	C1QC	1	-0.0227295249438846
ACRBP	CD4	1	-0.0221463916723574
ACRBP	EVI2A	1	-0.0725414463541463
ACRBP	GRN	1	-0.031559212648188
ACRBP	PLD3	1	-0.0015876106762517301
ACRBP	TYROBP	1	-0.0210050771357956
ACSF2	KRT79	1	-0.0412194988927132
ACSF2	REEP6	1	-0.000706370228988951
ACSL1	AGPAT2	1	-0.0596280711728395
ACSL1	C19orf80	1	-0.0310874940053951
ACSL1	CHCHD10	1	-0.106592822390502
ACSL1	CYB5A	1	-0.053255034688807
ACSL1	DGAT2	1	-0.0509857899564254
ACSL1	ECHS1	1	-0.03382912357598299
ACSL1	FAM166B	1	-0.00167395136923976
ACSL1	FOXO1	1	-0.0466690950847278
ACSL1	GPAM	1	-0.15069853484923498
ACSL1	GPT	1	-0.114300223629955
ACSL1	GYS1	1	-0.0332432337244864
ACSL1	IRAK3	1	-0.0186802123807516
ACSL1	ITGA5	1	-0.045888401192502995
ACSL1	ITGA7	1	-0.0096764829699258
ACSL1	KLF15	1	-0.0382901872364169
ACSL1	LGALS12	1	-0.0899841422166759
ACSL1	LPL	1	-0.0864478935791113
ACSL1	MARC1	1	-0.0434811152429374
ACSL1	MRAP	1	-0.0110978708780671
ACSL1	P4HA2	1	-0.0278697004974418
ACSL1	PC	1	-0.0663474583991812
ACSL1	PRRT4	1	-0.0912381791108306
ACSL1	SEMA4B	1	-0.0117093897904738
ACSL1	SLC1A3	1	-0.0142365467143418
ACSL1	SLC7A6	1	-0.0774637045983903
ACSL1	SQSTM1	1	0.0203003352187899
ACSL1	TENC1	1	-0.033296737720924
ACSL1	TSC22D3	1	-0.0119006294458315
ACSL3	C2orf88	1	-0.0190020704166367
ACSL3	DBI	1	-0.135479903911007
ACSL3	FMNL2	1	-0.009878038508770741
ACSL3	RIC3	1	0.0149964039784149
ACSM1	SULT1C3	1	-0.13619045316327302
ACSM3	C19orf77	1	-0.0613049244935099
ACSM3	CAMSAP3	1	-0.0143709672096513
ACSM3	ELOVL5	1	-0.0266313957680138
ACSM3	ENTPD2	1	-0.0298860420169575
ACSS2	ADORA1	1	-0.0399486399618758
ACSS2	DGAT1	1	-0.030462484480926002
ACSS2	GGT7	1	-0.0019801284802190198
ACSS2	ME1	1	-0.0958679362146997
ACSS2	PDGFC	1	-0.0407381521113204
ACSS2	SLC16A7	1	-0.0574942092184219
ACSS2	SREBF1	1	-0.0502544908472139
ACSS2	TKT	1	-0.0566920770283377
ACSS3	ACVR1C	1	-0.0693385826409733
ACSS3	AIF1L	1	0.057021010668319
ACSS3	ANG	1	-0.0411143413820161
ACSS3	ANTXR2	1	-0.0147091358094309
ACSS3	APMAP	1	-0.0334201978368498
ACSS3	C10orf90	1	0.0164450878203729
ACSS3	CD59	1	0.0160251869744345
ACSS3	CRY2	1	-0.0003671411091015
ACSS3	CYYR1	1	0.0118868920860058
ACSS3	ELL	1	-0.030140312538261004
ACSS3	EVC2	1	-0.0020616584521683102
ACSS3	GPT2	1	-0.0439846818483457
ACSS3	GRINA	1	-0.0288947060662171
ACSS3	HNMT	1	-0.122307715927443
ACSS3	LRCH1	1	0.00182772872517041
ACSS3	MAP3K5	1	-0.006475269380305001
ACSS3	MFSD6	1	0.009256543350779991
ACSS3	NAALAD2	1	-0.00290193287343179
ACSS3	PCBD1	1	-0.00955991897294076
ACSS3	PCK2	1	-0.0143069877070052
ACSS3	PDE9A	1	0.0044550944317769394
ACSS3	PEX19	1	-0.10095492431646601
ACSS3	PHF21A	1	-0.0303046116663871
ACSS3	PHF8	1	-0.0109512048106529
ACSS3	PMM1	1	-0.0862097124375729
ACSS3	SERPING1	1	-0.125755851229892
ACSS3	STK39	1	-0.00567613486963256
ACSS3	SVEP1	1	-0.0316739138858115
ACSS3	TSPAN12	1	0.0207012471494072
ACSS3	TWIST1	1	-0.008021252747084491
ACTA1	CKM	1	-0.23268261364871598
ACTA1	KLHL41	1	-0.0243139050803613
ACTA1	MB	1	-0.11140400301801599
ACTA1	MYL1	1	-0.139334373017793
ACTA1	MYL2	1	-0.219458130556041
ACTA1	MYLPF	1	-0.000317876892296454
ACTA1	TCAP	1	-0.0549964148883934
ACTA1	TNNC2	1	-0.0938341966480277
ACTC1	ACTN2	1	-0.0200469340494261
ACTC1	COX6A2	1	-0.0227060693868221
ACTC1	DES	1	-0.154977130002659
ACTC1	ITIH3	1	-0.0301365936738734
ACTC1	MYOZ1	1	-0.0168347576911513
ACTC1	RAMP1	1	-0.0104339784566249
ACTC1	TNNC1	1	-0.057001942084022005
ACTG2	AMIGO2	1	-0.0274670339906712
ACTG2	CALD1	1	-0.0285651758849266
ACTG2	CNN1	1	-0.424994367657348
ACTG2	CSRP1	1	-0.164400628612712
ACTG2	FAM46B	1	-0.029331050999558
ACTG2	IL17B	1	-0.0873893720633106
ACTG2	ILK	1	-0.0244700280574953
ACTG2	JPH2	1	-0.0402792902507442
ACTG2	MYH11	1	-0.11525003459603399
ACTG2	NCS1	1	-0.0757160550382026
ACTG2	PDLIM7	1	-0.0755399209567351
ACTG2	PRUNE2	1	-0.0365110925573171
ACTG2	RASL12	1	-0.0327209476465832
ACTG2	SERPINB5	1	-0.0484945481180331
ACTG2	SMTN	1	-0.0070539456060501795
ACTG2	SULF1	1	-0.025422870657637996
ACTG2	SYNM	1	-0.0243810924473264
ACTG2	TPM2	1	-0.11012208952857001
ACTG2	WNK2	1	-0.0291637004680751
ACTN2	CKM	1	-0.16015925967507502
ACTN2	COX6A2	1	-0.07831754690231199
ACTN2	KLHL41	1	-0.0185739468572551
ACTN2	MB	1	-0.142956668383117
ACTN2	MYL1	1	-0.0042444214121669
ACTN2	MYL2	1	-0.11476515260717801
ACTN2	SLN	1	-0.00869703915629672
ACTN2	TCAP	1	-0.0175088280523269
ACTR1B	DCN	1	0.0362783677211996
ACTR1B	DDIT3	1	0.0034916203067331
ACTR1B	DNAJA4	1	0.0018559384199401399
ACTR1B	EVC2	1	0.0109287413263505
ACTR1B	FAM129B	1	-0.0333586332500842
ACTR1B	FAM213B	1	-0.0951525720535691
ACTR1B	HUWE1	1	0.00976029357227873
ACTR1B	LMAN2L	1	0.0473086504376477
ACTR1B	OS9	1	0.0299386452429135
ACTR1B	PSAP	1	0.0219590923479677
ACTR1B	PSKH1	1	-0.0248843054567746
ACTR1B	TAOK2	1	-0.00564352340362927
ACTR1B	XPNPEP2	1	0.00818052351379549
ACTR1B	YJEFN3	1	0.006012056381916471
ACVR1	ANTXR2	1	-0.0274027163467399
ACVR1	DDR1	1	-0.0891715904660049
ACVR1	EVC2	1	-0.0474756242877369
ACVR1	FHOD3	1	-0.0193387998518788
ACVR1	GLI3	1	-0.0307079822832677
ACVR1	GPD1L	1	-0.01557694882841
ACVR1	KDM4A	1	-0.0252876112823666
ACVR1	KIAA1239	1	-0.0498084698615167
ACVR1	KLHL13	1	-0.0330272071346676
ACVR1	MMP14	1	-0.00408345138200937
ACVR1	MYH10	1	-0.0464357520572987
ACVR1	PGM1	1	-0.003958652608553329
ACVR1	PHF8	1	-0.00866306024487541
ACVR1	RRAGC	1	-0.0269207269984133
ACVR1	TCF7L2	1	-0.13902009059706302
ACVR1	TEAD1	1	-0.0833776131804299
ACVR1	TWIST1	1	-0.00433588222149676
ACVR1	VEGFA	1	-0.104738285044607
ACVR1	WDTC1	1	-0.0161805045083286
ACVR1	ZNF609	1	-0.0102810897194902
ACVR1B	PSMA4	1	0.00759984702742868
ACVR1B	SMAD3	1	-0.0133678339807727
ACVR1B	SORBS1	1	-0.0244259688127948
ACVR1B	TLCD2	1	-0.0310106033893397
ACVR1B	TRIM8	1	-0.0114991769835482
ACVR1C	AGPAT9	1	-0.0973170616761208
ACVR1C	ALDH1A1	1	-0.0104280742335554
ACVR1C	AMN	1	-0.044175806946864994
ACVR1C	ANG	1	-0.00962744870143208
ACVR1C	ANKRD53	1	-0.0242141087216429
ACVR1C	ANO6	1	-0.0630293021081038
ACVR1C	DTX1	1	-0.0106562121121467
ACVR1C	ELOVL3	1	-0.011505727862575001
ACVR1C	EPB41L4B	1	-0.0221020211105564
ACVR1C	FAM89A	1	-0.0076699322397415
ACVR1C	GPT2	1	-0.012122837941555002
ACVR1C	GYG2	1	-0.0511167234123926
ACVR1C	HADH	1	-0.0286342803083146
ACVR1C	HEPACAM	1	-0.0132717295405397
ACVR1C	KIAA1239	1	-0.000104364168461827
ACVR1C	MAP3K5	1	-0.0267401904064167
ACVR1C	NAT8L	1	-0.11560308370538
ACVR1C	ORMDL3	1	-0.0007751918048148661
ACVR1C	PCBD1	1	-0.0156714185642133
ACVR1C	PDE3B	1	-0.0394054848433234
ACVR1C	PEX19	1	-0.0056591190586605
ACVR1C	PFKFB3	1	-0.0103206383894852
ACVR1C	PHLDB2	1	-0.00407074935472244
ACVR1C	PMM1	1	-0.0276416247156232
ACVR1C	PTGER3	1	-0.0621527073739667
ACVR1C	RASL10B	1	-0.0217409598079246
ACVR1C	SLC27A2	1	-0.0231324234548856
ACVR1C	SLC43A3	1	-0.00415690060985038
ACVR1C	ST6GALNAC6	1	-0.0166969189410366
ACVR1C	TM7SF2	1	-0.114951564940087
ACVR1C	TMEM132C	1	-0.0953289791999608
ACVR2A	C7orf55-LUC7L2	1	-0.000293538842632706
ACVR2A	CCDC84	1	-0.0219991508930998
ACY1	ATP5B	1	-0.0144953921291524
ACY1	BAD	1	0.0285621010524304
ACY1	BCL7B	1	0.0152305070559219
ACY1	COL6A3	1	-0.00539941001734316
ACY1	DECR1	1	-0.0391409579464866
ACY1	DNPH1	1	-0.00550848007539592
ACY1	ECHS1	1	-0.00743268048706958
ACY1	MRPL24	1	-0.0228907839007037
ACY1	PGAP2	1	-0.0436483456182141
ACYP1	ARGLU1	1	-0.0209225636741966
ADA	ANGPTL5	1	-0.0237155865988957
ADA	B3GALTL	1	-0.0486246012508536
ADA	CHST7	1	-0.0157762124843774
ADA	CXCL14	1	-0.0300337773072858
ADA	DKK1	1	-0.0675660560524401
ADA	GALNT13	1	-0.0968911431529008
ADA	HTRA3	1	-0.072052937794469
ADA	IL16	1	-0.0589563876027637
ADA	IL17RC	1	-0.0113856547107149
ADA	PDZRN4	1	-0.155865880893556
ADA	SIX2	1	-0.00106732673858148
ADA	SLITRK4	1	-0.0333372425903137
ADA	TUBA8	1	-0.00354206500736919
ADA	VIT	1	-0.0468116484770181
ADAD2	TAF1C	1	-0.0841589879182656
ADAM10	CPEB2	1	-0.0275939746156402
ADAM10	PLAT	1	-0.0164255285066191
ADAM10	PLEKHG1	1	-0.00450152440017344
ADAM10	PPIC	1	-0.000610370638993437
ADAM10	SH3BGRL	1	-0.000265895711716778
ADAM10	SPARCL1	1	-0.013740219606586999
ADAM12	ART5	1	-0.0033618104162319398
ADAM12	C13orf45	1	-0.029694085577167004
ADAM12	CLEC11A	1	-0.0581411126649779
ADAM12	COL5A2	1	-0.0334349033580058
ADAM12	CPXM1	1	-0.0866756321900079
ADAM12	DLK1	1	-0.0060983562366252
ADAM12	EMILIN1	1	-0.00200952750183555
ADAM12	FAM20A	1	-0.0155967967542507
ADAM12	JPH2	1	0.00577266932966862
ADAM12	KCNA1	1	-0.0945324993198761
ADAM12	MEX3B	1	-0.0375859446394316
ADAM12	PLAGL1	1	-0.0491048187478114
ADAM12	POSTN	1	-0.0200029177830683
ADAM12	PSD	1	-0.108423075434428
ADAM15	ADCY4	1	-0.114064294010098
ADAM15	AIF1L	1	-0.116134209449687
ADAM15	ALS2CL	1	-0.0840668777883207
ADAM15	APLNR	1	-0.0198137758221661
ADAM15	ARMCX1	1	0.0489316865249746
ADAM15	ARNT	1	0.021439137196668998
ADAM15	C14orf80	1	-0.0206563311595155
ADAM15	CALML4	1	-0.0310955442512525
ADAM15	CASKIN2	1	-0.008702443940678659
ADAM15	CCM2L	1	-0.150829495136613
ADAM15	CRIP2	1	-0.0532139702369952
ADAM15	CYYR1	1	-0.0302679547019018
ADAM15	DDRGK1	1	0.0252117942858761
ADAM15	FAM129B	1	-0.0193636642412818
ADAM15	FAM65A	1	-0.0107965418993778
ADAM15	GDF15	1	0.110343063552987
ADAM15	GORASP1	1	-0.0699449020583225
ADAM15	HEG1	1	-0.0989336464567039
ADAM15	HYAL2	1	-0.0578980514763449
ADAM15	IFI27	1	-0.0331358272204168
ADAM15	ITGA6	1	-0.0633263437701969
ADAM15	JAG2	1	-0.0175521034432265
ADAM15	KLF13	1	-0.0077004956536411906
ADAM15	LHX6	1	-0.0347487000759109
ADAM15	LYSMD2	1	-0.0240747500678607
ADAM15	NPDC1	1	-0.101488383012606
ADAM15	PHF3	1	0.038216893580386
ADAM15	PODXL	1	-0.0281189337701676
ADAM15	PPAP2C	1	-0.00376128404634389
ADAM15	PPFIA3	1	-0.10523790724432198
ADAM15	PPP1R13B	1	-0.0285137961861576
ADAM15	RIPK3	1	-0.0036230437941531897
ADAM15	RNF31	1	-0.0151970329625467
ADAM15	SEMA3F	1	-0.0230786489168714
ADAM15	SH2D3C	1	-0.0621960081333735
ADAM15	SHMT2	1	0.00836818217465701
ADAM15	SLC16A14	1	-0.0224306975775273
ADAM15	ST6GALNAC1	1	-0.0697822687335501
ADAM15	TEK	1	-0.0527510390371373
ADAM15	TP53BP1	1	0.0335448723255878
ADAM15	UQCRC1	1	0.0286147416094897
ADAM15	WASF1	1	0.0479742761150126
ADAM15	ZNF609	1	0.00983934735047135
ADAM19	ARHGDIB	1	0.009047475339586141
ADAM19	FZD10	1	-0.0131463505735773
ADAM19	GATA6	1	-0.0404083892253671
ADAM19	KCNAB2	1	0.00546769479681531
ADAM19	MPP7	1	-0.0206091580872831
ADAM19	PDE3A	1	-0.00578453206040399
ADAM19	PROX1	1	-0.0573630979560475
ADAM19	PRRX2	1	-0.00755575652208793
ADAM19	RELN	1	-0.10791923165407
ADAM19	TSPAN11	1	-0.0154309946351953
ADAM28	CD86	1	-0.0640383200883651
ADAM28	GPSM3	1	-0.00443112914011731
ADAM28	LAPTM5	1	-0.0296673365616324
ADAM33	ADD3	1	-0.0297757455165544
ADAM33	CDKN2C	1	-0.0492399312788816
ADAM33	COL16A1	1	-0.12485431360869302
ADAM33	COL5A1	1	-0.0431600487464421
ADAM33	COL6A1	1	-0.0110492655044076
ADAM33	CRABP2	1	-0.0528063330745735
ADAM33	CRIM1	1	0.015242624849680001
ADAM33	CTSK	1	-0.0312466282483228
ADAM33	DCLK1	1	-0.11289453372720698
ADAM33	DTX3	1	-0.0233704911710509
ADAM33	FAIM3	1	0.00672212395250393
ADAM33	FAM180A	1	-0.0752484495570006
ADAM33	FAM46A	1	-0.0612725911086395
ADAM33	FAP	1	-0.0154514818023379
ADAM33	FIGF	1	-0.15078658083292198
ADAM33	FRMD6	1	-0.00577199247895076
ADAM33	GALNT12	1	-0.0560953895734033
ADAM33	GLI2	1	-0.072826731834648
ADAM33	ISLR	1	-0.161568615017107
ADAM33	LHFPL2	1	-0.0189502097698811
ADAM33	LRIG3	1	-0.0275892116134744
ADAM33	MAP1A	1	-0.00354753658916517
ADAM33	MAP3K11	1	0.00470523344526014
ADAM33	MITF	1	-0.0167850829382321
ADAM33	MRC2	1	-0.00531224089738692
ADAM33	NOVA1	1	-0.00972368265837678
ADAM33	NT5E	1	-0.0059511185005591705
ADAM33	OGN	1	-0.0223743377738688
ADAM33	OLFML1	1	-0.133520529044929
ADAM33	OLFML3	1	-0.0648657528700185
ADAM33	P4HA2	1	-0.03399150590517
ADAM33	PRRT2	1	-0.0103770310555538
ADAM33	RBFOX2	1	-0.0229868539951535
ADAM33	RCN3	1	-0.0616257172862305
ADAM33	RECK	1	-0.157236210024132
ADAM33	SRRM2	1	-0.0134851881820546
ADAM33	TCEAL7	1	-0.0561284534953961
ADAM33	TRIO	1	-0.0281889919373383
ADAM33	ZFPM2	1	-0.032953570458635
ADAM8	GNA13	1	-0.0191211507553617
ADAM8	IL8	1	-0.0214210610093325
ADAM8	PFKFB4	1	-0.000414040459481801
ADAM8	PTPRC	1	-0.0369790714852019
ADAM8	TREM1	1	-0.0182658511641242
ADAM9	C10orf137	1	0.0181578307406298
ADAM9	CCNG2	1	-0.0138257118032242
ADAM9	DGCR8	1	0.0267878125553786
ADAM9	DUS3L	1	0.0333913756934792
ADAM9	EML2	1	-0.00817616619643704
ADAM9	GNA13	1	-0.0453791502567645
ADAM9	GNA15	1	-0.0246699514184898
ADAM9	HN1	1	-0.0298670498219476
ADAM9	NOP2	1	0.0437560952113155
ADAM9	PPAN	1	0.0550629419180996
ADAM9	SRRT	1	0.0830234275262833
ADAM9	TAOK2	1	0.0198383594088298
ADAMTS1	C11orf96	1	-0.10268388350707801
ADAMTS1	CASKIN2	1	-0.0524691212481271
ADAMTS1	CDKN1A	1	-0.0744016176856573
ADAMTS1	CSRNP1	1	-0.00633493415221652
ADAMTS1	EGR3	1	-0.0161991635960361
ADAMTS1	GRASP	1	-0.009823758961445571
ADAMTS1	HEG1	1	-0.0151899135418521
ADAMTS1	HEYL	1	-0.026379588694869997
ADAMTS1	ID3	1	-0.0181769561509503
ADAMTS1	IL6	1	-0.152476616207388
ADAMTS1	LRRC10B	1	-0.0390403460701395
ADAMTS1	MYC	1	-0.0759938109005538
ADAMTS1	NR4A3	1	-0.11178546205969801
ADAMTS1	SIK1	1	-0.0422713942212265
ADAMTS1	SNAI1	1	-0.0075099499265149205
ADAMTS1	THBD	1	-0.118509679885759
ADAMTS1	TRAF4	1	-0.0135262844162514
ADAMTS12	LUM	1	-0.00522576290744429
ADAMTS12	TWIST1	1	-0.0468212158954716
ADAMTS15	MDK	1	-0.0159922096553301
ADAMTS16	COL6A6	1	-0.0511263219227528
ADAMTS16	FBN1	1	-0.0689297505119411
ADAMTS16	FNDC1	1	-0.19940851617695302
ADAMTS16	VASH2	1	-0.0328797702485868
ADAMTS18	ATP13A2	1	-0.00879955667158579
ADAMTS18	B3GNT5	1	-0.0362481879120785
ADAMTS18	BAALC	1	-0.0259710961519945
ADAMTS18	BMP6	1	-0.0543498584725831
ADAMTS18	CCRL2	1	-0.0568471392646824
ADAMTS18	CENPV	1	-0.000894129456305223
ADAMTS18	CLDN5	1	-0.0193451258036241
ADAMTS18	GNAZ	1	-0.0459193058969287
ADAMTS18	KIAA1217	1	-0.000699426173977391
ADAMTS18	RAPGEF5	1	-0.0012783601639047599
ADAMTS18	TSPAN6	1	-0.00955547142752567
ADAMTS18	ZNF275	1	-0.10863511156426599
ADAMTS2	CALU	1	-0.10708487841739699
ADAMTS2	COL5A1	1	-0.0606574810472429
ADAMTS2	COL5A2	1	-0.0267741420844481
ADAMTS2	COL6A1	1	-0.0340824804205451
ADAMTS2	COL6A2	1	-0.00448338892697366
ADAMTS2	FSTL1	1	-0.00988297920281551
ADAMTS2	RCN3	1	-0.0014150051947472801
ADAMTS2	SPARC	1	-0.00540198572599496
ADAMTS3	AMPH	1	-0.0194274356239071
ADAMTS3	B3GALTL	1	-0.0330721878901964
ADAMTS3	COL14A1	1	-0.0751971013142128
ADAMTS3	DCLK1	1	-0.0062158867675842205
ADAMTS3	DIRAS3	1	-0.0453804621956102
ADAMTS3	FBXO2	1	-0.0448104034745627
ADAMTS3	HLF	1	-0.00803657111693333
ADAMTS3	IGFBP6	1	-0.0756929620101052
ADAMTS3	KCNJ2	1	-0.124690485808047
ADAMTS3	KCNK2	1	-0.0826735389660288
ADAMTS3	KCNMA1	1	-0.0708129385536332
ADAMTS3	LSAMP	1	-0.0728371041461643
ADAMTS3	MEIS1	1	-0.061070969836813
ADAMTS3	MPP6	1	-0.0190309057685758
ADAMTS3	NDP	1	-0.12507358111744502
ADAMTS3	NPY2R	1	-0.12794373775432802
ADAMTS3	NTN1	1	-0.0618494718222224
ADAMTS3	PAPPA2	1	-0.17977878935841102
ADAMTS3	RIMS4	1	-0.153917800560776
ADAMTS3	RSPO4	1	-0.0572385161026388
ADAMTS3	SERTM1	1	-0.033919198195202
ADAMTS3	SFRP4	1	-0.0315060024525482
ADAMTS3	SORCS2	1	-0.0858906960879036
ADAMTS3	SPEF2	1	-0.0331906923418755
ADAMTS3	SYNE1	1	-0.0161487046304962
ADAMTS3	TMEM237	1	-0.0118997765777269
ADAMTS3	VEPH1	1	-0.0710260509217176
ADAMTS3	WNT9A	1	-0.0135022960310974
ADAMTS5	NOVA1	1	-0.0293936682673146
ADAMTS5	PIGT	1	-0.009921219433132391
ADAMTS9	AKAP12	1	-0.0142595327835376
ADAMTS9	MPZL2	1	-0.000119171855456231
ADAMTS9	NDRG1	1	-0.00667675964047508
ADAMTS9	STARD3	1	0.0746908993069849
ADAMTSL1	ADAMTSL4	1	-0.009139588385563441
ADAMTSL1	DCLK1	1	-0.0811896925270253
ADAMTSL1	FGF10	1	-0.0500474531836884
ADAMTSL1	GAS1	1	-0.0323470899164455
ADAMTSL1	GFPT2	1	-0.0158762820725882
ADAMTSL1	IGFBP5	1	-0.014774118747075
ADAMTSL1	KCNJ2	1	-0.0387438646957398
ADAMTSL1	LSAMP	1	-0.0282499632271469
ADAMTSL1	MRC2	1	-0.0359461584011628
ADAMTSL1	NDP	1	-0.0011115536673993699
ADAMTSL1	NTN1	1	-0.00034332736494604597
ADAMTSL1	OGN	1	-0.0069539893582319205
ADAMTSL1	PAPPA2	1	-0.0210197862224117
ADAMTSL1	PCDHGC3	1	-0.00470012075311064
ADAMTSL1	PTGFR	1	-0.0454158513649599
ADAMTSL1	RP11-1070N10.3	1	-0.00225191552843894
ADAMTSL1	SFRP4	1	-0.0217259036025504
ADAMTSL1	WNT9A	1	-0.0566411867440302
ADAMTSL4	BIN1	1	-0.00693153734566656
ADAMTSL4	C11orf89	1	-0.023418749513608
ADAMTSL4	CFD	1	-0.007055939281260209
ADAMTSL4	CORO2B	1	-0.0407124640060108
ADAMTSL4	FNDC5	1	-0.0042436500996141
ADAMTSL4	FRZB	1	0.016737374440214
ADAMTSL4	GABRE	1	-0.00305654092686647
ADAMTSL4	GALNT12	1	-0.0310294006577726
ADAMTSL4	GFPT2	1	-0.150747306108006
ADAMTSL4	IGIP	1	-0.0548936330445234
ADAMTSL4	IRF4	1	-0.0239434635265079
ADAMTSL4	LRP1	1	-6.66654112208322e-05
ADAMTSL4	PLA2G2A	1	-0.00473390218837254
ADAMTSL4	PPAP2B	1	-0.0387233751895174
ADAMTSL4	SCARA5	1	-0.0406769482788589
ADAMTSL4	TUB	1	-0.0263686008293484
ADAMTSL4	WNT9A	1	-0.0939369879380082
ADAMTSL5	CAPN6	1	-0.0440167737699808
ADAMTSL5	PLAGL1	1	-0.00972516866390781
ADAMTSL5	PLK5	1	-0.0556182734381616
ADAP1	C1QA	1	-0.0223845131570031
ADAP1	C1QB	1	-0.0360159111020759
ADAP1	C1QC	1	-0.00443181874253315
ADAP1	RELT	1	-0.00167969615193691
ADAP1	RNASE6	1	-0.0176016555920718
ADAP1	TYROBP	1	-0.0072357768590014795
ADAR	C1orf122	1	0.0407211287947656
ADAR	CDK12	1	-0.0158005790900439
ADAR	CMPK2	1	-0.0992515704695833
ADAR	CMTR1	1	-0.04091642056232799
ADAR	DGCR8	1	-0.0192819936880754
ADAR	IFIH1	1	-0.101958794361568
ADAR	IFIT2	1	-0.0035451173824501397
ADAR	MX1	1	-0.0523094766208162
ADAR	PRIMPOL	1	0.0112255867139977
ADAR	RP11-1055B8.7	1	-0.102879225509378
ADAR	SLC19A2	1	0.00593728899095022
ADAR	SPATA6	1	0.0145267820841426
ADAR	STAT1	1	-0.0488977303045042
ADAT2	CCNT2	1	-0.0194893772076074
ADAT2	CLN6	1	-0.0011801927176601302
ADAT2	EARS2	1	-0.0468140222768033
ADAT2	FOXO4	1	0.00406025446550307
ADAT2	IARS	1	-0.0215810613057524
ADAT2	MTR	1	-0.0195784084544656
ADAT2	MXI1	1	0.0124381862871425
ADAT2	NME1	1	-0.0077845784908117
ADAT2	RP11-1105G2.3	1	-0.0694149070236181
ADAT2	SENP6	1	-0.0134054318597545
ADAT2	TARBP1	1	-0.129764659913161
ADAT2	TCERG1	1	-0.009707551526585971
ADAT2	TRMT13	1	-0.022568519225668
ADAT2	ZNF337	1	-0.0279558400430376
ADC	SPARCL1	1	0.0255129571388222
ADC	UBXN1	1	-0.0119827766159459
ADC	WDTC1	1	-0.0270987267525697
ADCK4	FAM20C	1	-0.0392101113570921
ADCK4	FLOT2	1	-0.00345280452961656
ADCK4	MINK1	1	-0.00674223522184268
ADCK4	MVP	1	-0.115979444984746
ADCK4	SLC39A1	1	-0.0765132219779294
ADCY1	C1orf173	1	-0.09249184111010801
ADCY1	CHST8	1	-0.0528897659969729
ADCY1	CITED1	1	-0.0564965466892801
ADCY1	DNAI1	1	-0.0567973298531839
ADCY1	NPY1R	1	-0.0364625303090595
ADCY1	PPP4R4	1	-0.087379877735583
ADCY1	PREX1	1	-0.0473296754536241
ADCY1	SCGB3A1	1	-0.0471615521940663
ADCY1	SERPINA6	1	-0.0449523594850322
ADCY1	TMEM26	1	-0.0031941484690638697
ADCY2	AMPH	1	-0.0433410994175497
ADCY2	B3GALTL	1	-0.00575788420722094
ADCY2	CADPS	1	-0.0162767014399534
ADCY2	FGF10	1	-0.0320553451697654
ADCY2	GALNT13	1	-0.0155334684956305
ADCY2	GAS1	1	-0.0108795223215379
ADCY2	GREB1L	1	-0.00837226965587763
ADCY2	KCNK2	1	-0.152847349041345
ADCY2	LSAMP	1	-0.0298027100643295
ADCY2	PDZRN4	1	-0.00359408307806472
ADCY2	RAI2	1	-0.0214755391695998
ADCY2	SRC	1	-0.0146572968396797
ADCY3	ANKRD10	1	-0.00469536180827186
ADCY3	EGFLAM	1	-0.0163275283435702
ADCY3	PREX2	1	-0.0359092663728949
ADCY3	PTP4A3	1	-0.0122883990516277
ADCY3	PYGM	1	-0.00933329520498225
ADCY3	STON1	1	-0.00918378950970718
ADCY4	ARHGAP31	1	-0.0680028620902355
ADCY4	C10orf128	1	-0.00805212639707543
ADCY4	C10orf2	1	-0.048169665386717006
ADCY4	CASKIN2	1	-0.0301091490857003
ADCY4	CCM2L	1	-0.0532541138407962
ADCY4	CPNE8	1	-0.0118917808571496
ADCY4	DDRGK1	1	0.0299602422337571
ADCY4	EPHB4	1	-0.0281793183683017
ADCY4	FAM65A	1	-0.0479782196944102
ADCY4	FLI1	1	-0.036318404959955
ADCY4	GATAD2B	1	0.005261661444826329
ADCY4	GIMAP6	1	-0.0171112535223616
ADCY4	IFRD1	1	0.0258571560101753
ADCY4	KIF26A	1	-0.00278828494001743
ADCY4	NOVA2	1	-0.0587549011652647
ADCY4	OSER1	1	0.0240306049989173
ADCY4	RIPK3	1	-0.134507471378432
ADCY4	SH2D3C	1	-0.131533044437107
ADCY4	TAOK2	1	-0.168201756476119
ADCY4	TEK	1	-0.0111886814574499
ADCY4	TP53BP1	1	0.006147480156839001
ADCY4	UBP1	1	-0.000154566903460412
ADCY5	ADRA2A	1	-0.0830124158679203
ADCY5	BLCAP	1	-0.00533897486307786
ADCY5	C1QTNF1	1	-0.0167846600857084
ADCY5	CCDC3	1	-0.0766676715855159
ADCY5	CTNNB1	1	-0.061161270900405997
ADCY5	EDNRA	1	-0.0591450543318692
ADCY5	FRMD4A	1	-0.00112077332367022
ADCY5	ID4	1	-0.0739991852986353
ADCY5	JAG1	1	-0.0206151517347062
ADCY5	KIRREL	1	-0.0305820468171198
ADCY5	KLHL25	1	-0.0279505868631398
ADCY5	MAOB	1	-0.0159585289318326
ADCY5	MGAT3	1	-0.0308858339480511
ADCY5	MICAL2	1	-0.00520323104340244
ADCY5	NTF3	1	-0.0313167489810467
ADCY5	OXCT1	1	-0.008062545773723279
ADCY5	PARVA	1	-0.0111145248847129
ADCY5	PEX5	1	-0.0426316461172761
ADCY5	PHLDA3	1	-0.161558200655813
ADCY5	PJA1	1	-0.0432677916193343
ADCY5	PPP1R14A	1	-0.0795289714847831
ADCY5	PPP2R2B	1	-0.0276810525797702
ADCY5	PRDM16	1	-0.072292279296516
ADCY5	RAB6B	1	-0.0790110067463046
ADCY5	SIDT2	1	-0.018717872775993
ADCY5	SMAD6	1	-0.046815690041795
ADCY5	SMAD7	1	-0.0438587694278094
ADCY5	SORBS1	1	-0.152504639497318
ADCY5	SUN2	1	-0.0617094204910812
ADCY5	SYNE3	1	-0.004072870438379021
ADCY5	TMBIM1	1	-0.0132468606384728
ADCY7	CSF1R	1	-0.0190808225066905
ADCY7	FMNL1	1	-0.00243801797790755
ADCY7	IL10RA	1	-0.12087547416016803
ADCY7	ITGAM	1	-0.0415144133663044
ADCY7	NCKAP1L	1	-0.0610398467982758
ADCY7	PIK3R5	1	-0.0460796050381552
ADCY7	TFEC	1	-0.036915464822992
ADCYAP1	HDC	1	-0.0430064218850717
ADCYAP1R1	CXCL14	1	-0.0623837776968566
ADD1	CXCR5	1	-0.0148175811959655
ADD1	DST	1	-0.0223525962912943
ADD1	FLNA	1	-0.0632095140335821
ADD1	GAK	1	-0.0165925111546761
ADD1	GTF3C1	1	-0.0393133754377237
ADD1	HDLBP	1	-0.0117906909226549
ADD1	KLC1	1	-0.043117497773997995
ADD1	LDB1	1	0.0920758537979789
ADD1	SMCR8	1	0.0389673050455757
ADD1	TLN1	1	-0.00261000847403659
ADD1	TMEM109	1	-0.0491628081198569
ADD3	COL1A2	1	-0.0667178305828054
ADD3	DCLK1	1	-0.0539336961177848
ADD3	FAM110D	1	0.0493425762141952
ADD3	FIGF	1	-0.00706305996852514
ADD3	LPAR1	1	-0.00703507098679251
ADD3	LRIG3	1	-0.0034870107123560396
ADD3	MMP2	1	-0.0223659764493145
ADD3	SNCG	1	0.0990027708654712
ADHFE1	DCUN1D4	1	-0.0541288978293386
ADHFE1	SGCG	1	-0.0215408051761994
ADIPOR2	FBXO31	1	-0.0532947778636102
ADIPOR2	GPAM	1	-0.0523461204817319
ADIPOR2	PRRT4	1	-0.0183110679622081
ADIPOR2	SLC19A1	1	-0.00892048131481764
ADIPOR2	THRSP	1	-0.0360525705447188
ADIRF	ADRA2A	1	-0.000770372646281867
ADIRF	CCDC107	1	-0.0508764452111459
ADIRF	FAM89A	1	-0.0319875659967998
ADIRF	ITGA7	1	-0.00169535730876267
ADIRF	KCNIP2	1	-0.006578327784159999
ADIRF	LGALS1	1	-0.0020690996472251103
ADIRF	NMB	1	-0.0194056701832199
ADIRF	PNPLA2	1	-0.0924217979888036
ADIRF	RRAS	1	-0.0568290710115179
ADIRF	SNCG	1	-0.0562195432348207
ADM	GPX3	1	-0.0559030869910208
ADM	LAMC1	1	-0.0693162217715852
ADM	PLXNA4	1	-0.0100537542033744
ADM	SLC43A1	1	-0.0020318059279417
ADM	SVEP1	1	-0.167042685067542
ADM	THBS2	1	-0.0484126079476642
ADM5	BACE2	1	-0.0160007160859963
ADM5	CFI	1	-0.0133571274131544
ADM5	CMIP	1	-0.0274700308061216
ADM5	CYTL1	1	-0.0438649727700694
ADM5	DARC	1	-0.130860103945037
ADM5	ENDOU	1	-0.0100499324024533
ADM5	FAM110D	1	-0.0502546387613135
ADM5	FAM13C	1	-0.0803496939887137
ADM5	GIMAP8	1	-0.0029561475200352
ADM5	GPR68	1	-0.103339926297467
ADM5	IFITM1	1	-0.0554241382156338
ADM5	KLHL3	1	-0.0855814060704035
ADM5	MKL2	1	-0.0287141650093225
ADM5	OLFM1	1	-0.0133902533358337
ADM5	SULF2	1	-0.0111481084918741
ADM5	TACR1	1	-0.00453926836262333
ADM5	THSD7A	1	-0.0260685328106292
ADM5	TMEM255B	1	-0.0461412755301866
ADM5	WSCD1	1	-0.0458947375361606
ADM5	ZNF385D	1	-0.011747879507191002
ADORA1	ATL2	1	-0.0323155748008084
ADORA1	DGAT1	1	-0.0687780768063885
ADORA1	LRIG1	1	-0.0971439322036392
ADORA1	MRAS	1	-0.0315935290000983
ADORA1	PPP2R5A	1	-0.0395365516706774
ADORA1	RMDN3	1	-0.0249530873010734
ADORA1	SLC16A7	1	-0.034842884325474
ADORA1	SLC25A22	1	-0.0588773501743887
ADORA1	SLC31A2	1	0.0282541100546904
ADORA1	SLC4A4	1	-0.0117767555371013
ADORA1	SREBF1	1	-0.12017044628179599
ADORA2A	LZTS2	1	-0.00539227037721237
ADORA3	ARHGDIB	1	-0.0111041656695904
ADORA3	C1orf162	1	-0.144124415559389
ADORA3	DOK2	1	-0.0353411434914908
ADORA3	MYO9B	1	-0.005460768774579371
ADORA3	NPL	1	-0.0797478683409555
ADORA3	PIK3R5	1	-0.0456637433537973
ADORA3	PYCARD	1	-0.0207198188676281
ADORA3	RNASE6	1	-0.0884620696336171
ADORA3	SLA	1	-0.0375831721853465
ADORA3	TBXAS1	1	-0.00315483488314111
ADORA3	VSIG4	1	-0.0837424098786248
ADPRM	CBX6	1	0.00978385122361804
ADRA2A	CCDC3	1	-0.0433504968706906
ADRA2A	EDNRA	1	-0.0119018625816066
ADRA2A	EGFLAM	1	-0.00814147463616341
ADRA2A	ESYT1	1	-0.0084601543213542
ADRA2A	JAG1	1	-0.00294804745843317
ADRA2A	KIRREL	1	-0.0562633053097969
ADRA2A	MGAT3	1	-0.19051652938274
ADRA2A	PEX5	1	-0.0664076031865033
ADRA2A	PHLDA3	1	-0.004626238143738711
ADRA2A	RGS3	1	-0.0255343199569384
ADRA2A	ZEB2	1	-0.0011525641546489302
ADRA2B	DENND3	1	-0.0035399947674841204
ADRA2C	ATP2A3	1	-0.016513371168461
ADRA2C	C11orf96	1	-0.0108787304895779
ADRA2C	CACNA1H	1	-0.0141553887568995
ADRA2C	CASKIN2	1	-0.0298109604792728
ADRA2C	DAB2IP	1	-0.102873198054467
ADRA2C	DCN	1	0.0165124424183246
ADRA2C	EPHB4	1	-0.0150928363133288
ADRA2C	ID1	1	-0.032364071705443996
ADRA2C	ITGA8	1	-0.0197145220979069
ADRA2C	JAG2	1	-0.0292310720638922
ADRA2C	MYL9	1	-0.06359385115928799
ADRA2C	PDZD4	1	-0.0194231065054686
ADRA2C	PRDM16	1	-0.0196051675100803
ADRA2C	PRR7	1	-0.0504742991028978
ADRA2C	SMAD6	1	-0.007446165826661609
ADRA2C	SORBS2	1	-0.0219037328075258
ADRA2C	TLE2	1	-0.00640717485573606
ADRB1	FRMD1	1	-0.0755732732912524
ADRB1	GLYAT	1	-0.0074345084051886294
ADRB1	NAT8L	1	-0.00252814407843543
ADRB1	RAB20	1	-0.0141508757283115
ADRB1	ZNF664	1	0.00412983085746362
ADRB2	AIF1L	1	-0.0569132957686227
ADRB2	APOLD1	1	-0.0167822448224658
ADRB2	ARHGAP29	1	-0.00284197693120967
ADRB2	CASKIN2	1	-0.0369193885553172
ADRB2	CCRL2	1	-0.131618486744514
ADRB2	CD36	1	-0.0507811767640149
ADRB2	FABP4	1	-0.0168700026386096
ADRB2	FRMD3	1	-0.0345090024931189
ADRB2	GNAI1	1	-0.0864732910017626
ADRB2	GNAZ	1	-0.15934333853816102
ADRB2	KLF11	1	-0.0104435665866515
ADRB2	MGAT1	1	-0.000953406650657667
ADRB2	NOSTRIN	1	-0.0614596813888475
ADRB2	PALMD	1	-0.0726066949426207
ADRB2	PARM1	1	-0.0219873295356446
ADRB2	PDK4	1	-0.0735770562538841
ADRB2	RASIP1	1	-0.0551811153302239
ADRB2	RILP	1	-0.11173921104985
ADRB2	SCN4A	1	-0.176418934164005
ADRB2	SIK1	1	-0.0429997710897394
ADRB2	SNAI1	1	-0.0237617496664103
ADRB2	TCF15	1	-0.049859116473295
ADRBK1	ANKRD13D	1	-0.020178521930981998
ADRBK1	ARMC7	1	-0.0186901107585556
ADRBK1	CST3	1	0.00709601779928072
ADRBK1	EDA2R	1	0.0232642156527477
ADRBK1	FAM213B	1	-0.11274089685867698
ADRBK1	FSTL1	1	0.0272563935505343
ADRBK1	LRCH4	1	-0.0856722850329256
ADRBK1	LZTS2	1	-0.000663522349725162
ADRBK1	NCDN	1	0.0037300607251231897
ADRBK1	OXCT1	1	0.00517032510541505
ADRBK1	PTMS	1	0.00268187090914094
ADRBK1	SSH3	1	-0.0760233821708475
ADRBK1	TBC1D10C	1	-0.0150047712655048
ADRBK1	TCF7L2	1	0.00248580261742297
ADRM1	ATP13A2	1	-0.009627510307013741
ADRM1	BCL7B	1	-0.000815724883320941
ADRM1	C12orf44	1	-0.0234016596649143
ADRM1	CASKIN2	1	-0.00630043156116645
ADRM1	COPZ1	1	0.0368756649343969
ADRM1	FURIN	1	-0.000332428179871488
ADRM1	KDM6B	1	-0.0308065009954519
ADRM1	MGEA5	1	0.0810203898549424
ADRM1	PUSL1	1	-0.0625194489294463
ADRM1	RASIP1	1	-0.0168486436309277
ADRM1	SCAND1	1	-0.0616159258507308
ADRM1	SLC52A2	1	-0.0338593500057134
ADRM1	SSNA1	1	-0.0186373930069736
ADRM1	TCF15	1	-0.0397830932477812
ADRM1	THAP7	1	-0.00158892274629153
ADRM1	XPO1	1	0.0666912946128802
ADRM1	ZBTB40	1	-0.0197959580813286
ADRM1	ZNF853	1	-0.0334697584341421
ADTRP	SLC27A6	1	-0.0553922293306934
AEBP1	BOC	1	-0.0198816183217739
AEBP1	COL14A1	1	-0.0217420716573802
AEBP1	CTSK	1	-0.0872564370483457
AEBP1	EZR	1	0.00930938671710276
AEBP1	ISLR	1	-0.0446690334421977
AEBP1	KIAA1755	1	-0.0595337608624624
AEBP1	MAP1A	1	-0.0207922526293707
AEBP1	MEIS1	1	-0.0031944229011200004
AEBP1	NT5E	1	-0.0878926508884143
AEBP1	OGN	1	-0.13317159973167803
AEBP1	RECK	1	-0.0018974183747021102
AEBP1	SFRP2	1	-0.0185175074375496
AEBP1	SLC43A3	1	-0.0717654877994847
AEBP1	THBS2	1	-0.0521670485560091
AEBP1	TIMP2	1	-0.122839733892031
AEBP1	TPBG	1	-0.00338655979849981
AEN	C12orf44	1	-0.0138419146861455
AEN	CASKIN2	1	-0.00342009823006223
AEN	CBX6	1	-0.009376839713581091
AEN	CBX7	1	-0.00797934897464892
AEN	CEP57	1	0.0571687980036652
AEN	IFRD2	1	-0.0369982451848527
AEN	KDM6B	1	-0.0424548461216197
AEN	KLF11	1	-0.0229252707701405
AEN	NFATC2	1	-0.0437523297192759
AEN	PHF3	1	0.0656073665569583
AEN	PPRC1	1	-0.137566991278156
AEN	SPATA2L	1	-0.0830077073126439
AEN	ZMYM3	1	0.0212008348339659
AES	PTMS	1	-0.0315767555434665
AES	TLE2	1	-0.066351330000488
AFAP1L1	EFCC1	1	-0.0246133830809923
AFAP1L1	PEAR1	1	-0.0242523204608788
AFAP1L2	CCDC178	1	-0.0007528511301792969
AFAP1L2	CD34	1	-0.00267869933477918
AFAP1L2	GUCY1B3	1	-0.0009469517193934039
AFAP1L2	ITGB4	1	-0.013912967815978998
AFAP1L2	LIFR	1	-0.039219926329032005
AFAP1L2	LPCAT4	1	-0.0129664923818548
AFAP1L2	LSR	1	-0.0655057125368851
AFAP1L2	MKL2	1	-1.59215443897853e-05
AFAP1L2	NTN4	1	-0.000240145130258298
AFAP1L2	PTPRK	1	-0.0291516149327143
AFF4	BAIAP2	1	-0.0468977969399246
AFF4	ELF1	1	-0.0806405809689205
AFF4	EML3	1	0.10500794897535902
AFF4	HHEX	1	0.0245627242777844
AFF4	NFIL3	1	-0.00207225031835247
AFF4	NR4A3	1	-0.0206890289170453
AFF4	TACC1	1	-0.0120056723503837
AFP	ALB	1	-0.0695846225458618
AFP	ST8SIA2	1	-0.0153041755681835
AFTPH	FKBP10	1	0.06819232112193499
AFTPH	GPR173	1	0.0119277826252055
AFTPH	KIF13B	1	-0.0490317384257375
AFTPH	TRIM9	1	0.0314900598519688
AGAP2	RGS5	1	-0.12079699337025199
AGAP2	SCN4B	1	-0.00598559631088535
AGAP2	THBS4	1	-0.0297313412081266
AGAP2	VIPR1	1	-0.0557814821161653
AGAP3	CLMP	1	-0.0143377031020314
AGAP3	HSPA12A	1	-0.0130077523921586
AGAP3	KLC2	1	-0.0129263108825468
AGAP3	MRAS	1	-0.0136314971347354
AGFG1	ARHGAP30	1	-0.0382491788609921
AGFG1	C1orf162	1	-0.00537332387134625
AGFG1	GNA15	1	-0.00713135721787318
AGFG1	GPR183	1	-0.0288335839691011
AGFG1	H2AFJ	1	-0.0124664870735009
AGFG1	NCKAP1L	1	-0.0345936899878923
AGFG1	STXBP2	1	-5.59548443703761e-05
AGFG1	VSIG4	1	-0.00703334722318495
AGFG2	LRMP	1	-0.00915003973756597
AGFG2	PML	1	-0.0166955121478049
AGFG2	TMEM255B	1	-0.035417873370011003
AGO2	ARL4C	1	-0.00165134975301493
AGO2	ATXN7	1	-0.0196884663621342
AGO2	EML3	1	0.0184007635381811
AGO2	FANCL	1	0.0635600434140255
AGO2	SESTD1	1	-0.009475051524312059
AGO4	CTSZ	1	-0.0161072225412088
AGPAT2	ALDH1L1	1	-0.0183806786993823
AGPAT2	ALDH2	1	-0.0654254011909522
AGPAT2	C14orf180	1	-0.23493217208061398
AGPAT2	CALB2	1	-0.00319642056291143
AGPAT2	CDKN2B	1	-0.00040867224964583103
AGPAT2	DGAT2	1	-0.11474470347532302
AGPAT2	DMKN	1	-0.0302887575916484
AGPAT2	FAM47E-STBD1	1	-0.0693577349746257
AGPAT2	FAM89A	1	-0.0426941995068367
AGPAT2	FBXO2	1	-0.0140020774378991
AGPAT2	G0S2	1	-0.0104262854949058
AGPAT2	GPAM	1	-0.108578262133966
AGPAT2	GPBAR1	1	-0.0573902014002992
AGPAT2	GPD1	1	-0.0125078452385064
AGPAT2	GYG2	1	-0.0570592954048489
AGPAT2	HEPACAM	1	-0.0477058340970843
AGPAT2	HSPB7	1	-0.00267175269436575
AGPAT2	ITGA7	1	-0.0407176147856759
AGPAT2	LGALS12	1	-0.0456993717751836
AGPAT2	MARC1	1	-0.14873387409634803
AGPAT2	MRAP	1	-0.21478469177060802
AGPAT2	NAT8L	1	-0.11653164298738901
AGPAT2	NMB	1	-0.0927869824594485
AGPAT2	PC	1	-0.10187149010660401
AGPAT2	PCK1	1	-0.00144273098490882
AGPAT2	PDE3B	1	-0.0255267028097041
AGPAT2	PDLIM4	1	-0.0449713338180002
AGPAT2	PFKFB1	1	-0.139255728747776
AGPAT2	PFKFB3	1	-0.0018238444276729602
AGPAT2	PLIN1	1	-0.070047516408437
AGPAT2	PNPLA2	1	-0.128344942578763
AGPAT2	RBP4	1	-0.10222475167131301
AGPAT2	SRCRB4D	1	-0.0449986409376987
AGPAT2	TUSC5	1	-0.0441207309729914
AGPAT2	YWHAG	1	-0.0130382281995432
AGPAT9	AMN	1	-0.104814328503027
AGPAT9	ANKRD53	1	-0.0271496876709351
AGPAT9	ANO6	1	-0.0579874281230274
AGPAT9	ASPG	1	-0.00893252974717284
AGPAT9	CABLES1	1	-0.0054885506686309605
AGPAT9	CDKN2C	1	-0.0288997677779301
AGPAT9	CLUH	1	-0.0259908002054277
AGPAT9	CRLS1	1	-0.0344951076794347
AGPAT9	DMRT2	1	-0.0323833876819747
AGPAT9	DNAH9	1	-0.0958211197002735
AGPAT9	DTX1	1	-0.0780663657594299
AGPAT9	EDN1	1	0.0337444652888261
AGPAT9	ELOVL3	1	-0.11829344901650998
AGPAT9	FAM47E-STBD1	1	-0.007395644413409629
AGPAT9	FAM89A	1	-0.0470654470480707
AGPAT9	GLIS1	1	-0.0198030390884565
AGPAT9	GLYCTK	1	-0.065851848658002
AGPAT9	NT5E	1	-0.0780245642576365
AGPAT9	ORMDL3	1	-0.0335284477731628
AGPAT9	PCBD1	1	-0.0875091552833017
AGPAT9	PFDN2	1	-0.00611800332625313
AGPAT9	PGRMC1	1	-0.0609591363447648
AGPAT9	PMM1	1	-0.060376100901266
AGPAT9	PRR5L	1	-0.0533298602889469
AGPAT9	SH3PXD2A	1	-0.0343089259713724
AGPAT9	SLC27A2	1	-0.0999175698636522
AGPAT9	SLC2A4RG	1	-0.0158344729158888
AGPAT9	SLC7A10	1	-0.0721948669977753
AGPAT9	SURF4	1	-0.0150484707345796
AGPAT9	TMEM132C	1	-0.0738670278764083
AGPAT9	TTC36	1	-0.047870584059484
AGR2	AGR3	1	-0.387650585726591
AGR2	CACNG4	1	-0.034117744454187
AGR2	CAPN8	1	-0.129681542769511
AGR2	CELSR1	1	-0.0793645349269382
AGR2	EPCAM	1	-0.0683187621199129
AGR2	FOXA1	1	-0.116735507227398
AGR2	IGSF9	1	-0.015822197882744
AGR2	KIF12	1	-0.0354569315858518
AGR2	LYPD6	1	-0.0031690719311575303
AGR2	MAGED2	1	-0.00362189969359064
AGR2	MYB	1	-0.102045997383625
AGR2	PI15	1	-0.0439970088153259
AGR2	S100A14	1	-0.0433289481862489
AGR2	SLC39A6	1	-0.0926183806165299
AGR2	SMIM22	1	-0.0594353090929635
AGR2	SPDEF	1	-0.0805274900073628
AGR2	SPINT2	1	-0.0030544556175119
AGR2	TFF1	1	-0.0423526902845407
AGR2	THSD4	1	-0.0212084013531392
AGR2	TTC39A	1	-0.0595663057434932
AGR2	VSIG2	1	-0.0121340474281425
AGR2	XBP1	1	-0.0022232169159697303
AGR2	ZNF703	1	-0.0383813089798403
AGR3	CACNG4	1	-0.0035388968697404
AGR3	CAPN8	1	-0.00504098805922217
AGR3	CELSR1	1	-0.056888129319931
AGR3	CT62	1	-0.00639664612478621
AGR3	DEGS2	1	-0.0111596100139283
AGR3	EPCAM	1	-0.00340128383890895
AGR3	FANK1	1	-0.0112301077112461
AGR3	MYB	1	-0.139038102945724
AGR3	PGR	1	-0.0589075496259253
AGR3	PKIB	1	-0.0373608060426459
AGR3	PREX1	1	-0.0218805216761542
AGR3	RALGPS2	1	-0.0410499984320139
AGR3	SLC39A6	1	-0.0791035878735692
AGR3	TBC1D9	1	-0.0525139351019882
AGR3	THSD4	1	-0.11917689282312802
AGR3	TMEM26	1	-0.0757484760286275
AGR3	TTC39A	1	-0.0188954238887907
AGR3	XBP1	1	-0.0123722659734545
AGRN	ANO1	1	-0.10062774217827901
AGRN	CASZ1	1	-0.0421996371577133
AGRN	CDC42BPG	1	-0.06975568516903098
AGRN	CELSR2	1	-0.0279146398561011
AGRN	CPNE2	1	-0.0225824498457254
AGRN	DAB2IP	1	-0.08107735452954598
AGRN	DGCR2	1	-0.0139329329087502
AGRN	ENTPD2	1	-0.00581521293775326
AGRN	FAM213B	1	-0.0737353202985164
AGRN	GAS2L1	1	-0.0173973255852974
AGRN	ISG15	1	-0.007644215256932591
AGRN	ITGB4	1	-0.0242156450972401
AGRN	KIAA1522	1	-0.155009876144578
AGRN	LAD1	1	-0.0380405831042053
AGRN	LLGL2	1	-0.0028036972056168803
AGRN	LSR	1	-0.0676770949676432
AGRN	LY6E	1	-0.023609307234483
AGRN	NIPAL3	1	-0.0328993912359754
AGRN	RIPK4	1	-0.0129638185872365
AGT	SPON2	1	-0.0085606588166747
AGTR1	COL6A3	1	-0.0268606311345757
AGTR1	LRRC17	1	-0.00691794042528948
AGTRAP	BBS4	1	-0.0224623821944797
AGTRAP	DGCR8	1	0.0366453531571693
AGTRAP	GBP2	1	-0.0256435612324239
AGTRAP	GNB2	1	-0.0222199593026303
AGTRAP	KIAA1107	1	-0.0298465448432519
AGTRAP	LAMTOR2	1	-0.0478486625609899
AGTRAP	MAD2L2	1	-0.0524952792175227
AGTRAP	MAP3K8	1	-0.0343731311388327
AGTRAP	NHLRC3	1	-0.0037304769012433
AGTRAP	PIK3IP1	1	-0.0492892831693816
AGTRAP	SF1	1	0.00516293858833895
AGTRAP	TYMP	1	-0.0287067131212517
AGTRAP	VPS25	1	-0.0957893061195522
AGTRAP	YIPF1	1	-0.0689064278548831
AHDC1	BCL9L	1	-0.0863941562874031
AHDC1	CBLB	1	0.0547831493513357
AHDC1	CTDSPL	1	-0.0317676356261804
AHDC1	DGCR2	1	-0.0464037956019116
AHDC1	ERF	1	-0.0243391641100459
AHDC1	GAS2L1	1	-0.0535788213424671
AHDC1	LRRC8A	1	-0.00269759343545863
AHDC1	MKL1	1	-0.00461483346853942
AHDC1	NOTCH1	1	-0.0288369511467188
AHDC1	PLEC	1	-0.0155694661539856
AHDC1	PUSL1	1	-0.0208300911119685
AHDC1	RNF149	1	0.0508821740454994
AHDC1	SOX13	1	-0.0129166996176399
AHDC1	STXBP2	1	0.00900174280466587
AHDC1	VSIG4	1	0.004547728261255339
AHDC1	ZBTB7C	1	-0.0342290981981371
AHRR	CYP1A1	1	-0.133013606720576
AHSA1	DNAJA4	1	-0.0909619191150559
AHSA1	HNRNPA2B1	1	-0.009834610153359371
AHSA1	HNRNPH3	1	-0.011689593998583001
AHSA1	HNRNPM	1	-0.024008058520959996
AHSA1	OXLD1	1	0.009365855851321379
AHSA1	RBM14	1	-0.0637937465183081
AHSA1	SMG9	1	-0.00325386697459291
AHSA1	TMEM219	1	0.015436423126042001
AIF1	BLNK	1	-0.0147568953775358
AIF1	C1QB	1	-0.0650712132270758
AIF1	C1QC	1	-0.0681643164773998
AIF1	C1orf162	1	-0.134604534582955
AIF1	CD4	1	-0.0325369143293701
AIF1	CLEC10A	1	-0.0165008777591002
AIF1	CYBB	1	-0.13565817088332302
AIF1	DOCK2	1	-0.0658759464832841
AIF1	DOK2	1	-0.0402461580830657
AIF1	DOK3	1	-0.0178289768859472
AIF1	EBI3	1	-0.050830392356746995
AIF1	F13A1	1	-0.20331848702381197
AIF1	FGD3	1	-0.000844042079286109
AIF1	GNA15	1	-0.11763944799422699
AIF1	HCK	1	-0.125772960267713
AIF1	HK3	1	-0.0801365398530216
AIF1	HNMT	1	-0.0791898388570108
AIF1	LST1	1	-0.17795861136809402
AIF1	LY86	1	-0.0303069336504413
AIF1	MNDA	1	-0.0175152447971334
AIF1	MYO7A	1	-0.000918711518649362
AIF1	NCKAP1L	1	-0.0427745238970924
AIF1	NCS1	1	0.0218784547405685
AIF1	PLB1	1	-0.0741538495433037
AIF1	PLEK	1	-0.0209620436181644
AIF1	S100A9	1	-0.012507911355697999
AIF1	SPI1	1	-0.0731509214012438
AIF1	STAB1	1	-0.00252809299949444
AIF1	STAC3	1	-0.0517472989803161
AIF1	VAMP8	1	-0.0221413672890505
AIF1	WAS	1	-0.0714733262770543
AIF1L	ARNT	1	0.00582317362932605
AIF1L	ATP13A2	1	-0.0591181977485094
AIF1L	ATP9A	1	0.00311209396589978
AIF1L	CA4	1	-0.0178186959293004
AIF1L	CALM1	1	-0.0121517967044764
AIF1L	CAMK2D	1	0.0132105586354266
AIF1L	CD63	1	0.00566890327479654
AIF1L	CHST2	1	-0.00190793164571347
AIF1L	CLIP4	1	0.037337069980076
AIF1L	CPNE2	1	-0.08391384385912401
AIF1L	CTSA	1	0.00764405794050163
AIF1L	DAGLA	1	-0.0536452304312727
AIF1L	EFNB1	1	-0.0128743951978085
AIF1L	FGF12	1	-0.0267186309564384
AIF1L	FRMD3	1	-0.123168107623812
AIF1L	GNAZ	1	-0.08872690849888198
AIF1L	GPR56	1	-0.0295772698193286
AIF1L	GRINA	1	0.0764111298723924
AIF1L	HEG1	1	-0.0586304046066917
AIF1L	HSPA12B	1	-0.000362879735124388
AIF1L	ITGA6	1	-0.00595989812081117
AIF1L	KCNAB1	1	-0.019144308823252
AIF1L	KCNK15	1	0.0574336295482333
AIF1L	KDR	1	-0.00277980510082814
AIF1L	KIAA1217	1	-0.0252324453079273
AIF1L	LMAN2L	1	0.0133397934985277
AIF1L	LRP1	1	0.0917853235377189
AIF1L	MFSD6	1	-0.0679103517722533
AIF1L	NES	1	-0.0917503905448873
AIF1L	NOSTRIN	1	-0.0305821373285953
AIF1L	NOVA2	1	-0.00248022959002611
AIF1L	NT5DC2	1	-0.0182535266924522
AIF1L	PARM1	1	-0.0405665068960473
AIF1L	PDE9A	1	-0.0560196267185438
AIF1L	PHF21A	1	0.0513322708878056
AIF1L	PHF3	1	0.00520936556946456
AIF1L	PIK3R3	1	-0.0459029324318105
AIF1L	PPP1CA	1	-0.0818318714565943
AIF1L	PPP1R16B	1	-0.0169793060344045
AIF1L	RAPGEF2	1	-0.0701791464201859
AIF1L	RNF146	1	0.0131510923958593
AIF1L	S1PR4	1	-0.0159130931010423
AIF1L	SCN4A	1	-0.0717310006168796
AIF1L	SERTAD4	1	-0.00130632613605577
AIF1L	SGK223	1	-0.0545751671293243
AIF1L	SLC52A2	1	-0.0339864889318132
AIF1L	SLC9A3R2	1	-0.21601660243582602
AIF1L	TAOK2	1	-0.0288399492341566
AIF1L	TEK	1	-0.030677487713930997
AIF1L	TSPAN12	1	-0.0135766778903128
AIF1L	TTLL10	1	-0.0233836737369655
AIM1	ARHGAP29	1	-0.0117046078336194
AIM1	CACNG4	1	-0.0206397351648802
AIM1	CDS1	1	-0.0278268070639625
AIM1	CTSV	1	-0.071314414578694
AIM1	FAM110A	1	-0.0340941275126061
AIM1	GPR87	1	-0.00756255971288302
AIM1	PRSS22	1	-0.00243738908656271
AIM1	PTN	1	-0.0134973492453515
AIM1	RASGEF1A	1	-0.0139095623401939
AIM1	RIPK4	1	-0.0512927528250329
AIM1	SLC28A3	1	-0.054360098028061
AIM1	ST14	1	-0.0596335816667868
AIM1	ST6GALNAC5	1	-0.0778534081798413
AIP	BCL7B	1	-0.00598101389673564
AIP	C12orf44	1	-0.0393252601796898
AIP	CTSF	1	-0.0448574744822494
AIP	PIAS3	1	0.0282371543304118
AIP	TMED5	1	-0.067679235381357
AIP	ZBTB21	1	-0.00517533526503568
AIP	ZHX2	1	-0.0890966167743396
AJUBA	FAT2	1	-0.0205859998572548
AJUBA	PVRL1	1	-0.0601004986596921
AJUBA	SORBS3	1	-0.0131204389097296
AK5	CDH3	1	-0.0044393670260047795
AK5	CLDN1	1	-0.0325710575814449
AK5	COL17A1	1	-0.0135798613846279
AK5	FDCSP	1	-0.0319094485874599
AK5	GPR87	1	-0.153515508202159
AK5	GRAMD2	1	-0.009005648964715141
AK5	ITGB6	1	-0.0024836102498567
AK5	LRRC4C	1	-0.0275167819442659
AK5	LTF	1	-0.0432305180232613
AK5	NTN4	1	-0.00885514513790224
AK5	PLCH2	1	-0.0160129674112811
AK5	PRSS8	1	-0.0321227723315884
AK5	PTN	1	-0.15411462778909601
AK5	RAB15	1	-0.0411080255081621
AK5	SLC28A3	1	-0.124416683323133
AK5	TMEM51	1	-0.0199973603968843
AK5	TRIM17	1	-0.0390321574458556
AK5	VAV3	1	-0.0263684667359157
AK5	VGLL1	1	-0.022000430550292004
AK5	WFDC2	1	-0.10951439960508501
AKAP1	MYH11	1	-0.0257558991883385
AKAP12	ANKRD37	1	-0.0340094200393792
AKAP12	CFL2	1	-0.00461298260677361
AKAP12	CMPK2	1	0.0135759471698772
AKAP12	DHCR24	1	-0.010989604083215001
AKAP12	DHCR7	1	-0.05336570359578201
AKAP12	ETNK2	1	-0.0617131706178643
AKAP12	FAM13C	1	0.035035231802708
AKAP12	FGFR1	1	-0.105717392081408
AKAP12	FOSL2	1	-0.0784684928559197
AKAP12	FOXO1	1	-0.0504118404671459
AKAP12	GYS1	1	-0.0525821670864153
AKAP12	NDRG1	1	-0.0349145023794618
AKAP12	NOL3	1	-0.0386120268893365
AKAP12	PARP12	1	0.0182521579953291
AKAP12	PCYT2	1	-0.0153081375091083
AKAP12	PJA2	1	-0.000605203617940683
AKAP12	PSMB8	1	0.0009241591229475211
AKAP12	PSME1	1	0.0715415429664348
AKAP12	SLC29A2	1	-0.0125141585392055
AKAP12	SMAD7	1	-0.00689633674610603
AKAP12	STC1	1	-0.0510001001810832
AKAP12	STX11	1	-0.0671067862520459
AKAP12	TAOK2	1	0.0211268685274188
AKAP12	TP53BP1	1	-0.0171514076626946
AKAP13	CAB39L	1	-0.0265143649215851
AKAP13	MFGE8	1	-0.0538911265688164
AKAP13	PPP1CB	1	-0.0008968331406305279
AKAP2	ANO1	1	-0.0377591527069907
AKAP2	ARHGDIA	1	-0.0277470031540468
AKAP2	C10orf54	1	-0.0629394608874385
AKAP2	CDC42BPG	1	-0.0565052466590106
AKAP2	CDH5	1	-0.0161043960823891
AKAP2	CLDN5	1	-0.0202369315814244
AKAP2	EFNB1	1	-0.0576014067358173
AKAP2	ERCC5	1	0.0022736306929430103
AKAP2	ESAM	1	-0.06829159465769301
AKAP2	ETS1	1	-0.0111842159778714
AKAP2	FAM83H	1	-0.0304157488465415
AKAP2	GNAZ	1	-0.0424737719968207
AKAP2	HIGD1B	1	-0.0104079935680946
AKAP2	ICAM2	1	-0.0234985503918551
AKAP2	INHBB	1	-0.0538579435966233
AKAP2	KANK3	1	-0.0345534734809064
AKAP2	MGLL	1	-0.0050236695601537
AKAP2	PKP1	1	-0.0582736541226151
AKAP2	PLCH2	1	-0.0120678159745554
AKAP2	RAPGEF5	1	-0.0227092653058392
AKAP2	SEMA3G	1	-0.0816238546494595
AKAP2	SERPINB5	1	-0.0025078458557065398
AKAP2	SHANK2	1	-0.0125085742766316
AKAP2	SHANK3	1	-0.0782054346342952
AKAP2	TCF15	1	-0.0513481805629519
AKAP2	TCF4	1	-0.0346130125571986
AKAP2	TP63	1	-0.00756557722004705
AKAP2	TSPAN18	1	-0.0110592492016932
AKAP6	ARHGEF9	1	-0.015633573468122
AKAP6	ASB2	1	-0.15235336635983598
AKAP6	CACNA1C	1	-0.00601745620836059
AKAP6	DGKG	1	-0.0367247832546444
AKAP6	ITIH3	1	-0.0686649988405958
AKAP6	MYOCD	1	-0.0176828652460377
AKAP6	NTF3	1	-0.15441110399091
AKAP6	PDZD4	1	-0.0282312885193162
AKAP6	RASL12	1	-0.0376190162360639
AKAP6	RBPMS2	1	-0.0204734230310208
AKAP6	SGCA	1	-0.0798905051358453
AKAP6	TPM2	1	-0.0364266256946596
AKAP8L	ATG4B	1	-0.00142890135019088
AKAP8L	BAZ2A	1	-0.0037116037465014
AKAP8L	CDKN1A	1	0.0066331542983885106
AKAP8L	MAPK8IP3	1	-0.000438544524772901
AKAP8L	MIDN	1	6.00887958036589e-05
AKAP8L	ODC1	1	0.0660214749788593
AKAP8L	PPRC1	1	0.0156362840407775
AKAP8L	ZMYM3	1	-0.08565857769846
AKAP8L	ZNF224	1	-0.0539591397991077
AKAP9	KLHDC2	1	-0.0298964093802448
AKAP9	TTC8	1	-0.0608985805214355
AKT1	GLUL	1	-0.0716222521156426
AKT1	KLC2	1	-0.0369219547958518
AKT1	PYGM	1	-0.0727329164164614
AKT1	SNX14	1	0.00845954500548351
AKT1	STON1	1	-0.007131283955757409
AKT3	LRRC8A	1	-0.0516455707191208
AKT3	PHLDA2	1	-0.000694900047015664
AL807752.1	CCDC85B	1	-0.0192110664722716
ALAD	AMOT	1	-0.009343763579850891
ALAS1	MYH14	1	-0.00720751436418035
ALAS1	RARG	1	-0.0309515231589092
ALAS2	PPBP	1	-0.0512027605265456
ALB	AMBP	1	-0.0524174546752159
ALB	APOA2	1	-0.0902309195710122
ALB	APOC3	1	-0.0412046417846004
ALB	FGA	1	-0.0029185613407913
ALB	FGB	1	-0.00642839099240435
ALCAM	C9orf152	1	-0.0410985529249653
ALCAM	EFCAB4A	1	-0.0227669683583178
ALCAM	FAM110A	1	-0.0493950709034024
ALCAM	IQGAP2	1	-0.0585137764383864
ALCAM	RBM47	1	-0.000804394894379015
ALCAM	SHROOM3	1	-0.040464127509319
ALCAM	SLC26A3	1	-0.00863445134209462
ALCAM	SLC38A1	1	-0.0150787192814555
ALCAM	SPINT1	1	-0.0140659107585055
ALCAM	ST14	1	-0.058118582674580005
ALCAM	TBC1D8	1	-0.0252998006433668
ALDH16A1	ANKRD29	1	-0.0193640286667308
ALDH16A1	CELF1	1	0.00034711379872172404
ALDH16A1	PAN3	1	-0.0162409264025422
ALDH1A1	FXYD1	1	-0.00695735197462709
ALDH1A1	PAQR4	1	0.0222718375008953
ALDH1A1	SPARCL1	1	0.0281370111134679
ALDH1A2	COL12A1	1	0.000300998446258461
ALDH1A2	HYAL2	1	-0.0138160169021978
ALDH1A3	KCTD14	1	-0.0217558580731776
ALDH1A3	KRT80	1	-0.0764967722598124
ALDH1A3	LMNA	1	-0.106304807293496
ALDH1A3	LOXL4	1	-0.143718834716069
ALDH1A3	PLXNB2	1	-0.0195416665180093
ALDH1A3	S100A6	1	-0.021698958344985
ALDH1A3	VGLL1	1	-0.0332194637250797
ALDH1A3	WDR34	1	-0.0274582768581815
ALDH1L1	BZRAP1	1	-0.00318001988551255
ALDH1L1	CIDEA	1	-0.011847378059206999
ALDH1L1	FAM47E-STBD1	1	-0.0027403984769645
ALDH1L1	FAM89A	1	-0.0222135470458107
ALDH1L1	GLYCTK	1	-0.0269588603970385
ALDH1L1	GPX3	1	-0.0008424626904418
ALDH1L1	GYG2	1	-0.0157429445392823
ALDH1L1	HADH	1	-0.118155206418173
ALDH1L1	LDHD	1	-0.132440812742381
ALDH1L1	LGALS12	1	-0.0232554298927419
ALDH1L1	MAOA	1	-0.0469513636795656
ALDH1L1	PC	1	-0.0680622946557306
ALDH1L1	PCK1	1	-0.0312478841106016
ALDH1L1	PDE3B	1	-0.0140318690671
ALDH1L1	PFKFB1	1	-0.0734675127532414
ALDH1L1	PLA2G16	1	-0.0831240379105513
ALDH1L1	PYGL	1	-0.0510006622820902
ALDH1L1	RBP4	1	-0.0220884196723858
ALDH1L1	SLC7A10	1	-0.0329167608285421
ALDH1L1	TST	1	-0.0757428367190482
ALDH1L2	ATF5	1	-0.00724665072357111
ALDH1L2	CALU	1	-0.0673103868239003
ALDH1L2	CHCHD10	1	-0.009458728029959241
ALDH1L2	EPHA2	1	0.00647575784230235
ALDH1L2	EPS8	1	-0.0416001973067565
ALDH1L2	FAM166B	1	-0.0322489151438269
ALDH1L2	FAM198A	1	-0.040895489092673994
ALDH1L2	FKBP10	1	-0.0273044317473048
ALDH1L2	GARS	1	-0.0190402628684359
ALDH1L2	LAMB1	1	-0.0268789530767196
ALDH1L2	NKD2	1	-0.084378600914004
ALDH1L2	NRARP	1	0.0035120411053001
ALDH1L2	ORMDL3	1	0.0192887144352787
ALDH1L2	P4HA2	1	-0.0353246505521777
ALDH1L2	PCOLCE	1	-0.0384674035674673
ALDH1L2	PHPT1	1	-0.0554915548172899
ALDH1L2	PTPRG	1	-0.11978322690972801
ALDH1L2	PYCR1	1	-0.009474673766135791
ALDH1L2	RELB	1	0.0157113599213187
ALDH1L2	TENC1	1	-0.00585945356139062
ALDH1L2	THAP7	1	0.00799396882345531
ALDH1L2	UBXN1	1	0.0192294551399307
ALDH1L2	ZBTB16	1	-0.0826813566628155
ALDH1L2	ZEB1	1	-0.0558795280842979
ALDH2	ATP9A	1	-0.0193228667723486
ALDH2	C12orf39	1	-0.00625719916896291
ALDH2	C7orf41	1	-0.0057934773716887605
ALDH2	CALB2	1	-0.00310935919210805
ALDH2	CDKN2B	1	-0.121907337498115
ALDH2	CFD	1	-0.0780026000264582
ALDH2	CIDEA	1	-0.00825437910010212
ALDH2	GLYAT	1	-0.0398375871224243
ALDH2	GYG2	1	-0.0223501763890765
ALDH2	HRASLS5	1	-0.0006784286370364429
ALDH2	NAT8L	1	-0.263288682208705
ALDH2	PALM	1	-0.0408130071381556
ALDH2	PLA2G16	1	-0.11552403012284501
ALDH2	TM7SF2	1	-0.0570746916621288
ALDH2	TUSC5	1	-0.0232544780102654
ALDH2	VEGFB	1	-0.0608124065109886
ALDH4A1	BAG3	1	-0.0473582499578426
ALDH4A1	BMP2	1	-0.0341251042017925
ALDH4A1	CCDC107	1	-0.0593051142815045
ALDH4A1	CCND1	1	-0.0241183976511799
ALDH4A1	CDKN1C	1	-0.0320066878059665
ALDH4A1	CSRNP1	1	-0.00969448070212505
ALDH4A1	CTD-2210P24.4	1	-0.0222872220531431
ALDH4A1	CTIF	1	-0.0109953581225295
ALDH4A1	CYP4B1	1	-0.0570407329473715
ALDH4A1	DMD	1	-0.10875660482302801
ALDH4A1	DPT	1	-0.0101502361179995
ALDH4A1	EYA2	1	-0.0251663889159652
ALDH4A1	FAAH	1	-0.128481777220535
ALDH4A1	GLYAT	1	-0.0331057935217169
ALDH4A1	GPBAR1	1	-0.0624488129542306
ALDH4A1	GRB14	1	-0.0404109044885479
ALDH4A1	HRSP12	1	-0.0347448662652199
ALDH4A1	HSPB7	1	-0.0619799854638587
ALDH4A1	HSPB8	1	-0.00862463456553368
ALDH4A1	KCNB1	1	-0.0423379350208881
ALDH4A1	MAN1A1	1	-0.00505350123877522
ALDH4A1	MBNL2	1	-0.0584544203642041
ALDH4A1	OXA1L	1	0.00702469346043235
ALDH4A1	PDE8B	1	-0.0168722538600597
ALDH4A1	PISD	1	-0.0534401445681789
ALDH4A1	PPP1R14A	1	-0.0920623011147223
ALDH4A1	PQLC1	1	-0.0182867454015286
ALDH4A1	QARS	1	0.073813064571846
ALDH4A1	RGS11	1	-0.0576833660793981
ALDH4A1	RRAS	1	-0.0679617477044488
ALDH4A1	SLC25A25	1	-0.0274032104757907
ALDH4A1	SLC7A4	1	-0.061327636746372004
ALDH4A1	SNCG	1	-0.0800941894634539
ALDH4A1	TIMP3	1	-0.0281126212709125
ALDH4A1	TIPARP	1	-0.00421462824088863
ALDH4A1	TMEM139	1	-0.0631615357853128
ALDOA	G6PD	1	-0.0470054740751455
ALDOA	GYS1	1	-0.0239840366617537
ALDOA	MDH2	1	-0.0126513383461314
ALDOA	NOP2	1	0.09086169555644098
ALDOA	UQCRC1	1	-0.0119404125574081
ALG3	ANAPC7	1	-0.00738185875773605
ALG3	ATP5G1	1	-0.0201068108885304
ALG3	CAD	1	-0.0454692411345427
ALG3	GPATCH4	1	-0.0876843015849498
ALG3	HSPB11	1	0.0147613985603851
ALG3	IARS	1	-0.022070460186207997
ALG3	LRRC42	1	0.0197567834154913
ALG3	PPIL1	1	-0.0168842440805425
ALG3	RRP9	1	-0.0636507247684279
ALG3	VARS	1	-0.0211300005433763
ALG6	C1orf159	1	-0.030089408280777
ALG6	CCDC130	1	-0.00274533536490431
ALG6	CUL9	1	-0.0598499356216807
ALG6	GAK	1	-0.00505162661323742
ALG6	MTF2	1	-0.00980744503933019
ALG6	PHF11	1	-0.0325431602970422
ALG6	TRMT13	1	-0.00718632953940584
ALG6	VPS36	1	-0.0040723091748145
ALG6	ZRANB2	1	-0.00767413425576024
ALKBH6	NFIX	1	0.00594282909638243
ALKBH6	PPOX	1	-0.000256996796811935
ALKBH7	DPM3	1	-0.0453334076864788
ALKBH7	ECI1	1	-0.0346536387101224
ALKBH7	SF3B5	1	-0.0218358983206696
ALKBH7	TMED5	1	-0.0332838524719352
ALOX15B	CD53	1	-0.0033081387922476698
ALOX15B	CUX2	1	-0.141392590603977
ALOX15B	GNMT	1	-0.0231094262722781
ALOX15B	IQGAP2	1	-0.0310879068198592
ALOX15B	KLK3	1	-0.0750409089309309
ALOX15B	LCP1	1	-0.0413169351888225
ALOX15B	PAPSS2	1	-0.0580423314163764
ALOX15B	PIP	1	-0.0282724457324879
ALOX15B	SPINK8	1	-0.0348978097599527
ALOX15B	STXBP2	1	-0.0099153463345055
ALOX15B	TRIM36	1	-0.121193868434755
ALOX15B	ZNF689	1	-0.0209018815571714
ALOX5	TBXAS1	1	-0.029032883379968996
ALOX5	WAS	1	-0.0328967740493295
ALOX5AP	ARHGAP9	1	-0.0452848483116085
ALOX5AP	C1QB	1	-0.0487294212370542
ALOX5AP	C1QC	1	-0.0254548210832414
ALOX5AP	C1orf162	1	-0.0463228869573692
ALOX5AP	C3AR1	1	-0.0520747263301276
ALOX5AP	CD163	1	-0.0613289716845382
ALOX5AP	CD53	1	-0.0301847390255594
ALOX5AP	CYBB	1	-0.0036505558675154703
ALOX5AP	EVI2A	1	-0.0139232102420153
ALOX5AP	FAM26F	1	-0.0268676378714916
ALOX5AP	GNA15	1	-0.0285293102286402
ALOX5AP	HCLS1	1	-0.0235247625908486
[truncated: 42,548 more rows]

## Sheet: Esophagus − Mucosa
Name1	Name2	Edge type	Edge weight
A2M	C1S	1	-0.0515463050905829
A2M	IGFBP4	1	-0.0750222782424456
A2M	IL1R1	1	-0.0038333593186871203
A2M	NNMT	1	-0.0376586520487251
A2M	TMEM176A	1	-0.0454613217979065
A2M	TMEM176B	1	-0.0792586007644438
AAAS	ARHGEF25	1	-0.0247531989259622
AAAS	CACNA1H	1	-0.000383183267846365
AAAS	CSRP1	1	-0.0471989135332309
AAAS	GABBR1	1	-0.0718970953488569
AAAS	GDI1	1	-0.0601369108009061
AAAS	ILK	1	-0.0624902447041788
AAAS	MYH11	1	-0.0240593595256437
AAAS	PARVA	1	-0.0185338577782043
AAAS	PLA2G6	1	-0.00932813806087451
AAAS	POGZ	1	-0.0307637793356858
AAAS	RRAS	1	-0.0312577704788108
AAAS	TMEM35	1	-0.0057627675201277
AAAS	TMEM8B	1	-0.0294555349549879
AAAS	TPM2	1	-0.0117463975508805
AAAS	TRAF1	1	-0.0120265496129853
AAK1	GNAI3	1	0.00845760206048183
AARS	DDIT3	1	-0.0387248827653635
AARS	EPRS	1	-0.0105596754278292
AARS	GARS	1	-0.0227005493637604
AARS	HERPUD1	1	-0.0346119568189363
AARS	IARS	1	-0.208364453836132
AARS	LONP1	1	-0.0355109152787397
AARS	MAP3K11	1	0.0423200347092575
AARS	MARS	1	-0.241495315809223
AARS	NARS	1	-0.154761157003925
AARS	PXK	1	-0.0357638087893169
AARS	PYCR1	1	-0.10041655845998701
AARS	PYCR2	1	-0.024210026175223
AARS	RHBDD1	1	-0.0725564374767003
AARS	RNF187	1	-0.0018232134927047801
AARS	SARS	1	-0.24753522525189198
AARS	SETD5	1	-0.0122789914109121
AARS	TUBE1	1	-0.100468160699127
AARS	WDR25	1	-0.00397440109239495
AARS	YARS	1	-0.233730570182914
AARS	ZSWIM4	1	0.0129501831777884
AATK	B4GALNT1	1	-0.0402033480802028
AATK	COL9A3	1	-0.0240037663586203
AATK	GFRA3	1	-0.0861528673222475
AATK	L1CAM	1	-0.0682029503002569
AATK	MPZ	1	-0.0737609469028622
AATK	PLP1	1	-0.0804211514699212
AATK	SOX10	1	-0.0252117648482374
ABAT	CDR2L	1	-0.0610074868893083
ABAT	HN1	1	-0.011796215167533998
ABAT	MAP4K2	1	-0.0195746159835376
ABCA12	ALOX12B	1	-0.0700371714186823
ABCA12	ARHGEF37	1	-0.0282900880603719
ABCA12	CLCN3	1	-0.0463394042402307
ABCA12	DLX5	1	-0.0297828193306027
ABCA12	ECI2	1	0.0258800413453595
ABCA12	INPP1	1	0.06464354389152299
ABCA12	KRTDAP	1	-0.0142086096117236
ABCA12	MYO5A	1	-0.0221668490931037
ABCA12	PTN	1	0.00432547544815386
ABCA12	WFDC5	1	-0.0158478917634243
ABCA2	GLS2	1	-0.04756254957422099
ABCA2	IGF1	1	0.0296812148118784
ABCA2	KCTD17	1	-0.00283446980334098
ABCA5	RCC1	1	0.0123674928516333
ABCA5	SMARCC2	1	0.0548931030382039
ABCA6	ABCA8	1	-0.203707702473257
ABCA6	ADAMTS5	1	-0.150353720075581
ABCA6	C10orf10	1	-0.0891197526423153
ABCA6	CALHM2	1	-0.0134440934576288
ABCA6	CBLB	1	-0.0455860223625825
ABCA6	CHST7	1	-0.0640732892039043
ABCA6	FAM65C	1	-0.0147728101651854
ABCA6	HSD17B11	1	-0.0676861836931852
ABCA6	ISLR	1	-0.00791766618957448
ABCA6	LAMA2	1	-0.0896680599882691
ABCA6	LARP6	1	-0.00730711155788983
ABCA6	OMD	1	-0.007007909978041529
ABCA6	PDK4	1	-0.0928220627652565
ABCA6	PID1	1	-0.13450304798383
ABCA6	PLSCR4	1	-0.0062611860081301
ABCA6	RAI2	1	-0.0671237095063374
ABCA6	SLC43A1	1	-0.0376838400105978
ABCA6	SNED1	1	-0.0488603605991144
ABCA6	TENC1	1	-0.0343719644970739
ABCA6	TSPAN18	1	0.0070514155367221
ABCA6	YPEL4	1	-0.11829822655310901
ABCA7	ADCK5	1	-0.0164959120153278
ABCA7	BICD2	1	-0.0172539159854107
ABCA8	CHRD	1	-0.03806116890055
ABCA8	CYBRD1	1	-0.0009735379974158961
ABCA8	FGF10	1	-0.0818260991669568
ABCA8	GRK5	1	-0.0280629598506642
ABCA8	ISLR	1	-0.0277082008466605
ABCA8	LARP6	1	-0.0186927843342377
ABCA8	PAMR1	1	-0.019534081206253003
ABCA8	PID1	1	-0.0379008888667959
ABCA8	SCARA5	1	-0.0132300435364089
ABCA8	SNED1	1	-0.0162063422079295
ABCB1	EMCN	1	-0.00279273355777817
ABCB1	KDR	1	-0.0221047550090238
ABCB6	ABCC1	1	-0.0810805390652092
ABCB6	ACAP3	1	-0.0363399241473849
ABCB6	ADH7	1	-0.0413924541500158
ABCB6	ALDH3A1	1	-0.0728920332318109
ABCB6	CBR1	1	-0.0840274921341164
ABCB6	CBX2	1	-0.0247263258904638
ABCB6	EPHX1	1	-4.4750407318380105e-05
ABCB6	G6PD	1	-0.09180611460030699
ABCB6	SRXN1	1	-0.0630903989621405
ABCB6	WASF1	1	-0.04642638897195699
ABCC1	ALDH3A1	1	-0.0356817491819245
ABCC1	CBR1	1	-0.0723332711475749
ABCC1	CPNE2	1	0.043640287169793
ABCC1	FOXN1	1	-0.0692950353706515
ABCC1	G6PD	1	-0.0679795478719562
ABCC1	GCLC	1	-0.00205005543359569
ABCC1	NCDN	1	-0.0974114300083922
ABCC1	SMO	1	-0.0315706490334824
ABCC1	SRXN1	1	-0.0106709137970065
ABCC3	IL1R2	1	-0.0474591545387291
ABCC5	CBR1	1	-0.014598106117876002
ABCC5	GCLC	1	-0.0918757856834473
ABCC5	IP6K2	1	-0.00298417312391003
ABCC5	LRIF1	1	0.0234728499762399
ABCD4	MAK16	1	0.0967432026391845
ABCG4	RGS20	1	-0.021106528120026002
ABCG4	TMEM86A	1	-0.0287007341102887
ABHD12	FNDC4	1	-0.0104906441497129
ABHD12	MMEL1	1	-0.0335810903579944
ABHD17C	ADAM9	1	-0.00906121418274273
ABHD17C	ALDH1A3	1	-0.12407256125186199
ABHD17C	ATP13A3	1	-0.0198780185244863
ABHD17C	BAZ2A	1	0.0318718411509903
ABHD17C	CDC42EP5	1	-0.0115137755820418
ABHD17C	CRYM	1	-0.0161281152413469
ABHD17C	DSG1	1	0.00403748111926133
ABHD17C	EGLN3	1	-0.0199218222577977
ABHD17C	ERI1	1	-0.0321766039326364
ABHD17C	GALNT1	1	-0.0710767018442285
ABHD17C	KIFC2	1	0.009806749661617221
ABHD17C	MCU	1	-0.0144192814553018
ABHD17C	RBM47	1	-0.0785974059141656
ABHD17C	STK39	1	-0.0205293896741349
ABHD17C	SYNGAP1	1	0.0055100585149881
ABHD17C	TGFA	1	-0.00662463130060054
ABHD17C	TMPRSS2	1	-0.10311064808939802
ABHD17C	UBL3	1	-0.0909612883472279
ABHD3	CMC2	1	-0.013676661516546998
ABHD3	CNST	1	-0.0381899697834577
ABHD3	DTD1	1	0.007606724147221659
ABHD3	HECTD1	1	-0.0456277773732717
ABHD3	HMOX1	1	-0.00410474567193446
ABHD3	TLCD2	1	0.0391784417857655
ABHD3	WDR26	1	-0.00792122705276813
ABHD5	ABTB2	1	-0.0443954664821866
ABHD5	CABLES1	1	-0.00857813578638652
ABHD5	CNST	1	-0.14415479358662198
ABHD5	ESAM	1	-0.0887951464914293
ABHD5	EZR	1	0.0318818128000053
ABHD5	HECTD1	1	-0.0286132461517846
ABHD5	MT1F	1	-0.0408289379153835
ABHD5	PFKFB2	1	-0.0118273815336679
ABHD5	PRSS8	1	-0.0668609810754431
ABHD5	QSOX1	1	-0.0379169183372497
ABHD5	SLCO4A1	1	-0.0295130230624111
ABHD5	SNX9	1	-0.109170059155561
ABHD5	TCP11L2	1	-0.0181437269210528
ABHD5	TGFB1	1	-0.0027301940337237
ABHD5	TNIP1	1	-0.0374212981241866
ABHD5	WASL	1	-0.00790656587406739
ABHD6	CDC42EP4	1	-0.0282951158289918
ABHD6	EPHB6	1	-0.00553792525201522
ABHD6	MFSD2A	1	-0.0278374302810961
ABHD6	RTKN2	1	0.0192240665295473
ABHD6	WNT4	1	-0.0366173456311121
ABHD8	BAD	1	-0.0820951131910996
ABHD8	UBTD1	1	-0.0658566247440127
ABHD8	ZNF358	1	-0.0369049500703298
ABHD8	ZNF444	1	-0.0005272958136410679
ABI3BP	CCDC80	1	-0.05233004806587099
ABI3BP	COL6A3	1	-0.00191227753095494
ABI3BP	CTSK	1	-0.031025561187918996
ABI3BP	DAB2	1	-0.0121647548696152
ABI3BP	FBN1	1	-0.11161909905538099
ABI3BP	LUM	1	-0.0357205785779683
ABI3BP	OGN	1	-0.0409172341710726
ABI3BP	PODN	1	-0.0391353977230443
ABI3BP	SFRP2	1	-0.0132287482526583
ABI3BP	SRPX	1	-0.0702898141719315
ABL1	AKAP12	1	-0.0213873424115025
ABL1	C1S	1	-0.00665324554919228
ABL1	CBLB	1	-0.0558866821039659
ABL1	EPAS1	1	-0.0169857586454773
ABL1	FOSL2	1	-0.0408383258383309
ABL1	GFPT2	1	-0.0257723630559475
ABL1	GPR133	1	-0.0266367002254089
ABL1	KLF9	1	-0.017369642754558996
ABL1	MAP7D1	1	0.00565459095752295
ABL1	NID1	1	-0.0565578224771759
ABL1	NNMT	1	-0.224493616645355
ABL1	PGF	1	-0.022071635918775
ABL1	PHC2	1	-0.0914559027835634
ABL1	SESN1	1	-0.0306464711959721
ABL1	SLC39A14	1	-0.0891368632702831
ABLIM1	HPGD	1	-0.000362759474925785
ABLIM1	PITPNM3	1	-0.0118861948734859
ABLIM2	CAPN5	1	-0.11061972301405801
ABLIM2	CELSR2	1	0.0181393930918129
ABLIM2	CIRBP	1	-0.009422560928059409
ABLIM2	DKK4	1	-0.012635937582222
ABLIM2	DOC2B	1	-0.0383075971816141
ABLIM2	IL4R	1	-0.00655027161560419
ABLIM2	LYN	1	-0.0137527790788549
ABLIM2	RAPGEF5	1	-0.00409833447072774
ABLIM2	RASAL1	1	-0.0324891486997838
ABLIM2	RPS6KA2	1	-0.0387123997046915
ABLIM2	SERPINB5	1	0.0319972443031094
ABLIM2	SH3TC1	1	-0.0621005927619198
ABLIM2	STK39	1	-0.0600812745537019
ABLIM2	TPK1	1	-0.00288703287513666
ABLIM2	VWA1	1	-0.0101859289242202
ABLIM2	ZFYVE28	1	-0.0304936745071818
ABLIM3	ATG9B	1	-0.0786887907934243
ABLIM3	CAMK2N1	1	-0.006592101195453779
ABLIM3	CNST	1	-0.0589796402182333
ABLIM3	DEAF1	1	-0.00565757994248216
ABLIM3	ESAM	1	-0.0368481187101917
ABLIM3	FAM214A	1	-0.012766807355778
ABLIM3	LPIN2	1	-0.0173099025047674
ABLIM3	RNASE7	1	-0.0136265283802065
ABLIM3	RUSC2	1	-0.00044704123618538605
ABLIM3	SNX9	1	-0.0302160493091454
ABRACL	DMTF1	1	0.00466485476871746
ABRACL	HSBP1L1	1	-0.0132709001455849
ABRACL	TMEM219	1	-0.0215166155136669
ABTB1	AIP	1	-0.044374632966008
ABTB1	CALCOCO1	1	-0.0866165055389795
ABTB1	CBX7	1	-0.0623964504125697
ABTB1	CRISP3	1	0.00439949018742264
ABTB1	CTSF	1	-0.10465615766570699
ABTB1	FUZ	1	-0.115670783176334
ABTB1	HSD17B11	1	-0.0770135225908002
ABTB1	IRS2	1	-0.0447384728737422
ABTB1	SLC43A1	1	-0.0281456816649245
ABTB1	YPEL4	1	-0.0438855184594054
ABTB2	ADCY9	1	-0.018079714763671
ABTB2	ALPK3	1	-0.0513553896325441
ABTB2	ATP6V1C2	1	-0.0200740040734494
ABTB2	B4GALT1	1	-0.0279224577610417
ABTB2	BCAR3	1	-0.0121527660481335
ABTB2	CABLES1	1	-0.0821033129778785
ABTB2	CAMK2N1	1	-0.0430889162155676
ABTB2	CNST	1	-0.0241825791817102
ABTB2	DUSP4	1	-0.0345622530767449
ABTB2	ESAM	1	-0.047178147635033
ABTB2	FAM214A	1	-0.0564655705419871
ABTB2	FBXO34	1	-0.0270458604224368
ABTB2	LNX1	1	-0.0575007618464403
ABTB2	MPP7	1	0.0297716367779637
ABTB2	MYZAP	1	-0.0134959686240782
ABTB2	OSBPL3	1	-0.0176341276420369
ABTB2	PELI1	1	-0.0117447296279999
ABTB2	PLEKHF1	1	-0.0433475216873401
ABTB2	PRSS8	1	-0.0757506406994541
ABTB2	PTK2B	1	-0.024849117943606003
ABTB2	PTPN3	1	-0.008477777191959579
ABTB2	RASAL2	1	-0.0279352900890166
ABTB2	RIN3	1	-0.070062909346843
ABTB2	RNASE7	1	-0.141965778825098
ABTB2	RND3	1	-0.0303186655913095
ABTB2	SECISBP2L	1	-0.0680646570016834
ABTB2	SNX9	1	-0.126795792286644
ABTB2	SPIRE1	1	-0.0773204297997414
ABTB2	SPSB3	1	-0.0137162659241341
ABTB2	TCP11L2	1	-0.0212710526038473
ABTB2	TEAD1	1	-0.00558836225958254
ABTB2	TGFB1	1	-0.0111059673709621
ABTB2	TNIP1	1	-0.0877391445822468
ABTB2	TP53BP2	1	-0.0498814800852684
ABTB2	TPD52	1	0.00508988171699379
ABTB2	VSIG2	1	-0.0037976204852103205
ABTB2	WASL	1	-0.0249767167181041
AC006116.20	KRT1	1	-0.0103779033960195
AC006116.20	SIGIRR	1	0.00518067541627801
AC012313.1	CEBPA	1	-0.12557735019177602
AC012313.1	KLF16	1	-0.00027878482354076804
AC012313.1	PHLDA2	1	-0.0749008032586965
AC012313.1	TMEM160	1	-0.0550546328931942
ACAD11	BTAF1	1	-0.0279822540851169
ACADM	ALDH1L1	1	-0.0179773172448186
ACADM	CWH43	1	0.05262657371697901
ACADM	DHRS9	1	-0.0808057388515248
ACADM	DSP	1	0.0206320431557303
ACADM	FAM214A	1	-0.0126956856970627
ACADM	FCHO2	1	-0.0019307538074998898
ACADM	LNX1	1	-0.0678571719598815
ACADM	NDFIP2	1	-0.00463859688958024
ACADM	PLS1	1	-0.0591791353458406
ACADM	PLSCR1	1	-0.0038676073343548102
ACADM	PORCN	1	-0.00185855311880762
ACADM	PSCA	1	-0.0138236172291575
ACADM	SH2D1B	1	-0.0476117159598016
ACADM	SRPX2	1	-0.171017051144984
ACADM	TAX1BP1	1	-0.0520419222457285
ACADM	TJP3	1	-0.00335805163152421
ACADM	TMCO4	1	-0.0862220538992333
ACADM	TMPRSS2	1	-0.0155823298525267
ACADM	TSPAN6	1	-0.0466777755319264
ACADM	UPRT	1	-0.0446411671162052
ACADM	ZSWIM4	1	-0.0519874948282564
ACADVL	ALDH1L2	1	0.00593405576460398
ACADVL	CAT	1	-0.00245376811715342
ACADVL	HMGCS2	1	-0.114254492902363
ACADVL	PTOV1	1	-0.0589253639069783
ACADVL	SLC3A2	1	0.0249910145446811
ACADVL	TOMM5	1	-0.0138387161388007
ACADVL	ZSWIM8	1	-0.0129493367910271
ACAP1	ARHGAP9	1	-0.0890490688987719
ACAP1	CARD11	1	-0.0411122227152287
ACAP1	CD48	1	-0.0413507250186234
ACAP1	CD52	1	-0.00934469677575416
ACAP1	DOCK2	1	-0.000316325049485533
ACAP1	MYO1G	1	-0.0552211907574385
ACAP1	PTPRCAP	1	-0.004579942285101671
ACAP1	RASAL3	1	-0.0917280760649781
ACAP1	RLTPR	1	-0.14467528364813
ACAP1	TBC1D10C	1	-0.16314890460901002
ACAP1	TMC8	1	-0.0810190543762585
ACAP1	TRAF3IP3	1	-0.0412117915705308
ACAP1	ZAP70	1	-0.10449301959862299
ACAP3	ADAM33	1	-0.0320195620632485
ACAP3	CDC42BPG	1	-0.15229408961169
ACAP3	CENPT	1	-0.0132477572609792
ACAP3	CEP170B	1	-0.009842140397142759
ACAP3	CLCN7	1	-0.0825802244353971
ACAP3	CLUH	1	-0.026277328769057997
ACAP3	CXXC1	1	-0.0841554421701338
ACAP3	DDX39A	1	-0.00319287405932958
ACAP3	DMPK	1	-0.0285566550777127
ACAP3	EIF4EBP3	1	0.072329451687177
ACAP3	EME2	1	-0.0736548192569252
ACAP3	ENTHD2	1	-0.0353354078854247
ACAP3	FAM73B	1	-0.00567527401540344
ACAP3	HDAC6	1	-0.0148833708455503
ACAP3	HR	1	-0.0124527505122414
ACAP3	KIFC2	1	-0.0985730388122665
ACAP3	KLHL17	1	-0.11679160056292999
ACAP3	LRRC45	1	-0.0410089209862418
ACAP3	MAPK8IP3	1	-0.0528303496136372
ACAP3	MAPKBP1	1	-0.000107121991126891
ACAP3	NFASC	1	-0.00433239049281695
ACAP3	PATZ1	1	0.0400461954566114
ACAP3	PKP3	1	-0.04658561173904
ACAP3	PLXNB1	1	-0.0927785628627788
ACAP3	PNKP	1	-0.00474059823849829
ACAP3	SIRT7	1	-0.0432176773490619
ACAP3	SRRT	1	-0.0179162331300761
ACAP3	TMEM219	1	0.0335367507171506
ACAP3	TRMU	1	-0.0147007403413384
ACAP3	UCN2	1	-0.0102487984755918
ACAP3	USP35	1	-0.0034975762599126197
ACD	TARBP1	1	0.0105239435556108
ACE2	SAMD9	1	-0.0143506450675469
ACHE	EEF1A2	1	-0.0371836832932573
ACKR3	PTPRC	1	0.0053684204889672
ACLY	ACSL1	1	-0.0626876535505162
ACLY	ACSS2	1	-0.145197264099492
ACLY	C14orf1	1	-0.134438010119117
ACLY	CYB5B	1	-0.0541295381577539
ACLY	DHCR24	1	-0.0175233003716518
ACLY	DHCR7	1	-0.18765791273387197
ACLY	EBP	1	-0.0598969652458363
ACLY	FADS2	1	-0.034995466023246005
ACLY	HMGCR	1	-0.0488698526480748
ACLY	INSIG1	1	-0.0115850067036281
ACLY	MVD	1	-0.0730201102887269
ACLY	MVK	1	-0.032672724552336004
ACLY	NSDHL	1	-0.007390269452161121
ACLY	PCSK9	1	-0.227149794127615
ACLY	PLA2G3	1	-0.0339909278257414
ACLY	RDH11	1	-0.0645622143104207
ACLY	SC5D	1	-0.0317352867549012
ACLY	SLC16A13	1	-0.0407820552010584
ACLY	STARD4	1	-0.0619201772050485
ACOT7	SEC31B	1	-0.000540330386493858
ACP5	B3GNT4	1	-0.0165507969968373
ACP5	CDK19	1	-0.0239898208701859
ACP5	GALK1	1	-0.0801121661167155
ACP5	GBE1	1	-0.0281572615010088
ACP5	NDRG1	1	-0.10067458320199901
ACP5	NDUFA4L2	1	-0.046186406159117996
ACP5	NLRX1	1	-0.0626216559957486
ACP5	PDK3	1	-0.13550988429264502
ACP5	PFKFB4	1	-0.134533182614905
ACP5	PLOD1	1	-0.00790696268758494
ACP5	PPFIA4	1	-0.0169360167092679
ACP5	VEGFB	1	-0.0296985747910199
ACP5	ZNF395	1	-0.08028235984061
ACSF2	CDIP1	1	-0.0425162079770743
ACSF2	CELSR2	1	-0.00350677443402665
ACSF2	CLIP2	1	-0.0498304673818412
ACSF2	COL7A1	1	-0.00802097682713967
ACSF2	DOC2A	1	-0.0583180339832592
ACSF2	DST	1	-0.0502438912787434
ACSF2	EPHB6	1	-0.0020158980722910697
ACSF2	LAMB2	1	-0.0598917696713404
ACSF2	MAP4K2	1	-0.0340075413805866
ACSF2	MEN1	1	-0.00653340754351507
ACSF2	NISCH	1	-0.011109893561555001
ACSF2	PDIA5	1	0.0171433558622936
ACSF2	PLEKHN1	1	0.0731699759153237
ACSF2	PNKD	1	-0.00933794803478651
ACSF2	SOX12	1	-0.0503475237046967
ACSF2	THSD4	1	-0.0308067093388519
ACSF2	TMEM184B	1	-0.0668275098902544
ACSF2	UBALD1	1	-0.0168425689910432
ACSF2	ZNF839	1	0.0420415500070801
ACSL1	ACSS2	1	-0.0700887885854533
ACSL1	C14orf1	1	-0.0437830125821374
ACSL1	DHCR7	1	-0.0755146736062198
ACSL1	DMKN	1	-0.010680250608280002
ACSL1	FGFBP1	1	-0.00305145212433
ACSL1	INSIG1	1	-0.108388541714893
ACSL1	MVD	1	-0.0616803267502288
ACSL1	SQLE	1	-0.0143254838995081
ACSL5	B2M	1	-0.00327127044070163
ACSL5	ETV7	1	-0.11986552930979302
ACSL5	HERC6	1	-0.00536040664097233
ACSL5	PSMB10	1	-0.11495664485497098
ACSL5	PSMB8	1	-0.0685172310384783
ACSL5	RTP4	1	-0.0582631229358871
ACSS1	LFNG	1	-0.0372085572211013
ACSS1	MOB3C	1	-0.0385517295314809
ACSS1	TMEM63C	1	-0.0414572877827094
ACSS2	C14orf1	1	-0.0240603077708478
ACSS2	CYB5B	1	-0.0724936911896238
ACSS2	DHCR24	1	-0.0382871780428781
ACSS2	DHCR7	1	-0.185233572230469
ACSS2	EBP	1	-0.161944853520064
ACSS2	INSIG1	1	-0.135357308732477
ACSS2	MVK	1	-0.0560478533003274
ACSS2	NSDHL	1	-0.0222508473214479
ACSS2	PCSK9	1	-0.134465646187116
ACSS2	PLA2G3	1	-0.0477499259895335
ACSS2	RDH11	1	-0.10139112744525099
ACSS2	SQLE	1	-0.0110669099194767
ACSS2	THEM6	1	-0.0816874662540157
ACSS2	TM7SF2	1	-0.0538217582431812
ACSS3	ADAMTS5	1	-0.018040933450103002
ACSS3	ASB2	1	0.0658506231187563
ACSS3	BICC1	1	-0.00674340311503253
ACSS3	FAM198B	1	-0.00551442636264943
ACSS3	GPC6	1	-0.0182866533973364
ACSS3	IQCJ-SCHIP1	1	0.0862882882348602
ACSS3	KLHL13	1	0.007262924286805241
ACSS3	PDGFRA	1	-0.014975513404481002
ACSS3	PDLIM3	1	0.0159098523372868
ACSS3	TSPAN18	1	0.108549632022717
ACTA1	ACTN2	1	-0.11886220079543801
ACTA1	CKM	1	-0.229095256031482
ACTA1	MB	1	-0.0646991530005601
ACTA1	MYBPC1	1	-0.125695639074496
ACTA1	MYL1	1	-0.203547315625659
ACTA1	MYL2	1	-0.250435924893127
ACTA1	MYL3	1	-0.0293677794001682
ACTA1	MYLPF	1	-0.00908353286994186
ACTA1	TCAP	1	-0.0322511680444718
ACTA1	TNNC1	1	-0.18466266203395498
ACTA1	TNNC2	1	-0.0455745878124102
ACTC1	GNAZ	1	-0.00046098621868325
ACTC1	RAMP1	1	-0.033922140393525
ACTC1	TMEM35	1	-0.0359039991885973
ACTG2	CASQ2	1	-0.0427255265037149
ACTG2	CFL2	1	-0.0659340018481159
ACTG2	CNN1	1	-0.32374748268881604
ACTG2	COL4A2	1	-0.0374902152620219
ACTG2	CSRP1	1	-0.10698830872830699
ACTG2	DES	1	-0.0927574019934222
ACTG2	DNAJB5	1	-0.100017603982056
ACTG2	FLNA	1	-0.014880611724953998
ACTG2	HSPB6	1	-0.00603617660848914
ACTG2	IL17B	1	-0.0775184300284718
ACTG2	JPH2	1	-0.0331201802709036
ACTG2	MORN5	1	-0.0106247924400621
ACTG2	MYH11	1	-0.00243241553393425
ACTG2	MYL9	1	-0.0565546059645381
ACTG2	P2RX1	1	-0.0167472331696948
ACTG2	PCP4	1	-0.0903185050391453
ACTG2	PDLIM7	1	-0.0865916557105281
ACTG2	PLA2G5	1	-0.0617456694872981
ACTG2	PLEKHO1	1	-0.0327878603186752
ACTG2	RASL12	1	-0.0459975863192385
ACTG2	SDC3	1	-0.005942709847505679
ACTG2	SH3BGR	1	-0.0258102356229511
ACTG2	SMTN	1	-0.015235722720258001
ACTG2	SYNM	1	-0.12574831017632598
ACTG2	TAGLN	1	-0.228608813671969
ACTG2	TGFB1I1	1	-0.0463198777116269
ACTG2	TMEM158	1	-0.0923835609912078
ACTG2	TPM2	1	-0.13642332406688398
ACTG2	WFDC1	1	-0.03777046862767
ACTN2	CKM	1	-0.10098025583630803
ACTN2	MYL1	1	-0.0529568022195194
ACTN2	MYL2	1	-0.0851850406080977
ACTN2	MYL3	1	-0.00639077598823159
ACTN2	TCAP	1	-0.0560648357882289
ACTN2	TNNC1	1	-0.11131254172145401
ACVR1B	DDX56	1	0.0184721685073185
ACVR1B	IGFBP4	1	-0.007806497406385191
ACVR1B	KLHDC8B	1	-0.0056385213299199105
ACVR1B	NOP2	1	0.00407733204660354
ACVR1B	NXF1	1	0.00104649299590524
ACVR1B	PHF3	1	-0.0185200839181136
ACVR1B	PIK3IP1	1	-0.0715668071861835
ACVR1B	PPRC1	1	0.0458210683199388
ACVR1B	SFN	1	0.0178336130121138
ACVR1B	SLC20A1	1	0.0137796945855144
ACVR1B	TMEM173	1	-0.0325741199138501
ACVR1B	ZNF217	1	-0.0896568728137998
ACVR2A	ALDH4A1	1	0.024582064064740002
ACVR2A	FAM83G	1	0.0342829412257948
ACVR2A	KDM6B	1	0.0267513133272493
ACVR2A	MNT	1	0.000807341906430026
ACVR2A	NFIX	1	0.05533588955486401
ACVR2A	PLEC	1	0.0377981094474988
ACVR2A	SPATA2L	1	0.0617668997469882
ACY1	AP1G2	1	0.0199127758948372
ACY1	B4GALT7	1	-0.0522742739543915
ACY1	CIRBP	1	-0.00917099686629546
ACY1	PYCR2	1	-0.0257749815213609
ACY1	TMEM141	1	-0.0343117914632224
ACY3	AGR3	1	-0.0706332301512819
ACY3	ANO7	1	-0.0450043773702678
ACY3	C6orf58	1	-0.0425351523053677
ACY3	CAPN8	1	-0.0874556058411304
ACY3	CAPN9	1	-0.0165904525273332
ACY3	CHAD	1	-0.110994371111237
ACY3	CREB3L4	1	-0.0297922623947946
ACY3	EFCAB4B	1	-0.0442968247866471
ACY3	ENTPD8	1	-0.103985133682895
ACY3	KCTD14	1	-0.0452747638994117
ACY3	KIAA1324	1	-0.0838007557715068
ACY3	MUC16	1	-0.0522160778272266
ACY3	NKX3-1	1	-0.0890227059796189
ACY3	PLEKHB1	1	-0.0315676957308422
ACY3	PODXL2	1	-0.0130345919898798
ACY3	PTPRN2	1	-0.134853990444045
ACY3	SCGB2A1	1	-0.0708188749205098
ACY3	SLC12A2	1	-0.0282521874554634
ACY3	SLC39A8	1	-0.0136674560704801
ACY3	SPDEF	1	-0.0734923686638289
ACY3	TFF1	1	-0.0554338278840644
ACY3	TFF2	1	-0.00640634528927545
ACY3	TSPAN1	1	-0.0045881431095190104
ACY3	TSPAN8	1	-0.0438187815438232
ACY3	VSTM2L	1	-0.033768638897568995
ACYP1	BCL6	1	-0.00457719919573668
ADA	CDIP1	1	-0.106421288883254
ADAM23	BRINP1	1	-0.0787258661071162
ADAM23	CA2	1	-0.00189062193489731
ADAM23	ME1	1	-0.0127792390668168
ADAM23	RNF217	1	-0.0124982177678511
ADAM28	COL9A2	1	-0.0364541083892085
ADAM28	MS4A1	1	-0.0330734418998621
ADAM33	ARHGEF25	1	-0.0440361464010555
ADAM33	CACNA1H	1	-0.0856299014951616
ADAM33	CENPT	1	-0.0176000627826144
ADAM33	COL16A1	1	-0.0998073895142394
ADAM33	COL6A1	1	-0.240449815908053
ADAM33	COL6A2	1	-0.0744550072366354
ADAM33	CORO6	1	-0.0579214311517136
ADAM33	DDX39A	1	-0.0187408349877841
ADAM33	DTX3	1	-0.0959416979933397
ADAM33	GABBR1	1	-0.0243243814602049
ADAM33	GPR124	1	-0.00565318222266644
ADAM33	HSF4	1	-0.00430233554804925
ADAM33	ITGA7	1	-0.0274172804767166
ADAM33	KIAA1755	1	-0.0777639618273706
ADAM33	LAMB2	1	-0.0176064717508604
ADAM33	LIMS2	1	-0.00202323945778921
ADAM33	MICAL1	1	-0.106842525629435
ADAM33	MUSTN1	1	-0.0356456896394647
ADAM33	NISCH	1	-0.018080712053341
ADAM33	PRRT2	1	-0.11183594725598499
ADAM33	SRRM2	1	-0.00149568872388282
ADAM8	APOBR	1	-0.0250489780484119
ADAM8	ARHGAP9	1	-0.00405984640457763
ADAM9	AGFG1	1	-0.0201693880390254
ADAM9	ALDH1A3	1	-0.0971342369401159
ADAM9	ALPK3	1	-0.000272235445347213
ADAM9	CDC42EP5	1	-0.0253638661985552
ADAM9	CWH43	1	0.0123328501096918
ADAM9	CYP4F22	1	0.0355428101247786
ADAM9	DSC2	1	0.0005241396137063981
ADAM9	DSG1	1	0.0409576099485736
ADAM9	ENDOU	1	0.042507176178155
ADAM9	FAM107B	1	-0.0584955610982641
ADAM9	HDAC5	1	0.0169374860541159
ADAM9	KIFC3	1	-0.0170482410374334
ADAM9	LNX1	1	-0.10151094276435699
ADAM9	MCU	1	-0.15046935864227098
ADAM9	NCEH1	1	-0.0298976615577402
ADAM9	NEDD4L	1	-0.0128649605263779
ADAM9	PDP1	1	-0.0712829138591884
ADAM9	PLBD1	1	-0.0164382422225629
ADAM9	PLSCR1	1	-0.0476950350004514
ADAM9	RDH12	1	0.00350896675089072
ADAM9	SOS2	1	-0.00923025974049602
ADAM9	TEAD1	1	-0.041871166402098994
ADAM9	WASL	1	-0.137042381953021
ADAMDEC1	ADORA3	1	-0.0120143472536294
ADAMDEC1	GPR34	1	-0.0109001951054534
ADAMTS1	AKAP12	1	-0.0398041647807547
ADAMTS1	APOLD1	1	-0.25741719857452805
ADAMTS1	BTG2	1	-0.132514750284799
ADAMTS1	C11orf96	1	-0.0142385717539533
ADAMTS1	CYR61	1	-0.0558635282726027
ADAMTS1	FOSL2	1	-0.0343033373099263
ADAMTS1	GEM	1	-0.0676443655867506
ADAMTS1	GIMAP7	1	0.0303013153783892
ADAMTS1	GRASP	1	-0.12157139414711
ADAMTS1	IL6	1	-0.0138398995598058
ADAMTS1	NR4A2	1	-0.132380571061066
ADAMTS1	NR4A3	1	-0.00451488604457666
ADAMTS1	PER1	1	-0.00110197685847038
ADAMTS1	RNF122	1	-0.0694686099438013
ADAMTS1	SIK1	1	-1.4007358472567499e-05
ADAMTS10	ARAP3	1	-0.0373507015822293
ADAMTS10	CHRD	1	-0.11851170038819801
ADAMTS10	FOXS1	1	-0.00399235836388325
ADAMTS10	MUSTN1	1	-0.0162466824469167
ADAMTS10	NXPH3	1	-0.0089045856157436
ADAMTS10	PDGFRB	1	-0.0979418154675064
ADAMTS10	SNED1	1	-0.00225259152076262
ADAMTS10	TBX2	1	-0.008816164019051291
ADAMTS15	FAM198A	1	-0.054382364017378
ADAMTS15	FOXO1	1	-0.106785056072152
ADAMTS15	KLF9	1	-0.0012127424639373301
ADAMTS15	SH3PXD2B	1	-0.000143999629843544
ADAMTS15	ZNF853	1	0.0118111868799668
ADAMTS2	ADAMTS5	1	-0.0237565612132702
ADAMTS2	C3orf55	1	-0.0797166615723178
ADAMTS2	CD163	1	-0.0366539381333666
ADAMTS2	CD207	1	0.00401581884719748
ADAMTS2	CNR1	1	-0.0528120853240088
ADAMTS2	COL1A2	1	-0.0342870465678137
ADAMTS2	COL5A2	1	-0.048974117997444
ADAMTS2	CORO6	1	-0.00860002148884771
ADAMTS2	CRLF1	1	-0.0405873980835746
ADAMTS2	CTSK	1	-0.00148895561957715
ADAMTS2	LAMA2	1	-0.0325961853221393
ADAMTS2	LOXL3	1	-0.0600002790265699
ADAMTS2	MAP3K12	1	-0.022052899476665003
ADAMTS2	MFGE8	1	-0.0698621668982347
ADAMTS2	MMP2	1	-0.034705509891919
ADAMTS2	OLFML3	1	-0.0109207980924341
ADAMTS2	PDGFRB	1	-0.0298980939308725
ADAMTS2	PODN	1	-0.0761912162188995
ADAMTS2	RNF150	1	0.0583404044760719
ADAMTS2	SPON2	1	-0.0258165557263858
ADAMTS2	TCF21	1	-0.0276220272781314
ADAMTS2	TCN2	1	-0.00793632388460859
ADAMTS2	VSIG4	1	-0.0494119538799157
ADAMTS2	WISP2	1	-0.00337297984990088
ADAMTS2	XPNPEP2	1	-0.004000007965822229
ADAMTS5	AGTR1	1	-0.15400865887598497
ADAMTS5	AOX1	1	-0.0832684089320242
ADAMTS5	ASB2	1	0.00540177194757234
ADAMTS5	BCAT1	1	-0.071858412093138
ADAMTS5	CBLB	1	-0.119770601802985
ADAMTS5	CCL11	1	0.0472635685813001
ADAMTS5	CHST7	1	-0.0435081143860334
ADAMTS5	CNR1	1	-0.0337082349308749
ADAMTS5	EBF1	1	-0.0745768572054102
ADAMTS5	FBN1	1	-0.019671503389515
ADAMTS5	GAS1	1	-0.133041516923002
ADAMTS5	GPR133	1	-0.193106143998482
ADAMTS5	GPX3	1	-0.0212617327984716
ADAMTS5	HSD11B1	1	-0.0251886321160098
ADAMTS5	IGSF10	1	-0.0111137381318851
ADAMTS5	IRAK3	1	-0.00713243173040315
ADAMTS5	KLF15	1	-0.0398324793602115
ADAMTS5	LAMA2	1	-0.0640672419347725
ADAMTS5	MAN1A1	1	-0.0630215111813368
ADAMTS5	NID1	1	-0.00528289127406529
ADAMTS5	PID1	1	-0.118545296930778
ADAMTS5	PROCR	1	-0.0228206390093041
ADAMTS5	RAB8B	1	-0.000413148611819023
ADAMTS5	RYR2	1	0.0261734848196314
ADAMTS5	SCARA5	1	-0.0185072509429919
ADAMTS5	SESN1	1	-0.0346280255027559
ADAMTS5	SPOCK1	1	-0.0322024472427408
ADAMTS5	TLR4	1	-0.0655636339989362
ADAMTS5	VSIG4	1	-0.00328015160384154
ADAMTS8	BIN1	1	-0.0602548390310097
ADAMTS8	BRSK2	1	-0.0130407291726123
ADAMTS8	C1orf95	1	-0.0139220211966934
ADAMTS8	CHRDL2	1	-0.0392512919411977
ADAMTS8	DNAJB5	1	-0.0192805805539119
ADAMTS8	ITGA5	1	-0.0899981936227532
ADAMTS8	KLHL15	1	-0.03082502690528
ADAMTS8	LAMB1	1	-0.015391959845183
ADAMTS8	LMO3	1	0.00291972632807104
ADAMTS8	MRVI1	1	-0.0469115689048874
ADAMTS8	MYOCD	1	-0.00580186276751456
ADAMTS8	P2RX1	1	-0.0409830032107636
ADAMTS8	PDE1B	1	-0.05998476370341299
ADAMTS8	PRIMA1	1	-0.179173563519624
ADAMTS8	WBSCR17	1	-0.0461638743574649
ADAMTS9	CD93	1	-0.0141780877130365
ADAMTS9	COL4A1	1	-0.0156205730222042
ADAMTS9	CREM	1	-0.00975009143906917
ADAMTS9	IL6	1	-0.0130076234928638
ADAMTS9	INHBB	1	-0.0175814132734012
ADAMTS9	MEDAG	1	-0.0296490020752611
ADAMTS9	NNMT	1	-0.127029890872351
ADAMTS9	PHLDA2	1	0.00441918554246823
ADAMTS9	SLC39A14	1	-0.0646415722552316
ADAMTS9	SPRY1	1	-0.0325440426848411
ADAMTS9	STC1	1	-0.0562857768424467
ADAMTS9	TIMP1	1	-0.0240370828298342
ADAMTS9	TMEM2	1	-0.0755993663476579
ADAMTSL4	ECM1	1	-0.0106185804388851
ADAMTSL5	CELSR2	1	-0.0292341583358969
ADAMTSL5	EFHD2	1	-0.0260476235285258
ADAMTSL5	MAP7D1	1	-0.00989546454522583
ADAMTSL5	PJA1	1	-0.0422692839059247
ADAMTSL5	ST6GALNAC4	1	-0.0630064873408521
ADAMTSL5	WNT10A	1	-0.0607595203293411
ADAR	SAMD9L	1	-0.0133871376570038
ADAR	SMCR8	1	-0.006969100043630111
ADAR	STAT1	1	-0.0657297665101153
ADARB1	ADCY5	1	-0.0246861096326063
ADARB1	ARMC9	1	-0.0185172268297306
ADARB1	CAMK2G	1	-0.0017267969125875
ADARB1	DAAM2	1	-0.101821496038462
ADARB1	DMPK	1	-0.0139581229167736
ADARB1	EPM2A	1	-0.043638888951791
ADARB1	HSPB3	1	-0.00235150843660978
ADARB1	ITGA9	1	-0.0320723375478996
ADARB1	LIMS2	1	-0.0276443965515339
ADARB1	PDZD4	1	-0.0166773726973882
ADARB1	PPP1R12C	1	-0.10157279515421198
ADARB1	RGS9	1	-0.0191207987420873
ADARB1	RYR2	1	-0.0175532574049488
ADAT2	AIP	1	0.0245428171751061
ADAT2	TARBP1	1	-0.004996787787817001
ADCK5	PYCARD	1	-0.0196641428329902
ADCY3	PPL	1	-0.0162409276293033
ADCY3	STRN	1	-0.0426641595512722
ADCY4	C10orf128	1	-0.0166022400070692
ADCY4	CCM2L	1	-0.0887612032847536
ADCY4	GIMAP7	1	-0.0141075107603118
ADCY4	GIMAP8	1	-0.0178598838023287
ADCY4	HSPA12B	1	-0.0110860138462863
ADCY4	MKL2	1	-0.023255815803372003
ADCY4	PLXND1	1	-0.00542126258364947
ADCY4	RAMP2	1	-0.00440675153318112
ADCY4	ROBO4	1	-0.00324802303030159
ADCY4	SHANK3	1	-0.134377864366999
ADCY4	TENC1	1	-0.00648099155787723
ADCY5	C1orf95	1	-0.0787979896465749
ADCY5	CACNA1C	1	-0.009604493653311159
ADCY5	CACNA1H	1	-0.0348035264483496
ADCY5	CAMK2G	1	-0.0117033057682988
ADCY5	DAAM2	1	-0.0740485863403428
ADCY5	DES	1	-0.0159965059499867
ADCY5	DIRAS1	1	-0.0503489786821974
ADCY5	DPYSL3	1	-0.050214046409212
ADCY5	EPM2A	1	-0.0224900630146402
ADCY5	GNAZ	1	-0.0298804889069927
ADCY5	ITGA9	1	-0.00108391647202538
ADCY5	KCNH2	1	-0.0570602598343416
ADCY5	KIF7	1	-0.10927370939150599
ADCY5	LMOD1	1	-0.109722564297049
ADCY5	MRVI1	1	-0.176230790477335
ADCY5	MYH11	1	-0.0462802416355626
ADCY5	MYL9	1	-0.0103002196961626
ADCY5	PALLD	1	-0.022737828142848002
ADCY5	PDE1A	1	0.0234772793491291
ADCY5	PDZD4	1	-0.00700810521811082
ADCY5	RBPMS2	1	-0.0782319506751785
ADCY5	SLC4A3	1	-0.0373153250068643
ADCY5	SORBS1	1	-0.0944290703101016
ADCY5	SPEG	1	-0.0901796621055288
ADCY5	SYNPO2	1	-0.0644274013574939
ADCY5	TNS1	1	-0.0579332530409333
ADCY5	TTC7B	1	-0.0566942602512862
ADCY7	PSME4	1	0.0113333533437586
ADCY7	TMEM184A	1	-0.006665788859419971
ADCY9	RUSC2	1	-0.0845605137856497
ADCY9	SPIRE1	1	-0.09394033203383499
ADCY9	TCP11L2	1	-0.0344074404699561
ADCY9	TP53BP2	1	-0.022984973007622003
ADCY9	TP53I11	1	-0.0709427622718632
ADD1	PPP1CB	1	-0.0251259640213168
ADD3	BCHE	1	0.0219909993088069
ADD3	CAP2	1	0.00562454803467755
ADD3	STRN	1	-0.0324767125386023
ADD3	TRAM1	1	-0.0112601916402117
ADH7	EPHX1	1	-0.10231621495989099
ADH7	SRXN1	1	-0.0103684540040037
ADH7	WASF1	1	-0.0025831671798329
ADHFE1	CORO6	1	-0.0678012383099898
ADIRF	CTSV	1	-0.0879718485791771
ADIRF	DUSP14	1	-0.0211172328521473
ADIRF	KPRP	1	-0.0758466471165464
ADIRF	PFKFB2	1	-0.0846082113611356
ADIRF	SNCG	1	-0.294935090414997
ADIRF	TP53BP2	1	-0.0022675815913413802
ADK	MTCH2	1	-0.0125268049150323
ADK	OTOP3	1	-0.00564161435700249
ADM	ANKRD37	1	-0.0657475895038525
ADM	BHLHE40	1	-0.0023232146556619103
ADM	DDIT4	1	-0.0037425994732483204
ADM	EDN2	1	-0.0602090838953232
ADM	GADD45B	1	-0.15185236803025798
ADM	ZFP36	1	-0.0615488765298998
ADORA2B	RTKN	1	-0.0621475000501407
ADORA3	CD163	1	-0.0523530062594191
ADORA3	CNR1	1	-0.036940485682952995
ADORA3	GPR34	1	-0.0415735768659542
ADORA3	HCLS1	1	-0.0316350915842112
ADORA3	PNMT	1	-0.0234976255767119
ADORA3	RELB	1	0.0640178340218959
ADORA3	RNASE6	1	-0.064859687354619
ADORA3	SLA	1	-0.0451516136809777
ADORA3	TSC22D3	1	-0.0145457178972571
ADORA3	VSIG4	1	-0.10156799879135199
ADRA2A	KLF15	1	0.0369807009989769
ADRB2	DUSP1	1	-0.00438812415553254
ADRB2	MYC	1	-0.0546427298195185
ADRB2	TRIM29	1	-0.00130205096543673
ADRB2	TSC22D3	1	-0.009900538788285321
AEBP1	DAB2	1	-0.00964944621468887
AEBP1	SULF1	1	-0.0174892808754332
AEN	CEP170B	1	-0.0122219522108955
AEN	DUSP7	1	-0.0151976821095705
AEN	HAS3	1	-0.069325649578966
AEN	IFRD2	1	-0.0450671835151119
AEN	KDM6B	1	-0.0562153825261625
AEN	LRRC4	1	-0.00785184278245119
AEN	MFSD2A	1	-0.0783250144198115
AEN	PPRC1	1	-0.177205506653344
AEN	RRP12	1	-0.0661783216188827
AEN	URB2	1	-0.0319271819173232
AFAP1L1	CLDN5	1	-0.0047690979655556605
AFF4	ARHGEF18	1	-0.0271921201136079
AFF4	B3GNT5	1	-0.0008272530098919481
AFF4	NCOA2	1	-0.011851306068976003
AFF4	OXSR1	1	-0.0516523761466519
AFF4	SNRK	1	-0.022884726039161
AFF4	STRN	1	-0.000129308090249729
AFF4	UGCG	1	-0.0153975297526466
AGAP2	CARD11	1	-0.0350757647083381
AGAP2	CCR5	1	-0.00761309530457162
AGAP2	CD2	1	-0.00769488950521245
AGAP2	CD6	1	-0.0206372234458748
AGAP2	LCK	1	-0.0647236369573849
AGAP2	PTPN7	1	-0.0115726626573573
AGAP2	SCML4	1	-0.0423726205803074
AGAP2	ZAP70	1	-0.0265187894387177
AGFG1	CDH3	1	-0.0195067679366802
AGFG1	FAM107B	1	-0.0258696814816852
AGFG1	R3HDM4	1	-0.0005802469174519389
AGFG1	TGFB1	1	-0.000497201740292363
AGFG1	UBE2Q2	1	-0.0336028495307804
AGL	INPP5A	1	-0.0375296789600101
AGL	ITGA1	1	-0.00675849478324598
AGL	LAMA4	1	-0.0009638195886552019
AGL	NRXN3	1	-0.050823842780852
AGO2	BCOR	1	1.69866267257565e-05
AGPAT1	BRSK2	1	-0.0439483704574996
AGPAT1	DUS1L	1	0.0149270911299584
AGPAT1	MAOA	1	-0.00109605509103326
AGPAT1	TP53I13	1	-0.0301234214635842
AGPAT1	USB1	1	-0.0075804756230898095
AGPAT2	PCDH1	1	-0.036814334539377
AGPAT9	ALDH1A3	1	-0.1035152769937
AGPAT9	AMPD3	1	-0.0750651537824666
AGPAT9	C18orf25	1	-0.0132784774247982
AGPAT9	CHAC1	1	-0.0219731445753964
AGPAT9	DHRS9	1	-0.158842757141537
AGPAT9	DKK1	1	-0.00415962066388219
AGPAT9	FAM107B	1	-0.00475952174566091
AGPAT9	FAM214A	1	-0.0640913059077982
AGPAT9	FBXO34	1	-0.0113031947990646
AGPAT9	HMOX1	1	-0.0050036196516713
AGPAT9	KIFC3	1	-0.0383924333310104
AGPAT9	LMO7	1	-0.0122428699873801
AGPAT9	LNX1	1	-0.0057301881127927706
AGPAT9	LPIN2	1	-0.0265881501299941
AGPAT9	MCU	1	-0.113944100721699
AGPAT9	MYOZ1	1	-0.0033860500864975104
AGPAT9	PTPN3	1	-0.083590867056193
AGPAT9	RNASE7	1	-0.11856075510500001
AGPAT9	SECISBP2L	1	-0.00702621776867501
AGPAT9	SEMA7A	1	-0.0295560091162473
AGPAT9	SNX9	1	-0.0771160252758066
AGPAT9	SPNS2	1	-0.0305755062210145
AGPAT9	TEAD1	1	-0.0203191670864499
AGPAT9	TIMP2	1	-0.00425248595193295
AGPAT9	TP53BP2	1	-0.10080747896809401
AGR2	AGR3	1	-0.0805903517792649
AGR2	ALCAM	1	-0.00956304985633309
AGR2	BPIFB2	1	-0.0695914621057904
AGR2	C6orf58	1	-0.000400872404266062
AGR2	CADPS2	1	-0.00776249817949445
AGR2	EFCAB4A	1	-0.0449253147408498
AGR2	ENTPD8	1	-0.0368372699087924
AGR2	EPCAM	1	-0.0308630822525939
AGR2	FOLR1	1	-0.0527720453667035
AGR2	GOLM1	1	-0.0945821810940962
AGR2	KCNN4	1	-0.012388137258913001
AGR2	KIAA1324	1	-0.0360399999288307
AGR2	LRRC26	1	-0.0112313431112052
AGR2	MLPH	1	-0.0200177508043453
AGR2	MSMB	1	-0.0219564646285488
AGR2	NKX3-1	1	-0.032549604543649
AGR2	PRR15	1	-0.0272152797471227
AGR2	SCGB2A1	1	-0.0722610244251213
AGR2	SCGB2A2	1	-0.0613753537461961
AGR2	SEL1L3	1	-0.0443639585058149
AGR2	SERPINA1	1	-0.0253608085640828
AGR2	SLITRK6	1	-0.0918289889752335
AGR2	SMIM1	1	-0.00715597786481284
AGR2	SPDEF	1	-0.0777591011462797
AGR2	TCN1	1	-0.0387393406778842
AGR2	TFF3	1	-0.0189661565018711
AGR2	TMEM63A	1	-0.0018989209424286801
AGR2	TSPAN1	1	-0.13509154320457098
AGR2	TSPAN13	1	-0.0826712774328744
AGR2	TSPAN8	1	-0.0796339447479083
AGR2	ZG16B	1	-0.0496731205425721
AGR3	ALCAM	1	-0.0334055848989754
AGR3	ANO7	1	-0.0382407726737264
AGR3	BPIFB2	1	-0.0039304766251179
AGR3	C6orf58	1	-0.0171833166671504
AGR3	C9orf152	1	-0.0233452248492018
AGR3	CAPN8	1	-0.0405846865354532
AGR3	CAPN9	1	-0.118505381859485
AGR3	CHAD	1	-0.0808449915205707
AGR3	CHST9	1	-0.0525677133224745
AGR3	CLDN3	1	-0.0674575589348661
AGR3	CREB3L1	1	-0.0799156688186052
AGR3	EFCAB4B	1	-0.0479005127464122
AGR3	ENTPD8	1	-0.0712209772490549
AGR3	GMPR	1	-0.0104604939771082
AGR3	GOLM1	1	-0.07591966467975
AGR3	KAZALD1	1	-0.000154884439825087
AGR3	KCNN4	1	-0.014530953898876002
AGR3	KCNQ1	1	-0.0068889328517325
AGR3	KIAA1324	1	-0.0937774803443384
AGR3	LDLRAD1	1	-0.00263569124654701
AGR3	LINGO1	1	-0.00855966682406164
AGR3	LRP5	1	-0.0040053735991975705
AGR3	MLPH	1	-0.0114833857582343
AGR3	MSMB	1	-0.0893733079676325
AGR3	MUC16	1	-0.0526707656785637
AGR3	NKX3-1	1	-0.0724054079025008
AGR3	PEG10	1	-0.10660354170275699
AGR3	PLEKHB1	1	-0.00628546801001763
AGR3	PODXL2	1	-0.0258347523957032
AGR3	PRR15	1	-0.0482375034748364
AGR3	PTPRN2	1	-0.0532030734950042
AGR3	SCGB2A1	1	-0.208341416442719
AGR3	SCGB2A2	1	-0.0144794254366478
AGR3	SEL1L3	1	-0.0358809550477237
AGR3	SERPINA1	1	-0.0589038380837583
AGR3	SH3RF1	1	-0.0120484570281305
AGR3	SLC12A2	1	-0.0792451803358306
AGR3	SLC45A3	1	-0.072308323404243
AGR3	SLITRK6	1	-0.017452791429114
AGR3	SPDEF	1	-0.0667079435850139
AGR3	TFF1	1	-0.0495258946457156
AGR3	TFF2	1	-0.055970161457884006
AGR3	TFF3	1	-0.0312281922129799
AGR3	TSPAN1	1	-0.0577212042706985
AGR3	TSPAN12	1	-0.00806539204849533
AGR3	TSPAN8	1	-0.0985677563393106
AGR3	VSTM2L	1	-0.0564803187789035
AGRN	JAG2	1	-0.0171703824687543
AGRN	NOTCH1	1	-0.0064569305041907
AGRN	PLXNA1	1	-0.0317290444362615
AGRN	TMEM184B	1	-0.0392088348419745
AGTR1	APBA2	1	0.0123810097539475
AGTR1	BCAT1	1	-0.0388562386493832
AGTR1	DCLK1	1	-0.0103441359955773
AGTR1	EBF1	1	-0.0995155116749607
AGTR1	FHL5	1	-0.0086965922998367
AGTR1	GAS1	1	-0.0179952308885618
AGTR1	GPX3	1	-0.0254056147748495
AGTR1	LMO3	1	-0.11090447865824199
AGTR1	OMD	1	-0.0543850330698321
AGTR1	PID1	1	-0.0234091333052159
AGTR1	SPOCK1	1	-0.0540329052624735
AGTR1	TLR4	1	-0.00199930441254283
AGTRAP	ATAT1	1	0.00225310547829738
AGTRAP	BBS4	1	-0.00260046466471936
AGTRAP	CIRH1A	1	0.0251717003738946
AGTRAP	CLUH	1	0.008300151099450391
AGTRAP	DKC1	1	0.0694379439501438
AGTRAP	DPH2	1	0.00528770658789698
AGTRAP	GBA2	1	0.0189113663073899
AGTRAP	KLF9	1	-0.0399791943614375
AGTRAP	KLHDC8B	1	-0.0222518521273906
AGTRAP	LYAR	1	0.006152387155879521
AGTRAP	MATN2	1	0.0157404080347679
AGTRAP	MSRB1	1	-0.0644690448902963
AGTRAP	NMB	1	-0.0390704996522259
AGTRAP	NNMT	1	-0.0379846728264593
AGTRAP	NOP2	1	0.045095637962333
AGTRAP	SRRT	1	0.0365052512745319
AGTRAP	SRSF7	1	0.0351676992039023
AGTRAP	TMEM173	1	-0.0118781919480607
AGTRAP	TMEM9	1	-0.00992270032404602
AHCYL1	EPHX1	1	-0.10359724994625
AHCYL1	PGM2	1	-0.0106193330004719
AHCYL1	TKT	1	-0.0399043372703874
AHCYL2	ALDH4A1	1	-0.00392449326689501
AHCYL2	CXCL14	1	-0.11317657921401199
AHCYL2	DEPDC7	1	-0.0377074477725482
AHCYL2	DSG1	1	-0.0279392493575908
AHCYL2	IP6K2	1	-0.0755703671501791
AHCYL2	LRRC4	1	-0.00523730289273885
AHCYL2	MRC2	1	-0.0254637191413705
AHCYL2	PLA2G4F	1	-0.0043163140894557
AHCYL2	SPTLC3	1	-0.026780729416705003
AHDC1	BICD2	1	-0.0174066853591136
AHDC1	EFNA4	1	-0.0143856768767918
AHDC1	FGFR3	1	-0.00932121380894454
AHDC1	FOSL2	1	-0.0790328036885911
AHDC1	HYAL2	1	-0.00257315081312459
AHDC1	MKNK2	1	-0.10240125467964802
AHDC1	NUMBL	1	-0.0114717577777422
AHDC1	SEMA3F	1	-0.11366063201065499
AHDC1	SLC2A1	1	-0.159579574806575
AHDC1	SOX15	1	-0.01662890087721
AHDC1	TKT	1	-0.00198506946740476
AHDC1	ZBTB7C	1	-0.0337988271121213
AHSA1	AUP1	1	-0.0351550477093066
AHSA1	CCT2	1	-0.0184445470159867
AHSA1	CHMP6	1	0.040010333910391
AHSA1	CNPY3	1	-0.0458226099396477
AHSA1	CRELD1	1	-0.074311052304051
AHSA1	CRYAB	1	-0.0854305075837778
AHSA1	CTSO	1	0.00692389087663394
AHSA1	CYGB	1	0.0170665167662228
AHSA1	DENND4B	1	-0.0339698192667402
AHSA1	DFNB31	1	-0.00168527269871565
AHSA1	DHPS	1	-0.0435294456702251
AHSA1	DPAGT1	1	-0.0516792171335616
AHSA1	GDAP1	1	0.0270143976227908
AHSA1	HCCS	1	-0.0333576313488883
AHSA1	HNRNPA2B1	1	-0.0960972950145544
AHSA1	HNRNPH3	1	-0.00258737313252858
AHSA1	HSF4	1	-0.00623576803304513
AHSA1	HSPA2	1	-0.00784626960116924
AHSA1	HSPH1	1	-0.11070701832572599
AHSA1	IGSF8	1	-0.00206958705866115
AHSA1	ILK	1	-0.0774414937136503
AHSA1	IMPACT	1	0.077829172622218
AHSA1	KAT2A	1	-0.0595025422020236
AHSA1	LYRM9	1	0.0037537322193206104
AHSA1	PDIA6	1	-0.0239156152336056
AHSA1	PLEKHG1	1	0.0118646686579911
AHSA1	PRKCD	1	-0.00145610442782188
AHSA1	PTER	1	0.008055601485772891
AHSA1	PTOV1	1	-0.08000601807163499
AHSA1	SCFD2	1	-0.00901185966706156
AHSA1	SLC22A17	1	-0.0410219333263925
AHSA1	SPR	1	-0.038302966548665
AHSA1	STXBP6	1	-0.00048122023931574005
AHSA1	TMEM173	1	0.0483411527690203
AHSA1	TRIB3	1	0.0470982236367657
AHSA1	TUBA4A	1	-0.0161061121585619
AHSA1	UFL1	1	0.0747603876774236
AIF1	C1QA	1	-0.0615366768281786
AIF1	C1QB	1	-0.0328591385526599
AIF1	C1QC	1	-0.0506945600612703
AIF1	CD4	1	-0.00667859121506323
AIF1	CLEC10A	1	-0.0100183916975439
AIF1	CSF1R	1	-0.0698798907695578
AIF1	CYBB	1	-0.129528877382059
AIF1	F13A1	1	-0.00664222498679671
AIF1	HCK	1	-0.0114424638829306
AIF1	ITGB2	1	-0.120577321231518
AIF1	LST1	1	-0.048797927132687
AIF1	MNDA	1	-0.0829571306801203
AIF1	SPI1	1	-0.10889677727600601
AIF1	TYROBP	1	-0.19088949250755802
AIF1L	CAPN5	1	-0.0301702581129278
AIF1L	EPS8L2	1	-0.00430871467380217
AIF1L	FAM222A	1	-0.0220672854321112
AIF1L	KRT78	1	-0.097016901271127
AIF1L	MROH6	1	-0.030978075346557006
AIF1L	NUP214	1	-0.123548309137199
AIF1L	PSCA	1	-0.0296204765673641
AIM1	GALNT1	1	-0.000182989165832148
AIM1L	C1orf116	1	-0.0422472593595822
AIM1L	GEMIN5	1	-0.00704519330092112
AIM1L	METRNL	1	-0.0420061453257788
AIM1L	PRDM1	1	-0.0209085363489342
AIM1L	SAMD9L	1	-0.0412116400021965
AIM1L	SERPINB2	1	-0.0501857959090807
AIM1L	TMTC3	1	0.0205572327475838
AIM2	BANK1	1	-0.0396304139597201
AIM2	CARD11	1	-0.13297061449257902
AIM2	CD19	1	-0.000579026137027535
AIM2	P2RX5	1	-0.0722336593270963
AIP	AMN	1	-0.0023281223359154102
AIP	ATRN	1	0.0314154913307355
AIP	C10orf137	1	0.0855898028773373
AIP	C12orf57	1	-0.0606515406829162
AIP	C14orf159	1	-4.48240018350865e-05
AIP	C16orf13	1	-0.0167143735809447
AIP	CNPY3	1	-0.10500031165517099
AIP	COMMD6	1	-0.0118967196979847
AIP	CRTAP	1	-0.0111163852902296
AIP	CRTC2	1	-0.00217578132118997
AIP	DYNC1LI2	1	0.0252288587702184
AIP	ECSIT	1	-0.184972588218874
AIP	FUZ	1	-0.114892089956659
AIP	FXR1	1	-0.0395459578990315
AIP	GPX4	1	-0.0146288123213603
AIP	GRB7	1	-0.0181174255071756
AIP	GSAP	1	0.00999304000504808
AIP	HADH	1	-0.008272495218780679
AIP	HIBADH	1	-0.0683629161834568
AIP	HSF1	1	-0.0833702381227045
AIP	KCNK1	1	-0.0144452724583199
AIP	LAMB2	1	-0.0645411199139624
AIP	LAMB3	1	-0.0022685199899480602
AIP	MAOA	1	-0.0714428690011679
AIP	MGST2	1	-0.0583232637392143
AIP	MRPL34	1	-0.0146268303561556
AIP	NHLRC3	1	0.06495997759208201
AIP	PAFAH1B3	1	-0.0490047424687466
AIP	PDK2	1	-0.0011881697378851698
AIP	PHF1	1	-0.124022289569115
AIP	PLOD1	1	-0.0501457466927155
AIP	PNKD	1	-0.0396501393983447
AIP	PTOV1	1	-0.010101396061706
AIP	PTTG1	1	-0.0702089378521466
AIP	RHBDD3	1	0.0385246055000499
AIP	RNASEH2C	1	-0.009558070979402991
AIP	RPS6KA1	1	-0.0108206149448548
AIP	SPR	1	-0.157746082640739
AIP	SQSTM1	1	-0.0388860927795754
AIP	STOML1	1	0.00268686229035936
AIP	STXBP5	1	0.0141327412707199
AIP	TARBP1	1	0.0415114651876846
AIP	TKT	1	-0.0610558998134499
AIP	TMEM102	1	-0.00453547343706658
AIP	TMUB1	1	-0.0130232327805782
AIP	TP53I13	1	-0.0224539216641845
AIP	WLS	1	-0.0802247288629777
AIP	XPO5	1	0.0406701132555586
AIP	ZNF358	1	-0.05009389090724901
AIP	ZNF75A	1	0.0215706157053168
AIP	ZNF839	1	0.0534855517029512
AJUBA	FJX1	1	-0.0329769651551162
AJUBA	SGK223	1	-0.0337896853770312
AJUBA	SLC20A2	1	-0.000657152451637368
AJUBA	SRF	1	-0.0286050468025468
AJUBA	TMEM237	1	-0.0154039588629103
AKAP12	C11orf96	1	-0.0304642693215055
AKAP12	CREM	1	-0.0374330338340198
AKAP12	NR4A3	1	-0.132028276754904
AKAP12	RHOBTB3	1	-0.00047350861046451697
AKAP12	RNF122	1	-0.11012444519199001
AKAP2	CYYR1	1	-0.0274857942439962
AKAP2	TEK	1	-0.0247570992839144
AKAP7	FAM160B2	1	0.0319274591555522
AKAP8L	KLHL17	1	-0.02083622030866
AKAP8L	MEIS1	1	-0.00794410905581578
AKAP8L	NR2C2AP	1	0.0116502314835316
AKAP8L	PGP	1	-0.0312507979670928
AKAP8L	RCOR3	1	-0.06384622708106599
AKAP8L	RDH11	1	-0.00204980050453356
AKAP8L	SDC4	1	0.00171091190027947
AKAP8L	SRRM2	1	-0.0104817685775542
AKAP8L	TRAFD1	1	-0.0380920845509954
AKAP8L	TRIB1	1	0.0231915083461873
AKT3	CALCOCO1	1	-0.0866641970950983
AKT3	CBX7	1	-0.0132792826670439
AKT3	CELF2	1	-0.000298411002839642
AKT3	EFHD1	1	-0.0133160378103074
AKT3	HSD17B11	1	-0.0350713147082596
AKT3	MAMDC2	1	-0.0238336240905803
AKT3	RAI2	1	-0.0654058699770824
ALAD	DAPK3	1	-0.00536207337721175
ALAD	GSAP	1	0.0123844432978427
ALAD	HK1	1	-0.0751047379397464
ALAD	HS1BP3	1	-0.00491246388272937
ALAD	KIAA0195	1	-0.0931217243735068
ALAD	MAK16	1	0.0224087238204001
ALAD	MAOA	1	-0.0194141536358623
ALAD	MTSS1L	1	-0.00443685557510757
ALAD	NCOA5	1	0.0160535431250298
ALAD	NUMBL	1	-0.00893878309474223
ALAD	TKT	1	-0.0269160311902479
ALAD	USP35	1	-0.0605745806896969
ALB	APOA1	1	-0.215948678365228
ALB	APOA2	1	-0.275598291032421
ALB	APOC3	1	-0.298227350956178
ALB	FABP1	1	-0.104085863687767
ALB	FGA	1	-0.134228746635518
ALB	FGB	1	-0.212222570422127
ALB	FGG	1	-0.150282294943273
ALB	RBP4	1	-0.0912715683820241
ALCAM	ALDH1A1	1	-0.0240479938393444
ALCAM	AQP5	1	-0.0220016264889928
ALCAM	C9orf152	1	-0.0837785168674569
ALCAM	CREB3L1	1	-0.0403758866256064
ALCAM	EPCAM	1	-0.134866622411462
ALCAM	GPT	1	-0.0471005512191894
ALCAM	KIAA1324	1	-0.0247868953572112
ALCAM	PRR15	1	-0.0391867109679446
ALCAM	TSPAN1	1	-0.0131613964724679
ALCAM	TSPAN12	1	-0.116225485033546
ALDH18A1	EPCAM	1	-0.11995835766707999
ALDH18A1	RPS6KA2	1	0.0399855619186211
ALDH1A1	ALOX15B	1	0.012434138398129999
ALDH1A1	C9orf152	1	-0.0649613083271483
ALDH1A1	FA2H	1	-0.0270677158617369
ALDH1A1	MYO5A	1	0.0358949113616175
ALDH1A3	B4GALT1	1	-0.0309011894241017
ALDH1A3	CDC42EP5	1	-0.0789659235732775
ALDH1A3	CTSV	1	-0.0156412908299556
ALDH1A3	EEF1A2	1	-0.0820568224346263
ALDH1A3	FAM107B	1	-0.0475084680069296
ALDH1A3	GAB2	1	0.0616241936324773
ALDH1A3	GCHFR	1	-0.049926625421767
ALDH1A3	IL36A	1	-0.009226006837531029
ALDH1A3	LPIN2	1	-0.0152396099521193
ALDH1A3	MCU	1	-0.0352646239319509
ALDH1A3	PCSK5	1	-0.0305974989258647
ALDH1A3	PLSCR1	1	-0.00157065528194908
ALDH1A3	PRSS22	1	-0.0469478169835064
ALDH1A3	SEMA7A	1	-0.0378613315862022
ALDH1A3	SPNS2	1	-0.0477911714541234
ALDH1A3	TIMP2	1	-0.0565130135523298
ALDH1A3	TMPRSS2	1	-0.0457957027398128
ALDH1A3	WASL	1	-0.028147713977700998
ALDH1L1	DSG1	1	0.0693276649597427
ALDH1L1	DSP	1	0.0668730481530956
ALDH1L1	SERPINE2	1	0.0107790108721489
ALDH1L1	SMIM22	1	-0.0055801737015272294
ALDH1L1	TMCO4	1	-0.00941353223023989
ALDH1L2	AMPD2	1	0.0425634494350768
ALDH1L2	BAMBI	1	-0.13463377487018
ALDH1L2	CENPT	1	0.0238622444354461
ALDH1L2	CLIP2	1	0.0342485122270965
ALDH1L2	EPRS	1	-0.046667434010130994
ALDH1L2	GARS	1	-0.0463446885751967
ALDH1L2	HSPA13	1	-0.0663141593831574
ALDH1L2	LDHB	1	3.1051804772475e-05
ALDH1L2	NARS	1	-0.00244339777757913
ALDH1L2	PCK2	1	-0.17274290258924302
ALDH1L2	PTER	1	-0.0442461456917579
ALDH1L2	PTOV1	1	0.0542979781725185
ALDH1L2	PXK	1	-0.0567086846528167
ALDH1L2	PYCR1	1	-0.10538936866824002
ALDH1L2	RHBDD1	1	-0.0987872679896507
ALDH1L2	STC2	1	-0.14967935173675
ALDH1L2	TRIB3	1	-0.0553502186914515
ALDH1L2	WDR41	1	-0.003698541430943
ALDH1L2	XBP1	1	-0.0670902690844706
ALDH1L2	ZBED3	1	-0.0938338258094318
ALDH2	C9orf3	1	-2.2223447927627302e-05
ALDH2	CYB5R1	1	-0.0140581477879696
ALDH3A1	ALDH3A2	1	-0.0131393047788922
ALDH3A1	EPHX1	1	-0.0543182604633077
ALDH3A1	G6PD	1	-0.0892225604400392
ALDH3A1	PIR	1	-0.0006853711630009099
ALDH3A2	EPHX1	1	-0.0571409239030641
ALDH3A2	SRXN1	1	-0.0197148110390721
ALDH4A1	B4GALNT3	1	-0.0350612892240388
ALDH4A1	C11orf45	1	-0.0252235740304391
ALDH4A1	CDIP1	1	-0.191777788161088
ALDH4A1	CLSTN1	1	-0.0614258915245638
ALDH4A1	COL7A1	1	-0.15049329140403303
ALDH4A1	CORO1C	1	-0.0320034527545359
ALDH4A1	CXCL14	1	-0.0506470589512836
ALDH4A1	DOC2A	1	-0.0149312011806931
ALDH4A1	EFNB1	1	-0.130133834962015
ALDH4A1	ELF4	1	-0.0129351355041058
ALDH4A1	ETV6	1	0.10213676818836698
ALDH4A1	F12	1	-0.0009528526274042539
ALDH4A1	FAM83G	1	-0.0329697890463925
ALDH4A1	GPR153	1	-0.011412402913276002
ALDH4A1	INF2	1	-0.0854742246541973
ALDH4A1	MAPKBP1	1	-0.0208714343221513
ALDH4A1	MOB3C	1	-0.0442828379486216
ALDH4A1	MRC2	1	-0.026026809121682003
ALDH4A1	NINJ1	1	-0.0877705523360962
ALDH4A1	NISCH	1	-0.0383292243673193
ALDH4A1	NLRP1	1	-0.0171555504294111
ALDH4A1	NOTCH1	1	-0.000979842336982076
ALDH4A1	NSUN7	1	0.0356062547817915
ALDH4A1	OTOP3	1	-0.009631752305861191
ALDH4A1	PDK2	1	-0.0148362554859999
ALDH4A1	SEC11C	1	0.00134307238966826
ALDH4A1	SLC7A1	1	-0.000971001879967112
ALDH4A1	SOX12	1	-0.0216223629186635
ALDH4A1	TCP11L1	1	-0.00950742978215652
ALDH4A1	TP53AIP1	1	-0.0357014237255027
ALDH4A1	TRIM17	1	0.0665936877720898
ALDH4A1	USH1G	1	-0.12499839018572699
ALDH9A1	PPIC	1	-0.0362440761916729
ALKBH7	C12orf57	1	-0.0513884564614797
ALKBH7	CLASRP	1	0.0370846276259851
ALKBH7	COMMD6	1	-0.11534942263209401
ALKBH7	EIF1B	1	-0.00716434916542092
ALKBH7	ESD	1	-0.0725064378452331
ALKBH7	FXYD3	1	-0.0299817895935869
ALKBH7	MGST3	1	-0.00958566398199089
ALKBH7	MRPS12	1	-0.00647619511836879
ALKBH7	PNN	1	0.0823576290959932
ALKBH7	PPDPF	1	-0.0765575904553538
ALKBH7	RPP25L	1	-0.00266170590104203
ALKBH7	SRSF11	1	0.0907268210030414
ALKBH7	TMEM219	1	-0.0899433981780594
ALKBH7	TRAPPC6A	1	-0.0153259494626778
ALOX12	KIF21A	1	-0.0179712998906398
ALOX12	RPS6KA2	1	0.00124095551960424
ALOX12	SCNN1A	1	0.0253119678759731
ALOX12B	ALOXE3	1	-0.430752495127325
ALOX12B	CPVL	1	0.0050075286442706705
ALOX12B	DLX3	1	-0.00614575418007629
ALOX12B	FAM43A	1	-0.0190675112262125
ALOX12B	SDR9C7	1	-0.0135986125304707
ALOX12B	SLC27A4	1	-0.0107432426970347
ALOX12B	VSIG8	1	-0.0062473792454896
ALOX12B	WFDC5	1	-0.0630747616912711
ALOX5AP	C1QB	1	-0.0497930422699627
ALOX5AP	C1QC	1	-0.0295785945176839
ALOX5AP	HCLS1	1	-0.0008222793978277731
ALOX5AP	ITGB2	1	-0.0507724757952786
ALOX5AP	LAPTM5	1	-0.107933426776421
ALOX5AP	LCP1	1	-0.0542837577084306
ALOX5AP	TYROBP	1	-0.0634806026202904
ALPK3	DUOXA2	1	-0.021684596392663995
ALPK3	FAM214A	1	-0.0118579479496179
ALPK3	LNX1	1	-0.0375937679112507
ALPK3	PTK2B	1	-0.000120601846025581
ALPK3	TGFA	1	-0.0489793741314729
ALPK3	WASL	1	-0.0291880023424367
ALPL	ENG	1	-0.0175552458884581
ALPL	GPR97	1	-0.0367273927563775
ALPL	KDR	1	-0.0237062998705634
ALPL	S1PR1	1	-0.0362321961458983
ALPL	SLCO2A1	1	-0.10672182311963199
ALS2CL	DUOXA1	1	-0.0274083694098131
ALS2CL	NBEAL2	1	-0.134171008379224
ALS2CL	RECQL5	1	-0.00936963856248379
ALS2CL	TMEM184A	1	-0.0742763710670684
AMACR	CMAS	1	-0.0307097024735159
AMACR	GLUL	1	0.0182101212689811
AMACR	ISG20	1	-0.0707133557237517
AMACR	KIF21A	1	-0.125535156676079
AMACR	LYN	1	0.0248272734050926
AMACR	MTCH2	1	-0.0306405370523821
AMACR	PKP3	1	-0.00116956367693989
AMACR	S100P	1	0.0028616009592310103
[truncated: 55,698 more rows]

## Sheet: Esophagus − Muscularis
Name1	Name2	Edge type	Edge weight
[truncated: 77,616 more rows]

[truncated: 9 more sheets: Fibroblasts, Heart, Lung, Nerve − Tibial, Skeletal Muscle, Skin − Not Sun Exposed, Skin − Sun Exposed, Thyroid, Whole Blood]
