# Supplementary material for: Co-expression networks reveal the tissue-specific regulation of transcription and splicing
Source: Genome Res. 2017 Nov;27(11):1843–58. doi: 10.1101/gr.216721.116 (PMC5668942; doi:10.1101/gr.216721.116)
Supplement: Supplemental Material [file supp_gr.216721.116_Supplemental_Data_S2.xlsx]

## Sheet: readme
																																																	This file contains 4 types of hubs (ordered) in each tissue.
																																																	1st column contains the hub name
																																																	2nd column contain the number of distinct neighbor genes.
																																																	3rd column contains the neigbor genes.

## Sheet: Adipose − Subcutaneous (TE-TE)
CDH5	62	DOCK9;PAQR4;TUSC3;NUAK1;TSPAN13;KIF26A;CD93;SH3BP4;DACH1;KIF17;CLEC14A;RAPGEF2;PTPRK;CD2AP;PAXBP1;SGK223;MAML3;FZD6;ARHGAP31;MECOM;MYH9;PEAR1;GNG11;ARHGDIB;KDR;TMEM123;TCF4;PDGFB;LRRC8A;ZBTB46;LRRC8C;ENG;PKN3;PRSS23;ELTD1;HOXB7;FAM69B;IFRD2;TPD52;GLMN;THOC1;TSPAN9;SHANK3;CCDC85A;BMP6;RPS6KA2;MTPN;PCDH1;GPIHBP1;ROBO4;PDE2A;ELK3;CMTM8;ERG;PPP1R13B;ESAM;CTNNBIP1;CLK1;GIMAP4;APP;CTTNBP2NL;MYO10
CYYR1	62	MORC3;EHD4;EMCN;TGFBR2;THSD7A;CD59;KIF26A;SH3BP4;PDE9A;ERG;ARL15;EED;FAM13C;TESC;A2M;JRKL;PLVAP;HDGFRP3;ARHGAP31;NPDC1;SMG9;ARHGEF3;MKL2;LPCAT4;LSR;FAM110D;ZNF423;ANKRD29;NR3C2;HEG1;KCTD12;RUFY3;FLI1;ELTD1;RAMP3;HOXB7;LDB2;ENO2;PPM1D;CMIP;TSPAN7;TEK;GIPC2;MFSD6;TACR1;FRMD3;EPAS1;DNAJA4;CFI;CCM2L;CADPS2;TMEM88;FCHSD2;KL;MEF2C;ELK3;SPNS2;BMPR2;YJEFN3;TMTC1;GUCY1B3;C5orf54
TSPAN7	61	CD74;NPDC1;MYRIP;ZDHHC12;TSPAN12;CD34;SPARCL1;TACR1;OLFM1;ERG;LIFR;DARC;TMTC2;MCTP1;ALDH1A2;PLVAP;HLA-DRA;HDGFRP3;ECSCR;ELK3;TIAM1;ST6GAL1;ARHGEF3;LRRC1;CCDC93;RGS5;ARHGDIB;PARM1;PTPRB;FLYWCH2;PDIA5;MKL2;PRKCH;PLCB4;ITGB4;PLAT;KCTD12;MYCT1;MMP28;FLI1;HOXD1;CYYR1;FAM69B;IGFBP7;GIMAP4;GIPC2;KCNAB2;ANKRD29;FRMD3;EPAS1;PCDH19;CFI;CD93;C10orf128;FAM107A;ARHGAP31;ITM2A;SCN1B;PNMT;C5orf54;CRIP2
KCNH2	60	LGR6;DIRAS1;CKB;GNAO1;MSRB1;PRKAA2;SHROOM3;CHRDL2;NCKAP1L;BCHE;LGI1;TRPC4;HMCN2;ITIH1;TMEM158;ITGB1BP2;ASB2;ITM2C;LINGO1;NCALD;TMEM35;CPNE6;ADRA2C;HTR2A;MAPK4;SLC8A1;MSX1;MYRF;SYNDIG1;RBM38;HSD17B6;PI15;EPM2A;HAPLN2;SYNM;HSPB3;ZBTB7C;C1orf226;WNK2;METTL24;MCHR1;NCS1;HOXC11;SMTN;PPP2R2C;FAXC;WFDC2;HPD;RAB9B;RAB33A;TMEM61;VPS13A;CCDC81;DKK2;TCEAL1;PCDH7;FAT3;PRKACB;LNP1;CFL2
DCN	56	AUTS2;PPAP2B;ZFHX4;NOVA1;OLFML3;DCLK1;CELF2;PDGFRL;TENM1;MFAP4;AKAP13;CORO2B;ITIH1;FBLN2;LOX;CACNB4;PAM;FBLN5;ITGBL1;FAM180B;CPA3;CALHM2;FNDC1;EVC2;FSTL1;DBN1;FMOD;CYBRD1;CITED1;RGMA;PI16;LAMA2;LTBP4;LTBP2;TPST1;VIT;MRC2;FBN1;C1S;PCDHGC3;IGFBP6;ABI3BP;MMP27;SMAD3;ZEB1;ANGPTL5;OMD;S100A13;DKK1;CILP;ITM2A;GPR133;GAS1;LPAR1;ABCC1;COL12A1
HSD17B6	56	CYFIP2;GNAO1;RASSF3;PRKAG2;MSRB1;NCS1;JPH2;ITIH1;TRPC4;P2RX1;TCEAL1;ITGB1BP2;ASB2;FAT3;SAMD14;RYR2;MPP7;SGCA;ADRA2C;SORBS1;HTR2A;WIPF3;MAPK4;REEP1;PCDH20;PI15;DES;SLC38A1;HSPB3;CAMK2G;CHRDL2;TSPAN2;SLC8A1;RASL11B;CFL2;SMTN;GATA6;WFDC2;USP35;SLC20A2;SELM;RAB9B;FAXC;KCTD15;KCNH2;CCDC81;ETV6;HOXC11;RNF180;SHROOM3;PCDH7;ITM2C;PRUNE2;METTL24;NXPH3;LNP1
ARHGDIB	56	SOX13;TGFB1;EFHD1;MYRIP;TTLL4;RABGAP1;ANO1;SPARCL1;INPP4B;CD4;PTK2;CLEC14A;SEPT8;EPS8;ARHGAP6;RASAL2;PAXBP1;SMAP2;DPYD;MYH9;PEAR1;GNG11;RGS5;REM1;PYCARD;NDUFA4L2;CDH5;PACSIN2;RRAGD;SLC44A2;LRRC8A;ZNF362;HOXB7;PAQR4;IGFBP2;FAM69B;IGFBP7;DACH1;THOC1;CACNA2D4;FRMD3;NCK2;FAM162B;COX4I2;FBXL3;CD93;TSPAN7;NOTCH3;FAM107A;PTPRB;ESAM;RCSD1;MYO10;PTPRK;GPSM3;CRIP2
FSTL1	54	STIM1;PDGFRA;ELN;FBLN2;HDAC7;AOX1;ZFHX4;OLFML3;VCAN;AKAP13;DBN1;COL3A1;LOX;CD248;PAM;DCN;CDK18;CLEC3B;RPS21;NID1;SLIT3;PXN;BSG;PI16;ARHGEF10;LAMA2;HSPG2;CUTC;VIT;TPST1;CD34;CTSD;FBN1;COL5A2;C1S;PCDHGC3;PIGT;SMARCD2;TRIP10;LAMC1;ZEB1;FGFR1;CAB39L;DCLK1;DNMBP;PENK;CCDC80;UBTD2;COL5A1;COL1A2;ANPEP;GPR133;WNT2;STK38
DBN1	52	CMTM3;CD70;ANXA4;DCLK1;ITGA11;TTC7A;STXBP6;PPL;LTBP2;DCN;FAM180B;PCNXL2;SCARA5;ZNF385B;FMNL1;PAMR1;EVC2;FSTL1;PDE7A;PXN;DLGAP4;FGF16;VASN;DIAPH1;CALHM2;METRNL;UAP1;LMX1A;NHSL1;FBN1;AGAP1;PCDHGC3;IGFBP6;ADA;ATP2B1;ITPR3;MMP27;ACAP3;SEMA3C;GALNT12;ZDHHC7;OMD;CDS1;SLC17A7;DKK1;ANGPTL5;EMP3;GPR133;EMP1;PALM;SNX21;GAS7
HEG1	52	EFHD2;NPDC1;NOVA2;KIAA1671;PODXL;MUS81;ADAM15;RAPGEF2;MEOX1;TEK;GOLIM4;ELK3;SLC9A3R2;EML1;ELF4;HSPA12B;LSR;JAG2;ST3GAL2;CLIC5;TMTC1;EPHB4;PKN3;WNK1;NHSL2;CYYR1;MTPN;MGAT2;GLMN;THBD;ELFN1;FAM171A1;ADCY4;SH3BP4;AIF1L;GIMAP6;CCM2L;PCDH1;APP;ADCY9;NRARP;ARHGAP31;UTRN;ZNF423;PITPNM3;FAT4;CLK1;ZMIZ1;C5orf54;KLC4;CD109;CRIP2
TYROBP	50	ACP5;NCKAP1L;CD53;LAPTM5;HCST;SORBS2;RNASET2;IQGAP2;LY86;SPI1;MPP1;GPR183;CD86;NPC2;PIK3R5;PIK3AP1;TTYH3;MNDA;PYCARD;MSR1;PARVG;ATP6V0B;ITGB2;TBXAS1;TFEC;GLIPR1;MFSD1;RNASE6;SLAMF8;IFI30;KCNAB2;FERMT3;CYBA;SH3BGRL;LCP1;NCF2;PTPN6;CPVL;RPS6KA1;NPL;PLD3;VAMP8;RBM47;C1QC;C1QB;WDFY4;C3AR1;SASH3;FUCA1;KDM5B
TPM2	50	RASL12;ACTG2;RASSF3;FAM46B;ILK;JPH2;NTF3;DNAJB5;TEAD3;TCEAL1;MYL9;ASB2;ATP2A2;PDLIM7;ARHGEF9;CAP2;PRKG1;NEXN;REEP1;SLC26A10;HMG20B;PPP1R12A;CACNA1H;MRVI1;FAM19A5;PRKAB2;RASL11B;WDR1;RAMP1;CAMK2G;KCNAB1;TSPAN2;CSRP1;SMTN;WFDC1;CALD1;SORT1;TAGLN;AKAP6;SGCA;CNN1;EDIL3;RBPMS;NPNT;PALLD;PRUNE2;PRKAG2;WIPF3;FLNA;LMOD1
CILP	50	CD34;RECK;PPAP2B;CALHM2;OLFML1;SCG5;OLFML3;DCLK1;ECM2;ZFHX3;PDGFRL;MFAP4;SAMD4A;FBLN2;MMP27;GSN;DCN;FAM180B;SERPINA5;SCARA5;WISP2;TPST1;FAM46A;PAM;FGF18;PXN;VIPR1;CST3;RGMA;PI16;IL17D;LTBP3;LTBP2;SSC5D;RASSF5;MRC2;IGFBP6;ADA;CORO2B;COL16A1;RNF19A;BSG;OMD;SRRM2;ZFHX4;ANGPTL5;MGP;VIT;GAS1;ABCC1
REEP1	48	ITGA8;SYNM;TMOD1;RASL12;DES;MSRB1;NCS1;KCNMA1;JPH2;CAP2;LDOC1;ITGB1BP2;ASB2;ARHGEF9;TMEM35;RYR2;MPP7;TPM2;SGCA;PRKG1;SLC8A1;MYL9;DGKG;HSD17B6;LNP1;DBNDD2;NTF3;HSPB3;PDLIM3;WNK2;KCNQ4;RAMP1;PRKAA2;TSPAN2;COL4A5;RAB9B;DTNA;GATA6;WFDC2;AKAP6;PCDH20;CASQ2;GRIK5;NPNT;RBM24;PRUNE2;NXPH3;FLNA
SH3BGRL	48	C9orf16;CTTN;RASSF3;C12orf5;DBNDD2;LAPTM5;B2M;EFHD1;RGS19;NLRC4;ADRA2C;MYL9;CACNA1H;NPNT;LBR;NPTN;TYROBP;NCKAP1L;DNAJB5;CD86;PRKG1;CRMP1;FEM1B;DGKG;PPP1R14A;ATP6V0B;LPHN3;GLIPR1;KCNAB1;KCNAB2;TCEAL1;CYBA;GRN;CALD1;BTAF1;TAGLN;TM6SF1;PPP1CB;PIP4K2A;EDIL3;RNF180;TCN2;C1orf162;ARHGAP32;PRKACB;SORT1;TMEM47;LMOD1
CLEC14A	48	MYRIP;TTLL4;CDKN1B;PLK2;SPARCL1;SH3BP4;KIF17;IFIT5;THOC1;MEOX2;PLVAP;NEDD9;MECOM;S1PR1;ZBTB18;CMTM8;TMCC3;PELO;LSR;ARHGDIB;CDH5;PTPRB;PRKCH;LRRC8C;ENG;CDC42EP3;MYCT1;HOXB7;IRF2BPL;FAM69B;GIMAP4;GIMAP5;GIPC2;TSPAN9;GATA2;KCTD12;APP;CD93;POGZ;TPD52;MEF2A;PPP1R13B;ESAM;PRSS23;FAM117A;PTPRK;AVPR2;FOXC1
TACC1	47	DOCK9;TIMP3;SESN1;PPAP2A;SLC7A2;CYP4B1;LIMS2;SRGN;FOXO1;LDLRAD4;LIFR;ATP9A;RAPGEF3;ELF1;EDNRB;RASAL2;FAM83G;PARM1;SDPR;PELI1;ZBTB16;P2RY14;MAP3K6;THEMIS2;CST3;MBNL2;FLYWCH2;KLF9;PACSIN2;LAMA3;ANGPTL1;LNX1;ATP10A;WNK1;LRRC1;IGFBP3;CAB39L;BMP2;CEPT1;ROCK2;FAM107A;PTPRB;TMTC1;SYBU;BAIAP2;NAB2;GLCCI1
CUTC	47	AMOTL1;EPHX1;PDGFRA;CCDC80;AOX1;OLFML3;GAB2;ECM2;IKBKB;CNTN3;FABP4;KLF11;WASF3;SELENBP1;PDE1B;ASPH;MKL1;NTRK2;FSTL1;DENND3;CNOT8;PXN;PIK3R1;ANGPT1;SLCO4A1;TSC22D3;KLF9;NFKBIA;ARHGAP10;TLDC2;LGALS3BP;TNIP1;MMP28;CLU;COL5A2;BSG;SLC40A1;SDC3;USP53;TEX30;CLEC3B;ANPEP;PARD3B;C1S;BCL6;ABCC2;SMARCD2
CD3E	46	KLRB1;ANO9;MYO1G;SH2D1A;ITGA4;CD5;CD6;CD7;CD2;IKZF1;MS4A1;SEMA4D;TRAT1;FAM46C;CD3D;CERKL;GRAP2;ZAP70;CXCR4;LIMD2;NUP210;CST7;CD8A;TCF7;SKAP1;CD48;TMC8;CD27;LY9;ACAP1;LTB;DENND1C;GZMA;RASGRP1;ITK;TAGAP;GZMM;C11orf21;RLTPR;GZMK;RUNX3;PTPRC;SPOCK2;GPR171;TBC1D10C;LCK
FBN1	46	RECK;CD70;NOVA1;PCSK6;ECM1;PCOLCE2;ITGA11;CORO2B;DBN1;SPSB4;ADAMTS5;MRC2;SCARA5;WNT10B;TPST1;FNDC1;EVC2;FSTL1;TPPP3;PXN;DACT2;PI16;FGF16;DCN;TRIO;RPS21;VCAN;LMX1A;NHSL1;PCDHGC3;C1QTNF3;TRIP10;ABI3BP;MMP27;FBLN2;SEMA3C;CXCL3;PLEKHG4;DNMBP;PENK;ISLR;DKK1;COL1A2;GPR133;WNT2;GFPT2
ALCAM	46	CD52;C9orf16;MAP4K3;ASPHD1;DOCK3;IGSF6;ZNF219;C12orf5;ST14;IL24;TREM2;F13A1;CD9;MSR1;TBC1D8;NCEH1;SPINT1;CCDC88A;GCLC;PLA2G7;TFRC;TNNI2;GLA;SPOCD1;LIPA;RPS6KA1;C1orf228;CTSD;IFI30;AQP9;KCNN4;TNFRSF11A;TREML1;IL1RN;HEXB;STX4;TCIRG1;DCSTAMP;SPP1;MYO9B;SLAMF9;PSEN2;SLC1A4;IFITM10;MATK;CD300LB
SPI1	45	CD53;NCKAP1L;NCF2;MYO1F;SASH3;CCR1;STXBP2;SH3BP1;PIK3AP1;FYB;ADAP1;TYROBP;PPT1;NCF4;PIK3R5;PTPN6;DOK2;DOK3;CARD9;MNDA;PYCARD;LYN;NRROS;PLCB2;ITGB2;GLIPR1;HK3;IFI30;FERMT3;CYBA;TNFRSF11A;HCK;LCP1;PLEK;CYTH4;LST1;IRF5;VAMP8;C1QC;C1QB;ARHGAP30;ITGAM;FAM105A;PTPRO;TLR8
DARC	45	CSF2RB;UGCG;NUDCD1;HIF1A;HIPK3;OLFM1;SPNS2;ATP11C;DUSP23;TMEM173;TLL1;CPXM2;SULF2;MKL2;ZNF385D;ETS2;TIAM1;IFI16;PLEKHA7;FAM110D;ADM5;SLCO4A1;ABCD4;TACR1;PLCB4;ITGB4;SNTG2;RAMP3;TSPAN1;SH2B2;IL33;GRAMD1A;GPR68;SBNO2;CNN3;PLSCR1;CFI;C10orf128;GNA14;NNMT;BMPR2;TMTC2;SELP;HAPLN3;TSPAN7
PTPRC	45	CD53;KLRB1;CD1C;DOCK2;MYO1F;AMICA1;ITGA4;CD37;DENND1C;STXBP2;ARHGAP9;SAMSN1;IKZF1;LST1;FYB;ARAP2;SELPLG;MYO1G;ITK;TRAF3IP3;NUP210;CST7;RAC2;CD48;FGD3;PRKCB;CD8A;WAS;C19orf38;CYTIP;DEF6;SELL;AOAH;RNF166;TAGAP;IL2RG;RGS18;GPSM3;ARHGAP30;RUNX3;CD7;PARVG;SNX20;CD3E;CD300E
DCSTAMP	44	CD52;ACP5;ASPHD1;KMO;DOCK3;USP2;MFSD12;CD300LB;FBP1;TREM2;F13A1;DNASE2B;NCEH1;ALCAM;CHIT1;IL12RB2;PPAPDC1A;PLA2G7;TFRC;TNNI2;GLA;SPOCD1;LIPA;TBC1D8;CCDC88A;RPS6KA1;ALOX5;APOBR;CTSD;AQP9;CTSZ;GPC4;CAPG;IL1RN;SDS;CYP27A1;TREML1;PLTP;MYO9B;SLAMF9;NCAPH;IFITM10;MATK;IL24
RAB9B	44	SYNM;ACTG2;CYFIP2;GNAO1;NCS1;ITIH1;BCHE;TEAD3;MYL9;ASB2;FILIP1L;ARHGEF9;TMEM35;RYR2;MPP7;CPNE6;GARNL3;MAPK4;SLC8A1;HSD17B6;LNP1;PDLIM7;HSPB3;PDLIM3;WNK2;PRKACB;PRKAA2;REEP1;TCEAL1;CFL2;DTNA;GATA6;HMCN2;WFDC2;C15orf41;RAB23;FAXC;KCNH2;CCDC81;RBPMS;FAT3;METTL24;CSRP1;PI15
DOCK2	44	TNFSF13;NCF2;NCKAP1L;IL10RA;NCF4;VSIG4;STXBP2;ARHGAP4;PSTPIP1;IKZF1;IQGAP2;CD53;C1orf162;C3AR1;ZC3H12D;CCDC88B;CSF1R;CARD9;ADAP1;PIK3R5;TNFSF8;PRSS36;TRPM2;CFP;PLCB2;TBXAS1;RNASE6;GFRA2;KCNQ1;CYBB;HMHA1;HCK;WAS;SLA;VAMP8;AIF1;ARHGAP30;WDFY4;PTPRC;ITGAM;SLCO2B1;MYO7A;EBI3;BTK
F13A1	43	CLEC10A;BATF;ASPHD1;STAB1;LYVE1;KMO;TMEM176B;ARHGAP18;CD4;MFSD12;LGI2;TNFRSF12A;MARCO;RGL1;ALCAM;ATP13A3;IL12RB2;SELPLG;S100A9;CD200R1;SLC12A9;TRPM2;RNASE1;ALOX5;DCSTAMP;PLB1;HCK;CXCL14;CLEC4G;SPOCD1;CD163;C1QA;CD14;GNA15;PLTP;TBC1D14;SLAMF9;MAF;TGFBI;IFITM10;MYO7A;AIF1;FOLR2
MRC2	43	RECK;CORO2B;NCKAP1L;ANKRD13B;FKBP10;OLFML1;DCN;ECM1;PDGFRL;ITGA11;MXRA8;FBLN2;PAM;SPINT2;CHD3;FNDC5;ASPN;RPS21;FNDC1;LUM;PCOLCE;PI16;PIP4K2C;SPON2;LTBP3;WDR1;TPST1;CAMK2G;FAM180B;FBN1;COL5A1;ABI3BP;COL16A1;SEC11C;SFRP4;PRRG3;CILP;OGN;COL1A2;COL1A1;SH3PXD2B;COL6A3;COL6A6
LRRC8A	43	BCL2L1;PLOD1;DOCK9;ST6GAL1;ADAMTS9;SPARCL1;SPRED2;AKT3;CDYL2;MXD4;THOC1;CAV1;PGF;NCOA3;GAS2L1;SOX13;PEAR1;GNG11;AHDC1;FHL3;SPARC;TMEM204;ARHGDIB;CDH5;N4BP3;PRKCH;PDGFB;LRRC8C;MINA;FAM212A;ARRDC2;SNAI2;PHLDB2;GATA2;KIAA1462;PCDH1;ELK3;FBXO31;ZBTB46;MEF2D;MYO5C;STARD3;CTTNBP2NL
ARHGAP30	43	EFHD2;CD53;NCKAP1L;DOCK2;MYO1F;CCR1;SH3BP1;NLRC4;IKZF1;GPR34;SPI1;PPT1;CSF1R;SELPLG;PTPN6;DOK2;DOK3;CARD9;WDFY4;SNX20;WAS;PLCB2;TLR8;GLIPR1;PRKCB;CYBB;FERMT3;GPR65;HCK;LCP1;SETD5;CYTH4;CPVL;EDA2R;LST1;VAMP8;FAM78A;AIF1;CRYBB1;PTPRC;NRROS;SASH3;GPSM3
CD300LB	42	CD52;ASPHD1;DOCK3;USP2;MMP19;ST14;ZMYND15;SLC29A3;FBP1;TREM2;MSR1;NCEH1;CCSAP;ALCAM;FGR;C12orf5;TFRC;TNNI2;APOBR;SPOCD1;NR1H3;LIPA;CCDC88A;RPS6KA1;CD22;CTSD;CAMK2B;AQP9;CTSZ;DCSTAMP;UCP2;IL1RN;SDS;SDC2;C11orf45;TREML1;SLAMF9;NCAPH;SLC1A4;IFITM10;MATK;IL24
CCDC85A	42	IGIP;AVPR2;SGK223;TSPAN13;CPD;SH3BP4;ERG;IFNGR1;RNF38;ELF1;EED;RASAL2;PHLDB2;ANKRD10;SDPR;ADAMTS9;TMEM204;SF3A1;NRG2;CDH5;NR3C2;LNX1;HOXB7;MFSD6;MTPN;FCHSD2;GIPC2;GATA2;GLTPD1;FRMD3;KCTD12;SCN4B;GPIHBP1;KL;UTRN;PTPRB;CTNNBIP1;KAT6A;GATAD2A;PTPRK;APP;CTTNBP2NL
TIMP3	42	EFHD1;ACVR1C;CEP57;CYP4B1;LGI4;SORBS1;RCSD1;EPS8;ELF1;ARHGAP6;CD248;PARM1;GSN;NCOA3;SLC39A11;GAS2L1;MFGE8;DENND2D;CLEC3B;GRK5;C10orf54;CST3;MBNL2;SAMD10;ANGPT4;ELN;KMT2E;MEF2D;COL5A3;EBF2;HRC;TRNP1;BMP2;MTPN;TACC1;TCN2;L3MBTL1;TMEM43;ANGPTL1;EMP1;CTTNBP2NL;CRIP2
FBLN2	42	PPAP2B;PCED1B;OLFML3;CD34;RASSF4;FABP4;CORO2B;SPSB1;KIAA0922;FBLN5;GSN;DCN;MRC2;SERPINA5;WASF3;CLEC3B;PDE1B;FSTL1;RGS5;PXN;CST3;SCN4B;GDF10;TEX30;ELN;LTBP2;FBN1;ARNT2;PCDHGC3;CLU;MAN1A1;HRC;BSG;OMD;CCDC80;FBXL7;CILP;ITM2A;VIT;EMP1;ABCC1;KIFC3
NCKAP1L	42	CD53;DOCK2;VSIG4;EPM2A;NLRC4;P2RX1;PYCR1;C1orf162;MRC2;SPI1;TYROBP;DOK3;PIK3R5;MAPK4;MNDA;DBNDD2;PLCB2;CAMK2G;TFEC;GLIPR1;HK3;PRKCB;PPP2R2C;CYBB;FERMT3;IFI30;SH3BGRL;LCP1;WFDC2;PLEK;SASH3;LST1;SLC2A9;KCNH2;ZDHHC9;VAMP8;RNF180;ARHGAP30;WDFY4;PRKACB;CSRP1;BTK
ABHD5	41	ANKRD53;EGFLAM;EPHX1;ZDHHC18;EPB41L4B;CRLS1;FABP4;IFNGR2;PTGER3;GNAI1;PLXNB3;GPAM;SERPINA5;FNDC4;PDE1B;PCED1B;MAP3K5;C19orf80;PJA1;PDK4;MAN2A2;RASSF4;MCM6;TNIP1;RHOBTB1;CENPV;TSPAN15;KIFC3;HSDL2;ABCA3;ORMDL3;FAM166B;SDC3;IRS2;NEDD4L;MRPL46;LNPEP;MMD;KIAA1239;ABCC1;BZW2
SPARCL1	41	HSD17B11;MYRIP;SNX9;HSPG2;CPD;DACH1;IGFBP7;ERG;CLEC14A;ATPIF1;A2M;NAGS;S1PR1;TM4SF1;THBS2;RGS5;ARHGDIB;ICAM2;PNMT;TTLL4;MATN3;LRRC8A;TBXAS1;LRRC8C;COL18A1;MYCT1;ELTD1;PAQR4;IGFBP2;GATSL3;TSPAN7;GIMAP4;THOC1;HRC;GPIHBP1;CD93;LRCH1;ESAM;PTPRK;APP;CRIP2
ELF1	41	SOX13;TIMP3;LATS2;LDLRAD4;ARHGAP6;RASAL2;FRY;QKI;SDPR;GAS2L1;WASF3;CTTNBP2NL;SLC38A2;MKL1;RGS5;UTRN;MBNL1;TSC22D3;ATP6V0A1;RRAGD;MAP1B;LRRC8C;SH3RF1;MED30;PHLDB2;MAN1A1;BMP2;MED13L;TACC1;FBXL3;CEPT1;FBXL7;FAM107A;CTGF;PIAS1;PTPRB;ATP1A1;TCF12;BAIAP2;KAT6A;CCDC85A
PTPRB	41	TSPAN18;DOCK9;MYRIP;FXYD5;PODXL;SH3BP4;ERG;CLEC14A;ELF1;RASAL2;PLVAP;SDPR;TPD52;S1PR1;LNX1;KIF17;ARHGDIB;PYCARD;IGIP;TMTC2;PRKCH;LRRC8C;ENG;PKN3;TANC1;NHSL2;HID1;FAM69B;TSPAN7;FRY;GATA2;KCTD12;TACC1;PDE2A;UTRN;ZNF423;CADPS2;BAIAP2;C5orf54;CCDC85A;CRIP2
DDR1	40	EGFLAM;ANO8;CISH;ANTXR2;CDKN1C;EPB41L4B;TSPAN15;SIDT2;GLUL;IFNGR2;PHLDA3;GNAI1;YPEL5;PREX2;SLC39A14;BBS10;ESYT1;MAP3K5;BRPF3;C19orf80;GBE1;RGS3;VPS13D;SLC35C1;KLHL31;ATP10A;NINJ2;WNK1;EDEM2;ARID5B;GRB10;C1QTNF1;C5orf30;TCF7L2;MAOB;STON1;VEGFA;ECHDC3;PPP2R5A;ARHGEF26
SLC9A3R2	40	TSPAN18;PPAP2A;TRAK1;EPHA4;CCDC68;LIMS2;NES;TEK;PREX1;CBFA2T3;PPM1H;HSPA12B;ABCB1;ETS1;KIAA1671;LCN10;JAG2;FGF12;LYST;CLIC5;HEG1;CALCRL;WNK1;ENPP2;BACE2;CRHBP;RAMP2;THBD;ELFN1;ST6GALNAC1;HEY1;PODXL;AIF1L;ABI3;TCF15;HECW2;HYAL2;NTHL1;MYO7B;CRIP2
DPP4	40	RECK;CTTN;ANTXR1;TIMP2;PAMR1;SNX9;ECM1;RAB3IL1;CCDC39;CTSK;AUTS2;FAM180A;FAM180B;THBS2;PCNXL2;NT5E;QPCT;CD70;C11orf53;ANGPTL2;SPON2;TRIO;FAM19A5;FRAS1;MTMR11;SCARA3;PIEZO2;CRYM;TCEAL1;IGFBP7;MCOLN3;GALNT12;IRF4;NTN1;PRRG3;ANK2;SPOCK1;CDS1;MMP2;COL6A6
NCEH1	40	IGSF6;C12orf5;ST14;SLC29A3;CD300LB;TREM2;IL24;CD9;TBC1D8;P2RY1;CCDC88A;PLA2G7;KCNN4;TNNI2;APOBR;LIPA;DNASE2B;ACSS3;NCAPH;CTSD;IFI30;KCNAB2;CTSZ;DCSTAMP;TNFRSF11A;GRN;SLC15A3;LCP1;CAPG;RPS6KA1;SH3BGRL3;PLD3;HEXB;ALCAM;MATK;TREML1;SLAMF9;PPT1;C11orf45;FBP1
TEK	40	EFNB2;KIAA1671;RUNDC3B;PLCG2;ADAM15;SORBS2;PARM1;MYO7B;SLC9A3R2;HSPA12B;TNFRSF8;LSR;XPR1;NR3C2;CD59;HEG1;KCTD12;PKN3;CDH24;RAMP3;CYYR1;SLCO2A1;MOB2;RAMP2;STEAP3;ST6GALNAC1;ADCY4;EPAS1;CCM2L;CADPS2;CD109;PREX1;MCC;TCN2;ARHGAP31;TMTC1;GUCY1B3;ZMIZ1;MLPH;CRIP2
NPNT	40	MYH11;RASSF3;MLLT1;WFDC1;SULF1;EDNRA;P2RX1;C11orf96;ITIH3;ITIH4;CACNA1H;C12orf75;RYR2;TPM2;SGCA;PRKG1;REEP1;DBNDD2;CSDC2;SLC38A1;LTBP1;KCNQ4;RAMP1;LRRC4B;FLNA;SH3BGRL;PLEKHO1;HEY2;LPHN3;CNN1;LMOD1;EDIL3;GATA6;EHBP1L1;SORT1;SPEG;TMEM47;ARHGEF25;MUSTN1;MYOCD
ELK3	40	FXYD5;MFNG;AVPR2;ST6GAL1;EPHA4;SMAD1;SH3BP4;KIF17;RNF38;SH2D3C;THOC1;SOX18;GAS2L1;ECSCR;HSPA12B;LSR;TMEM204;CDH5;PRKCH;LRRC8A;HEG1;PKN3;CARD10;HOXB7;CYYR1;HID1;TSPAN7;GIMAP4;GIPC2;CCM2L;PCDH1;LMO2;CD2AP;ARHGAP31;ESAM;ABI3;C5orf54;PTPRK;APP;EHD4
TCEAL1	40	ITGA8;RASL12;FILIP1L;CYFIP2;PRKAA2;JPH2;TEAD3;MYL9;ASB2;SCARA3;TPM2;FAM46B;ADRA2C;PRKG1;NEXN;SLC8A1;DPP4;PARVG;HSD17B6;PPP1R12A;DBNDD2;PDLIM7;RASL11B;COL4A6;DTNA;SH3BGRL;CALD1;RAB9B;PPP1CB;KCNH2;FEM1B;PRRG3;PALLD;HMG20B;LRCH2;PRKACB;TMEM47;LMOD1;STARD4;HAPLN2
MBNL1	40	FAM198B;MACF1;LRRC16A;ZFHX3;IGFBP7;LDLRAD4;ELF1;ARHGAP6;IKZF1;ARHGAP10;CDC37L1;SLC39A11;GAS2L1;CCDC107;YPEL2;CLEC3B;MKL1;RGS5;JAK2;MBNL2;B3GALT4;MAP1B;PARD3B;SLC38A2;SLC24A3;TNIP1;MMP28;CALD1;MAN1A1;PPP1CB;BMP2;NME3;WASF3;GLYCTK;PDK2;PNMT;ANGPTL1;WIPF1;TMEM43;PIGU
TREM2	39	CD52;ACP5;IGSF6;ST14;MFSD12;CD300LB;LY86;NCEH1;CCDC88A;CHIT1;FGR;PLA2G7;TFRC;TNNI2;RGS1;MSR1;SPOCD1;LIPA;ITGB2;IL1RN;C1orf228;MMP9;CTSD;IFI30;KCNAB2;DCSTAMP;SLC15A3;CAPG;FAIM3;PLD3;SDS;CYP27A1;TREML1;SPP1;SLAMF9;ALCAM;MMP7;MATK;FBP1
MECOM	39	ZBTB18;FAM124B;NUAK1;PPRC1;SMAD1;GIMAP4;ERG;CLEC14A;GIMAP5;S100A16;NEDD9;FZD6;TPD52;MYH9;SCNN1G;KLF6;EDN1;BMX;CDH5;NAGS;LRRC8C;MYCT1;ENPP2;HOXD1;MTUS1;PAK1IP1;ABLIM2;DACH1;USP31;FRY;ABCG1;BACE2;INPP5D;PTPRK;CTGF;FBXO31;MYO5C;DLL4;AGFG2
ASB2	39	ITGA8;SYNM;ACTG2;CKB;RAB33A;DES;NCS1;JPH2;MYOCD;MYL9;CASQ2;TMEM35;CYFIP2;TPM2;CAP2;MAPK4;REEP1;RBM38;HSD17B6;NTF3;HSPB3;PDLIM3;WNK2;KCNQ4;CAMK2G;MCHR1;TMEM252;COL4A6;TCEAL1;FAXC;RAB9B;CNN1;ETV6;CCDC81;KCNH2;RBM24;PRKCB;NXPH3;SLC8A1
KLF9	38	ERRFI1;SESN1;CUTC;NFKBIA;LIFR;SDPR;PELI1;ZBTB16;CEBPD;S1PR1;CSRNP1;IRF2BP2;ITPKC;RGS1;PIK3R1;SLCO4A1;TLDC2;C10orf10;FAM214A;TSC22D3;LRRC1;TP53I3;MTUS1;PER1;ZFP36L2;ARRDC2;RHOB;BMP2;TACC1;USP53;FAM107A;TRAM2;PRDM1;ANGPTL1;SYBU;CMTR2;HOXA9;NAB2
P2RX1	38	NCKAP1L;ACTC1;RASSF3;NCS1;GABRA4;ITIH3;ITIH4;WFDC2;RYR2;MPP7;KCNMA1;ADRA2C;MAPK4;DOCK3;GNAO1;PCDH20;HSD17B6;RIMS3;SLC38A1;HSPB3;LTBP1;CAMK2G;PPP2R2B;WFDC1;PLEKHO1;HEY2;SELM;AKAP6;CCDC81;RNF180;ADARB1;NPNT;BTC;PRKACB;WIPF3;AMIGO2;PDE4D;HTR1B
DOCK3	38	ASPHD1;KMO;GLA;NCS1;P2RX1;MOSPD1;MFSD12;IL24;LTA4H;TBC1D8;CDK18;PGBD5;MICAL1;ALCAM;ATP13A3;MPP7;PLA2G7;TFRC;MAPK4;SPOCD1;HMG20B;RIMS3;DNASE2B;KIAA0430;ETNK1;CTSD;CAMK2B;AQP9;DCSTAMP;DENND1B;AKAP6;CCSAP;TREML1;MYO9B;SLAMF9;IFITM10;MATK;CD300LB
FABP4	38	ETFA;ACADVL;PCED1B;CD34;ZNF697;CAT;FBLN2;KIAA0922;AKAP1;PLXNB3;TMED5;ECH1;PDE1B;CUTC;PALMD;SCN4A;HEBP2;CIDEA;SPOCD1;KCNIP2;GEM;EPB41L1;G0S2;LIPE;B3GNT5;MAN2A2;VILL;FAM69B;CD36;SERPINF2;KIFC3;HSDL2;ABHD5;PLA2G16;PLEKHG6;GJA5;CA4;PDK4
LIPA	38	ACP5;ASPHD1;C9orf16;USP2;LAPTM5;ST14;MFSD12;CD300LB;TREM2;OPN3;MSR1;TBC1D8;NCEH1;ALCAM;CHIT1;FAIM3;PLA2G7;IL24;TRPV2;DNASE2B;ITGB2;CCDC88A;TM6SF1;CTSD;AQP9;DCSTAMP;GPC4;GRN;SLC15A3;RPS6KA1;PLD3;CYP27A1;TREML1;SLAMF9;NCAPH;NR1H3;MATK;FBP1
WAS	38	TLR8;BATF;CD53;DOCK2;CD4;STXBP2;ARHGAP9;ARHGAP4;SAMSN1;FYB;SMAP2;NCF4;SELPLG;SLA;DOK3;CARD9;THEMIS2;HCLS1;TBXAS1;ALOX5;KCNQ1;ASGR2;CYBA;PLB1;EVI2A;HCK;C19orf38;VAMP8;CD163;AIF1;ARHGAP30;GNA15;PTPRC;SLCO2B1;SNX20;MYO7A;GPSM3;CD300E
THOC1	38	MDN1;RBM5;MYRIP;PNISR;ZNF692;SPARCL1;GIMAP4;ERG;CLEC14A;PPWD1;ADPRH;ZNF629;NAA25;ARHGDIB;CDH5;VPS13C;TTLL4;SLC44A2;LRRC8A;ELTD1;NHSL2;ATRN;MTPN;HOXB7;MON2;CLK1;GLMN;GIPC2;SCML1;RPS6KA2;ERLIN1;GPIHBP1;ROBO4;KL;TRAM1;ELK3;UTRN;FAM117A
PMP2	37	B4GALNT4;CYB5R2;SORCS1;MLIP;SLC2A1;GAL3ST1;PLP1;NCAM1;BCAS1;TNNT2;GAS2L3;DRP2;ARHGAP19;PLEKHB1;RBM11;PRIMA1;FOXD3;CADM4;NKAIN4;MBP;DHH;TMPRSS5;COL9A3;PAQR6;SFRP5;GRIK3;NRXN3;FA2H;AK5;ANGPTL7;GFRA3;AATK;FAM101A;CMTM5;MPZ;NRXN1;TNNC1
C1QC	37	TNFSF13;VSIG4;CD4;CCR1;ALOX5AP;GPR34;SPI1;TYROBP;CSF1R;CMKLR1;DOK2;AIF1;AP1B1;RNASE1;TBXAS1;MFSD1;SLCO2B1;KCNQ1;CRYBB1;NAGA;HCK;PTPN6;C3AR1;CD163;C1QB;C1QA;SIGLEC1;CD14;CYBA;PLTP;ITGAM;FAM105A;GFRA2;TLR8;MYO7A;FUCA1;FOLR2
TSC22D3	37	ERRFI1;SOX13;SESN1;CUTC;NFKBIA;TXNIP;FOXO1;ELF1;SLC38A2;SERPINE1;NCOA3;SMAP2;ZBTB16;KLF15;YPEL2;SH3RF1;IRF2BP2;KLF6;ITPKC;KLF2;PIK3R1;KLF9;PACSIN2;DDIT4;LONRF1;NEDD9;FAM214A;TLDC2;ZFP36L2;PER1;SMARCD2;ARRDC2;DENND3;RHOB;FRY;SH3TC1;SYBU
ITIH3	37	ARHGEF10L;ACTC1;CD34;GRIK5;GATA6;P2RX1;ITIH4;CDK18;WFDC2;C12orf75;CASQ2;RYR2;MPP7;ITIH1;NTRK3;MAPK4;SLC26A10;DGKG;RIMS3;LTBP1;KCNQ4;CAMK2G;PPP2R2B;WFDC1;PLEKHO1;HEY2;PRDM16;SELM;AKAP6;AMIGO2;CNN1;MUSTN1;RBPMS;NPNT;SPEG;MYOZ1;HTR1B
MATK	37	CD52;ASPHD1;DOCK3;IGSF6;MFSD12;SLC29A3;CD300LB;TREM2;IL1RN;DNASE2B;NCEH1;CCSAP;ALCAM;PLA2G7;KCNN4;TNNI2;APOBR;SPOCD1;LIPA;RAC2;FAIM3;C1orf228;NCAPH;CAMK2B;KCNAB2;DCSTAMP;GPC4;RPS6KA1;TCIRG1;TREML1;SPP1;SLAMF9;MMP9;SLC1A4;MMP7;IFITM10;FBP1
LCP1	37	CD53;NCKAP1L;FKBP10;IGSF6;LAPTM5;ST14;HCST;PIK3AP1;LY86;NCEH1;SPI1;TYROBP;PPT1;GLIPR1;PTPN6;APOBR;MNDA;LYN;MSR1;ITGB2;RAC2;FAIM3;PRKCB;IFI30;KCNAB2;FERMT3;TNFRSF11A;GMIP;SLC15A3;P2RY1;SASH3;RPS6KA1;ARHGAP30;WDFY4;COL1A2;NRROS;PTPRO
ERG	37	MYRIP;SPARCL1;RELL1;SH3BP4;GIMAP4;MFAP3;CMIP;MCTP1;THOC1;GPR146;HSPH1;FZD6;MECOM;TMEM255B;MKL2;TIAM1;ELTD1;CDH5;PTPRB;PDGFB;PDIA5;HOXB7;SMAD1;TSPAN7;GLMN;GIMAP6;CYYR1;ZNF629;ZNF521;APP;ROBO4;UTRN;FBXO31;ZNF792;CRIM1;PTPRK;CCDC85A
SASH3	37	CD53;NCKAP1L;MYO1F;P4HA2;STXBP2;SH3BP1;NLRC4;IKZF1;PIK3AP1;FYB;ARHGAP30;SPI1;TYROBP;PIK3R5;DOK3;CARD9;MNDA;PYCARD;MYD88;PLCB2;ITGB2;RAC2;PRKCB;IFI30;FERMT3;CYBA;LCP1;SLA;RPS6KA1;LST1;VAMP8;FAM78A;RGS19;C1orf162;WDFY4;GPSM3;CCR5
NPDC1	37	TMEM88;ARHGEF3;OLFM1;SPNS2;ADAM15;ARHGAP4;TPST2;ITGB4;CPXM2;SULF2;MKL2;ST6GALNAC1;JAG2;FAM110D;PLCB4;HEG1;TPO;CDH24;RAMP3;CYYR1;LCN10;TSPAN1;TSPAN7;THBD;ANKRD29;ADCY4;EPAS1;LIFR;ISOC1;CFI;CCM2L;TFPI2;C10orf128;FAM107A;BMPR2;SELP;CRIP2
GIPC2	37	RBM5;PTK2;NR3C2;SH3BP4;GIMAP4;CHN1;CLEC14A;SLC25A30;GART;YJEFN3;ELK3;ARHGEF3;MKL2;LSR;PYCARD;FRMD3;TGFBR2;PRKCH;RUFY3;HOXB7;CYYR1;FAM69B;TRMT13;TSPAN7;DACH1;THOC1;ANKRD29;FAM171A1;CCDC178;KCTD12;NCK2;CCM2L;ARHGAP31;TTLL4;NTHL1;PTPRK;CCDC85A
FOLR2	36	TNFSF13;CLEC10A;STAB1;IL10RA;LYVE1;NCF4;VSIG4;CD4;F13A1;GPR34;COLEC12;MARCO;CSF1R;SELPLG;PRSS36;AIF1;HCLS1;CD200R1;FCGRT;RNASE1;KCNQ1;NAGA;PTPN18;MPPED2;C1QC;C1QB;C1QA;FUCA1;CD14;PLTP;ITGAM;SLCO2B1;TGFBI;MYO7A;SIGLEC1;CFP
GFPT2	36	LGR4;PCOLCE2;DCLK1;PDGFRL;ABL1;PAM;HTRA3;ADAMTSL4;SCARA5;WNT10B;TPPP3;PXN;MEDAG;PI16;HAS1;PROCR;WNT9A;TPST1;UAP1;FBN1;IGFBP6;C11orf89;TRIP10;ABI3BP;EPS8L2;SMAD3;SEMA3C;GALNT12;BMP1;WNT2;ISLR;ACKR3;GPR133;RADIL;PRRX2;ASAP3
HCK	36	TNFSF13;BATF;DOCK2;MYO1F;CCR1;STXBP2;ARHGAP9;LGI2;F13A1;PIK3AP1;FYB;SPI1;SELPLG;CYTH4;DOK3;S100A9;TRPM2;GCA;CYBB;WAS;SLA;LST1;RBM47;FAM20A;CD163;C1QC;C1QB;C1QA;EBI3;ARHGAP30;CD14;GNA15;SLCO2B1;TLR8;AIF1;TBC1D14
SDS	36	CD72;KMO;PLAUR;MMP19;LAPTM5;ST14;ZMYND15;CD300LB;TREM2;CD9;CHML;KYNU;CHIT1;IL12RB2;FBP1;FGR;PLA2G7;TFRC;RGS1;MYO9B;PPAPDC1A;MFSD12;PGBD5;AQP9;DCSTAMP;DMXL2;PLD3;SDC2;AGPAT4;VMO1;GNA13;SLAMF9;AVPI1;MMP7;IFITM10;IL24
CD53	36	NCKAP1L;DOCK2;LAPTM5;STXBP2;ARHGAP9;SAMSN1;CD86;IKZF1;PIK3AP1;C1orf162;SPI1;TYROBP;SNX20;TLR8;PTPN6;ADAP1;PIK3R5;CUL7;PARVG;ITGB2;TBXAS1;MFSD1;PRKCB;FERMT3;HMHA1;LCP1;WAS;SLA;CPVL;VAMP8;C1QB;ARHGAP30;PTPRC;C3AR1;SASH3;GPSM3
AIF1	36	CLEC10A;STAB1;NCF4;DOCK2;VSIG4;CD4;LGI2;ARHGAP4;F13A1;ARHGAP30;DOK3;S100A9;HCLS1;AP1B1;HK3;ALOX5;KCNQ1;CYBB;CRYBB1;PLB1;HCK;WAS;PTPN18;LST1;VAMP8;C1QC;C1QB;C1QA;C1orf162;CD14;GNA15;PLTP;TLR8;MYO7A;EBI3;FOLR2
NEDD9	36	MYH9;UNC119B;CDKN1B;SPRY2;FOXO1;ANKRD37;CLEC14A;DDIT4;SERPINE1;DGCR8;SDPR;SIK1;MECOM;S1PR1;ZBTB18;KLF6;PELO;DAPK3;MED30;MAML2;CYR61;LRRC8C;SH3RF1;CDC42EP3;MYCT1;TSC22D3;SLC45A1;CLCF1;MTFP1;DLL4;ARRDC2;DACH1;ITPRIP;LATS2;CTGF;CTTNBP2NL
SLAMF9	36	CD52;ASPHD1;CD72;KMO;DOCK3;USP2;ST14;MFSD12;CD300LB;TREM2;F13A1;TBC1D8;NCEH1;TFRC;ALCAM;IL12RB2;PLA2G7;TREML1;TNNI2;SPOCD1;HMG20B;LIPA;DNASE2B;RPS6KA1;COL9A2;AQP9;DCSTAMP;IL1RN;PLD3;SDS;CYP27A1;AGPAT4;GNA13;IFITM10;MATK;FBP1
LRRC8C	36	BCL2L1;TCF4;NUAK1;SPARCL1;LATS2;FOXO1;KIF17;CLEC14A;SLC25A30;ATP9A;GIMAP5;ELF1;MID2;NEDD9;MECOM;MYH9;MAGI1;CDH5;LRCH1;PRKCH;LRRC8A;LNX1;MYCT1;ELTD1;HOXD1;DACH1;USP31;FRY;GLTPD1;CEPT1;CD2AP;TPD52;CTGF;PTPRB;ESAM;CTTNBP2NL
CTSD	36	ASPHD1;KMO;DOCK3;IGSF6;CD36;ST14;IL24;TREM2;NCEH1;ASAH1;NPC2;ALCAM;CCSAP;FSTL1;PLA2G7;TNNI2;SPOCD1;USP2;LIPA;TM6SF1;TMED5;CDK18;AQP9;DCSTAMP;GPC4;SLC15A3;P2RY1;CALM3;FAIM3;PLD3;HEXB;CYP27A1;TREML1;SORT1;IFITM10;CD300LB
SPOCD1	36	ACADVL;DOCK3;OLFML3;MMP19;CD36;MAP2K3;FABP4;ASPHD1;CD300LB;TREM2;F13A1;TNFRSF12A;TBC1D8;TMED5;CCDC88A;ATP13A3;IL12RB2;MICAL1;MFSD12;CSN1S1;CTSD;CHML;SORT1;DCSTAMP;GPC4;CXCL14;SDC2;TREML1;MYO9B;SLAMF9;ALCAM;C1S;IFITM10;MATK;TBC1D14;FABP3
COL1A2	35	FKBP10;OLFML3;ECM1;COL3A1;PYCR1;CACNB4;LUM;ITGBL1;SPINT2;MRC2;ASPN;FSTL1;MAPK4;PCOLCE;THY1;LOX;TRIO;ALPK2;TPST1;FBN1;COL5A2;APPL2;COL5A1;LCP1;SFRP2;SFRP4;C1QTNF3;LRRC15;CREB3L1;COL1A1;SH3PXD2B;COL6A3;COL6A2;CTHRC1;CKAP4
ZAP70	35	KLRB1;ANO9;SH2D1A;ITGA4;CD6;CD7;CD2;TBC1D10C;IKZF1;PTPRCAP;DEF6;TRAT1;CERKL;GRAP2;SAMD3;TRAF3IP3;LIMD2;SKAP1;TMC8;ACAP1;LTB;SIT1;DENND1C;ITK;IL2RB;RASGRP1;GZMA;GZMM;C11orf21;RLTPR;CD3E;RUNX3;SPOCK2;CD3D;LCK
C19orf80	35	SAT1;AOC2;APBB1IP;ANKRD53;CLMN;OLFM2;CTIF;GPAM;GAS2L2;DGAT1;PDE1B;DGAT2;TESK1;SREBF1;GBE1;DUSP4;ABCD2;THRSP;ABCA3;KLHL31;MCM6;DLAT;FRMD1;ATP2B4;ABHD5;CYP4F22;TNIP1;SGK2;PRRT4;FAM166B;DDR1;ELOVL5;PDK4;ACLY;ARHGEF40
ESRP1	35	FXYD3;CCDC64B;FBXO2;PKP3;CLCA2;S100A14;SPINT1;RAP1GAP;TFAP2A;TFAP2C;GJB2;GJB6;PLCH2;ESRP2;LAD1;PVRL4;SCNN1A;TACSTD2;CLDN1;COL17A1;TRIM29;KRT23;RHOV;DSP;FAM84A;KLK1;EPCAM;SERPINB5;LYPD3;RAB25;RHCG;SCGB2A2;CALML5;GRB7;ZNF750
PALLD	35	FILIP1L;CYFIP2;MYL9;PRKAA2;TENM3;C9orf3;FAM46B;SEMA4F;CAP2;CCDC107;GLI3;FILIP1;TPM2;DNAJB5;DNAJB4;FHL3;TGFB1I1;HPD;PACSIN2;MRVI1;C20orf24;VCL;TCEAL1;MYOCD;ITPR1;CALD1;CSGALNACT1;JPH2;RAB23;EDIL3;NPY1R;ARHGAP10;TMEM47;HAPLN2;CDYL2
CYBB	35	CLEC10A;NCKAP1L;STAB1;LYVE1;DOCK2;VSIG4;SLC9A9;CCR1;ALOX5AP;LGI2;GPR34;CD72;RGL1;SELPLG;PIK3CG;DOK2;PRSS36;CD200R1;CFP;CTSO;HK3;CRYBB1;HCK;PLEK;LST1;AIF1;ARHGAP30;CD14;ITGAM;FAM105A;GFRA2;CMKLR1;SIGLEC1;GAS7;LPAR5
IFI30	35	CD52;ACP5;NCKAP1L;FKBP10;IGSF6;LAPTM5;ST14;STXBP2;FBP1;TREM2;PIK3AP1;MSR1;NCEH1;SPI1;TYROBP;ALCAM;FGR;NPC2;GUCY1A3;APOBR;MNDA;LY86;ITGB2;RPS6KA1;COL1A1;KCNAB2;FERMT3;KYNU;SLC15A3;LCP1;SASH3;NPL;CCR1;VAMP8;CCDC88A
S1PR1	35	EFNB2;TSPAN13;SPARCL1;SPRY1;CLEC14A;SRGN;EDNRB;TMCC3;KIAA1211L;NEDD9;SDPR;ITPRIP;SOX17;ICAM2;SLCO4A1;CLDN5;KLF9;ATP1A1;CDC42EP3;LRRC1;MTUS1;TSPAN6;ARRDC2;FRY;APOLD1;PLEKHG1;HYAL2;CD93;FAM107A;CMTM8;PTPRB;TMTC1;KAT6A;CTTNBP2NL;CRIP2
ASPHD1	35	STAB1;KMO;DOCK3;MOSPD1;MFSD12;SLC29A3;CD300LB;F13A1;DNASE2B;CHML;PGBD5;CCSAP;ALCAM;PPAPDC1A;TNNI2;PVRL4;SPOCD1;NR1H3;LIPA;CTSD;CAMK2B;AQP9;DCSTAMP;GPC4;CAPG;SEZ6L2;SDC2;ST14;CYP27A1;TREML1;SLAMF9;NCAPH;SLC1A4;IFITM10;MATK
WFDC2	35	NCKAP1L;RASL12;CYFIP2;GNAO1;DES;MSRB1;NCS1;SHROOM3;P2RX1;TRPC4;ITIH1;ITIH3;MYL9;NCALD;RYR2;SGCA;ADRA2C;SORBS1;MAPK4;REEP1;HSD17B6;EPM2A;HSPB3;PDLIM3;WNK2;PPP2R2C;GATA6;HMCN2;RAB9B;FAXC;TMEM61;KCNH2;GRIK5;FAT3;HAPLN2
IKZF1	35	BATF;KLRB1;CD1C;CD53;DOCK2;SKAP1;TMC8;HMHA1;STXBP2;PIK3AP1;FYB;DEF6;CCDC88B;CERKL;CARD9;ZAP70;TRAF3IP3;MBNL1;NUP210;RAC2;CD48;FGD3;ITGA4;PRKCB;CD69;DENND1C;PTPN7;SASH3;FAM78A;GPSM3;ARHGAP30;RUNX3;PTPRC;SNX20;CD3E
IFI16	35	CSF2RB;EFNB1;LCAT;DARC;MAFK;ATP11C;MARCH3;SNED1;MID2;TMEM173;RALGDS;RAB3IL1;EXT1;CDKN3;DACT1;RUNX1;SP110;TEAD4;B4GALT5;SLC46A3;PARP9;IL4R;WDR1;CCDC71L;PLAU;RHOJ;SH2B2;GPR68;SBNO2;LMNB1;CREB3L2;SECTM1;PDE2A;CDC7;NNMT
MYL9	35	AUTS2;CYFIP2;NDUFB7;GNAO1;ILK;RNF180;JPH2;PDLIM7;ZYX;ASB2;ARHGEF9;TPM2;FGR;PRKG1;REEP1;HPD;PPP1R14A;LPHN3;NTF3;WDR1;TCEAL1;CFL2;SH3BGRL;WFDC2;TAGLN;MYL6;RAB9B;RBPMS;PALLD;PRKACB;CSRP1;FLNA;TMEM47;LMOD1;HAPLN2
C1QA	34	TNFSF13;IL10RA;NCF4;VSIG4;CD4;ALOX5AP;ARHGAP4;F13A1;TCN2;RNASET2;GPR34;AIF1;CSF1R;SELPLG;FCGRT;RNASE1;TBXAS1;RNASE6;NINJ1;KCNQ1;CYBA;HCK;CPVL;PARP16;CD163;C1QC;C1QB;EBI3;CD14;GNA15;PLTP;SLCO2B1;FUCA1;FOLR2
CCDC64B	34	KRT77;FXYD3;AP1M2;S100P;PKP3;CLCA2;S100A14;SPINT1;LYPD3;TFAP2A;TFAP2C;GJB2;GJB6;PLCH2;ESRP2;ESRP1;LAD1;PVRL4;HSD11B2;AQP5;KRT23;RHOV;DSP;KLK1;EPCAM;COL17A1;RAB25;RHCG;SCGB2A2;MUCL1;CALML5;SFN;GRB7;ZNF750
LMOD1	34	MYH11;EFHD1;RRAD;RCAN2;MYOCD;PARM1;MYL9;LPHN3;TPM2;FAM46B;NR2F2;ST5;PRKG1;CSGALNACT1;PARVG;DBNDD2;CACNA1H;MRVI1;KCNQ4;KCNAB1;MRGPRF;TCEAL1;DTNA;SH3BGRL;ITPR1;CALD1;TAGLN;TRNP1;ENDOD1;MUSTN1;NPNT;SYNPO2;CSRP1;ARHGEF25
MYOCD	34	ITGA8;MYH11;TMOD1;SYTL2;MPP7;PRKAA2;JPH2;ASB2;CASQ2;RYR2;PDE3A;RBM24;CAP2;GUCY1A3;PRKG1;PPP1R12A;SLC8A1;PCDH20;DGKG;LPHN3;NTF3;SLC38A1;PDLIM3;KCNAB1;RAMP1;GATA6;CSGALNACT1;AKAP6;RGS7BP;CNN1;RBPMS;NPNT;PALLD;LMOD1
TBXAS1	34	TNFSF13;CD53;CTTN;IL10RA;NCF2;DOCK2;SPARCL1;CD4;LAPTM5;SRGN;TYROBP;CSF1R;SELPLG;CD86;HCLS1;PYCARD;AP1B1;ITGB2;RNASE6;MFSD1;KCNQ1;CYBA;IGSF21;EVI2A;WAS;C3AR1;CD163;C1QC;C1QA;ITGAM;FAM105A;GFRA2;TLR8;GPSM3
ITGAM	34	NCF2;IL10RA;LYVE1;DOCK2;VSIG4;MAMDC2;ADAM12;ALOX5AP;PSTPIP1;GPR34;SPI1;CPXM1;CSF1R;HPGDS;DOK2;PRSS36;HK3;PLCB2;LTBP4;TBXAS1;FOLR2;CYBB;ADCY7;PTPN6;PTPN18;IRF5;C3AR1;C1QC;BTK;FAM105A;GFRA2;MYO7A;CFP;LPAR5
ANPEP	34	STIM1;MFGE8;CUTC;OLFML3;CD34;ECM1;CNTN3;ARHGAP6;FSTL1;CD248;CAV1;NCOA3;TRERF1;ADAMTS2;SOX13;MAP3K5;SLIT3;NMNAT3;DNMBP;MAP1B;COL5A2;COL5A3;COL5A1;HERC5;SMARCD2;S100A4;SNAI2;CORO2B;ZEB1;CD109;PFKFB2;COL6A1;COL6A3;COL6A2
SNX20	34	CD53;CTTN;CD1C;MYO1G;AMICA1;SKAP1;DENND1C;CCR2;SAMSN1;IKZF1;PIK3AP1;DEF6;SELPLG;RELT;ADAP1;PTPRC;LIMD2;CD48;FGD3;GAPT;HMHA1;WAS;CYTIP;AOAH;RNF166;LST1;IL2RG;FAM78A;RGS18;ARHGAP30;GNA15;FAM26F;TLR8;GPSM3
PLA2G16	33	TUSC5;PCK1;TM7SF2;DCXR;EPB41L4B;G0S2;ZMAT1;FABP4;GPD1;MESP1;TMEM132C;PLIN1;PPP1R1A;PPP1R1B;PEX19;PNPLA2;HEBP2;GYG2;KCNIP2;APMAP;LIPE;RAC3;FAM47E-STBD1;HRASLS5;CIDEA;HADH;GPT2;ALDH1L1;ALDH2;PTPRF;GPX4;CRLS1;COX14
FOXD3	33	B4GALNT4;PMP2;B4GALNT1;SORCS1;SOX8;SLC2A1;GAL3ST1;PLP1;BCAS1;TNNT2;GAS2L3;SOX10;PLEKHB1;PRIMA1;RELN;DHH;ITGB8;COL9A3;PRDM16;SFRP5;GRIK3;NRXN3;FA2H;NRXN1;DRP2;DEPDC7;GFRA3;AATK;FAM101A;CMTM5;MPZ;MAL;ARHGAP19
CSF1R	33	TNFSF13;CLEC10A;IL10RA;LYVE1;NCF4;DOCK2;CD4;LGI2;GPR34;P2RY14;SELPLG;P2RY13;DOK2;PRSS36;RNASE1;TBXAS1;RNASE6;MAF;KCNQ1;CYTH4;IRF5;C3AR1;GFRA2;C1QC;C1QA;ARHGAP30;TSPAN33;CD14;COLEC12;ITGAM;SLCO2B1;MYO7A;FOLR2
PDLIM7	33	ACTG2;CYFIP2;GNAO1;MSRB1;ILK;ZYX;MYL9;ARHGEF9;TPM2;DNAJB5;YWHAH;PPP1R12A;TGFB1I1;DBNDD2;WDR1;VCL;TSPAN2;TCEAL1;RAB9B;CFL2;VASP;MCU;RAB23;CNN1;PIP5K1C;CCDC81;SMTN;PRUNE2;EDIL3;CSRP1;FLNA;TMEM47;STK38L
PLA2G7	33	CD52;ACP5;KMO;DOCK3;IGSF6;MAPK13;MMP19;ST14;ZMYND15;FBP1;TREM2;OPN3;TBC1D8;NCEH1;DHRS9;ALCAM;CHIT1;FGR;LIPA;DNASE2B;IL1RN;CTSD;AQP9;DCSTAMP;GPC4;FAIM3;SDS;CYP27A1;MFSD12;SLAMF9;SLC1A4;MATK;IL24
CD163	33	STAB1;VSIG4;ALOX5AP;ARHGAP4;F13A1;GPR34;CRABP2;SELPLG;S100A9;HCLS1;PLTP;TRPM2;RNASE1;MRVI1;TBXAS1;FGD3;RNASE6;ALOX5;ASGR2;MERTK;PLB1;HCK;WAS;SLA;C3AR1;C1QC;C1QB;C1QA;CD14;SCN1B;SLCO2B1;MYO7A;EBI3
ST14	33	CD52;ASPHD1;FKBP10;SDS;CD36;LAPTM5;CD300LB;TREM2;LY86;NCEH1;SPINT1;CCDC88A;PLA2G7;PVRL4;MSR1;LIPA;IL1RN;CD22;COL9A2;IFI30;KCNAB2;CTSD;CTSZ;LCP1;AQP9;TM6SF1;PLD3;RPS6KA1;TREML1;SLAMF9;ALCAM;IFITM10;FBP1
ACVR1C	33	FAM198B;TIMP3;TM7SF2;GLIS1;EPB41L4B;CORO1C;TMEM132C;PPP1R1A;DRAM2;GAS2L1;PPP1R1B;CCDC107;PTPRF;PDE3B;SLC27A2;C6;APMAP;C20orf27;C20orf24;ACSS3;LPL;PTPN3;NAT8L;ORMDL3;HADH;DENND2D;GPT2;DNAH9;CEPT1;IRS2;EGFL6;TTC36;CRLS1
SDPR	33	SGK223;CDKN1B;SPRED2;SPRY2;LDLRAD4;CCR7;ELF1;RASAL2;NEDD9;RGAG4;ITPRIP;ZBTB16;S1PR1;H1FX;TMCC3;AP1B1;CLDN5;SRGN;ATOH8;LNX1;USP13;TSPAN6;ABHD6;LRCH1;BMP2;KLF9;TACC1;PDE2A;FBXO31;MYO5C;BAIAP2;PTPRB;CCDC85A
PRKCH	33	TSPAN18;DOCK9;EMCN;ST6GAL1;CD34;KIF26A;ITGA6;PODXL;LATS2;EHD4;CLEC14A;AFAP1;FRY;NEURL1B;PRKAR1B;CPNE2;PEAR1;FAM129B;LRCH1;SLC44A2;LRRC8A;LRRC8C;TSPAN7;ARRDC2;GIPC2;PLEKHG1;HYAL2;CD93;ELK3;PTPRB;ESAM;MYO5C;CTTNBP2NL
MAN1A1	33	FAM198B;RASSF4;HIPK3;ELF1;FBLN2;ARHGAP6;MCTP1;GSN;RAB8B;MAML2;WASF3;SELENBP1;MKL1;NTRK2;RGS5;HRC;ECM2;MBNL1;ANGPT1;SLC38A2;CYP4B1;LGALS3BP;CHST7;PCDH9;RANBP3L;ALDH4A1;OMD;PTPN13;CFD;MASP1;CLEC3B;PNMT;PARD3B
NCS1	33	DOCK3;RASSF3;GRIK5;JPH2;FABP3;P2RX1;ITGB1BP2;ASB2;WFDC2;PELI3;CASQ2;MPP7;KCNMA1;SGCA;MAPK4;REEP1;HSD17B6;RIMS3;EPM2A;SLC38A1;WNK2;RAMP1;HOXC11;NXPH3;POLR2A;PLEKHO1;AKAP6;RAB9B;FAXC;KCNH2;RNF180;WIPF3;FLNA
HSPB3	33	MYH10;LGR6;DIRAS1;AFAP1L2;CKB;ACTC1;RASSF3;DES;PRKAA2;SHROOM3;TRPC4;P2RX1;TRIM54;TMEM158;ASB2;CYFIP2;CPNE6;REEP1;SYNDIG1;HSD17B6;RASL11B;ZBTB7C;PPP2R2C;WFDC2;RAB9B;FAXC;TMEM61;KCNH2;CCDC81;PCDH7;FAT3;METTL24;WIPF3
PACSIN2	33	GPRIN3;RRAD;REM1;RCAN2;SLC7A2;MKL1;LGI4;RCSD1;ARHGAP6;RASAL2;NCOA3;SOX13;INPP4B;DENND3;RGS5;ARHGDIB;NEXN;FHL5;COL18A1;CLMN;TSC22D3;COX4I2;MMP28;MERTK;CYP4X1;FAM162B;TACC1;EZR;SNCG;PALLD;ARHGAP10;LDLRAD4;CRIP2
JPH2	33	SYNM;RASL12;RASSF3;FAM46B;NCS1;MYOCD;MYL9;ASB2;CCDC107;RYR2;TPM2;CAP2;ADRA2C;PYGB;MAPK4;REEP1;DGKG;HSD17B6;CACNA1H;EPM2A;NTF3;WNK2;CAMK2G;RAMP1;TCEAL1;DTNA;WFDC1;ITPR1;HPD;CNN1;PALLD;WIPF3;FLNA
SLCO4A1	33	AMOTL1;EPHX1;CUTC;NFKBIA;GAB2;OLFM1;DARC;DUSP23;DENND3;SERTAD4;ZNF740;MLLT4;S1PR1;MAP3K6;ZNF385D;ETS2;ITPKC;KLF9;C10orf10;FAM107A;CSK;SH3RF1;BIRC3;EXTL3;ARRDC2;EGLN3;SBNO2;LRRC32;TENC1;PRR5L;ARHGAP10;STC1;SH3TC1
RASSF4	33	SAT1;C1orf122;GIGYF1;AOX1;NFKBIA;CYP4B1;TENM1;FBLN2;ARHGAP6;SLC39A11;SERPINA5;WASF3;RGS5;MKLN1;VIPR1;CST3;FLYWCH2;GDF10;HSPB7;PARD3B;TP53I3;TEX261;IGFBP7;CENPV;KCNB1;MAN1A1;ABHD5;OMD;FAM166B;FBXL7;ITM2A;MGP;VIT
CYBA	33	CTTN;C1QC;CST3;ARHGAP4;LDLRAD4;HCST;SRGN;PARM1;SPI1;TYROBP;INPP4B;CD86;CARD9;PYCARD;ITGB2;TBXAS1;KCNQ1;NAGA;SH3BGRL;WAS;SASH3;KCTD12;VAMP8;MAZ;TRAPPC5;C1QB;C1QA;C1orf162;ANGPTL1;TLR8;C4orf48;HES4;CCDC85B
UTRN	33	MYRIP;SH3BP4;ERG;ELF1;THOC1;MAOB;ZBTB38;SF3A1;PTPRB;ZMYM2;ARHGEF12;HEG1;HOXB7;MTPN;GOLIM4;POLR2A;GLMN;PHLDB2;SCML1;RGS5;SMCR8;FHOD3;ERLIN1;APP;NTN4;NOTCH3;ARHGAP31;CCDC85A;CRLS1;CLK1;KAT6A;GATAD2A;CTTNBP2NL
RASSF3	33	AUTS2;PNMA1;NCS1;SHROOM3;P2RX1;FAM13B;PCDH7;RASL11B;TPM2;GNG12;INHBA;PRKG1;HSD17B6;SLC38A1;HSPB3;CAMK2G;TSPAN2;POLR2A;SH3BGRL;PLEKHO1;SETD5;JPH2;LRRC4B;CCDC81;CBL;RGS19;NPNT;HMG20B;BTC;PRKACB;WIPF3;FLNA;AMIGO2
GJB6	32	KRT77;VSNL1;S100P;CCDC64B;C2orf82;CLCA2;S100A14;FXYD3;SPINT1;LYPD3;TFAP2A;TFAP2C;GJB2;ESRP1;LAD1;PVRL4;PIP;S100A2;AQP5;KIAA1324;KRT23;RHOV;DSP;EPCAM;SERPINB5;COL17A1;RAB25;RHCG;SCGB2A2;CALML5;SFN;ZNF750
CSRP1	32	NCKAP1L;ACTG2;CYFIP2;MSRB1;ILK;MYL6;NTF3;C9orf3;SNED1;MYL9;LBR;ARHGEF9;SYTL2;TPM2;PRKG1;PPP1R12A;TGFB1I1;DBNDD2;PDLIM7;SRF;WDR1;PDLIM3;VCL;TSPAN2;IQCJ-SCHIP1;TAGLN;RAB9B;CNN1;CCDC81;RBPMS;FLNA;LMOD1
RHOV	32	KRT77;FXYD3;CCDC64B;S100A14;SPINT1;LYPD3;TFAP2A;TFAP2C;GJB2;GJB6;PLCH2;ESRP2;ESRP1;LAD1;PVRL4;TACSTD2;HSD11B2;AQP5;KRT23;DSP;FAM84A;EPCAM;SERPINB5;COL17A1;RAB25;RHCG;SCGB2A2;MUCL1;CALML5;SFN;GRB7;ZNF750
SFRP5	32	SCN7A;LCNL1;SORCS1;MLIP;PMP2;L1CAM;GAL3ST1;PLP1;KIF19;BCAS1;GAS2L3;SOX10;MT3;FOXD3;CLDN1;NKAIN4;DHH;TMPRSS5;COL9A3;EMILIN3;BRSK2;GRIK3;NRXN3;FA2H;SLC2A1;ANGPTL7;DRP2;AATK;FAM101A;MPZ;MAL;CMTM5
FBP1	32	CD52;ACP5;GLA;IGSF6;LAPTM5;ST14;CD300LB;TREM2;MSR1;DNASE2B;NCEH1;CCDC88A;CHIT1;FGR;PLA2G7;TFRC;APOBR;LIPA;TFEC;RPS6KA1;MMP9;IFI30;AQP9;DCSTAMP;IL1RN;SDS;PLD3;CYP27A1;SLAMF9;NCAPH;MMP7;MATK
LAPTM5	32	CD53;CD37;GRN;ST14;FBP1;HCST;SRGN;LY86;KYNU;TYROBP;PPT1;MPP1;GPR183;FGR;CD86;PIK3R5;APOBR;MSR1;LIPA;ITGB2;TBXAS1;TFEC;MFSD1;IFI30;KCNAB2;SH3BGRL;LCP1;PLD3;SDS;PTPRE;GNA13;CCDC88A
PIK3R1	32	MGAT4B;PPAP2B;CUTC;GAB2;FOXO1;LIFR;TSLP;SPSB1;NTRK2;NCOR2;ATXN7L1;AKAP1;CDC37L1;PLEKHF1;WASF3;APBB2;IRF2BP2;KLF9;LAMA4;TSC22D3;EXTL3;CD69;SMARCD2;FGFR1;SLC40A1;CCND1;GLUL;TEX2;CREB3L1;SYBU;SLC1A3;AMOT
STXBP2	32	CD53;DOCK2;MYO1F;CD37;ARHGAP9;ARHGAP4;IKZF1;SPI1;CCDC88B;PIK3R5;ADAP1;DOK3;CARD9;PYCARD;LYN;PARVG;PLCB2;ITGB2;HK3;PRKCB;IFI30;FERMT3;CSF3R;HCK;WAS;SASH3;RPS6KA1;LST1;VAMP8;RIN3;PTPRC;GPSM3
CRIP2	32	TGFB1;EFHD1;TIMP3;PODXL;ZDHHC12;SPARCL1;LIMS2;PTK2;ADAM15;TEK;GAS2L1;NPDC1;SLC9A3R2;S1PR1;RGS5;LSR;ARHGDIB;FLYWCH2;PACSIN2;HEG1;PKN3;TSPAN7;INPP5A;ATP1A1;HYAL2;FAM107A;MEF2A;PTPRB;ESAM;NTHL1;RABAC1;CTTNBP2NL
ARHGAP31	32	EHD4;ZNF692;GIMAP4;MEOX1;TEK;ZNF629;ETS1;LSR;JAG2;TNFRSF8;CDH5;PPP1R13B;ZNF248;HEG1;FLI1;CYYR1;MON2;TSPAN7;GLMN;GIPC2;ELFN1;FAM171A1;ADCY4;AIF1L;GIMAP6;PCDH1;MCC;ELK3;UTRN;BMPR2;MIEF1;CLK1
ARHGAP6	32	STIM1;ANPEP;TIMP3;SLC7A2;CYP4B1;INPP4B;CD4;ELF1;RASAL2;PARM1;RAB8B;NCOA3;MAML2;SOX13;MKL1;DENND3;ARHGDIB;MBNL1;ANGPT1;PACSIN2;MAP1B;FAM102A;RASSF4;LGALS3BP;IGFBP7;KCNB1;CYP4X1;MAN1A1;BMP2;ITM2A;PNMT;ARHGAP10
ITPKC	32	ACVR1B;NFKBIA;ZNF697;SPRY1;AKAP13;SEMA4B;SERTAD4;ZBTB16;GADD45B;MAP3K6;ZNF385D;FAM110D;PHC2;IRAK3;MYC;SLCO4A1;TSC22D3;RALGAPA2;FBXO31;C10orf10;IL4R;LONRF1;CCDC71L;TLDC2;MTUS1;GRAMD1A;SBNO2;SH3TC1;TENC1;NNMT;KLF9;SYBU
PARM1	32	EFHD1;TIMP3;FILIP1L;TSPAN12;RCAN2;SLC7A2;RCSD1;SRGN;ARHGAP6;CD86;PPM1D;INPP4B;CSRNP3;THEMIS2;PRSS35;FHL5;AP1B1;PDE5A;LAMA3;DAAM2;RAMP2;ENO2;TEK;TSPAN7;ANKRD29;TAGLN;EPAS1;TACC1;C1orf162;CYBA;ANGPTL1;LMOD1
SH3BP4	32	FXYD5;NUAK1;KIAA1671;CD34;KIF26A;DACH1;ERG;CLEC14A;RAPGEF2;ITGB4;TRMT13;GAS2L1;NEBL;XPR1;CDH5;HEG1;HOXB7;CYYR1;GLMN;GIPC2;SCML1;FAM171A1;HADH;ZNF521;FHOD3;ADCY9;SYT7;ELK3;UTRN;PTPRB;PTPRK;CCDC85A
SOX10	31	B4GALNT4;SCN7A;LGR6;B4GALNT1;PCSK2;SORCS1;SOX8;L1CAM;PLP1;PLEKHB1;PRIMA1;RELN;CLDN1;CADM4;ENTPD2;DHH;ITGB8;COL9A3;FOXD3;PAQR6;EMILIN3;SFRP5;GRIK3;NRXN3;FA2H;NRXN1;GFRA3;COBL;AATK;MPZ;MAL
SCAND1	31	C9orf16;OXLD1;C1orf122;TMEM259;NDUFB7;TRAPPC5;EVA1B;C16orf13;PRKCDBP;HSPBP1;CEBPD;FAM173A;FBXL15;C6orf226;ZNHIT2;MRPL34;JUND;CSNK1G2;JOSD2;UBALD1;GLTPD1;SELM;CHST12;NME3;COMTD1;ZNF865;H2AFX;ZNF428;HES4;CCDC85B;H2AFJ
ECM1	31	RECK;CD70;SPON2;OLFML1;EGFR;PAM;ITGBL1;FAM180A;MRC2;PAMR1;PPL;SLIT3;DNMBP;EMP3;MAP1A;ANXA4;FBN1;ABI3BP;EPS8L2;ANKRD28;DPP4;GALNT13;PLEKHG4;WNT2;ISLR;COL1A2;ANPEP;COL1A1;COL6A3;COL6A2;CD109
VIT	31	AOX1;ELANE;NOVA1;OLFML3;DCLK1;CELF2;PDGFRL;MYOC;FBLN2;FBLN5;RGMA;DCN;SCARA5;FSTL1;BSG;RASSF4;LAMA2;LTBP4;CALHM2;CYP4B1;EBF2;CXCL14;SLPI;OMD;CILP;ITM2A;GPR133;C1S;LPAR1;WNT11;SMARCD2
SELPLG	31	CLEC10A;CD4;ALOX5AP;F13A1;PSTPIP1;GPR34;CORO7;SERPINA1;CSF1R;IL1R2;CD200R1;TBXAS1;FGD3;ALOX5;KCNQ1;CYBB;HCK;WAS;SNX20;CD163;STX4;C1QA;ARHGAP30;CD14;PTPRC;FOLR2;FAM105A;GFRA2;TLR8;CMKLR1;CFP
ILK	31	MACF1;MYL6;MUS81;C9orf3;ZYX;MYL9;CALM1;TPM2;DNAJB5;TLN1;YWHAH;NEXN;TGFB1I1;DAPK3;IFITM1;PDLIM7;WDR1;VCL;PRKAG2;CFL2;IQCJ-SCHIP1;VASP;FLNB;TAGLN;CORO1C;CALU;MYO9B;CSRP1;FLNA;MCU;STK38L
APMAP	31	PCK1;DTX1;ACVR1C;SLC7A4;GLIS1;HTRA1;TMEM132C;TM7SF2;LGALS12;RORC;PDE3B;AQPEP;PNPLA2;ACY1;ACSS3;MOGAT1;USP30;HADH;PLA2G16;ANG;ORMDL3;LRIG1;GPT2;DNAH9;GLYCTK;PTPRF;PDK2;CHKA;TTC36;COX14;HEPACAM
WDR1	31	ILK;TPM2;CNTNAP1;GNG12;ZYX;MYL9;CHD3;NPTN;CALM1;CCDC88A;MICAL2;DNAJB5;IFI16;PPP1R12A;TGFB1I1;PIP4K2C;PDLIM7;SRF;RALGDS;GLIPR1;CCDC71L;EFNA5;VCL;MRC2;TSPAN2;GOLM1;TAGLN;BMP6;RUNX1;MYO9B;CSRP1
TTC7A	31	ZFHX4;KLHL29;DBN1;CD248;COL16A1;GSN;EPS8L2;EVC2;PPL;DLGAP4;SPTAN1;DNMBP;FGF16;NUMBL;IL17D;MAP1A;VASN;CALHM2;PCDHGC3;IGFBP6;C11orf89;ITPR3;LMNA;ARNT2;SEMA3C;SH2D4A;EMP3;WNT9A;EMP1;SNX21;TMEM43
HOXB7	31	FAM213B;GIPC2;MYRIP;CPD;SH3BP4;GLMN;KIF17;CLEC14A;CBX2;MAML3;ADAMTS9;ARHGDIB;CDH5;PDGFB;ERG;HOXB3;CYYR1;SLC25A27;GIMAP4;THOC1;GIMAP7;FRMD3;RPS6KA2;PCDH1;APP;ELK3;UTRN;ZNF792;PTPRK;ECHDC2;CCDC85A
NCK2	31	RRAD;SLC7A2;AGRN;CHN1;ARL15;NOTCH3;LZTS1;PAN2;TRMT13;GAS2L1;CPNE2;PEAR1;NR2F2;GUCY1A2;ARHGDIB;DNHD1;CDH6;SLCO3A1;COL18A1;IGFBP2;FCHSD2;GIPC2;FAM53B;GLTPD1;FRMD3;ZMAT1;SEMA5A;RNF182;RCSD1;NTHL1;C5orf54
KRT23	30	KRT77;FXYD3;S100P;CCDC64B;LYPD3;TFAP2A;TFAP2C;GJB6;ESRP1;LAD1;SCNN1A;TACSTD2;C5orf46;HSD11B2;AQP5;KIAA1324;RHOV;DSP;PIP;PADI2;EPCAM;SERPINB5;COL17A1;RAB25;SCGB2A2;MUCL1;CALML5;SFN;ZNF750;DCD
ITGB2	30	CD52;NCF2;CD53;CD37;LAPTM5;STXBP2;HCST;TREM2;PIK3AP1;LY86;SPI1;TYROBP;CD86;PYCARD;PARVG;LIPA;RAC2;TBXAS1;RPS6KA1;MMP9;IFI30;KCNAB2;FERMT3;CYBA;GRN;LCP1;SASH3;KCTD12;FBXL3;SLAMF8
EGFL6	30	MDFI;FGFRL1;FAM198B;ACVR1C;AP1M2;TLE2;SLC7A4;TMEM139;NPR3;HTRA1;P2RX6;TRDN;LBP;PPP1R1B;ASAH1;DNAH9;C6;MOGAT1;GLIS1;CHRDL1;CLPTM1L;STS;PTPN3;COX7A1;UCHL1;HPD;HADH;NPY5R;NPY1R;SNCG
MPZ	30	SCN7A;PMP2;TMOD2;SORCS1;MLIP;SOX8;LCNL1;PLP1;BCAS1;TNNT2;SOX10;MT3;PLEKHB1;CADM4;TMPRSS5;FOXD3;IL34;EMILIN3;BRSK2;SFRP5;GRIK3;NRXN3;FA2H;NRXN1;ANGPTL7;DRP2;GFRA3;AATK;MAL;CMTM5
DOK2	30	EFHD2;IL10RA;VSIG4;CMKLR1;GPR34;SPI1;CSF1R;CARD9;PIK3R5;PYCARD;AP1B1;ITGAM;MFSD1;CYBB;PTPN18;CFP;PLEK;PTPN6;ADCY7;IRF5;VAMP8;C1QC;ARHGAP30;CRYBB1;NRROS;FAM105A;GFRA2;KLC4;GAS7;LPAR5
PNISR	30	RBM5;ZRANB2;ZNF692;SRSF11;EED;ACAD11;PAXBP1;SEC31B;DDX17;FNBP4;DMTF1;LUC7L3;ZNF248;FUBP1;SGSM3;MYSM1;ARGLU1;THOC1;SREK1;RPS6KA2;LTV1;ACOX2;OGT;CCDC115;ROBO4;ZFC3H1;C17orf59;FAM117A;CLK4;ANKRA2
ADM5	30	THSD7A;TMEM255B;TACR1;SPNS2;DARC;SEMA4B;DUSP23;GPR146;CMIP;CPXM2;SULF2;MKL2;ZNF385D;FAM110D;ABCD4;MVP;IFITM1;SNTG2;EFNA1;CPLX1;SH2B2;KLHL3;IGFBP4;GPR68;CFI;RELL1;TESC;GNA14;HAPLN3;HPN
FBXO31	30	PHF15;RPGR;TEX30;ERG;SMAP2;SDPR;ZBTB16;MECOM;SCNN1G;ITPKC;TMEM204;EDN1;RALGAPA2;LRRC8A;NAGS;ENPP2;DLL4;MMP28;ARRDC2;ABLIM2;GIMAP4;LRMP;FRY;AGFG2;SH3TC1;GALNT18;LRCH1;SYBU;MYO5C;PTPRK
CD248	30	TIMP3;TM7SF2;TRERF1;SLC7A4;ZFHX3;MYL6;TTC7A;NCOR2;ARNTL;DRAM2;MFGE8;DENND2D;CLEC3B;ESYT1;APBB2;FSTL1;ANPEP;ELN;RAMP2;EBF2;PHLDB1;ARNT2;FGFR1;HADH;CCND1;ROCK2;ZNF423;ANGPTL1;ELOVL1;TMEM43
ESAM	30	FXYD5;EMCN;KIAA1671;SPARCL1;PTK2;CLEC14A;SH2D3C;PAXBP1;A2M;MYH9;NES;HSPA12B;ARHGDIB;ICAM2;CDH5;PRKCH;LRRC8C;PKN3;EFHD1;VASP;AIF1L;PCDH1;APP;CD93;CD2AP;MEF2C;ELK3;ZBTB46;TMEM47;CRIP2
CLEC3B	30	BAG3;TIMP3;CUTC;METRNL;CYP4B1;SAMD4A;FBLN2;CD248;GSN;FSTL1;TPPP3;S100A4;PENK;NUMBL;CAB39L;MAP1B;ELN;ANGPTL1;GAB2;IGFBP6;MBNL1;USP30;MAN1A1;CST3;BMP2;CCDC80;MASP1;PARD3B;EMP1;HERC5
MSR1	30	ACP5;FKBP10;LAPTM5;ST14;ZMYND15;CD300LB;HCST;TREM2;IQGAP2;LY86;KYNU;TYROBP;CCDC88A;MPP1;GLIPR1;FGR;CD86;PIK3R5;TTYH3;MNDA;LIPA;TFEC;TM6SF1;IFI30;LCP1;NPL;C1orf162;TREML1;ALCAM;FBP1
FAM180A	30	PDGFRB;ANKRD13B;TIMP2;RECK;ECM1;P4HA2;PAM;ITGBL1;SCARA3;FAM180B;PCNXL2;PPL;DPP4;GCA;MAP1A;VASN;COL16A1;ANKRD28;GALNT12;ZDHHC7;PRRG3;ISLR;DKK3;FAT1;ARHGAP12;WNT9A;COL8A2;NFIX;MMP2;CTHRC1
PEAR1	30	BCL2L1;FAM213B;NUAK1;MYO1B;TBX2;CCDC39;EPS8;NEURL1B;LINGO1;PLOD1;ADAMTS9;ARHGDIB;PLXND1;CDH5;LZTS1;PRKCH;PDGFB;CARD10;LRRC8A;MINA;ZNF362;IGFBP2;EBF2;HID1;RPS6KA2;CHST15;NCK2;NOTCH3;PRR12;AGFG2
IGFBP6	30	NRSN2;RASSF5;PDGFRL;SPRYD3;TTC7A;STXBP6;SAMD4A;DBN1;PPTC7;GSN;DCN;FAM180B;CLEC3B;FAM46A;FGF18;MEDAG;CALHM2;DCLK1;UAP1;ADA;WSCD2;OMD;ISLR;ACKR3;CILP;ANGPTL5;WNT9A;EMP1;GFPT2;SNX21
CLK1	30	MORC3;RBM5;SAT1;NUAK1;C15orf38;EED;LSMEM1;LUC7L;THOC1;ZNF629;SF3A1;NOVA2;CDH5;VPS13C;HEG1;TRIM44;PSME4;NHSL2;MTPN;NR2C1;MON2;IFRD1;GLMN;GIMAP6;ASUN;ERLIN1;NYNRIN;ARHGAP31;UTRN;MARS
FRY	30	RABGAP1;CCNG2;EPS8;GIMAP5;ELF1;RASAL2;SERPINE1;DENND3;SMAP2;ZBTB16;MECOM;S1PR1;IRF2BP2;KLF2;CDKN1B;PDIA5;NEXN;PRKCH;FBXO31;DDIT4;LRRC8C;MYCT1;TSC22D3;MTUS1;DLL4;ARRDC2;RHOB;LRCH1;PTPRB;FOXC1
ARHGAP4	30	CTTN;STAB1;IL10RA;NCF4;DOCK2;VSIG4;TMC8;LIMS2;NPDC1;DEF6;PREX1;CCDC88B;DOK3;CARD9;PRSS36;PYCARD;TRPM2;PLCB2;ALOX5;ALOX5AP;CYBA;HMHA1;WAS;EPAS1;CD163;C1QB;C1QA;AIF1;STXBP2;EBI3
RGS5	30	FAM198B;SPARCL1;ELF1;FBLN2;P2RY14;SLC38A11;ARHGDIB;HRC;VIPR1;MBNL1;CITED1;SCN4B;FLYWCH2;PACSIN2;FRZB;RASSF4;FAM69B;TSPAN7;CENPV;MAN1A1;CHST7;COX4I2;MASP1;EZR;FAM107A;UTRN;ATP1A1;WIPF1;CTTNBP2NL;CRIP2
CCDC107	30	FAM198B;ACVR1C;RRAD;NDUFB7;CRYAB;ITGA7;JPH2;LGALS1;RAB8B;SLC39A11;SRCRB4D;NEXN;MBNL1;MYO9B;HSPB7;SLC24A3;GPC1;TEX261;COX7A1;FADS3;PPP1CB;PISD;FBXL3;ITGAV;SNCG;PALLD;PDK2;GNA13;SORT1;OSER1
SIK1	29	EPB41L4A-AS2;CCRL2;SPRY2;SPRY1;GRASP;SOX17;NEDD9;ITPRIP;CSRNP1;C8orf4;TMCC3;HBEGF;INHBB;FOSL2;PRR26;DUSP1;CLDN5;SRGN;DLL1;PER1;MTFP1;TSPAN6;ABHD6;APOLD1;SNRK;ADRB2;HES1;PDE4B;RNF122
PLIN1	29	TUSC5;MYH14;C1orf213;EPB41L4B;GPD1;SORBS1;GYG2;PPP1R1A;PPP1R1B;PC;PDE3B;AQPEP;PNPLA2;HOOK2;LPL;RBP4;CNTFR;SCRN2;NAT8L;MARC1;CIDEA;PLA2G16;GPT2;PFKFB1;ALDH2;PTPRF;AGPAT2;GABRE;TTC18
MKI67	29	BUB1B;PLK1;CEP55;PKMYT1;FOXM1;PRC1;MYBL2;KIF2C;IQGAP3;TPX2;NUSAP1;CDK1;CDCA3;AURKB;CDCA5;PTTG1;ASF1B;TOP2A;CENPM;SPAG5;NUF2;CENPF;ANLN;TK1;CCNA2;CCNB2;H2AFX;KIF23;TYMS
DNASE2B	29	CD52;ACP5;ASPHD1;KMO;DOCK3;IGSF6;MFSD12;FBP1;NCEH1;PGBD5;CCSAP;CHIT1;FGR;PLA2G7;APOBR;LIPA;CD22;DCSTAMP;CAPG;FAIM3;STX4;CYP27A1;MYO9B;SLAMF9;NCAPH;SLC1A4;IFITM10;MATK;IL24
CD2	29	KLRB1;ANO9;CCR2;SH2D1A;CD6;RASGRP1;TRAT1;FAM46C;ZAP70;SAMD3;TRAF3IP3;LIMD2;ITGB7;CD27;TBC1D10C;CD3E;LTB;CD8A;ITK;GZMA;TAGAP;GZMM;C11orf21;RLTPR;GZMK;GPR171;CD3D;LCK;SLAMF1
GIMAP6	29	DOLK;MFNG;ST6GAL1;KIRREL;GIMAP4;HPS6;PPM1F;GIMAP7;ZNF629;NDST1;NUAK1;PPP1R16B;DCHS1;TGFBR2;HEG1;MON2;NOVA2;TSPAN9;RPS6KA2;RAB11FIP5;PCDH1;LDOC1L;NYNRIN;ARHGAP31;ERG;ZNF792;CCNH;CLK1;RGP1
TPX2	29	MKI67;BUB1B;PLK1;ZWINT;CEP55;PKMYT1;FOXM1;PRC1;MYBL2;KIF2C;IQGAP3;NUSAP1;CDK1;AURKB;CDCA5;PTTG1;ASF1B;TOP2A;SPAG5;NUF2;CENPF;ANLN;CCNB2;CCNB1;E2F1;KIF23;TYMS;CKAP2;UBE2T
AATK	29	SCN7A;LCNL1;B4GALNT1;TMOD2;SORCS1;SOX8;PMP2;GAL3ST1;PLP1;NCAM1;BCAS1;DRP2;KIF19;FOXD3;NKAIN4;NLGN3;TMPRSS5;COL9A3;PAQR6;EMILIN3;BRSK2;SFRP5;GRIK3;SOX10;GFRA3;FAM101A;MPZ;MAL;CMTM5
FLNA	29	RASSF3;ILK;JPH2;CORO1C;ARHGEF10L;ZYX;MYL9;TPM2;TLN1;ST5;PYGB;MARVELD1;DMPK;REEP1;PRKG1;SLC26A10;PDLIM7;EHBP1L1;NCS1;CSRP1;TRIM44;PLEKHO1;TAGLN;CCDC81;RBPMS;NPNT;PRUNE2;MYO9B;SORT1
PIK3AP1	29	CD53;NCF2;CCR1;IKZF1;SPI1;TYROBP;MAP3K1;SASH3;ADAP1;TNFSF8;TTYH3;LYN;ITGB2;RAC2;TFEC;IFI30;FERMT3;HCK;LCP1;CD180;PLEK;CYTH4;RBM47;VAMP8;GNA15;C3AR1;SNX20;CHPF;GPSM1
CYP4B1	29	BAG3;TIMP3;AOX1;CEP57;RASSF4;LGI4;ARHGAP6;GSN;WASF3;CLEC3B;CST3;CITED1;HSPB7;LAMA2;ANGPTL1;SMARCD2;CYP4X1;MAN1A1;ARNT2;CAB39L;ALDH4A1;BMP2;OMD;TACC1;CSF1;FAM107A;PARD3B;VIT;EMP1
LIFR	29	NPDC1;EPHA4;HIPK3;RAPGEF3;FAM13C;RASAL2;CDC37L1;ZBTB16;SOX13;MKL2;TIAM1;LPCAT4;TMEM204;PIK3R1;KLF9;LAMA3;KCTD12;WNK1;LRRC1;TSPAN7;ANKRD29;EPAS1;MED13L;TACC1;CCND3;FAM107A;LRCH1;SYBU;NTHL1
PDE1B	29	ANKRD53;CUTC;TSPAN15;ZNF697;FABP4;FBLN2;PMM1;KIAA0922;FNDC4;PCED1B;HDDC3;C19orf80;SCN4A;ETFA;NPR3;HSPB8;PJA1;TNIP1;CLU;KIFC3;ABHD5;MLYCD;ANG;SDC3;FMNL2;GLYAT;PDK4;KIAA1239;ABCC1
IL10RA	29	CLEC10A;NCF4;DOCK2;ARHGAP4;IQGAP2;CORO7;P2RY14;GLIPR1;CSF1R;CD86;DOK2;PIK3R5;THEMIS2;RNASE1;TBXAS1;FGD3;RNASE6;FOLR2;GFRA2;ADCY7;CPVL;PTPN18;IRF5;C1QA;ITGAM;TLR4;SLCO2B1;FUCA1;CFP
ZMAT1	29	AAAS;ZRANB2;PPRC1;FAM160A2;KIAA1407;ATP9A;ODC1;ENOSF1;NHLRC3;TLN2;HSD17B8;PGP;DMTF1;C5;INTS3;MTR;PREPL;TTC18;RRP12;RPUSD1;GLTPD1;CIDEA;PLA2G16;NCK2;ECHDC2;GABRE;TMEM42;NRBP2;SLC25A27
CD93	29	EHD4;MFNG;EMCN;KIF26A;PTK2;CLEC14A;CMIP;NEURL1B;ECSCR;FZD6;S1PR1;MYH9;SPARC;ARHGDIB;PHC2;CDH5;RALGAPA2;PRKCH;SLC44A2;FAM129B;ELTD1;SPARCL1;IGFBP2;IGFBP7;GPR3;RPS6KA2;ESAM;PLVAP;TSPAN7
SRGN	29	TSPAN13;LAPTM5;SAMSN1;EDNRB;RELT;PARM1;RGAG4;SDPR;ITPRIP;SIK1;S1PR1;GPR183;TMCC3;THEMIS2;FOSL2;CLDN5;TBXAS1;EPAS1;TSC22D1;SLA;CYBA;TSPAN6;PELI1;APOLD1;RAB20;TM6SF1;TACC1;EZR;FAM107A
LNX1	29	IGIP;SGK223;CEPT1;CCDC68;KIF17;LDLRAD4;ATP9A;RAPGEF3;RASAL2;C10orf137;NHLRC3;SDPR;MYRIP;DSC2;NRG2;PTPRB;NR3C2;LRRC8C;HID1;TSPAN6;MED13L;TACC1;APP;MCC;LRCH1;GNRH1;KIAA1217;GPIHBP1;CCDC85A
MAPK4	29	NCKAP1L;DOCK3;NCS1;KCNMA1;SHROOM3;P2RX1;IGSF9B;MROH7;ITIH3;ASB2;CASQ2;MPP7;CPNE6;SLC8A1;HSD17B6;RIMS3;SLC38A1;WNK2;WFDC2;ZEB1;JPH2;RAB9B;FAXC;ETV6;CCDC81;KCNH2;COL1A2;PI15;PDE4D
CALML5	28	KRT77;FXYD3;CCDC64B;KRT2;KRT5;S100A14;LYPD3;TFAP2A;DCD;KRTDAP;GJB6;ESRP1;LAD1;PVRL4;C5orf46;KRT23;RHOV;DSP;FAM84A;SERPINB5;COL17A1;RAB25;SCGB2A2;MUCL1;SFN;KRT10;ZNF750;TFAP2C
FA2H	28	B4GALNT4;PMP2;FXYD3;B4GALNT3;SORCS1;FBXO2;C2orf82;BCAS1;RAP1GAP;SOX10;PLEKHB1;KLF5;CLDN1;CADM4;ITGB8;TMPRSS5;FOXD3;KLK1;PAQR6;EMILIN3;SFRP5;NRXN3;SOX8;TFAP2A;COBL;ARHGAP39;DRP2;MPZ
EPSTI1	28	IFIH1;PSMB10;ODF3B;MX1;UBE2L6;RTP4;IL18BP;IFIT2;IFI44L;STAT1;CMPK2;OAS1;OAS2;ISG15;LY6E;PARP9;BST2;TRIM21;PSME1;HERC5;HERC6;DDX60;SAMD9L;IRF7;TYMP;PSMB9;PSMB8;BATF2
VSIG4	28	NCKAP1L;STAB1;LYVE1;DOCK2;ADORA3;ALOX5AP;LGI2;ARHGAP4;GPR34;MARCO;DOK2;DOK3;S100A9;ITGAM;RNASE1;HK3;CYBB;PTPN18;CD163;C1QC;C1QB;C1QA;SIGLEC1;C1orf162;CD14;CFP;AIF1;FOLR2
GNAZ	28	SGK223;KALRN;ZNF697;ADAMTS18;RERE;KLF11;KAZN;CCSER1;DSC2;PTGER2;TTLL10;SCN4A;NRG2;ACSS2;MGAT1;AR;TSPAN6;CD36;CHST2;BMP6;AIF1L;GJA5;AKAP2;SDC3;CA4;ADRB2;PDK4;TMEM47
CCDC80	28	FAM198B;LUM;CUTC;ECM2;CNTN3;MFAP4;COL3A1;FBLN2;LOX;LAMB2;PAM;GCHFR;CLEC3B;FSTL1;SPARC;TBX15;FMOD;PCOLCE;PI16;MAP1B;LGALS3BP;PIGT;CLU;COL5A2;SFRP4;MASP1;STK38;PPIC
SLCO2B1	28	TNFSF13;CLEC10A;STAB1;IL10RA;LYVE1;DOCK2;LGI2;GPR34;RGL1;CSF1R;HCLS1;AP1B1;FCGRT;TRPM2;MVB12B;HCK;WAS;SLA;CD163;C1QC;C1QB;C1QA;PLTP;TBC1D14;MAF;MYO7A;EBI3;FOLR2
GIMAP4	28	GIPC2;ST6GAL1;CPD;SMAD1;ERG;CLEC14A;GIMAP6;ZNF629;ELK3;MECOM;MKL2;ELTD1;CDH5;TGFBR2;PDIA5;FRAT1;HOXB7;SPARCL1;GIMAP8;TSPAN7;GIMAP5;THOC1;GIMAP7;ARHGAP31;FBXO31;PSMB9;PSMB8;PTPRK
RASAL2	28	DMRT2;DOCK9;LIMS2;LDLRAD4;LIFR;EPS8;CCDC85A;ELF1;ARHGAP6;C10orf137;NCOA3;SDPR;GAS2L1;DENND3;TMEM204;ARHGDIB;PACSIN2;LNX1;FRY;MED13L;TACC1;AVPR2;LRCH1;MEF2D;BAIAP2;PTPRB;PTPRK;CTTNBP2NL
ARID5B	28	ZNF217;SESN1;ANTXR2;SIDT2;GLUL;AKAP13;CPSF4;PNRC1;CDC37L1;MAP3K8;SLC39A14;TRAM2;CISH;RGS3;B4GALT1;C10orf10;CCDC71L;TLDC2;FOSL2;LRRC17;DDR1;TCF7L2;NNMT;STON1;GRB10;NAB2;HOXA9;SLC1A3
GPR133	28	CD70;DCLK1;PDGFRL;TENM1;STXBP6;DBN1;ACKR3;DCN;SCARA5;FSTL1;PDE7A;PXN;PI16;HAS1;PROCR;RPS21;UAP1;NHSL1;FBN1;DKK1;MMP27;SMAD3;SLPI;TNFAIP2;VIT;STK38;GFPT2;DEDD2
CFI	28	NPDC1;YJEFN3;TMEM255B;SPNS2;DARC;DUSP23;TLL1;THSD7A;ECSCR;CPXM2;SULF2;ZNF385D;TIAM1;LPCAT4;C10orf128;ADM5;IFITM1;PLCB4;CYYR1;CPLX1;CMIP;IL33;PRKAR1B;TACR1;COL15A1;TESC;TMTC2;TSPAN7
SF3A1	28	FXYD5;ATF7IP;IGIP;ZFAND3;LUC7L;MLLT1;SMC1A;PSME4;NR2C1;POLR2A;MCM2;BATF3;GLMN;RPRD2;NFIC;YTHDC1;SHFM1;ORMDL1;MED13L;APP;CCDC84;UTRN;ARHGAP12;CCDC85A;MBD3;CLK1;SCFD2;CREBBP
AQP9	28	CD52;ASPHD1;CD72;KMO;DOCK3;CD300LF;ST14;CD300LB;LTA4H;ALCAM;FBP1;FGR;PLA2G7;APOBR;MNDA;METTL7B;LIPA;NLRC4;RPS6KA1;CTSD;DCSTAMP;IL1RN;SDS;C19orf59;CYP27A1;TREML1;SLAMF9;IL24
GZMM	28	KLRB1;SH2D1A;ITGA4;RASGRP1;CD2;GZMK;NKG7;PTPRCAP;TRAT1;FAM46C;ZAP70;SAMD3;LIMD2;MS4A1;NUP210;CST7;SKAP1;CD8A;IL2RB;GZMA;IL2RG;CD3D;C11orf21;RLTPR;CD3E;RUNX3;TBC1D10C;LCK
PAM	28	RECK;SRRM2;ECM2;ECM1;PCOLCE2;DPT;LAMB2;CLSTN1;DCN;FAM180A;CHD3;ASPN;FSTL1;PXN;FGF14;IL17D;RPS21;MRC2;ABI3BP;SEMA3C;SFRP4;CCDC80;COL14A1;CILP;SLC23A3;OGN;ANGPTL2;GFPT2
SHROOM3	28	RASSF3;PRKAG2;BMPR1B;TRPC4;NCALD;INHBA;MAPK4;SYNDIG1;HSD17B6;GREM2;HSPB3;C1orf226;WNK2;RXRA;PPP2R2C;CFL2;WFDC2;RAB23;FAXC;TMEM61;ETV6;VPS13A;CCDC81;KCNH2;RNF180;PCDH7;FAT3;PDE4D
OLFML3	28	AOX1;TUBA8;CUTC;ZFHX4;DCLK1;FBLN2;FBLN5;DCN;WASF3;FSTL1;OLFML1;PCOLCE;SPOCD1;LAMA2;ELN;PCDHGC3;SMARCD2;CORO2B;ZEB1;CXCL14;LRRN3;FBXL7;CILP;COL1A2;ANPEP;VIT;IL11RA;KIFC3
ARRDC2	28	RRAD;SLC29A2;LRRC8A;DENND3;S1PR1;SLC38A2;CSRNP1;IRF2BP2;SLCO4A1;KLF9;FBXO31;PRKCH;DDIT4;ST3GAL5;SH3RF1;TSC22D3;TIPARP;RHOB;FRY;ANKS1A;BCAR3;GPR3;INPP5D;SH3TC1;NEDD9;LRCH1;BAIAP2;IFNGR1
MYO9B	28	ACP5;KMO;GLA;ILK;MFSD12;TBC1D8;CHML;TFEC;CCDC107;ALCAM;MICAL1;DOCK3;SPOCD1;HMG20B;DNASE2B;WDR1;PSME4;DCSTAMP;ARAP1;SDS;CLEC4G;STX4;TCIRG1;AGPAT4;GNA13;CCDC88A;FLNA;IFITM10
CD4	28	TNFSF13;REM1;SELPLG;LPPR4;RCSD1;F13A1;ARHGAP6;CSF1R;INPP4B;CSRNP3;ARHGDIB;HCLS1;AP1B1;SCN4B;RNASE1;LAMA1;TBXAS1;DAAM2;KCNQ1;WAS;CXCL14;PTPN18;MPPED2;C1QC;C1QA;ARHGAP18;AIF1;FOLR2
SERPINB5	27	KRT77;VSNL1;CLCA2;S100A14;SPINT1;LYPD3;TFAP2A;TFAP2C;GJB2;GJB6;PLCH2;ESRP2;ESRP1;LAD1;PVRL4;TACSTD2;C5orf46;AQP5;KRT23;RHOV;DSP;COL17A1;RAB25;CALML5;SFN;GRB7;ZNF750
EPHB4	27	NOVA2;KIF26A;SPNS2;ADAM15;SH2D3C;SOX18;KLF16;LHX6;C20orf112;SMG9;PIK3R3;FAM129B;JAG2;MYD88;HEG1;KIAA1211L;ELFN1;ADCY4;AIF1L;SEMA3F;CCM2L;HYAL2;NYNRIN;ID1;PPP1R13B;ZBTB46;PCDH1
CEP55	27	MKI67;BUB1B;PLK1;ZWINT;PKMYT1;FOXM1;MYBL2;IQGAP3;TPX2;NUSAP1;CDK1;CDCA5;PTTG1;ASF1B;TOP2A;CENPM;NUF2;CENPF;ANLN;TK1;CCNA2;CCNB2;E2F1;H2AFX;TYMS;CKAP2;UBE2T
GFRA3	27	B4GALNT4;SCN7A;LGR6;PCSK2;TSPAN11;PMP2;L1CAM;PLP1;SOX10;PRIMA1;RELN;CLDN1;CADM4;NKAIN4;ENTPD2;COL9A3;FOXD3;EMILIN3;GRIK3;NRXN3;NRXN1;PTCH2;AATK;FAM101A;MPZ;MAL;CMTM5
FHL5	27	PTK2;RCAN2;SLC7A2;CHSY3;EFHD1;RCSD1;SORBS2;PARM1;LPHN3;TMEM38B;INPP4B;NR2F2;JAG1;PDE5A;CDH6;RASL11A;COL18A1;EPHA3;GUCY1B3;IGFBP7;MERTK;DNAJB4;EDIL3;NOTCH3;SYNPO2;PACSIN2;C2orf40
HYAL2	27	RASIP1;PODXL;ADAM15;SH2D3C;GRASP;THBD;ADAMTS1;SLC9A3R2;S1PR1;SOX13;CBFA2T3;HSPA12B;PIK3R3;LCN10;JAG2;PRKCH;EPHB4;WNK1;GATSL3;KIAA1211L;PLEKHG1;SEMA3F;CCM2L;ABI3;CCND3;CTTNBP2NL;CRIP2
SORCS1	27	B4GALNT4;SCN7A;PMP2;NRXN1;NCAM1;BCAS1;TNNT2;SOX10;MT3;KIF19;PLEKHB1;PRIMA1;CADM4;ITGB8;FOXD3;EMILIN3;SFRP5;GRIK3;NRXN3;FA2H;AK5;ANGPTL7;DRP2;TAC1;AATK;MPZ;MAL
RUNX3	27	KLRB1;SKAP1;ITGA4;CD5;CD7;IKZF1;NKG7;TRAT1;PLCH2;ZAP70;CXCR4;NUP210;CST7;DUSP2;CD8A;LY9;CD69;SH2D2A;RHOH;DENND1C;ITK;IL2RG;GZMM;GZMK;PTPRC;SPOCK2;CD3E
SCN4A	27	ANKRD53;EFNB1;SGK223;KALRN;ZNF697;CCRL2;FABP4;GPR56;FMNL2;PDE1B;PTGER2;HDDC3;ETS1;TTLL10;HECW2;MGAT1;TNIP1;AIF1L;GJA5;GNAZ;CA4;TCF15;ADRB2;CASKIN2;PDK4;ZBTB46;KIAA1217
SH2D3C	27	EHD4;RASIP1;HYAL2;ZNF692;EPHA2;RARA;SOX18;PPFIA3;AHDC1;FAM110D;NEURL1B;LYL1;ZBTB46;EPHB4;KIF26A;KIAA1211L;APLNR;CCM2L;ABI3;NOTCH1;EGFL7;ELK3;PPP1R13B;ESAM;PCDH1;BCL6B;PRKD2
DCLK1	27	PPAP2B;NOVA1;OLFML3;EGFR;TENM1;ADAM33;STXBP6;DBN1;TNFAIP2;DCN;PODN;FAM180B;SCARA5;ZNF385B;FSTL1;PXN;FGFR1;GPR133;IGFBP6;CORO2B;RNF19A;DKK1;CILP;VIT;SH3PXD2B;GFPT2;LPAR1
CLDN1	27	SCN7A;TOX;LGR6;FXYD3;B4GALNT3;TSPAN11;SOX8;BCAS1;TNNT2;SOX10;ESRP1;KLF5;ENTPD2;DHH;ITGB8;KLK1;C19orf33;EMILIN3;SFRP5;GRIK3;FA2H;NRXN1;ANGPTL7;TFAP2A;GFRA3;COBL;PAK3
VAMP8	27	CD53;NCKAP1L;DOCK2;STXBP2;CYP2S1;PIK3AP1;ARHGAP30;SPI1;TYROBP;SASH3;DOK2;CARD9;GNA15;MFSD1;HK3;IFI30;FERMT3;CYBA;WAS;PTPN6;EDA2R;LST1;C1orf162;WDFY4;AIF1;BTK;GPSM1
ANKRD53	27	EFNB1;GLIS1;EPB41L4B;TSPAN15;IFNGR2;SCN4A;PHLDA3;P2RX6;FMNL2;PDE1B;ASPH;ESYT1;MAP3K5;C19orf80;PJA1;MCM6;MGAT3;VEGFA;PTPN3;CENPV;ABHD5;IRS2;MAOB;ELOVL5;MRPL46;GABRE;KIAA1239
ANGPTL5	27	RECK;TIMP2;PCOLCE2;ITGA11;MYOC;DBN1;RGMA;DCN;FAM180B;SERPINA5;SCARA5;FNDC1;QPCT;CYBRD1;PLXDC2;TRIM29;ANXA4;IGFBP6;ABI3BP;MMP27;PDGFRL;OMD;NTN1;LTBP2;DKK2;CILP;ABCC1
KCNQ1	27	TNFSF13;LYVE1;NCF4;DOCK2;CD4;ALOX5AP;GPR34;P2RY14;CSF1R;SELPLG;TNFSF8;AP1B1;RNASE1;TBXAS1;CYBA;WAS;PTPN18;C1QC;C1QA;CD14;GNA15;COLEC12;FAM105A;GFRA2;TGFBI;AIF1;FOLR2
HADH	27	MDFI;ACADS;TM7SF2;ACVR1C;PCBD1;PEX19;CD248;TMEM132C;PPP1R1B;PDE3B;ETFA;APMAP;GLIS1;SCML1;HSDL2;CIDEA;SH3BP4;PLA2G16;GPT2;ALDH1L1;CEPT1;L3MBTL1;EGFL6;PDK2;CRLS1;ECHDC2;TMEM43
ANGPTL1	27	CNST;TIMP3;PPAP2A;MAMDC2;CYP4B1;LIMS2;LDLRAD4;ATP9A;FAM83G;PARM1;PELI1;WASF3;CLEC3B;CD248;PIK3R5;THEMIS2;MBNL1;FLYWCH2;KLF9;KCNAB2;CYBA;CST3;ST6GALNAC6;RAMP2;TAGLN;BMP2;TACC1
NCF4	27	STAB1;IL10RA;DOCK2;ADORA3;ARHGAP9;LGI2;ARHGAP4;PSTPIP1;SPI1;CCDC88B;CSF1R;DOK3;PRSS36;TRPM2;FGD3;RNASE6;KCNQ1;WAS;CYTH4;C1QA;SIGLEC1;CD14;GNA15;FOLR2;MYO7A;AIF1;BTK
FGR	27	CD52;FKBP10;LAPTM5;CD300LB;TREM2;CD300LF;MYL9;DNASE2B;KYNU;PLA2G7;PIK3R5;TNNI2;APOBR;MSR1;PARVG;TFEC;IL1RN;C1orf228;IFI30;AQP9;SLC15A3;KCNAB2;TM6SF1;SDS;RPS6KA1;WDFY4;FBP1
IGFBP7	27	SERPINF2;RASSF4;RCSD1;ARHGAP6;FILIP1;INPP4B;NR2F2;CLIP2;ARHGDIB;FHL5;MBNL1;DPP4;RRAGD;FAM102A;RASL11A;COL18A1;CHSY3;LGALS3BP;IGFBP2;TSPAN7;COL4A1;C1orf54;SPARCL1;HEPH;OLFML2B;CD93;PPIC
IFITM10	27	ASPHD1;KMO;DOCK3;ST14;MFSD12;CD300LB;F13A1;DNASE2B;CHML;PGBD5;CCSAP;ALCAM;PPAPDC1A;TNNI2;TMEM206;SPOCD1;HMG20B;GNA13;CTSD;CAMK2B;DCSTAMP;TESK1;SDS;TREML1;MYO9B;SLAMF9;MATK
DACH1	27	ZBTB18;EMCN;TCF4;REM1;KIAA1671;RUNDC3B;SPARCL1;SH3BP4;CDC7;NEDD9;MAML2;MAML3;MECOM;MYH9;GNG11;ARHGDIB;XPR1;CDH5;NR3C2;PLS3;LRRC8C;MYCT1;FAM69B;GIPC2;MCC;MEF2C;TM4SF18
COL6A3	27	PDGFRB;PDGFRA;ANKRD13B;PCED1B;ECM1;CNTN3;SLAIN1;CORO2B;NLRC4;C11orf96;SPINT2;MRC2;PCOLCE;SPON2;TRIO;COL6A1;COL5A2;CRMP1;COL5A1;ABI3BP;ANKRD28;LAMB1;COL1A2;ANPEP;COL1A1;SH3PXD2B;COL6A2
KCNAB2	27	CD52;CD37;LAPTM5;ST14;TREM2;NCEH1;TYROBP;PPT1;FGR;PIK3R5;APOBR;PYCARD;PARVG;ITGB2;RAC2;IFI30;TSPAN7;SH3BGRL;LCP1;TM6SF1;FBXL3;WDFY4;LRCH1;ANGPTL1;SLAMF8;HLA-DMB;MATK
CD34	27	ANPEP;TEX30;GRIK5;SH3BP4;FABP4;FBLN2;ITIH3;ARHGEF3;FSTL1;DNMBP;GEM;RIMS3;ETFA;PRKCH;RAMP1;PCDHGC3;TSPAN7;CORO2B;HRC;ZNF521;CCND1;RBPMS;CILP;ZNF423;ATP1A1;ABCC1;TMEM43
DRP2	26	PMP2;TMOD2;SORCS1;MLIP;TNNC1;KIF19;BCAS1;RAP1GAP;GAS2L3;MT3;RBM11;MBP;TMPRSS5;FOXD3;PAQR6;PTPN5;EMILIN3;SFRP5;GRIK3;FA2H;SLC2A1;ANGPTL7;AATK;FAM101A;MPZ;ARHGAP19
RAMP3	26	CSF2RB;EFNB2;NPDC1;SLC6A6;DARC;TEK;PREX1;ADRA2C;ETS2;FCN3;CLIC2;TSHZ2;SLCO2A1;CYYR1;LDB2;IL33;ITPR1;ST6GALNAC1;PLA1A;EPAS1;GNA14;BMPR2;ABCC4;STEAP3;PRCP;SELP
LYVE1	26	CLEC10A;STAB1;VSIG4;ALOX5AP;ABCA8;LGI2;F13A1;MARCO;RGL1;IL12RB2;CSF1R;CD200R1;ITGAM;RNASE1;MAF;KCNQ1;CYBB;CRYBB1;MPPED2;CD14;COLEC12;CFP;SLCO2B1;TGFBI;MYO7A;FOLR2
C1S	26	AOX1;CUTC;SLC7A6;SERPING1;NGFR;SNED1;SMOC2;BICC1;FBLN5;DCN;SVEP1;FSTL1;SPOCD1;ISM1;CHRDL1;PLA2G2A;GPC3;SERPINF2;CLU;LRP1;FAM65C;NNMT;VIT;C1R;PTPRS;ASAP3
STAB1	26	CLEC10A;ASPHD1;LYVE1;NCF4;KMO;VSIG4;ALOX5AP;LGI2;ARHGAP4;F13A1;GPR34;SLC9A9;PRSS36;TRPM2;RNASE1;ALOX5;SLCO2B1;CYBB;CD163;SIGLEC1;CD14;MAF;TGFBI;MYO7A;AIF1;FOLR2
MAL	26	B4GALNT4;SCN7A;B4GALNT1;SORCS1;MYOT;L1CAM;PLP1;SOX10;PLEKHB1;RBM11;PRIMA1;FOXD3;CADM4;DHH;COL9A3;TMPRSS5;EMILIN3;BRSK2;SFRP5;GRIK3;NRXN3;NRXN1;GFRA3;AATK;MPZ;CMTM5
INPP4B	26	GRK5;RRAD;REM1;SLC7A2;CHSY3;CD4;LPPR4;ARHGAP6;PARM1;PELI2;MYH9;GUCY1A2;ARHGDIB;FHL5;TCF21;CDH6;CYBA;IGFBP7;CALD1;TAGLN;BMP2;FAM162B;FBXL3;PACSIN2;PICALM;MYO10
RASL12	26	ITGA8;MYH11;ACTG2;JPH2;NTF3;FAM46B;CACNA1H;PLEKHO1;CASQ2;TPM2;SGCA;ADRA2C;PRKG1;REEP1;DBNDD2;CSDC2;MRVI1;DNAJB5;CAMK2G;KCNAB1;TSPAN2;TCEAL1;WFDC2;CNN1;MUSTN1;SMTN
TAGLN	26	EFHD1;ILK;INPP4B;MYL6;PARM1;MYL9;LPHN3;PDE3A;TPM2;GNG12;PRKG1;NEXN;PPP1R14A;WDR1;SH3BGRL;CALD1;TM6SF1;ENDOD1;EDIL3;C1orf162;PICALM;ANGPTL1;CSRP1;FLNA;LMOD1;H2AFJ
FGF16	26	CD70;PCOLCE2;TTC7A;DBN1;DACT2;SCARA5;FNDC5;WNT10B;PAMR1;SPSB4;DNMBP;WSCD2;NHSL1;FBN1;C11orf89;SEMA3C;GALNT12;LRP4;SH3BGRL3;CDS1;ACKR3;EMP3;WNT9A;WNT2;GAS1;GAS7
CD70	26	RECK;ECM1;PCOLCE2;ITGA11;STXBP6;DBN1;ACKR3;SPSB4;ZNF385B;WNT10B;PAMR1;PSD3;DPP4;FGF16;TRIO;FAM19A5;NHSL1;FBN1;C1QTNF3;NTN1;WSCD2;GALNT13;WNT2;DKK1;GPR133;CDS1
CD14	26	CLEC10A;STAB1;LYVE1;NCF4;VSIG4;CCR1;F13A1;GPR34;RGL1;CSF1R;SELPLG;TRPM2;NINJ1;KCNQ1;CYBB;HCK;CD163;C1QC;C1QB;C1QA;GNA15;FOLR2;FAM105A;MYO7A;AIF1;TBC1D14
UAP1	26	LGR4;CCDC109B;SCG5;PCOLCE2;DBN1;LUC7L;HTRA3;ADAMTS5;TPPP3;MEDAG;PI16;HAS1;HAS2;PROCR;WNT9A;IGFBP6;TRIP10;MMP27;PDGFRL;CAB39L;SEMA3C;GPR133;RADIL;STK38;GFPT2;SNX21
AIF1L	26	MESDC1;EFNB1;SGK223;TMEM88;NOVA2;PREX1;FMNL2;SLC9A3R2;HSPA12B;ETS1;SCN4A;FGF12;PPP1R16B;HEG1;EPHB4;ACSS2;MFSD6;MGAT1;ZBTB46;GNAZ;TCN2;ARHGAP31;ADRB2;CASKIN2;ESAM;KIAA1217
SLC8A1	26	SYNM;ACTG2;DES;TMEM252;BCHE;MYOCD;LGI3;DAB1;ASB2;TMEM35;MPP7;CAP2;MAPK4;REEP1;HSD17B6;PI15;WNK2;PRKCB;MCHR1;TSPAN2;COL4A6;TCEAL1;DTNA;CENPW;RAB9B;KCNH2
SCARA5	26	ADD3;OLFML1;NOVA1;DCLK1;PDGFRL;ADAM33;DBN1;HTRA3;FAM180B;ZNF385B;TPPP3;GPR133;RGMA;FGF16;ANXA4;FBN1;PLA2G2A;ISLR;SLC17A7;ACKR3;CILP;ANGPTL5;VIT;GFPT2;LPAR1;GAS7
GLUL	26	EGFLAM;PPAP2B;ANTXR2;SLC7A6;FCN2;SIDT2;CPSF4;SESN1;YPEL5;SLC39A14;NNMT;CISH;PIK3R1;B4GALT1;SH3KBP1;CDC37L1;CYB5A;ARID5B;BMP1;GRB10;DDR1;NRIP1;CREB3L1;SYBU;HLF;AGTR1
GAS7	26	NFATC2;SGMS2;STXBP6;DBN1;UBXN11;DPYS;FAM180B;SCARA5;SLC36A1;DOK2;TPPP3;SPSB4;FGF16;FAM19A5;ANXA4;CALHM2;CYBB;AGAP1;ITPR3;PMP22;ISLR;ANK2;EMP3;WNT9A;LPAR1;CMKLR1
EMILIN3	26	SCN7A;SORCS1;SORCS2;SOX8;RAP1GAP;SOX10;CLDN1;CADM4;NKAIN4;ENTPD2;ITGB8;TMPRSS5;COL9A3;IL34;AATK;SFRP5;GRIK3;FA2H;SLC2A1;ANGPTL7;DRP2;GFRA3;ARHGAP39;FAM101A;MPZ;MAL
NEXN	26	FILIP1L;RRAD;RABGAP1;PRKAG2;ILK;CDYL2;CCDC107;FILIP1;TPM2;FAM46B;JAK2;MBNL2;PACSIN2;MAP1B;RASL11B;SLC38A2;VCL;TCEAL1;MERTK;FRY;CALD1;TAGLN;FBXL3;ARHGAP10;MCU;EDIL3
FAM198B	26	ACVR1C;EPHA4;GLIS1;NEK7;CCDC107;LMCD1;RGS5;MBNL1;ANGPT1;C6;CLUH;NPR3;SLC38A2;TNIP1;PIGU;MOGAT1;PTPN3;CENPV;KCNB1;MAN1A1;RANBP3L;TMEM64;CCDC80;EGFL6;PDK2;ATP1A1
GAS2L1	26	TIMP3;ACVR1C;SH3BP4;AKT3;ELF1;RASAL2;ENOSF1;NHLRC3;NCOA3;DENND2D;MBNL1;B3GALT4;LRRC8A;PAQR4;MMP28;PTPN3;PTPRM;GLTPD1;NCK2;CEPT1;ELK3;PNMT;SIGIRR;MYO5C;NTHL1;CRIP2
ELTD1	26	MORC3;EHD4;MYRIP;ST6GAL1;TSPAN13;CPD;SPARCL1;CD93;KIF17;CMIP;A2M;TM4SF1;CDH5;TCF4;LRRC8C;MYCT1;CYYR1;TSPAN6;GIMAP4;THOC1;COL15A1;APP;ROBO4;ERG;PTPRK;GPIHBP1
SORBS2	26	LGR6;RCAN2;RBPMS2;TBX2;KCNA5;TEK;PREX1;TYROBP;PDE3A;RERGL;GUCY1A3;FHL5;JAG1;PDE5A;MAPRE2;LTBP1;NRGN;MOB2;PRDM16;EPAS1;AMIGO2;PIP5K1B;GUCY1B3;MYOZ1;LRRC10B;HTR1B
SMARCD2	26	AOX1;TUBA8;HDAC7;CUTC;SLC7A6;OLFML3;CYP4B1;FOXO1;BCORL1;BCL9L;WASF3;FSTL1;AHDC1;PIK3R1;TSC22D3;GYS1;GATSL3;SUFU;SNAI2;CLTCL1;ZEB1;NFIC;TENC1;ANPEP;VIT;IL11RA
RPS6KA2	26	FAM213B;MFNG;HDAC7;FAM168A;NUAK1;CPD;KIF26A;CMIP;PAXBP1;GIMAP6;NEURL1B;PLOD1;PEAR1;PNISR;NDUFA4L2;CDH5;IGF2;PDGFB;HOXB7;IGFBP2;MTPN;THOC1;PLA2G4A;FAM43A;NYNRIN;CD93
AQP5	25	KRT77;FXYD3;S100P;CCDC64B;C2orf82;SPINT1;DCD;GJB6;SLC12A2;PIP;ATP6V1B1;C5orf46;HSD11B2;KIAA1324;KRT23;RHOV;PADI2;EPCAM;SERPINB5;COL17A1;SCGB2A2;MUCL1;GRB7;ZNF750;TFAP2C
C1QB	25	CD53;VSIG4;EBI3;CCR1;ARHGAP4;RNASET2;GPR34;SPI1;TYROBP;AIF1;FCGRT;HK3;CYBA;HCK;CPVL;C3AR1;CD163;C1QC;C1QA;FUCA1;C1orf162;CD14;SLCO2B1;SIGLEC1;FOLR2
TBX2	25	RASGRP2;EFHD1;RBPMS2;LGR6;SORBS2;GPRC5C;PHLDA2;CACNA1H;HEYL;LINGO1;PREX1;PEAR1;CARNS1;JAG1;NRGN;FRZB;FOXS1;GPR20;RERGL;NRARP;NOTCH3;TMTC1;GUCY1B3;HES4;LRRC10B
COL5A2	25	CUTC;MYO1B;P4HA2;CNTN3;COL3A1;LOX;LUM;LOXL2;ADAMTS2;MKL1;FSTL1;SPARC;PCOLCE;THY1;COL5A1;ALDH1L2;CCDC80;CALU;UBTD2;COL1A2;ANPEP;COL6A1;COL6A3;COL6A2;PPIC
FBXL15	25	C1orf122;TMEM259;ZNHIT2;EVA1B;C16orf13;FAM173A;NR2F6;ANKRD9;PRR7;IMP3;MRPL34;HOXB2;MFSD3;SCAND1;TMEM160;PPP1R35;PDF;COMTD1;ZNF865;TRAPPC5;YDJC;C4orf48;HES4;CCDC85B;ZNF428
RNASE1	25	STAB1;IL10RA;LYVE1;VSIG4;CD4;ALOX5AP;LGI2;F13A1;MARCO;P2RY14;CSF1R;PRSS36;CD200R1;ADORA3;RNASE6;KCNQ1;MPPED2;C1QC;C1QA;SIGLEC1;RGL1;CFP;MAF;CD163;FOLR2
GPD1	25	TUSC5;PCK1;DCXR;S100B;PPP1R1A;LGALS12;PPP1R1B;PDE3B;PC;GYG2;PLIN1;KCNIP2;G0S2;LIPE;MRAP;HRASLS5;LPL;RBP4;GPT;MARC1;PLA2G16;PFKFB1;ALDH2;PTPRF;AGPAT2
CYFIP2	25	FILIP1L;SYTL2;PRKAA2;MYL9;ASB2;ACTG2;ARHGEF9;SGCA;HSD17B6;MRVI1;PDLIM7;HSPB3;PDLIM3;SMTN;RAB23;CFL2;CNN1;WFDC2;RAB9B;FAXC;EDIL3;TCEAL1;PALLD;PRUNE2;CSRP1
CD52	25	ACP5;ST14;MFSD12;SLC29A3;FBP1;TREM2;DNASE2B;ALCAM;CHIT1;FGR;PLA2G7;ITGB2;RAC2;IL1RN;ACSS3;IFI30;KCNAB2;CTSZ;DCSTAMP;AQP9;FAIM3;RPS6KA1;SLAMF9;MATK;CD300LB
FAM180B	25	TIMP2;DCLK1;PCOLCE2;DBN1;DCN;FAM180A;MRC2;RPL28;SCARA5;FNDC1;DPP4;IL17D;LTBP4;LTBP2;IGFBP6;PDGFRL;WSCD2;ZDHHC7;OMD;CILP;ANGPTL5;GAS1;ABCC1;GAS7;PAK3
ACP5	25	CD52;NRSN2;FBP1;TREM2;IQGAP2;MSR1;DNASE2B;TYROBP;CCDC88A;CHIT1;PLA2G7;IGSF6;LIPA;TFEC;IFI30;DCSTAMP;GRN;SLC15A3;CAPG;NPL;PLD3;TREML1;MYO9B;C1R;MPP1
SOX13	25	TGFB1;PHF15;GPRIN3;RCSD1;LIFR;EPS8;ELF1;ARHGAP6;NCOA3;ZBTB16;DENND3;TMEM204;ARHGDIB;PACSIN2;LRRC8A;SLC38A2;TSC22D3;COX4I2;KAT6A;HYAL2;HVCN1;ANPEP;MEF2D;NTHL1;CTTNBP2NL
PCOLCE2	25	CD70;CCDC109B;NOVA1;ITGA11;PAM;SPSB4;FAM180B;ADAMTSL4;PAMR1;THBS3;FGF16;PROCR;LTBP4;MTSS1L;UAP1;WSCD2;FBN1;ABI3BP;SEMA3C;GALNT13;SFRP4;C1QTNF3;ANGPTL5;GAS1;GFPT2
LTBP2	25	RECK;TIMP2;MFGE8;ZFHX4;ITGA11;DBN1;FBLN2;FBLN5;DCN;FAM180B;ASPN;FNDC1;PLXDC2;LAMA2;ELN;ISM1;MXRA8;COL16A1;OMD;DKK2;USP53;CILP;ANGPTL5;MGP;SPOCK1
IGFBP2	25	MYH9;REM1;MATN3;LPPR4;RCSD1;CDYL2;SPRY4;A2M;PLOD1;PEAR1;ARHGDIB;PHC2;NDUFA4L2;IGF2;PDGFB;COL18A1;MYO1B;IGFBP7;COL4A1;SPARCL1;CLTCL1;RPS6KA2;NCK2;CD93;PTPRG
FERMT3	25	CD53;NCKAP1L;CCR1;STXBP2;HCST;PIK3AP1;SPI1;TYROBP;CARD9;PTPN6;PIK3R5;PLCB2;ITGB2;RAC2;IFI30;LCP1;SASH3;IRF5;RBM47;VAMP8;ARHGAP30;WDFY4;NRROS;SLAMF8;PTPRO
RECK	25	CD70;ZFHX4;NOVA1;ECM1;CLSTN1;FBLN5;FAM180A;MRC2;NT5E;PAM;DPP4;LTBP2;FBN1;PCDHGC3;COL16A1;LAMC1;ZEB1;ISLR;SRRM2;RBPMS;CILP;ANGPTL5;SPOCK1;COL12A1;ASAP3
MYO7A	25	TNFSF13;STAB1;LYVE1;NCF4;DOCK2;ALOX5AP;LGI2;F13A1;MARCO;CSF1R;PRSS36;HCLS1;AP1B1;ALOX5;WAS;CD163;C1QC;SIGLEC1;CD14;SCN1B;ITGAM;FAM105A;SLCO2B1;AIF1;FOLR2
TFEC	25	ACP5;NCKAP1L;NCF2;GLA;C12orf5;CD37;LAPTM5;FBP1;PIK3AP1;MSR1;KYNU;TYROBP;CCDC88A;MPP1;GPR183;FGR;PIK3R5;APOBR;PARVG;PLCB2;C1orf228;NPL;WDFY4;MYO9B;PTPRO
RPS6KA1	25	CD52;ST14;STXBP2;CD300LB;FBP1;HCST;NCEH1;TYROBP;ALCAM;FGR;APOBR;MNDA;LIPA;ITGB2;RAC2;IFI30;AQP9;DCSTAMP;LCP1;SASH3;FAIM3;COL5A1;SLAMF9;MATK;CCR5
COL9A3	25	B4GALNT4;SCN7A;LGR6;DOCK5;PMP2;L1CAM;PLP1;SOX10;RELN;FOXD3;NKAIN4;ENTPD2;DHH;TMPRSS5;PAQR6;PTPN5;EMILIN3;SFRP5;NRXN3;NRXN1;ANGPTL7;GFRA3;AATK;MAL;CMTM5
HEY2	25	NGF;P2RX1;GABRA4;ITIH3;KCNA5;HEYL;TOB1;GUCY1A3;NTF3;LTBP1;MN1;MRGPRF;FOXS1;FOXL1;WFDC1;PLEKHO1;AKAP6;LRRC4B;MUSTN1;NPNT;RBM24;AMIGO2;HES4;FOXC2;HTR1B
MYRIP	25	ST6GAL1;CPD;SPARCL1;PDE9A;ERG;CLEC14A;SLC25A30;DPYD;TPD52;TIAM1;ARHGDIB;BMX;LNX1;PDIA5;ELTD1;HOXB7;TSPAN7;THOC1;ABCG2;UTRN;PTPRB;MYO5C;FAM117A;CRIM1;PTPRK
CCDC88A	25	ACP5;LAPTM5;ST14;CD300LB;TREM2;SNED1;MSR1;TBC1D8;NCEH1;TFEC;ALCAM;PIK3R5;PPP1R12A;APOBR;SPOCD1;LIPA;WDR1;IFI30;DCSTAMP;SH3BGRL3;TCIRG1;TREML1;MYO9B;PTPRO;FBP1
NNMT	25	PNRC1;SLC7A6;GLUL;DARC;CPSF4;MAP3K8;SLC39A14;IFI16;ZNF385D;GSTA4;ITPKC;CISH;NFIL3;MYCBP2;CENPO;CCDC71L;PLA2G2A;IL1RAP;TMEM2;ARID5B;PLSCR1;GPX3;RUNX1;C1S;BCL6
TMEM47	25	EFHD1;AUTS2;DNAJB5;MYL9;RAB3IL1;GNG12;DNAJB4;MYCBP2;TGFB1I1;MBNL2;C3orf58;PDLIM7;HEATR1;TSPAN2;TCEAL1;SH3BGRL;HSPA13;EDIL3;RNF180;GNAZ;CD2AP;NPNT;PALLD;ESAM;PRDM8
MTPN	25	MYH9;TIMP3;ALG6;LATS2;PAXBP1;ANKRD10;MEF2C;XXYLT1;MID2;KHSRP;FANCL;CDH5;ZFC3H1;HEG1;TMEM123;MGAT2;GLMN;THOC1;RPS6KA2;APP;TRAM1;UTRN;CLK1;GATAD2A;CCDC85A
TFRC	25	CD72;KMO;DOCK3;MMP19;MFSD12;CD300LB;TREM2;ALCAM;GPR183;RGS1;AMPD2;HMG20B;DCHS1;C1orf228;DCSTAMP;C15orf48;GLA;DMXL2;SDS;STX4;GNA13;SLAMF9;AVPI1;MMP7;FBP1
APP	25	DOCK9;SGK223;SPARCL1;ERG;CLEC14A;STK40;MEF2C;SF3A1;CDH5;TCF4;HEG1;TMEM123;LNX1;ZNF362;ELTD1;HOXB7;MTPN;GOLIM4;POLR2A;GLMN;PRR12;ELK3;UTRN;ESAM;CCDC85A
FAXC	25	SYNM;CYFIP2;PRKAG2;NCS1;SHROOM3;ITGB1BP2;ASB2;CPNE6;PYGB;HTR2A;MAPK4;RBM38;HSD17B6;SLC38A1;HSPB3;HOXC13;GATA6;WFDC2;RAB9B;RAB33A;TMEM61;KCNH2;PCP4;PCDH7;METTL24
CCDC81	25	RASSF3;PRKAG2;SHROOM3;TRPC4;P2RX1;TMEM158;RASL11B;ASB2;CPNE6;HTR2A;MAPK4;SYNDIG1;RBM38;HSD17B6;PDLIM7;HSPB3;PPP2R2C;RAB23;CFL2;RAB9B;KCNH2;RBPMS;PCDH7;CSRP1;FLNA
CDKN1B	25	ZBTB18;OTUD1;ANKRD37;LDLRAD4;MXD1;CDC7;NEDD9;SDPR;ITPRIP;H1FX;C8orf4;MEOX2;KLF2;EBF3;NR3C2;MYCT1;MED30;PPP1R35;SERTAD3;DLL4;FRY;SLC41A1;MEF2D;HES1;CLEC14A
HDAC7	25	PDGFRA;AMOTL2;SMAD1;SMAD3;BCL9L;LOX;CCSAP;NDST1;FSTL1;AHDC1;LBH;AGTRAP;NUMBL;MVP;DPYSL2;PCDHGC3;SMARCD2;SUFU;LAMC1;ZEB1;RPS6KA2;NYNRIN;CSF1;GPR176;BCL2
GNA13	25	NFATC4;FCHO2;LAPTM5;MFSD12;LDLRAD4;RNF38;DAB2;CCDC107;CCSAP;GPR183;TFRC;RGS1;CREBRF;KSR1;HMG20B;MYO9B;PHYKPL;UPP1;SDS;STX4;EZR;ANGPTL2;SLAMF9;IFITM10;MMP2
CPA3	24	BATF;SKAP1;HDC;CDK15;MS4A2;DCN;FCER1A;NDST2;CXCL14;PIK3R6;TPSG1;MRGPRX2;CD200R1;RAB37;ENPP3;CTSG;CMA1;RHOH;TRIM63;HPGDS;RGS13;KIT;SLC18A2;SIGLEC6
ZFP36	24	PTGS2;CDKN1A;JUNB;NFKBIZ;SPRY1;MCL1;IER3;MAP3K8;BTG2;GADD45B;JUN;CSRNP1;ETS2;MYC;DUSP1;CCNL1;FOS;SLC25A25;ARL5B;TNFAIP3;CSF3;IL6;RNF122;ATF3
GPAM	24	APBB1IP;ADORA1;ME1;IFNGR2;GNAI1;LGALS12;ADIPOR2;DGAT2;ELOVL5;C19orf80;DUSP4;ABCD2;ZNF438;THRSP;ACACA;LDHB;GYS2;ABHD5;CYP4F22;PRRT4;ACSL1;SREBF1;AGPAT2;LNPEP
ITK	24	RASGRP1;ANO9;SKAP1;TMC8;CD5;CD6;CD7;CD2;MYBL1;TRAT1;ZAP70;CXCR4;DUSP2;SH2D1A;ITGA4;CD69;SH2D2A;CD8A;GZMK;RUNX3;PTPRC;SPOCK2;GPR171;CD3E
MYBL2	24	MKI67;BUB1B;ZWINT;CEP55;PKMYT1;FOXM1;IQGAP3;TPX2;NUSAP1;TYMS;AURKB;CDCA5;PTTG1;ASF1B;TOP2A;CENPM;ANLN;TK1;CCNB2;E2F1;CDK1;NCAPH;CDC45;UBE2T
PLEKHB1	24	B4GALNT4;PMP2;SORCS1;FA2H;FBXO2;PLP1;NCAM1;BCAS1;RAP1GAP;SOX10;MT3;RBM11;PRIMA1;MBP;ART3;FOXD3;PAQR6;NRXN3;SOX8;NRXN1;COBL;MPZ;MAL;CMTM5
MYH11	24	TMOD1;RASL12;ACTG2;DES;MYOCD;EDNRA;CASQ2;PDE3A;SGCA;ST5;PPP1R12A;SLC26A10;PDLIM3;KCNAB1;RAMP1;COL4A5;CNN1;LMOD1;MUSTN1;NPNT;RBM24;PRUNE2;SPEG;ARHGEF25
LYPD3	24	VSNL1;CCDC64B;KRT5;S100A14;SPINT1;TFAP2A;GJB2;GJB6;PLCH2;ESRP1;LAD1;PVRL4;TACSTD2;KRT23;RHOV;DSP;FAM84A;SERPINB5;RAB25;RHCG;SDC1;CALML5;SFN;ZNF750
TM7SF2	24	DMRT2;ACVR1C;CEPT1;MGLL;CD248;PPP1R1A;RORC;PDE3B;PC;SLC27A2;APMAP;ACSS3;MMP28;NAT8L;CIDEA;HADH;PLA2G16;ORMDL3;CCND1;ALDH1L1;GLYCTK;ALDH2;TTC36;PFKFB3
PTPRF	24	TUSC5;MYH14;RASL10B;DCXR;GPD1;ATP9A;TMEM132C;GYG2;ACVR1C;PNPLA2;AQPEP;PC;PLIN1;APMAP;HOOK2;MRAP;LPL;RBP4;GPT;NAT8L;PLA2G16;GPT2;ALDH2;GABRE
EMP3	24	ECM1;SGMS2;TTC7A;STXBP6;DBN1;PLP2;S100A10;FMNL1;PPL;TPPP3;CAPN2;S100A4;DNMBP;FGF16;ANXA4;CALHM2;TRIM47;LMNA;LRP4;SH3BGRL3;ISLR;SLC17A7;STARD9;GAS7
CD48	24	KLRB1;MYO1G;CD37;CD300LF;CCR5;IKZF1;SNX20;CXCR4;TRAF3IP3;LIMD2;NUP210;RAC2;PRKCB;LY9;GAPT;DENND1C;PTPN7;C19orf38;IL2RG;C11orf21;PTPRC;CYTIP;TBC1D10C;CD3E
C1orf162	24	CD53;NCKAP1L;NCF2;DOCK2;VSIG4;PARM1;MSR1;RNASE6;CD86;THEMIS2;HCLS1;ADORA3;GLIPR1;MFSD1;CYBA;SH3BGRL;SLA;TAGLN;LST1;VAMP8;C1QB;AIF1;SASH3;EBI3
IFNGR2	24	ANKRD53;EGFLAM;EPB41L4B;TSPAN15;PHLDA3;GNAI1;GPAM;ARHGEF6;MAP3K5;NOD1;RGS3;PNPLA7;HEMK1;MGAT3;EDEM2;PDE8A;ABHD5;KIAA1239;DDR1;C5orf30;MAOB;CRLS1;PLAGL1;ARHGEF26
CCNB2	24	MKI67;BUB1B;PLK1;CEP55;PKMYT1;FOXM1;MYBL2;KIF2C;IQGAP3;TPX2;NUSAP1;CDCA3;AURKB;PTTG1;TOP2A;CENPM;NUF2;CENPF;ANLN;TK1;CCNB1;H2AFX;KIF23;CDK1
TREML1	24	ACP5;ASPHD1;DOCK3;ST14;MFSD12;SLC29A3;CD300LB;TREM2;MSR1;NCEH1;CCDC88A;TNNI2;APOBR;SPOCD1;LIPA;CTSD;AQP9;DCSTAMP;SLC15A3;IL1RN;SLAMF9;ALCAM;IFITM10;MATK
PDGFB	24	PLOD1;PEAR1;CPD;SPRED2;ERG;PAXBP1;CHD1;TPD52;MYH9;ADAMTS9;GNG11;TMEM204;NUAK1;EDN1;CDH5;CCNL1;LRRC8A;HOXB7;IGFBP2;SEZ6L2;RPS6KA2;FAM43A;ROBO4;CRIM1
PRKG1	24	RASL12;RASSF3;MYOCD;TEAD3;MYL9;LPHN3;RYR2;TPM2;ADRA2C;REEP1;DBNDD2;MRVI1;NTF3;TCEAL1;SH3BGRL;CALD1;TAGLN;LRRC4B;MUSTN1;NPNT;CSRP1;FLNA;LMOD1;EDIL3
PIK3R5	24	CD53;NCKAP1L;IL10RA;DOCK2;LAPTM5;STXBP2;ZC3H12D;MSR1;ADAP1;SPI1;TYROBP;CCDC88A;CCDC88B;FGR;DOK2;PYCARD;PARVG;PLCB2;TFEC;KCNAB2;FERMT3;SASH3;IRF5;ANGPTL1
GPSM3	24	CD53;MYO1F;STXBP2;RIN3;IKZF1;FYB;TLR8;C19orf38;ARHGDIB;HCLS1;LYN;TBXAS1;SASH3;WAS;SLA;LST1;FAM78A;RGS18;RGS19;ARHGAP30;PTPRC;SNX20;EBI3;ARHGAP9
OMD	24	RPLP2;RASSF5;CYP4B1;PDGFRL;DBN1;FBLN2;GSN;DCN;FAM180B;ARHGEF1;SLIT2;CST3;LTBP2;TP53I3;RASSF4;IGFBP6;TSPAN8;MAN1A1;CILP;ANGPTL5;MGP;VIT;GAS1;ABCC1
CMIP	24	EHD4;CD93;SPNS2;MFAP3;AFAP1;DUSP23;FURIN;PLVAP;GPR146;THSD7A;TMEM255B;MKL2;ZNF385D;GPR68;ADM5;DOC2B;ELTD1;CYYR1;TACR1;RPS6KA2;CFI;RELL1;TESC;ERG
WNK1	24	ERC1;TACC1;LIFR;GRASP;NCOR2;PREX2;SLC9A3R2;ESYT1;ETS1;TCF4;HEG1;NINJ2;RAMP2;DLL1;HEY1;MED13L;HYAL2;DDR1;MEF2C;ADRB2;ZNF423;HECW2;ABI3;BAIAP2
EFHD1	24	RASGRP2;TGFB1;LGI4;TIMP3;EPHA3;TBX2;PARM1;HEYL;GRK5;ARHGDIB;GPRC5C;FHL5;FRZB;KCNAB1;SH3BGRL;TAGLN;TRNP1;INPP5A;NTN4;ESAM;GUCY1B3;TMEM47;LMOD1;CRIP2
TCF4	24	DOCK9;RAPGEF2;TSPAN13;ATP9A;PDE2A;MEOX2;MAML3;TMCC3;ETS1;MAGI1;FGF12;CDH5;LRRC8C;WNK1;ELTD1;ATRN;DACH1;PPP1R18;FRMD3;BMP6;TP53I11;APP;CD2AP;KIAA1217
MPP7	24	ITGA8;TMOD1;DOCK3;NCS1;MYOCD;P2RX1;IGSF9B;ITIH3;CASQ2;RYR2;CAP2;MAPK4;REEP1;HSD17B6;RIMS3;SLC38A1;WNK2;CAMK2G;SLC8A1;GATA6;AKAP6;RAB9B;ETV6;GRIK5
LST1	24	NCKAP1L;FCN1;CD37;STXBP2;SH3BP1;ARHGAP30;SPI1;CARD9;MNDA;PYCARD;LYN;MYD88;PLCB2;PRKCB;CYBB;PPM1D;HCK;SASH3;VAMP8;GPSM3;C1orf162;PTPRC;SNX20;AIF1
PXN	24	PPAP2B;CUTC;METRNL;PDGFRL;MOSPD1;DBN1;SAMD4A;FBLN2;PAM;IL1R1;FSTL1;PI16;PIP4K2C;DCLK1;FBN1;CORO2B;SMAD3;FGFR1;DKK1;CILP;GPR133;SH3PXD2B;GFPT2;COL6A6
GLTPD1	24	RASSF7;ZMAT1;SLC25A30;RNF38;ENOSF1;GAS2L1;CCDC88C;S1PR4;TMEM204;DYRK1B;LUC7L3;LRRC8C;ZNF362;SCAND1;RPUSD1;TMEM102;HID1;NCK2;AVPR2;C17orf59;STARD3;DEDD2;CCDC85A;SLC25A27
CXCL14	24	AOX1;PTGFR;PPAP2B;OLFML3;CD4;F13A1;LHFPL2;SELENBP1;CPA3;NTRK2;CLIP2;RFTN1;SCN4B;SPOCD1;LAMA1;CTSG;NPY2R;AR;MMP27;CFD;CMA1;ITM2A;VIT;MGAT4B
PDGFRL	24	MYOC;RGMA;DCN;PODN;FAM180B;SCARA5;FGF18;GLT8D2;GPR133;PI16;PXN;VIT;UAP1;MRC2;IGFBP6;SFRP4;OMD;DKK2;CILP;ANGPTL5;WNT9A;GFPT2;PROCR;ABCA8
FAM107A	24	NPDC1;IFI27;CYP4B1;ELF1;LIFR;SRGN;MCTP1;S1PR1;RGS5;ARHGDIB;SLCO4A1;KLF9;EPAS1;TPO;PLAT;TSPAN7;CENPV;FRMD3;KCTD12;TACC1;ITM2A;TMTC1;CTTNBP2NL;CRIP2
APOBR	24	NCF2;C12orf5;LAPTM5;CD300LB;DNASE2B;NCEH1;CCDC88A;FGR;WDFY4;TNNI2;TFEC;C1orf228;IFI30;AQP9;DCSTAMP;TNFRSF11A;GRN;SLC15A3;LCP1;KCNAB2;RPS6KA1;TREML1;MATK;FBP1
WNT9A	24	NFATC2;TTC7A;PDGFRL;UST;TRPC4;FAM180A;RARG;FGF18;FGF16;MAP1A;FAM19A5;PIEZO2;UAP1;IGFBP6;C11orf89;WSCD2;GALNT12;SFRP4;LRP4;WNT2;ARSI;RADIL;GFPT2;GAS7
SGK223	24	FAM168A;GPR56;SDPR;DSC2;HSPA12B;SCN4A;CDH5;ZFC3H1;KDR;DAGLA;LNX1;TSPAN6;TNN;ABHD6;AIF1L;APP;ROBO4;GNAZ;CA4;TRAM1;ZBTB46;CTNNBIP1;TM4SF18;CCDC85A
GATA6	24	MYOCD;C11orf96;ITIH3;PHYHIP;FAT3;CASQ2;MPP7;ADRA2C;LDOC1;REEP1;HSD17B6;SLC38A1;RASL11B;PDLIM3;KCNQ4;RAMP1;DTNA;WFDC2;SELM;RAB9B;FAXC;RNF180;NPNT;WIPF3
BCAS1	23	B4GALNT4;PMP2;B4GALNT3;SORCS1;SOX8;PLP1;RAP1GAP;DRP2;TAC1;PLEKHB1;AURKB;CLDN1;CADM4;NKAIN4;MBP;FOXD3;PAQR6;SFRP5;FA2H;MT3;AATK;FAM101A;MPZ
ZNF750	23	KRT77;VSNL1;CCDC64B;CLCA2;S100A14;SPTBN2;LYPD3;TFAP2A;TFAP2C;GJB6;ESRP1;LAD1;PVRL4;AQP5;KRT23;RHOV;FAM84A;SERPINB5;COL17A1;RAB25;SDC1;CALML5;SFN
THRSP	23	APBB1IP;ADORA1;OLFM2;ME1;LGALS12;GPAM;DGAT1;DGAT2;SREBF1;C19orf80;DUSP4;ABCD2;PYGL;MID1IP1;ACACA;KLHL31;ACSS2;RBP4;CYP4F22;PRRT4;FAM166B;ELOVL5;ACLY
WNT2	23	CD70;ECM1;DACT2;WNT10B;THBS3;FSTL1;TPPP3;PI16;FGF16;CDS1;TRIO;FBN1;C11orf89;PENK;WSCD2;GALNT12;PLEKHG4;SFRP4;C1QTNF3;ARSI;WNT9A;COL1A1;GFPT2
CDCA5	23	MKI67;BUB1B;ZWINT;CEP55;PKMYT1;FOXM1;MYBL2;KIF2C;IQGAP3;TPX2;NUSAP1;ASF1B;TOP2A;CENPM;NUF2;CENPF;ANLN;TK1;CCNB1;E2F1;TYMS;CDC45;TCF19
ZBTB16	23	ERRFI1;RPGR;LIFR;FIBIN;SMAP2;SDPR;KLF15;SOX13;MAP3K6;DENND3;ITPKC;KLF9;ZMYND8;LONRF1;SH3RF1;FAM214A;TSC22D3;PER1;FRY;MED13L;TACC1;TENC1;FBXO31
ITGA8	23	SYNM;TMOD1;RASL12;ACTG2;DES;TMEM252;MYOCD;DAB1;LDOC1;ASB2;TMEM35;MPP7;SGCA;REEP1;CSDC2;KCNAB1;RAMP1;COL4A6;COL4A5;CNN1;TCEAL1;RBM24;NXPH3
S100A14	23	FXYD3;CCDC64B;KRT5;CLCA2;LYPD3;GJB2;GJB6;ESRP1;LAD1;PVRL4;SPINK5;S100A2;LY6D;RHOV;DSP;CRNN;SERPINB5;RAB25;RHCG;CALML5;SFN;CNFN;ZNF750
RAB25	23	VSNL1;CCDC64B;PKP3;S100A14;FXYD3;SPINT1;LYPD3;TFAP2A;GJB2;GJB6;ESRP2;ESRP1;LAD1;PVRL4;TACSTD2;KRT23;RHOV;DSP;FAM84A;EPCAM;SERPINB5;CALML5;ZNF750
CCDC85B	23	EVA1B;C16orf13;FAM173A;SOX18;CEBPA;NR2F6;PRR7;FBXL15;MAP1LC3A;SDF2L1;HOXB2;CCR10;CLEC11A;SCAND1;TMEM160;PPP1R35;CYBA;LRP3;COMTD1;ZNF865;TRAPPC5;YDJC;ZNF428
SPNS2	23	NPDC1;OLFM1;EHD4;DARC;DUSP23;CMIP;LHX6;BAIAP2L1;SULF2;ETS2;PIK3R3;FAM110D;ICAM1;ADM5;EPHB4;CYYR1;SH2B2;IL33;PAFAH1B3;CFI;LRRC32;C10orf128;GPR68
GSN	23	TIMP3;SCG5;PIGT;CYP4B1;TTC7A;FBLN2;SPTBN1;CLEC3B;FMNL1;CST3;CITED1;MBNL3;IL17D;RHOBTB2;MAN1A1;CAB39L;OMD;EIF4G1;CILP;ITM2A;EMP1;IGFBP6;CFD
PLP1	23	SCN7A;PMP2;L1CAM;BCAS1;GAP43;SOX10;MT3;PLEKHB1;PRIMA1;CADM4;MBP;FAM19A5;COL9A3;FOXD3;SFRP5;SLC25A48;NRXN1;ANGPTL7;GFRA3;AATK;MPZ;MAL;CMTM5
LGR6	23	RBPMS2;TBX2;SORBS2;GPRC5C;ENTPD2;TOB1;SOX10;CACNA1A;CARNS1;CLDN1;RERGL;TMEM51;HSPB3;ZBTB7C;COL9A3;GPR20;PRDM16;BRSK2;KCNH2;PIP5K1B;AK5;GFRA3;LRRC10B
ETS2	23	CSF2RB;UGCG;HIPK3;SPRY1;SPNS2;DARC;DUSP23;TMEM173;MAP3K8;ADAMTS1;FAM110D;SLCO4A1;RAMP3;FES;THBD;SBNO2;ABI3;OLFM1;CSF3;IL6;ZFP36;STC1;RNF122
EPB41L4B	23	ANKRD53;MYH14;RASL10B;CAT;IFNGR2;TMEM132C;CAV1;PPP1R1A;ACVR1C;DENND2D;PTGER3;ABHD5;LIPE;C7orf41;PLIN1;HSDL2;CIDEA;PLA2G16;ORMDL3;DDR1;GPX3;KLHDC8B;GABRE
GPR34	23	STAB1;VSIG4;CSF1R;SELPLG;P2RY13;DOK2;ITGAM;KCNQ1;CYBB;CRYBB1;EVI2A;IRF5;PARP16;C3AR1;CD163;C1QC;C1QB;C1QA;ARHGAP30;CD14;NRROS;SLCO2B1;FOLR2
FOSL2	23	CDKN1A;JUNB;CSRNP1;SRGN;SPRY1;GRASP;MAP3K8;ITPRIP;BTG2;SIK1;GADD45B;NAP1L5;SOX17;HBEGF;NFIL3;B4GALT1;SH3RF1;NR4A2;ADAMTS1;USP36;ARID5B;TNFAIP3;RNF122
TRAF3IP3	23	MYO1G;TMC8;CCR2;CD2;IKZF1;RAB37;PTPRCAP;DEF6;SEMA4D;ZAP70;LIMD2;CD48;ITGB7;CD27;LTB;DENND1C;GZMA;CD3D;C11orf21;RLTPR;PTPRC;TBC1D10C;LCK
TRAT1	23	RASGRP1;ANO9;SH2D1A;ITGA4;CD5;CD6;CD2;MYBL1;ZAP70;CXCR4;DUSP2;SKAP1;CD69;CD3E;SH2D2A;CD8A;ITK;GZMM;GZMK;RUNX3;SPOCK2;CD3D;LCK
ZNF385D	23	NUDCD1;HIPK3;DARC;DUSP23;MCTP1;TLL1;CMIP;TMEM255B;MKL2;TIAM1;ITPKC;ADM5;SLCO4A1;ABCD4;IL4R;SNTG2;TACR1;SBNO2;CNN3;CFI;PLSCR1;RELL1;NNMT
ZRANB2	23	ZDHHC17;PNISR;FUBP1;ZMAT1;SLC25A36;EED;C10orf137;DDX17;NAA25;RBM14;ZNF512;CEP95;ZFC3H1;LUC7L3;PTPRN2;SLC25A27;MTERFD3;PREPL;OGT;DMTF1;CTNNBIP1;TUB;C5orf54
FADS3	23	ITGA7;CORO1C;TNFRSF12A;CAV1;LOXL2;CCDC107;RGL1;MSC;GBE1;DLGAP4;PRKAB2;RTN4;KCNQ3;GPC1;PLCD1;UCHL1;UPP1;ORMDL3;RUSC2;GNG2;IL17RE;TMEM43;ABCC3
FBLN5	23	RECK;OLFML3;CELF2;FBLN2;FIBIN;DCN;ADAMTS3;ZNF438;LAMA2;ELN;LTBP2;ISM1;PID1;GPC3;CORO2B;LAMC1;USP53;FBXL7;ITM2A;SPOCK1;VIT;C1S;PARD3B
PREX1	23	EFNB2;TMEM88;SLC6A6;CCDC68;TBX2;ARHGAP4;SORBS2;TEK;SLC9A3R2;TMCC3;JAG2;FGF12;FCN3;KCTD12;CDH24;SLCO2A1;LDB2;RAMP3;HEY1;EPAS1;AIF1L;RASGRF2;MCC
GZMK	23	KLRB1;ANO9;SH2D1A;CD5;CD6;RASGRP1;CD2;MS4A1;TRAT1;FAM46C;SAMD3;LIMD2;DUSP2;CD27;LY9;CD69;CD8A;GZMA;ITK;GZMM;LCK;RUNX3;CD3E
RCAN2	23	PTK2;RRAD;SLC7A2;SORBS2;PARM1;LPHN3;TMEM38B;FHL5;RERGL;PACSIN2;FMO3;FRZB;RBPMS2;KCNAB1;FOXL1;MOB2;JAG1;ARHGEF25;MUSTN1;NOTCH3;GUCY1B3;MAPRE2;LMOD1
WNK2	23	SYNM;DIRAS1;DES;NCS1;SHROOM3;KCNH2;ASB2;ASPG;NCALD;TMEM35;MPP7;PYGB;MAPK4;SLC8A1;LNP1;PDLIM3;REEP1;WFDC2;JPH2;RAB9B;TMEM61;ETV6;PFKFB2
CRLS1	23	ETFA;DMRT2;ACVR1C;IFNGR2;PHLDB2;MAOB;MAP3K5;PJA1;CIDEA;EPB41L1;PGM1;GART;HSDL2;ABHD5;HADH;PLA2G16;ANG;ORMDL3;DNAH9;IRS2;NEDD4L;UTRN;BZW2
VCL	23	MACF1;ILK;ZYX;CAV1;MYH9;DNAJB5;FHL3;YWHAH;NEXN;DMPK;TGFB1I1;DAPK3;PLS3;PDLIM7;PRKAB2;WDR1;VASP;CALD1;PALLD;CSRP1;MCU;STK38L;PICALM
TMEM132C	23	MDFI;DTX1;ACVR1C;EPB41L4B;PEX19;ATP9A;PPP1R1B;RASL10B;DENND2D;FNDC4;PDE3B;PNPLA2;CIDEA;C6;APMAP;LIPE;RAC3;SCRN2;HPD;HADH;PLA2G16;PTPRF;GABRE
ALOX5	23	CLEC10A;STAB1;ALOX5AP;ARHGAP4;F13A1;PSTPIP1;IL1R2;SERPINA1;SELPLG;S100A9;NOD2;HCLS1;FGD3;ASGR2;DCSTAMP;GPC4;PLB1;WAS;CD163;FAM26F;FAM105A;MYO7A;AIF1
KLRB1	23	CD1C;SKAP1;CD5;CD6;CD2;IKZF1;ANO9;ZAP70;CXCR4;LIMD2;NKG7;SH2D1A;CD48;LTB;DENND1C;GZMA;IL2RG;GZMM;C11orf21;GZMK;RUNX3;PTPRC;CD3E
MKL2	23	NPDC1;HIPK3;ERG;LIFR;RAPGEF3;DARC;FAM13C;DUSP23;MCTP1;CMIP;THSD7A;ZNF385D;FAM110D;ADM5;TGFBR2;IFITM1;CYYR1;GIMAP8;TSPAN7;GIMAP4;GIPC2;TACR1;FAT4
FXYD3	23	KRT77;S100P;CCDC64B;FBXO2;C2orf82;KRT5;S100A14;RAP1GAP;TFAP2A;GJB6;ESRP1;SCNN1A;PIP;CLDN1;S100A2;AQP5;KRT23;RHOV;EPCAM;RAB25;SCGB2A2;FA2H;CALML5
KCTD12	23	CLEC14A;LIFR;CCDC85A;PLVAP;TEK;PREX1;TMCC3;PYCARD;PTPRB;ITGB2;EPAS1;FLI1;CYYR1;LDB2;CYBA;TSPAN7;GIPC2;FRMD3;BMP6;KL;FAM107A;ZNF423;CTTNBP2NL
DOK3	23	NCF2;NCKAP1L;NCF4;MYO1F;VSIG4;CCR1;STXBP2;ARHGAP9;ARHGAP4;SPI1;PLEK;CYTH4;S100A9;MNDA;LYN;HK3;CSF3R;HCK;WAS;SASH3;ARHGAP30;TLR8;AIF1
CTTNBP2NL	23	TIMP3;LATS2;LDLRAD4;ELF1;RASAL2;NEDD9;PPM1D;S1PR1;SOX13;TMCC3;RGS5;CDH5;PRKCH;LRRC8A;LRRC8C;MFSD6;KCTD12;HYAL2;FAM107A;UTRN;LRCH1;CCDC85A;CRIP2
NR3C2	23	IGIP;CDKN1B;DCAF15;LUC7L;MEOX2;TEK;PPT1;DSC2;LYN;XPR1;KDR;LNX1;CYYR1;EBF3;DACH1;GIPC2;FRMD3;NRG2;MCC;MEF2C;TM4SF18;FAM117A;CCDC85A
DENND3	23	STIM1;CUTC;RPGR;CLMN;ARHGAP6;RASAL2;NCOA3;ZBTB16;MPP3;SOX13;SLCO4A1;PACSIN2;DDIT4;LRCH2;LONRF1;SH3RF1;TSC22D3;GATSL3;ARRDC2;FRY;PPP1CB;ARHGAP10;KAT6A
C20orf24	23	MDFI;ACVR1C;GLA;SLC7A4;C12orf5;GLRX2;ASAH1;C6orf106;SPR;KHSRP;CAP2;MTCH2;PGP;CUL7;C6;PRMT7;HSPB8;NLE1;TEX261;HPD;ISOC2;ORMDL3;PALLD
SMAD3	23	AOX1;HDAC7;CCDC51;SNED1;SPTBN1;DCN;KAZN;TWIST2;PXN;MEDAG;SNX33;NUMBL;CBLB;SNX21;EFNA5;REV3L;MMP27;LRP1;FAM65C;ACKR3;GPR133;GFPT2;PRRX2
ASPH	23	EPHX1;AOC2;ANKRD53;ZNF219;ECM2;MGST1;ME1;NEK7;SNCG;FMNL2;CUTC;PYGL;LDHB;SLC38A2;TNIP1;UCHL1;DHCR24;PCDH9;TP53I11;RARRES2;BTD;ELOVL5;KIAA1239
TNIP1	23	FAM198B;CUTC;NFKBIA;BIRC3;CAV1;FMNL2;PDE1B;ASPH;C19orf80;SCN4A;MBNL1;ANGPT1;HSPB7;NPR3;MCM6;KIAA0040;CENPV;NOL3;ABHD5;PCDH9;SDC3;PDK2;PARD3B
PTPRK	23	MYRIP;SPARCL1;SH3BP4;KIF17;CLEC14A;RASAL2;MCTP1;ADAMTSL4;DPYD;MECOM;LSR;ARHGDIB;CDH5;ELTD1;EFNA1;HOXB7;GIMAP4;GIPC2;TJP1;ELK3;ERG;FBXO31;CCDC85A
CNN1	22	ITGA8;MYH11;RASL12;ACTG2;CYFIP2;DES;JPH2;MYOCD;ITIH3;ASB2;TPM2;DNAJB5;PPP1R12A;MRVI1;PDLIM7;PDLIM3;SGCA;NPNT;RBM24;PRUNE2;CSRP1;SPEG
OAS2	22	IFIH1;IFI27;DDX60;MX2;MX1;UBE2L6;RTP4;IFIT5;IFIT2;OAS1;STAT1;CMPK2;IFI44L;ISG15;MYD88;SAMD9;LY6E;PARP9;HERC6;SAMD9L;EPSTI1;TYMP
CDKN1A	22	BAG3;UGCG;JUNB;SPRY1;SRSF7;BTG2;CEBPD;GADD45B;CSRNP1;SOX17;FOSL2;MYC;NFIL3;USP36;ARL5B;CSF3;IL6;ZFP36;STC1;ZBTB21;RNF122;CH25H
SPEG	22	MYH11;TGM2;SGCA;EDNRA;ITIH3;CACNA1H;C12orf75;CASQ2;SULF1;NTRK3;PTP4A3;SLC26A10;CSDC2;RAMP1;COL4A5;PRDM16;CNN1;MUSTN1;GRIK5;NPNT;RBM24;ARHGEF25
GZMA	22	KLRB1;MYO1G;LCK;CD2;NKG7;PTPRCAP;ZAP70;SAMD3;TRAF3IP3;LIMD2;KLRF1;CST7;GNLY;TBC1D10C;LTB;IL2RB;CX3CR1;GZMM;RARRES3;GZMK;CD3D;CD3E
CD8A	22	RASGRP1;SH2D1A;TMC8;CD5;CD7;CD2;TRAT1;FAM46C;CERKL;CXCR4;CST7;DUSP2;ITGA4;CD69;SH2D2A;ITK;GZMM;GZMK;RUNX3;PTPRC;CD3D;CD3E
AGPAT2	22	TUSC5;GPD1;OPLAH;PLIN1;LGALS12;GPAM;PNPLA2;DGAT2;C14orf180;PC;LDHD;GYG2;HOOK2;ACSS2;MRAP;LPL;RBP4;GPT;MARC1;PFKFB1;ACSL1;NMB
MYCT1	22	RASSF9;TM4SF1;EMCN;CDKN1B;SPARCL1;KIF17;CLEC14A;MEOX2;NEDD9;MECOM;ZBTB18;DAPK3;LRRC8C;DGCR8;HOXD1;ELTD1;TSPAN7;DACH1;GIMAP5;FRY;HLX;STK38L
COL5A1	22	FKBP10;P4HA2;COL3A1;LOX;LOXL1;MRC2;ADAMTS2;FSTL1;SPARC;LYN;COL5A2;CORO2B;COL16A1;RPS6KA1;ALDH1L2;CALU;COL1A2;ANPEP;COL1A1;COL6A1;COL6A3;COL6A2
ESYT1	22	ANKRD53;EGFLAM;CDKN1C;TSPAN15;SIDT2;MYL6;SRPX;CD248;PHLDA3;YPEL5;LOXL4;ADAMTSL4;GLDN;RGS3;HEMK1;IGF1;WNK1;SYNE2;DDR1;ELOVL1;MAOB;CES4A
LGALS12	22	PCK1;ADORA1;GPD1;GPAM;DGAT1;DGAT2;PDE3B;PC;LDHD;THRSP;APMAP;HRASLS5;GYS2;GPT;C14orf180;DBI;GPT2;PRRT4;ACSL1;SREBF1;AGPAT2;HEPACAM
IQGAP3	22	MKI67;BUB1B;PLK1;ZWINT;CEP55;PKMYT1;FOXM1;PRC1;MYBL2;KIF2C;TPX2;NUSAP1;AURKB;CDCA5;PTTG1;TOP2A;CENPM;ANLN;TK1;CCNA2;CCNB2;CDC45
MYL6	22	CNST;PPAP2A;PRKAG2;ILK;SIDT2;SNED1;PRKCDBP;CD248;MYL9;YPEL5;AP2S1;CALM1;ESYT1;PYGM;PPP1R14A;ANXA6;MAP7D1;YIF1A;TAGLN;ELOVL1;CSRP1;PICALM
ALOX5AP	22	STAB1;LYVE1;VSIG4;ARHGAP4;PSTPIP1;P2RY14;SELPLG;CD200R1;RNASE1;ALOX5;KCNQ1;CYBB;IGSF21;PARP16;C3AR1;CD163;C1QC;C1QA;SCN1B;ITGAM;FAM105A;MYO7A
CPNE6	22	DIRAS1;CKB;BCHE;LGI1;TMEM158;TMEM35;PYGB;MAPK4;SYNDIG1;PI15;HSPB3;METTL24;PPP2R2C;CFL2;RAB9B;FAXC;TMEM61;KCNH2;CCDC81;PCDH7;FAT3;PRKACB
NOTCH3	22	PTK2;REM1;RCAN2;SLC7A2;ANO1;TBX2;SEPT8;EPS8;A2M;LINGO1;PEAR1;NR2F2;ARHGDIB;FHL5;LBH;NDUFA4L2;LZTS1;COX4I2;TRNP1;NCK2;UTRN;GUCY1B3
ELOVL5	22	SAT1;ANKRD53;CLMN;DHCR7;OLFM2;ME1;GPAM;FMNL2;ASPH;C19orf80;GBE1;ABCD2;THRSP;NUDT8;ACSS2;MVD;INSIG1;FADS2;NOL3;FAM166B;ACLY;HES6
TOP2A	22	MKI67;BUB1B;PLK1;ZWINT;CEP55;PKMYT1;FOXM1;MYBL2;IQGAP3;TPX2;NUSAP1;CDCA3;AURKB;CDCA5;PTTG1;ASF1B;NUF2;CENPF;ANLN;TK1;CCNB2;TYMS
HCLS1	22	CD4;RCSD1;ZC3H12D;IL1R2;SMAP2;ANKMY2;TRPM2;TBXAS1;RNASE6;ALOX5;GPSM3;HMHA1;WAS;SLA;CD163;RIN3;EBI3;C1orf162;SLCO2B1;MYO7A;AIF1;FOLR2
PDLIM3	22	MYH11;SYNM;TMOD1;FILIP1L;CYFIP2;DES;CAP2;ASB2;ACTG2;SGCA;REEP1;DBNDD2;WNK2;RAB9B;GATA6;HMCN2;WFDC2;RAB23;CNN1;PRUNE2;CSRP1;MYOCD
TGFB1I1	22	ITGA1;MSRB1;ILK;ZYX;DNAJB5;PFKP;FHL3;B4GALT5;PDLIM7;WDR1;VCL;SLC45A1;TSPAN2;SMTN;IQCJ-SCHIP1;VASP;CALD1;HS1BP3;EDIL3;PALLD;CSRP1;TMEM47
RNASE6	22	NCF2;IL10RA;NCF4;DOCK2;AMICA1;RNASET2;IQGAP2;TYROBP;CCDC88B;GPR183;CSF1R;CD86;HCLS1;RNASE1;TBXAS1;MERTK;EVI2A;C3AR1;CD163;C1QA;C1orf162;P2RY14
CDC42EP3	22	SPRY1;ANKRD37;CLEC14A;CYR61;SERPINE1;DGCR8;S1PR1;ZBTB18;KLF6;EDN1;DDIT4;NEDD9;PLEKHM2;MTFP1;DLL4;APOLD1;ABCG1;BACE2;GALNT12;TNFAIP3;TMTC2;AGFG2
AVPR2	22	ERF;CLEC14A;RASAL2;LSR;JAG2;DUSP7;LYL1;CARD10;HID1;FAM69B;MMP28;PRKAR1B;GATA2;GLTPD1;TJP1;CCM2L;ABI3;CCND3;ELK3;PPP1R13B;NTHL1;CCDC85A
RAMP1	22	ITGA8;MYH11;TGM2;CD34;NCS1;JPH2;MYOCD;LDOC1;CSDC2;CASQ2;TPM2;SGCA;REEP1;NTF3;KCNAB1;GATA6;AKAP6;RBPMS;NPNT;WIPF3;SPEG;MYOZ1
MFSD12	22	CD52;ASPHD1;KMO;DOCK3;TREM2;F13A1;OPN3;OXER1;CHIT1;PLA2G7;TFRC;SPOCD1;GNA13;LIPA;DNASE2B;DCSTAMP;SDS;TREML1;MYO9B;SLAMF9;IFITM10;MATK
SPARC	22	PCED1B;HSPG2;MYO1B;COL3A1;LOX;LOXL2;MPP3;PLOD1;OAS1;IGF2;LRRC8A;COL5A2;COL5A1;DDO;COL4A2;COL4A1;UCP2;CCDC80;CD93;CTGF;PRSS23;PPIC
TMCC3	22	EPB41L4A-AS2;TSPAN13;CLEC14A;SRGN;MEOX2;PPM1D;ITPRIP;PREX1;S1PR1;PML;TCF4;MFSD6;SDPR;SIK1;ABHD6;APOLD1;HEY1;KCTD12;SNRK;KL;MEF2C;CTTNBP2NL
COL16A1	22	RECK;TIMP2;MFAP4;ADAM33;TTC7A;SAMD4A;LTBP3;ITGBL1;FAM180A;MRC2;FGF14;IL17D;ELN;LTBP2;SSC5D;COL6A1;COL5A1;MXRA8;ISLR;CILP;GAS1;CTHRC1
EGFLAM	22	DDR1;SLC1A3;SIDT2;GLUL;IFNGR2;CDC37L1;ESYT1;BRPF3;CISH;NHS;RGS3;HEMK1;CENPO;MATN2;ATP10A;ABHD5;ADCY3;C1QTNF1;BBS10;MMD;PLAGL1;ARHGEF26
PER1	22	BCL2L1;ERRFI1;SPRY2;FOXO1;GRASP;NR1D1;SIK1;ZBTB16;KLF15;JUN;IRF2BP2;KLF6;KLF2;KLHDC10;FEM1C;KLF9;DDIT4;SH3RF1;TSC22D3;ITPRIP;DUSP1;RLF
FKBP10	22	PDGFRB;PDGFRA;NFATC4;ST14;FGD1;RCN3;PYCR1;MSR1;MRC2;CCSAP;FGR;PCOLCE;THY1;NLGN2;COL1A1;IFI30;COL5A1;LCP1;SFRP2;COL1A2;FAT4;CKAP4
MYH9	22	FXYD5;PDGFB;LATS2;PAXBP1;NES;NEDD9;MECOM;INPP4B;ARHGDIB;CDH5;PLS3;LRRC8C;VCL;IGFBP2;MTPN;DACH1;DAPK3;CD93;ESAM;FLNB;CRIM1;PICALM
PLCB2	22	NCKAP1L;DOCK2;MYO1F;STXBP2;ARHGAP9;ARHGAP4;SPI1;DEF6;CCDC88B;CARD9;PTPN6;PIK3R5;TFEC;HK3;FERMT3;SASH3;IRF5;LST1;FAM78A;ARHGAP30;ITGAM;BTK
PARD3B	22	AOX1;CUTC;MACF1;LRRC16A;RASSF4;TENM1;EPHB6;FBLN5;CLEC3B;APBB2;HDDC3;MBNL1;ANGPT1;NPR3;ELN;CYP4B1;TNIP1;CYP4X1;MAN1A1;PCDH9;CCND1;FBXL7
SLC38A2	22	KCTD3;FAM198B;HIPK3;BAD;ELF1;RAB8B;SOX13;ASPH;MKL1;NEXN;MBNL1;TSC22D3;MAP1B;RASL11A;TLDC2;TIPARP;ARRDC2;MAN1A1;RANBP3L;BMP2;ATP6V0A1;ARHGAP10
PPAP2B	22	FAM188B;DCLK1;GLUL;FBLN2;BIN1;NCOR2;DCN;PODN;PXN;PIK3R1;GEM;NINJ2;PRKCE;GAS1;CORO2B;CXCL14;FGFR1;CILP;MGAT4B;PID1;AGTR1;BCL6
FAM110D	22	NPDC1;HIPK3;ERF;SPNS2;SH2D3C;DARC;DUSP23;GPR146;MKL2;ETS2;ITPKC;ADM5;MYC;B4GALT5;RALGDS;RHOU;CYYR1;SH2B2;GPR68;RELL1;C10orf128;BCL3
ORMDL3	22	AOC2;TM7SF2;ACVR1C;CPEB4;EPB41L4B;CORO1C;PMM1;CAV1;ZBTB38;SLC27A2;APMAP;C20orf24;TEX261;PTPN3;FADS3;NAT8L;ABHD5;PCDH9;PFKFB3;IRS2;CRLS1;KIAA1239
HMG20B	22	C9orf16;AUTS2;CD72;ZFHX4;RASSF3;ROGDI;RAB3IL1;CALM1;TPM2;DNAJB5;MICAL1;TFRC;DOCK3;GNA13;EFNA5;TCEAL1;ETV6;MYO9B;SLAMF9;CSN1S1;IFITM10;DEDD2
ELN	22	TIMP3;OLFML3;SAMD4A;FBLN2;LOX;CD248;FBLN5;LOXL2;CLEC3B;GRK5;FSTL1;PI16;VASN;LTBP2;COL16A1;CAB39L;PISD;EIF4G1;PARD3B;EMP1;CTHRC1;TMEM43
TLR8	22	CD53;CCR2;NLRC4;FYB;SERPINA1;SPI1;SELPLG;DOK3;MNDA;TBXAS1;ASGR2;CYBA;HCK;WAS;C19orf38;C1QC;RGS18;AIF1;ARHGAP30;SLAMF8;SNX20;GPSM3
KIF26A	22	FAM213B;MFNG;NOTCH1;PODXL;RAPGEF2;SH2D3C;FURIN;NEURL1B;FAM129B;CDH5;PRKCH;EPHB4;CARD10;CYYR1;PRKAR1B;SH3BP4;RPS6KA2;FAM43A;CD93;SYT7;EGFL7;ZBTB46
MAP1B	22	ELF1;ARHGAP6;LAMB2;LOX;SPTBN1;CAV1;NCOA3;CLEC3B;NEXN;S100A4;ANGPT4;SLITRK4;SLC38A2;MBNL1;CYP4X1;UCHL1;PCDH9;RANBP3L;PPP1CB;CCDC80;PON2;ANPEP
DNAJB5	22	RASL12;ILK;RBM24;ZYX;LBR;NPTN;MPP2;TPM2;TGFB1I1;HMG20B;DBNDD2;PDLIM7;SRF;WDR1;VCL;TSPAN2;SH3BGRL;VASP;CNN1;PIP5K1C;PALLD;TMEM47
PCDHGC3	22	PDGFRB;TIMP2;HDAC7;RECK;ZFHX4;OLFML3;CD34;N4BP2L1;TTC7A;DBN1;FBLN2;DCN;ZNF385B;FSTL1;CALHM2;FBN1;ITPR3;LAMC1;ZEB1;ZNF521;C9orf72;NFIX
LIMD2	22	KLRB1;TMC8;CD2;DEF6;CNTROB;STARD9;ZAP70;TRAF3IP3;NUP210;CD48;CD3E;LTB;AOAH;GZMA;IL2RG;GZMM;C11orf21;GZMK;AGPAT4;SNX20;TBC1D10C;LCK
CD2AP	22	TGFB1;SSFA2;KIF17;RNF38;RAB3IL1;DCK;CALM1;TPD52;TM4SF1;GNG11;FGF12;CDH5;TCF4;ARHGEF12;ESAM;LRRC8C;TRAM1;ELK3;MEF2A;WDFY1;TM4SF18;TMEM47
BMP2	22	TIMP3;CYP4B1;LATS2;FOXO1;ELF1;ARHGAP6;NCOA3;SDPR;CLEC3B;INPP4B;DNAJB4;MBNL1;MBNL2;KLF9;SLC38A2;UBALD1;CHST7;TACC1;FBXL3;ANGPTL1;EMP1;HOXA9
LRCH1	22	DOCK9;ST6GAL1;SPARCL1;LDLRAD4;SLC25A30;RASAL2;SDPR;FBXO31;PRKCH;LRRC8C;LNX1;KCNAB2;MTUS1;SLC39A11;ARRDC2;FRY;ABCG2;PICALM;SYBU;MYO5C;CTTNBP2NL;LIFR
CAV1	22	AOC2;ANTXR2;EPB41L4B;ITGA5;CORO1C;PLP2;MAML2;MPP3;GBE1;MAP1B;IGF1;LRRC8A;VCL;MCM6;GPR64;TNIP1;FADS3;ORMDL3;COL5A3;FAT1;ANPEP;ABCA8
MNDA	22	NCF2;NCKAP1L;IGSF6;CCR1;NLRC4;MSR1;KYNU;TYROBP;SASH3;DOK3;MYD88;RAC2;IFI30;AQP9;SPI1;LCP1;PLEK;C19orf38;RPS6KA1;LST1;C19orf59;TLR8
ZFHX4	22	RECK;KIFAP3;OLFML3;RUNX1T1;TTC7A;LTA4H;FSTL1;DCN;PRICKLE1;CACNB4;HMG20B;ACVR2A;LTBP2;NHSL1;PCDHGC3;EBF3;ZEB1;FGFR1;LRP6;DKK2;CILP;PTPRD
SCGB2A2	21	KRT77;AQP5;KIAA1324;FXYD3;RHOV;KRT23;TFAP2C;MUCL1;CALML5;GJB6;CCDC64B;ESRP1;C2orf82;KRT7;GRB7;EPCAM;PIP;ATP6V1B1;C5orf46;DCD;COL17A1
APOLD1	21	SPRY2;ITPRIP;BTG2;EPB41L4A-AS2;SIK1;CDC42EP3;S1PR1;CSRNP1;CCRL2;DLL1;INHBB;MTFP1;TSPAN6;TMCC3;TSC22D1;SRGN;PELI1;SPRY1;SOX17;DUSP1;CLDN5
NRXN1	21	B4GALNT4;SCN7A;PMP2;ENTPD2;PCSK2;SORCS1;L1CAM;NRXN3;COL9A3;FOXD3;PLEKHB1;SOX10;PRIMA1;RELN;GFRA3;CLDN1;PLP1;CADM4;MPZ;MAL;CMTM5
MMP2	21	MMP14;SPON2;CTSK;ANTXR1;TIMP2;PRRG3;ITGA11;FAP;THBS2;PLXDC2;CRYM;ANK2;FAM102A;STON2;FAM180A;CTHRC1;MXRA8;GNA13;DPP4;SOGA2;ANGPTL2
CTSK	21	MMP14;SPON2;FAM102A;FRAS1;HSD17B14;MEGF6;FAP;THBS2;MMP2;CTHRC1;CRYM;SLC43A3;AEBP1;GOLM1;HCST;PRKG2;SH3PXD2B;ANTXR1;FRMD6;DPP4;SOGA2
LUC7L3	21	NHLRC3;VAMP1;ZNF248;FUBP1;EED;PLEKHF2;ZRANB2;OGT;POLG2;DMTF1;BTAF1;FNBP4;ARGLU1;SRSF11;PNISR;ZNF512;DCUN1D4;ATAT1;ZFC3H1;GLTPD1;DDX17
NUSAP1	21	CCNB2;TPX2;ANLN;CCNA2;CDCA5;MKI67;PLK1;ZWINT;NUF2;SPAG5;CEP55;CENPM;TYMS;H2AFX;FOXM1;TK1;PTTG1;IQGAP3;MYBL2;ASF1B;TOP2A
LCK	21	TRAT1;ANO9;ITGB7;CD27;SH2D1A;TMC8;RLTPR;CD3D;LTB;CD6;DENND1C;ZAP70;CD2;GZMM;TRAF3IP3;LIMD2;RASAL3;GZMK;TBC1D10C;CD3E;GZMA
PPP2R2C	21	GREM2;FAT3;NCKAP1L;SIAH2;TMEM61;KCNH2;VPS13A;CCDC81;NOS1AP;CPNE6;MYH10;CHRDL2;SHROOM3;HTR2A;TRPC4;GABRA4;ITIH1;TRIM54;WFDC2;SYNDIG1;HSPB3
ADRB2	21	B3GNT5;AIF1L;SIK1;EXT1;MGAT1;KALRN;SNRK;WNK1;KLF11;GNAZ;CCRL2;TSPAN6;DLL1;CASKIN2;PDK4;TRABD2A;SCN4A;NOSTRIN;SNX33;SNAI1;GNAI1
PDK4	21	RERE;B3GNT5;KLF11;ACADVL;GJA5;TXNIP;PDE1B;FABP4;PTGER2;MRPL46;CNTNAP1;SNAI2;ADRB2;SREBF1;C19orf80;ZNF697;SCN4A;GNAZ;SNX33;GYS1;ABHD5
ISLR	21	MAP1A;PLEKHG4;RECK;OLFML1;NOVA1;SCARA5;NT5E;ECM1;DKK1;FAM180A;ANK2;FGF14;IGFBP6;ADAM33;EMP3;GFPT2;COL16A1;FBN1;EPS8L2;GAS7;ITGBL1
PSMB8	21	C19orf66;HLA-DPB1;IFIH1;GIMAP7;PARP9;STAT1;PSMB10;RFX5;SECTM1;EPSTI1;RARRES3;UBE2L6;B2M;IFITM1;PSMB9;GIMAP4;NLRC5;PSME1;IL18BP;HAPLN3;NMI
GRASP	21	FOSL2;GATSL3;WNK1;RASIP1;ADAMTS1;NR4A2;HYAL2;PLK2;CSRNP1;C8orf4;SOX17;DLL1;PER1;PIK3R3;KLF2;ABI3;FOXO1;SIK1;THBD;CASKIN2;RNF122
AKAP6	21	CSDC2;CDK18;MYOZ1;IGSF9B;RAMP1;LTBP1;DOCK3;RYR2;MPP7;NCS1;PLEKHO1;REEP1;NTF3;MYOCD;TPM2;P2RX1;ITIH3;KCNA5;HEY2;DGKG;HTR1B
HSPA12B	21	PODXL;AIF1L;PCGF2;HEG1;SGK223;CCM2L;HYAL2;PKN3;CBFA2T3;ITGA6;RAMP2;PCDH12;ELK3;TEK;LSR;KANK3;ESAM;SLC9A3R2;EFNB1;CLIC5;ADAM15
RAC2	21	CD52;RPS6KA1;ITGB2;CD48;PIK3R6;NUP210;CD37;FERMT3;PTPN6;WDFY4;PTPN7;PIK3AP1;HCST;LCP1;MNDA;PTPRC;HPGDS;KCNAB2;IKZF1;SASH3;MATK
MUSTN1	21	CACNA1H;MYH11;NTF3;RASL12;DTX3;HEY2;DBNDD2;RCAN2;MRGPRF;CSDC2;NPNT;COL4A5;PRKG1;LPHN3;C11orf96;EDNRA;SPEG;ITIH3;ARHGEF25;ITIH4;LMOD1
SEMA3C	21	ANXA1;ADAMTS5;MMP27;GALNT12;GALNT13;CCDC109B;GFPT2;CDS1;PCOLCE2;UAP1;PAM;FBN1;ITGA11;TTC7A;S100A10;TRIP10;DBN1;EPS8L2;SNX21;DNMBP;FGF16
ZBTB46	21	AIF1L;EFNB1;LRRC8A;SGK223;EPHB4;FMNL3;ZNF692;KIF26A;NES;TCF15;GPR56;ESAM;NOVA2;SCN4A;SH2D3C;DUSP7;TSPAN9;CDH5;ELFN1;KDR;PPP1R13B
CCR1	21	NPL;NCF2;MYD88;ARHGAP30;FERMT3;RBM47;C1QC;C1QB;IFI30;PTPRO;CYBB;DOK3;CD14;SPI1;NRROS;NAGA;MNDA;HCK;CD180;PLEK;PIK3AP1
CADM4	21	B4GALNT4;PMP2;EMILIN3;ENTPD2;GAS2L3;SOX10;ITGB8;SORCS1;FA2H;NRXN1;RTKN;FBXO2;ARHGAP39;SLC2A1;GFRA3;L1CAM;PLP1;MPZ;MAL;SOX8;BCAS1
IGSF6	21	DNASE2B;NPL;NCEH1;CD22;PLA2G7;ALCAM;TREM2;ACP5;IFI30;C11orf45;CTSD;NPC2;SLC29A3;FBP1;NCAPH;MNDA;SLC15A3;LCP1;CD180;PLEK;MATK
EPAS1	21	EFNB2;KCTD12;NPDC1;PREX1;CDH24;ARHGAP4;RAMP3;TCN2;FAM107A;SRGN;TEK;ARL15;LIFR;TMTC1;CYYR1;LDB2;STEAP3;SORBS2;SELP;PARM1;TSPAN7
AP1B1	21	DOK2;MEF2C;PTPN18;CCNA2;TBXAS1;MFSD1;PPT1;NAGA;C1QC;KCNQ1;CD4;AIF1;SDPR;CRYBB1;GFRA2;PYCARD;FCGRT;MYO7A;FUCA1;PARM1;SLCO2B1
CAMK2G	21	ASB2;MRC2;NCKAP1L;RASL11B;ETV6;KCNQ4;RYR2;MPP7;TPM2;FAM46B;USP35;JPH2;SETD1B;PIP4K2C;P2RX1;ITIH3;RIMS3;TESK2;RASSF3;HSD17B6;RASL12
IFITM1	21	CD74;IFI44L;LY6E;CFI;PLSCR1;HLA-DRA;ADM5;ODF3B;ILK;MKL2;SECTM1;UBE2L6;SERPING1;NGFR;PSMB9;PSMB8;FAM13C;SULF2;SEMA4B;GIMAP7;IL18BP
PKMYT1	21	MKI67;CCNB2;TPX2;CEP55;CDCA5;CENPF;CDK1;ZWINT;NUF2;ANLN;MYBL2;CENPM;TYMS;E2F1;KIF2C;TK1;CDC45;PTTG1;IQGAP3;ASF1B;TOP2A
SLA	21	IL1R2;CD53;SMAP2;SAMSN1;DOCK2;CD163;GPR183;RIN3;GPSM3;C1orf162;HCLS1;THEMIS2;ARHGAP9;MERTK;SLCO2B1;SRGN;HCK;SASH3;IRAK3;WAS;EBI3
DOCK9	21	PODXL;RASAL2;LRRC8A;PRKCH;TUSC3;RPGR;APP;TSPAN13;CDH5;PDE2A;MAP2;MTUS1;LRCH1;MAGI1;TACC1;MYO5C;CALM1;TCF4;MXD4;ST6GALNAC3;PTPRB
UGCG	21	CCL2;CCNL1;SBNO2;RALGDS;RGS16;PIM1;CCDC71L;CDKN1A;HIF1A;CSF3;ETS2;IL6;CDK2;NFIL3;DARC;RELB;GRAMD1A;IER3;TMEM2;BCL3;ARL5B
ARHGAP10	21	HSPB7;RANBP3L;PPP1CB;SLC38A2;CUTC;FMNL2;SH3RF1;RRAD;CLMN;MKL1;DENND3;UNC119B;PALLD;NEXN;MBNL1;CMTR2;ARHGAP6;ANGPT1;SLCO4A1;TLDC2;PACSIN2
ABCD2	21	GPAM;EHBP1;APBB1IP;KLHL31;DGAT1;DCXR;FAM166B;ACSL1;CDO1;SLC16A7;SREBF1;SPHK2;HRSP12;ARHGAP20;C19orf80;THRSP;GYS2;ELOVL5;IZUMO4;SLC7A6;AR
DBNDD2	21	TSPAN2;NCKAP1L;NPTN;RASL12;PDLIM3;MUSTN1;MAMDC2;ITGA5;MRGPRF;NPNT;SH3BGRL;TCEAL1;PDLIM7;PRKG1;DNAJB5;REEP1;CSRP1;PLEKHO1;LMOD1;DGKG;PPP1R12A
RYR2	21	LPHN3;NPNT;AKAP6;RAB9B;REEP1;CASQ2;ACTC1;KCNQ4;CAMK2G;MPP7;SGCA;ADRA2C;JPH2;P2RX1;PRKG1;MYOCD;GNAO1;ITIH1;ITIH3;WFDC2;HSD17B6
CASQ2	21	CSDC2;MYH11;TGM2;NTF3;RASL12;RAMP1;RYR2;MPP7;NCS1;CAP2;ASB2;REEP1;GUCY1A3;PCP4L1;MYOCD;MAPK4;SPEG;GATA6;RBM24;ITIH3;LDOC1
MMP27	21	DCN;SLITRK4;ALPK2;ANGPTL5;NOVA1;UAP1;LMX1A;SEMA3C;SMAD3;CILP;TENM1;ELANE;GPR133;HTRA3;FBN1;ADA;TRIP10;DBN1;DKK1;CXCL14;RGMA
LOX	21	DCN;AOX1;LOXL2;ELN;HDAC7;GRIK5;ZEB1;CCDC80;MAP1B;CTHRC1;COL5A2;SPARC;COL5A1;COL1A2;CORIN;SNAI2;COL3A1;UCP2;FSTL1;WDR66;SNX33
PPP1CB	21	NEK7;LRCH2;CLUH;RANBP3L;EPHB6;GIGYF1;CCDC107;IRF4;DYNC1I1;MAP1B;EZR;DENND3;TCEAL1;TIPARP;HIF1A;ARHGAP10;MBNL1;SH3BGRL;JAK2;PIP4K2A;STARD4
TRPC4	21	SLC20A2;FAT3;SAMD14;PCDH20;HSPB3;TMEM61;KCNH2;GNAO1;CCDC81;MSRB1;PCDH7;PPP2R2C;CHRDL2;TSPAN2;SMTN;HTR2A;WNT9A;TEAD3;WFDC2;HSD17B6;SHROOM3
DUSP23	21	HIPK3;THSD7A;PLCB4;CFI;CPLX1;LCAT;MKL2;TESC;ETS2;DARC;OLFM1;SPNS2;SCN1B;FAM110D;ADM5;CMIP;SH2B2;ZNF385D;SLCO4A1;GPR68;TMTC2
MRVI1	21	CACNA1H;MYOM1;CACNA1C;CNN1;RASL12;ACTG2;RRAD;COL4A5;LMOD1;CD163;ARHGEF9;PRKAA2;FAM46B;TPM2;COL4A6;PALLD;PRKG1;TEAD3;CYFIP2;CALD1;EDIL3
SYNM	21	ASB2;ITGA8;PRKCB;TMOD1;KCNH2;WNK2;TMEM35;LGI3;PRKAA2;JPH2;COL4A6;PYGB;RAB9B;PRUNE2;RAPGEF2;DTNA;REEP1;FAXC;DAB1;PDLIM3;SLC8A1
ADRA2C	21	SELM;WFDC2;RASD2;KCTD15;KCNH2;SH3BGRL;GNAO1;RASL12;RYR2;RNF180;PLA1A;JPH2;GATA6;P2RX1;PRKG1;RAMP3;CRMP1;ITPR1;TCEAL1;HSD17B6;HAPLN2
WASF3	21	RASSF4;QKI;TUBA8;PIK3R1;CUTC;OLFML3;GAB2;CYP4B1;APBB2;MAP3K5;SERPINA5;FOXO1;RHOBTB2;ZFHX3;ANGPTL1;MBNL1;ELF1;FBLN2;MAN1A1;SMARCD2;RNF19A
NOVA1	21	DCN;RECK;WSCD2;LPAR1;ANXA4;CBLB;SCARA5;ZNF385B;ISLR;DCLK1;NT5E;LTBP4;PCOLCE2;ANK2;STARD9;VIT;TRIP10;MMP27;FBN1;ABCA8;RGMA
ITPRIP	20	NEDD9;SDPR;PELI1;HBEGF;CDKN1B;S1PR1;CYR61;JUN;SPRY1;C8orf4;SOX17;DLL1;PER1;MTFP1;FOSL2;SRGN;SIK1;PDE4B;TMCC3;APOLD1
ACLY	20	MMP17;ADIPOR2;NSDHL;MVD;ADORA1;ACSS2;INSIG1;CLMN;ACACA;THRSP;OLFM2;DLAT;C19orf80;MID1IP1;ME1;ELOVL5;EBP;FADS2;HES6;PRRT4
PTPN6	20	CD53;PLCB2;SPI1;RAC2;IRF5;DOK2;TYROBP;VAMP8;C1QC;ARHGAP30;FERMT3;CPZ;WDFY4;ITGAM;HK3;LCP1;NRROS;NCF2;BTK;LPAR5
JUNB	20	MIDN;SERTAD3;ADAMTS1;BTG2;CEBPD;NR4A2;CDKN1A;FOS;JUN;JUND;CSRNP1;BHLHE40;ZFP36;FOXC1;FOSL2;C11orf96;HES1;DUSP1;GADD45B;ATF3
PNPLA2	20	TUSC5;APMAP;LIPE;DTX1;GPT2;HOOK2;PC;TP53I13;PLA2G16;MRAP;PDE3B;AQPEP;PTPRF;AGPAT2;MESP1;SCRN2;TST;HEBP2;TMEM132C;PLIN1
DLL4	20	EGLN3;NEDD9;BACE2;INPP5D;NAGS;MECOM;CDC42EP3;PDIA5;ENPP2;EFNA1;CLDN5;MLLT4;MFAP3;FBXO31;BHLHE40;CDKN1B;HES1;FRY;AGFG2;ATP13A3
SPRY1	20	GPR3;RNF122;NUDCD1;ITPRIP;BTG2;HBEGF;C9orf40;CDKN1A;S1PR1;ITPKC;C8orf4;LRRC1;ETS2;CDC42EP3;ZFP36;FOSL2;MPZL2;SOX17;APOLD1;SIK1
C3AR1	20	CD53;TBXAS1;IRF5;RBM47;DOCK2;C1QC;CD163;GPR183;CSF1R;C1QB;RNASE6;MFSD1;PIK3AP1;TNFSF8;ITGAM;TYROBP;EVI2A;ALOX5AP;GPR34;IQGAP2
SBNO2	20	UGCG;LMNB1;RALGDS;ELL;ACVR1B;GRAMD1A;ITPKC;RHOU;ZNF385D;ETS2;IFI16;RUNX1;SH2B2;FES;NFIL3;DARC;SEMA4B;SLCO4A1;TMEM173;BCL3
ZYX	20	PDLIM7;SRF;WDR1;FHL3;PIP5K1C;FBXL3;CALM1;VCL;ILK;DNAJB5;LIMS2;CORO1C;GNG12;SNAPC2;TGFB1I1;FLNA;VASP;DAPK3;STK38L;MYL9
CD86	20	CD53;NCF2;ITGB2;IL10RA;GLIPR1;TYROBP;TBXAS1;RNASE6;KYNU;THEMIS2;C1orf162;LAPTM5;CYBA;PARM1;SH3BGRL;MSR1;RNASET2;FUCA1;IQGAP2;CPVL
CSF3R	20	SELL;SERPINA1;AOAH;CMTM2;IL18RAP;PROK2;VNN2;VNN3;SORL1;RGS18;C19orf38;DOK3;STXBP2;NFE2;ARG1;MMP25;S100A12;IL1R2;MXD1;S100A8
PVRL4	20	ESRP1;KRT77;SPINT1;GJB6;RAB25;TFAP2A;GJB2;SH3D21;CALML5;RHOV;CCDC64B;ST14;ASPHD1;LAD1;CELSR1;ZNF750;FAM84A;SERPINB5;S100A14;LYPD3
LDHD	20	LGALS12;ACSL1;GPT2;C20orf27;ECHS1;PCCB;PKD2;ALDH1L1;PCYT2;CYB5A;GYS1;PC;LPL;PFKFB1;GCDH;QDPR;GPT;OPLAH;ACY1;AGPAT2
LAD1	20	SFN;DSP;RAB25;RHCG;KRT23;RHOV;CALML5;GJB6;PLCH2;TFAP2A;ESRP1;PVRL4;ZNF750;EPCAM;SPINK5;S100A2;SERPINB5;S100A14;CCDC64B;LYPD3
ASF1B	20	MKI67;CENPM;TACC3;NUSAP1;E2F1;BUB1B;ZWINT;CEP55;TPX2;PKMYT1;CDK1;ANLN;AURKB;CDCA5;CDC45;TK1;TYMS;MYBL2;TCF19;TOP2A
JAG2	20	ADCY4;NPDC1;HEG1;EPHB4;PREX1;CCM2L;PCDH1;AVPR2;KIAA1671;ARHGAP31;ABI3;LSR;PPP1R13B;SLC9A3R2;PIK3R3;CLIC5;CASKIN2;HYAL2;ELFN1;ADAM15
ANGPT1	20	TRNP1;PCDH9;RRAGD;FAM198B;EPHB6;PARD3B;CUTC;FRZB;GRK5;LRRN3;APBB2;NPY1R;NPR3;NTRK2;ARHGAP10;ZNF703;TNIP1;ARHGAP6;MAN1A1;RANBP3L
ATP9A	20	C2CD2;G0S2;MGST1;LRRC8C;LNX1;FNDC4;TACC1;ZMAT1;CCDC68;FBXL7;TUSC5;PTPRF;C7orf41;PNPLA7;ANGPTL1;SORBS1;ST6GALNAC6;TCF4;TMEM132C;HSD11B1
TK1	20	MKI67;CCNB2;CENPM;MYBL2;NUSAP1;BUB1B;PLK1;ZWINT;NUF2;CEP55;PKMYT1;TYMS;FOXM1;KIF2C;CDCA5;PRC1;IQGAP3;UBE2T;ASF1B;TOP2A
FRMD3	20	KCTD12;XPR1;AFAP1L2;NCK2;NR3C2;REM1;FBXL3;ENG;HOXB7;CYYR1;FAM107A;ARHGDIB;TSPAN7;CCDC85A;ZNF512;EBF3;GIPC2;TCF4;TUBE1;EBF2
PPL	20	STAT6;SLITRK2;EMP3;SH3BGRL3;CALHM2;S1PR2;ITPR3;NT5E;ECM1;FAM180A;MAP1A;NAV2;SPOCK1;TTC7A;DBN1;PCNXL2;VASN;EPS8L2;S100A6;CAPN2
BUB1B	20	CCNB2;TPX2;ANLN;E2F1;MKI67;PLK1;ZWINT;CEP55;TK1;UBE2T;FOXM1;ASF1B;AURKB;CDCA5;CDC45;PTTG1;MYBL2;TOP2A;KIF2C;IQGAP3
TFAP2A	20	RAB25;RHOV;ETV4;SH3D21;KRT23;GJB2;FXYD3;FA2H;DSP;GJB6;CCDC64B;PVRL4;ESRP1;LAD1;CALML5;LYPD3;ZNF750;CLDN1;SERPINB5;COL17A1
ITGB8	20	B4GALNT4;FAM102A;EMILIN3;RAP1GAP;GAP43;IL34;SOX10;SORCS1;SORCS2;FA2H;FOXD3;ANGPTL7;SOX8;GAS2L3;CLDN1;C2orf88;COBL;ARHGAP39;CADM4;ETV4
LMNA	20	ANXA1;EFHD2;NFATC2;DIAPH1;SH3BGRL3;C14orf80;SPTAN1;EMP1;TPPP3;RFX2;VIM;WDR34;MAP7D1;PLEC;EMP3;TTC7A;S100A10;PHLDB1;S100A6;TMEM43
PCDH7	20	GREM2;FAT3;FAXC;HSPB3;TMEM61;CKB;SYNDIG1;RASSF3;KCNH2;MSRB1;CPNE6;MYH10;SHROOM3;INHBA;HTR2A;TRPC4;WIPF3;TMEM158;CCDC81;HSD17B6
ODC1	20	SLC16A9;XPO1;PREPL;AP4B1;ISOC2;HSD17B8;ZNF385C;HMGB2;ZMAT1;FAM160A2;SLC2A4RG;STX10;STARD9;MBD3;PGP;PPDPF;S100A4;WFS1;EIF2S1;MKNK2
KIAA1239	20	YPEL5;ANKRD53;AOC2;ORMDL3;GNAI1;GPR64;PDE1B;ASPH;ARHGEF26;MAP3K5;MCM6;SLC27A2;NAALAD2;IFNGR2;DAAM1;PTPN3;ABHD5;PMM1;AGPAT9;P2RX6
CLEC10A	20	SLPI;FCER1A;IL10RA;LYVE1;RGL1;CD14;ALOX5;CSF1R;SELPLG;AIF1;CYBB;ASGR2;PLTP;TBC1D14;SLCO2B1;F13A1;STAB1;SIGLEC1;FOLR2;CFP
CA4	20	KAZN;BAALC;SGK223;USP13;KALRN;CCSER1;DSC2;GNAZ;CCRL2;MGAT1;FABP4;CNFN;TSPAN6;TTLL10;ABLIM3;BST2;SCN4A;ADAMTS18;CADM2;ZNF697
GRIK3	20	SCN7A;PMP2;CLDN1;SFRP5;SOX10;SORCS1;FOXD3;SLC2A1;EMILIN3;DRP2;PRIMA1;NGFR;GFRA3;ARHGAP39;AATK;FAM101A;MPZ;MAL;DCLK3;CMTM5
ALDH4A1	20	PLXNB2;BAG3;THAP8;NME3;PISD;EIF4G1;TEX2;KRT79;CYP4B1;MAN1A1;RRAS;DERL1;TK2;GPBAR1;SNCG;TMEM178A;P2RX6;KIFC3;NOL3;NCKAP5L
TMEM204	20	GLTPD1;PDGFB;RASAL2;LRRC8A;GALK1;ST6GAL1;PCDH1;CCND3;SOX13;ELK3;ERF;KIF17;FBXO31;SYBU;MFNG;NDUFA4L2;MXD4;LIFR;CCDC85A;IFNGR1
PC	20	LGALS12;GPT2;TM7SF2;PTPRF;PFKFB1;ACSS2;ALDH1L1;ACSL1;CYB5A;ALDH2;PNPLA2;GPD1;AGPAT2;DCXR;LDHD;MYH14;PYGL;OPLAH;LDHB;PLIN1
CORO2B	20	DCN;MRC2;ANPEP;PPAP2B;DCLK1;OLFML3;EGFR;CD34;FBN1;CILP;COL5A1;PXN;TRIP10;FBLN2;COL6A3;NFIX;DNMBP;ABCC1;FBLN5;FGFR1
ITGA11	20	THBS3;MRC2;CD70;LTBP2;COL8A2;C1QTNF3;ASPN;TNFAIP6;SEMA3C;PCOLCE2;PSD3;ANGPTL5;GALNT13;DBN1;CDS1;ABI3BP;FBN1;MMP2;FNDC1;SPSB4
KIF17	20	COL15A1;WDR54;AGFG2;MAML3;LRRC8C;LNX1;MYCT1;ELTD1;PAQR4;CD2AP;ELK3;HOXB7;TMEM204;PTPRB;TM4SF18;CLEC14A;DUSP7;PTPRK;GPIHBP1;CDH5
CARD9	20	ARHGAP30;NLRC4;SPI1;DEF6;IRF5;WDFY4;DOCK2;VAMP8;STXBP2;PLCB2;SASH3;DOK2;FERMT3;CYBA;WAS;SH3BP1;CYP2S1;ARHGAP4;IKZF1;LST1
C1R	19	FAM198A;MVP;KCND3;LRP1;FAM65C;ACP5;MUC1;SVEP1;SMOC2;PCSK5;PLA2G2A;PCOLCE;SERPING1;MYCBP2;SERPINF2;C1S;ECEL1;BICC1;SNED1
NPR3	19	EPB41L1;LBP;AMOTL2;KAZN;EGFL6;PISD;PDE1B;TMEM139;CHRDL1;FAM198B;THAP8;TNIP1;NOL3;PARD3B;TLE2;STC2;ANGPT1;UCP2;C1orf198
SERPINA1	19	FYB;SELL;FCN1;S100A8;PROK2;MYO1G;ALOX5;ASGR2;RGS18;IL1R2;CCR2;S100A9;NFE2;CSF3R;SELPLG;TLR8;S100A12;C19orf38;CD300E
ACACA	19	CYP4F22;GPAM;ADIPOR2;ADORA1;MMP17;PCYT2;TF;OLFM2;POLD2;KCNE1;ME1;THRSP;INSIG1;MME;ACLY;SREBF1;FAM134B;MID1IP1;PRRT4
ST6GALNAC1	19	TEK;TPST2;RAMP2;PLAT;NPDC1;TPO;RUNDC3B;CDH24;RAMP3;C10orf128;ABCB1;LAMA3;ADAM15;TMTC1;SLC9A3R2;NTHL1;MLPH;ANKRD29;LCN10
PLD3	19	LIPA;ACP5;NCEH1;HEXB;SDS;TYROBP;CTSD;MPP1;TREM2;PSAP;CTSZ;FCHO2;LAPTM5;ST14;FBP1;SLAMF9;TTYH3;GRN;CD9
SREBF1	19	ABCG1;PRRT4;GPAM;ACACA;LGALS12;ADORA1;ACSS2;CNTNAP1;DGAT1;DLAT;C19orf80;MID1IP1;HOOK2;DUSP4;APBB1IP;ABCD2;GYS1;THRSP;PDK4
SOX8	19	RAP1GAP;ITGB8;EMILIN3;ENTPD2;B4GALNT3;SOX10;CLDN1;FA2H;FOXD3;PLEKHB1;FBXO2;C2orf82;ARHGAP39;COBL;AATK;CADM4;MPZ;ETV4;BCAS1
DES	19	ITGA8;MYH11;TMOD1;HSPB3;ACTG2;PDLIM3;WNK2;RSPO3;NTS;ASB2;SGCA;SLC8A1;PRUNE2;CNN1;TMEM35;REEP1;HMCN2;WFDC2;HSD17B6
SH3BGRL3	19	EFHD2;NCEH1;FXYD5;ANXA5;ANXA4;PLP2;CCDC88A;FGF16;S100A6;CTSZ;SPRYD3;PTMS;CAPN2;S100A10;PPL;LMNA;CAPG;CD9;EMP3
BCL3	19	CSF2RB;MIDN;UGCG;PIM3;RGS16;SBNO2;PPFIA3;PPRC1;B4GALT5;RARA;CSF3;IL6;RUNX1;FAM110D;ICAM1;DENND4C;PPP1R18;DACT1;FES
TRAPPC5	19	SCAND1;EVA1B;ROMO1;PPAP2A;EPB41L4A-AS2;COMTD1;ZNF865;PRR7;CSNK1G2;TMEM160;YDJC;CYBA;FBXL15;PRKCDBP;C8orf82;C4orf48;HES4;CCDC85B;ZNF428
GPT2	19	HADH;PLA2G16;PPP1R1B;MYH14;ACVR1C;LGALS12;PFKFB1;PNPLA2;PFKFB3;APMAP;PDE3B;TTC36;PC;PTPRF;LDHD;S100B;ALDH1L1;HEPACAM;PLIN1
FOXM1	19	CCNB2;MKI67;TPX2;ANLN;NUSAP1;CDCA5;BUB1B;PLK1;CENPF;SPAG5;CEP55;UBE2T;CDCA3;TK1;CCNA2;MYBL2;TOP2A;KIF2C;IQGAP3
STAT1	19	PSMB8;SAMD9L;IDO1;PARP9;ETV7;PSMB10;CMPK2;HERC6;RARRES3;EPSTI1;UBE2L6;CXCL11;RTP4;OAS2;ISG15;PSMB9;DDX60;BATF2;IFIT2
FNDC1	19	DCN;MRC2;LTBP2;SFRP4;SSC5D;FNDC5;ASPN;DKK2;NHSL1;FAM180B;ANGPTL5;ITGA11;C1QTNF3;PIEZO2;GAS1;HMCN1;FBN1;WSCD2;SPSB4
SFN	19	TRIM29;RHCG;KRT23;TFAP2C;RHOV;CALML5;GJB6;CCDC64B;ZNF750;LAD1;DSP;KRT5;LYPD3;TACSTD2;PKP3;S100A2;SERPINB5;S100A14;COL17A1
CALD1	19	LPHN3;INPP5A;MRVI1;SYTL2;VCL;EDIL3;TCEAL1;INPP4B;GNG12;TPM2;PALLD;PRKG1;NEXN;ARHGAP32;TGFB1I1;SH3BGRL;MBNL1;LMOD1;TAGLN
FAM19A5	19	PMP22;ADD3;WNT9A;LRP4;PIEZO2;PAMR1;TPM2;PSD3;SHISA6;PRIMA1;CD70;MCOLN3;L1CAM;PLP1;COL6A6;DPP4;WSCD2;GAS7;CDS1
PSMB9	19	CD74;HLA-DPB1;HLA-DRA;ODF3B;STAT1;PSMB10;IL18BP;DDX60;LY6E;IFITM1;EPSTI1;PSME1;UBE2L6;B2M;PSMB8;BST2;GIMAP4;HLA-DMB;HLA-DMA
CACNA1H	19	RASGRP2;INPP5A;MRVI1;RASL12;RRAD;HES4;MUSTN1;RBPMS2;TPM2;FAM46B;JPH2;NPNT;SMARCD3;TRNP1;SH3BGRL;SPEG;LMOD1;PARVG;TBX2
ZFC3H1	19	DDX17;ZNF248;ZNF629;SGK223;ZRANB2;PNISR;LSMEM1;KL;SMCR8;ARGLU1;MTPN;ZNF574;GNRH1;ZNF512;EED;PHLDB2;SGSM3;SEC31B;LUC7L3
B4GALNT4	19	RAP1GAP;PMP2;GFRA3;SOX10;ITGB8;NRXN3;COL9A3;NRXN1;FA2H;PLEKHB1;FBXO2;MAL;FOXD3;SORCS1;COBL;FAM101A;PAQR6;CADM4;BCAS1
EDIL3	19	LPHN3;MRVI1;PDLIM7;NPTN;CYFIP2;ITGA1;C9orf3;TPM2;NPNT;SORT1;PALLD;PRKG1;NEXN;FHL5;SH3BGRL;TGFB1I1;TMEM47;CALD1;TAGLN
PFKFB1	19	AQPEP;MARC1;PDE3B;GPT2;HRSP12;PC;ALDH1L1;ECHDC2;PLA2G6;LDHD;LPL;GYS2;GPD1;AGPAT2;GPT;PLIN1;C14orf180;HEPACAM;S100B
IRF5	19	PLCB2;SPI1;IL10RA;FERMT3;C3AR1;CMKLR1;CSF1R;CARD9;SIGLEC1;DOK2;PRSS36;PIK3R5;MCOLN1;ITGAM;GPR34;CUL7;PLEK;PTPN6;NRROS
SLIT3	19	MFAP4;PDGFRA;ADAMTSL1;NCAM1;NTRK2;PLEKHG4;SSC5D;LRRC17;MASP1;ECM1;FSTL1;GPC3;ANPEP;OLFML1;THY1;COL6A2;LUM;PLEKHO1;ITGBL1
ECM2	19	CILP;CUTC;SELENBP1;RARRES2;CFD;CCDC80;PAM;MASP1;NTRK2;OGN;LGALS3BP;MFAP4;TIPARP;CTSF;ASPH;CHRDL1;CLU;MAN1A1;PIP4K2C
PCDH1	19	PGF;LRRC8A;HEG1;EPHB4;ELK3;IVNS1ABP;HOXB7;PODXL;ARHGAP31;NDST1;TMEM204;ESAM;SH2D3C;JAG2;MFNG;GIMAP6;LINGO1;CDH5;CBX2
DSP	19	CCDC64B;LYPD3;TFAP2A;KRT23;VAV3;RHOV;CALML5;GJB6;SFN;AP1M2;ESRP1;PRKCZ;LAD1;GRB7;TACSTD2;FAM84A;SERPINB5;S100A14;RAB25
PDE3B	19	PPP1R1A;HADH;APMAP;PPP1R1B;HOOK2;TM7SF2;ACVR1C;GPT2;PFKFB1;G0S2;MDFI;AQPEP;PNPLA2;PCK1;GPD1;SCRN2;LGALS12;TMEM132C;PLIN1
FGFR1	19	PODN;TRIO;PPAP2B;ADAMTSL4;ZFHX4;CD248;DCLK1;SLAIN1;FSTL1;FOXO1;AKAP12;PXN;PIK3R1;CORO2B;TMEM102;NFIX;BIN1;NCOR2;RIMS3
EMP1	19	LTBP4;TIMP3;BMP2;EMILIN1;C14orf80;CLEC3B;ELN;CELF2;CYP4B1;DRAM2;IGFBP6;TTC7A;DBN1;THBD;FBLN2;LMNA;SPSB1;TMEM43;GSN
CYP27A1	19	DNASE2B;LIPA;PGBD5;KMO;CTSD;ASPHD1;HEXB;ZMYND15;OXER1;TREM2;PLA2G7;DCSTAMP;GPC4;FBP1;SLAMF9;MAPK13;AQP9;CHIT1;NR1H3
TPPP3	19	THBS3;MAMDC2;TMEM74B;SCARA5;CLEC3B;WNT2;UAP1;LMX1A;NFATC2;FBN1;LMNA;EMP3;S100A10;F10;SPSB4;PI16;GFPT2;GAS7;HTRA3
DENND1C	19	KLRB1;CD48;MYO1G;NUP210;CCDC88B;TRAF3IP3;TMC8;TBC1D10C;CD3E;RUNX3;DEF6;PTPN7;ZAP70;HMHA1;PTPRC;SNX20;IKZF1;LCK;C11orf21
GALNT12	19	EPS8L2;SEMA3C;STK40;ADAMTSL4;IRF4;CDC42EP3;WNT2;SNX9;PAMR1;FGF16;CRYM;FAM180A;WNT9A;CDS1;DBN1;GFPT2;DPP4;ZNF385A;VASH2
PYCARD	19	TGFB1;SPI1;GIPC2;TBXAS1;LST1;KCTD12;TYROBP;FBXL3;ITGB2;KCNAB2;DOK2;PIK3R5;STXBP2;ARHGDIB;PTPRB;ARHGAP4;AP1B1;SASH3;CYBA
RNF180	19	EPM2A;LRRC4B;BTC;GNAO1;PRKACB;P2RX1;NCS1;ADRA2C;SHROOM3;GATA6;GUCY1A3;NCKAP1L;CNTN4;METTL24;SH3BGRL;TMEM47;RIMS3;HSD17B6;MYL9
CALU	19	LOXL1;LAMB2;P4HA2;SLC39A13;PPAN;RABAC1;MACF1;ILK;ITGAV;C11orf24;COL5A2;ADAMTS2;COL5A1;B4GALT2;RRP9;COL6A1;TXNL4A;COL6A2;C12orf23
TNNI2	19	MYOZ1;NCEH1;ASPHD1;ACTA1;SLAMF9;ALCAM;TREM2;CTSD;DCSTAMP;IFITM10;KLHL41;TREML1;CD300LB;MYBPC1;APOBR;MYL1;FGR;MATK;MYLPF
SOX18	18	SNAI1;LYL1;EPHB4;ID3;SMAD6;NOTCH1;EPHA2;IRF2BPL;ELFN1;EGFL7;ELK3;NRARP;SH2D3C;DUSP7;ID1;GATA2;CCDC85B;PPP1R13B
ADAM15	18	ADCY4;EFHD2;NPDC1;HEG1;EPHB4;SEMA3F;TPO;HYAL2;PKN3;RAMP2;HSPA12B;TEK;LCN10;JAG2;ATG9B;THBD;ST6GALNAC1;CRIP2
CD5	18	ANO9;KLRB1;ITK;CXCL9;TRAT1;ITGA4;SH2D2A;GZMK;PLCH2;RUNX3;CD6;RASGRP1;SPOCK2;CD3E;CD8A;CD3D;CST7;DUSP2
CSRNP1	18	MIDN;SERTAD3;SIK1;BTG2;PHLDA1;CDKN1A;JUNB;SOX17;ZFP36;MCL1;ARRDC2;FOSL2;GRASP;ADAMTS1;MYC;DUSP1;APOLD1;KLF9
CIDEA	18	PPP1R1A;HADH;PLA2G16;DNAH1;LIPE;TM7SF2;PLXNB3;ALDH1L1;EPB41L4B;CAT;ZMAT1;FABP4;TMEM132C;CRLS1;ECHDC3;KCNIP2;HSDL2;PLIN1
PARP9	18	IFI44L;IFIH1;MYD88;IRF7;ETV7;STAT1;CMPK2;PARP12;TRIM21;EPSTI1;MX1;UBE2L6;RTP4;OAS2;PSMB8;IFI16;IFIT2;NMI
CMPK2	18	OAS1;IFIH1;STAT1;PARP9;ETV7;BST2;LY6E;EPSTI1;MX1;IFI44L;OAS2;HERC5;HERC6;ISG15;UBE2L6;MYD88;DDX60L;IFIT2
S100A9	18	SELL;SERPINA1;ALOX5;CLEC4G;DOK3;VNN2;HK3;VSIG4;RETN;CD163;ASGR2;C19orf59;HCK;F13A1;S100A12;GCA;AIF1;S100A8
SIGLEC1	18	CLEC10A;RNASE1;MARCO;STAB1;IRF5;NCF4;RGL1;PLEK;VSIG4;C1QC;C1QB;CYBB;FOLR2;MAF;CD200R1;MYO7A;CFP;PRSS36
ME1	18	EPHX1;GPAM;ACACA;SGK2;ADIPOR2;ACSS2;ASPH;TSPAN15;OLFM2;TKT;ELOVL5;MVD;HES6;LNPEP;TF;ACLY;FADS2;THRSP
KRT77	18	AQP5;KIAA1324;FXYD3;MUCL1;HSD11B2;DCD;SCGB2A2;TFCP2L1;CALML5;RHOV;CCDC64B;PVRL4;KRT23;ZNF750;C5orf46;GJB6;SERPINB5;COL17A1
IFIH1	18	SAMD9;LY6E;PARP9;EPSTI1;WARS;HERC6;PARP12;SAMD9L;TRIM21;MX1;RTP4;OAS2;HERC5;CMPK2;PSMB8;IFIT5;DDX60L;IFIT2
N4BP3	18	PGF;WSCD1;KIAA1462;AFAP1L1;FAM43A;NDST1;SMAD1;EFNA1;FAM212A;PCDH12;JUP;LRRC8A;SCNN1B;PKP1;TNFRSF4;CCDC85C;BCL6B;SELP
SFRP4	18	PDGFRL;WSCD2;TPST1;PTHLH;WNT2;ASPN;CCDC80;COL14A1;THBS3;FNDC1;MRC2;COL1A2;WNT9A;C1QTNF3;ABI3BP;PCOLCE2;PENK;PAM
LYL1	18	SOX18;EGFL7;HHEX;GATA2;AVPR2;NOTCH1;RIT1;RGS19;C17orf59;FAM69B;PPP1R13B;SH2D3C;ARMC7;DUSP7;FAM212A;FAM117A;PDE8A;NRROS
CCM2L	18	TMEM88;NPDC1;ABI3;HEG1;EPHB4;HYAL2;AVPR2;CARD10;CYYR1;HSPA12B;ELK3;TEK;LSR;PPP1R13B;SH2D3C;JAG2;GIPC2;C10orf128
COL1A1	18	MAP1A;MRC2;ALPK2;PLEKHG4;FKBP10;WNT2;LRRC15;ECM1;COL5A1;COL1A2;IFI30;C1QTNF3;COL6A1;COL3A1;COL6A3;PYCR1;CKAP4;CREB3L1
CSF3	18	RGS16;IL6;UGCG;RALGDS;PTGS2;CCDC71L;SELE;CDKN1A;TNFAIP6;IER3;ETS2;ZFP36;CSF2RB;FES;ICAM1;CCL2;NFKBIZ;BCL3
EVA1B	18	ZNF444;CSNK1G2;ZNF865;C1orf122;SCARF2;CCR10;NR2F6;TRAPPC5;C16orf13;CLEC11A;SCAND1;TMEM160;FBXL15;FADD;C8orf82;ZNF358;CCDC85B;ZNF428
CASKIN2	18	ADCY4;RNF122;KLF11;CLIC5;RASIP1;TNFAIP1;AIF1L;RAMP2;TCF15;JAG2;ADRB2;PIK3R3;GPR56;SCN4A;GRASP;THBD;SOX17;ELFN1
LINGO1	18	TRNP1;PTK2;CHST15;KCNH2;FRZB;PCDH1;PEAR1;NOTCH3;TBX2;RERGL;FCHSD2;GUCY1B3;NMNAT2;GPR20;LZTS1;AJUBA;GPRC5C;PHLDA2
PLEK	18	DOK2;SPI1;IRF5;DOK3;IGSF6;NCKAP1L;CYTH4;CYBB;CCR1;NRROS;CRYBB1;PRSS36;MNDA;HPGDS;CD180;SIGLEC1;PIK3AP1;BLNK
FAT3	18	RAB9B;HSPB3;KCNH2;ETV6;GNAO1;CKB;CPNE6;PPP2R2C;PCDH7;SHROOM3;ITIH1;HTR2A;TRPC4;METTL24;GATA6;WFDC2;SYNDIG1;HSD17B6
MFNG	18	NEURL1B;PPM1F;RPS6KA2;FAM213B;CHST15;LHX6;ST6GAL1;NOVA2;CARD10;CD93;KIF26A;ELK3;TMEM204;PCDH1;GIMAP8;GIMAP6;TGFBR2;WSCD1
MEF2C	18	IGIP;NR3C2;SCFD2;RRAGC;H1FX;SNRK;WNK1;TMCC3;FXYD5;MTPN;CNNM2;ESAM;DACH1;AP1B1;CYYR1;GLMN;APP;MEOX2
PDE2A	18	TCF4;SDPR;BMP6;NOTCH4;CDH5;TSPAN13;KALRN;USP13;IFI16;DOCK9;PTPRB;ABLIM3;HMGB2;PML;PPP1R16B;SHANK3;SLC1A1;ADHFE1
RASGRP1	18	TRAT1;ANO9;GZMM;SH2D1A;ITGA4;CD6;FAM46C;CD5;SH2D2A;CD7;ZAP70;CD2;ITK;CD8A;GZMK;CD3E;MYBL1;DUSP2
MED13L	18	NCOA2;ZBTB16;CHD6;WNK1;LNX1;APBB2;EBF3;ZZEF1;TTC28;SF3A1;TCF12;ELF1;RUNX1T1;KAT6A;RASAL2;ATXN7;CREBBP;LIFR
GPR68	18	CSF2RB;TLL1;CMIP;CYTL1;RELL1;SULF2;DUSP23;IFI16;SPNS2;SH2B2;TACR1;ADM5;DARC;TMEM255B;C10orf128;ABCD4;HAPLN3;FAM110D
RIMS3	18	SELM;CDK18;LRRC4B;NCS1;DOCK3;KCNQ4;CAMK2G;CD34;RNF180;FBXL7;GRIK5;FOXO1;MAPK4;P2RX1;MPP7;ITIH3;HTR1B;FGFR1
ROBO4	18	PDGFB;CRIM1;FAM43A;SGK223;PNISR;CPD;SMAD1;ELTD1;ERG;SCNN1B;GNRH1;TM4SF18;FAM117A;THOC1;ACAD11;CDH5;GNG11;GPR56
YPEL5	18	KIAA1239;PREX2;ADCY3;ATP10A;DDR1;ESYT1;RAB6B;SIDT2;MYL6;TSPAN3;GLUL;EDEM2;CES4A;VPS13D;MAOA;GNAI1;PYGM;ARHGEF26
NTF3	18	ASB2;AKAP6;RASL12;CASQ2;KCNAB1;MUSTN1;RAMP1;TPM2;JPH2;CSRP1;RBM24;PRKG1;MYOCD;REEP1;KCNA5;HEY2;MYOM1;MYL9
ANLN	18	MKI67;CCNB2;TPX2;NUSAP1;BUB1B;CENPF;NUF2;CEP55;PKMYT1;CDCA3;FOXM1;KIF2C;CDCA5;PTTG1;MYBL2;TOP2A;ASF1B;IQGAP3
RAP1GAP	18	B4GALNT4;PLEKHB1;EMILIN3;ETV4;B4GALNT3;DRP2;ITGB8;FBXO2;FXYD3;TMPRSS5;FA2H;ESRP1;KLK1;SOX8;C2orf82;COBL;ARHGAP39;BCAS1
GNA15	18	BATF;PLB1;NCF4;NINJ1;CYTH4;GPR183;C1QA;KCNQ1;F13A1;CD14;VAMP8;ARHGAP9;NOD2;HCK;SNX20;WAS;AIF1;PIK3AP1
RBM24	18	ASB2;ITGA8;NTF3;CNN1;CASQ2;HEY2;USP2;MYH11;DNAJB5;GADD45G;MYOCD;C11orf96;REEP1;SPEG;KCNA5;HES4;DGKG;PPP1R12A
GPT	18	LGALS12;PCK1;PTPRF;HRSP12;DCXR;MFSD3;GYS1;PFKFB1;LPL;IZUMO4;SLC2A4RG;FCN2;LDHD;GPD1;RP11-863K10.7;DGAT1;PDE8B;AGPAT2
DGAT1	18	LGALS12;ABCD2;C15orf38;SLC7A6;ACSS2;FAM166B;ACSL1;CTIF;COQ10A;ADORA1;GYS2;C19orf80;ELOVL3;CDKN2C;GPT;SREBF1;C14orf180;THRSP
BACE2	18	WSCD1;IL4R;CDC42EP3;SLC9A3R2;TMEM255B;EFNA1;RAMP2;SCNN1G;MECOM;UCP2;DLL4;CRHBP;EDN1;GALNT18;BMX;SERPINE1;MFAP3;NAGS
SMAP2	18	RCSD1;SESN1;ZBTB16;FGD3;TSC22D3;PHC2;SLA;FRAT1;ARHGDIB;FBXO31;MERTK;CXCR4;HCLS1;IRAK3;CYTIP;WAS;FRY;IFNGR1
MMP28	18	CCND3;FBXO31;GAS2L1;TM7SF2;CUTC;EZR;PDIA5;CEPT1;TSPAN7;LMCD1;LDLRAD4;SLC29A2;MBNL1;STARD3;NTHL1;PACSIN2;AVPR2;PNMT
NCOA3	18	BCL2L1;MAP1B;EPHA4;TIMP3;BMP2;TRERF1;TSC22D3;SOX13;CEPT1;EZR;DENND3;RAPH1;ANPEP;LRRC8A;GAS2L1;ARHGAP6;RASAL2;PACSIN2
ZEB1	18	DCN;RECK;CHD3;MFGE8;HDAC7;ADAMTS2;ZFHX4;OLFML3;SMARCD2;FSTL1;MTSS1;ANPEP;MAPK4;LOX;LAMC1;ZNF438;COL12A1;PCDHGC3
CDC37L1	18	EGFLAM;TWIST2;PLEKHF1;PIK3R1;ARID5B;LRRC17;SYBU;GAB2;SLC29A2;GLUL;TRAM2;LIFR;NHS;DTNA;MBNL1;MGEA5;CPSF4;SLC1A3
PPP1R1B	18	MDFI;HADH;PLA2G16;MYH14;ACVR1C;GPT2;DNAH9;RORC;CALB2;ALDH2;PDE3B;PEX19;EGFL6;PPP1R1A;GPD1;SCRN2;TMEM132C;PLIN1
TTC36	18	APMAP;GLIS1;GPT2;TM7SF2;ACVR1C;AMN;ACSS3;NDRG4;ALDH1L1;DNAH9;PCBD1;SYNPO;C15orf59;COX7A1;PMM1;UCHL1;AGPAT9;SLC27A2
NCF2	18	DOK3;SPI1;TBXAS1;TFEC;RNASE6;TYROBP;MPP1;KYNU;CD86;C1orf162;CCR1;ITGB2;ITGAM;APOBR;MNDA;DOCK2;PTPN6;PIK3AP1
FOXO1	18	NEDD9;PLEKHF1;BMP2;LRRC8C;WASF3;TACC1;TSC22D3;ZFHX3;LATS2;PER1;SMARCD2;PIK3R1;SYBU;GRASP;BAIAP2;FGFR1;NCOR2;RIMS3
PLOD1	18	CERS6;IGF2;RPS6KA2;OPN4;LRRC8A;NAGS;MPP3;EFEMP2;PEAR1;SPARC;IGFBP2;CCNG2;APLN;THY1;GALNT7;AGFG2;NDUFA4L2;PDGFB
RCSD1	18	RASGRP2;IGFBP2;SMAP2;TIMP3;NCK2;COL18A1;REM1;DAAM2;SOX13;CD4;ARHGDIB;IGFBP7;PRSS35;FHL5;HCLS1;PAXBP1;PARM1;PACSIN2
WDFY4	18	NCKAP1L;RAC2;TFEC;PIK3R6;DOCK2;CD22;VAMP8;FGR;KCNAB2;ARHGAP30;FERMT3;CARD9;SASH3;APOBR;LCP1;PTPN6;TYROBP;LY86
CST3	18	RASSF4;CILP;TIMP3;OMD;CLEC3B;TACC1;MAZ;CYP4B1;TP53I3;PLAT;CHST7;MGP;RHOBTB2;CFP;ANGPTL1;FBLN2;CYBA;GSN
ENPP2	18	WSCD1;FAM124B;NAGS;MECOM;FILIP1;CPD;SMAD1;EFNA1;SCNN1G;SLC9A3R2;DLL4;FBXO31;PKP1;IGFBP5;RHPN1;BMX;SLC6A6;SCNN1B
C5orf54	18	PLVAP;PPP1R3E;HEG1;NCK2;ZRANB2;MTR;CEPT1;NAPEPLD;TSPAN7;CYYR1;ELK3;PTPRB;ZNF512;ANKRD29;DHX34;FAM219B;ZNF514;JRKL
CALHM2	18	DCN;RARA;VASN;VIT;RARG;CSF1;IRS2;PPL;CILP;COL5A3;PCDHGC3;IGFBP6;EMP3;TTC7A;ADA;DBN1;DNMBP;GAS7
LYN	18	FYB;NR3C2;MYD88;INTS3;LST1;ABRACL;LCP1;DOK3;GUCY1A3;SPI1;NRROS;STXBP2;COL5A1;PLAGL1;SETD5;GPSM3;PIK3AP1;SH3BP1
FBXL3	18	SLC41A1;DNAJB4;ITGB2;BMP2;CCDC107;PELI2;REM1;INPP4B;KCNAB2;ARHGDIB;NEXN;ELF1;PYCARD;MBNL2;C10orf137;UBALD1;ZYX;FRMD3
ASAP3	18	PRICKLE1;PTGFR;PTPRS;RAB3IL1;EFNA5;ZCCHC24;RECK;MAP3K12;RUNX1;PALM;KIFAP3;MXRA8;C1S;ITPR3;GFPT2;PRRX2;EPS8L2;ZNF436
GLIS1	18	MDFI;HADH;APMAP;PAPSS1;SYNPO;ACVR1C;ANKRD53;DNAH9;FGFRL1;PEX19;EGFL6;FAM198B;SLC2A4RG;PTPN3;PMM1;GABRE;AGPAT9;TTC36
RGS13	17	RAB37;BATF;FCER1A;PIK3R6;CPA3;NDST2;KIT;ENPP3;CDK15;MRGPRX2;CMA1;HDC;VWA5A;SLC18A2;CTSG;MS4A2;HPGDS
ACTG2	17	ASB2;ITGA8;MRVI1;PDLIM7;CNN1;RASL12;CYFIP2;DES;MYH11;TPM2;TSPAN2;SLC8A1;RAB9B;PRUNE2;CSRP1;HMCN2;PDLIM3
SELL	17	SORL1;SERPINA1;FCN1;S100A8;IL18RAP;PROK2;VNN2;ARG1;MMP25;PTPRC;NFE2;CSF3R;CMTM2;S100A9;S100A12;CST7;MCTP2
RNF122	17	B3GNT5;ADAMTS1;ARID5A;CDKN1A;IL6;TNFAIP1;ZFP36;SOX17;ETS2;HBEGF;SPRY1;CASKIN2;FOSL2;GRASP;SIK1;CH25H;ARL5B
SVEP1	17	AMOTL2;PDGFD;TMC2;LRP1;SERPING1;ACSS1;GRIA1;FIBIN;PTX3;BICC1;GPC3;MYCBP2;SMOC2;C1S;C1R;ADM;PLXNA4
ACSL1	17	LGALS12;GPAM;PC;DGAT1;ACSS2;DGAT2;CYB5A;RBP4;ECHS1;LPL;NMB;AGPAT2;PRRT4;LDHD;MESP1;ABCD2;MARC1
PELI1	17	CNST;ITPRIP;ARID5A;PPAP2A;PELI2;TSC22D1;TACC1;CDK17;LRRC1;HBEGF;THEMIS2;ANGPTL1;JMJD1C;SRGN;APOLD1;KLF9;NAB2
SMAD1	17	PGF;WSCD1;HHEX;HDAC7;FAM43A;MECOM;ADAMTS9;ENPP2;ROBO4;FAM212A;ELK3;ERG;SCNN1B;GIMAP4;MYO5C;N4BP3;GPRC5B
PRRT4	17	TNK2;DGAT2;ACACA;ADIPOR2;ADORA1;MMP17;ACSL1;CLMN;RET;GPAM;OLFM2;SREBF1;C19orf80;DLAT;ACLY;LGALS12;THRSP
RERGL	17	CSDC2;RBPMS2;AMIGO2;ENTPD3;LINGO1;NRGN;MAPRE2;RCAN2;EPHA3;PRPH;TBX2;NMNAT2;LGR6;KCNA5;SORBS2;CARNS1;TMEM51
CDS1	17	SEMA3C;FAM19A5;GALNT12;ZDHHC7;WNT2;WNT10B;PAMR1;NHSL1;ITGA11;CD70;ZNF385B;TRIO;DBN1;SPSB4;DPP4;FGF16;COL6A6
ENG	17	THEM6;MAML3;TPD52;CPD;SMAD6;FLI1;ID3;ID1;FAM69B;CMTM8;TNFRSF8;PTPRB;CLEC14A;DUSP7;VWA1;CDH5;FRMD3
FUCA1	17	FCGRT;IL10RA;MFSD1;PPT1;MPP1;C1QC;C1QB;C1QA;TCN2;TYROBP;MCOLN1;FOLR2;NAGA;AP1B1;CD86;SUCNR1;CPVL
IL24	17	LIPA;DNASE2B;NCEH1;SDS;ALCAM;USP2;CTSD;AQP9;PLA2G7;FAIM3;DCSTAMP;SLC29A3;CCR5;DOCK3;NUP210;CD300LF;CD300LB
EFNB1	17	NAV1;AIF1L;IL4R;AKAP2;TBX3;FMNL3;DYRK3;HSPB8;HSPA12B;MGAT1;IFI16;ETS1;ZNF697;ZBTB46;SCN4A;KDR;ANKRD53
SPINT1	17	SPINT2;RHOV;AQP5;LYPD3;SERPINB5;ALCAM;GJB2;ESRP1;GJB6;CCDC64B;ST14;KCNN4;PVRL4;MMP7;EPCAM;HSD11B2;RAB25
ACSS2	17	AIF1L;ACSL1;PC;ADORA1;PCYT2;CYB5A;GNAZ;THRSP;DGAT1;TKT;ELOVL5;ME1;AGPAT2;ACLY;PPP1R16B;SREBF1;MID1IP1
TMEM61	17	GREM2;FAXC;HSPB3;ETV6;WNK2;PDE4D;KCNH2;MSRB1;CPNE6;PPP2R2C;CHRDL2;SHROOM3;TRPC4;WIPF3;TMEM158;WFDC2;PCDH7
ADAMTSL4	17	MAP1A;SIDT2;PLAGL1;GALNT12;BMP1;IRF4;GPR64;ESYT1;PCOLCE2;FCHSD2;NOD1;GABRE;LOXL4;GFPT2;HEMK1;PTPRK;FGFR1
GRN	17	LIPA;ACP5;NCEH1;ITGB2;APOBR;PLD3;PPT1;TBC1D2;HEXB;LAPTM5;CTSZ;SLC39A11;TTYH3;SH3BGRL;SLC15A3;GLA;TRPV2
CSDC2	17	ITGA8;PRDM16;MYOM1;RERGL;RASL12;CASQ2;RBPMS2;RAMP1;MUSTN1;KCNAB1;AKAP6;NPNT;SPEG;EDNRA;KCNA5;LDOC1;TMEM51
NUP210	17	FAIM3;C11orf21;RAC2;CD48;IKZF1;PTPN7;PRKCB;LY9;RUNX3;PTPRC;CCR5;GZMM;DENND1C;LIMD2;TBC1D10C;CD3E;IL24
EFNA1	17	WSCD1;GPR146;NAGS;ANXA2R;AGFG2;GPIHBP1;ENPP2;TMEM255B;GALNT18;BACE2;DLL4;SCNN1B;ZNF792;ABLIM2;ADM5;PTPRK;N4BP3
PRKACB	17	PHTF2;EPM2A;RAB9B;KCNH2;CPNE6;RASSF3;PRKCB;RNF180;RGS19;P2RX1;TCEAL1;NCKAP1L;DTNA;SH3BGRL;MYL9;PIP4K2A;TMEM252
ALDH1L1	17	ACSS3;HADH;PLA2G16;TTC36;TM7SF2;GPT2;PFKFB1;PC;GLYCTK;SLC7A10;ECHS1;LPL;REEP6;LDHD;DECR1;CIDEA;GYG2
ANO9	17	KLRB1;RASGRP1;ITK;LTB;SH2D1A;TMC8;RLTPR;GZMK;PLCH2;CD5;CD6;LCK;TRAT1;ZAP70;CD2;CD3D;CD3E
SGCA	17	ITGA8;MYH11;RYR2;CNN1;RASL12;CYFIP2;DES;RAMP1;TPM2;NCS1;NPNT;COL4A5;PDLIM3;REEP1;SPEG;WFDC2;HSD17B6
COL17A1	17	CCDC64B;KRT77;AQP5;RHOV;TFAP2A;KRT23;DCD;SCGB2A2;MUCL1;CALML5;GJB6;SFN;ESRP1;GRB7;ZNF750;SERPINB5;TFAP2C
SH2D1A	17	KLRB1;RASGRP1;SPOCK2;GZMM;TRAT1;ITGA4;FAM46C;SH2D2A;LCK;GZMK;ZAP70;CD2;ITK;CD8A;DUSP2;CD3E;ANO9
UNC119B	17	AMOTL1;NEDD9;LDOC1L;FAM168B;TICAM1;NDST1;EXTL3;JUN;MLEC;KLF6;RGP1;ARHGAP10;TBC1D13;CBX6;PPP1R16B;CD99L2;KLHDC10
KMO	17	DNASE2B;PGBD5;STAB1;TFRC;SDS;DOCK3;CTSD;DCSTAMP;AQP9;CYP27A1;PLA2G7;MFSD12;ASPHD1;MYO9B;SLAMF9;F13A1;IFITM10
PI16	17	DCN;MRC2;CCDC80;ELN;WNT2;ASPN;UAP1;FBN1;CILP;TPPP3;MFAP4;PDGFRL;PXN;GPR133;GFPT2;FSTL1;HTRA3
GABRE	17	MDFI;ANKRD53;ADAMTSL4;PTPRF;AQPEP;GLIS1;EPB41L4B;TMEM132C;ECHDC2;ZMAT1;MAOB;PNPLA7;SLC25A27;PLAGL1;TTC18;HES6;PLIN1
TRIO	17	ACPL2;ADD3;PLEKHG4;WNT2;WNT10B;NHSL1;FBN1;SPSB4;AGAP1;COL1A2;CDS1;CD70;COL6A3;COL6A6;DPP4;FGFR1;ANKRD28
PLEKHO1	17	SSPN;DBNDD2;AKAP6;LRRC4B;RASL12;PTPN13;LRRC17;RASSF3;NCS1;CCDC84;NPNT;WDR27;SLIT3;P2RX1;FLNA;ITIH3;HEY2
KLF11	17	MLYCD;RAB20;SERTAD4;GJA5;PIM1;PPT1;GNAZ;CUTC;GUCY1A3;ZNF697;MGAT1;ADRB2;SLC29A3;PDK4;NMT1;CASKIN2;SETD5
C10orf128	17	NPDC1;ITGB4;CFI;CCM2L;CDC25B;ARFGAP1;SULF2;ARHGEF3;PLCG2;LPCAT4;SPNS2;FAM110D;ALDH1A2;ST6GALNAC1;DARC;GPR68;TSPAN7
HES4	17	CACNA1H;TBX2;HEYL;KLHL26;TMEM259;H1FX;TRAPPC5;FOXC2;SCAND1;RBM24;CYBA;FBXL15;C11orf96;C4orf48;HEY2;LRRC10B;PHLDA2
SLC29A2	17	CDC37L1;HSPB7;PREX2;NSDHL;ARHGEF16;CCND1;GAB2;MGLL;CLMN;LRRC16A;LMCD1;PRR16;MMP28;ARRDC2;SYBU;ROCK2;NUDT8
ABCC1	17	DCN;ETFA;FAM180B;ADCY7;SERPINA5;OMD;PDE1B;PCED1B;CD34;FBXL7;CILP;ANGPTL5;ZFHX3;FBLN2;CORO2B;STXBP6;ABHD5
SESN1	17	SMAP2;COL4A3BP;ARID5B;YPEL2;TACC1;TSC22D3;G0S2;IER5L;GLUL;TRAM2;KLF9;FAM214A;TXNIP;NAB2;TLDC2;HOXA9;ARHGEF26
DTNA	17	CDC37L1;RAB9B;ARHGEF9;KCNQ4;SLC8A1;TCEAL1;RBPMS;JPH2;REEP1;PYGB;SYNM;PRKACB;GATA6;ITPR1;LMOD1;PHYHIP;PPP1R14A
ZNF219	17	KIFC2;C9orf16;HSD17B10;NEK7;ALCAM;ASPH;RNPEPL1;PARD6A;TCIRG1;BAD;HEXIM1;FAM229A;MBD3;UCHL1;PWWP2B;ZNF358;RAB8B
SERPINE1	17	NEDD9;BACE2;ZMYND8;LONRF1;CDC42EP3;RPGR;TSC22D3;CYR61;ITGA5;TNFAIP3;IER3;DDIT4;FHL3;ANKRD37;EDN1;STK39;FRY
PAXBP1	17	SREK1;PDGFB;TRMT13;NAA25;TTLL4;PNISR;MYH9;HEATR1;RPS6KA2;TIA1;TRAM1;MTPN;RCSD1;ESAM;ARHGDIB;CDH5;BTAF1
RRAD	17	CACNA1H;LPHN3;MRVI1;ARHGAP10;CCDC107;CPEB4;RCAN2;SLC7A2;INPP4B;ADRA2B;LGI4;MERTK;NEXN;ARRDC2;NCK2;LMOD1;PACSIN2
TSPAN6	17	SDPR;SIK1;SGK223;LNX1;KALRN;S1PR1;TSPAN13;DSC2;ELTD1;GNAZ;APOLD1;SRGN;ADRB2;PML;CA4;ST6GALNAC3;CLDN5
GAS1	17	IL17D;DCN;FAM180B;ADD3;PPAP2B;LRP4;OMD;SSC5D;FNDC1;IL16;PCOLCE2;CILP;UST;PID1;COL16A1;LPAR1;FGF16
RBPMS	17	RECK;RAB9B;MAOB;RAMP1;CCDC81;PCED1B;CD34;TPM2;CSRP1;MYOCD;DTNA;TEAD3;FLNA;ITIH3;PPP1R14A;KCNQ4;MYL9
PPRC1	17	CCNL1;ZMAT1;BYSL;SLC20A1;MECOM;ZBTB18;TNFAIP2;TRAM1;WDR43;NOP2;RRP12;URB2;NOL6;CHD1;B4GALT5;MAK16;BCL3
ZNF629	17	DOLK;SMCR8;RPRD2;THOC1;ATP13A3;ZFC3H1;HPS6;ARHGAP31;ERG;ZNF574;IFRD1;GIMAP4;CLK1;GIMAP6;LDOC1L;PSME4;VPS13C
TSPAN13	17	BMP6;DOCK9;TUSC3;S1PR1;DSC2;ELTD1;MFSD6;USP13;CMTM8;TSPAN6;TMCC3;SRGN;TCF4;EDNRB;PDE2A;CDH5;CCDC85A
CEPT1	17	HADH;DMRT2;C5orf54;GAS2L1;LRRC8C;DENND2D;LNX1;TACC1;PFKFB3;NCOA3;AQPEP;MMP28;ELF1;SCML1;TM7SF2;ACVR1C;GLCCI1
MYD88	17	PHPT1;MNDA;PARP9;SETD1B;CTSO;FMNL2;CMPK2;CLMN;P4HA2;CCR1;OAS2;LST1;CBX7;LYN;SETD5;SASH3;EPHB4
CORO1C	17	VASN;ORMDL3;ACVR1C;CAV1;ILK;GLRX2;ITGA5;RUSC2;ZYX;RAB32;DLGAP4;ZCCHC2;FLNA;FADS3;SLC27A2;DDAH2;EPDR1
PRKCB	17	ASB2;CD53;SYNM;CD48;LST1;NUP210;PCP4;NCKAP1L;ARHGAP30;STXBP2;PTPRC;LGI3;SLC8A1;LCP1;PRKACB;IKZF1;SASH3
MFSD1	17	CD53;C3AR1;NPTN;TBXAS1;DOK2;PARP16;VAMP8;MPP1;GLIPR1;C1QC;C1orf162;SKAP2;CTSZ;TYROBP;AP1B1;FUCA1;LAPTM5
TFF3	16	APBA2;TBX1;PIEZO2;THSD4;STAB2;RP11-451M19.3;PROX1;GPR97;ABCA4;PRKCZ;GPM6A;RELN;KBTBD11;CCL21;MMRN1;PKHD1L1
IFI44L	16	IFITM1;IRF7;PARP9;IFI27;CMPK2;ODF3B;MX2;LY6E;EPSTI1;MX1;REC8;OAS2;ISG15;DDX60;IFIT2;HERC6
DUSP2	16	RASGRP1;PMAIP1;ITK;CD5;SH2D1A;ITGA4;LY9;CD69;GZMK;TRAT1;RUNX3;SH2D2A;PRDM1;CXCR4;CD8A;FAM46C
CMA1	16	RAB37;BATF;TRIM63;FCER1A;RGS13;CPA3;CTSG;TPSG1;HDC;CDK15;VWA5A;GFRA1;SIGLEC6;KIT;MS4A2;CXCL14
HERC6	16	OAS1;IFIH1;STAT1;IFI27;DDX60;SAMD9L;EPSTI1;MX1;IFI44L;RTP4;OAS2;ISG15;CMPK2;HERC5;DDX60L;IFIT2
TMEM160	16	CEBPA;NR2F6;PRR7;EVA1B;COMTD1;ZNF865;TRAPPC5;ANKRD9;FAM173A;FBXL15;KLF2;PDF;C4orf48;CCDC85B;ZNF428;SOD3
DGAT2	16	LGALS12;GPAM;HOOK2;PRRT4;ACSL1;MRAP;ADORA1;GYS2;C19orf80;ELOVL3;HSPA12A;DUSP4;ARHGEF40;C14orf180;THRSP;AGPAT2
SPSB4	16	TRIO;CD70;FGF16;C1QTNF3;WNT10B;FNDC1;FBN1;TPPP3;ITGA11;CDS1;NHSL1;PCOLCE2;FNDC5;CREB5;GAS7;DACT2
COL6A2	16	COL4A1;CALU;ECM1;COL5A2;CNTN3;FAT1;COL5A1;SLIT3;ANPEP;DLGAP4;COL3A1;COL6A1;COL1A2;THY1;COL6A3;COL4A2
GPRC5C	16	TRNP1;INPP5A;RBPMS2;LGR6;TOB1;LINGO1;PDGFA;FRZB;PIP5K1B;KCNAB1;NRARP;TBX2;EFHD1;GPR20;LRRC10B;TMEM51
TBC1D10C	16	GZMA;CD48;IL2RG;GZMM;LCK;DENND1C;CERKL;PTPN7;ZAP70;CD2;TRAF3IP3;LIMD2;RASAL3;NUP210;CD3E;CCR5
CENPM	16	MKI67;NUSAP1;CDCA5;CDK1;CCNB2;ZWINT;CEP55;H2AFX;PKMYT1;TYMS;AURKB;TK1;PTTG1;MYBL2;ASF1B;IQGAP3
TIMP2	16	FAM180A;FAM180B;ANTXR1;LTBP2;SSC5D;MMP2;CYBRD1;ANGPTL5;MFAP4;HTRA1;PLXDC2;MXRA8;COL16A1;DPP4;CTHRC1;PCDHGC3
CSF2RB	16	TACR1;LMNB1;BCL3;SELE;RIPK3;RAMP3;CSF3;ETS2;IFI16;CPNE8;GPR68;ICAM1;DARC;RELB;TMEM173;HAPLN3
LRRC1	16	TIAM1;PLCB4;PELI2;RPGR;S1PR1;PRKCE;KLF9;MTUS1;SPRY1;TMTC2;TACC1;PELI1;KIF21B;LIFR;FOXC1;TSPAN7
RGL1	16	RNASE1;CLEC10A;CCL13;LYVE1;RAB3IL1;IL12RB2;CYBB;CD14;F13A1;TBC1D14;LGI2;SLCO2B1;CD200R1;FADS3;SIGLEC1;ABCA8
ITGA4	16	RASGRP1;ITK;CD5;GZMM;SH2D1A;TRAT1;CD69;CERKL;RUNX3;SH2D2A;PTPRC;ZAP70;CD8A;IKZF1;CD3E;DUSP2
SLC7A2	16	CNR1;SEMA5A;NCK2;RRAD;ZNF703;TACC1;RCAN2;INPP4B;CSRNP3;LGI4;COL18A1;FHL5;ARHGAP6;NOTCH3;PARM1;PACSIN2
CFP	16	CLEC10A;CYBB;PTPN18;IL10RA;FGD3;DOCK2;VSIG4;SELPLG;DOK2;ITGAM;GFRA2;RNASE1;CST3;LYVE1;SIGLEC1;FOLR2
NRROS	16	DOK2;SPI1;LYL1;IRF5;FERMT3;GPR34;ARHGAP30;CCR1;SGSM3;SH3BP1;GIT2;MCOLN1;LCP1;LYN;PLEK;PTPN6
SMTN	16	SAMD14;PDLIM7;RASL12;CKB;MPP2;CYFIP2;KCNH2;TPM2;MCHR1;ETV6;ITM2C;CFL2;TRPC4;TGFB1I1;HSD17B6;ITGB1BP2
UCHL1	16	ZNF219;GPC1;CRYAB;OSGIN1;ASPH;MAP1B;EGFL6;TTC36;SNCG;C10orf90;COX7A1;FADS3;P2RX6;MSC;HTRA1;HSD11B1
IFIT2	16	IFI44L;IFIH1;PARP9;STAT1;CMPK2;PARP12;TRIM21;EPSTI1;MX1;OAS1;RTP4;OAS2;ISG15;HERC6;HERC5;IFIT5
CARD10	16	HID1;FAM213B;MFNG;ECSCR;LHX6;CCM2L;AVPR2;PEAR1;KIF26A;SULF2;EGFL7;ELK3;PRKAR1B;STOX2;AGFG2;CBX2
EPCAM	16	AQP5;SCGB2A2;FXYD3;RHCG;KRT23;TFAP2C;GJB2;RHOV;GJB6;CCDC64B;ESRP1;SPINT1;KRT7;PIP;LAD1;RAB25
SCN7A	16	EMILIN3;ZBTB7C;SFRP5;SOX10;SORCS1;GRIK3;COL9A3;NCAM1;MYOT;PLP1;NRXN1;GFRA3;CLDN1;AATK;MPZ;MAL
CCDC71L	16	RGS16;UGCG;LMNB1;PNRC1;SLC39A14;ARID5B;ITPKC;HIF1A;CSF3;NAV1;IFI16;NNMT;MARCH3;WDR1;RUNX1;RNF146
CCR2	16	SERPINA1;FCN1;AOAH;CX3CR1;MYO1G;AMICA1;RGS18;LTB;ASGR2;GAPT;NFE2;CD2;TRAF3IP3;SNX20;TLR8;CD300E
LPHN3	16	RYR2;RRAD;SYTL2;LMOD1;MUSTN1;RCAN2;RTKN;NPNT;PRKG1;MYOCD;FHL5;SH3BGRL;TAGLN;CALD1;EDIL3;MYL9
DAPK3	16	SLC41A1;NEDD9;FBXO46;MYCT1;MYH9;VCL;ILK;C10orf2;KLF6;STX12;ZYX;FAM26E;USP31;TGFB3;STK38L;PICALM
CMTM5	16	PMP2;ENTPD2;SFRP5;GRIK3;COL9A3;NRXN1;FOXD3;PLEKHB1;RBM11;GFRA3;AATK;PLP1;FAM101A;MPZ;MAL;NLGN3
THBD	16	EFHD2;MIDN;NPDC1;ADAMTS1;HEG1;RASIP1;HYAL2;RAMP2;ETS2;DLL1;CASKIN2;ADAM15;EMP1;GRASP;PIK3R3;SLC9A3R2
RBPMS2	16	CACNA1H;CSDC2;SORBS2;NRGN;INPP5A;FRZB;PIP5K1B;RCAN2;TBX2;NFASC;LGR6;KCNA5;CYTIP;RERGL;GPRC5C;TMEM51
TMEM35	16	ASB2;ITGA8;RAB9B;KCNH2;WNK2;DES;CPNE6;MCHR1;ITM2C;COL4A6;SYNM;BCHE;REEP1;HMCN2;SLC8A1;PI15
EHD4	16	PRKCH;SLC44A2;ECSCR;LHX6;ARHGAP31;COL15A1;SH2D3C;ELTD1;CD93;ELK3;SPNS2;GPR56;PRKAR1B;FAM129B;CYYR1;CMIP
TMTC2	16	PLVAP;TLL1;PLCB4;ITGB4;CFI;CDC42EP3;HOXD1;LRRC1;KL;TIAM1;LPCAT4;TSPAN7;DARC;DUSP23;MCTP1;PTPRB
SMOC2	16	IGF2;TNNT3;ALPK2;PDGFD;WISP2;GRIA1;SVEP1;OSR2;PCSK5;SH3PXD2B;NID1;GPC3;C1S;C1R;SLC6A15;GAS6
PLAGL1	16	INTS3;LGR4;EGFLAM;IFNGR2;ADAMTSL4;ANTXR2;EFS;VCAN;WDR27;SIGIRR;GABRE;GART;BZW2;IGDCC4;LYN;ARHGEF26
KCNAB1	16	RAMP1;MYH11;NTF3;RASL12;PIP5K1B;ITGA8;RCAN2;PDE3A;TPM2;CSDC2;GPRC5C;EFHD1;MYOCD;SH3BGRL;LMOD1;PDE5A
G0S2	16	MDFI;TUSC5;PLA2G16;PCK1;LIPE;SESN1;HOOK2;FABP4;PDE3B;PKDCC;GPD1;ATP9A;LAMB3;KIAA0922;COX14;DTX1
DLGAP4	16	COL6A2;PLSCR1;SMG9;FAM214B;LCAT;RUSC2;CORO1C;YWHAH;TTC7A;COL6A1;DBN1;IL17RE;SNX21;TNFRSF12A;FADS3;ARHGEF2
GPR183	16	HSPB7;TFEC;RNASE6;TYROBP;C3AR1;GNA15;RIN3;LAPTM5;TFRC;RGS1;GLA;SRGN;SAMSN1;CYTIP;SLA;GNA13
NAGS	16	BACE2;WDR54;FBXO31;MECOM;ALDH1L2;PDIA5;PLOD1;ENPP2;SPARCL1;EFNA1;SCNN1G;DLL4;SCNN1B;ABLIM2;NDUFA4L2;S100A16
PAMR1	16	ADAMTS5;FAM19A5;CD70;ANXA4;JHDM1D;CDS1;NHSL1;ECM1;PCOLCE2;PSD3;GALNT12;MCOLN3;DBN1;DPP4;FGF16;PCNXL2
PODXL	16	TSPAN18;PRKCH;DOCK9;HEG1;RASGRF2;SLC9A3R2;PKN3;KIAA1671;DAB2IP;KIF26A;HSPA12B;PCDH1;PTPRB;HYAL2;NCOR2;CRIP2
LRP1	16	MVP;PTPRS;CALM1;SLC7A6;EFNA5;FAM20C;SVEP1;SMAD3;C1S;SERPING1;HOOK2;MYCBP2;TRIP10;C1R;BCL6;AR
KCNQ4	16	ASB2;LRRC4B;GRIK5;COL4A5;RYR2;RBPMS;ITIH1;GATA6;NPNT;TEAD3;CAMK2G;DTNA;REEP1;ITIH3;LMOD1;RIMS3
FMNL2	16	SAT1;TNIP1;TMEM64;ANKRD53;YPEL2;PDE1B;TLDC2;ASPH;AIF1L;HSPB8;SCN4A;PDK2;ARHGAP10;ELOVL5;SAMD4A;MYD88
AUTS2	16	DCN;CCDC39;ADD3;RASSF3;ABCA8;PIEZO2;EFNA5;PDE7A;ANK2;HMG20B;TMEM47;RGMA;DPP4;FAM134B;COL12A1;MYL9
PPP1R13B	16	SOX18;PCGF2;LYL1;EPHB4;CCM2L;AVPR2;MEOX1;ARHGAP31;PKN3;CLEC14A;ZBTB46;SH2D3C;JAG2;FAM117A;CDH5;ELFN1
LGI2	16	RNASE1;STAB1;LYVE1;NCF4;RGL1;CMKLR1;VSIG4;CSF1R;CYBB;F13A1;SLCO2B1;CD200R1;HCK;MYO7A;AIF1;TBC1D14
ITM2A	16	SLPI;DCN;LTBP4;RASSF4;FAM107A;FAM69B;TSPAN7;VIT;VIPR1;GSN;FBLN2;ARHGAP6;GDF10;CXCL14;FBLN5;EBF2
GLMN	16	SH3BP4;UTRN;HEG1;ARHGAP31;CDH5;APP;ERG;HOXB7;MEF2C;MTPN;NR2C1;POLR2A;SF3A1;CLK1;THOC1;LUC7L
HIPK3	16	KCTD3;NEK7;CNN3;SLC38A2;TPO;MKL2;ZNF385D;ETS2;DARC;BMPR2;LIFR;PTBP3;DUSP23;MCTP1;MAN1A1;FAM110D
PDIA5	16	NAGS;MYRIP;TMEM255B;EML4;TIAM1;LPCAT4;ERG;SCN1B;TSPAN7;ABLIM2;GIMAP4;DLL4;FRY;AGFG2;MFAP3;MMP28
PTTG1	16	MKI67;CCNB2;TPX2;ANLN;NUSAP1;BUB1B;CENPF;NUF2;SPAG5;CEP55;CENPM;PKMYT1;CDK1;IQGAP3;MYBL2;TOP2A
TFAP2C	16	SFN;AQP5;VSNL1;KRT23;VAV3;SCGB2A2;RHOV;CALML5;GJB6;CCDC64B;ESRP1;EPCAM;ZNF750;TRPV4;SERPINB5;COL17A1
TRPM2	16	STAB1;FGD3;NCF4;DOCK2;SDC2;CD163;HMHA1;P2RY13;HCLS1;CD14;FAM26F;HCK;ARHGAP4;F13A1;EBI3;SLCO2B1
DSC2	16	CA4;NR3C2;NIPAL3;SGK223;LNX1;ENPP4;TSPAN13;CPD;GNAZ;MFSD6;PDE9A;MMEL1;TSPAN6;BST2;NRG2;CADM2
IGIP	16	CREBBP;NR3C2;COPZ2;LNX1;TMEM81;H1FX;ATF7IP;MEF2C;SMCR8;C7orf41;PTPRB;GNRH1;PPP1R18;LUC7L;CCDC85A;SF3A1
TSPAN2	16	DBNDD2;PDLIM7;WDR1;ACTG2;RASSF3;SLC8A1;MSRB1;TPM2;DNAJB5;REEP1;TRPC4;CSRP1;TGFB1I1;TMEM47;HSD17B6;RASL12
NRXN3	16	B4GALNT4;PMP2;NCAM1;GFRA3;GAS2L3;SFRP5;SOX10;SORCS1;COL9A3;NRXN1;FA2H;PLEKHB1;FOXD3;MT3;MPZ;MAL
TEX261	16	SAT1;HAPLN2;C20orf24;CCDC107;ZNF740;CPEB4;ISOC2;RASSF4;NLE1;ORMDL3;PGP;ST6GALNAC6;NOL6;CD99L2;C6orf226;GIGYF1
EPS8	16	DMRT2;SOX13;MAML2;TCF21;RABGAP1;RNF182;PEAR1;CHSY3;NOTCH3;RAB2A;PELO;ARHGDIB;TIMP3;FRY;RASAL2;MYOF
MSRB1	16	SELM;PDLIM7;TMEM61;KCNH2;PCDH7;TSPAN2;CSRP1;CFL2;TRPC4;REEP1;TGFB1I1;VASP;WFDC2;PDE4D;HSD17B6;ANKRD28
VASN	16	MMP14;FAM180A;SERTAD2;ELN;ST3GAL5;CALHM2;MRGPRF;ACKR3;RUSC2;CORO1C;TRAM2;TTC7A;DBN1;ZNF503;PPL;FHOD1
ATP1A1	16	FAM198B;NEBL;RGS5;S1PR1;TMEM74B;CD34;MASP1;NTRK2;COX4I2;LAMA3;ELF1;KAT6A;SCN4B;MCTP1;C15orf41;CRIP2
LDLRAD4	16	LRCH1;ZBTB10;LNX1;TACC1;GNA13;EZR;SDPR;MMP28;ANGPTL1;CDKN1B;ELF1;MBNL1;RASAL2;CYBA;CTTNBP2NL;PACSIN2
CKM	15	TCAP;ACTN2;ACTA1;TNNC2;MB;CMYA5;TNNC1;KLHL41;MYL2;MYLPF;MYBPC1;MYL1;TRIM63;EEF1A2;COX6A2
MB	15	TCAP;ACTN2;ACTA1;TNNC2;CKM;COX6A2;KLHL41;MYL2;TNNC1;MYBPC1;MYL1;ANKRD1;TRIM63;EEF1A2;MYLPF
CTSG	15	RAB37;CPA3;FCER1A;RGS13;VWA5A;ENPP3;CXCL14;KIT;PIK3R6;CMA1;HDC;MRGPRX2;SIGLEC6;MS4A2;HPGDS
PKHD1L1	15	FAM189A2;STAB2;TBX1;NTN1;MMRN1;TFF3;NTS;CCL21;PRKCZ;GPM6A;KBTBD11;TSPAN5;RP11-451M19.3;FZD10;PROX1
S100A12	15	SELL;SERPINA1;LCN2;VNN2;ARG1;C19orf59;PROK2;S100P;MMP25;PPBP;S100A9;S100A8;CSF3R;CMTM2;NFE2
MS4A2	15	RAB37;FCER1A;RGS13;VWA5A;KIT;CMA1;MRGPRX2;CDK15;PIK3R6;TPSG1;HDC;CPA3;SIGLEC6;CTSG;HPGDS
RASIP1	15	EGFL7;PLEKHG1;SEMA3F;ABI3;SNRK;TCF15;DLL1;PIK3R3;CASKIN2;SH2D3C;GRASP;HYAL2;THBD;SNAI1;BCL6B
KIT	15	RAB37;FCER1A;RGS13;CPA3;NDST2;CMA1;CTSG;PIK3R6;TPSG1;HDC;MRGPRX2;SLC18A2;SIGLEC6;TRIM63;MS4A2
ICAM1	15	CCL2;CSF2RB;PIM3;SELE;NFKBIA;BIRC3;TIFA;NFKBIE;SPNS2;TNFAIP3;RELB;NFKB2;IER3;CSF3;BCL3
PPP1R1A	15	PLA2G16;PPP1R1B;LIPE;TM7SF2;ACVR1C;EPB41L4B;CALB2;ALDH2;PDE3B;GPD1;GPX4;MYH14;HEBP2;PLIN1;CIDEA
CD69	15	TRAT1;ITK;RHOH;SKAP1;ITGA4;FAM46C;RUNX3;SH2D2A;CD7;RGS1;PIK3R1;CD8A;GZMK;IKZF1;DUSP2
UBE2L6	15	IFITM1;PARP9;STAT1;RARRES3;CMPK2;PSMB8;LY6E;WARS;EPSTI1;PSME1;OAS2;SAMD9L;PSMB9;BST2;IL18BP
CD6	15	CD2;RASGRP1;ITK;SKAP1;TMC8;TRAT1;GZMK;CD5;KLRB1;ZAP70;SPOCK2;CD3E;CD3D;LCK;ANO9
FAIM3	15	LIPA;RPS6KA1;CD52;CTSD;LY9;PLA2G7;SLC29A3;IL24;HCST;TREM2;LCP1;DNASE2B;NUP210;MATK;CCR5
LIPE	15	PPP1R1A;TUSC5;PLA2G16;FNDC4;PFKFB3;EPB41L4B;G0S2;MRAP;CAT;PNPLA2;FABP4;GPD1;HEBP2;TMEM132C;CIDEA
IL1RN	15	CD52;ALCAM;TREM2;DCSTAMP;AQP9;PLA2G7;ST14;TREML1;SPP1;CD300LB;SLAMF9;NCAPH;FGR;MATK;FBP1
ANKRD29	15	LAMA3;PLCB4;JRKL;RUNDC3B;CDH24;CYYR1;NPDC1;LIFR;RAPGEF3;ST6GALNAC1;FAM13C;GIPC2;C5orf54;PARM1;TSPAN7
CST7	15	SELL;SORL1;GZMA;IL18RAP;CD5;GZMM;SKAP1;CD8A;RUNX3;SH2D2A;PTPRC;MMP25;MCTP2;CD3E;NKG7
CHIT1	15	DNASE2B;LIPA;CD52;MFSD12;SDS;TREM2;ACP5;CYP27A1;PLA2G7;DCSTAMP;SPP1;FBP1;MMP9;MMP7;CAPG
CISH	15	EGFLAM;IGF1;ARID5B;SLC39A14;DDR1;C5orf30;DHRS3;SIDT2;BBS10;GLUL;NNMT;RGS3;PTPN3;IKZF4;SLC1A3
WSCD2	15	FAM180B;FAM19A5;CD70;WNT10B;SFRP4;FNDC5;NOVA1;DKK2;FNDC1;PCOLCE2;IGFBP6;WNT9A;WNT2;FGF16;DACT2
MYO1G	15	SERPINA1;GZMA;CD48;BATF;C11orf21;DENND1C;CCR2;CYTIP;PTPRC;NOD2;TRAF3IP3;SNX20;CD300E;CD3E;NKG7
FAM69B	15	LYL1;ENG;FLYWCH2;AVPR2;FABP4;RGS5;ITM2A;ARHGDIB;PTPRB;CDH5;CLEC14A;GIPC2;DACH1;GATA2;TSPAN7
BTG2	15	JUNB;ADAMTS1;FOS;TSC22D1;CDKN1A;CEBPD;CSRNP1;APOLD1;SPRY1;MCL1;FOSL2;SLC25A25;DUSP1;ZFP36;ATF3
CD3D	15	CD27;TRAT1;GZMA;LTB;GZMM;TRAF3IP3;TMC8;LCK;CD5;CD6;ZAP70;CD2;CD8A;CD3E;ANO9
SLC39A14	15	SLC41A1;ZNF217;ARID5B;BMP1;ANTXR2;CCDC71L;DDR1;VCAN;GLUL;NNMT;EDEM2;CISH;MARCH3;DAB2;NOD1
TLL1	15	TGFBR2;THSD7A;ECSCR;CFI;ZNF385D;TACR1;TIAM1;LPCAT4;MFAP3;TMTC2;DARC;RAB3C;SEMA6A;GPR68;ITGB4
AGFG2	15	GPR146;PLOD1;CDC42EP3;THSD7A;PDIA5;CARD10;PEAR1;EFNA1;MECOM;KIF17;DLL4;FBXO31;ABLIM2;LRMP;NYAP1
LPL	15	GYG2;ACVR1C;PTPRF;PFKFB1;ALDH1L1;ACSL1;PPARG;LDHD;RBP4;AGPAT2;GPT;GPD1;S100B;MARC1;PLIN1
MCTP1	15	HIPK3;KIAA0040;CNN3;RELL1;MKL2;ZNF385D;FAM107A;ERG;TSPAN7;ATP1A1;CYTH1;PTPRK;MAN1A1;RALGAPA2;TMTC2
VASP	15	PDLIM7;PIP5K1C;MSRB1;VCL;ILK;DNAJB5;RGS19;YWHAH;CBL;ESAM;IQCJ-SCHIP1;TGFB1I1;MCU;STK38L;ZYX
BTAF1	15	TMEM63A;PAN2;TRMT13;HEATR1;FUBP1;TMCO6;ZNF514;SH3BGRL;DNHD1;SGK494;STX16-NPEPL1;RBM12B;BAZ2A;PAXBP1;LUC7L3
RBP4	15	CSTA;MGST1;PTPRF;ACSL1;MRAP;ECHS1;LPL;GPD1;AGPAT2;PLIN1;GYG2;REEP6;PYGL;THRSP;S100B
ADORA1	15	LGALS12;GPAM;APBB1IP;ADIPOR2;DGAT1;PRRT4;DGAT2;RORC;SREBF1;ACLY;ACACA;ACSS2;FAM134B;THRSP;SLC35C1
TACR1	15	CSF2RB;TLL1;CFI;RELL1;MKL2;ZNF385D;TIAM1;OLFM1;TSPAN7;DARC;ADM5;CYYR1;CMIP;GPR68;GABRA2
AOX1	15	RASSF4;AMOTL2;VIT;CUTC;OLFML3;CYP4B1;CSF1;SMAD3;AR;SMARCD2;PARD3B;C1S;LOX;FSTL1;CXCL14
LY9	15	DUSP2;CD48;TAGAP;FAIM3;CD27;RLTPR;FAM46C;RUNX3;IGJ;CXCR4;GZMK;CD79A;NUP210;CD3E;MS4A1
ADCY3	15	YPEL5;PODN;EGFLAM;ANTXR2;KIRREL;NINJ2;ADRA2A;CDC42EP4;MGAT3;GBE1;IGFBP4;VPS13D;SEPT4;CPSF4;SH3KBP1
FAM101A	15	B4GALNT4;PMP2;EMILIN3;CRABP1;SFRP5;DRP2;SORCS2;GRIK3;FOXD3;SLC2A1;ADAMTS14;GFRA3;AATK;CMTM5;BCAS1
ALDOA	15	EGLN3;MESDC1;CTSO;CKMT2;MGLL;ADRA2B;PFKP;GYS1;ENO1;ANKRD37;APLN;PPP1R3G;KDM3A;ZNF395;GBE1
TLDC2	15	C10orf10;KCTD3;ARID5B;CUTC;FMNL2;TSC22D3;SLC38A2;USP53;MKL1;ITPKC;AKAP13;ARHGAP10;FIBIN;KLF9;SESN1
ARHGAP9	15	CD53;PLCB2;STXBP2;NCF4;MYO1F;CCDC88B;SLA;DOK3;GNA15;PTPRC;HMHA1;HCK;PSTPIP1;WAS;GPSM3
GUCY1A3	15	KLF11;AMIGO2;CASQ2;EFS;SMG9;RNF180;IFI30;SETD1B;MYOCD;GUCY1B3;EDNRA;LYN;SORBS2;HEY2;ZEB2
ADAMTS1	15	HEYL;BTG2;THBD;HYAL2;JUNB;CSRNP1;RNF122;ETS2;NR4A3;SSTR2;FOSL2;GRASP;C11orf96;MYC;NFIL3
ANGPTL7	15	PMP2;EMILIN3;ZBTB7C;SFRP5;DRP2;ITGB8;SORCS2;SORCS1;COL9A3;AK5;NGFR;PLP1;CLDN1;MPZ;PTPN5
SLC29A3	15	CD52;FAIM3;KLF11;ASPHD1;CD22;IGSF6;NCEH1;MATK;TREML1;CD300LB;NCAPH;IRAK3;UCP2;C11orf45;IL24
ZBTB18	15	TPD52;NEDD9;CDC42EP3;CDKN1B;PPRC1;OTUD1;MECOM;CTGF;NUAK1;CLEC14A;MYCT1;DACH1;FAM117A;ABHD6;CDC7
CALM1	15	DOCK9;NLGN2;ROMO1;DENND2D;C10orf2;ILK;GNG12;CD2AP;MYL6;MEF2A;LRP1;ZYX;WDR1;HMG20B;YWHAH
KLHL31	15	GNAI1;KLHL25;ABCD2;DDR1;ZDHHC18;MRAS;PREB;GLI3;PPP2R5A;C19orf80;DUSP4;PHLPP1;YWHAG;THRSP;ARHGEF40
RPRD2	15	PRR12;ZBTB17;ZNF629;SPG7;MLLT1;PCDHGB7;SMCR8;PPP1R21;ZNF574;SF3A1;BCL9L;KLHL9;VPS13A;VPS13C;IFRD1
SCN4B	15	SERPINA5;RGS5;SELENBP1;TMEM74B;LHFP;CD4;COX4I2;AGAP2;ATP1A1;VIPR1;PJA1;FBLN2;CXCL14;CCDC85A;GDF10
PCYT2	15	SPHK2;ACACA;FCN2;ARHGEF6;ACSS2;INSIG1;BCAT2;GYS1;IZUMO4;ABAT;DCXR;LDHD;MVD;GCDH;DHCR24
SYBU	15	CDC37L1;LRCH1;SOCS2;TACC1;TSC22D3;GLUL;SLC29A2;MTUS1;FOXO1;TMEM204;FBXO31;PIK3R1;ITPKC;KLF9;LIFR
TEAD3	15	MRVI1;RAB9B;SYTL2;KCNQ4;TBX3;TPM2;PRKAA2;FHL3;TCEAL1;PRKG1;TRPC4;ITPR3;ZMIZ1;NFIX;RBPMS
STK38L	15	CNST;PDLIM7;RALGDS;VCL;PRKAG2;C10orf2;ILK;ITGA5;YWHAH;DMPK;IQCJ-SCHIP1;MYCT1;VASP;DAPK3;ZYX
LOXL2	15	LMCD1;ELN;COL4A1;MPP3;COL5A2;PISD;SPARC;COL4A2;OBSL1;ELOVL1;C16orf45;PHLDB1;UCP2;FADS3;LOX
GFRA2	15	DOK2;ADCY7;TBXAS1;DOCK2;CSF1R;C1QC;SELPLG;KCNQ1;CYBB;ITGAM;CYP2S1;CFP;AP1B1;IQGAP2;IL10RA
ACKR3	15	CD70;SCARA5;NTN1;CREB5;HAS1;SMAD3;IGFBP6;GPR133;MEDAG;ABL1;VASN;GFPT2;RGMA;FGF16;HTRA3
EBF3	15	NR3C2;ZNF521;EBF2;MED13L;PRR12;LIG4;ZFPM2;RUNX1T1;ZNF423;ZFHX4;CDKN1B;GLTSCR1L;ZMIZ1;MEOX2;FRMD3
CFL2	15	SHROOM3;PDLIM7;SRF;KCNH2;CCDC81;CYFIP2;MSRB1;ILK;CPNE6;PRKAG2;SMTN;RAB9B;WIPF3;HSD17B6;MYL9
SCNN1B	15	WSCD1;NAGS;PKP1;GPIHBP1;ENPP2;SMAD1;EFNA1;HID1;SCNN1G;USP13;ABLIM3;MYO5C;CLDN5;N4BP3;ROBO4
NYNRIN	15	DCHS1;ST3GAL2;RPS6KA2;FGD1;RAPGEF2;EPHB4;FAM168A;KIRREL;FAM109B;HDAC7;DOK4;NDST1;NOVA2;CLK1;GIMAP6
TIAM1	15	TLL1;ITGB4;MYRIP;CFI;PDIA5;LRRC1;ZNF385D;MTUS1;ERG;SCN1B;TMTC2;DARC;LIFR;TACR1;TSPAN7
PRSS36	15	RNASE1;STAB1;IRF5;NCF4;DOCK2;PLEK;CSF1R;PEPD;CYBB;ITGAM;ARHGAP4;CD200R1;MYO7A;SIGLEC1;FOLR2
EBI3	15	TNFSF13;AIF1;DOCK2;CD163;C1QB;C1QA;SLA;C1orf162;HMHA1;SLCO2B1;HCLS1;HCK;ARHGAP4;GPSM3;TRPM2
ZNF423	15	KCTD12;WNK1;HEG1;ZBTB7C;NINJ2;EML1;CD34;ARHGEF3;CYYR1;EBF3;EBF2;ZMIZ1;CD248;MEOX2;PTPRB
KCNA5	15	PRDM16;CSDC2;AKAP6;NTF3;TMEM51;USP2;AMIGO2;RBPMS2;RBM24;FOXL1;GABRA4;RERGL;HEY2;FOXC2;SORBS2
HK3	15	CYBB;PLCB2;NCKAP1L;VAMP8;VSIG4;C1QB;AIF1;RUNX2;DOK3;SPI1;S100A9;ITGAM;STXBP2;PSTPIP1;PTPN6
ETV6	15	ASB2;MESDC1;CAMK2G;TMEM61;SPG7;WNK2;SRRM2;MPP7;SHROOM3;FAT3;SNRNP25;SMTN;HMG20B;MAPK4;HSD17B6
MDFI	15	HADH;CNTD2;PPP1R1B;DTX1;C20orf24;ARHGEF6;GLIS1;G0S2;PDE3B;EGFL6;HOOK2;NNAT;GABRE;HTRA1;TMEM132C
SLC15A3	15	LIPA;ACP5;NCEH1;IGSF6;TREM2;CTSD;FGR;NPC2;CTSZ;TREML1;IFI30;APOBR;GRN;LCP1;TRPV2
SLC7A6	15	LRP1;PTPRS;NNMT;DGAT1;GRINA;PRMT7;YKT6;HOOK2;GLUL;AR;DCUN1D4;SMARCD2;C1S;IZUMO4;ABCD2
AQPEP	15	NHLRC3;APMAP;DTX1;PTPRF;PFKFB1;TLN2;CEPT1;KIAA0408;PDE3B;PNPLA2;GABRE;GART;PLIN1;COX14;GLCCI1
ITGB4	15	TLL1;SAMD14;NPDC1;PLCB4;AFAP1L2;ARHGEF3;ITGA6;C10orf128;SH3BP4;TIAM1;OLFM1;TMTC2;DARC;PCDH19;TSPAN7
RAPGEF2	15	ST3GAL2;ARHGEF12;SYNM;HEG1;TCF4;KIAA1671;NYNRIN;ADCY9;KIF26A;SH3BP4;SLC12A6;KDR;MFSD6;CDH5;VPS13C
PNMT	15	GAS2L1;SERPINA5;MFGE8;SPARCL1;CCDC93;LGI4;COL5A3;TSPAN7;MBNL1;STARD3;ARHGAP6;PLAT;MAN1A1;HRC;MMP28
ZNF692	15	TMEM88;ZNF248;H1F0;KLHL17;PNISR;ZNF362;EPHA2;ZBTB40;ARHGAP31;ERF;ZBTB46;SH2D3C;THOC1;ACAD11;FAM193B
PRKAG2	15	MYL6;FAXC;RASL11B;NPY5R;PRKAA2;CCDC81;TPM2;ILK;SHROOM3;YWHAH;CFL2;TMEM158;STK38L;HSD17B6;NEXN
PPT1	15	LCP1;NR3C2;KLF11;SPI1;GLIPR1;TPP1;NCEH1;KCNAB2;ARHGAP30;LAPTM5;CNPY3;NAGA;GRN;AP1B1;FUCA1
HRC	15	FBLN2;TIMP3;COL5A3;SELENBP1;CCR10;CD34;MASP1;MAN1A1;LGI4;RGS5;PNMT;VIPR1;SPARCL1;CENPV;KIFC3
MGAT4B	15	SLC39A13;EXTL3;LAMA4;PPAP2B;CSK;RRP9;ATP13A2;YKT6;KIFC3;FMNL3;PIK3R1;PPAN;DOK4;CXCL14;MID1IP1
TRIP10	15	MMP27;PDGFRA;LRP1;OMG;NOVA1;UAP1;SEMA3C;FSTL1;STXBP6;LTBP4;MEDAG;CORO2B;GFPT2;FBN1;EPS8L2
MYL2	14	TCAP;ACTN2;ACTA1;ANKRD1;MB;CKM;EEF1A2;TNNC1;KRT2;KLHL41;TNNI3;MYL1;COX6A2;MYLPF
PIP	14	EPCAM;AQP5;KIAA1324;FXYD3;KRT23;DCD;SCGB2A2;MUCL1;GJB6;C2orf82;SLC12A2;ATP6V1B1;C5orf46;ZG16B
JUN	14	CYR61;ITPRIP;UNC119B;JUNB;JUND;OTUD1;KLF6;PER1;KLF2;BHLHE40;RHOB;DUSP1;ZFP36;ATF3
PROX1	14	PRKCZ;STAB2;MMRN1;TFF3;CCL21;TBX1;GPM6A;RELN;KBTBD11;TSPAN5;RP11-451M19.3;FZD10;NTS;PKHD1L1
COL4A1	14	LOXL2;EFEMP2;TUSC3;MPP3;HSPG2;SPARC;IGFBP2;COL18A1;NID1;COL4A2;LAMB1;COL6A2;PXDN;IGFBP7
DUSP1	14	CSRNP1;SIK1;BTG2;FOS;JUNB;JUN;JUND;APOLD1;PER1;CYR61;MCL1;RHOB;ZFP36;FOXC1
MVD	14	NUDT8;DBI;PCYT2;DHCR7;SREBF2;SC5D;ELOVL5;EBP;ME1;INSIG1;ACLY;MVK;SQLE;DHCR24
IL6	14	RGS16;PTGS2;UGCG;ETS2;CDKN1A;CSF3;NFKBIZ;ZFP36;IER3;MYC;CH25H;RNF122;BCL3;ARL5B
MX1	14	IFI44L;IFIH1;IRF7;PARP9;CMPK2;HERC6;EPSTI1;OAS1;REC8;OAS2;ISG15;DDX60;DDX60L;IFIT2
SIGLEC6	14	RAB37;FCER1A;PIK3R6;CPA3;NDST2;KIT;CMA1;CTSG;MRGPRX2;TPSG1;CD22;SLC18A2;VWA5A;MS4A2
S100A6	14	ANXA1;ANXA5;SH3BGRL3;PLP2;PPL;LMNA;GPC1;CAPN2;S100A4;S100A10;LGALS1;CAPG;CD9;S100A3
ISG15	14	LY6E;IRF7;STAT1;CMPK2;HERC6;PARP12;EPSTI1;MX1;IFI44L;B2M;OAS2;BST2;IFIT2;IFI27
NFKBIZ	14	RGS16;CCNL1;MAP3K8;FOS;SELE;FOSB;CSF3;IL6;ZFP36;TRIB1;MYC;IER3;ATF3;MCL1
MYO5C	14	LRCH1;PRKCH;SDPR;GAS2L1;MYRIP;MECOM;SMAD1;ITGA6;HID1;DOCK9;SCNN1B;LRRC8A;CLDN5;FBXO31
OGT	14	DDX17;PHYKPL;CTTN;MZF1;ZRANB2;PNISR;FUBP1;WDR27;SRSF11;SLC25A27;ZKSCAN8;EFCAB13;DMTF1;LUC7L3
FAM166B	14	SAT1;SELENBP1;CLMN;RASSF4;GYS1;DGAT1;GYS2;C19orf80;ELOVL5;CTIF;ABCD2;WDR66;THRSP;ABHD5
NDUFA4L2	14	RPS6KA2;WDR54;GALK1;FAM162B;ARHGDIB;PLOD1;TESC;IGFBP2;COX4I2;TMEM204;ABCC5;NAGS;NOTCH3;LZTS1
MBD3	14	SHFM1;CCDC102A;PELI3;CIRBP;ZNF219;RNPEPL1;BAD;POLR2A;SF3A1;CREBL2;EIF2S1;ZNF358;ODC1;ATP5E
NFKBIA	14	CUTC;SELE;TSC22D3;BIRC3;RASSF4;TNFAIP3;ITPKC;TNIP1;ZNF697;ICAM1;IER5;SPSB1;SLCO4A1;KLF9
PCOLCE	14	COL5A2;PDGFRA;OLFML3;FKBP10;SELENBP1;CCDC80;MRC2;CNTNAP1;CNTN3;COL1A2;SERPINF2;C1R;THY1;COL6A3
HTRA3	14	LGR4;UAP1;HAS1;TPST1;NPR1;SCARA5;ACKR3;TPPP3;ADA;MEDAG;MMP27;PI16;GFPT2;PROCR
GUCY1B3	14	HVCN1;LINGO1;EFHD1;RCAN2;SORBS2;NOTCH3;TBX2;GUCY1A3;TEK;LSR;FHL5;EDNRA;CYYR1;JAG1
FUBP1	14	VAMP1;PREPL;ZRANB2;PNISR;PHIP;ZDHHC17;MASP2;DMTF1;SGK494;OGT;ZNF512;ATAT1;BTAF1;LUC7L3
PLK1	14	MKI67;CCNB2;TPX2;CCNA2;BUB1B;CEP55;H2AFX;CDCA3;FOXM1;TK1;NUSAP1;IQGAP3;KIF2C;TOP2A
HCST	14	RPS6KA1;FERMT3;ITGB2;RAC2;FAIM3;TYROBP;CD37;LAPTM5;CTSK;LCP1;LY86;C19orf38;CYBA;MSR1
PTK2	14	SLC44A2;LINGO1;NRGN;FRZB;RCAN2;CD93;NOTCH3;ARL15;ESAM;FHL5;ARHGDIB;GIPC2;JAG1;CRIP2
REM1	14	IGFBP2;LGI4;PACSIN2;FBXL3;CHSY3;INPP4B;CD4;SPRY2;LPPR4;ARHGDIB;DACH1;RCSD1;NOTCH3;FRMD3
CTGF	14	NEDD9;CYR61;LRRC8C;LATS2;MECOM;ZBTB18;DNAJB4;ELF1;SPARC;CDYL2;EDN1;USP31;BMX;CRIM1
SOX17	14	CHST12;ITPRIP;CDKN1A;S1PR1;CSRNP1;C8orf4;RNF122;SPRY1;CASKIN2;KLF2;FOSL2;GRASP;SIK1;APOLD1
SNX21	14	SEMA3C;DLGAP4;CDC42EP2;UAP1;METRNL;SMAD3;NPC2;IGFBP6;TTC7A;ADA;ABL1;DBN1;MEDAG;NUMBL
GJB2	14	SPINT1;RAB25;RHCG;RHOV;GJB6;CCDC64B;TFAP2A;ESRP1;PVRL4;EPCAM;FAM84A;SERPINB5;S100A14;LYPD3
PARVG	14	CACNA1H;CD53;ITGB2;TFEC;TYROBP;CCDC88B;TCEAL1;FGR;CD37;PIK3R5;STXBP2;PTPRC;KCNAB2;LMOD1
CXCR4	14	SMAP2;KLRB1;ITK;RGS1;AMICA1;TRAT1;LY9;RUNX3;PRDM1;CD8A;CYTIP;CD48;CD3E;DUSP2
ZNF865	14	CEBPA;ZNF628;EVA1B;COMTD1;NR2F6;TRAPPC5;SCAND1;TMEM160;IRF2BP1;FBXL15;RNF38;FADD;CCDC85B;ZNF428
USP2	14	LIPA;TOB1;NR4A3;CTSD;TMEM51;RBM24;DCSTAMP;CD300LB;SLAMF9;PIP5K1B;GPR20;KCNA5;LRRC10B;IL24
ZWINT	14	CENPM;NUSAP1;E2F1;BUB1B;CEP55;TPX2;PKMYT1;CDCA5;TK1;MYBL2;TCF19;TOP2A;ASF1B;IQGAP3
TMEM255B	14	BACE2;CFI;TESC;PDIA5;ERG;RELL1;EFNA1;ZNF385D;CPLX1;HAPLN3;ADM5;CMIP;ABCD4;GPR68
ANKRD37	14	EGLN3;NEDD9;MLLT4;PPP1R3C;BHLHE40;CDKN1B;SMAD7;CDC42EP3;MTFP1;ARRDC3;ALDOA;HES1;KDM3A;SERPINE1
ACSS3	14	CD52;NHLRC3;APMAP;TM7SF2;ACVR1C;ALDH1L1;NCEH1;FPGS;TTC36;OBSL1;S100A4;GART;PMM1;TMEM42
PLTP	14	CLEC10A;MARCO;CLEC4G;CD163;C1QC;STX4;C1QA;NEURL2;DCSTAMP;SCN1B;SLCO2B1;F13A1;AIF1;FOLR2
PIEZO2	14	FAM19A5;AUTS2;GALNT13;PRRG3;NTN1;FNDC1;QPCT;TFF3;STON2;WNT9A;RP11-451M19.3;DPP4;MCOLN3;COL6A6
RUNX1	14	TJP2;SBNO2;WDR1;NNMT;CCDC71L;EFNA5;PLAU;IFI16;ZNF436;NOD1;TMEM2;DACT1;BCL3;ASAP3
BST2	14	LY6E;PSME1;CMPK2;ODF3B;DSC2;EPSTI1;CA4;UBE2L6;B2M;HERC5;PSMB9;ISG15;NRG2;IFI27
APBB1IP	14	GPAM;SOS1;ADORA1;EFNA5;EHBP1;ZNF438;ABCD2;ARHGAP20;C19orf80;THRSP;EBF1;SREBF1;TPRG1;AR
ANTXR2	14	NR3C1;ARID5B;SLC39A14;ADCY3;CPEB4;DDR1;VCAN;ZNF217;GLUL;GBE1;DAB2;PLAGL1;PRDM8;CAV1
RAMP2	14	HSPA12B;BACE2;TEK;HECW2;SLC9A3R2;WNK1;CHST7;CASKIN2;ADAM15;ANGPTL1;PARM1;THBD;CD248;ST6GALNAC1
LUC7L	14	NR3C2;UAP1;ZNF618;PSME4;SRRM2;PRR12;IGIP;SGSM3;SF3A1;FAM117A;GLMN;CLK1;TRIM44;SGSM2
MKL1	14	KCTD3;COL5A2;SLC38A2;TLDC2;CUTC;AHDC1;COX4I2;AKAP13;ARHGAP10;ELF1;MBNL1;ARHGAP6;MAN1A1;PACSIN2
PKN3	14	HID1;TEK;HEG1;NOVA2;HSPA12B;CRIP2;PODXL;ELK3;PCGF2;ADAM15;ESAM;PTPRB;CDH5;PPP1R13B
NHSL1	14	TRIO;ADD3;ZFHX4;WNT10B;PAMR1;FNDC1;FBN1;DBN1;GPR133;CDS1;CD70;DACT2;FGF16;SPSB4
ATP13A3	14	PHF15;MAP4K3;ACADVL;ZNF629;DOCK3;PSME4;TMED5;DLL4;IFRD1;F13A1;AVPI1;GIMAP5;SPOCD1;MFAP3
ABI3BP	14	DCN;MRC2;GALNT13;PAM;VCAN;SFRP4;COL14A1;ECM1;FBN1;ANGPTL5;ITGA11;COL6A3;PCOLCE2;GFPT2
AMIGO2	14	MYOZ1;LTBP1;RASSF3;SORBS2;RERGL;GUCY1A3;WFDC1;FOXL1;P2RX1;GABRA4;ITIH3;KCNA5;HEY2;HTR1B
SKAP1	14	RAB37;KLRB1;ITK;CPA3;TRAT1;CD69;CST7;RUNX3;CD6;ZAP70;GZMM;SNX20;IKZF1;CD3E
AURKB	14	MKI67;CCNB2;CENPM;MYBL2;CCNA2;BUB1B;H2AFX;TPX2;CDCA3;TYMS;IQGAP3;TOP2A;ASF1B;BCAS1
NEURL1B	14	DOLK;PRKCH;RPS6KA2;CHST15;HIC1;KIRREL;PEAR1;CD93;KIF26A;CYTL1;EBF2;PRKAR1B;SH2D3C;MFNG
TRIM44	14	SMCR8;CTD-2369P2.12;LUC7L;EIF4G1;OSER1;LSMEM1;ITGA5;NR2C2;C15orf38;SOCS7;CXCR5;CLK1;FLNA;HSD17B4
KIRREL	14	NEURL1B;EXTL3;FGD1;RARG;ZNF740;NDST1;ADCY3;NYNRIN;HPS6;MGAT3;FAM129B;CBX6;GIMAP6;LDOC1L
CCRL2	14	B3GNT5;SIK1;MGAT1;TSC22D1;KALRN;SNRK;CA4;HBEGF;ADRB2;SCN4A;PRR26;ABHD6;APOLD1;SNED1
MAOB	14	ANKRD53;FHOD3;ARHGEF6;DDR1;TSPAN15;RBPMS;CRLS1;UTRN;PHLDA3;IFNGR2;SORBS1;ESYT1;GABRE;PHYHIP
SLC27A2	14	ORMDL3;P2RX6;TM7SF2;ACVR1C;MCM6;PMM1;CORO1C;NAALAD2;TTC36;PTCHD3;KIAA1239;NDRG4;AGPAT9;EPDR1
NOTCH1	14	SOX18;IMP3;RBM5;CHST15;GATA2;EPHA2;IRF2BPL;KIF26A;SH2D3C;LYL1;BCL9L;CBX4;SKI;CBX2
EXTL3	14	SLCO4A1;AMOTL1;CSK;UNC119B;KIRREL;SDC3;CBX6;YKT6;RHOBTB2;PIK3R1;MGAT4B;ZNF853;PPP1R16B;RGP1
DEF6	14	PLCB2;TSPAN33;AMICA1;ARHGAP4;CYTH4;TRAF3IP3;CARD9;PTPRC;ZAP70;DENND1C;LIMD2;SNX20;IKZF1;CCDC88B
CKAP4	14	SLC39A13;FGD1;FKBP10;MAGED1;P4HB;EFEMP2;CDR2L;CHPF2;COL1A2;SLC5A6;COL1A1;PYCR1;TXNDC5;SEC61A1
SH2B2	14	SBNO2;LMNB1;RHOU;TBC1D30;IFI16;SPNS2;ATP11C;FAM110D;DARC;ADM5;TCTEX1D1;DUSP23;ABCD4;GPR68
FGD3	14	SMAP2;IL10RA;NCF4;ALOX5;SELPLG;CD163;PTPRC;CFP;TLR5;HMHA1;SNX20;IKZF1;AMICA1;TRPM2
CPD	14	PDGFB;MYRIP;ENG;ENPP2;FLI1;ELTD1;HOXB7;PDE9A;RPS6KA2;ROBO4;GIMAP4;SPARCL1;CCDC85A;DSC2
PIK3R6	14	RAC2;RGS13;CD22;MRGPRX2;CTSG;WDFY4;CPA3;FCER1A;SIGLEC6;KIT;MS4A2;HPGDS;BTK;CD1C
SERPINA5	14	ELANE;SCN4B;WASF3;FMNL1;MASP1;FBXL7;RASSF4;CILP;ANGPTL5;PNMT;FBLN2;GDF10;ABCC1;ABHD5
GPC4	14	LIPA;CHML;ASPHD1;CALM3;DHRS9;ALOX5;CTSD;CYP27A1;PLA2G7;DCSTAMP;MAPK13;SLC1A4;SPOCD1;MATK
LSR	14	TEK;HEG1;ELK3;CCM2L;AVPR2;CYYR1;HSPA12B;ARHGAP31;CLEC14A;GUCY1B3;JAG2;GIPC2;PTPRK;CRIP2
CAP2	14	ASB2;MYOM1;C20orf24;CASQ2;PDLIM3;MPP7;TPM2;JPH2;GLI3;PALLD;MYOCD;REEP1;SLC8A1;HPD
KIF2C	14	MKI67;TPX2;ANLN;CCNB2;CDCA5;NUF2;PLK1;SPAG5;PKMYT1;CDCA3;FOXM1;TK1;BUB1B;IQGAP3
ABI3	14	CD74;HLA-DRA;JAG2;RASIP1;CCM2L;HYAL2;AVPR2;WNK1;ETS2;ELK3;SH2D3C;GRASP;SLC9A3R2;CCND3
TNFSF13	14	TBXAS1;DOCK2;C1QC;MPPED2;CSF1R;C1QA;KCNQ1;CD4;SLCO2B1;MYOC;HCK;MYO7A;EBI3;FOLR2
WIPF3	14	SLC20A2;TPM2;HSPB3;TMEM61;RASSF3;RAMP1;NCS1;PCDH7;JPH2;P2RX1;CFL2;GATA6;HSD17B6;RASL11B
PRKAA2	14	MRVI1;SYNM;CYFIP2;HSPB3;ZBTB7C;ARHGEF9;PRKAG2;PALLD;TEAD3;TCEAL1;RAB9B;MYOCD;REEP1;KCNH2
GLA	14	DMXL2;EPM2A;HEXB;TFRC;TFEC;ALCAM;GPR183;C20orf24;DCSTAMP;RABGGTA;MYO9B;DOCK3;GRN;FBP1
MFSD6	14	AIF1L;KIAA1217;B3GNT2;WWC3;TSPAN13;DSC2;ITGA6;TMCC3;ARL15;CTTNBP2NL;RAPGEF2;CYYR1;TCN2;CCDC85A
GLIPR1	14	C1orf162;NCKAP1L;IL10RA;SLC2A9;MFSD1;PPT1;CD86;ARHGAP30;TYROBP;SPI1;SH3BGRL;LCP1;WDR1;MSR1
IRF2BP2	14	C15orf39;KLHL26;ARRDC2;TSC22D3;SFMBT2;SPEN;PER1;BRD8;FOXC1;PIK3R1;ELMSAN1;ADAMTS18;FRY;KLF9
KIFC3	14	FBLN2;KIAA0922;ALDH4A1;FNDC4;ARHGEF6;PDE1B;OLFML3;DERL1;FABP4;MGAT4B;CLU;AMOT;HRC;ABHD5
CD200R1	14	RNASE1;LYVE1;RGL1;CPA3;SELPLG;CYBB;ALOX5AP;COLEC12;PRSS36;LGI2;F13A1;SIGLEC1;FOLR2;LPAR5
FBXL7	14	DRAM2;SERPINA5;ZFPM2;ATP9A;OLFML3;RASSF4;APBB2;EVC2;PARD3B;ELF1;FBLN2;ABCC1;FBLN5;RIMS3
LTBP4	14	DCN;FAM180B;EMILIN1;NOVA1;FMNL1;PCOLCE2;ITM2A;ITGAM;VIT;EMP1;TRIP10;MBNL3;CFD;SPTBN1
FAM46C	14	RASGRP1;CD3E;TAGAP;GZMM;SH2D1A;CD27;LY9;CD69;GZMK;SH2D2A;CD2;CD8A;IGJ;DUSP2
RGMA	14	DCN;RAB3IL1;AUTS2;SCARA5;EFNA5;ACKR3;CILP;ANGPTL5;VIT;C11orf53;MMP27;PDGFRL;NOVA1;ABCA8
GNG12	14	AKAP2;WDR1;CALM1;RASSF3;ITGAV;TRAM1;CSN1S1;LNPEP;FLNB;TMEM47;CALD1;SLC1A1;ZYX;TAGLN
TPST1	14	DCN;NPR1;MRC2;PRRX2;SFRP4;VCAN;FBN1;CILP;COL1A2;ADA;GFPT2;FSTL1;PROCR;HTRA3
HTRA1	14	MDFI;APMAP;TMEM139;ANXA5;TIMP2;DNAH9;MYO1E;SLC16A2;EGFL6;CLPTM1L;GOLM1;MXRA8;UCHL1;LUM
MUCL1	13	KRT77;AQP5;KIAA1324;KRT23;DCD;SCGB2A2;RHOV;CALML5;CCDC64B;C2orf82;PIP;C5orf46;COL17A1
MYL1	13	TCAP;ACTN2;ACTA1;MYBPC1;MB;CKM;KLHL41;TNNI2;MYLPF;TNNC2;MYL2;COX6A2;TNNC1
ACTA1	13	TCAP;TNNC2;MB;CKM;EEF1A2;KLHL41;MYL2;MYLPF;MYBPC1;MYL1;TNNI2;TRIM54;COX6A2
HBEGF	13	CNST;PELI1;HLX;NR4A2;C8orf4;SIDT2;DLL1;SPRY1;FOSL2;ITPRIP;CCRL2;RNF122;SIK1
INSIG1	13	CYP4F22;KCNE1;ACACA;ADIPOR2;FADS2;PCYT2;DHCR7;ELOVL5;MVD;ACLY;MVK;SQLE;DHCR24
BHLHE40	13	EGLN3;SERTAD3;PPP1R3C;ANKRD37;GADD45B;JUNB;JUN;C15orf39;MTFP1;DLL4;ARRDC3;HES1;LRRC32
LRRC10B	13	HEYL;LGR6;TOB1;ZBTB7C;PIP5K1B;USP2;TBX2;SSTR2;PTP4A3;GPR20;SORBS2;HES4;GPRC5C
COL6A1	13	PDGFRB;COL16A1;CALU;COL5A2;FAT1;COL5A1;ANPEP;DLGAP4;COL1A1;COL6A3;COL6A2;LGALS1;CPVL
DAB1	13	ITGA8;RSPO3;SYNM;STAB2;NTS;PCP4;MCHR1;COL4A6;PCP4L1;CAMK2B;KCNS2;LGI3;SLC8A1
KLHL41	13	ACTN2;ACTA1;TNNC2;MB;CKM;CMYA5;MYL2;TNNC1;MYBPC1;MYL1;TNNI2;EEF1A2;MYLPF
CFD	13	LAMA1;ELANE;LTBP4;SOD3;FXYD1;ECM2;MAN1A1;SNRNP25;NPY2R;MBNL3;CXCL14;SPTBN1;GSN
PGBD5	13	DNASE2B;ASPHD1;SDS;BIRC7;DOCK3;NR1H3;PPAPDC1A;CYP27A1;KMO;VMO1;CAMK2B;IFITM10;CADM1
SH2D2A	13	SH2D1A;RASGRP1;ITK;RUNX3;TRAT1;ITGA4;CD69;FAM46C;CD5;SPOCK2;CD8A;CST7;DUSP2
THEMIS2	13	RAB20;PELI1;IL10RA;TACC1;CD86;C1orf162;ZMYND15;ANGPTL1;SRGN;SAMSN1;WAS;SLA;PARM1
RANBP3L	13	RAB8B;NEK7;MAP1B;FAM198B;DMD;SLC38A2;PPP1CB;ARHGAP10;PCDH9;MBNL2;ANGPT1;MAN1A1;ANGPT4
CLDN5	13	SDPR;SIK1;CEBPD;S1PR1;SCNN1G;SRGN;INHBB;DLL4;KANK3;MYO5C;TSPAN6;APOLD1;SCNN1B
RHCG	13	KRT4;CCDC64B;LYPD3;GJB2;RHOV;GJB6;SFN;ESRP1;KRT13;CRNN;EPCAM;LAD1;S100A14
COX4I2	13	TMEM74B;TESC;SOX13;MKL1;NOTCH3;AGRN;RGS5;AGAP2;ARHGDIB;ATP1A1;NDUFA4L2;SCN4B;PACSIN2
ARHGEF26	13	YPEL5;EGFLAM;PLAGL1;SESN1;ATP10A;DDR1;BBS10;CREB3L1;IFNGR2;KIAA1239;UST;ULK1;GNAI1
PIK3R3	13	EFNB2;JAG2;RASIP1;EPHB4;HYAL2;TNFAIP1;KIAA1211L;DLL1;SPNS2;CASKIN2;GRASP;THBD;ELFN1
ELFN1	13	SOX18;HEG1;EPHB4;SLC9A3R2;SMAD6;CDR2L;ID1;ARHGAP31;PIK3R3;PPP1R13B;ZBTB46;JAG2;CASKIN2
CCNL1	13	CHD1;RGS16;PDGFB;UGCG;PPRC1;SRSF7;NFKBIZ;ZFP36;SLC25A27;SLC25A25;MYC;ARL5B;TRIB1
HOOK2	13	MDFI;G0S2;LRP1;PTPRF;SLC7A6;DGAT2;PRKCD;PDE3B;PNPLA2;SREBF1;AGPAT2;SLC5A6;PLIN1
DLL1	13	RASIP1;EPB41L4A-AS2;SIK1;SNRK;WNK1;HBEGF;ADRB2;PIK3R3;GRASP;ITPRIP;THBD;SNAI1;APOLD1
SELENBP1	13	EPHX1;CUTC;FAM166B;TMEM74B;ECM2;YKT6;MAN1A1;LGALS3BP;NTRK2;PCOLCE;SCN4B;CXCL14;HRC
ST6GAL1	13	PRKCH;ABCG2;LRRC8A;MYRIP;ELTD1;ELK3;AKT3;TMEM204;TSPAN7;GIMAP4;MFNG;GIMAP6;LRCH1
HEY1	13	EFNB2;XPR1;SLC6A6;PREX1;SLC9A3R2;SMAD6;WNK1;MCC;CCDC68;ID1;EML1;CMTM8;TMCC3
MAP1A	13	MMP14;ADAMTSL4;TTC7A;RARG;FAM180A;ISLR;IRF4;ECM1;PPL;ANK2;TRAM2;WNT9A;COL1A1
ZZEF1	13	SMC1A;FAM76B;MED13L;PHIP;NR2C2;GANC;SLC12A6;MYSM1;BAZ2A;ATXN7;PPP1R18;MTMR3;CREBBP
ENTPD2	13	LGR6;EMILIN3;SOX10;COL9A3;NRXN1;SOX8;ANK3;GFRA3;L1CAM;CLDN1;CADM4;CMTM5;CADM1
ALDH2	13	PPP1R1A;TUSC5;PLA2G16;PPP1R1B;TM7SF2;PTPRF;ACADL;PC;GPD1;C12orf39;GLYAT;NAT8L;PLIN1
SAMSN1	13	PTPN22;CD53;CYTIP;SYTL3;GPR183;IL1R2;THEMIS2;PTPRC;FES;SRGN;SNX20;WAS;SLA
PRDM16	13	CSDC2;KCNA5;B4GALNT1;FOXD3;LGR6;HTR1B;PTP4A3;SPEG;ITIH3;SORBS2;SOX6;CARNS1;BRSK2
EFNA5	13	RAB3IL1;LRP1;APBB1IP;WDR1;SMAD3;RUNX1;RHOBTB3;EBF1;AUTS2;ASAP3;FAM134B;HMG20B;RGMA
CD27	13	CD3E;MZB1;RLTPR;LY9;GZMK;TRAF3IP3;LCK;CD2;MS4A1;FAM46C;CD3D;IGJ;CD79A
HTR1B	13	PRDM16;FAM181B;AKAP6;AMIGO2;LTBP1;CDK18;FOXL1;P2RX1;GABRA4;ITIH3;SORBS2;HEY2;RIMS3
GYG2	13	GPD1;PLA2G16;ALDH1L1;MARC1;PTPRF;LPL;KDM6A;AGPAT2;RBP4;REEP6;NAT8L;KCNIP2;PLIN1
ADD3	13	ADAMTS5;TRIO;FAM19A5;AUTS2;SCARA5;NHSL1;GLI3;ARHGAP32;EPB41L2;GAS1;ITPR3;LPAR1;ABCA8
KAT6A	13	MED13L;S1PR1;SOX13;CBFA2T3;ATF7IP;DENND3;UTRN;POLR2A;CREBBP;ATP1A1;TCF12;ELF1;CCDC85A
ZNF697	13	KLF11;EFNB1;IL4R;PDE1B;NFKBIA;ITPKC;GNAZ;CA4;NAV1;FABP4;PDK4;SCN4A;GJA5
APBB2	13	QKI;LAMA3;PREX2;PIK3R1;WASF3;CCND1;PRKCE;FBXL7;MED13L;PARD3B;ANGPT1;CD248;NCOR2
LAMA3	13	ANKRD29;AKAP13;ATP1A1;TPO;TACC1;CDH24;APBB2;IKBKB;ABCB1;LCN10;PARM1;ST6GALNAC1;LIFR
LGI4	13	TRNP1;EFHD1;TIMP3;RRAD;REM1;FXYD1;SLC7A2;CYP4B1;RRAS;GATSL3;PNMT;HRC;PACSIN2
TBC1D8	13	LIPA;NCEH1;CCDC88A;ALCAM;RABGGTA;TCIRG1;PLA2G7;DCSTAMP;MYO9B;SLAMF9;DENND4C;DOCK3;SPOCD1
PPP1R16B	13	AMOTL1;PPM1F;AIF1L;FAM168A;UNC119B;ACSS2;EXTL3;IGF1R;YKT6;PDE2A;PTGER2;ZNF275;GIMAP6
SNCG	13	BAG3;ALDH4A1;CCDC107;EGFL6;MSC;ASPH;RRAS;ADIRF;COX7A1;CLU;PACSIN2;UCHL1;P2RX6
C9orf16	13	LIPA;EPHB6;ISOC2;CIRBP;NDST2;ZNF219;SCAND1;BAD;ALCAM;SH3BGRL;C1orf122;ZNF358;HMG20B
SLC25A27	13	CCNL1;ZRANB2;OGT;PPWD1;HOXB7;ZMAT1;GLTPD1;GABBR1;GABRE;ARMC7;MTERFD3;ECHDC2;ANKRD10
COL18A1	13	NCK2;SLC7A2;MYO1B;SPARCL1;IGFBP2;RCSD1;IGFBP7;COL4A1;FHL5;HEPH;PACSIN2;CLEC11A;COL4A2
KLF2	13	CEBPA;H1FX;SOD3;CDKN1B;TSC22D3;PLK2;JUN;SOX17;TMEM160;PER1;GRASP;RHOB;FRY
BCL9L	13	NFIC;FHOD1;AHDC1;HDAC7;PHF15;NOTCH1;PRR12;POLR2A;SMARCD2;IFRD2;SUFU;BCORL1;RPRD2
NME3	13	PTH1R;SCAND1;CNNM3;ALDH4A1;TMEM259;RRAS;BAD;BRD8;C9orf142;MBNL1;MAP1LC3A;C1orf122;KIFC2
MMP14	13	PDGFRB;CTSK;VDR;VASN;PCNXL2;MAP1A;THBS2;CRYM;TRAM2;SPOCK1;ANTXR1;FRMD6;MMP2
ASPN	13	SFRP2;LOXL1;MRC2;LTBP2;SFRP4;COL14A1;FNDC1;PAM;PLXDC2;ITGA11;COL1A2;PI16;LUM
DNMBP	13	SEMA3C;CALHM2;CD34;KLHL29;ECM1;FSTL1;EMP3;TTC7A;CORO2B;S100A10;FBN1;FGF16;ANPEP
PTPN3	13	ANKRD53;TDRKH;FAM198B;GAS2L1;ORMDL3;ACVR1C;GLIS1;RORC;MAP3K5;EGFL6;CISH;KIAA1239;AGPAT9
CCDC88B	13	PLCB2;DEF6;NCF4;DOCK2;RNASE6;ARHGAP4;PIK3R5;STXBP2;ARHGAP9;DENND1C;IKZF1;PARVG;RNF166
HPD	13	HAPLN2;C20orf24;KCNH2;FILIP1;SLC7A4;SLC24A3;CAP2;JPH2;EGFL6;PALLD;P2RX6;TMEM132C;MYL9
PRUNE2	13	PDLIM3;MYH11;SYNM;CNN1;ACTG2;ARHGEF9;CYFIP2;TPM2;PDLIM7;REEP1;FLNA;DES;HSD17B6
HID1	13	LNX1;PKN3;CARD10;PEAR1;ELK3;PDE9A;PTPRB;RAPGEF3;MYO5C;ARID4A;AVPR2;GLTPD1;SCNN1B
DNAH9	13	PAPSS1;APMAP;PPP1R1B;ACVR1C;GLIS1;C6;PEX19;EGFL6;ANG;TTC36;CRLS1;KIAA0922;HTRA1
AMICA1	13	FCN1;AOAH;DEF6;FGD3;RNASE6;C11orf21;RGS18;CCR2;GAPT;CXCR4;PTPRC;SNX20;CD1C
EPS8L2	13	SEMA3C;GALNT12;ISLR;ECM1;PPL;ASAP3;TTC7A;S100A10;TRIP10;ITPR3;GFPT2;ACAP3;ITGBL1
PPP1R12A	13	DBNDD2;MYH11;PDLIM7;CNN1;WDR1;CCDC88A;TCEAL1;TPM2;RBM24;MYOCD;CSRP1;DGKG;PDE5A
TMC8	13	CD8A;ANO9;IKZF1;LCK;ARHGAP4;CD6;DENND1C;ZAP70;TRAF3IP3;LIMD2;CD3D;CD3E;ITK
GNAI1	13	YPEL5;GPAM;DDR1;KLHL31;CALCRL;ARHGEF26;IRS2;ADRB2;ULK1;IFNGR2;RGS3;KIAA1239;ABHD5
MTUS1	13	DOCK9;MECOM;RPGR;S1PR1;MAP3K6;LRRC1;TIAM1;ITPKC;LRCH1;SYBU;EDN1;FRY;KLF9
CLU	13	MVP;CUTC;PDE1B;CCDC80;CHRDL1;ECM2;CTSF;LGALS3BP;SNCG;FMOD;C1S;FBLN2;KIFC3
TRNP1	13	CACNA1H;CNR1;EFHD1;TIMP3;LINGO1;GRK5;OSR2;NOTCH3;LGI4;NDRG2;ANGPT1;LMOD1;GPRC5C
GBE1	13	DDR1;ANTXR2;RTN4;PSMD14;ADCY3;BRPF3;ENO1;ENO2;ELOVL5;C19orf80;ALDOA;FADS3;CAV1
PCED1B	13	ARHGEF6;PDE1B;RBPMS;FABP4;SPARC;DDO;LNPEP;FBLN2;COL6A3;KIAA0922;ABCC1;HSDL2;ABHD5
SELM	13	LRRC4B;EMILIN1;MSRB1;ADRA2C;SCAND1;ITIH1;P2RX1;BTC;GATA6;ITIH3;PDE4D;HSD17B6;RIMS3
SNED1	13	MVP;FAM65C;CCDC88A;TCEA3;CCRL2;MYL6;CSRP1;IFI16;CHRD;C1S;C1R;NLGN2;SMAD3
PICALM	13	LRCH1;ATP10A;MYH9;VCL;INPP4B;ROCK2;MYL6;STX12;ZCCHC24;YIF1A;PPP1R14A;DAPK3;TAGLN
FYB	13	SERPINA1;SPI1;TLR8;MYO1F;POU2F2;PDE8A;SASH3;PTPRC;WAS;HCK;LYN;IKZF1;GPSM3
BAD	13	C9orf16;SHFM1;C1orf122;MBD3;NME3;SLC38A2;ZNF219;ITGAV;TCIRG1;C9orf142;JOSD2;ZNF358;SIGIRR
CLMN	13	EPHX1;PDHA1;NSDHL;PRRT4;FAM166B;DENND3;ELOVL5;C19orf80;SLC29A2;ARHGAP10;ACLY;MYD88;PACSIN2
DENND2D	13	CEPT1;DRAM2;GAS2L1;ACVR1C;MFGE8;CALM1;SPTAN1;EPB41L4B;COL5A3;TIMP3;CD248;C6;TMEM132C
LTBP1	13	AKAP6;AMIGO2;INHBA;ACTC1;PDE3A;SULF1;NPNT;WFDC1;P2RX1;ITIH3;SORBS2;HEY2;HTR1B
SH3RF1	13	NEDD9;ZBTB16;LONRF1;TSC22D3;DENND3;PER1;TRAM2;ARRDC2;FOSL2;ELF1;BAIAP2;SLCO4A1;ARHGAP10
THSD7A	13	TLL1;DUSP23;PLCB4;CFI;TSHZ2;MKL2;CYYR1;ARL15;FAM13C;ABCC4;ADM5;CMIP;AGFG2
RNF38	13	RBM5;TRMT13;ZNF865;ADAMTS9;FCHO2;CD2AP;TRAM1;ELK3;GLTPD1;DYRK1B;DEDD2;CCDC85A;GNA13
CD74	12	HLA-DPB1;HLA-DRA;IL18BP;ODF3B;IFITM1;B2M;TSPAN7;PSMB9;ABI3;HLA-DPA1;HLA-DMB;HLA-DMA
COL3A1	12	LOXL1;CCDC80;FSTL1;COL5A2;SPARC;COL5A1;COL1A2;COL1A1;LOX;COL6A2;PPIC;THY1
GIMAP7	12	TGFBR2;IFITM1;HHEX;FLI1;HOXB7;FRAT2;GIMAP8;ZNF792;PSMB8;GIMAP4;GIMAP5;GIMAP6
S100A10	12	ANXA1;SEMA3C;ANXA5;SH3BGRL3;TPPP3;STARD9;EMP3;SRPX2;EPS8L2;S100A6;DNMBP;LMNA
TNFAIP3	12	CDC42EP3;SELE;NFKBIA;BIRC3;IER3;UBD;ZFP36;MTFP1;ICAM1;FOSL2;SERPINE1;ARL5B
WNT10B	12	WSCD2;CD70;FGF16;WNT2;NHSL1;FBN1;CDS1;GFPT2;SPSB4;TRIO;ZNF385B;DACT2
S100A4	12	MAP1B;NRM;HCFC1R1;ACSS3;CLEC3B;LDB1;STARD9;ANPEP;S100A6;ODC1;S100A3;EMP3
NTS	12	RSPO3;PCSK1N;KCNS2;STAB2;DES;MCHR1;PCP4L1;FZD10;BCHE;DAB1;PROX1;PKHD1L1
PROCR	12	LGR4;TPST1;CCDC109B;UAP1;VCAN;PCOLCE2;EDEM2;GPR133;TGFBI;GFPT2;PDGFRL;HTRA3
TOB1	12	HEYL;LGR6;RASD1;NR4A3;USP2;NGF;NRARP;SOX9;GPR20;HEY2;LRRC10B;GPRC5C
LY6E	12	AGRN;IFIH1;CMPK2;IFITM1;EPSTI1;IFI44L;UBE2L6;OAS2;ISG15;PSMB9;BST2;IFI27
NAB2	12	ANKRD13D;DDIT3;PELI1;SESN1;TACC1;CBL;JRKL;HOXA9;KLF9;IER5L;PHF23;ARID5B
PODN	12	PDGFRL;PPAP2B;ADCY3;DKK2;NINJ2;DCLK1;OGN;CREB3L1;STON2;IGFBP5;SLC1A7;FGFR1
OLFM1	12	NPDC1;ITGB4;SPNS2;PLAT;ETS2;TSPAN1;SCN1B;TSPAN7;DARC;DUSP23;SLCO4A1;TACR1
TYMS	12	MKI67;CENPM;NUSAP1;CEP55;TPX2;PKMYT1;AURKB;CDCA5;TK1;MYBL2;ASF1B;TOP2A
CREBBP	12	SMC1A;SMCR8;IGIP;MED13L;ZNF618;NR2C2;SLC12A6;SF3A1;KAT6B;KAT6A;NFIX;ZZEF1
TUSC5	12	G0S2;LIPE;PTPRF;PLA2G16;ALDH2;PNPLA2;GPD1;AGPAT2;ATP9A;MESP1;KCNIP2;PLIN1
MPP1	12	NPL;TFEC;NCF2;TYROBP;PLD3;ACP5;LAPTM5;MFSD1;TTYH3;FUCA1;IQGAP2;MSR1
NFIL3	12	SBNO2;UGCG;ADAMTS1;PNRC1;CEBPD;ZNF703;NR4A3;CDKN1A;HIF1A;NNMT;FOSL2;GADD45B
PROK2	12	SELL;SERPINA1;IL18RAP;MCTP2;MMP25;S100A8;CSF3R;CMTM2;NFE2;S100A12;MXD1;SORL1
COL4A5	12	ITGA8;MYH11;MRVI1;KCNQ4;SGCA;COL4A6;ATP8B4;REEP1;SPEG;SLC26A10;ARHGEF25;MUSTN1
ECHS1	12	DBI;DLD;PCCB;QDPR;ALDH1L1;ACSL1;CYB5A;CHCHD10;RBP4;LDHD;DECR1;REEP6
ZNF395	12	PPP1R3G;PPFIA4;PPP1R3C;CECR5;MXI1;PFKFB4;ENO1;ENO2;APLN;ALDOA;FGF11;KDM3A
PHLDA3	12	ANKRD53;ANO8;GLDN;DDR1;C5orf30;TSPAN15;BBS10;MGAT3;IFNGR2;PJA1;ESYT1;MAOB
RELL1	12	MFAP3;TMEM255B;ZNF385D;GPR68;ERG;GIMAP8;FAM110D;ADM5;CMIP;MCTP1;ABCD4;TACR1
ITPR3	12	ADD3;SPTAN1;PPL;PCDHGC3;PLEC;TTC7A;TEAD3;DBN1;ZMIZ1;EPS8L2;GAS7;ASAP3
HERC5	12	IFIH1;CLEC3B;CMPK2;TMEM140;EPSTI1;OAS1;RTP4;MRPL46;HERC6;BST2;IFIT2;ANPEP
HAPLN2	12	WFDC2;KCNH2;MPP2;TCEAL1;EZR;ADRA2C;GLI3;PALLD;TEX261;HPD;PIP4K2A;MYL9
ADIPOR2	12	GPAM;ACACA;ADORA1;PRRT4;DHCR7;PPARG;TKT;ME1;MAP2K6;INSIG1;MME;ACLY
EDN1	12	PDGFB;MECOM;RPGR;BACE2;MTUS1;CTGF;CDC42EP3;FBXO31;TPD52;BMX;SERPINE1;IFNGR1
P2RX6	12	ANKRD53;AOC2;ALDH4A1;EGFL6;SLC24A3;HSPB8;SNCG;KIAA1239;OSER1;HPD;UCHL1;SLC27A2
TMOD1	12	ITGA8;MYH11;SYNM;MAP4K4;PDLIM3;DES;MPP7;GRIK5;MYOCD;REEP1;C11orf96;AKAP1
C1QTNF3	12	CD70;SFRP4;PLEKHG4;WNT2;FNDC1;FBN1;ITGA11;COL1A2;COL1A1;PCOLCE2;PENK;SPSB4
NCAPH	12	DNASE2B;IL1RN;NCEH1;ASPHD1;IGSF6;DCSTAMP;SLC29A3;CD300LB;LIPA;MYBL2;MATK;FBP1
RTP4	12	SAMD9L;PARP9;STAT1;HERC6;IFIH1;EPSTI1;IFIT2;OAS2;HERC5;DDX60;BATF2;SAMD9
MAP3K5	12	ANKRD53;TBL1X;WASF3;DDR1;CRLS1;NAV2;ANPEP;IFNGR2;PTPN3;KIAA1239;ZNF438;ABHD5
HSPB7	12	SLC39A11;PMAIP1;CCDC107;SRCRB4D;GPR183;RASSF4;CYP4B1;TNIP1;SLC29A2;ARHGAP10;GPBAR1;NOL3
NUF2	12	CCNB2;TPX2;CEP55;NUSAP1;CDCA5;MKI67;ANLN;PKMYT1;TK1;PTTG1;KIF2C;TOP2A
LAMA2	12	DCN;LTBP2;ISM1;OLFML3;CYP4B1;EVC2;FSTL1;PTPRG;NID1;VIT;LAMC1;FBLN5
DMTF1	12	INTS3;DDX17;ZDHHC17;ZRANB2;OGT;FUBP1;ZMAT1;NKTR;SRSF11;C5;PNISR;LUC7L3
FAM84A	12	RAB25;THSD4;GJB2;RHOV;CALML5;DSP;ESRP1;PRKCZ;PVRL4;ZNF750;FZD10;LYPD3
SMCR8	12	IGIP;ZNF629;ZNF618;NHSL2;ATF7IP;SELRC1;UTRN;PPP1R21;TRIM44;RPRD2;ZFC3H1;CREBBP
PISD	12	KLHL25;BAG3;LOXL2;NPR3;ALDH4A1;CCDC107;THAP8;TMEM139;CDKN1C;ELN;C6;NCKAP5L
DKK1	12	DCN;ALPK2;CD70;ZNF385B;ISLR;DCLK1;FBN1;PDE7A;PXN;GPR133;DBN1;MMP27
CCND1	12	DMRT2;MYEOV;BIN1;CD34;APBB2;PIK3R1;SLC29A2;PARD3B;TEX2;CD248;NCOR2;TM7SF2
GRIK5	12	LRRC4B;TMOD1;CD34;KCNQ4;MPP7;NCS1;REEP1;SPEG;ITIH3;WFDC2;LOX;RIMS3
NTRK2	12	EPHX1;SOD3;CUTC;SELENBP1;ECM2;MAN1A1;SLIT3;PIK3R1;ATP1A1;ANGPT1;CXCL14;AMOT
CDH24	12	ANKRD29;EPAS1;NPDC1;PREX1;RUNDC3B;LRIF1;CDC42EP4;ABCB1;LAMA3;LCN10;TEK;ST6GALNAC1
CDKN1C	12	PLEKHF1;PISD;DDR1;ESYT1;TEX2;LMCD1;THAP8;OBSL1;GPBAR1;ALDH3A2;PQLC1;SLC35C1
CTSZ	12	CD52;NCEH1;SH3BGRL3;PLD3;MFSD1;HEXB;ST14;DCSTAMP;CD300LB;GRN;SLC15A3;TRPV2
ATF7IP	12	NFIC;SMCR8;IGIP;YTHDC1;MEF2D;PRR12;ATP11C;SF3A1;CREBL2;BAZ2A;ATXN7;KAT6A
SIDT2	12	YPEL5;EGFLAM;ARID5B;ADAMTSL4;NINJ2;DDR1;ESYT1;MYL6;HBEGF;GLUL;CISH;PYGM
KIAA0922	12	PAPSS1;G0S2;ANG;DTX1;PCED1B;ARHGEF6;PDE1B;DNAH9;FABP4;NNAT;FBLN2;KIFC3
POLR2A	12	NFIC;KMT2E;APP;MLLT1;NCS1;UTRN;SF3A1;MBD3;GLMN;BCL9L;KAT6A;RASSF3
LATS2	12	PRKCH;AMOTL2;MAML2;BMP2;LRRC8C;NEDD9;MYH9;FOXO1;MTPN;CTGF;ELF1;CTTNBP2NL
NHLRC3	12	INTS3;AQPEP;GAS2L1;LNX1;ACSS3;C7orf63;ZMAT1;IGFBP3;GART;TMEM42;LUC7L3;BZW2
IRS2	12	GNAI1;ANKRD53;ORMDL3;ACVR1C;CALHM2;PFKFB3;NRIP1;CRLS1;CENPV;HEBP2;BCL2;ABHD5
NDST1	12	KIRREL;PPM1F;HDAC7;FAM43A;UNC119B;PCDH1;NYNRIN;ZCCHC24;FAM129B;GIMAP6;RGP1;N4BP3
PLCB4	12	TM6SF1;THSD7A;ITGB4;CFI;LRRC1;NPDC1;ARL15;TMTC2;DARC;DUSP23;ANKRD29;TSPAN7
NUAK1	12	PDGFB;HHEX;LRRC8C;MECOM;ZBTB18;PEAR1;RPS6KA2;SH3BP4;FAM117A;CLK1;GIMAP6;CDH5
C11orf21	12	KLRB1;CD48;MYO1G;GZMM;AMICA1;TRAF3IP3;ZAP70;CD2;DENND1C;LIMD2;NUP210;CD3E
FAM105A	12	DOK2;SPI1;TBXAS1;ALOX5;C1QC;SELPLG;KCNQ1;CYBB;CD14;ALOX5AP;ITGAM;MYO7A
CD37	12	ITGB2;RAC2;CD48;LST1;KCNAB2;TFEC;LAPTM5;STXBP2;PTPRC;HCST;C19orf38;PARVG
MBNL2	12	RANBP3L;TIMP3;BMP2;PPAP2A;TACC1;FBXL3;NPY1R;DNAJB4;NEXN;MBNL1;DMD;TMEM47
FAM117A	12	ABHD6;NR3C2;LYL1;MYRIP;NUAK1;ZBTB18;ROBO4;CLEC14A;PPP1R13B;PNISR;THOC1;LUC7L
LTB	12	IL2RB;KLRB1;ANO9;LCK;CCR2;ZAP70;CD2;TRAF3IP3;LIMD2;CD3D;CD3E;GZMA
HSPB8	12	SAT1;EFNB1;C20orf24;BAG3;FMNL2;PDE1B;SLC7A4;RHOXF1;IFRD1;ZNF512B;ATP2B4;P2RX6
TRAM2	12	CDC37L1;MAP1A;VASN;ARID5B;RARG;PDGFRB;MMP14;SH3RF1;ZCCHC24;CLCF1;KLF9;SESN1
SYNDIG1	12	GREM2;MYH10;HSPB3;KCNH2;CCDC81;CPNE6;PPP2R2C;CHRDL2;FAT3;HTR2A;PCDH7;SHROOM3
RALGDS	12	SBNO2;UGCG;WDR1;ABCD4;STK38L;IFI16;FAM110D;SEMA4B;CSF3;GRAMD1A;SPSB1;FES
RASL11B	12	PRKAG2;HSPB3;RASSF3;CAMK2G;TPM2;GATA6;TCEAL1;NEXN;DMPK;WIPF3;CCDC81;HSD17B6
SAMD4A	12	CAB39L;ELN;PXDC1;CLEC3B;EIF4G1;CILP;FMNL2;IGFBP6;PXN;COL16A1;PIP4K2C;RNF19A
LRRC4B	12	SELM;RASSF3;RNF180;GRIK5;NPNT;EBF4;PRKG1;KCNQ4;PLEKHO1;HEY2;ITIH4;RIMS3
PDGFRA	12	HDAC7;FKBP10;CUTC;VCAN;FSTL1;PCOLCE;MOSPD1;GPC3;SLIT3;TRIP10;COL6A3;PRDM8
PCDH9	12	MAP1B;RANBP3L;ORMDL3;DAAM1;ASPH;LRP1B;TNIP1;PARD3B;ANGPT1;MAPKAPK3;MAN1A1;ANGPT4
ADAMTS9	12	PDGFB;LRRC8A;TNFAIP1;MINA;PEAR1;HOXB7;FAM212A;SMAD1;SLC25A30;RNF38;TMEM2;CCDC85A
SLC2A1	12	PMP2;EMILIN3;SFRP5;DRP2;MT3;GRIK3;TMPRSS5;FOXD3;ARHGAP39;CADM4;RLF;FAM101A
TM6SF1	12	LIPA;PLCB4;CTSD;ST14;FGR;KCNAB2;SORT1;SRGN;SH3BGRL;TAGLN;ALDH1A2;MSR1
BCL2L1	12	NCOA3;DMRT2;LRRC8A;WDFY1;LRRC8C;B3GNT2;PEAR1;RNF182;PER1;ZNF436;ATP11C;MARCH3
KIAA1671	12	TSPAN18;SH3BP4;TEK;ESAM;SLC9A3R2;HEG1;PODXL;JAG2;RAPGEF2;DACH1;ZMIZ1;FAM171A1
MFGE8	12	TIMP3;LTBP2;DENND2D;ADAMTS2;CD248;RABAC1;GRK5;PTPRG;PNMT;PTPRM;ZEB1;ANPEP
GNAO1	12	RAB9B;KCNH2;RYR2;RNF180;ADRA2C;FAT3;PDLIM7;TRPC4;P2RX1;WFDC2;HSD17B6;MYL9
SEMA4B	12	SBNO2;IFITM1;GALK1;ELL;ADCK4;CNTNAP1;ITPKC;ADM5;GRAMD1A;BCL6;TMEM173;RALGDS
PRR12	12	IMP3;ZNF628;PHF15;APP;PEAR1;ATF7IP;PIAS3;EBF3;BCL9L;PHLDB2;RPRD2;LUC7L
NOVA2	12	ADCY4;KCNJ12;AIF1L;MFNG;HEG1;EPHB4;PKN3;RGL2;NYNRIN;ZBTB46;CLK1;GIMAP6
PTPN18	12	DOK2;ITGAM;RAB24;ANXA4;VSIG4;KCNQ1;CD4;FOLR2;AP1B1;AIF1;CFP;IL10RA
MAZ	12	FGD1;TMEM259;CEBPD;UBL4A;CLIP2;CYBA;DOK4;CST3;MAP1LC3A;TBC1D13;C4orf48;HN1L
EBF2	12	NEURL1B;TIMP3;TRERF1;TP53I11;PEAR1;SPRY2;ITM2A;EBF3;ZNF423;VIT;CD248;FRMD3
TSPAN15	12	ANKRD53;GLDN;PDE1B;DDR1;ESYT1;MAOB;ME1;IFNGR2;PLXNB3;ATP2B4;PHLDA3;ABHD5
FAM129B	12	PRKCH;SLC44A2;EHD4;EPHB4;KIRREL;DAB2IP;KIF26A;CD93;CPNE2;MCOLN3;NDST1;SLC35C1
ECSCR	12	TLL1;EHD4;APLNR;CFI;CARD10;CD59;CD93;ELK3;IL33;PRKAR1B;TMEM173;TSPAN7
IER3	12	RGS16;NFKBIZ;UGCG;PTGS2;SELE;TNFAIP3;CSF3;IL6;ZFP36;ICAM1;ARRDC3;SERPINE1
TPD52	12	PDGFB;MYRIP;LRRC8C;ENG;MECOM;ZBTB18;GNG11;CD2AP;CLEC14A;PTPRB;EDN1;CDH5
UCP2	12	BACE2;NPR3;THAP8;EFEMP2;LOXL2;SPARC;SLC29A3;CD300LB;TLR4;LOX;SNX33;UBXN11
DCD	11	KRT77;AQP5;KIAA1324;KRT23;SCGB2A2;MUCL1;CALML5;KRT5;PIP;C5orf46;COL17A1
S100A8	11	SELL;SERPINA1;PROK2;VNN2;ARG1;S100A9;NFE2;CSF3R;MMP25;S100A12;GCA
NKG7	11	IL2RB;KLRB1;GZMA;CX3CR1;MYO1G;GZMM;GNLY;RARRES3;RUNX3;CST7;KLRF1
DACT2	11	WSCD2;FNDC5;WNT10B;LMX1A;NHSL1;PCSK6;FBN1;WNT2;WNT4;FGF16;SPSB4
CD300E	11	SERPINA1;FCN1;MYO1G;DENND4C;CCR2;ASGR2;PTPRC;NOD2;WAS;IL1R2;TNFSF13B
NFE2	11	SELL;SERPINA1;IL18RAP;PROK2;CCR2;MMP25;PPBP;S100A8;CSF3R;GPR97;S100A12
HES1	11	SERTAD3;SIK1;PIM3;BHLHE40;CDKN1B;SMAD7;JUNB;C15orf39;ANKRD37;DLL4;DDIT4
ANTXR1	11	MMP14;CTSK;TIMP2;THBS2;MEGF6;FAP;CRTAC1;MMP2;AEBP1;DPP4;PLXDC2
MMP25	11	SELL;SORL1;IL18RAP;PROK2;ARG1;NFE2;CSF3R;CMTM2;S100A12;CST7;S100A8
DHCR7	11	NUDT8;MVK;ADIPOR2;NSDHL;SC5D;ELOVL5;MVD;INSIG1;EBP;FADS2;DHCR24
B2M	11	CD74;HLA-DPB1;HLA-DRA;IFI27;PSMB8;EZR;PSME1;ISG15;PSMB9;BST2;SH3BGRL
PPM1F	11	DCHS1;MFNG;FAM43A;NDST1;RHOBTB2;TBC1D13;CBX6;PPP1R16B;RGP1;GIMAP6;PALD1
MIDN	11	RARA;JUNB;IRF2BPL;CSRNP1;NRARP;TRIB1;BCOR;PLEKHO2;THBD;SNAI1;BCL3
SAMD9L	11	C19orf66;IFIH1;ODF3B;STAT1;DDX60;EPSTI1;UBE2L6;RTP4;OAS2;HERC6;SAMD9
RARA	11	MIDN;PTPRS;CALHM2;EPHA2;SSTR2;PHF23;BCOR;SH2D3C;PLEKHO2;B4GALT5;BCL3
KLF6	11	NEDD9;CYR61;MECOM;TSC22D3;JUN;UNC119B;PER1;CDC42EP3;CITED2;RHOB;DAPK3
MT3	11	MPZ;SFRP5;DRP2;SORCS1;NRXN3;SLC2A1;PAQR6;PLEKHB1;PLP1;MBP;BCAS1
TNNC1	11	ACTN2;TNNT2;MB;CKM;CMYA5;DRP2;KLHL41;PMP2;MYL2;MYL1;COX6A2
PPP1R14A	11	SCARA3;MYL6;PDE3A;RBPMS;TLN1;RRAS;DTNA;SH3BGRL;MYL9;PICALM;TAGLN
FBXO2	11	B4GALNT4;FXYD3;B4GALNT3;ESRP1;FA2H;PLEKHB1;KLK1;SOX8;C2orf82;CADM4;RAP1GAP
PSME1	11	PSMB10;PSMB8;PARP12;RARRES3;EPSTI1;WARS;UBE2L6;B2M;PSMB9;BST2;IL18BP
MYC	11	CCNL1;IL6;ITPKC;ADAMTS1;CDKN1A;CSRNP1;NFKBIZ;ZFP36;FAM110D;SLC25A25;MCL1
COL6A6	11	MRC2;FAM19A5;ALPK2;PRRG3;FNDC5;TRIO;OGN;PXN;PIEZO2;DPP4;CDS1
FNDC4	11	PLXNB3;LIPE;RAC3;PDE1B;GCKR;ZDHHC18;ATP9A;LAMA4;KIFC3;TMEM132C;ABHD5
RGS16	11	CCNL1;CCL2;UGCG;PIM1;CCDC71L;SELE;CSF3;IL6;NFKBIZ;IER3;BCL3
ABCA8	11	ABCA6;EPB41L2;AUTS2;LYVE1;RGL1;NOVA1;PDGFRL;RGMA;ADD3;CBX4;CAV1
FCGRT	11	SLC18B1;SLCO2B1;C1QB;C1QA;CRYBB1;MCOLN1;TTYH3;AP1B1;FUCA1;FOLR2;CPVL
CYTH4	11	SPI1;DEF6;NCF4;CSF1R;ARHGAP30;DOK3;GNA15;SH3BP1;HCK;PLEK;PIK3AP1
NR4A3	11	CHD1;NGF;ADAMTS1;NR4A2;USP2;NFIL3;FOXF1;BCOR;C11orf96;TOB1;ZBTB21
CTHRC1	11	FAM180A;CTSK;ELN;TIMP2;WISP2;AEBP1;COL1A2;LOX;MMP2;COL16A1;ITGBL1
IL2RG	11	KLRB1;CD48;GZMM;CXorf65;S1PR4;RUNX3;PTPRC;LIMD2;SNX20;TBC1D10C;HLA-DMB
ITIH1	11	DCN;SELM;RAB9B;KCNH2;KCNQ4;RYR2;PPP2R2C;FAT3;ITIH3;WFDC2;HSD17B6
HECW2	11	PPAP2A;CALCRL;SLC9A3R2;WNK1;CRHBP;RAMP2;TCF15;ETS1;SCN4A;FGF12;PPM1H
DDIT4	11	NEDD9;ZMYND8;CDC42EP3;TSC22D3;DENND3;PER1;MTFP1;ARRDC2;HES1;FRY;SERPINE1
C4orf48	11	ZNF444;CEBPA;MAZ;TRAPPC5;FAM173A;TMEM160;CYBA;FBXL15;PRR7;HES4;CITED4
EPHX1	11	ETFA;NUDT8;CUTC;SELENBP1;CLMN;ASPH;NTRK2;ME1;BCL6;SLCO4A1;ABHD5
KDM3A	11	PPP1R3G;EGLN3;RLF;MLLT4;KIAA0232;ENO1;ANKRD37;ALDOA;CLEC2B;FAM13A;ZNF395
MEOX2	11	RASSF9;TCF4;NR3C2;MYCT1;TMCC3;MEF2C;CLEC14A;ZNF423;CDKN1B;EBF3;ABHD6
KALRN	11	CCRL2;SHANK3;GNAZ;PDE2A;MGAT1;ADRB2;TSPAN6;CA4;SCN4A;KIAA1217;ST6GALNAC3
NR4A2	11	KCNK5;CA2;EGR3;FOSL2;JUNB;HBEGF;CREM;NR4A3;GRASP;ARL5B;CH25H
FRZB	11	PTK2;NEBL;LINGO1;EPHA3;RCAN2;RBPMS2;TBX2;RGS5;EFHD1;ANGPT1;GPRC5C
LPAR1	11	DCN;CBLB;ADD3;SCARA5;NOVA1;DCLK1;CELF2;GAS1;VIT;PID1;GAS7
LAMC1	11	RECK;LAMA2;XXYLT1;HDAC7;FSTL1;COL5A3;NID1;PCDHGC3;FBLN5;ZEB1;COL12A1
SLITRK4	11	REEP6;MAP1B;PGRMC1;AFF2;PON2;NPY2R;GREB1L;KDM6A;MMP27;MBNL3;KDM5C
SELP	11	EPAS1;NPDC1;CPXM2;SLCO2A1;DARC;PLA1A;PKP1;ABCC4;PRCP;RAMP3;N4BP3
GNG11	11	PDGFB;LRRC8A;FZD6;TPD52;ROBO4;TFPI2;CD2AP;AKT3;ARHGDIB;DACH1;CDH5
MFAP4	11	DCN;LGALS3BP;TIMP2;SSC5D;CCDC80;CHRDL1;ECM2;CILP;SLIT3;COL16A1;PI16
ABCD4	11	RALGDS;SNTG2;RELL1;TMEM255B;CPLX1;SH2B2;DARC;ADM5;TCTEX1D1;ZNF385D;GPR68
TCIRG1	11	TBC1D8;SLC17A9;POLD1;ALCAM;ZNF219;MICAL1;BAD;DEK;MYO9B;CCDC88A;MATK
ARHGEF6	11	MDFI;SRPX2;PCED1B;LIMCH1;PCYT2;MAOB;IFNGR2;NNAT;PHLDB1;KIAA0922;KIFC3
IL18BP	11	CD74;IFITM1;PSMB10;WARS;RARRES3;EPSTI1;PSME1;UBE2L6;PSMB9;PSMB8;HLA-DMB
ETS1	11	TCF4;AIF1L;EFNB1;SLC9A3R2;WNK1;ARHGAP31;HECW2;SCN4A;FGF12;NES;KDR
PCK1	11	LGALS12;APMAP;ISOC1;PLA2G16;PDE3B;GPT;GPD1;MOGAT1;G0S2;RP11-863K10.7;COX14
C5orf46	11	KRT77;AQP5;KIAA1324;KRT23;DCD;SCGB2A2;MUCL1;CALML5;C2orf82;PIP;SERPINB5
PRIMA1	11	FAM19A5;SOX10;SORCS1;GRIK3;FOXD3;NRXN1;PLEKHB1;PMP2;GFRA3;PLP1;MAL
ATP10A	11	YPEL5;EGFLAM;DDR1;TACC1;C1QTNF1;ROCK2;BBS10;MAOA;ZFHX3;PICALM;ARHGEF26
MYO1F	11	FYB;PLCB2;SPI1;GPSM3;ARHGAP30;DOK3;STXBP2;PTPRC;ARHGAP9;HCK;SASH3
AHDC1	11	PGF;LRRC8A;HDAC7;ZBTB7B;SH2D3C;MKL1;FAM212A;SMARCD2;BCORL1;SNAI2;BCL9L
NCOR2	11	PPAP2B;CCND1;CD248;WNK1;APBB2;PODXL;FOXO1;PIK3R1;NFIX;BIN1;FGFR1
LIMS2	11	PLXNA2;MAMDC2;CCDC68;CRIP2;SLC9A3R2;ANGPTL1;TACC1;ARHGAP4;RASAL2;ZYX;MYO7B
PLVAP	11	KCTD12;CMIP;EMCN;TMTC2;CD93;CYYR1;CLEC14A;PTPRB;NCKAP5;C5orf54;TSPAN7
CHSY3	11	RRAGD;REM1;INPP4B;CSRNP3;LPPR4;TRPC6;IGFBP7;EPS8;FHL5;NR2F2;MYO10
HPGDS	11	CPA3;RAC2;RGS13;MS4A2;CTSG;PIK3R6;ITGAM;MRGPRX2;SLC18A2;PLEK;LPAR5
ANK2	11	MAP1A;NFATC2;AUTS2;MMP2;ISLR;TNFAIP6;THBS3;STON2;DPP4;NOVA1;GAS7
DCXR	11	PLA2G16;PTPRF;HRSP12;PCYT2;PC;GPD1;ADHFE1;GPT;IZUMO4;PXMP2;ABCD2
GART	11	NHLRC3;NIT2;ACSS3;GSAP;AQPEP;MCM6;BZW2;CRLS1;GIPC2;PLAGL1;TMEM42
NR2F2	11	AMOTL2;CHST15;NCK2;ENDOD1;TSPAN12;FHL5;CHSY3;NOTCH3;IGFBP7;SYNPO2;LMOD1
ARHGEF9	11	MRVI1;PDLIM7;CYFIP2;PRKAA2;TPM2;REEP1;RAB9B;PRUNE2;DTNA;CSRP1;MYL9
EFEMP2	11	INTS3;SEC11C;COPZ2;COL4A1;PLOD1;CCS;OBSL1;UCP2;B4GALT2;DDAH1;CKAP4
ADCY4	11	NPDC1;HEG1;EPHB4;NOVA2;ARHGAP31;RIPK3;TEK;CASKIN2;ADAM15;RAPGEF3;JAG2
LY86	11	ITGB2;LAPTM5;TYROBP;IFI30;CD300LF;ST14;WDFY4;HCST;TREM2;LCP1;MSR1
MOGAT1	11	PAPSS1;APMAP;PCK1;ISOC1;FAM47E-STBD1;KRT79;CLUH;EGFL6;FAM198B;CITED1;GCHFR
EIF4G1	11	CAB39L;COPZ2;ELN;LRRC16A;JMJD1C;SAMD4A;ALDH4A1;TRIM44;LAMB2;DDAH2;GSN
VCAN	11	PDGFRA;PLAGL1;SLC39A14;ANTXR2;TPST1;FBN1;PLA2G2A;ABI3BP;FSTL1;XPNPEP2;PROCR
TGFBR2	11	TLL1;MFNG;MKL2;CYYR1;FRAT1;GIMAP8;GIMAP4;FAM13C;GIMAP6;GIMAP7;GIPC2
GABRA4	11	HPSE2;ACTC1;AMIGO2;PPP2R2C;PPP2R2B;WFDC1;FOXL1;P2RX1;KCNA5;HEY2;HTR1B
EZR	11	NCOA3;HAPLN2;PPP1CB;THBS2;RGS5;B2M;LDLRAD4;MMP28;SRGN;GNA13;PACSIN2
NR2C2	11	SMC1A;SMAD4;SLC12A6;MYSM1;SPICE1;BAZ2A;PPP1R18;TRIM44;MAPK8;CREBBP;ZZEF1
AKAP13	11	DCN;LAMA3;ARID5B;SYTL3;TLDC2;MKL1;FSTL1;ITPKC;SH3PXD2B;HOXA9;AMOT
PMM1	11	ORMDL3;ACSS3;PDE1B;GLIS1;GLYCTK;PHOSPHO2;TTC36;USP30;GPD1L;KIAA1239;SLC27A2
C2orf82	11	AQP5;FXYD3;RAP1GAP;SCGB2A2;MUCL1;GJB6;FBXO2;PIP;C5orf46;SOX8;FA2H
ANXA4	11	PTPN18;SH3BGRL3;SCARA5;NOVA1;PAMR1;ECM1;ANGPTL5;STARD9;EMP3;DBN1;GAS7
SLC38A1	11	FAXC;RASSF3;MPP7;KCNMA1;NCS1;NPNT;P2RX1;MYOCD;MAPK4;GATA6;HSD17B6
MCHR1	11	ASB2;RAB33A;KCNH2;TMEM35;NTS;ITM2C;SMTN;LGI3;SLC8A1;DIRAS1;DAB1
LUM	11	COL5A2;MRC2;ASPN;CCDC80;COL14A1;P4HA2;OGN;SLIT3;SH3PXD2B;COL1A2;HTRA1
SCN1B	11	CD163;TIAM1;OLFM1;ALOX5AP;PLTP;TSPAN7;ABLIM2;DUSP23;MYO7A;PDIA5;HPN
PAQR6	11	B4GALNT4;PMP2;SOX10;MT3;COL9A3;FA2H;PLEKHB1;DRP2;AATK;MBP;BCAS1
MBNL3	11	SLITRK4;LTBP4;CFD;PCSK6;AFF2;NPY2R;AR;EBF4;KCNIP3;SPTBN1;GSN
TCN2	11	EPAS1;AIF1L;TEK;TIMP3;IFI27;C1QA;MFSD6;SH3BGRL;PLAT;LYST;FUCA1
HMHA1	11	CD53;FGD3;DOCK2;DENND1C;HCLS1;ARHGAP9;ARHGAP4;SNX20;IKZF1;EBI3;TRPM2
GPIHBP1	11	LNX1;FAM168A;SPARCL1;EFNA1;ELTD1;KIF17;SCNN1B;THOC1;CDH5;CCDC85A;ICAM2
MFAP3	11	TLL1;BACE2;WSCD1;ATP13A3;GPR146;RELL1;KL;ERG;DLL4;CMIP;PDIA5
PSME4	11	ERLIN1;DST;MLLT1;MYO9B;SF3A1;JMJD1C;CLK1;LUC7L;ATP13A3;IFRD1;ZNF629
C19orf38	11	SERPINA1;CD48;WAS;CD37;CD300LF;PTPRC;HCST;MNDA;TLR8;CSF3R;GPSM3
MXRA8	11	SPON2;MRC2;TIMP2;WISP2;LTBP2;HTRA1;SH3PXD2B;COL16A1;MMP2;PLXDC2;ASAP3
OGN	11	PODN;MRC2;HSPA2;PRRG3;SRRM2;COL14A1;ECM2;LUM;GLT8D2;PAM;COL6A6
ZBTB7C	11	SCN7A;LGR6;PRKAB2;HSPB3;KCNH2;PIP5K1B;PRKAA2;ZFHX3;ANGPTL7;ZNF423;LRRC10B
NLRC4	11	COL6A3;KYNU;NCKAP1L;AQP9;ARHGAP30;MNDA;CARD9;GPR65;SH3BGRL;TLR8;SASH3
TMPRSS5	11	PMP2;EMILIN3;RAP1GAP;SFRP5;DRP2;COL9A3;SLC2A1;FA2H;AATK;MPZ;MAL
SETD5	11	TMEM63A;KLF11;FNBP4;RASSF3;ARHGAP30;GPR65;BAZ2A;LYN;MYD88;MTMR3;ANKRD28
STXBP6	11	CD70;EGFR;DCLK1;CELF2;IGFBP6;EMP3;GPR133;TRIP10;DBN1;ABCC1;GAS7
MAML2	11	NEDD9;KITLG;TICAM1;LATS2;ABCB1;EPS8;DACH1;ARHGAP6;MAN1A1;CHST7;CAV1
DDX60	11	SAMD9L;STAT1;DHX58;CTSO;EPSTI1;MX1;IFI44L;RTP4;OAS2;PSMB9;HERC6
SH3PXD2B	11	MRC2;CTSK;FRAS1;DCLK1;COL1A2;AKAP13;MXRA8;SMOC2;COL6A3;LUM;PXN
TRMT13	11	NCK2;HEATR1;ZNF691;CADPS2;SH3BP4;RNF38;CPNE2;PDCD11;GIPC2;PAXBP1;BTAF1
NTHL1	11	MMP28;GAS2L1;NCK2;SLC9A3R2;AVPR2;SOX13;LIFR;GIPC2;CCND3;ST6GALNAC1;CRIP2
TRAM1	11	HSPA13;SGK223;AKAP2;PPRC1;TMEM123;GNG12;CD2AP;MTPN;RNF38;THOC1;PAXBP1
CENPV	11	ETFA;ANKRD53;FAM198B;RASSF4;IRS2;FAM107A;RGS5;TNIP1;KIAA0040;HRC;ABHD5
INTS3	11	NHLRC3;PGAP2;EFEMP2;CCS;ZMAT1;COPZ2;RPUSD1;FBF1;LYN;PLAGL1;DMTF1
FXYD5	11	SH3BP4;ESAM;SH3BGRL3;MYH9;SYT7;MEF2C;ELK3;PTMS;PTPRB;DNM3;SF3A1
PLA2G1B	10	SYCN;REG1A;REG1B;CPA2;CLPS;CPA1;CPB1;INS;KLK1;PNLIP
HLA-DRA	10	CD74;HLA-DPB1;IFITM1;ABI3;B2M;TSPAN7;PSMB9;HLA-DPA1;HLA-DMB;HLA-DMA
FOS	10	EGR1;BTG2;FOSB;JUNB;JUND;NFKBIZ;ZFP36;MCL1;DUSP1;ATF3
CYR61	10	NEDD9;ITPRIP;SPRY2;CDC42EP3;JUN;KLF6;CTGF;WEE1;DUSP1;SERPINE1
SRSF11	10	SREK1;FNBP4;OGT;TIA1;SLC25A36;MYSM1;PNISR;ARGLU1;DMTF1;LUC7L3
FCER1A	10	CLEC10A;CD1C;CPA3;KIT;PIK3R6;CMA1;SIGLEC6;CTSG;MS4A2;RGS13
MVK	10	DVL2;DHCR7;SREBF2;SC5D;EBP;HMGCR;INSIG1;MVD;FADS2;SQLE
GYS2	10	LGALS12;GPAM;SOS1;CYP4F22;PFKFB1;FAM166B;DGAT2;DGAT1;ABCD2;LDHB
ATF3	10	JUNB;BTG2;FOS;FOSB;EGR1;JUN;JUND;NFKBIZ;ZFP36;ZBTB21
ARL5B	10	CCNL1;UGCG;NR4A2;SELE;CDKN1A;TNFAIP3;IL6;ZFP36;RNF122;CH25H
RGS3	10	EGFLAM;ARID5B;GRB10;DDR1;C5orf30;ESYT1;BBS10;CISH;IFNGR2;GNAI1
CDCA3	10	MKI67;ANLN;CCNA2;CCNB2;PLK1;SPAG5;FOXM1;AURKB;KIF2C;TOP2A
HEYL	10	NGF;EFHD1;ADAMTS1;HEY2;TBX2;SSTR2;FOXF1;TOB1;HES4;LRRC10B
COL4A6	10	ITGA8;ASB2;MRVI1;SYNM;TMEM35;COL4A5;TCEAL1;SLC8A1;DAB1;CSGALNACT1
IFI27	10	FAM107A;LY6E;ODF3B;TCN2;IFI44L;B2M;OAS2;ISG15;BST2;HERC6
EEF1A2	10	TCAP;ACTN2;ACTA1;MB;CKM;KLHL41;MYL2;MYBPC1;TRIM54;COX6A2
SELE	10	CSF2RB;RGS16;NFKBIA;TNFAIP3;CSF3;NFKBIZ;VCAM1;ICAM1;IER3;ARL5B
MMP7	10	SPINT1;SDS;CHIT1;TREM2;TFRC;SPP1;FBP1;MMP8;MMP9;MATK
L1CAM	10	FAM19A5;ENTPD2;SFRP5;SOX10;COL9A3;NRXN1;GFRA3;PLP1;CADM4;MAL
FADS2	10	DBI;EBP;DHCR7;OLFM2;ELOVL5;ME1;INSIG1;ACLY;MVK;DHCR24
MYSM1	10	SREK1;ZDHHC17;FAM76B;PNISR;NR2C2;ZZEF1;SRSF11;XRN1;KIAA1033;RICTOR
RHOB	10	FAM102A;TSC22D3;JUN;ROCK2;KLF6;KLF2;ARRDC2;FRY;DUSP1;KLF9
CCR5	10	FAIM3;CD48;RPS6KA1;PTPN7;TBC1D10C;CD300LF;GPR65;IL24;NUP210;SASH3
RAB37	10	RGS13;CPA3;SKAP1;CTSG;CMA1;TRAF3IP3;SLC18A2;SIGLEC6;KIT;MS4A2
H1FX	10	IGIP;XPO5;HMGB2;MEF2C;PPP1R35;SDPR;KLF2;CDKN1B;H1F0;HES4
FLI1	10	KCTD12;ENG;TSPAN12;CPD;KL;ARHGAP31;TSPAN7;CYYR1;GIMAP7;MEOX1
YWHAH	10	PDLIM7;CALM1;PRKAG2;VCL;ITGA5;ILK;RAB23;DLGAP4;VASP;STK38L
ARHGEF25	10	MYH11;DTX3;MUSTN1;RCAN2;PDE3A;NPNT;COL4A5;SPEG;SLC26A10;LMOD1
HTR2A	10	FAXC;KCNH2;CCDC81;PPP2R2C;PCDH7;FAT3;TRPC4;CHRDL2;SYNDIG1;HSD17B6
CD1C	10	KLRB1;FCER1A;TSPAN33;AMICA1;PIK3R6;GAPT;LGALS2;SNX20;IKZF1;PTPRC
NRARP	10	SOX18;MIDN;TOB1;HEG1;EPHA2;ID1;TBX2;FOXF1;SNAI1;GPRC5C
ACTN2	10	ANKRD1;MB;CKM;CMYA5;KLHL41;MYL2;TNNC1;MYL1;EEF1A2;COX6A2
RRAS	10	ALDH4A1;FXYD1;NME3;TLN1;LGI4;SNCG;PPDPF;LGALS1;H2AFJ;PPP1R14A
HAS1	10	TNFAIP6;UAP1;RASSF5;WNT4;FGF18;GPR133;GFPT2;ACKR3;HAS2;HTRA3
BMP6	10	KCTD12;WDR1;TCF4;ABHD6;TSPAN13;GNAZ;PDE2A;CRIM1;CDH5;SLC1A1
WSCD1	10	PGF;BACE2;MFNG;ENPP2;SMAD1;EFNA1;MFAP3;SCNN1B;N4BP3;PALD1
THBS3	10	FAM198A;DPYSL3;SFRP4;WNT2;TNFAIP6;ANK2;PCOLCE2;TPPP3;ITGA11;PTGFRN
ITGBL1	10	DCN;FAM180A;EPS8L2;ISLR;ECM1;COL1A2;SLIT3;COL16A1;CTHRC1;COL12A1
GATA2	10	SOX18;FHOD3;LYL1;AVPR2;NOTCH1;FAM69B;CLEC14A;PTPRB;LRRC8A;CCDC85A
IQGAP2	10	ACP5;IL10RA;RNASE6;TYROBP;C3AR1;MPP1;CD86;DOCK2;GFRA2;MSR1
CYTIP	10	SORL1;SMAP2;CD48;MYO1G;GPR183;RBPMS2;PTPRC;CXCR4;SAMSN1;SNX20
CYB5A	10	FCN2;C20orf27;PPARG;PC;ACSL1;ECHS1;GLUL;ACSS2;LDHD;TMEM52
LMNB1	10	CSF2RB;SBNO2;CCDC71L;CDKN3;IFI16;ZNF436;SH2B2;MARCH3;GRAMD1A;CDC7
CENPF	10	MKI67;TPX2;ANLN;CCNB2;CEP55;PKMYT1;FOXM1;CDCA5;PTTG1;TOP2A
MEDAG	10	UAP1;ACKR3;SMAD3;ABL1;CLCF1;IGFBP6;TRIP10;GFPT2;SNX21;HTRA3
CPVL	10	CD53;IL10RA;TYROBP;C1QB;C1QA;CD86;ARHGAP30;COL6A1;FCGRT;FUCA1
DLAT	10	DBI;RMDN3;NSDHL;TMEM135;PRRT4;ALAS1;C7orf41;SREBF1;C19orf80;ACLY
PDE3A	10	MYH11;LTBP1;KCNAB1;MYOCD;EDNRA;SORBS2;ARHGEF25;PPP1R14A;PDE5A;TAGLN
RLF	10	EGLN3;PER1;SLC2A1;ENO2;ZUFSP;OSER1;KDM3A;FEM1C;NOL3;ZNF292
DUSP7	10	SOX18;C17orf59;LYL1;ENG;AVPR2;FAM212A;EGFL7;ERF;KIF17;ZBTB46
RLTPR	10	ANO9;GZMM;CD27;LY9;LCK;ZAP70;CD2;TRAF3IP3;CD3E;MS4A1
RAB3IL1	10	RGL1;DPP4;EFNA5;CD2AP;IFI16;TMEM47;RGMA;SLC43A3;HMG20B;ASAP3
BCHE	10	RAB9B;DIRAS1;KCNH2;TMEM35;NTS;CPNE6;ITM2C;MUM1L1;SLC8A1;PI15
HEBP2	10	PPP1R1A;PLA2G16;LIPE;DTX1;RPLP2;FAM47E-STBD1;IRS2;PNPLA2;FABP4;NNAT
ARHGEF3	10	NPDC1;ITGB4;CD34;CYYR1;PLCG2;TSPAN7;EBF1;GIPC2;C10orf128;ZNF423
IL18RAP	10	SELL;SORL1;PROK2;VNN2;ARG1;NFE2;CSF3R;MMP25;CST7;MCTP2
CCNA2	10	MKI67;NUSAP1;PLK1;CEP55;H2AFX;CDCA3;FOXM1;AURKB;AP1B1;IQGAP3
ABLIM3	10	CA4;TNN;ST6GALNAC3;MCF2L;PDE2A;USP13;SCNN1B;CTNNBIP1;KIAA1217;SHANK3
FGF12	10	TCF4;AIF1L;PREX1;SLC9A3R2;MCC;CRHBP;CD2AP;ETS1;HECW2;TM4SF18
GRAMD1A	10	SBNO2;UGCG;LMNB1;RALGDS;CDK2;ITPKC;PGS1;DARC;SEMA4B;TMEM173
ASGR2	10	CLEC10A;SERPINA1;FCN1;CD163;CCR2;S100A9;TLR8;WAS;ALOX5;CD300E
KYNU	10	NCF2;NLRC4;TFEC;SDS;FGR;CD86;LAPTM5;IFI30;MNDA;MSR1
BMX	10	BACE2;MPZL2;MYRIP;FZD6;MECOM;FILIP1;ENPP2;CTGF;SNCAIP;EDN1
HSDL2	10	ETFA;HADH;PCED1B;EPB41L4B;CAT;PEX19;FABP4;CRLS1;CIDEA;ABHD5
SULF2	10	IFITM1;CPXM2;CFI;CARD10;SPNS2;C10orf128;NPDC1;DARC;ADM5;GPR68
AFF2	10	RSPO1;PROK1;SLC7A10;SLITRK4;PON2;CORIN;NPY2R;B3GALTL;MBNL3;SPINK2
ETFA	10	MLYCD;HADH;EPHX1;PDE1B;CD34;FABP4;CRLS1;CENPV;ABCC1;HSDL2
STK38	10	ABCA6;RBM5;CCDC80;KIFAP3;UAP1;EVC2;FSTL1;UBTD2;GPR133;RNF146
ROCK2	10	TACC1;ZFHX3;TEX2;LMCD1;SLC29A2;ATP10A;RHOB;CD248;IL16;PICALM
MCOLN3	10	PLXNB2;EPB41L2;STMN2;PIEZO2;PAMR1;DPYS;CHN1;FAM19A5;FAM129B;DPP4
CCSAP	10	DNASE2B;ASPHD1;HDAC7;FKBP10;DOCK3;CTSD;CD300LB;IFITM10;MATK;GNA13
PEX19	10	HADH;PLA2G16;PPP1R1B;GLIS1;ZNF691;DNAH9;PDK2;HSDL2;SCRN2;TMEM132C
DNAJB4	10	CTGF;BMP2;FILIP1L;FBXL3;PALLD;UBALD1;PELO;FHL5;MBNL2;TMEM47
RELN	10	GFRA3;SOX10;COL9A3;NRXN1;DOCK5;TBX1;FOXD3;RP11-451M19.3;TFF3;PROX1
PPAP2A	10	CNR1;PELI1;HECW2;TSC22D1;SLC9A3R2;TRAPPC5;MYL6;ANGPTL1;TACC1;MBNL2
GRB7	10	CCDC64B;AQP5;SCGB2A2;RHOV;DSP;SCNN1G;ESRP1;TACSTD2;SERPINB5;COL17A1
BAIAP2	10	SDPR;SH3RF1;TACC1;WNK1;ELMSAN1;FOXO1;PTPRB;ARRDC2;ELF1;RASAL2
NOL3	10	TRAF1;NPR3;ALDH4A1;HSF4;CSK;HSPB7;RLF;TNIP1;ELOVL5;CTIF
LONRF1	10	ZBTB16;SH3RF1;FAM214A;TSC22D3;RCL1;DENND3;ITPKC;IFNGR1;IRAK3;SERPINE1
TM4SF18	10	COL15A1;SGK223;NR3C2;TM4SF1;ROBO4;CD2AP;KIF17;DACH1;FGF12;KDR
SRRM2	10	LRIF1;ETV6;PAM;KAT2A;TIA1;CILP;OGN;RECK;LUC7L;LENG8
LGALS1	10	PHPT1;ANXA5;CCDC107;GPC1;NDUFB7;ITGAV;RRAS;ADIRF;COL6A1;S100A6
E2F1	10	TPX2;BUB1B;ZWINT;CEP55;PKMYT1;CDCA5;CDC45;MYBL2;UBE2T;ASF1B
CDK1	10	MKI67;CENPM;CCNB2;CEP55;TPX2;PKMYT1;KIF23;PTTG1;MYBL2;ASF1B
PLSCR1	10	IFITM1;SECTM1;ZNF385D;RUSC2;DARC;GNA14;NNMT;ARHGAP12;DLGAP4;SP110
CD72	10	SDS;PLAUR;ZMYND15;AQP9;CYBB;TFRC;VMO1;SLAMF9;SIPA1L1;HMG20B
ARL15	10	EPAS1;PTK2;PLCB4;NCK2;CADPS2;RUNDC3B;MFSD6;THSD7A;YJEFN3;CYYR1
THBS2	10	MMP14;CTSK;ANTXR1;JHDM1D;IRF4;MMP2;SPARCL1;EZR;DPP4;COL12A1
SORBS1	10	ADCY5;KCND3;TIMP3;RTN1;MAOB;ATP9A;RNF150;WFDC2;HSD17B6;PLIN1
SORT1	10	TM6SF1;CCDC107;EDIL3;CTSD;TPM2;NPNT;GPC1;SH3BGRL;FLNA;SPOCD1
ECHDC2	10	HADH;EPHX2;PFKFB1;HOXB7;ZMAT1;CNTFR;ABCA5;RPUSD1;GABRE;SLC25A27
WFDC1	10	NPNT;LTBP1;ACTC1;TPM2;JPH2;P2RX1;GABRA4;ITIH3;AMIGO2;HEY2
FOXL1	10	FAM181B;AMIGO2;NRGN;RCAN2;EPHA3;GABRA4;KCNA5;HEY2;FOXC2;HTR1B
CAPG	10	DNASE2B;ACP5;NCEH1;ASPHD1;SH3BGRL3;CHIT1;DCSTAMP;TREM2;S100A6;CD9
ITGA5	10	DBNDD2;FAM168B;ENO1;STK38L;CORO1C;YWHAH;DMPK;TRIM44;SERPINE1;CAV1
FAM46B	10	CACNA1H;MRVI1;RASL12;CAMK2G;TCEAL1;TPM2;JPH2;PALLD;NEXN;LMOD1
C11orf96	10	TMOD1;NR4A3;MUSTN1;JUNB;NPNT;RBM24;GATA6;ADAMTS1;COL6A3;HES4
LMCD1	10	LOXL2;FAM198B;PREX2;THAP8;C1QTNF1;ROCK2;SLC29A2;CDKN1C;MMP28;SLC35C1
NOD1	10	LGR4;ZNF217;ULK1;ADAMTSL4;SLC39A14;RUNX1;IFNGR2;DAB2;PHLDB2;TMEM2
CCDC68	10	SLC6A6;LNX1;SLC9A3R2;EML1;MCC;PREX1;LIMS2;MEF2A;ATP9A;HEY1
MERTK	10	SMAP2;RRAD;CD163;RNASE6;FRAT1;NEXN;FHL5;RNASET2;SLA;PACSIN2
BAG3	10	ALDH4A1;SNCG;CLEC3B;CDKN1A;TMEM139;FAM173B;CYP4B1;HSPB8;PISD;NUMBL
KL	10	KCTD12;FLI1;TMCC3;MFAP3;TMTC2;EED;THOC1;CYYR1;ZFC3H1;CCDC85A
FAM102A	10	VAT1;CTSK;CRYM;ITGB8;PNLIPRP3;CLIP2;IGFBP7;RHOB;ARHGAP6;MMP2
SAT1	10	FMNL2;FAM166B;RASSF4;HSPB8;PPTC7;TEX261;ELOVL5;C19orf80;CLK1;HEXIM1
GAB2	10	CDC37L1;CNNM3;PLEKHF1;WASF3;CLEC3B;CUTC;SLC29A2;PIK3R1;HDAC5;SLCO4A1
SPRY2	10	ERRFI1;SDPR;CYR61;NEDD9;REM1;SPRED2;PER1;EBF2;SIK1;APOLD1
TNFRSF12A	10	RUSC2;ANXA5;KCNQ3;MAP2K3;DLGAP4;F13A1;CHST3;SPOCD1;FADS3;LHFPL2
CRYBB1	10	DOK2;ARHGAP30;LYVE1;C1QC;AIF1;CYBB;AP1B1;FCGRT;PLEK;GPR34
C1orf122	10	C9orf16;NME3;EVA1B;RASSF4;SCAND1;BAD;FBXL15;MAP1LC3A;TXNL4A;RABAC1
AR	10	AOX1;BCL6;APBB1IP;ABCD2;SLC7A6;GNAZ;TPRG1;LRP1;MBNL3;CXCL14
TMEM43	10	HADH;ELN;CD34;TIMP3;TTC7A;EMP1;MBNL1;FADS3;CD248;LMNA
ARHGAP39	10	EMILIN3;RAP1GAP;ITGB8;GRIK3;FA2H;SLC2A1;LMO7;SOX8;COBL;CADM4
JMJD1C	10	TRAF2;PELI1;PSME4;RFX3;TMEM55A;LDB1;UBR3;ZBTB17;EIF4G1;VPS13C
RBM5	10	PNISR;SMG9;NOTCH1;TP53BP1;RNF38;STK38;CLK1;THOC1;ACAD11;GIPC2
PLAT	10	TPO;TCN2;FAM107A;OLFM1;TSPAN7;ALDH1A2;VIPR1;CST3;ST6GALNAC1;PNMT
PDE4D	10	GREM2;SELM;TMEM61;NCALD;MN1;MSRB1;KCNMA1;SHROOM3;MAPK4;P2RX1
DBI	10	LGALS12;TMEM135;ACSF2;KRT79;UQCRQ;ECHS1;DLAT;EBP;MVD;FADS2
TACSTD2	10	GRB7;KRT23;RAB25;RHOV;DSP;SFN;ESRP1;KRT5;SERPINB5;LYPD3
HEXB	10	NCEH1;PLD3;ALCAM;CTSD;CD164;CYP27A1;NPC2;CTSZ;GLA;GRN
MGAT1	10	AIF1L;EFNB1;KALRN;KLF11;GNAZ;CCRL2;ADRB2;SCN4A;CA4;HSPBP1
BCL6	10	EPHX1;LRP1;PPAP2B;FZD7;CUTC;CNOT8;NNMT;SEMA4B;TPRG1;AR
ENO2	10	PPFIA4;PRSS53;RLF;CA12;CYYR1;GBE1;FAM13A;ZNF395;PARM1;APLN
ZNF438	10	CCDC51;GPAM;APBB1IP;RPS21;ZEB1;EVC2;MAP3K5;ARHGAP20;SLC43A3;FBLN5
YKT6	10	FAM168B;SELENBP1;RRP9;GRINA;EXTL3;SLC7A6;MGAT4B;RPS6KA4;PPP1R16B;RGP1
PPP1R18	10	TCF4;KCTD11;IGIP;FAM76B;TMEM81;NR2C2;ZZEF1;TRIM47;SNX33;BCL3
STARD9	10	ANXA4;NOVA1;EVC2;SLC2A4RG;EMP3;S100A4;S100A10;LIMD2;ODC1;CUEDC1
TMEM42	10	NHLRC3;HSD17B8;PREPL;ACSS3;ZMAT1;MTR;RPUSD1;RBM14;GART;TMEM8B
NEK7	10	HIPK3;RANBP3L;PPP1CB;ASPH;ZNF219;FAM198B;C7orf41;DEK;DMD;UCHL3
IFNGR1	10	SMAP2;KLF15;LONRF1;TMEM204;GPRIN3;RNF144B;ARRDC2;EDN1;STARD3;CCDC85A
SCML1	10	BAZ1A;BTG3;HADH;CEPT1;ADCY9;SH3BP4;UTRN;MON2;THOC1;CHKA
SPON2	10	OAF;MRC2;CTSK;DPP4;PLXNA1;ECM1;ADAM33;MXRA8;COL6A3;MMP2
SYCN	9	REG1A;REG1B;CPA2;CLPS;CPA1;INS;KLK1;PNLIP;PLA2G1B
MYBPC1	9	ACTA1;MB;CKM;EEF1A2;KLHL41;TNNI2;MYLPF;TNNC2;MYL1
ID1	9	SOX18;EPHB4;ENG;SMAD6;ID3;NRARP;SNAI1;ELFN1;HEY1
HDC	9	RGS13;CPA3;NDST2;ENPP3;KIT;CMA1;SLC18A2;CTSG;MS4A2
HLA-DMB	9	CD74;HLA-DPB1;HLA-DRA;IL2RG;KCNAB2;PSMB9;HLA-DPA1;IL18BP;HLA-DMA
CPA1	9	SYCN;REG1A;REG1B;CPA2;CLPS;CPB1;INS;PNLIP;PLA2G1B
SQLE	9	SREBF2;SC5D;EBP;HMGCR;INSIG1;MVD;MVK;STARD4;DHCR24
CPA2	9	SYCN;REG1A;REG1B;CLPS;CPA1;CPB1;INS;PNLIP;PLA2G1B
TBC1D14	9	CLEC10A;RGL1;FAM20A;SLCO2B1;CD14;LGI2;HCK;F13A1;SPOCD1
MCL1	9	BTG2;FOS;FOSB;EGR1;CSRNP1;NFKBIZ;ZFP36;MYC;DUSP1
LCN10	9	NPDC1;TPST2;SLC9A3R2;GRK5;CDH24;LAMA3;ADAM15;HYAL2;ST6GALNAC1
TBX1	9	PROX1;TFF3;GPR97;PRKCZ;RELN;KBTBD11;CCL21;FAM189A2;PKHD1L1
C8orf4	9	ITPRIP;HLX;CDKN1B;SOX17;HBEGF;SPRY1;GRASP;SIK1;PDE4B
COX6A2	9	TCAP;ACTN2;ACTA1;MB;CKM;EEF1A2;MYL2;TNNC1;MYL1
MYLPF	9	ACTA1;MYBPC1;MB;CKM;KLHL41;TNNI2;TNNC2;MYL1;MYL2
KLK1	9	SYCN;RAP1GAP;FBXO2;FA2H;INS;CCDC64B;ESRP1;PLA2G1B;CLDN1
IDO1	9	ETV7;STAT1;CXCL9;WARS;RARRES3;UBD;SCO2;CXCL11;CXCL10
EGLN3	9	BHLHE40;LRRC32;RLF;ANKRD37;DLL4;ARRDC3;ALDOA;KDM3A;SLCO4A1
GPR146	9	GALK1;ERG;EFNA1;CPLX1;MFAP3;FAM110D;ADM5;CMIP;AGFG2
TNNT2	9	PMP2;ANKRD1;SORCS1;FOXD3;MYL7;TNNC1;CLDN1;MPZ;TNNI3
TMEM51	9	CSDC2;LGR6;USP2;RBPMS2;RERGL;GPR20;KCNA5;FOXC2;GPRC5C
KIAA1324	9	KRT77;AQP5;KRT23;DCD;SCGB2A2;MUCL1;GJB6;PIP;C5orf46
OAS1	9	CMPK2;EPSTI1;IFIT2;SPARC;OAS2;HERC5;HERC6;MX1;SAMD9
ODF3B	9	CD74;SAMD9L;IRF7;IFI27;IFITM1;EPSTI1;IFI44L;PSMB9;BST2
NLGN2	9	NFATC4;FKBP10;CALM1;NRSN2;PRPF40B;TCEA3;MYCBP2;IGFBP4;SNED1
CPLX1	9	GPR146;GALK1;CFI;TMEM255B;CAPN11;PPP1R35;ADM5;DUSP23;ABCD4
TNFAIP6	9	BDKRB1;DPYSL3;THBS3;CSF3;ANK2;ITGA11;MARCH3;TNFAIP2;HAS1
GPC3	9	PDGFRA;ADAMTSL1;SVEP1;TNNT3;BICC1;SLIT3;C1S;SMOC2;FBLN5
VIPR1	9	TMEM74B;RASSF4;PLAT;CILP;RGS5;AGAP2;ITM2A;SCN4B;HRC
REEP6	9	SLITRK4;PDHA1;QDPR;ALDH1L1;SAA4;ECHS1;RBP4;DECR1;GYG2
CD7	9	RASGRP1;ITK;SECTM1;CD69;RUNX3;PTPRC;ZAP70;CD8A;CD3E
FNDC5	9	MRC2;PCSK6;WSCD2;PTHLH;DACT2;FNDC1;SPSB4;FGF16;COL6A6
PLCH2	9	ANO9;CD5;RHOV;CCDC64B;RUNX3;ESRP1;LAD1;SERPINB5;LYPD3
SNRK	9	MEF2C;RASIP1;SIK1;CCRL2;EGFL7;DLL1;ADRB2;TMCC3;DUSP6
LDB2	9	EFNB2;EPAS1;PREX1;FCN3;SLCO2A1;CYYR1;RAMP3;KCTD12;PITPNC1
MTFP1	9	NEDD9;SIK1;ITPRIP;BHLHE40;TNFAIP3;CDC42EP3;ANKRD37;DDIT4;APOLD1
OLFM2	9	ACACA;PRRT4;TKT;ELOVL5;C19orf80;ME1;ACLY;FADS2;THRSP
ITGAV	9	CCDC107;RABAC1;CALU;GNG12;GPC1;BAD;SMYD2;TXNL4A;LGALS1
PTPN7	9	RAC2;CD48;IKZF1;MFHAS1;NUP210;GPR65;CCR5;DENND1C;TBC1D10C
HMCN2	9	RAB9B;DES;ACTG2;PDLIM3;TMEM35;KCNH2;MAMDC2;WFDC2;PTGFRN
ADA	9	CALHM2;TPST1;CILP;IGFBP6;DBN1;MMP27;SNX21;KCNIP3;HTRA3
RGS18	9	SERPINA1;AOAH;AMICA1;GPSM3;CCR2;PTPRC;CSF3R;SNX20;TLR8
CPXM1	9	MDK;FMO1;STMN2;PTX3;DPYS;CPZ;ITGAM;LSAMP;UBXN11
SORL1	9	SELL;IL18RAP;PROK2;MMP25;CSF3R;CMTM2;CYTIP;CST7;MXD1
SLCO2A1	9	FCN3;TEK;PREX1;PLA1A;LDB2;RAMP3;PKP1;ABCC4;SELP
RPGR	9	DOCK9;ZBTB16;MAP3K6;LRRC1;DENND3;MTUS1;FBXO31;EDN1;SERPINE1
MRAP	9	LIPE;PTPRF;DGAT2;PNPLA2;MGST1;GPD1;AGPAT2;MESP1;RBP4
TMTC1	9	EPAS1;TEK;HEG1;TACC1;S1PR1;TBX2;CYYR1;FAM107A;ST6GALNAC1
EFHD2	9	DOK2;HEG1;SH3BGRL3;ARHGAP30;ADAM15;THBD;GALNT7;LMNA;ZEB2
PINK1	9	FAM160A2;NDUFAF3;RXRA;APBB1;HSD17B8;CC2D1A;HAAO;CAPN1;PHIP
GIMAP5	9	LRRC8C;MECOM;MYCT1;ATP13A3;CLEC14A;SENP6;GIMAP4;FRY;GIMAP7
SPOCK2	9	SH2D1A;ITK;RUNX3;TRAT1;SH2D2A;CD5;CD6;ZAP70;CD3E
TMEM173	9	CSF2RB;SBNO2;ECSCR;ETS2;IFI16;HRH2;DARC;GRAMD1A;SEMA4B
IZUMO4	9	EPHX2;SLC7A6;DCXR;PCYT2;ADHFE1;ABAT;GPT;PXMP2;ABCD2
CAB39L	9	ELN;CLEC3B;TACC1;EIF4G1;UAP1;CYP4B1;FSTL1;SAMD4A;GSN
EDNRA	9	CSDC2;MYH11;AKAP1;MUSTN1;PDE3A;NPNT;GUCY1A3;GUCY1B3;SPEG
LGALS3BP	9	CUTC;SELENBP1;CCDC80;ECM2;MFAP4;IGFBP7;CLU;ARHGAP6;MAN1A1
C7orf41	9	NEK7;IGIP;EPB41L4B;CAT;DLAT;ATP9A;VEGFB;CHCHD10;ST6GALNAC6
PTPRS	9	RARA;LRP1;SLC7A6;PLA2G2A;WISP2;GPX3;ADHFE1;C1S;ASAP3
ZNF385B	9	CD70;SCARA5;CDS1;NOVA1;DCLK1;DKK1;PCDHGC3;DBN1;WNT10B
CHRDL1	9	LBP;NPR3;PODXL2;ECM2;EGFL6;RFTN1;MFAP4;C1S;CLU
SH3TC1	9	TSC22D3;PHC2;ITPKC;PRR16;FBXO31;ARRDC2;ABLIM2;IRAK3;SLCO4A1
PKP1	9	ENPP2;KIAA1462;TFPI2;JUP;SCNN1B;CTNNBIP1;SLCO2A1;SELP;N4BP3
H2AFX	9	MKI67;CENPM;CCNA2;CCNB2;PLK1;CEP55;SCAND1;AURKB;NUSAP1
EGFL7	9	SOX18;RASIP1;LHX6;SNRK;CARD10;KIF26A;SH2D3C;LYL1;DUSP7
FAM13C	9	TGFBR2;IFITM1;THSD7A;COL15A1;MKL2;CYYR1;LIFR;CXCL12;ANKRD29
BAZ2A	9	ATG2B;CHD6;CCNI;NR2C2;ZZEF1;ATXN7;ATF7IP;SETD5;BTAF1
RPS21	9	MRC2;ROMO1;ZNF438;RPLP2;FSTL1;GPR133;FBN1;PAM;RPL28
SLC1A3	9	CDC37L1;EGFLAM;ARID5B;SPG20;PIK3R1;CISH;NHS;IKZF4;ANKRD10
BATF	9	RGS13;MYO1G;CPA3;CMA1;GNA15;F13A1;WAS;HCK;IKZF1
CH25H	9	SRSF7;NR4A2;CDKN1A;IL6;CREM;STC1;RNF122;USP36;ARL5B
GYS1	9	SPHK2;FAM166B;PCYT2;ALDOA;SREBF1;PDK4;LDHD;GPT;SMARCD2
YJEFN3	9	SMPD3;CFI;QRICH2;CYYR1;GDPD3;ARL15;SGK494;RBM14;GIPC2
NRSN2	9	ACP5;NLGN2;GALK1;SOX12;PTX3;IGFBP6;IGFBP4;SMARCA1;ZNF512B
NPL	9	ACP5;SLC18B1;TFEC;TYROBP;IGSF6;IFI30;CCR1;MPP1;MSR1
PHLDB2	9	LRRC8A;C7orf63;PRR12;ELF1;UTRN;NOD1;CRLS1;ZFC3H1;CCDC85A
MASP1	9	SERPINA5;CLEC3B;CCDC80;ECM2;RGS5;SLIT3;ATP1A1;MAN1A1;HRC
GREB1L	9	SLITRK4;THAP8;KCNIP3;AC131097.4;KDM6A;STS;B3GALTL;CADPS;NDRG4
PLEKHG4	9	SCARA3;TRIO;C1QTNF3;ISLR;ECM1;FBN1;SLIT3;COL1A1;WNT2
C15orf38	9	ZACN;OSER1;DGAT1;KHSRP;HEXIM1;CXCR5;LSMEM1;CLK1;TRIM44
FILIP1L	9	RAB9B;PDLIM3;FILIP1;CYFIP2;TCEAL1;DNAJB4;PALLD;NEXN;PARM1
COL5A3	9	TIMP3;DENND2D;CALHM2;CAV1;PNMT;NDRG2;LAMC1;HRC;ANPEP
RARRES3	9	IDO1;STAT1;ETV7;PSME1;UBE2L6;PSMB8;NKG7;IL18BP;GZMA
C6	9	FAM198B;ACVR1C;DENND2D;PISD;DNAH9;LRRC16A;C20orf24;EGFL6;TMEM132C
OLFML1	9	MRC2;SCARA5;ISLR;OLFML3;ECM1;CILP;SLIT3;ADAM33;GLT8D2
PLA2G2A	9	SLPI;PTGFR;PTPRS;SCARA5;VCAN;SERPING1;NNMT;C1S;C1R
PELI2	9	CNNM2;PELI1;ARID5A;FBXL3;INPP4B;LRRC1;LDB1;FAM26E;UBALD1
RBM14	9	YJEFN3;SGK494;ZRANB2;CRY2;PDE9A;PGAP2;SMPD3;CRIP3;TMEM42
CTTN	9	PCNXL2;MTMR11;OGT;ARHGAP4;CYBA;SH3BGRL;SNX20;DPP4;TBXAS1
SSC5D	9	IL17D;TIMP2;FNDC1;CILP;GOLIM4;MFAP4;SLIT3;GAS1;COL16A1
MAGED1	9	MAGED2;PRAF2;YIF1A;KDELR3;ALDH18A1;CUL7;C12orf23;P4HB;CKAP4
MYH14	9	PPP1R1A;PPP1R1B;GPT2;PTPRF;PCBD1;EPB41L4B;CALB2;PC;PLIN1
LHX6	9	DOC2B;MFNG;EPHB4;SEMA3F;CARD10;EGFL7;SPNS2;EHD4;AFAP1
TGFB1	9	EFHD1;SOX13;CD2AP;MEF2A;ARHGDIB;SEPT8;PYCARD;ENOSF1;CRIP2
RGP1	9	PPM1F;RBFOX2;UNC119B;NDST1;EXTL3;YKT6;TBC1D13;GIMAP6;KLHDC10
SDC3	9	AMOTL1;CUTC;PDE1B;EXTL3;GNAZ;TNIP1;ABCB6;RHOBTB1;ABHD5
IL17D	9	FAM180B;SSC5D;CILP;UST;TTC7A;GAS1;COL16A1;PAM;GSN
CEBPD	9	JUNB;PNRC1;CDKN1A;MAZ;SCAND1;NFIL3;CLDN5;KLF9;BTG2
ZMIZ1	9	RP11-1055B8.7;TEK;HEG1;KIAA1671;GSE1;EBF3;ZNF423;TEAD3;ITPR3
EPM2A	9	NCKAP1L;PELI3;KCNH2;GLA;NCS1;RNF180;JPH2;PRKACB;WFDC2
IL1R2	9	SERPINA1;ALOX5;SELPLG;PTK2B;CSF3R;HCLS1;SAMSN1;SLA;CD300E
LAMB2	9	MAP1B;CLUH;EIF4G1;CCDC80;CALU;CLSTN1;UBTD2;PPIC;PAM
PDK2	9	HADH;APMAP;FAM198B;CCDC107;FMNL2;HDDC3;PEX19;TNIP1;MBNL1
COBL	9	B4GALNT4;RAP1GAP;SOX10;ITGB8;FA2H;PLEKHB1;SOX8;CLDN1;ARHGAP39
PGP	9	HMBS;C20orf24;ODC1;ZMAT1;STX10;TEX261;FAM229A;ENTHD2;HES6
MCC	9	NR3C2;TEK;PREX1;LNX1;CCDC68;ARHGAP31;DACH1;FGF12;HEY1
ACTC1	9	HSPB3;LTBP1;RYR2;WFDC1;TRIM54;P2RX1;GABRA4;ITIH3;MYOZ1
PRRG3	9	SCARA3;MRC2;FAM180A;MMP2;TCEAL1;OGN;PIEZO2;DPP4;COL6A6
DKK2	9	PODN;WSCD2;LTBP2;KCNH2;ZFHX4;FNDC1;PDGFRL;ANGPTL5;PTPRD
FAM212A	9	LYL1;ADAMTS9;SMAD1;AHDC1;N4BP3;LRRC8A;BCL6B;DUSP7;PRKD2
MVP	9	C1R;TRAFD1;HDAC7;CSF1;LRP1;CLU;SNED1;ADM5;AGTRAP
FHL3	9	PRKAB2;VCL;PALLD;CDYL2;TGFB1I1;TEAD3;LRRC8A;SERPINE1;ZYX
TMEM139	9	BAG3;NPR3;FAAH;PISD;SLC7A4;EGFL6;SCRN2;TSPAN8;HTRA1
EED	9	ZRANB2;PNISR;KL;CCDC85A;CLK1;LSMEM1;CYYR1;ZFC3H1;LUC7L3
EVC2	9	DCN;LAMA2;FBXL7;FBN1;STARD9;TTC7A;STK38;DBN1;ZNF438
CTNNBIP1	9	PTPRN2;ABLIM3;SGK223;ZRANB2;KIAA1462;PKP1;TNN;CDH5;CCDC85A
GJA5	9	KLF11;GNAZ;PALMD;FABP4;PDK4;NMT1;SCN4A;ADAMTS18;ZNF697
SNAI2	9	AHDC1;LRRC8A;AXIN2;ZNF703;UBTD2;ANPEP;LOX;SMARCD2;PDK4
THAP8	9	NPR3;ALDH4A1;CDKN1C;TLE2;SLC7A4;LMCD1;PISD;UCP2;GREB1L
MEF2D	9	KLHL26;TIMP3;CDKN1B;SOX13;ATF7IP;RAB3A;LRRC8A;RASAL2;CDC7
LPPR4	9	IGFBP2;SEMA5A;REM1;CHSY3;INPP4B;CD4;TRPC6;PRSS35;NCKAP5
FLYWCH2	9	FAM69B;PIP5K1C;TACC1;MGLL;RASSF4;RGS5;TSPAN7;ANGPTL1;CRIP2
DGKG	9	DBNDD2;AKAP6;JPH2;SH3BGRL;RBM24;MYOCD;REEP1;ITIH3;PPP1R12A
IFRD1	9	ZNF629;ATP13A3;MLLT1;HSPB8;BAMBI;CLK1;OSER1;RPRD2;PSME4
SNX33	9	KCTD11;SMAD3;UBTD2;ADRB2;PDK4;PPP1R18;UCP2;FGF11;LOX
AOC2	9	P2RX6;ORMDL3;ASPH;BTD;C19orf80;ACVR1;KIAA1239;MAPKAPK3;CAV1
CNTN3	9	STIM1;CUTC;CCDC80;BICC1;COL5A2;ANPEP;PCOLCE;COL6A3;COL6A2
CHST7	9	MAML2;BMP2;PPM1L;RAMP2;RGS5;UBALD1;CST3;KITLG;MAN1A1
KIAA1217	9	TCF4;AIF1L;LNX1;CADM2;MFSD6;ABLIM3;KALRN;SCN4A;SHANK3
ZFHX3	9	ZBTB7C;WASF3;ATP10A;ROCK2;CILP;FOXO1;MBNL1;CD248;ABCC1
SCARA3	9	FAM180A;PLEKHG4;PRRG3;SNX9;NT5E;PLEKHM2;TCEAL1;DPP4;PPP1R14A
ABHD6	9	BMP6;SDPR;SIK1;SGK223;ZBTB18;CCRL2;FAM117A;TMCC3;MEOX2
PIP5K1C	9	CNST;PDLIM7;PLXNA2;DNAJB5;MEF2A;VASP;ITPR1;FLYWCH2;ZYX
CREB3L1	9	PODN;BMP1;LRRC17;GLUL;COL1A2;PIK3R1;COL1A1;IGDCC4;ARHGEF26
SLC6A6	9	TSPAN18;RAVER2;PREX1;ENPP2;CCDC68;CRHBP;RAMP3;XPR1;HEY1
MEF2A	9	TGFB1;PCED1A;CALM1;PIP5K1C;CCDC68;CD2AP;CLEC14A;NES;CRIP2
IMP3	9	LGR4;MRPL34;ZNF628;CCR10;NOTCH1;IRF2BPL;PRR12;FBXL15;CBX4
CPSF4	9	CDC37L1;CENPO;ARID5B;ADCY3;SERPINB8;GLUL;NNMT;EDEM2;IL1R1
MGST1	9	CDKN2B;RTN4;ASPH;MRAP;RBP4;GPX4;ATP9A;PYGL;LDHB
UBTD2	9	TSHZ3;FSTL1;COL5A2;STK38;SNAI2;CMTM3;SNX33;LAMB2;DDAH2
SNX9	9	SCARA3;VAT1;GALNT12;NT5E;SPARCL1;CRYM;CAPN2;NGFRAP1;DPP4
CD22	9	DNASE2B;IGSF6;PIK3R6;ST14;WDFY4;SLC29A3;CD300LB;SIGLEC6;C11orf45
PNLIP	8	SYCN;REG1A;CPA2;CLPS;CPA1;CPB1;INS;PLA2G1B
CLPS	8	SYCN;REG1A;REG1B;CPA2;CPA1;INS;PNLIP;PLA2G1B
PER3	8	ARNTL;NTN4;CRY2;CAMKK1;TEF;HLF;DBP;NR1D2
XPO1	8	MKNK2;HMGB2;SLC36A4;SLC2A4RG;SLC3A2;MGEA5;ODC1;CEP95
SHFM1	8	CIRBP;BAD;PTMS;UBALD2;MBD3;RPLP2;ATP5E;SF3A1
INS	8	SYCN;REG1B;CPA2;CLPS;CPA1;KLK1;PNLIP;PLA2G1B
SNAI1	8	SOX18;MIDN;RASIP1;C20orf112;NRARP;ID1;DLL1;ADRB2
GADD45B	8	FOSL2;BHLHE40;CDKN1A;JUNB;ZFP36;ITPKC;SLC25A25;NFIL3
FCN1	8	SELL;SERPINA1;AOAH;LST1;AMICA1;CCR2;ASGR2;CD300E
IL2RB	8	GZMA;CX3CR1;GZMM;GNLY;LTB;ZAP70;SAMD3;NKG7
KRT5	8	LY6D;LYPD3;DCD;CALML5;SFN;TACSTD2;S100A14;FXYD3
EBP	8	DBI;FADS2;NSDHL;DHCR7;MVD;ACLY;MVK;SQLE
GPR20	8	LGR6;TOB1;LINGO1;USP2;TBX2;LRRC10B;GPRC5C;TMEM51
ANXA1	8	SEMA3C;ANXA5;STK40;ALDH3A2;CRYAB;S100A10;LMNA;S100A6
IRF7	8	PARP9;ETV7;ODF3B;EPSTI1;MX1;IFI44L;ISG15;SCO2
MAMDC2	8	DBNDD2;DPYSL3;LIMS2;TPPP3;ITGAM;ANGPTL1;HMCN2;CORO6
TMEM259	8	NME3;MAZ;FAM173A;SCAND1;FBXL15;MAP1LC3A;HES4;DPP7
EFNB2	8	EPAS1;TEK;PREX1;S1PR1;RAMP3;LDB2;PIK3R3;HEY1
C14orf80	8	NFATC1;NFATC2;DPYSL3;FOSB;RFX2;SKIL;EMP1;LMNA
DHCR24	8	PCYT2;ASPH;DHCR7;SREBF2;MVD;INSIG1;FADS2;SQLE
PLXDC2	8	ANTXR1;TIMP2;MMP2;ASPN;ANGPTL5;MXRA8;MEGF6;LTBP2
ANKRD1	8	ACTN2;TNNT2;MB;MYL7;MYL2;TNNI3;NPPB;NPPA
THY1	8	FKBP10;PLOD1;SLIT3;COL5A2;COL1A2;PCOLCE;COL3A1;COL6A2
SREK1	8	LTV1;PNISR;HEATR1;TIA1;TP53BP1;MYSM1;SRSF11;PAXBP1
MRGPRX2	8	RGS13;CPA3;CTSG;PIK3R6;SIGLEC6;KIT;MS4A2;HPGDS
AOAH	8	FCN1;AMICA1;RGS18;CCR2;PTPRC;CSF3R;LIMD2;SNX20
PRKCZ	8	APBA2;THSD4;DSP;TFF3;TBX1;FAM84A;PROX1;PKHD1L1
PNRC1	8	C10orf10;N4BP2L1;ARID5B;CEBPD;CCDC71L;NAV1;NNMT;NFIL3
ARG1	8	SELL;IL18RAP;LCN2;VNN2;S100A8;CSF3R;MMP25;S100A12
COMTD1	8	ZNF865;TRAPPC5;SCAND1;TMEM160;FBXL15;AL807752.1;PRKCDBP;CCDC85B
NDUFB7	8	ROMO1;ISOC2;CCDC107;UQCRQ;SCAND1;COX7A1;LGALS1;MYL9
MSC	8	OSGIN1;SNCG;C10orf90;FADS3;TXNRD1;UCHL1;FGF1;ABCC3
ANXA5	8	ANXA1;SH3BGRL3;CAPN2;S100A10;LGALS1;S100A6;TNFRSF12A;HTRA1
COL14A1	8	SFRP4;ASPN;SULF1;PAM;OGN;BGN;ABI3BP;LUM
NES	8	TSPAN18;ZBTB46;PLXNA2;MYH9;MEF2A;ETS1;ESAM;SLC9A3R2
CRYM	8	MMP14;VAT1;CTSK;GALNT12;MMP2;SNX9;FAM102A;DPP4
FAM43A	8	PPM1F;PDGFB;NDST1;ROBO4;KIF26A;SMAD1;RPS6KA2;N4BP3
LGR4	8	IMP3;UAP1;HTRA3;NOD1;GFPT2;PLAGL1;HAS2;PROCR
KLF15	8	ZBTB16;PAG1;CCND3;PPARG;PER1;IFNGR1;FAM214A;TSC22D3
BTK	8	PLCB2;NCKAP1L;NCF4;DOCK2;VAMP8;PIK3R6;ITGAM;PTPN6
ALPK2	8	ADAMTSL1;DKK1;PDE7A;COL1A2;COL1A1;SMOC2;MMP27;COL6A6
ZMYND15	8	CD72;SDS;CYP27A1;PLA2G7;THEMIS2;VMO1;CD300LB;MSR1
MGAT3	8	ANKRD53;ADCY3;KIRREL;ADRA2A;MIEF1;IFNGR2;RTN4RL1;PHLDA3
ZNF428	8	EVA1B;ZNF865;TRAPPC5;FAM173A;SCAND1;TMEM160;FBXL15;CCDC85B
SPOCK1	8	MMP14;RECK;LTBP2;SLC43A3;PPL;NAV2;DPP4;FBLN5
PSMB10	8	STAT1;WARS;EPSTI1;PSME1;UBD;PSMB9;PSMB8;IL18BP
ZDHHC17	8	YTHDC1;ZRANB2;FUBP1;SLC25A36;MYSM1;PHIP;GORAB;DMTF1
KCNIP3	8	PROK1;NPY2R;ADA;B3GALTL;HDHD1;MBNL3;GALNT2;GREB1L
NPY1R	8	SIM1;DMD;EGFL6;DAAM1;CCDC3;PALLD;MBNL2;ANGPT1
PPP1R35	8	CDKN1B;H1FX;FRS3;CPLX1;FBXL15;ARID4A;ATPIF1;CCDC85B
TPO	8	HIPK3;LAMA3;CLIC2;PLAT;FAM107A;NPDC1;ADAM15;ST6GALNAC1
GPC1	8	CCDC107;FADS3;ITGAV;SORT1;IL17RE;S100A6;UCHL1;LGALS1
NRGN	8	MAP2;PTK2;RBPMS2;TBX2;FOXL1;RERGL;CARNS1;SORBS2
VNN2	8	SELL;IL18RAP;ARG1;C19orf59;S100A9;S100A8;CSF3R;S100A12
CHRDL2	8	GREM2;TMEM61;KCNH2;PPP2R2C;HTR2A;TRPC4;SYNDIG1;HSD17B6
RGS1	8	GPR183;SDS;CXCR4;CD69;TFRC;GNA13;TREM2;KLF9
GPR56	8	C17orf72;EHD4;SGK223;ROBO4;CASKIN2;ICAM2;ZBTB46;SCN4A
MYO1B	8	IGFBP2;FAM162B;TUSC3;COL18A1;PEAR1;COL5A2;SPARC;TRPC6
CSRNP3	8	CCDC102B;SLC7A2;CHSY3;CD4;GUCY1A2;PRSS35;NCKAP5;PARM1
CPXM2	8	NPDC1;CFI;SULF2;LY96;IL33;DARC;ADM5;SELP
TMEM158	8	HSPB3;TMEM61;KCNH2;CCDC81;PRKAG2;CPNE6;PCDH7;MAP6
SCNN1G	8	BACE2;NAGS;MECOM;ENPP2;FBXO31;GRB7;CLDN5;SCNN1B
ANKRD28	8	FAM180A;TRIO;MSRB1;ECM1;CACNB4;APPL2;COL6A3;SETD5
DDX17	8	ZRANB2;OGT;DMTF1;ARGLU1;PNISR;ZNF512;ZFC3H1;LUC7L3
MAPK13	8	CYP27A1;CALM3;DHRS9;BRPF3;PLA2G7;ABHD8;GPC4;MAPKAPK3
CD300LF	8	CCR5;CD48;FGR;AQP9;IL24;LTA4H;C19orf38;LY86
MARCO	8	RNASE1;LYVE1;VSIG4;PLTP;F13A1;MYO7A;SIGLEC1;FOLR2
FAM173A	8	TMEM259;SCAND1;TMEM160;FBXL15;PDF;C4orf48;CCDC85B;ZNF428
BMPR2	8	NPDC1;ARHGAP31;RAMP3;CYYR1;HIPK3;PTBP3;NUDCD1;DARC
BBS10	8	EGFLAM;PPM1L;ATP10A;DDR1;CISH;RGS3;PHLDA3;ARHGEF26
SH3BP1	8	SPI1;LST1;SASH3;ARHGAP30;CARD9;NRROS;LYN;CYTH4
LDOC1L	8	TSPYL4;MESDC1;FAM168B;ZNF629;UNC119B;KIRREL;FADD;GIMAP6
USP13	8	SDPR;HMGB2;TSPAN13;PDE2A;SCNN1B;ABLIM3;CA4;WFS1
FES	8	SBNO2;RALGDS;RHOU;CSF3;ETS2;MLKL;SAMSN1;BCL3
METTL24	8	RAB9B;FAXC;HSPB3;KCNH2;RNF180;CPNE6;FAT3;HSD17B6
B4GALT5	8	RARA;PPRC1;IFI16;ZNF436;FAM110D;TGFB1I1;DACT1;BCL3
FGD1	8	FKBP10;KIRREL;SOX12;MAZ;NYNRIN;FAM109B;DOK4;CKAP4
CCND3	8	KLF15;HYAL2;AVPR2;TMEM204;LIFR;ABI3;NTHL1;MMP28
PCNXL2	8	MMP14;FAM180A;CCDC39;PAMR1;PPL;CTTN;DBN1;DPP4
RNPEPL1	8	STK40;RRP9;ZNF219;PARD6A;MBD3;CIRBP;CCNI;BSCL2
NKAIN4	8	PMP2;EMILIN3;SFRP5;BIRC7;COL9A3;GFRA3;AATK;BCAS1
GATSL3	8	ZBTB40;KLHL26;HYAL2;SPARCL1;LGI4;SMARCD2;DENND3;GRASP
UBALD1	8	ZBTB10;BMP2;PELI2;FBXL3;PLEKHF2;DNAJB4;SCAND1;CHST7
FAM213B	8	RPS6KA2;MFNG;CARD10;PEAR1;HOXB7;KIF26A;ZNF792;CBX2
PSTPIP1	8	NCF4;DOCK2;HK3;ALOX5;SELPLG;ALOX5AP;ARHGAP9;ITGAM
NAT8L	8	TM7SF2;ACVR1C;ALDH2;PTPRF;GYG2;C12orf39;PLIN1;ORMDL3
SLC7A4	8	APMAP;C20orf24;THAP8;TMEM139;HSPB8;EGFL6;CD248;HPD
NCAM1	8	SCN7A;PMP2;SORCS1;NRXN3;RIC3;PLEKHB1;SLIT3;AATK
CSF1	8	MVP;AOX1;AMOTL2;HDAC7;CALHM2;CYP4B1;RUNX1T1;NUMBL
CD9	8	NCEH1;CAPG;SH3BGRL3;SDS;ALCAM;PLD3;KCNN4;S100A6
MCM6	8	ANKRD53;KIAA1239;SLC27A2;TNIP1;C19orf80;GART;ABHD5;CAV1
NTN1	8	CD70;SEMA3D;PIEZO2;ACKR3;ANGPTL5;CCL21;DPP4;PKHD1L1
PI15	8	RAB9B;KCNH2;TMEM35;CPNE6;BCHE;MAPK4;SLC8A1;HSD17B6
DIRAS1	8	HSPB3;KCNH2;WNK2;CPNE6;MCHR1;HOXC13;BCHE;LGI3
STX4	8	DNASE2B;TFRC;ALCAM;SELPLG;AGPAT4;PLTP;MYO9B;GNA13
ZNF512	8	DDX17;ZRANB2;FUBP1;C5orf54;ATAT1;ZFC3H1;LUC7L3;FRMD3
PIP4K2C	8	MRC2;WDR1;CAMK2G;ECM2;PXN;MAGEE1;SAMD4A;TESK2
RAB23	8	RAB9B;CYFIP2;CCDC81;PDLIM3;PALLD;SHROOM3;YWHAH;PDLIM7
MLLT1	8	ACADVL;PSME4;NPNT;PYGB;POLR2A;SF3A1;RPRD2;IFRD1
PYGB	8	SYNM;FAXC;WNK2;CPNE6;MLLT1;JPH2;DTNA;FLNA
CHML	8	ASPHD1;SDS;SPOCD1;SDC2;GPC4;MYO9B;IFITM10;OPN3
S100P	8	AQP5;FXYD3;LCN2;KRT23;GJB6;CCDC64B;PADI2;S100A12
P4HA2	8	FAM180A;RCN3;CALU;LUM;COL5A2;COL5A1;MYD88;SASH3
TESC	8	DUSP23;CFI;TMEM255B;CYYR1;COX4I2;ADM5;NDUFA4L2;CMIP
FAM214A	8	KLF15;LONRF1;YPEL2;RRP1B;TSC22D3;ZBTB16;KLF9;SESN1
MPP3	8	LOXL2;PLOD1;DENND3;SPARC;STX12;COL4A1;DDAH1;CAV1
DPYS	8	LSAMP;STMN2;CPXM1;MCOLN3;BPIFB4;DPEP1;GAS7;UBXN11
CELF2	8	DCN;LRRK2;STXBP6;EGFR;VIT;EMP1;LPAR1;FBLN5
ROMO1	8	CALM1;NDUFB7;RPS21;TRAPPC5;UQCRQ;H2AFJ;ATPIF1;ATP5E
CLSTN1	8	NIT2;DPYSL2;JAM3;GSAP;RECK;PPP1R9A;LAMB2;PAM
KDR	8	NR3C2;EFNB1;ZBTB46;SGK223;ETS1;RAPGEF2;TM4SF18;CDH5
FAM168A	8	DAGLA;RPS6KA2;SGK223;GPIHBP1;NYNRIN;FCHSD2;PPP1R16B;MXD4
RRP9	8	WDR43;PPAN;MYBBP1A;CALU;YKT6;RNPEPL1;SMYD2;MGAT4B
CRIM1	8	BMP6;PDGFB;MYRIP;MYH9;ROBO4;CTGF;ERG;ABCG2
DOK4	8	DCHS1;FGD1;SOX12;MAZ;NYNRIN;MGAT4B;ARAP3;ZBTB21
GRK5	8	TRNP1;EFHD1;TIMP3;MFGE8;INPP4B;LCN10;ELN;ANGPT1
CNST	8	PELI1;PIP5K1C;CDK17;MYL6;HBEGF;ANGPTL1;USP31;STK38L
IL12RB2	8	LYVE1;SDS;RGL1;DCSTAMP;AGPAT4;SLAMF9;F13A1;SPOCD1
ABLIM2	8	NAGS;MECOM;PDIA5;EFNA1;SCN1B;FBXO31;AGFG2;SH3TC1
FZD6	8	MECOM;GNG11;HOXD1;CD93;ERG;BMX;CDH5;S100A16
MID1IP1	8	RERE;MMP17;ACACA;ACSS2;SREBF1;MGAT4B;ACLY;THRSP
NINJ2	8	PODN;DDR1;PPAP2B;ADCY3;WNK1;SIDT2;ZNF423;C1orf21
MYCBP2	8	LRP1;NLGN2;SVEP1;PLXNA4;NNMT;C1R;PCDH18;TMEM47
P2RY14	8	RNASE1;IL10RA;RNASE6;TACC1;CSF1R;KCNQ1;RGS5;ALOX5AP
CKB	8	ASB2;TRAF1;HSPB3;KCNH2;CPNE6;PCDH7;FAT3;SMTN
PIP5K1B	8	LGR6;ZBTB7C;RBPMS2;USP2;KCNAB1;SORBS2;LRRC10B;GPRC5C
SECTM1	8	IFITM1;LAMA4;ETV7;PLSCR1;IFI16;CD7;PSMB8;SP110
DTX1	8	MDFI;G0S2;APMAP;AQPEP;PNPLA2;HEBP2;KIAA0922;TMEM132C
DHH	8	PMP2;SFRP5;SOX10;FOXD3;COL9A3;CLDN1;MAL;PTPN5
NGFR	8	APOD;GRIK3;IFITM1;ANGPTL7;C1S;PTGDS;DACT1;LZTS1
PRKAR1B	8	NEURL1B;PRKCH;EHD4;ECSCR;CFI;AVPR2;CARD10;KIF26A
LSMEM1	8	TMEM81;C15orf38;HEXIM1;EED;CLK1;TRIM44;ACAD11;ZFC3H1
EMCN	8	PLVAP;PRKCH;RASGRF2;MYCT1;CD93;CYYR1;ESAM;DACH1
DMPK	8	TRAF1;RASL11B;MACF1;VCL;ITGA5;CTIF;FLNA;STK38L
CHPF	8	SLC35F5;DNAJB9;B3GNT9;C11orf24;YIF1A;KDELR3;C12orf23;PIK3AP1
HLA-DPB1	7	CD74;HLA-DRA;B2M;PSMB9;PSMB8;HLA-DMB;HLA-DMA
COL4A2	7	LOXL2;COL18A1;HSPG2;NID1;SPARC;COL4A1;COL6A2
MMP9	7	ITGB2;CHIT1;SPP1;FBP1;TREM2;MMP7;MATK
CCL21	7	NTN1;MMRN1;TFF3;TBX1;GPR97;PROX1;PKHD1L1
SPP1	7	IL1RN;ALCAM;CHIT1;MMP9;TREM2;MMP7;MATK
SREBF2	7	SC5D;MVD;HMGCR;ABCA1;MVK;SQLE;DHCR24
CBX6	7	PPM1F;ARHGEF16;UNC119B;KIRREL;EXTL3;CBX7;TBC1D13
MARC1	7	PFKFB1;ACSL1;LPL;GPD1;AGPAT2;PLIN1;GYG2
FOSB	7	C14orf80;FOS;EGR1;JUND;NFKBIZ;MCL1;ATF3
ATP5E	7	SHFM1;ROMO1;RPLP2;UQCRQ;POLE4;MBD3;UBALD2
ARGLU1	7	DDX17;ZNF248;PNISR;SRSF11;ZNF574;ZFC3H1;LUC7L3
JAG1	7	PTK2;GUCY1B3;RCAN2;TBX2;FHL5;LBH;SORBS2
MBP	7	PMP2;DRP2;MT3;PAQR6;PLEKHB1;PLP1;BCAS1
JUND	7	FOS;FOSB;JUNB;JUN;SCAND1;DUSP1;ATF3
SERPING1	7	IFITM1;LRP1;SVEP1;PLA2G2A;GPX3;C1S;C1R
KDM6A	7	SLITRK4;HDHD1;KDM5C;AC131097.4;STS;GREB1L;GYG2
SLC18A2	7	RAB37;RGS13;CPA3;KIT;HDC;SIGLEC6;HPGDS
CAMK2B	7	PGBD5;DOCK3;ASPHD1;CD300LB;DAB1;IFITM10;MATK
BCL6B	7	RASIP1;FAM212A;PCDH12;N4BP3;SH2D3C;TNFRSF4;PRKD2
SCG5	7	LAMA1;GREM1;MTSS1L;UAP1;CILP;KIAA1199;GSN
RUNDC3B	7	TEK;CDH24;ABCB1;ARL15;ST6GALNAC1;DACH1;ANKRD29
TNNC2	7	ACTA1;MB;CKM;KLHL41;MYLPF;MYBPC1;MYL1
CDK18	7	AKAP6;DOCK3;CTSD;FSTL1;ITIH3;HTR1B;RIMS3
KCNIP2	7	TUSC5;PLA2G16;C1orf213;FABP4;GPD1;GYG2;CIDEA
NFATC2	7	C14orf80;TPPP3;RFX2;ANK2;WNT9A;LMNA;GAS7
EDEM2	7	YPEL5;DDR1;SLC39A14;C1QTNF1;IFNGR2;CPSF4;PROCR
ABCB1	7	LAMA3;MAML2;CDH24;TRAK1;RUNDC3B;SLC9A3R2;ST6GALNAC1
ZIC1	7	C5orf38;NRN1;HOXB3;MAB21L1;HAND2;EYA2;IRX2
CARNS1	7	PRDM16;LGR6;BRSK2;NRGN;PRPH;TBX2;RERGL
TCAP	7	ACTA1;MB;CKM;EEF1A2;MYL2;MYL1;COX6A2
ENO1	7	KDM3A;ITGA5;PFKP;GBE1;ALDOA;ADAM9;ZNF395
ACADVL	7	TMED5;ATP13A3;MLLT1;ECH1;FABP4;PDK4;SPOCD1
WARS	7	IFIH1;IDO1;PSMB10;PSME1;UBE2L6;CXCL11;IL18BP
MS4A1	7	GZMM;CD27;RLTPR;GZMK;CD3E;LY9;CD79A
LGI3	7	PCP4;DIRAS1;PRKCB;MCHR1;SYNM;SLC8A1;DAB1
BICC1	7	PDGFD;ADAMTS3;SVEP1;CNTN3;GPC3;C1S;C1R
MAF	7	RNASE1;STAB1;LYVE1;CSF1R;SLCO2B1;F13A1;SIGLEC1
CCDC39	7	HSPA13;AUTS2;PCNXL2;RUFY3;PEAR1;ABCA6;DPP4
SLC26A10	7	MYH11;TPM2;COL4A5;FLNA;SPEG;ITIH3;ARHGEF25
RARG	7	MAP1A;CALHM2;GLIS2;KIRREL;TRAM2;WNT9A;PPP1R9B
VSNL1	7	RAB25;TFAP2C;GJB6;FBXL16;ZNF750;SERPINB5;LYPD3
FAP	7	LAMA1;VDR;OMG;COL8A2;CTSK;ANTXR1;MMP2
RGS19	7	LYL1;RASSF3;GPSM3;PRKACB;SH3BGRL;VASP;SASH3
TMEM2	7	DAGLA;UGCG;RUNX1;MINA;ADAMTS9;NNMT;NOD1
PARP12	7	IFIH1;PARP9;TRIM21;PSME1;ISG15;DDX60L;IFIT2
SOD3	7	TLCD2;HSPB6;CFD;NTRK2;TMEM160;KLF2;MAP1LC3A
ERRFI1	7	ZBTB16;TSC22D3;SPRY2;PER1;TXNIP;FEM1C;KLF9
RUSC2	7	VASN;PLSCR1;LCAT;CORO1C;DLGAP4;FADS3;TNFRSF12A
TMEM74B	7	SELENBP1;AGAP2;COX4I2;TPPP3;ATP1A1;VIPR1;SCN4B
XPR1	7	NR3C2;TEK;SLC6A6;SH3BP4;DACH1;FRMD3;HEY1
ETV7	7	IDO1;IRF7;PARP9;STAT1;CMPK2;SECTM1;RARRES3
COL12A1	7	DCN;RECK;AUTS2;THBS2;LAMC1;ZEB1;ITGBL1
SCFD2	7	FARS2;CEBPG;VARS;MEF2C;SRBD1;SF3A1;EXOSC5
MON2	7	MTF2;ARHGAP31;ABCA5;CLK1;THOC1;SCML1;GIMAP6
IRF2BPL	7	MIDN;SOX18;PIM3;IMP3;NOTCH1;CLEC14A;CBX4
PGF	7	WSCD1;LRRC8A;PDGFA;PCDH1;SMAD1;AHDC1;N4BP3
PPIC	7	CCDC80;COL5A2;SPARC;IGFBP7;PRSS23;COL3A1;LAMB2
MAP3K8	7	ETS2;ARID5B;ARID5A;NFKBIZ;ZFP36;NNMT;FOSL2
NFIX	7	FAM180A;PCDHGC3;TEAD3;CORO2B;NCOR2;CREBBP;FGFR1
C10orf10	7	PNRC1;TLDC2;ITPKC;ZNF22;SLCO4A1;KLF9;ARID5B
PTX3	7	PPM1L;PDGFD;CPXM1;NRSN2;GRIA1;SVEP1;KIAA1199
NSDHL	7	FCN2;CLMN;DHCR7;DLAT;EBP;SLC29A2;ACLY
C12orf5	7	NCEH1;C20orf24;TFEC;ALCAM;CD300LB;APOBR;SH3BGRL
HHEX	7	RASSF9;IRF2;LYL1;ANXA2R;NUAK1;SMAD1;GIMAP7
CRHBP	7	BACE2;SLC6A6;SLC9A3R2;PPM1H;TCF15;HECW2;FGF12
ARHGAP12	7	FAM180A;PLSCR1;ACAP3;SF3A1;TNRC6A;GNRH1;RASA2
PDGFRB	7	MMP14;FAM180A;PCDHGC3;FKBP10;TRAM2;COL6A1;COL6A3
RASGRP2	7	CACNA1H;INPP5A;EFHD1;ARHGEF17;TBX2;SMARCD3;RCSD1
SERTAD3	7	PIM3;BHLHE40;CDKN1B;JUNB;CSRNP1;ERF;HES1
MGP	7	LTBP2;OMD;ISM1;RASSF4;CILP;CST3;GDF10
LPAR5	7	DOK2;PTPN6;CYBB;ITGAM;CD200R1;HPGDS;BLNK
ANG	7	PAPSS1;APMAP;PDE1B;DNAH9;L3MBTL1;CRLS1;KIAA0922
FOXC1	7	JUNB;LRRC1;IRF2BP2;RAB2A;CLEC14A;FRY;DUSP1
PYCR1	7	SLC38A5;NCKAP1L;FKBP10;COL1A2;COL1A1;SEC61A1;CKAP4
ADAM33	7	SPON2;SCARA5;OLFML1;ISLR;DCLK1;ACAP3;COL16A1
COX14	7	AQPEP;G0S2;PCK1;TP53I13;PLA2G16;APMAP;RP11-863K10.7
NR2C1	7	NHSL2;CCDC84;MGAT2;SF3A1;ZUFSP;GLMN;CLK1
IL4R	7	BACE2;EFNB1;IFI16;ZNF697;ZNF385D;TBX3;ITPKC
CDC7	7	LMNB1;CDKN1B;ZBTB18;IFI16;CDK2;MEF2D;DACH1
ITPR1	7	PIP5K1C;RAMP3;ADRA2C;JPH2;PALLD;DTNA;LMOD1
STARD3	7	ABCG2;LRRC8A;MMP28;SLC25A30;PNMT;GLTPD1;IFNGR1
TSPAN18	7	PRKCH;SLC6A6;SLC9A3R2;KIAA1671;PODXL;PTPRB;NES
ADAP1	7	CD53;SPI1;DOCK2;PIK3R5;STXBP2;SNX20;PIK3AP1
CDC45	7	E2F1;BUB1B;PKMYT1;CDCA5;MYBL2;ASF1B;IQGAP3
TCF15	7	RASIP1;ZBTB46;SLC9A3R2;CRHBP;CASKIN2;HECW2;SCN4A
FMNL1	7	LTBP4;SERPINA5;RASSF5;EMP3;ATP2B1;DBN1;GSN
CYP4F22	7	GPAM;ACACA;PPARG;GYS2;C19orf80;INSIG1;THRSP
NT5E	7	SCARA3;RECK;SNX9;PPL;NOVA1;DPP4;ISLR
GREM2	7	TMEM61;PDE4D;PPP2R2C;PCDH7;SHROOM3;CHRDL2;SYNDIG1
TGFBI	7	STAB1;LYVE1;KCNQ1;COLEC12;F13A1;FOLR2;PROCR
DCHS1	7	PPM1F;ARAP3;NYNRIN;FAM109B;TFRC;DOK4;GIMAP6
SLC44A2	7	PRKCH;EHD4;CD93;PTK2;ARHGDIB;FAM129B;THOC1
HMGB2	7	XPO1;H1FX;FRS3;PDE2A;USP13;PIK3IP1;ODC1
TTC18	7	BAIAP2L2;C1orf213;ZMAT1;ZCWPW1;SMPD3;GABRE;PLIN1
MCU	7	PDLIM7;VCL;ILK;NEXN;FAM26E;VASP;GPR176
SORCS2	7	FZD1;EMILIN3;TSPAN11;ANGPTL7;ADAMTS14;ITGB8;FAM101A
SHANK3	7	KALRN;MCF2L;PDE2A;KANK3;ABLIM3;KIAA1217;CDH5
PDE9A	7	MYRIP;CPD;DSC2;CYYR1;HID1;RBM14;PCDH19
VPS13A	7	BTC;KCNH2;PPP2R2C;SHROOM3;SMYD2;RPRD2;UCHL3
NAGA	7	PPT1;C1QC;CCR1;CYBA;AP1B1;FUCA1;FOLR2
PYGL	7	ASPH;PC;MGST1;RBP4;LDHB;GLYAT;THRSP
COL8A2	7	FAM180A;LOXL1;FAP;WISP1;DKK3;ITGA11;FGF14
KRT79	7	PAPSS1;DBI;ALDH4A1;DHRS11;ACSF2;MOGAT1;CITED1
INPP5A	7	RASGRP2;CACNA1H;EFHD1;RBPMS2;CALD1;GPRC5C;CRIP2
BMP1	7	NFATC4;ADAMTSL4;SLC39A14;GLUL;CREB3L1;ANO8;GFPT2
PREX2	7	YPEL5;WNK1;DDR1;APBB2;C1QTNF1;LMCD1;SLC29A2
PPARG	7	CYP4F22;ADIPOR2;KLF15;CYB5A;NRIP1;LPL;PRR16
HRSP12	7	TRAF1;PFKFB1;DCXR;GPT;PXMP2;ABCD2;S100B
SLC43A3	7	RAB3IL1;CTSK;NAV2;SPOCK1;B4GALT1;GDF15;ZNF438
RABAC1	7	B3GALT4;C1orf122;MFGE8;CALU;ITGAV;PTPRM;CRIP2
LDOC1	7	CSDC2;ITGA8;TGM2;CASQ2;RAMP1;GATA6;REEP1
GLI3	7	ADD3;KLHL31;PALLD;CAP2;AKAP9;APPL2;HAPLN2
MARCH3	7	BCL2L1;DAGLA;LMNB1;SLC39A14;CCDC71L;TNFAIP6;IFI16
MYOZ1	7	AKAP6;AMIGO2;ACTC1;RAMP1;TNNI2;ITIH3;SORBS2
NPC2	7	TYROBP;IGSF6;HEXB;CTSD;IFI30;SLC15A3;SNX21
SLC25A30	7	MYRIP;LRRC8C;ADAMTS9;LRCH1;STARD3;GIPC2;GLTPD1
RAPGEF3	7	ADCY4;LNX1;TACC1;MKL2;HID1;LIFR;ANKRD29
MAML3	7	TCF4;ENG;HOXB7;MCM5;KIF17;DACH1;CDH5
CTIF	7	DGAT1;FAM166B;MAN2A2;C19orf80;DMPK;ACAD11;NOL3
NUMBL	7	BAG3;HDAC7;CLEC3B;CSF1;SMAD3;TTC7A;SNX21
AMOTL2	7	AOX1;NPR3;HDAC7;SVEP1;CSF1;NR2F2;LATS2
ZBTB40	7	H1F0;IGSF8;SLC16A14;ZNF692;ZSCAN18;GATSL3;BRD8
ENOSF1	7	TGFB1;GAS2L1;CCS;APBB3;ZMAT1;GLTPD1;TUBE1
UBE2T	7	TPX2;E2F1;BUB1B;CEP55;FOXM1;TK1;MYBL2
GAS2L3	7	PMP2;SFRP5;DRP2;ITGB8;NRXN3;FOXD3;CADM4
ZNF436	7	BCL2L1;LMNB1;ACVR1B;B4GALT5;RUNX1;DACT1;ASAP3
CMKLR1	7	DOK2;IRF5;C1QC;SELPLG;CYBB;LGI2;GAS7
IL33	7	ECSCR;CFI;CPXM2;RAMP3;GNA14;SPNS2;DARC
FILIP1	7	FILIP1L;ENPP2;PALLD;NEXN;BMX;HPD;IGFBP7
ZNF792	7	FAM213B;HOXB3;HOXB7;EFNA1;ERG;GIMAP6;GIMAP7
SPAG5	7	MKI67;TPX2;NUSAP1;CDCA3;FOXM1;PTTG1;KIF2C
NHSL2	7	HEG1;SMCR8;MGAT2;NR2C1;PTPRB;CLK1;THOC1
MAP1LC3A	7	C1orf122;SOD3;TMEM259;NME3;MAZ;CCDC85B;H2AFJ
GALNT13	7	SEMA3C;CD70;PIEZO2;ECM1;PCOLCE2;ITGA11;ABI3BP
DACT1	7	RUNX1;PLAU;IFI16;ZNF436;NGFR;B4GALT5;BCL3
SPTBN1	7	MAP1B;LTBP4;CFD;LMX1A;SMAD3;MBNL3;GSN
BRSK2	7	PRDM16;LGR6;SFRP5;AATK;MPZ;MAL;CARNS1
TUSC3	7	DOCK9;NOTCH4;MAGED2;TSPAN13;MYO1B;COL4A1;CDH5
AGPAT4	7	SDS;IL12RB2;STX4;MICAL1;MYO9B;SLAMF9;LIMD2
B4GALNT3	7	RAP1GAP;BAMBI;FA2H;FBXO2;CLDN1;SOX8;BCAS1
OSER1	7	CCDC107;RLF;C15orf38;IFRD1;TRIM44;FEM1C;P2RX6
SLC1A4	7	DNASE2B;ASPHD1;ALCAM;PLA2G7;GPC4;CD300LB;MATK
PTPRO	7	SPI1;TFEC;CCR1;CCDC88A;FERMT3;TNFRSF11A;LCP1
TTYH3	7	PLD3;TYROBP;MPP1;GRN;FCGRT;PIK3AP1;MSR1
DMRT2	7	BCL2L1;TM7SF2;CCND1;CEPT1;EPS8;CRLS1;RASAL2
VPS13C	7	ZNF629;ETNK1;RAPGEF2;JMJD1C;CLK1;THOC1;RPRD2
SLC2A4RG	7	XPO1;PREPL;GLIS1;STARD9;PPDPF;GPT;ODC1
C12orf23	7	RCN3;MAGED1;CALU;SEC61A1;KDELR3;CHPF;PDE8A
STK40	7	ANXA1;PTPRN2;GALNT12;APP;RNPEPL1;MAP2K3;ACY1
ELOVL1	7	LOXL2;INPP5K;ESYT1;MYL6;RHOBTB3;GYPC;CD248
HOXD1	7	FZD6;LRRC8C;MECOM;MYCT1;TMTC2;CBX2;TSPAN7
C1orf228	7	TFEC;ALCAM;APOBR;FGR;TFRC;TREM2;MATK
COL15A1	7	EHD4;CFI;ELTD1;VWA1;KIF17;TM4SF18;FAM13C
LCAT	7	CREB3L2;FAM160A2;FAM167B;RUSC2;IFI16;DLGAP4;DUSP23
NR2F6	7	EVA1B;ZNF865;ANKRD9;MFSD3;TMEM160;FBXL15;CCDC85B
MACF1	7	PARD3B;VCL;CALU;ILK;C9orf3;DMPK;MBNL1
COX7A1	7	CCDC107;SNCG;NDUFB7;SLC24A3;EGFL6;TTC36;UCHL1
SDC2	7	LBP;CHML;ASPHD1;SDS;CD300LB;SPOCD1;TRPM2
SCRN2	7	PPP1R1B;TMEM139;PDE3B;PEX19;PNPLA2;TMEM132C;PLIN1
S100B	7	GPT2;HRSP12;RBP4;PFKFB1;LPL;GPD1;GLYAT
NPY5R	7	TRDN;CCDC3;TLE2;PRKAG2;EGFL6;PCLO;MAP6
ST3GAL5	7	LONRF3;RASL11A;CCDC102B;CCNG2;PRR16;ARRDC2;VASN
CCS	7	INTS3;PGAP2;EFEMP2;APBB3;SCNN1D;CAPN3;ENOSF1
LPCAT4	7	TLL1;CFI;PDIA5;CYYR1;TMTC2;C10orf128;LIFR
SLC39A11	7	HSPB7;TIMP3;CCDC107;RASSF4;LRCH1;GRN;MBNL1
HSD17B8	7	PCYOX1L;MAGEF1;ZMAT1;TRAPPC6A;PINK1;ODC1;TMEM42
CXCL11	6	IDO1;STAT1;CXCL9;WARS;UBD;CXCL10
HLA-DMA	6	CD74;HLA-DPB1;HLA-DRA;PSMB9;HLA-DPA1;HLA-DMB
EGR1	6	FOS;EGR2;EGR3;FOSB;MCL1;ATF3
IGJ	6	MZB1;CD27;LY9;FAM46C;DERL3;CD79A
REG1A	6	SYCN;CPA2;CLPS;CPA1;PNLIP;PLA2G1B
HOXC11	6	KCNH2;NCS1;HOXC10;HOXC13;HOXC12;HSD17B6
SAMD9	6	SAMD9L;PGAP2;IFIH1;OAS1;RTP4;OAS2
UBD	6	IDO1;PSMB10;CXCL9;TNFAIP3;CXCL11;CXCL10
GIMAP8	6	TGFBR2;MFNG;RELL1;MKL2;GIMAP4;GIMAP7
AARS	6	IARS;ALDH1L2;YARS;MARS;ATF5;GARS
PCDH12	6	LOXHD1;APLNR;HSPA12B;TNFRSF4;BCL6B;N4BP3
SEMA3F	6	RASIP1;EPHB4;LHX6;HYAL2;ADAM15;ATG9B
NDRG4	6	GINS3;RAI2;TTC36;C10orf90;SLC27A2;GREB1L
SEC61A1	6	P4HB;PYCR1;C12orf23;SURF4;CKAP4;C19orf10
CAT	6	LIPE;EPB41L4B;FABP4;C7orf41;HSDL2;CIDEA
SMAD6	6	SOX18;ENG;SMAD7;ID1;ELFN1;HEY1
CMTM8	6	ENG;S1PR1;TSPAN13;CLEC14A;CDH5;HEY1
LDHB	6	GPAM;ASPH;PC;MGST1;GYS2;PYGL
UQCRQ	6	DBI;ROMO1;NDUFB7;PSMD14;IFI27L1;ATP5E
NGF	6	HEYL;TOB1;NR4A3;SSTR2;FOXF1;HEY2
BCORL1	6	AHDC1;SLC35B2;SMARCD2;SUFU;BCL9L;PHF23
PDE5A	6	KCNAB1;PDE3A;PPP1R12A;FHL5;SORBS2;PARM1
DPYSL3	6	C14orf80;TNFAIP6;MAMDC2;THBS3;SYNE1;PTGFRN
CCL2	6	RGS16;UGCG;PIM1;CCL8;CSF3;ICAM1
CAPN2	6	ANXA5;SH3BGRL3;SNX9;PPL;EMP3;S100A6
EPHA2	6	RARA;SOX18;ZNF692;NOTCH1;NRARP;SH2D3C
RPLP2	6	SHFM1;RPL28;OMD;RPS21;HEBP2;ATP5E
ISM1	6	LAMA2;LTBP2;MGP;C1S;FIBIN;FBLN5
SRF	6	WDR1;DNAJB5;CFL2;CSRP1;PRR26;ZYX
PREPL	6	ZMAT1;ZRANB2;FUBP1;SLC2A4RG;ODC1;TMEM42
RNASET2	6	RNASE6;TYROBP;C1QB;C1QA;CD86;MERTK
RELB	6	CSF2RB;UGCG;SAMD10;NFKBIE;ICAM1;NFKB2
ABCG1	6	MLLT4;CETP;CDC42EP3;MECOM;SREBF1;MYLIP
CERKL	6	TBC1D10C;ITGA4;ZAP70;CD8A;IKZF1;CD3E
SSTR2	6	RARA;HEYL;ADAMTS1;NGF;FOXF1;LRRC10B
REG1B	6	SYCN;CPA2;CLPS;CPA1;INS;PLA2G1B
C5orf30	6	NR3C1;DDR1;CISH;IFNGR2;RGS3;PHLDA3
LTV1	6	SREK1;NAA25;FAM208B;PNISR;PAK1IP1;DKC1
DUSP4	6	GPAM;KLHL31;DGAT2;SREBF1;C19orf80;THRSP
B3GNT5	6	EGR3;FABP4;CCRL2;ADRB2;PDK4;RNF122
ARRDC3	6	EGLN3;BHLHE40;LRRC32;IER3;ANKRD37;NDRG1
NID1	6	LAMA2;FSTL1;COL4A2;COL4A1;SMOC2;LAMC1
C10orf90	6	NDRG4;MSC;OSGIN1;ADAM12;UCHL1;FGF1
MAP3K6	6	ZBTB16;TACC1;MTUS1;ITPKC;RPGR;SLCO4A1
SMPD3	6	TRAF1;EPHX2;PGAP2;YJEFN3;RBM14;TTC18
MICAL1	6	DOCK3;TCIRG1;AGPAT4;MYO9B;SPOCD1;HMG20B
TRIM21	6	IFIH1;PARP9;PARP12;EPSTI1;BATF2;IFIT2
OSR2	6	TRNP1;STIM1;TRERF1;KCNS2;SMOC2;F10
ATXN7	6	CHD6;MED13L;ATF7IP;ZZEF1;TNRC6C;BAZ2A
IL17RE	6	KCNQ3;GPC1;DLGAP4;FADS3;IL17RC;S100A16
AGPAT9	6	AMN;GLIS1;TTC36;PTPN3;KIAA1239;SLC27A2
A2M	6	ELTD1;SPARCL1;NOTCH3;IGFBP2;ESAM;CYYR1
ESRP2	6	RAB25;RHOV;CCDC64B;ESRP1;MAP7;SERPINB5
RBM47	6	CCR1;TYROBP;C3AR1;FERMT3;HCK;PIK3AP1
CMTM2	6	SELL;SORL1;PROK2;CSF3R;MMP25;S100A12
RRP12	6	TCEAL8;PPRC1;NOC3L;ZMAT1;MYBBP1A;NOL6
LBP	6	NPR3;FAM65C;SOS1;SDC2;CHRDL1;EGFL6
SLC12A6	6	CTD-2369P2.12;KPNA1;NR2C2;ZZEF1;RAPGEF2;CREBBP
SERPINF2	6	PCOLCE;FABP4;IGFBP7;ECEL1;C1S;C1R
NPTN	6	DBNDD2;WDR1;MFSD1;EDIL3;DNAJB5;SH3BGRL
BTC	6	SELM;RASSF3;RNF180;PPP1R9A;P2RX1;VPS13A
PLS3	6	MYH9;VCL;PLEKHA7;FAM26E;DACH1;GPR176
ITM2C	6	KCNH2;TMEM35;MCHR1;SMTN;BCHE;HSD17B6
RASSF5	6	OMD;FMNL1;CILP;FGF18;IGFBP6;HAS1
HSD11B2	6	KRT77;AQP5;KRT23;RHOV;CCDC64B;SPINT1
TSC22D1	6	PELI1;BTG2;PPAP2A;CCRL2;SRGN;APOLD1
TNN	6	SGK223;TFPI2;CBLN1;ABLIM3;CTNNBIP1;SEZ6L2
ADAMTS2	6	MFGE8;CALU;COL5A2;COL5A1;ANPEP;ZEB1
GPX4	6	PPP1R1A;PLA2G16;CALB2;ADIRF;MGST1;VEGFB
TENC1	6	ZBTB16;ACVR1B;ABHD14A;ITPKC;SMARCD2;SLCO4A1
LRRC32	6	EGLN3;SMG6;BHLHE40;SPNS2;ARRDC3;SLCO4A1
RPUSD1	6	INTS3;ZMAT1;HEMK1;ECHDC2;GLTPD1;TMEM42
C1QTNF1	6	EGFLAM;PREX2;ATP10A;DDR1;LMCD1;EDEM2
PGAP2	6	INTS3;CCS;VILL;SMPD3;RBM14;SAMD9
EPHB6	6	PTH1R;C9orf16;PPP1CB;JAK2;PARD3B;ANGPT1
PTCH2	6	NTNG1;TSPAN11;CAPN6;GLI1;GFRA3;PAK3
LZTS1	6	NCK2;LINGO1;PEAR1;NOTCH3;NGFR;NDUFA4L2
GLYCTK	6	APMAP;DNAH1;TM7SF2;ALDH1L1;MBNL1;PMM1
MRGPRF	6	DBNDD2;VASN;LMOD1;MUSTN1;ST5;HEY2
CBFA2T3	6	HYAL2;ITGA6;HSPA12B;SLC9A3R2;KAT6A;ZNF467
TLE2	6	FMO3;NPR3;NPY5R;THAP8;TLE6;EGFL6
TFPI2	6	CDH13;NPDC1;ISOC1;GNG11;PKP1;TNN
STMN2	6	RUNX2;EDA2R;CPXM1;DPYS;MCOLN3;DPEP1
TENM1	6	DCN;GPR133;DCLK1;RASSF4;PARD3B;MMP27
NDST2	6	C9orf16;RGS13;CPA3;KIT;HDC;SIGLEC6
PIM3	6	SERTAD3;IRF2BPL;TIFA;ICAM1;HES1;BCL3
ASAH1	6	C20orf24;CTSD;RHOXF1;EGFL6;C19orf24;STS
ADAMTS5	6	SEMA3C;ADD3;UAP1;PAMR1;FBN1;ABL1
FIBIN	6	ZBTB16;ISM1;SVEP1;USP53;TLDC2;FBLN5
NPY2R	6	SLITRK4;CFD;AFF2;MBNL3;KCNIP3;CXCL14
NFIC	6	PHF15;ATF7IP;POLR2A;SF3A1;BCL9L;SMARCD2
CUL7	6	CD53;IRF5;C20orf24;MAGED1;MSH2;RHOXF1
ANKRD9	6	NR2F6;TMEM160;FBXL15;FAM229A;PDF;CITED4
CHST15	6	NEURL1B;MFNG;LINGO1;PEAR1;NOTCH1;NR2F2
PRKAB2	6	SIAH2;ZBTB7C;VCL;TPM2;FHL3;FADS3
GALK1	6	GPR146;NRSN2;CPLX1;TMEM204;NDUFA4L2;SEMA4B
PAQR4	6	GAS2L1;SLC45A1;SPARCL1;KIF17;ARHGDIB;CDH5
KIAA1199	6	ABHD17C;SCG5;PTX3;SCG2;GREM1;GRIA1
OSGIN1	6	SQSTM1;UCHL1;C10orf90;SRXN1;MSC;TXNRD1
GDF10	6	SERPINA5;RASSF4;ITM2A;MGP;FBLN2;SCN4B
RHOBTB2	6	PPM1F;WASF3;MTSS1L;EXTL3;CST3;GSN
APLN	6	PPP1R3G;PLOD1;ADRA2B;ENO2;ALDOA;ZNF395
FAM78A	6	PLCB2;SASH3;ARHGAP30;SNX20;IKZF1;GPSM3
IGF2	6	RPS6KA2;PLOD1;TNNT3;IGFBP2;SPARC;SMOC2
NRG2	6	NR3C2;LNX1;DSC2;GNAZ;BST2;CCDC85A
DEK	6	NEK7;FCHO2;TCIRG1;POLD1;FAM229A;ENTHD2
ABAT	6	SPHK2;SUN2;PCYT2;BCAT2;IZUMO4;GCDH
TMEM88	6	AIF1L;NPDC1;PREX1;CCM2L;ZNF692;CYYR1
CLCA2	6	GJB6;CCDC64B;ESRP1;ZNF750;SERPINB5;S100A14
TRERF1	6	NCOA3;OSR2;RUNX1T1;ANPEP;CD248;EBF2
FAM109B	6	DCHS1;ST3GAL2;FGD1;MAGEH1;CHPF2;NYNRIN
SYTL2	6	LPHN3;CYFIP2;CSRP1;MYOCD;TEAD3;CALD1
LAMA1	6	CFD;FAP;CXCL14;CD4;SCG5;GEM
IGFBP4	6	NLGN2;ADCY3;NRSN2;CYP19A1;ADM5;NFATC4
WDR43	6	BYSL;RRP9;PPRC1;C10orf2;DKC1;PPAN
PPP1R3G	6	PFKP;APLN;ALDOA;KDM3A;ZNF395;STON2
H2AFJ	6	SCAND1;ROMO1;RRAS;MAP1LC3A;C6orf226;TAGLN
RASL11A	6	FMO3;ST3GAL5;SLC38A2;FHL5;IGFBP7;PHC2
IRF4	6	MAP1A;PPP1CB;ADAMTSL4;THBS2;GALNT12;DPP4
TEX2	6	ALDH4A1;CCND1;ROCK2;CDKN1C;ETNK2;PIK3R1
HEATR1	6	SREK1;TRMT13;GANC;TMEM47;PAXBP1;BTAF1
ITGA6	6	PRKCH;ITGB4;CBFA2T3;MFSD6;HSPA12B;MYO5C
PCDH20	6	SLC20A2;P2RX1;MYOCD;TRPC4;REEP1;HSD17B6
COLEC12	6	LYVE1;CSF1R;KCNQ1;CD200R1;TGFBI;FOLR2
UST	6	IL17D;LRP4;SLIT2;WNT9A;GAS1;ARHGEF26
CADPS2	6	TEK;CYYR1;TRMT13;ARL15;PTPRB;PRCP
CBX2	6	FAM213B;PCDH1;CARD10;HOXB7;HOXD1;NOTCH1
FCHSD2	6	LINGO1;NCK2;FAM168A;CYYR1;ADAMTSL4;CCDC85A
ZNF691	6	ARHGEF12;TRMT13;JRKL;PEX19;STX10;KLHL9
PCCB	6	PDHA1;DLD;ECHS1;LDHD;DECR1;ACADM
WISP2	6	PTPRS;CILP;REV3L;SMOC2;MXRA8;CTHRC1
CDYL2	6	LRRC8A;PALLD;IGFBP2;FHL3;CTGF;NEXN
C17orf59	6	LYL1;PNISR;ARMC7;DUSP7;CBX4;GLTPD1
BZW2	6	NHLRC3;MINA;CRLS1;GART;PLAGL1;ABHD5
KCTD3	6	SLC38A2;TLDC2;MKL1;HIPK3;TBX15;RNF146
TP53I13	6	LAMA4;RAC3;FAM47E-STBD1;PNPLA2;LRFN4;COX14
PFKFB3	6	LIPE;ORMDL3;GPT2;CEPT1;IRS2;TM7SF2
SGSM3	6	ULK1;PNISR;MIB2;NRROS;LUC7L;ZFC3H1
CITED1	6	DCN;KRT79;CYP4B1;RGS5;MOGAT1;GSN
LMX1A	6	FBN1;TPPP3;DBN1;MMP27;SPTBN1;DACT2
USP53	6	LTBP2;CUTC;TLDC2;FBLN5;FIBIN;KLF9
PLXNB3	6	LAMA4;FNDC4;TSPAN15;FABP4;ABHD5;CIDEA
SPTAN1	6	PLCB3;DENND2D;TTC7A;ATP8B4;ITPR3;LMNA
MFSD3	6	ABCA7;NR2F6;RAB2A;FBXL15;GPT;KIFC2
TNFRSF11A	6	NCEH1;SPI1;ALCAM;APOBR;PTPRO;LCP1
NAV1	6	EFNB1;PNRC1;CCDC71L;KIF7;RARRES2;ZNF697
NFATC4	6	NLGN2;BMP1;FKBP10;REV3L;GNA13;IGFBP4
PAN2	6	NCK2;CCDC93;HPS6;NEURL4;DENND4B;BTAF1
BRPF3	6	EGFLAM;DAAM1;DDR1;MAOA;GBE1;MAPK13
ST5	6	MYH11;RAB33A;MRGPRF;MARVELD1;FLNA;LMOD1
STIM1	6	OSR2;FSTL1;DENND3;CNTN3;ANPEP;ARHGAP6
GNA14	6	PLSCR1;RAMP3;IL33;DARC;ADM5;TCTEX1D1
RUNX1T1	6	TRERF1;MED13L;ZFHX4;TEX30;CSF1;EBF3
AKAP2	6	TBC1D9;EFNB1;EXT1;GNG12;TRAM1;GNAZ
PPAN	6	WDR4;RRP9;CALU;APBB1;WDR43;MGAT4B
CLIP2	6	VAT1;FAM102A;FMNL3;MAZ;IGFBP7;CXCL14
PLB1	6	CD163;AIF1;GNA15;F13A1;WAS;ALOX5
PHF15	6	NFIC;ATP13A3;SOX13;PRR12;FBXO31;BCL9L
SAMD3	6	IL2RB;GZMA;GZMM;GZMK;ZAP70;CD2
LRRC16A	6	EIF4G1;SLC29A2;PARD3B;MBNL1;HSD17B4;C6
S100A2	6	FXYD3;GJB6;SFN;PKP3;LAD1;S100A14
HAPLN3	6	CSF2RB;TMEM255B;PSMB8;DARC;ADM5;GPR68
ACAD11	6	RBM5;PNISR;ZNF692;ROBO4;CTIF;LSMEM1
HOXA9	6	SESN1;ARID5B;AKAP13;NAB2;KLF9;BMP2
PHLDB1	6	LOXL2;ARHGEF6;CDC42EP2;MMP19;LMNA;CD248
ZNF521	6	CD34;ERG;SH3BP4;PCDHGC3;EBF3;FAT4
ZNF248	6	PNISR;ZNF692;ARHGAP31;ARGLU1;ZFC3H1;LUC7L3
B3GALT4	6	CLUH;GAS2L1;ZDHHC12;RABAC1;BRD8;MBNL1
MMP19	6	SDS;PLA2G7;TFRC;CD300LB;PHLDB1;SPOCD1
PAPSS1	6	ANG;DNAH9;GLIS1;KRT79;MOGAT1;KIAA0922
ZNF574	6	FAM124B;ZNF629;ARGLU1;RPRD2;ZFC3H1;KLHL9
C10orf2	6	BYSL;WDR43;CALM1;POLR1B;DAPK3;STK38L
TRAF1	6	DMPK;CKB;HRSP12;SMPD3;ARMC12;NOL3
NNAT	6	MDFI;ARHGEF6;CALB2;HEBP2;KIAA0922;LAMB3
SPSB1	6	KAZN;RALGDS;NFKBIA;PIK3R1;EMP1;FBLN2
TTLL4	6	SPARCL1;CLEC14A;ARHGDIB;GIPC2;PAXBP1;THOC1
PJA1	6	ANKRD53;PDE1B;CRLS1;SCN4B;PHLDA3;ABHD5
ANKRD13B	6	FAM180A;MRC2;MTMR11;ACAP3;COL6A3;GPSM1
DAGLA	6	RERE;SGK223;FAM168A;TMEM165;MARCH3;TMEM2
ISOC2	6	C9orf16;C20orf24;NDUFB7;TEX261;MRPS12;ODC1
KAZN	6	NPR3;GNAZ;CA4;HSPA12A;SPSB1;SMAD3
TAGAP	6	PMAIP1;LY9;FAM46C;PTPRC;CD2;CD3E
PENK	6	SFRP4;CLEC3B;WNT2;FBN1;C1QTNF3;FSTL1
PHC2	6	SMAP2;RASL11A;SH3TC1;CD93;IGFBP2;ITPKC
BRD8	6	B3GALT4;ZBTB40;GIGYF1;NME3;CDC42EP1;IRF2BP2
RAB33A	6	ASB2;FAXC;KCNH2;MCHR1;ST5;CENPW
ITGB1BP2	6	FAXC;KCNH2;NCS1;SMTN;REEP1;HSD17B6
CLUH	6	B3GALT4;FAM198B;PPP1CB;DDHD1;MOGAT1;LAMB2
NAA25	6	LTV1;ZRANB2;SLC4A7;ATG9A;THOC1;PAXBP1
RAB8B	6	RANBP3L;CCDC107;SLC38A2;ZNF219;ARHGAP6;MAN1A1
TIPARP	6	PPP1CB;SLC38A2;ECM2;FAM46A;ARRDC2;PCDH18
ARMC7	6	IRF2;LYL1;C2CD2L;C17orf59;SLC25A27;PPWD1
CBL	6	RASSF3;ARHGEF2;PNMA1;VASP;PPP1R9B;NAB2
PPP2R2B	6	IL17B;BMPR1B;CNTN4;P2RX1;GABRA4;ITIH3
ACVR1B	6	SBNO2;ELL;TENC1;ITPKC;ZNF436;CLTCL1
KCNMA1	6	SLC38A1;NCS1;REEP1;MAPK4;P2RX1;PDE4D
IRAK3	6	SMAP2;LONRF1;SH3TC1;ITPKC;SLC29A3;SLA
AMOTL1	6	EXTL3;CUTC;UNC119B;SDC3;PPP1R16B;SLCO4A1
SMARCA1	6	SLC2A9;CALCOCO1;NRSN2;SLC35B2;PSMD14;ZNF512B
ANGPT4	6	PCDH9;MAP1B;RANBP3L;TIMP3;SEMA3G;NDRG2
EDA2R	6	ARHGAP30;MAP4K4;STMN2;VAMP8;RUNX2;CYP2S1
FGF18	6	RASSF5;PDGFRL;CILP;IGFBP6;WNT9A;HAS1
ERF	6	SERTAD3;AVPR2;ZNF692;TMEM204;FAM110D;DUSP7
LAMA4	6	PLXNB3;FNDC4;TP53I13;SECTM1;PIK3R1;MGAT4B
LRP4	6	FAM19A5;UST;EMP3;WNT9A;GAS1;FGF16
PDE8A	6	FYB;LYL1;PGRMC1;IFNGR2;ARFGAP1;C12orf23
KRT13	5	RHCG;LIPF;PGC;CRNN;KRT4
KRT4	5	RHCG;CRNN;KRT13;PGC;LIPF
KRTDAP	5	KRT2;KRT1;LY6D;CALML5;KRT10
MZB1	5	CD27;DERL3;PIM2;IGJ;CD79A
CD79A	5	MZB1;MS4A1;CD27;IGJ;LY9
KRT2	5	KRT1;MYL2;CALML5;KRTDAP;KRT10
PDIA6	5	PDIA4;SDF2L1;HYOU1;FKBP2;C19orf10
DBP	5	PER3;HLF;NR1D2;TEF;SRPX2
PDGFD	5	SMOC2;GRIA1;PTX3;SVEP1;BICC1
KRT10	5	KRT2;KRT1;LY6D;CALML5;KRTDAP
CXCL9	5	UBD;CD5;IDO1;CXCL11;CXCL10
ZNF358	5	C9orf16;BAD;ZNF219;EVA1B;MBD3
HRASLS5	5	CDKN2B;LGALS12;MAOA;GPD1;PLA2G16
SDF2L1	5	PDIA6;PDIA4;CCDC85B;MANF;HYOU1
MMRN1	5	CCL21;GPM6A;PROX1;PKHD1L1;TFF3
STAB2	5	PROX1;DAB1;NTS;PKHD1L1;TFF3
STS	5	KDM6A;EGFL6;HDHD1;ASAH1;GREB1L
BIRC3	5	TNIP1;NFKBIA;SLCO4A1;TNFAIP3;ICAM1
LY6D	5	KRTDAP;KRT1;S100A14;KRT5;KRT10
EGFR	5	CORO2B;DCLK1;CELF2;ECM1;STXBP6
CALB2	5	PPP1R1A;PPP1R1B;MYH14;GPX4;NNAT
KBTBD11	5	TBX1;GPM6A;PROX1;PKHD1L1;TFF3
CD36	5	SPOCD1;FABP4;CTSD;ST14;GNAZ
[truncated: 1,924 more rows]

## Sheet: Adipose − Subcutaneous (TE-IR)
TMEM160	43	ACADVL;RASIP1;NUDT16L1;RBPMS2;POLR3E;TRIM47;BBC3;SLC25A39;GSN;SDF4;ELAC2;EML3;LIMCH1;CACNA1C;CDK16;ANKRD9;SLC9A3R1;IRF2BP2;PNPLA2;UBE2G1;SIPA1;FBXL19;CST3;MXRA8;ATOH8;LTBP4;TMUB1;C20orf24;RTN4;ZNF580;PPP1R35;PVR;ST6GALNAC6;DUT;SLC27A3;MIDN;C5orf38;RGS11;ZNF174;TFG;PALLD;SDHB;CFD
ARGLU1	36	FAM160A2;NPDC1;ADNP;HDAC9;MED23;GAB1;LAMB1;CCNG2;MARCH6;NOSTRIN;TXNIP;CREBZF;DDX17;SRSF1;UBTF;TMCC1;NARS;ETS1;PNPLA7;PXN;HSD17B4;UBXN1;ERN1;SCAMP2;CEP63;CD47;NR2C1;TNKS1BP1;PCNX;MCM9;VPRBP;RNASEH2C;PCDH1;CSTF3;RBM26;RNF146
ZRANB2	35	CNST;NPDC1;CBLB;RNPEP;DYRK2;MED7;HNRNPH3;TXNIP;CPSF6;DDX17;SRSF7;SRSF1;TMCC1;ZC3H14;ACVR2A;ARIH1;WNK1;UBE2E1;SLC39A10;ZNF84;TEX261;TP53BP1;MMP28;PCNX;MCM9;VAMP1;PTPRS;EPC2;RBM26;HSPB11;MARCH6;CYLD;WDR33;MYBBP1A;ZBTB21
FOXRED1	28	PHF15;TMEM259;CD2BP2;CDKN1C;MYO1E;ACADM;HNRNPLL;CYP26B1;MAPK3;NIPBL;GBE1;FOSL2;DIAPH1;ARL6IP6;ELTD1;C7orf41;TPR;MARC1;OXA1L;PEX1;ADCY5;KCTD15;HSPA14;ADARB1;ITM2A;ZBTB47;PSMB4;CFL2
RBM14	27	IFT27;WDR86;HNRNPH3;TPK1;PTGER3;ADAMTS2;TLN2;SEPHS2;THRA;COL27A1;CLINT1;ARIH1;CD44;BCCIP;BICD2;MCM9;PEX5;RNASEH2B;TBC1D16;MRPS25;EPC2;PLCD4;ADARB1;GTF3A;NXPH3;CLK4;ITGAE
CEBPA	26	ACADVL;RASIP1;RILP;ZNF691;WRNIP1;MXRA8;MESP1;PROSER2;MRPS34;IRF2BP2;FAM129B;CST3;TPRA1;ULK2;LTBP4;FOSL2;SSSCA1;IGFBP3;TRIM47;LMNA;RGS11;FAM150B;C7orf43;EML3;AGTR1;SEC61A1
KLHL9	25	FAM160A2;ANKRD13B;ADNP;KIAA1462;SMAP1;SRSF1;RAB30;PLOD3;UBTF;PXN;DDB2;DPM2;DDX17;CD47;TSC22D2;ALS2;TMEM100;ZNF800;MCM9;VPRBP;C9orf72;KIF13A;RNF103;UNC119;RNF146
RNF122	24	CD7;AKAP12;SPIDR;N4BP1;MPZL2;GLDN;SLC22A23;ADAMTS9;IVNS1ABP;UCK2;DDX17;NR4A2;CREB5;UAP1;HID1;BCCIP;SEC24C;SLC25A25;ITPR1;UPP1;DAPK3;NOSTRIN;BRE;ZBTB21
PNISR	24	NPDC1;HDAC9;RPGR;KIAA1462;LAMB1;STRA13;TXNIP;ENTHD2;FZD6;DGAT1;PALMD;ETS1;PXN;MPDZ;ACAP3;SMTN;NR2C1;POLR2H;PTPRS;PCDH1;ARMCX4;TTC37;CLK1;PSMB4
ZNF691	23	TEX10;HIPK3;MFSD10;DHX15;GYG2;IFT140;PLOD2;PLOD3;RB1;ICAM2;TUT1;SETX;EPB41L2;FBXO42;MTR;COG1;RXRA;SEC24C;VPRBP;SLC3A2;SLC12A9;CSTF3;PSMB4
SRSF11	22	RECK;LMF1;KTN1;MYH11;HDAC9;LGI4;ATP5E;UBTF;OXA1L;PXN;SCAMP2;GBP2;COG1;ACOT8;POLR2H;PSMB4;SH3BGRL3;RBM26;ITM2A;TTC37;KIAA1217;HIRIP3
UNC119B	22	PCED1A;ARRDC2;SLC7A8;STAMBP;CHN1;TXNIP;MXD4;GNAI1;MPZL2;UNC119;TRO;TRIM25;UCK2;RCL1;AGAP1;PNKD;KIAA0040;POGK;CTDSPL2;COL5A1;C5orf58;CLK1
CCDC85B	22	HOXC9;RASIP1;TMEM259;RILP;C9orf3;RAB34;SLC9A3R1;SLC27A3;SEPHS2;PPP1R9B;MTA2;DPP7;ACSS2;PPP1R35;MXRA8;SLC39A3;SLC43A1;FGFR1;SRPX;SLC1A5;PRKD2;PHF1
MASP2	21	VAMP1;CD2BP2;AGBL5;SRSF1;LGALS12;SMAD4;PCDH1;CD47;CALM1;PHF21A;AKAP8L;RBM26;DDX17;TEX261;WDR33;CLK1;ARGLU1;PCNX;DAPK3;MCM9;VPRBP
ZFC3H1	19	SLC35F5;DDX17;ARMCX4;SRSF1;ADAMTS2;HDAC9;WNK1;ZNF84;RBM26;TTC32;TEX261;PXN;WDR33;DDX5;GABRE;CPSF6;MTERFD3;MCM9;VPRBP
PPRC1	19	SBNO2;ZNF511;TEX10;IFRD2;SLC44A1;USP2;XPR1;CTSF;THRA;DDX17;TYMP;YARS;SLC5A6;SLC25A25;DDX5;FBLN2;PMM1;HAS1;CGGBP1
TRAPPC5	19	C19orf66;MIDN;SDF4;RAB11FIP5;PNPLA2;RTN4;ANKRD9;TFG;RXRA;KIFC3;RDH14;IGFBP3;PALLD;CST3;ZNF579;B4GALT2;CST7;SLC27A3;MTA3
SLC7A6	18	CNIH3;SLC35A2;TRO;FXYD1;YBX2;PSAP;TEX10;C7orf55-LUC7L2;RAI2;TTC32;COL27A1;KRT5;CENPV;STK39;C7orf49;PLCD4;MID1IP1;FBXW7
ZNF444	18	RBPMS2;ACADVL;TMUB1;CUEDC1;RASIP1;PNPLA2;EML3;SIPA1;MESP1;GTF3A;IGFBP3;LTBP4;CST3;ST6GALNAC6;AGTR1;ATOH8;ZNF800;SEMA6A
TTC36	17	ULK2;MDK;MED16;RILP;PC;ACSF2;DGAT2;CRYAB;C7orf43;WDR86;C7orf41;RER1;ANKS6;SMOC1;SLC35C1;TBC1D16;ABCC3
SDHAF1	17	PPM1G;NFIC;ACADVL;TMUB1;RAB11FIP5;C7orf43;EML3;CFD;CDK16;JUND;GTF3A;IGFBP3;CMTM3;MXRA8;RASIP1;TPRA1;PRKD2
PGAP2	17	PEX5;DGAT1;CD44;PPT2-EGFL8;SH3GLB1;ADARB1;PEX19;PNPLA2;PLCD4;CDC42BPA;CLINT1;TCF25;PHLDB2;VPS13B;MARC1;ATP2B4;TYW3
C19orf68	16	ZBTB1;ARMCX4;MEPCE;HEXB;MRPS34;SNX8;TCEA2;RBPMS;ADARB1;GTF3A;PNPLA2;FOXRED1;GRASP;BSCL2;HNRNPLL;ATOH8
SLC2A4RG	16	C7orf49;TBC1D16;ARIH1;TRO;FXYD1;CDKN1C;MAPKAPK3;CCND3;ASPH;ADARB1;FAM69B;RER1;PINK1;HEMK1;GPATCH2;ITGAE
C5orf54	16	HECTD2;SLC39A10;ICAM2;RB1;DGAT1;CCND3;CLMN;RXRA;STIM2;CALML4;HIPK3;FAM69B;MED7;TBC1D16;ASAP2;C10orf137
FOSL2	16	HSF1;NEDD9;RASGRF2;NR4A3;PPM1M;PRKAG2;ADAMTS9;SIDT2;RAI2;CD7;WDR33;CENPV;BRE;DAPK3;TSC22D3;SLC35C1
FUBP1	16	SLC35F5;VAMP1;SRSF7;ARIH1;ADAMTS2;PCDH1;WDR86;RBM26;DDX17;BCCIP;FAM20A;USP15;CPSF6;ZBTB21;MTERFD3;VPRBP
CBX6	16	IL17D;UCK2;MPZL2;ZBTB16;SLC7A8;ARHGEF40;ADORA1;TRIM25;PKIG;AGAP1;PCED1A;ARRDC2;ARHGAP24;CLK1;MXD4;GNAI1
S100A4	16	MDK;FZD6;CLDN15;MTR;SPTAN1;ADCY5;UBTF;COL14A1;SCRIB;PARP16;WDR86;RUSC1;RER1;TIAL1;SMOC1;PEX19
ANKRD9	16	SNAPC2;RAB11FIP5;ARHGEF40;PKN1;MRPS34;TFG;CDK16;CST3;IGFBP3;PALLD;UBE2G1;DDRGK1;TCF25;DGAT1;DUT;XBP1
QRICH2	16	VAMP1;SLC20A2;UBTF;SNCAIP;TMEM126B;CD2BP2;SH3D19;RPGR;SNX8;KLHL29;ZNF449;BCCIP;ADHFE1;CLINT1;SIX5;CLK4
RNF38	16	ITGAE;EPAS1;EPB41L2;HEG1;ANKRD13A;ITGA1;ACSF2;PSAP;CTSF;THRA;FRYL;SLC35A2;PLCD1;DDAH1;HMG20B;ARHGAP33
FAM229A	16	CD2BP2;SRSF1;RAB30;ACSS2;COG1;KIAA0408;RBM26;SNAPC2;RNPEP;C7orf41;MXRA8;TCF25;SEMA6A;CGGBP1;MTA2;HIRIP3
KHSRP	15	RPTOR;MEPCE;HSPA14;DARS;TMEM80;UBTF;SENP3;SMTN;ADARB1;FOXRED1;RAB30;TGFBI;CDC42EP4;ATP2B4;ARMCX4
FAM166B	15	SDHAF2;KIAA0040;TRO;CALM1;ZNF385A;YBX2;RCL1;KRT5;PLCD4;NTM;ARRDC2;ACAD11;SUV420H1;NOL3;ARHGEF40
SPARC	15	CEP89;PLEKHG6;LST1;DIAPH2;TSC22D3;KIAA0040;DDX5;SMTN;COL1A2;MARK1;VIT;COL1A1;TPRG1;CCND3;PPP1R14A
SNCG	15	LIPE;AP006621.5;CALM1;SELENBP1;CDH23;MRAS;NTRK2;C1QTNF7;RAB30;CABLES1;SMOC1;PLIN1;REEP5;IL17RE;CLSTN3
SPR	15	SIL1;ANXA6;FXYD1;COA6;ASPH;HIPK3;MFSD10;C7orf41;STRA13;CAPN2;HSPA14;PINK1;TMEM165;SMOC1;GABRE
SGK494	15	SRSF7;UBE2Q2;CLDN15;ITGA1;ANKRD13A;PSAP;IL16;THRA;FAM69B;BCCIP;EBF4;RER1;SLC35A2;HEMK1;HSD11B1
HBEGF	14	COASY;PREX2;RASGRF2;GLDN;CDKN1C;NR4A3;COA6;ADAMTS9;LDLRAD2;THEMIS2;MPZL2;N4BP1;NRP2;CLSTN3
CDC42EP2	14	FHOD1;TMEM100;FBXO32;PHF15;MECP2;TBRG4;TESK1;SCPEP1;SREBF1;ABCB6;ABLIM3;MARS;MXD4;FBXW5
RASIP1	14	RARA;DDX17;FAM120B;RASGRF2;NR4A2;SDCBP2;ADAMTS9;EFNA1;EGFL7;RALGAPB;IFRD2;GRASP;ITPR1;TESK1
ASPH	14	GSPT1;ALAD;KIAA0040;CALM1;BID;C1orf213;PEX19;RAB30;ARRDC2;CABLES1;PLEKHG6;MYL6B;FAM219B;CLSTN3
LUC7L3	14	SLC35F5;SRSF1;RNASEH2C;HDAC9;RBM26;TEX261;CPSF6;LAMB1;PCNX;ZBTB21;MTERFD3;LENG8;MCM9;VPRBP
MFSD1	14	CCDC50;RECK;SRSF7;STARD13;TMEM126B;DGAT1;C3orf55;DCLK1;ZNF449;PTGER3;FBXO32;SNED1;CDK16;KLC4
TLDC2	14	UBL7;CCDC39;UNC119;PKIG;INPP4B;SLC2A4RG;UBTF;SMG6;MARK1;ARRDC2;ARHGAP6;GNAI1;FBXW5;FBXW7
CTSO	14	SPIDR;ADAMTS2;PSMF1;INPP5K;DCLK1;PSMB10;DDX17;SREBF1;DDX5;SNED1;FBLN2;ITPR1;PLXDC2;MCM9
ECM2	14	MME;IFT27;CALM1;SELENBP1;PLEKHG5;TCEA3;SCPEP1;TNMD;PRR16;ADHFE1;KIAA0040;COL1A1;PCOLCE;TPRG1
SREK1	14	MYH11;IPO11;FAM50A;DCLK1;USP40;CTSF;PTGER3;ABLIM1;ANGPTL2;FBLN2;TCF25;TMEM8B;POLR2H;PXN
CSK	14	HSF1;ARRDC2;PDLIM2;F8;BID;CLEC2B;DCLK1;MRAS;KPNA1;CENPV;CYTH1;CPSF6;ARHGAP6;FBXW7
EXTL3	14	NFIA;IPO11;PKIG;ITGA6;KIAA0040;AGAP1;PNKD;PKP1;FOSL2;ARHGAP6;CENPV;COL5A1;KPNA1;ZBTB16
NOVA1	13	RECK;CCDC39;IPO11;SPTAN1;CGGBP1;SGCE;PHF21A;CTSF;UCK2;ABI3BP;FBLN2;FBXW5;DPP7
RARA	13	CREBZF;DDX17;IFRD2;DGAT1;RPGR;TEX10;MED26;TYMP;UBE2G1;TUT1;TCF25;ITPR1;TESK1
GIMAP6	13	NPDC1;IPO11;PSAP;IL16;THRA;PODXL;CYTH1;PIH1D1;ZBTB16;DMPK;TXNIP;CMIP;DPYSL3
YJEFN3	13	SLC44A1;SRSF7;TMEM126B;CLDN15;MKNK2;CLDND1;MITD1;ITGAE;BCCIP;CLINT1;HEMK1;PLXDC2;UGP2
CPD	13	EPAS1;PPP1R7;CMIP;F8;ITGA1;AGRN;RAPGEF5;PIK3R3;ABLIM1;DGAT1;MAPKAPK3;ITGAE;CLSTN3
ACSS3	13	CCDC50;SGK2;HDAC9;TLN2;ACSF2;ASPH;RXRA;SMOC1;PARP16;TMEM2;PI16;MKKS;MKNK2
CUTC	13	MED16;TPRG1;ARRDC2;MRAS;RAI2;PCTP;MARK1;KIAA0040;CENPV;ABI3BP;ARHGAP6;CPSF4;GNAI1
NOTCH1	13	PHF15;CD2BP2;DMD;LAS1L;LPHN2;DGAT1;FAM120B;SLC2A4RG;CAPN7;CAPN5;RGS3;ZNF518B;FBXW5
LRP3	13	LOXL1;RILP;DGAT1;MRPS34;DGAT2;C18orf32;PTGER3;ABCA6;GUK1;CXCL12;DUT;SLC27A3;FGFR1
SLC27A2	13	CCDC50;SMAP2;TRAF3;AP006621.5;ARSA;MRAS;RXRA;HN1L;WDR86;KIAA0040;CABLES1;ZFAT;GYG2
ANKRD53	13	HRASLS5;ZFAT;HSPA14;CDKN1C;C1orf213;TLN2;MRAS;RTN4;MKKS;HEMK1;MAPKAPK3;ZNF467;ARHGEF40
PRR24	13	PVR;TMUB1;MRPS34;PFKFB3;RBPMS;IGFBP3;ACAA1;C9orf3;EFCC1;PML;MXRA8;SLC27A3;PALLD
SETD5	13	DDX17;DGAT1;ADAMTS9;LSP1;PSAP;STX4;IP6K2;PNKD;AKAP12;IFRD2;BRE;TESK1;STARD5
TRMT13	13	RARA;CNNM3;PCGF5;IPO11;PPM1A;USP2;PSAP;THRA;FAM69B;PPP6C;SEC24C;CCND3;UGP2
ZNF865	13	ELAC2;PKN1;ACSS2;CGGBP1;IRF2BP2;TGFBI;HLA-DQB1;MRPS34;SLC1A5;VPS51;SEC61A1;MXRA8;ZNF512B
LTV1	13	SLC20A2;PMM1;NPTN;MFGE8;MKNK2;OXA1L;LAMB1;YARS;FKBP2;ARGLU1;PSMB4;ATP5E;CLSTN3
C10orf90	12	ADCY5;SGK2;PEMT;TLN2;C1QTNF7;WDR86;PNPLA7;CABLES1;RER1;SMOC1;TBC1D16;CLSTN3
PPP1R10	12	DDX17;DMXL1;CALM1;ZNF449;MED26;LGI4;DDX5;SEC24C;CLK1;XPR1;CLK4;MCM9
TP53INP1	12	DDX17;CDC16;RASGRF2;PDLIM3;CTSF;SMAD3;HID1;DDX5;IFRD2;DDRGK1;ITPR1;RBM26
ODC1	12	SCRIB;TEX10;CLDN15;MTR;MDK;THRA;SLC2A4RG;PNPLA7;MARK1;DDB2;PPP3CB;ABCC3
GNRH1	12	ACVR2A;DDX17;HDAC9;WHSC1L1;ZNF84;RBM26;TTC32;NDUFAF6;TMEM165;WDR33;DDRGK1;MCM9
FMNL2	12	IL17D;PLEKHG6;PDLIM2;SLC3A2;MED23;TNMD;PCTP;KIAA0040;DENND1A;BID;MALT1;FBXW7
SLC29A2	12	BCAR3;IGF1;ARRDC2;LRRC32;SUPT3H;KIAA0040;MTUS1;HNRNPM;DMPK;PPP1R14A;NOL3;SERPINA5
KIAA0232	12	SBNO2;ADD3;LRRK2;NR3C2;MTR;EPC2;ZNF385A;POR;TBRG4;PLA2G2A;ABCA6;MYBBP1A
ELOVL5	12	PLEKHG6;ARRDC2;ADAMTS2;CDH23;C1QTNF7;PTGER3;KIAA0040;PLCD4;DMPK;PRKCDBP;SUV420H1;NOL3
RPS6KA2	12	RPTOR;TBX3;PLXNA2;VCL;THRA;PODXL;MTUS1;ABLIM1;MBNL1;SCML1;ATP2B4;CAV1
PTMS	12	NEK6;MYH11;PTPRS;SH3BGRL3;SLC3A2;TSC22D2;CYP26B1;MTR;ICAM2;ARGLU1;PLIN1;GYG2
ADCK1	12	EPB41L2;ADD3;CCND3;UBTF;MED23;TEX10;CRTC1;ABCB6;TRIB2;TMEM100;FBXW5;MLPH
MTPN	12	EPAS1;CNST;XPR1;ACSF2;FLI1;PLS3;WHSC1L1;LENG8;SMTN;SCML1;CASD1;ATP2B4
EFHD1	12	PHF15;ACSL1;WWP2;DTX1;LGALS12;DGAT1;RABGAP1;DGAT2;CDK16;DDX47;AEBP1;MYH14
FBXO46	12	USP24;TMEM259;CDC42EP4;OXA1L;SENP3;ADARB1;CYP26B1;ERF;NR2C1;DHX15;TEAD1;TMEM175
NUDT8	12	CRTC1;SNRNP40;PLEKHG6;PDLIM2;ADAMTS2;BID;FAM219B;SLC2A4RG;COL5A1;HNRNPM;ARRDC2;FBXW5
PLOD1	12	SCML1;PDLIM2;MFGE8;USP2;LAMB1;SMTN;SCHIP1;ARRDC2;MOB2;PMM1;CCND3;PPP1R14A
ECHDC2	12	CREBZF;P4HTM;MNT;TCEA2;CTSF;PLCD4;C7orf41;TK2;ANKS6;FBLN2;OSGEPL1;CLSTN3
TSPAN7	12	CHAMP1;ITGB4;DNASE1L1;CCND3;TLN2;RXRA;MTUS1;ABCB6;FAR2;CMIP;SELP;DTX1
CYP4X1	12	CCDC50;MDK;CALM1;BID;INPP4B;SPARC;COL5A1;ARRDC2;CENPV;SMOC1;DDAH1;NOL3
PPP1R16B	11	WSCD1;NFIA;UCK2;IPO11;CLEC2B;PODXL;PML;PCTP;KIAA0040;TUT1;CLK1
POLE4	11	ANXA6;CDKN1C;DNMT1;TLN2;RXRA;TRRAP;STARD9;STRA13;PINK1;TNKS1BP1;ZNF511
DEK	11	FAM160A2;EPB41L2;AES;VWA5A;LSM6;ZBTB1;CSTF3;ITM2A;MED23;DHX15;ACADM
C20orf112	11	RARA;CALM1;FAM120B;RPGR;SLC2A4RG;TM9SF4;ARRDC2;FOSL2;CYTH1;HAPLN3;STARD5
C15orf39	11	DDX17;NT5DC2;SLC22A23;VWA5A;ADAMTS9;CA11;TMEM201;ANKRD37;MAST4;PML;HES4
APOLD1	11	SAT1;ITPR1;RASGRF2;SLC22A23;TNFAIP6;ZNF385D;LPCAT4;AKAP12;ABLIM3;ZBTB21;IVNS1ABP
NOL3	11	PDLIM2;TRO;DIAPH2;ADAMTS2;WNK1;KIAA0040;PLCD4;DMPK;CENPV;BIN1;FBXW7
HEBP2	11	RASIP1;FXYD1;MOGS;RILP;APBB2;IRF2BP2;C7orf43;MMP28;IFI27L2;MXRA8;PPP1R9B
GNAZ	11	IPO11;PC;ACSF2;WNK1;TMCC1;TNMD;KIAA0040;LAMB1;TXNDC5;C14orf180;BCAR3
SELENBP1	11	TMEM88;IFT27;ALAD;PLEKHG5;TSC22D3;PLCD4;PC;AGAP2;PCOLCE;PLEKHG6;NOL3
ARFGAP1	11	PHF15;ACVR1C;DDX17;PSMF1;CLMN;AKAP8L;TMEM201;DDRGK1;SNED1;PATZ1;DDX5
MON2	11	EPAS1;UBTF;KTN1;PPFIA1;SH3D19;TCEA2;MRPS25;PSAP;SIGIRR;TXNIP;MPDZ
FAM214A	11	CAPN7;COL1A1;TBRG4;CALML4;CRTC1;DDX5;MARK1;DDRGK1;IL17RC;FAM219B;GNAI1
SCN4B	11	IL17D;FXYD1;CCND3;PRKAG2;WDR86;MARK1;WDR33;PCOLCE;ABI3BP;MECP2;SGCE
ZNF512	11	VAMP1;HECTD2;SRSF7;EPC2;RBM26;MMP28;MAGI1;CPSF6;MTERFD3;MCM9;VPRBP
ACVR1C	11	DGAT1;DGAT2;RXRA;NTRK2;C7orf41;C12orf39;MED16;MKL2;BCL6;MARC1;PLIN1
PTPRS	11	SPIDR;CALM1;BID;FXYD1;TCEA2;TEX10;CTSF;PTGER3;TUT1;CENPV;EFCAB4A
STARD9	11	RCOR3;ADD3;RECK;CAMK2D;SPTAN1;UBTF;MMP19;ITGA6;SCRIB;PXN;NSD1
EGFL6	11	MFI2;BID;MRAS;C1QTNF7;SELENBP1;SPARC;PET112;CABLES1;SCRN2;IL17RE;CLSTN3
EDA2R	11	DDX17;SRSF1;HDAC9;RBM26;DGAT1;TMEM165;DDRGK1;LAMB1;AEBP1;ADM;VPRBP
CCRL2	11	C19orf66;FAM76B;RASGRF2;GLDN;DGAT1;HDAC9;NR4A2;BRE;ZNF800;MCM9;SLC22A23
P2RX6	11	CALM1;IL15RA;BID;CDH23;MRAS;RXRA;C7orf41;ABCB6;KRT5;PET112;REEP5
B4GALT1	11	RARA;AP2S1;IGF1;PPP1CB;TSC22D3;DCLK1;ARHGEF3;SCPEP1;RAI2;DYRK2;COL1A2
MFSD5	11	CAPN7;UBTF;SGK2;DGAT1;ITGA1;HEXB;SLC2A4RG;SLCO3A1;DDRGK1;TBC1D16;TESK1
JMJD4	11	SLC20A2;ADCY5;MFSD12;TRO;CD2BP2;SH3D19;AKAP8L;C7orf41;PET112;MKNK2;FBXW7
STX10	11	SRSF1;HDAC7;PPM1A;ACD;MTR;COG1;CTSF;THRA;HNRNPM;SEC24C;SLC12A9
PTPN3	11	BCL6;TLN2;MMRN1;ASPH;C1QTNF7;C7orf41;MAGI1;PET112;HEMK1;MAPKAPK3;CLSTN3
GDF10	11	IL17D;UBL7;WDR33;FXYD1;PSMF1;TNMD;WDR86;ARRDC2;ABI3BP;BCL6;B4GALT7
HSPB7	11	BCAR3;MED16;TSC22D3;MRAS;DDAH1;PDE8B;KIAA0040;PET112;CENPV;SUV420H1;NOL3
ARHGAP10	11	CCND3;POGK;SMCHD1;UNC119;TSC22D3;MRAS;PCTP;MARK1;ARRDC2;DDAH1;FBXW7
MAP1B	11	RAB30;CCND3;TLN2;PREB;TPPP3;MARK1;MED16;DHX15;CENPV;DDAH1;GBE1
KLF11	11	GPAM;PLEKHG6;KIAA0040;HDAC9;PSAP;PC;NR4A2;ARRDC2;LAMB1;ARHGAP6;BRE
GJA5	11	PLEKHG6;IPO11;TRO;ADAMTS2;CD44;C1QTNF7;PC;PLCD4;MAST4;KIAA0040;FBXW7
PCDH1	11	PDLIM7;MPZL2;ITGA1;TFPT;PODXL;TBX3;SMTN;PIH1D1;CYTH1;CPSF6;UGP2
TRAM1	11	FIGF;EPAS1;PLS3;ITGA1;IL16;PODXL;SMTN;OGT;TUT1;EDNRB;MID1IP1
ATP1A1	11	SLC39A10;ABI3BP;IQGAP1;MTUS1;PET112;PCOLCE;CENPV;FLNB;SLC35C1;SMOC1;CAV1
CDK17	11	ACSS3;TMEM80;PPM1M;ZNF449;PDE8A;LDLRAD2;FOSL2;SCRN2;ACAD11;DAPK3;FBXW5
RHOXF1	11	ADCY5;RAB30;CDKN1C;CRYAB;MRAS;PMEPA1;AGPAT3;CABLES1;PATZ1;MKKS;TBC1D16
CALD1	11	CCDC50;ACSL1;TANK;SPTAN1;DGAT2;TPM2;PC;TK2;LIPE;MARC1;GYG2
ACP2	11	MIF4GD;DGAT1;CD44;CD47;MMP19;ACAP3;HDAC9;RPGR;CLK1;SH3D19;MCM9
FAM168B	11	NFIA;HDLBP;ARMCX4;PSAP;PTGER3;PNKD;PXN;MED16;FBXW7;DUT;GSN
CCDC107	11	CCDC50;LIPE;KIAA0040;PEMT;GPT2;PRKAG2;TLN2;DDAH1;MED16;SUV420H1;PLIN1
SH3BGRL	11	DGAT2;MYH14;CD72;CNTN3;DGAT1;PC;LSP1;ACSL1;HDAC9;STARD13;EDNRB
HEG1	11	LPHN2;PDLIM7;DGAT1;DNASE1L1;CDK16;FRYL;CBLL1;ESAM;TXNIP;CXCL12;C10orf137
KCNAB1	11	LGALS12;STARD13;PDLIM2;EMILIN1;BBS1;DGAT2;INSIG1;FBXO32;RGS3;ITIH3;PDE5A
HSD17B10	11	COASY;SOS1;HDAC7;AQPEP;HSPB11;CAMTA2;CABLES1;CYSTM1;SMOC1;RER1;CLSTN3
FAM198B	11	CHAMP1;KIAA0040;CALM1;CCND3;RAB30;MAN1B1;MTUS1;FAM69B;PET112;CENPV;CPSF4
LTBP4	10	IL17D;TMEM88;AMPH;SPTAN1;SGCE;SPARC;ABI3BP;MME;FBLN2;NOVA1
PIK3R3	10	SPIDR;SBNO2;ABCG1;RASSF1;ADAMTS9;FAM120B;SLC22A23;LPCAT4;IFRD2;ITPR1
ZNF692	10	DDX17;SRSF1;DGAT1;MED23;ACAP3;DDRGK1;LAMB1;IL17RC;TESK1;MCM9
CCDC80	10	MED16;FXYD1;C1QTNF3;PCTP;PRR16;MARK1;IFI27L2;COL1A1;PCOLCE;TPRG1
PLEKHO2	10	DDX17;CDC16;DGAT1;LRRC32;ADAMTS9;DDX5;TTC37;DDRGK1;IL17RC;TESK1
AQPEP	10	ULK2;SLC39A10;WWP2;FXYD1;GLYCTK;CLMN;THRA;SMOC1;OSGEPL1;SPTBN1
USP31	10	SBNO2;IFRD2;MTR;USP2;TYMP;PNKD;MAGI1;DLC1;CCND3;STARD5
KCTD3	10	SCN4B;HDAC9;RASSF4;SCRIB;DDB2;MARK1;COL1A1;PCOLCE;BAIAP2;CXCL12
VIT	10	IL17D;RECK;FAM122B;TMEM88;TNNT3;FLRT2;ABI3BP;PMM2;FBLN2;MTA3
SOX12	10	PDLIM7;SPTAN1;UBTF;THRA;CHN1;COL5A1;FBLN2;S100A13;GSN;SEMA6A
SPARCL1	10	APMAP;WDR54;F8;LRRC32;ENPP2;ARHGEF3;MTUS1;ARRB1;CCND3;TRPV2
PRR26	10	HSF1;MAP3K8;RASGRF2;ADAMTS9;AKAP12;ABLIM3;NDRG1;FN3K;BRE;NRP2
UCHL1	10	PHPT1;ADCY5;MFI2;BID;CRYAB;MYO1B;NTRK2;MED16;PET112;IL17RE
GLUL	10	NPDC1;FAM120B;MECP2;PRKAG2;C1QTNF7;RAI2;RGS3;ZNF644;MAPKAPK3;GNAI1
ITPRIP	10	HSF1;MPZL2;SLC22A23;VWA5A;UCK2;SIDT2;MEF2C;DYRK2;AKAP12;NOSTRIN
ZNF512B	10	SRCAP;EPB41L2;ADAMTS2;PARP16;BID;C1QTNF7;SPARC;PNKD;MED16;SMOC1
ZNF580	10	ACADVL;RASIP1;P4HB;WRNIP1;IGFBP3;RNPEP;MXRA8;CST3;AGTR1;SLC27A3
CTTN	10	DDX17;UBE2Q2;HDAC9;CLEC4A;RBM26;MARCH6;TP53BP1;PXN;GABRE;MCM9
SMARCD2	10	C7orf49;KRT5;TSC22D3;ARRDC2;KIAA0040;MTUS1;FKBP2;SORBS2;HPGD;PPP1R14A
FADD	10	IL17D;MIDN;ACADVL;LHX6;RTN4;MRPS34;PALLD;CST3;DUT;GSN
MAPKAPK3	10	CALM1;RCL1;HRASLS5;PCTP;KIAA0040;PET112;CLSTN3;ZFAT;SUV420H1;SLC35C1
RASSF4	10	IL17D;COASY;RCL1;RXRA;MTUS1;KRT5;CENPV;EIF2S1;SUV420H1;SLC35C1
TNIP1	10	PLEKHG6;SAP18;MRAS;HRASLS5;KIAA0040;DHX15;CENPV;SMOC1;NOL3;AP006621.5
FAM219B	10	DDX17;ULK3;HMCES;ZNF740;HDAC9;TTC32;MED7;METTL13;MTERFD3;MCM9
MIDN	10	FHOD1;SBNO2;NR4A2;SLC25A25;C14orf28;SLC2A4RG;DDX5;RHOBTB1;HCLS1;TESK1
ITM2A	10	IL17D;TMEM88;WDR33;PSMF1;SGCE;ASPH;RNF103;FBLN2;CENPV;SH3KBP1
C20orf24	10	HSPA14;FXYD1;C1QTNF7;RXRA;PEX19;C7orf41;TK2;NXPH3;PATZ1;GYG2
CD34	10	MDK;THAP4;TMEM88;SPTAN1;CALML4;MTUS1;TNC;ABI3BP;GSN;CAV1
DGCR8	10	SPHK2;TWIST1;LRRC32;FAM219B;COL5A1;ACOT8;CENPV;HES4;CCND3;PDE8B
PDE1B	10	IL17D;CHAMP1;DPYSL3;OXA1L;C1orf213;ASPH;TNMD;ARHGAP6;ARHGEF40;CLSTN3
HDGFRP3	10	NPDC1;CFI;FAM69B;ACSL1;MTUS1;ENO2;PLIN1;REEP5;MARC1;CAV1
FNBP4	10	NFIA;SRSF1;ZNF740;COG1;ITGA6;RBM26;COL1A2;PXN;TNKS1BP1;CMIP
TEX30	10	RPTOR;SLC38A10;EHBP1;KCNMA1;ABI3BP;MTUS1;SMTN;ARRDC2;SYNPO2;CENPV
ENOSF1	10	PEX19;MYH11;SH3D19;EPC2;HIPK3;C7orf41;MIPEP;CD2BP2;RER1;MKKS
TM6SF1	10	FRYL;CD72;DGAT1;BIRC3;LSP1;TLN2;SERGEF;PC;AEBP1;IQGAP1
SRSF7	9	SBNO2;FOS;MYH11;COG1;ALS2;TYMP;IFRD2;SLC25A25;ADAMTS9
ALDOA	9	ALG8;DIAPH2;LARP6;F8;ZNF385A;TBRG4;ARRDC2;BIN1;NOL3
MYZAP	9	MIDN;PPM1G;ACADVL;PEMT;CDKN1C;TFG;FBXL19;CST3;SMAD6
FABP4	9	FBXO32;F8;PRKAG2;C1QTNF7;NTM;KIAA0040;CENPV;ARHGAP6;MSR1
LGALS3BP	9	IL17D;PLEKHG6;FXYD1;CALM1;WDR86;ARRDC2;PCOLCE;SUV420H1;NOL3
FMNL1	9	SMAP2;SH3D19;SPTAN1;ABI3BP;RBM26;PARP16;EMG1;FBXO7;FBLN2
DARC	9	SPIDR;PLS3;CMIP;SBNO2;TPD52;CLDN15;PRKCE;DUSP23;CD79B
SESN1	9	FHOD1;DGAT1;TPPP3;RASSF4;SLC2A4RG;RAI2;COL1A1;COL6A1;CWC15
EPHX2	9	PEX5;TRO;ITGA1;PPM1M;TCEA2;PC;PLCD4;SORBS1;BCL6
APP	9	COL18A1;GSTT1;CFI;F8;ANKRD13A;IQGAP1;MTUS1;MYH14;CLSTN1
CPEB4	9	CCDC50;PHF15;GPT2;TWIST1;DGAT2;RXRA;SREBF1;RGS3;TXNDC5
FAM193B	9	DDX17;PSMF1;CLMN;WDR33;DDRGK1;SNED1;INO80E;TBC1D16;TESK1
MYD88	9	PDLIM2;MFGE8;PSMB10;DGAT1;CDK16;HDAC9;PC;IFRD2;CYTH1
VAMP1	9	SRSF7;SRSF1;RNASEH2C;PHF21A;ZNF84;TEX261;ARGLU1;CPSF6;MCM9
PACSIN2	9	CCDC50;CALM1;TSC22D3;CDH23;MRAS;ARHGEF3;AEBP1;ARRDC2;CCND3
ZMAT1	9	SBNO2;PCGF5;FXYD1;USP2;OSGEPL1;TEX10;CTSF;THRA;PEX19
CUL7	9	CCDC50;ADCY5;HDAC9;ASPH;SH3GLB1;RXRA;PEX19;C7orf41;TBC1D16
ENDOD1	9	COL18A1;PDLIM2;FXYD1;DGAT1;PKIG;PC;COL1A1;MBNL2;MSR1
MYSM1	9	TM6SF1;SYNPO2;ITGA1;UBTF;TMEM55A;DHX15;PPP3CA;MPDZ;RNMT
NDRG4	9	WWP2;FXYD1;WDR86;C7orf41;RER1;CABLES1;SMOC1;TBC1D16;CLSTN3
PTPRF	9	FAM50A;TRO;FXYD1;OSGEPL1;GLYCTK;SORBS1;PPP1R16A;MTERFD3;PDE8B
EPHA2	9	FHOD1;G6PD;HCCS;RPGR;UBTF;VCL;ABLIM3;LAMB1;FBXW5
SMPD3	9	AGBL5;PEX5;WNK1;MITD1;ADARB1;PLCD4;FBXO32;THRA;MAPKAPK3
C19orf80	9	TRAF3;HRASLS5;F8;C1QTNF7;PEX19;HSPB11;ARRDC2;NOL3;ARHGEF40
PARD3B	9	IL17D;TMEM88;MKNK2;C7orf41;COL5A1;MED16;SORBS2;REEP5;FBXW7
C4orf48	9	MIDN;PNPLA2;TFG;CST3;ACSL5;IGFBP3;PALLD;DNM2;TRIM47
TSC22D3	9	KRT5;SESN1;CCND3;KIAA0040;PRDM1;ARRDC2;COL1A1;LAMB1;BCAR3
CCNL1	9	EPAS1;NPDC1;LRRK2;THBS1;SMTN;YARS;PXN;C5orf58;ITGAE
LDOC1L	9	ADAMTS2;UNC119;UBTF;FAM219B;COL5A1;DMPK;COL6A1;CENPV;FBXW5
CCNG2	9	USP2;CELF2;CTSF;COL1A2;PPP1R21;TGFBI;PMM1;MECP2;VPRBP
GRN	9	MDK;DTX1;VSIG4;LSP1;RXRA;CD37;CNTN3;AEBP1;ZNF385A
MAP3K6	9	F8;TSC22D3;PKIG;CRTC1;CCND3;ABLIM3;CENPV;SCRN2;FBXW5
TEX261	9	AGBL5;CHAMP1;TLN2;RXRA;PEX19;CRTC2;AEBP1;DMPK;SUV420H1
MRPL46	9	AMPH;SLC39A10;SH3GLB1;NTM;ABI3BP;CENPV;REEP5;ATP2B4;MSR1
TIMP3	9	PTTG1IP;HDAC9;DGAT2;CDK16;RBM26;MTUS1;TNC;PARP16;TXNDC5
KLHL26	9	DDX17;KRT5;HES4;TSC22D3;MED26;COQ9;KIAA0040;NT5DC2;DGKD
SERPINA5	9	IL17D;FAM122B;FXYD1;SPTAN1;GLYCTK;WDR86;PCOLCE;ABI3BP;SMOC1
RPL28	9	CAPZB;TMEM123;MFSD1;ASPH;CELF2;ITGA6;MDH2;BCL9L;MKKS
TRIP10	9	FAM122B;DNMT3A;SPTAN1;LSP1;SPARC;MED16;FBXW7;UGP2;GSN
NR3C2	9	DGAT1;ACSF2;PSAP;MEF2C;IFI16;RGS3;TXNDC5;MCM9;S100A16
TMEM25	9	CCDC50;PTPN23;LIPE;GLYCTK;IL17D;PEX19;ABCB6;CABLES1;PDE5A
UAP1	9	LARP6;C1QTNF3;GNPDA1;PSAP;ABLIM1;MID1IP1;FBLN2;UGP2;PXN
BHLHE40	9	DDX17;MPZL2;PDLIM3;LRRC32;TPM2;ANKRD37;PML;HES4;SDCBP2
ARID5B	9	FHOD1;SLCO3A1;PHF21A;RASSF4;SLC2A4RG;SMG6;CENPV;SCRN2;GNAI1
SERTAD3	9	CLEC10A;DDX17;MPZL2;RNF103;MTRR;CLK1;CLK4;TESK1;MCM9
LYL1	9	ARRB1;DDX17;SOCS2;RPGR;PSMF1;DDRGK1;ACAP3;RGS3;VPRBP
KIAA1107	9	DGAT1;MARS;CLMN;MARC1;ABCA6;PRKACB;PATZ1;TBC1D16;CLSTN1
NTRK2	9	IL17D;IGF1;PLEKHG6;SLC2A4RG;TNMD;COL5A1;CENPV;TPRG1;CAV1
RHOBTB1	9	IL17D;PRKAG2;TSC22D3;EHBP1;CEPT1;WDR33;DDRGK1;ABI3BP;SUV420H1
CREBRF	9	ADD3;FZD6;EPC2;TEX10;CTSF;CRTC1;PNPLA7;MYBBP1A;FBXW5
MTMR3	9	SPATA13;ADD3;RNF166;CFI;MTR;ITGA1;BAZ1A;COL1A2;EPS8
UCN	9	MIDN;RASIP1;LONRF1;RILP;DUT;IGFBP3;XBP1;RNASET2;ATOH8
FAM76B	9	MYH11;TNNT2;ANXA6;CRTC1;NR2C1;PLEKHA1;C9orf72;IL17RC;CFL2
C17orf59	9	YARS;ABLIM1;PXN;FKBP2;SAMD4A;CLK1;GATA2;POLR2H;CLSTN3
A2M	9	NFIC;GPAM;SNAPC2;COL18A1;ITGA1;LSP1;TBX3;PXN;DENND1A
RIT1	9	DDX17;MYH14;ARIH1;DGAT1;FAM69B;WDR33;SRSF1;BCL6;TESK1
TMEM123	9	PRKCH;DYSF;ANKRD13A;UBTF;SH3GLB1;NPNT;PEA15;ABLIM1;GPR133
CCR1	9	CD53;NCF4;DCLK1;RAB6B;SNED1;PNKD;VIT;HMHA1;ATXN7L1
CLK4	9	CREBZF;TMEM259;ARMCX4;PSAP;KIAA1462;THRA;MEF2C;PXN;SYNPO2
COL6A6	9	ADAMTS2;TLN2;LSP1;BIRC3;C7orf41;TK2;IDE;SELP;SGCE
GPSM1	9	RAB34;PCGF5;HDAC9;DGAT2;RXRA;ADARB1;PNPLA2;HLTF;CALML4
NAA25	9	NFIA;IPO11;FAM50A;MBTPS1;CASC3;PLCD4;COL5A1;IGFBP7;CDC42BPA
IL6	8	SPIDR;UPP1;SBNO2;SOCS2;ADAMTS9;THBS1;SLC25A25;DUSP23
ZNF449	8	SLC20A2;CD2BP2;IFT27;NFATC1;MKNK2;CLDND1;MBOAT2;SH3D19
C8orf4	8	NEDD9;MPZL2;SLC22A23;RCL1;NSFL1C;FOSL2;TUT1;PDE8B
ARL5B	8	COASY;PREX2;TMCO3;ADAMTS9;UPP1;NDRG1;MPZL2;TMEM2
MFAP4	8	IL17D;PLEKHG6;CALM1;SELENBP1;TSC22D3;PSAP;IFI27L2;PCOLCE
OGN	8	DCN;FXYD1;ISLR;COL14A1;IFI27L2;COL1A1;PCOLCE;SETX
SLCO4A1	8	LAMA4;F8;TSC22D3;RXRA;ANKRD37;CENPV;ARHGAP6;GEM
PEX19	8	ASPH;C7orf41;SEC24C;ABCC3;PLIN1;TBC1D16;MARC1;GYG2
PTPRM	8	DTX1;F8;COG1;TLN2;CLSTN1;MTUS1;CLPB;CCND3
PPL	8	SLC7A8;SYNGR1;SPTAN1;CAMK2D;ACOT8;S100A13;UBN1;GSN
DMTF1	8	EPAS1;SRSF7;SLC25A46;HDAC9;BIRC3;LSP1;PSAP;PXN
CCDC115	8	LARP6;BNC2;DGAT1;CD47;SLC38A2;HDAC9;KIAA1217;DPM2
ST3GAL5	8	SPTAN1;USP2;SMAD3;DDX5;ABLIM1;ACOT8;FBLN2;FAM219B
ATXN7	8	IPO11;GPATCH2;DCLK1;PUF60;PNKD;TIAL1;ITGA1;ZNF800
PTPRK	8	MDK;F8;CCND3;TLN2;RAPGEF5;TM4SF18;TBC1D16;S100A16
RPRD2	8	DDX17;SESTD1;MED23;VCL;BICD2;DDX5;FBXW5;MCM9
CDKN1B	8	MPZL2;LRRK2;SLC22A23;SLC25A25;YARS;CHI3L1;FOSL2;HES4
BBS10	8	IGF1;MFGE8;CDKN1C;CELF2;RGS3;TGFBI;MKKS;HEMK1
C10orf137	8	VAMP1;HECTD2;LGI4;TSC22D3;TMCC1;RBM26;TTC32;MTERFD3
LRRC8A	8	MYH11;ITGA1;USP2;MTUS1;SMTN;BCL6;CREB5;HMG20B
GLIS1	8	SLC39A10;PLEKHG6;NTRK2;PEX19;C7orf41;SMOC1;MKKS;CLSTN3
CEBPG	8	HSF1;ADCY5;COASY;ADNP;CD2BP2;FYCO1;SMOC1;IVNS1ABP
CBX4	8	FHOD1;CCDC39;ITGA1;RASSF4;SLC2A4RG;DYRK2;BRD4;SIGLEC1
FAM180B	8	IL17D;CCDC39;SPTAN1;LSP1;PXN;ABI3BP;FBLN2;ZNF423
YPEL2	8	SEC24C;IFRD2;MFGE8;MECP2;LCAT;DDX5;TYMP;KIAA0040
NPR3	8	DMD;TRO;MFI2;EPB41L4B;C1QTNF7;KIAA0040;PET112;SUV420H1
SPTBN1	8	WWP2;CENPV;PET112;MED16;ABI3BP;PMM2;FBLN2;TPRG1
KIRREL	8	SDR39U1;PDLIM7;ADAMTS2;UBTF;PNKD;TXNIP;ARHGAP6;MXD4
PPM1F	8	PCED1A;ZBTB16;FOSL2;ITGA6;MPZL2;CLK1;SUV420H1;GLCE
PCK2	8	DNMT1;EXOC6;FXYD1;ODF3B;GLYCTK;FBXO22;HEBP2;PSMB4
KLF16	8	ADD3;EML3;FAM150B;IGFBP3;PPP1R35;FOSL2;GRASP;TRIM47
AIF1L	8	DGAT1;CDK16;FAM120B;HDAC9;KIAA0040;TXNIP;CXCL12;PTS
CEBPB	8	NPR3;SYNGR1;TRIM47;CLK1;PEX19;DMXL1;CST3;PATZ1
AR	8	FXYD1;PFKFB3;EHBP1;SLC38A10;KIAA0040;CENPV;C7orf49;PDE8B
IGFBP7	8	FAM69B;CDH23;ACAP1;MTUS1;RAI2;RAB30;CENPV;CAV1
LPL	8	PLEKHG6;TM7SF2;DGAT2;ASPH;PNPLA2;SORBS1;STK39;MAPKAPK3
WDR1	8	PLS3;PDLIM2;PLEKHG5;DGAT1;RABGAP1;PRKAG2;SH3BGR;TXNDC5
PPP1R12A	8	STARD13;PRKAG2;GATM;SMTN;FBXO32;DTNA;PHLDB2;ATP2B4
PALLD	8	DGAT2;TLN2;SYNJ1;DMPK;AEBP1;CAPG;TXNDC5;GYG2
NOP2	8	NLE1;IFT27;USP2;TBRG4;CRTC1;ARHGAP12;FBLN2;MECP2
TMCO6	8	SRSF7;PPM1A;TLN2;AKAP8L;RARS;TMEM2;PSMB4;TBC1D16
CYYR1	8	F8;TLN2;FAR2;PSAP;SLC35A2;RGS3;SELP;ITGAE
ITIH3	8	PDLIM7;FBXO32;GATM;VCL;MTUS1;TNC;MOB2;PPP1R14A
TMEM132C	8	PPM1A;FXYD1;CCND3;ASPH;ABCB6;PPP1R16A;MKKS;TXNDC5
VEGFA	8	COPZ1;EPB41L2;MAPKAPK3;NCLN;RGS3;CABLES1;SMOC1;BIN1
NR2F6	8	RASIP1;RILP;TFG;UBTF;IGFBP3;MXRA8;EDNRB;ATOH8
SOD3	8	IGF1;MXRA8;MRPS25;CST3;ST6GALNAC6;HNMT;SLC27A3;GNAI1
UTRN	8	FRYL;DTX1;TLN2;ARID1A;VCL;MTUS1;FLNB;IQGAP1
PER1	8	SLC7A8;SMCHD1;TACC1;PKIG;SIDT2;PRDM1;TRIB2;IVNS1ABP
CD69	8	HECTD3;SMCHD1;MFI2;CD7;PRDM1;CENPV;TMEM2;PQLC1
GART	8	SRSF7;PSAP;EPC2;RXRA;HIPK3;ZNF518B;PATZ1;TLN2
SNRK	8	RARA;RASGRF2;NR4A2;LRRC32;ADAMTS9;SLC22A23;BRE;ITPR1
FADS3	8	KIAA0040;DIAPH2;CDH23;CRYAB;C7orf41;MED16;CABLES1;UGP2
HERC5	8	IL17D;TMEM88;MED16;TSC22D3;KRT5;CENPV;DDAH1;MSR1
RCC1	8	PPM1A;MTR;CTSF;THRA;MKNK2;SEC24C;TUT1;FBLN2
LAMB2	8	NCBP2;FXYD1;CCND3;FAM69B;WDR86;MARK1;COL1A1;PCOLCE
PIDD	8	ARHGEF11;RBM42;CLDN15;PKIG;TBRG4;ABCA6;FBXO32;RPRD2
NOC3L	8	UBTF;ITGA1;ACSF2;GNPDA1;TXNIP;PXN;LAMB1;UGP2
HSPA13	8	CAPG;JHDM1D;ITGA1;FASTK;ITPA;AEBP1;PMM1;CLSTN3
ETS2	8	SBNO2;COL18A1;ADAMTS9;THBS1;LPCAT4;COL5A1;CENPV;ITPR1
AHSA1	8	DDX17;PLSCR4;SLC52A2;MKNK2;PARP10;AP2M1;HLA-DMB;PLXDC2
TMEM14A	8	PLOD2;TXNDC5;RXRA;ICA1;CFL2;FKBP2;ATF1;FBXW5
ZNF750	8	TRIM29;RTN4;C3orf55;EGFL7;FBXO3;ABLIM1;DDAH1;CAV1
BTAF1	8	NPDC1;FKBP10;MTUS1;ITGA1;FAM69B;SLC35A2;MKKS;MCM9
XPO1	8	VAMP1;RECK;SRSF7;CD47;PTGER3;SLC2A4RG;HES4;ITGAE
RBPMS	8	GPAM;SYNGR1;SPTAN1;LSP1;VCL;LYNX1;SMTN;ATP2B4
MYL9	8	PDLIM7;SYNGR1;PRKAG2;ARHGEF3;TRIM35;HDAC9;AEBP1;SH3BGR
COX14	8	CRTC1;SRSF7;HIC1;DGAT1;SLC2A4RG;HERC3;PNPLA7;BCKDK
CHN1	8	SLC44A1;FAM69B;SGCE;GPT2;TLN2;MTUS1;C14orf180;UGP2
ZNF10	8	MYH11;STARD13;USP2;TEX10;CTSF;TYMP;FBXO32;TCF25
EMP1	8	IL17D;ARID5B;SLC3A2;ADAMTS9;PXN;DHX15;MME;GSN
ASAH1	8	MFI2;LSP1;TLN2;C7orf41;CABLES1;ZFAT;MAPKAPK3;ARHGEF40
MAP3K5	8	MDK;MKNK2;SPTAN1;TNMD;WDR86;MAGI1;CABLES1;BCL6
TBX19	8	RBM26;SRSF1;ALS2;DCLK1;NAV1;DDRGK1;FAM219B;JTB
MFNG	8	COASY;MPZL2;IPO11;SEPT1;PSAP;CALML4;SEMA4D;CLSTN3
GNG11	8	LONRF1;RAPGEF5;TPD52;PALMD;ABLIM1;BCL6;MAPKAPK3;CAV1
GIMAP5	8	HECTD2;PCGF5;CCND3;EPC2;SIDT2;ABLIM1;CENPV;NRP2
FRY	8	MDK;SESN1;F8;USP2;SIDT2;TYMP;KIAA0040;THBS4
HPS6	8	PNKD;PSAP;IL16;ITGAE;COL5A1;TPK1;FBXW5;BCAR3
ZNF853	8	MDK;SPTAN1;IL16;COL5A1;TXLNA;CENPV;S100A13;GSN
ALDH1L2	8	KIAA0040;MFGE8;CREB5;CAMTA2;ARRDC2;PPP1R14A;FRMD1;MSR1
MGAT4B	8	IGF1;IPO11;TRO;PRKAG2;C7orf55-LUC7L2;CENPV;CYP4X1;PDE8B
PRR16	8	USP2;RGS3;ACOT8;DDRGK1;LAMB1;FBLN2;MAPKAPK3;FAM219B
KLF2	8	BACE2;TMUB1;MFGE8;RXRA;IGFBP3;ACAA1;STXBP6;TRIM47
CTIF	8	TRO;DIAPH2;MRAS;PEX19;DDX5;C7orf41;KIAA0040;FBXW7
PDE4B	8	PMP22;RASGRF2;NR4A2;CREB5;PRKCE;SLC22A23;BRE;ITPR1
ADAT2	8	FAM122B;TC2N;SH3D19;LSP1;COASY;LDLRAD2;FBLN2;CD47
FAM208B	8	FAM122B;IPO11;GNPDA1;CTSF;POLR2H;AQPEP;STARD9;ENTHD2
CEP290	8	DDX17;NPDC1;MYH14;ZDHHC9;FAM69B;FBXO4;RNF103;MCM9
SGSM3	8	DDX17;NPDC1;PDLIM2;DDX5;IFI16;LAMB1;TXNDC5;S100A16
BYSL	8	DDX17;IFRD2;CTSF;DDX5;YARS;SLC5A6;FBLN2;PHF23
CYP2E1	8	CD2BP2;PEX5;VAMP4;CALM1;CD44;CGGBP1;CLK4;PLXDC2
ZNF775	8	ACADVL;RILP;ALG2;NTN4;PTGER3;ZNF174;SREBF1;SLC1A5
CORO6	8	COASY;ATP2A2;LARP6;SPTAN1;PXN;CYP4X1;SEPT1;MID1IP1
MACROD1	8	GTF3A;IFT140;NFATC1;OSGEPL1;EPB41L3;SCRIB;DNM2;DDB2
OGT	8	NFIC;RNASEH2C;HDAC9;LSP1;RBM26;TEX261;PXN;UBXN1
CNST	8	C19orf66;COASY;RASGRF2;GLDN;LMO3;MSH6;RBM26;CYP4X1
SLC38A2	8	SESTD1;INPP4B;SLC2A4RG;FAM69B;MARK1;ARRDC2;CABLES1;CENPV
DFNB31	8	ADAMTS2;PSMF1;PTGER3;RNF103;PRKCDBP;LAMB1;TCF25;TANC2
TMEM47	8	MYH14;DYSF;AEBP1;LSP1;PC;PIGT;SYNJ1;CLSTN1
PDGFB	8	PLS3;SOCS2;ZNF385A;MTUS1;STARD9;ABLIM1;SCHIP1;SCML1
GPAM	8	NFIA;MRAS;LYNX1;ARRDC2;ARHGAP6;ZFAT;C14orf180;YBX2
CALHM2	8	IL17D;DDX17;SPTAN1;CALML4;FLRT2;MARS;SNED1;FBLN2
KRT10	8	KLF13;HEATR2;GBP2;TNNI2;TPR;KRT5;PCOLCE;SMARCA4
ABHD5	8	IL17D;KRT5;KIAA0040;SPTAN1;MRAS;ARRDC2;CENPV;MSR1
TDRKH	8	SH3GLB1;APBB2;DOK2;FAM69B;RER1;MKKS;HEMK1;MARC1
DLL1	7	RARA;NR4A2;LMO2;FAM120B;SLC22A23;ITPR1;CLSTN3
NR4A2	7	NEDD9;GLDN;CREB5;ADAMTS9;STX4;FN3K;BRE
CISH	7	GPT2;LIMCH1;PRKAG2;C1QTNF7;RGS3;BCL6;TXNDC5
RGMA	7	SPIDR;CCDC39;SYNGR1;SPTAN1;SGCE;ABI3BP;FBLN2
ADAMTS1	7	SPIDR;NR4A2;ADAMTS9;MBOAT2;CENPV;BRE;IVNS1ABP
CTTNBP2NL	7	BIRC3;RXRA;MTUS1;CENPV;TXNDC5;IQGAP1;CAV1
KIAA1239	7	COPZ1;CALM1;NTRK2;MED12;CABLES1;FBXW7;CLSTN3
ATF3	7	SRSF7;MPZL2;CREB5;UPP1;THBS1;SEC24C;BRE
CEPT1	7	MTUS1;CCND3;RXRA;PALMD;WDR86;TMEM2;TXNDC5
PMM1	7	COPZ1;CCDC50;C1orf213;RER1;CABLES1;SMOC1;CLSTN3
CLEC11A	7	RAB34;IGFBP3;COL1A1;CST3;S100A13;XBP1;GSN
ADA	7	ACOT8;LSP1;CELF2;IFI27L2;MED16;FBLN2;GSN
AOX1	7	TMEM88;WWP2;SLC7A8;KRT5;CENPV;DDAH1;FBXW7
SLC17A7	7	SLC44A1;SYNGR1;SPTAN1;SGCE;TNC;ABI3BP;FBLN2
SIDT2	7	CDKN1C;ITGA1;TLN2;CYP4X1;MAPKAPK3;LDHB;CLSTN3
AGFG2	7	VWA5A;USP2;THRA;SCHIP1;TGFBI;CCND3;S100A16
CFD	7	IPO11;ADAMTS9;CTSF;ABI3BP;FBLN2;PQLC1;GSN
ESYT1	7	IGF1;HSPA14;CDKN1C;ADAMTS9;MMP19;MAPKAPK3;CLSTN3
C10orf10	7	CNR1;SPIDR;ABCG1;FAM219B;ARRDC2;COL6A1;FBXW5
MFHAS1	7	ZBTB16;SLC7A8;NAA30;MARCH5;CYTH1;NUP214;GNAI1
ELANE	7	AMPH;SGCE;COASY;MED16;ABI3BP;MSR1;GSN
UBAP1L	7	TNFSF12;SRSF7;FRYL;ITGB4;BIRC3;WDR33;ZNF800
SORBS2	7	CABIN1;HDAC9;KCNAB1;ICAM2;MOB2;ITIH3;TXNDC5
GAS7	7	LSP1;CELF2;ABLIM1;ZNF423;ABI3BP;FBLN2;SGCE
POU2F1	7	ANXA1;EPS8;RNASEH2C;MTR;CALML4;TIAL1;C9orf72
LOXL2	7	PMP22;WWP2;EPB41L4B;MTUS1;MED16;DDAH1;PPP1R14A
MAN1A1	7	IL17D;PLEKHG5;CALM1;SCPEP1;PCOLCE;SUV420H1;CAV1
CENPT	7	MED23;UBTF;COL14A1;OSR2;PXN;DHX15;IP6K2
ZNF189	7	SCFD1;CD2BP2;PSMD11;CSTF3;PCOLCE;PCNX;CXCL12
ITGB2	7	ZNF385A;PSAP;RXRA;CLSTN1;PRKACB;CD37;LSP1
MLLT4	7	PDLIM2;MTR;CADPS2;ARRDC2;ITGA1;CENPV;ARHGAP6
S100A6	7	CCDC50;ADCY5;MTR;UBTF;KIF22;PARP16;SMOC1
MYCT1	7	C19orf66;SBNO2;TMEM259;OGT;MEF2C;FOSL2;NRP2
ELF1	7	CCND3;RXRA;INPP4B;WDR33;CENPV;TMEM2;BCL6
ACACA	7	PMP22;PDLIM2;DGAT1;HDAC9;DLAT;SREBF1;TESK1
ELK3	7	ITGB4;CFI;CLDN15;THRA;MTUS1;SLC35A2;IQGAP1
RICTOR	7	DDX42;MBTPS1;UBTF;TIAL1;C9orf72;FBXW5;STARD5
ORMDL1	7	L3HYPDH;SRSF1;RAB30;ARMCX4;ACOT8;XPR1;MTERFD3
ZBTB21	7	DDX17;PCED1A;IPO11;THRA;TYMP;IFRD2;BRE
RGS5	7	F8;CCND3;RXRA;NTRK2;MTUS1;PET112;GSN
CDR1	7	PTPRS;FXYD1;SEPHS2;ACSF2;ASPH;RXRA;C12orf39
SERTAD4	7	CALM1;WHSC1L1;CENPV;ARHGAP6;HNMT;BCAR3;ARHGEF40
CCDC71L	7	SPIDR;SESTD1;LRRK1;SBNO2;RASSF4;SLC25A25;PCOLCE
TRAM2	7	TTLL5;SMG6;MECP2;TXNIP;ACOT8;COL6A1;BIN1
EPHX1	7	NIN;SPTAN1;C1orf213;PLEKHG6;SMOC1;NOL3;ARHGEF40
HIST1H2AC	7	NFATC1;DIAPH2;MKNK2;C1QTNF7;C7orf41;HTRA3;TYW3
AHDC1	7	GPAM;ANO8;MFGE8;ACAP3;SCHIP1;KIAA0040;SUV420H1
AOC2	7	KRT5;BID;PEX19;KIAA0040;CABLES1;ZFAT;NOL3
ROMO1	7	TNFSF12;ZNF337;ISLR;ADAMTS2;ZNF579;CKLF;PSME4
LRRC17	7	COL1A1;NTRK3;RAI2;ARRDC2;RGS3;PJA1;PPP1R14A
LAPTM5	7	CD72;ZNF385A;CDK16;PTK2B;PRKACB;TXNDC5;VSIG4
PRKAG2	7	RPTOR;DIAPH2;SPTAN1;SGCE;VCL;GATM;ATP2B4
MTSS1L	7	SPTAN1;UBTF;UBFD1;NMT1;MME;ABI3BP;SH3KBP1
HOXA9	7	FHOD1;SPIDR;ACVR2A;DYRK2;MARK1;WDR33;CENPV
ANGPTL5	7	IL17D;SPTAN1;NOVA1;NMT1;ABI3BP;FBLN2;MSR1
LRRC16A	7	PLEKHG6;FAM69B;BTD;COL5A1;CENPV;DDAH1;GNAI1
FAM13A	7	DDX17;PDLIM2;DDX5;DGAT1;DNASE1L1;MTR;CXCL12
SESN3	7	DDX17;SOS1;DGAT1;ZNF84;RBM26;DDX5;DDB2
CYP4B1	7	TMEM88;COL5A1;KRT5;PET112;ABI3BP;REEP5;DDAH1
MEF2D	7	DIAPH2;CABIN1;LNX1;TSC22D3;TXLNA;BCL6;HES4
HES6	7	ARHGEF11;SRSF1;ADAMTS2;PRPF38B;CTSF;PNPLA7;ITPR1
PHF23	7	DDX17;MTR;ACAP3;MFSD10;ZNF623;CLK4;VPRBP
TLN2	7	TJP2;PCGF5;FXYD1;HDAC9;TEFM;WWP2;ITPR1
CH25H	7	HSF1;SLC22A23;ADAMTS9;THBS1;FAM120B;BRE;ITPR1
CASKIN2	7	ARRDC2;DGAT1;ADAMTS9;FAM120B;IFRD2;ITPR1;ST6GALNAC3
FRMD3	7	APMAP;F8;PSAP;RGS3;LAMB1;TXNDC5;MCM9
C14orf28	7	DDX17;HDGFRP3;CLMN;PRKAG2;VCL;DDX5;RPRD2
PTX3	7	COPZ1;PCED1A;PARP16;SPTAN1;NOVA1;FBLN2;SMOC1
FOXC1	7	BACE2;DOCK6;LRRC32;KCNAB1;MEF2C;MTRR;LSP1
TMEM204	7	SLC44A1;RASGRF2;FAM50A;ITGA1;MTUS1;COL1A2;SCHIP1
GUCY1A3	7	PDLIM2;PPP6C;KIAA0040;MOB2;ITIH3;PHLDB2;MSR1
LRP1	7	FXYD1;HDAC9;SPTAN1;ABI3BP;CENPV;FBXW7;GSN
ZNF579	7	ACADVL;CTDSPL2;RBPMS2;WRNIP1;IGFBP3;DUT;GSN
ADRB2	7	GPAM;RASGRF2;CDH23;DYRK2;KIAA0040;IVNS1ABP;FBXW7
COMMD8	7	ZBTB1;PLOD2;CYP26B1;GULP1;GBE1;TXNDC5;GNAI1
GRASP	7	NR4A2;ADAMTS9;FAM120B;SLC22A23;PKP1;ITPR1;HES4
SMO	7	MDK;TRO;BNC2;SPARC;C7orf41;DNM3;PDE8B
GPR3	7	ABCG1;BACE2;CD47;LPCAT4;MARK1;FAM219B;GNAI1
ATP13A2	7	CD2BP2;ZBTB16;SLC7A8;TIAM2;SREBF1;HMG20B;STARD5
ST6GAL1	7	ACSL1;ENPP2;IL16;THRA;ABLIM1;CYTH1;CMIP
SNAI2	7	GPAM;DMD;MTUS1;ABLIM1;ARRDC2;SUV420H1;PPP1R14A
TRAF1	7	PEX5;TRO;DIAPH2;CD44;PSMF1;CLK4;PDE8B
DRAM2	7	IL17D;CCDC50;SGK2;SLC7A8;RXRA;BOC;IQGAP1
AGPAT9	7	SMAP2;CDKN1C;CCND3;TLN2;MRAS;PCTP;CLSTN3
CIDEA	7	PPM1A;FXYD1;F8;RXRA;CTSF;CENPV;MARC1
C11orf96	7	SPIDR;PDLIM7;LAMB1;MXRA8;MOB2;TRIM47;SLC27A3
RGP1	7	TRO;MBTPS1;PNP;UCK2;THRA;CYTH1;CLK1
PEAR1	7	CREB5;VCL;THRA;TBX3;PXN;SLC5A6;HMG20B
DUSP1	7	NEDD9;FAM160A2;MPZL2;SLC22A23;NOSTRIN;DIXDC1;CLK1
PLEKHF2	7	SBNO2;HDAC9;UNC119;ZNF385A;EPC2;PXN;SLC25A25
MRGPRF	7	PDLIM2;COL1A1;PSAP;COL1A2;ACOT8;RGS3;MOB2
PARM1	7	VAMP1;IGF1;HDAC9;ARHGEF3;RXRA;MTUS1;AEBP1
CILP	7	IL17D;FAM122B;PARP16;IFI27L2;ABI3BP;MME;FBLN2
PRMT7	7	PEMT;FXYD1;TLN2;C1QTNF7;DECR1;MAPKAPK3;SMOC1
APBA3	7	CAPZB;DCLK1;SENP3;N4BP2L2;COL1A2;CDK16;POLR3H
NMT1	7	IL17D;GPAM;PLEKHG6;C1QTNF7;PLCD4;MAST4;TPK1
DENND4B	7	CD47;THRA;MAP3K11;MCMBP;FBLN2;LSP1;SEMA6A
CD93	7	RPTOR;PMP22;WDR54;ARAP3;TBX3;LRRC32;MTUS1
SKIL	7	UBP1;CDC16;DGAT1;TBRG4;NR4A2;DDRGK1;ARHGAP6
EFNA5	7	HSPA2;PGRMC2;SLC44A1;SPTAN1;PRKAG2;DYNC1LI2;MTA3
SRRM2	7	IL17D;RECK;SCRIB;CELF2;SLC2A4RG;PXN;DNM2
MFAP3	7	VCL;SMTN;ABLIM1;RNF111;COL1A2;FLNB;CMIP
KIF26A	7	ZBTB16;PPFIA1;COL18A1;PSAP;THRA;MYO18A;ITPR1
MKL1	7	ARRDC2;MFGE8;RAI2;PCTP;KIAA0040;PCOLCE;CENPV
CLU	7	CALM1;SELENBP1;TMCO3;MME;C7orf41;NTM;TUT1
PPM1D	7	SPIDR;ACSF2;RXRA;CD37;FAM69B;WDR33;ATG5
GAS2L1	7	FXYD1;CCND3;INPP4B;PEX19;MKKS;HEMK1;TBC1D16
LOX	7	WWP2;KIAA0040;HDAC9;CDH23;RCL1;KRT5;PET112
SPG20	7	SLC20A2;SIX5;ELMSAN1;PSMB4;MAPKAPK3;PLXDC2;GNAI1
NEK7	7	ZBTB1;GSPT1;RAB30;MFI2;C1QTNF7;GBE1;TOPORS
C8orf82	7	ACADVL;IGFBP3;RILP;C7orf43;MRPS14;MTA2;SEMA6A
GIMAP7	7	MPZL2;F8;TLN2;EGFL7;FAM120B;ABLIM1;SLCO4A1
ARHGDIB	7	APMAP;MYH14;DTX1;CCND3;MTUS1;CAV1;PPP1R14A
PAXBP1	7	MYH11;OGT;USP2;UBTF;PXN;ACSF2;CAV1
COL5A2	7	SNRNP40;MFGE8;CCND3;RAI2;PCTP;MOB2;STARD5
MFSD6	7	FXYD1;CLDN15;TMCC1;NDUFAF6;SLC35A2;BCL6;TXNDC5
MID1IP1	7	PCED1A;PC;SPTAN1;PNPLA2;KIAA0040;ATP2B4;YBX2
ZCCHC3	7	RECK;UBTF;RASSF5;IGFBP3;PXN;ACOT8;HES4
FBLN2	7	IL17D;DPYSL3;SYNGR1;ASPH;COL1A1;ABI3BP;GSN
FARS2	7	CREBZF;HSF1;GPAM;ITGA1;CCND3;GSK3B;IRX2
ADAMTS9	7	SBNO2;UPP1;SOCS2;ITGA1;THRA;SCHIP1;PLCD1
HOXB2	7	ABCG1;TMEM62;MPG;SLC9A3R1;IGFBP3;MXRA8;PPP1R9B
DAGLA	7	CNIH3;PREX2;HMG20B;CENPV;HNMT;PDE8B;GNAI1
NEXN	7	GPT2;CCND3;PRKAG2;ZBTB47;BCL6;DDAH1;GYG2
EGFLAM	6	IGF1;PEMT;HRASLS5;RGS3;BCL6;MAPKAPK3
DES	6	MYH11;PDLIM7;CYFIP2;WNK2;SMTN;P2RX1
ADAMTSL4	6	LSP1;ACSL1;TLN2;RXRA;BCL6;MAPKAPK3
BGN	6	FXYD1;CCND3;COL1A2;COL1A1;FBLN2;S100A13
YKT6	6	TRO;RTN4;TP53I13;KIAA0040;SUV420H1;GSN
BCL3	6	SBNO2;GPAM;TYMP;SLC25A25;TUT1;CENPV
NCK2	6	MYH11;ATP2A2;CCND3;CLMN;THRA;FAM69B
PDF	6	STRIP1;ACADVL;RBPMS;WDSUB1;IGFBP3;DUT
ANGPT1	6	RXRA;PEX19;FAM69B;C7orf41;COL5A1;CENPV
PCOLCE2	6	SPTAN1;PXN;C1QTNF3;UGP2;PQLC1;GSN
SLC24A3	6	MFI2;MRAS;DDX5;WDR86;C7orf41;CABLES1
ZNF436	6	SBNO2;NLRP1;USP2;AEBP1;IFI27L2;SLC25A25
THBD	6	COL18A1;ADAMTS9;ARHGEF3;FAM120B;NR4A2;ITPR1
ZNF574	6	DDX17;ADNP;VCL;ERG;PXN;EPS8
ZNF248	6	DDX17;NPDC1;CSTF3;DDX5;RNF103;MCM9
DPAGT1	6	SCAMP2;TMEM165;WDR33;DDRGK1;SRSF1;GPRC5B
CDKN1A	6	SPIDR;UPP1;SOCS2;TSC22D3;CD7;SLC25A25
NCS1	6	EHBP1;PRKAG2;VCL;SMTN;SYNPO2;CENPV
DNHD1	6	ASPH;CLMN;RXRA;SREBF1;RER1;SLC35A2
RRP1B	6	ADARB1;CRTC1;DDX5;PMM1;FBXW5;SPTBN1
SETD1B	6	PDLIM2;EHBP1;LYNX1;MARK1;FBXO32;MOB2
GABRE	6	FXYD1;USP2;CTSF;WDR86;MAPKAPK3;CCND3
FMOD	6	IL17D;PDLIM2;MAN1B1;HRASLS5;PCTP;KIAA0040
IGF2	6	MPZ;COL1A1;MTUS1;COL1A2;SYNPO2;SEPT1
ANK2	6	CCDC39;DIAPH2;USP2;TMEM63B;FBLN2;SGCE
CASQ2	6	PDLIM7;LYNX1;COL4A5;MOB2;ATP2B4;PPP1R14A
ASPN	6	DPYSL3;C1QTNF3;COL1A2;MARK1;COL1A1;MSR1
PGAP3	6	CTDSPL;SOS1;RAB30;BNC2;ZNF84;DPM2
UBL4A	6	SOCS2;THRA;HSPA12B;SCHIP1;ATP6V0A1;HMG20B
TSPYL4	6	HECTD2;KCTD3;PHF21A;RBM26;ZNF800;SEMA6A
IFI16	6	SBNO2;MAP3K8;CD47;TXLNA;FLNB;MYL6B
EMILIN1	6	SLC44A1;PCED1A;SPTAN1;EHBP1;TNC;GSN
MRC2	6	ISLR;COL14A1;IFI27L2;COL1A1;PCOLCE;LSP1
SUV420H2	6	PHF15;PARP16;CLMN;YARS;DDRGK1;CPSF6
CD86	6	CD72;HDAC9;DNASE1L1;VSIG4;CDK16;PDE5A
PCDH9	6	MED16;BID;EHBP1;KIAA0040;PET112;CENPV
C1orf35	6	SEPHS2;SLC9A3R1;MBOAT2;CLK1;MXRA8;MTA2
NFKBIZ	6	EPAS1;ARID5B;SOCS2;CREB5;NCALD;THBS1
EFEMP2	6	MFGE8;HDAC9;COL1A1;PSAP;RGS3;FBXW7
NRROS	6	HDAC9;RGS3;SNED1;PRKACB;LAMB1;VPRBP
SCN4A	6	GPAM;SRSF1;TRO;TNMD;HSPB11;KIAA0040
APOD	6	FXYD1;C6orf62;CTSF;COL5A1;COL1A1;FBLN2
MAP7D1	6	DGAT1;HYI;ACSF2;CMTM3;CXCL12;DDAH1
TBX15	6	PHF15;RASSF4;ABCA6;MBOAT2;COL1A1;SCN4B
PCYT2	6	SPHK2;GLYCTK;PC;ARHGAP6;BIN1;YBX2
ZNF792	6	COASY;IPO11;ADAMTS9;RAPGEF5;TUT1;CNRIP1
ZMYM3	6	C17orf72;HYI;TBRG4;THRA;DDRGK1;FBLN2
ACVR1	6	PPP2R1B;MYO1B;AQPEP;CABLES1;SPTBN1;CLSTN3
ACYP1	6	PCDH1;SPARC;C7orf41;PXN;MED16;GBE1
STC2	6	LRRC32;ABLIM1;KIAA0040;PET112;GEM;PPP1R14A
BAG3	6	CD2BP2;MED16;SLC3A2;C7orf41;KIAA0040;PET112
DGAT1	6	TRO;PLCD4;SREBF1;PPP1R16A;PDE8B;YBX2
PAFAH1B3	6	LAS1L;CLDN15;TFPT;PSAP;FBLN2;LSP1
MTR	6	TLN2;RXRA;FAM69B;CHL1;PATZ1;CLSTN1
APMAP	6	SGK2;PARP16;CTSA;GLYCTK;CHI3L2;SMOC1
AJUBA	6	UBTF;DMD;UAP1;AGAP1;NMT1;FBLN2
FAM213B	6	DBNDD2;PSAP;THRA;ABLIM1;PXN;S100A16
FLI1	6	CD72;LSP1;PSAP;ABLIM1;LAMB1;TXNDC5
NDST1	6	MPZL2;ISLR;UCK2;PODXL;SEPT1;SLC19A1
LTBP3	6	LTBP4;TMUB1;IPO11;RILP;GUK1;DNM2
FUOM	6	SLC20A2;CD2BP2;ASB1;MFSD10;SH3D19;AKAP8L
CORO2B	6	IL17D;PDLIM2;CCDC102B;SPTAN1;C7orf55-LUC7L2;GSN
TNFAIP1	6	SPIDR;SBNO2;BCCIP;DYRK2;BRE;ITPR1
OSGEPL1	6	BBS1;ACSF2;CDK16;CPSF6;C10orf137;CAV1
FBXL3	6	CCDC50;MTMR10;ZMAT1;AEBP1;BCL6;TXNDC5
TBXAS1	6	LGALS12;MYH14;HDAC9;CD37;AEBP1;GABRE
MPP3	6	MFGE8;TSC22D3;RCL1;PET112;CAV1;PPP1R14A
ANKRD37	6	XPO1;HSF1;SH3D19;FN3K;HES4;PDE8B
GORAB	6	COL1A1;RAI2;PRR16;QTRT1;PCOLCE;COL1A2
ARHGAP20	6	PPP2R1B;GPAM;WWP2;ECI2;AKAP12;TMEM164
NPTN	6	STARD13;MYH14;TLN2;SLC38A10;AEBP1;DTNA
ENPP2	6	TPD52;CCND3;FAM120B;RAPGEF5;MAPKAPK3;CLSTN3
ABCA8	6	FIGF;SPIDR;DIAPH2;SGCE;ABLIM1;FBLN2
AGPAT2	6	ACACA;TRO;RASIP1;MRAS;STK39;PDE8B
CLSTN1	6	RPTOR;PDLIM7;SYNGR1;SMTN;FLRT2;ABI3BP
BBS9	6	PNKD;SMG6;RNASEH2C;SMCHD1;CCDC39;FBXW5
RIMS3	6	MFGE8;SLC7A8;PRKAG2;ZSCAN9;NOL3;GSN
PLEK	6	MFGE8;FEZ1;DCLK1;CELF2;CLEC4A;HMHA1
PPDPF	6	PPP1CB;SH3BGRL3;FXYD1;SCRIB;DHX16;DNM2
KDM3A	6	ADD3;MTR;CRTC1;MVD;PDE8A;STARD5
WSCD1	6	RASGRF2;LAS1L;RAPGEF5;SCHIP1;FBLN2;ABLIM1
EPB41L1	6	TRO;C1orf213;C1QTNF7;NOL3;ARRDC2;SPTBN1
BCL2L1	6	SBNO2;DMD;MTMR10;CCND3;TYMP;SETDB2
CCDC68	6	HECTD2;SRSF7;CDH23;RAPGEF1;TXNDC5;ASAP2
IRF2BP2	6	TRO;C1orf213;KIAA0040;PML;PRKCDBP;BCAR3
TIPARP	6	ALAD;DDX39A;TSC22D3;TCEA3;PCOLCE;SUV420H1
AKAP9	6	LIPE;MPDZ;MTUS1;TNKS1BP1;DMD;FBXW5
SELPLG	6	ACAP1;MED26;RNF103;HMHA1;ABI3BP;MSR1
LDLRAD2	6	CRTC1;DDX17;SCPEP1;DDRGK1;FBLN2;VPRBP
AGL	6	RPTOR;ISLR;CSTF3;SPARC;COL6A1;FBXW5
EXOC6B	6	C1orf123;NAA25;ITGA1;RFNG;S100A13;SCML1
ZNF362	6	APMAP;TBX3;MARCH6;MCM9;UGP2;PXN
FRZB	6	MYH11;WWP2;TNMD;CDH23;FAM69B;COL5A1
C10orf128	6	APMAP;PCGF5;DGAT1;RXRA;CALML4;RGS3
HEPH	6	SLC44A1;SPTAN1;CHN1;AGPAT3;PCOLCE;S100A13
TLL1	6	SBNO2;CMIP;AURKAIP1;PRKCE;CALML4;DUSP23
BCL9L	6	EPB41L3;UBTF;CLMN;SMTN;TNKS1BP1;ARRB1
ZNF467	6	ACADVL;ZNF580;EML3;CALML4;C7orf43;SLC27A3
GFPT2	6	SLC44A1;USP2;ABLIM1;PXN;ACOT8;LSP1
LDB2	6	SRSF7;RNASEH2C;TPP2;CRYAB;ICAM2;ABLIM3
FBXW7	6	NFIA;IPO11;BID;COL5A1;CENPV;DDAH1
FXYD1	6	LARP6;CALM1;HYI;CTSF;SCPEP1;FBLN2
C1QTNF4	6	SDF4;MTCH2;WRNIP1;IGFBP3;SLC27A3;SEC61A2
PCED1A	6	RBM26;RNASEH2C;VWA9;HDAC9;NAV1;TXNDC5
FAM160A2	6	MDK;UBE3B;CCND3;MTR;FBLN2;NGLY1
PIK3R1	6	SMG6;IPO11;PKIG;CEP89;KIAA0040;MAPKAPK3
TICAM1	6	VDR;LRRC32;KIAA0040;TUT1;CENPV;TSC22D3
KCTD15	6	SPTAN1;UNC119;SLC2A4RG;TNC;ARHGAP24;ABI3BP
DPYS	6	SPTAN1;CD47;CELF2;ATRN;FBLN2;BICD2
FCHO2	6	EPB41L2;B3GNT2;NDFIP2;SYNJ1;CFL2;ACADM
UQCRQ	6	RPTOR;DIAPH1;PSMB10;DOCK2;RXRA;GYG2
RHOB	6	SAT1;FAM160A2;NPTN;CCND3;RCL1;ARRDC2
ADAM33	6	SPON2;PMP22;CCDC39;SYNGR1;LSP1;GPT
CRYAB	6	LIPE;C1QTNF7;SLC1A5;PLIN1;LDHB;CLSTN3
IFITM1	6	RPTOR;PLS3;CMIP;F8;MRPL1;DUSP23
GPX3	6	EPB41L2;FXYD1;CTSF;PTGER3;COL1A1;PCOLCE
CPQ	6	DCN;LARP6;FXYD1;ECM1;JMJD1C;CXCL12
PLAGL1	6	DGAT2;CABIN1;ACSL1;RGS3;BCL6;TXNDC5
MYL6	6	C19orf66;STAT6;RASGRF2;DIXDC1;ATP2B4;ATXN7L1
GAS2L2	6	CCND3;RXRA;PPARG;PCTP;KIAA0040;TBC1D16
MYH9	6	LRRC32;VCL;SULF2;RBM26;PXN;PPP1R14A
SMG9	6	CALM1;CD47;PSAP;CYLD;SCG5;UGP2
SBNO2	6	SPIDR;LAMA4;SLC39A14;CTSA;SLC25A25;CENPV
ZNF644	6	HSF1;IPO11;ADAMTSL4;LDLRAD2;IFRD1;TUT1
UPP1	6	NFATC1;SAP18;DIAPH2;ADAMTS2;CD44;MED16
ATAT1	6	HDAC9;PCDH1;RBM26;LAMB1;MTERFD3;MCM9
CMIP	6	RPTOR;SBNO2;ATP2A2;ADAMTS9;VCL;DUSP23
SLC25A25	6	DDX17;UAP1;SPIDR;PNP;NCALD;THBS1
ATP5E	6	NEK6;NPTN;OXA1L;ARL6IP6;DNMT1;EPS8
CSTA	6	FXYD1;ADAMTS2;CDH23;CABLES1;HSD17B4;ZNF467
FBXL7	6	IL17D;CCND3;AGAP1;DYRK2;ICAM2;CENPV
CORO1C	6	CCDC50;CCDC51;NTRK2;DTNA;DDAH1;HAPLN3
TGFB1I1	6	IPO11;USP2;AEBP1;IFI27L2;SLC25A25;S100A16
IER5L	6	FHOD1;FZD6;TACC1;MED23;DYRK2;CLK4
AFAP1L2	6	RPTOR;MYH11;DMD;VCL;FAM69B;ATP2B4
CELF2	6	CSTF3;DDX47;PXN;DHX15;UBN1;GSN
EPB41L2	6	ITGA1;SGCE;ACAP1;ABLIM1;FBLN2;ALDH1A2
RBP4	6	CCDC107;UGP2;SORBS1;FAM219B;PDE8B;PDZD2
PPP1R9A	6	SGCE;VCL;TSC22D4;TRIM35;SMTN;DTNA
SUN2	6	THUMPD2;ISLR;OSGEPL1;THRA;IL17RC;GSN
DRD4	6	C18orf32;PALLD;SLC1A5;ST6GALNAC6;ATOH8;FGFR1
SH3BP4	6	DMD;F8;CCND3;KCNAB1;ICAM2;ATP2B4
ABCA5	6	PDLIM7;DNMT3A;KIAA0040;CENPV;CPSF6;ITGAE
LDHD	6	ADCY5;MKNK2;CRYAB;C3orf55;SREBF1;C14orf180
NTM	6	PLEKHG5;DGAT1;C1QTNF3;SELENBP1;PCOLCE;MSR1
ORAI3	6	RECK;ANXA6;DCLK1;CSTF3;PNPLA7;FKBP2
TRAPPC6A	6	SLC52A2;HYI;ERI2;STRA13;KIAA0040;DAPK3
IRF4	6	APMAP;CCDC39;SGCE;TLN2;ABLIM1;FBLN2
HCLS1	6	C17orf72;TSC22D3;MTUS1;AEBP1;CENPV;ARHGEF10L
RNF180	6	RPTOR;PDLIM7;SPTAN1;SGCE;PRKAG2;AEBP1
ABCD2	6	GPAM;DMPK;TRO;PEX19;KIAA0040;ZFAT
JUN	6	DDX17;MPZL2;TRO;TEX261;DIXDC1;PDE8B
FAP	6	AMPH;ISLR;MEF2C;SPARC;RGS3;PMM2
SLC15A3	6	HDAC9;LSP1;PSAP;ITGAE;RNASET2;ZNF385A
FAM43A	6	SMG6;MPZL2;ITGA1;SLC2A4RG;SCHIP1;ABLIM1
DBN1	6	CCDC51;LSP1;ICAM2;ACOT8;FBLN2;S100A13
SLC25A36	6	SAT1;UBTF;RBM26;TTC37;LAMB1;DENND1A
FPGS	6	CD2BP2;SGK2;CMC1;MKKS;PSMB4;SPTBN1
FEM1B	6	CCDC50;DYSF;PRKAG2;TF;PHLDB2;GYG2
KANSL1L	6	STIM2;OSGEPL1;ITGAE;COL5A1;ATP2B4;SPTBN1
CCR7	6	ARIH1;FXYD1;USP2;THRA;MAGI1;DUSP23
PIP5K1C	6	SRSF7;RASGRF2;TSC22D3;ARHGEF3;CD7;BICD2
DCHS1	6	NEDD9;IPO11;DIAPH2;RXRA;PET112;SLC19A1
CDC42EP5	6	RASIP1;ARRDC2;CFD;FKBP2;PPP1R14A;CAV1
NEDD9	6	SMCHD1;SLC22A23;LRRC32;ANKRD37;FOSL2;USP2
ELF4	6	CD2BP2;ZBTB16;DGAT1;SLC2A4RG;ATP11C;TXNIP
PELI1	6	BACE2;MPZL2;ADAMTS9;DDX47;LDLRAD2;TRADD
ITPR3	6	SLC22A17;MDC1;PXN;SPTAN1;CXCL12;GOLM1
IGIP	6	CALM1;TCEA2;PSAP;TMCC1;TRIB2;BCL6
TUBE1	6	MYH11;F8;RXRA;ZNF518B;CENPV;SLC12A9
SCARA5	5	DOCK2;FBLN2;LSP1;ABI3BP;SPTAN1
ANGPTL7	5	NR4A2;MPZ;TNNT2;MBP;TSC22D4
LRRC32	5	F8;SLC22A23;ANKRD37;HMCES;ITPR1
WNT11	5	SNED1;FBLN2;SGCE;HNRNPM;SPTAN1
USP36	5	SLC22A23;HSF1;CD7;ADAMTS9;CLSTN3
FAM13B	5	RPTOR;TMEM165;DCLK1;KCNMA1;RBPMS
EFNA1	5	NOTCH4;RAPGEF5;SCHIP1;IPO11;RASGRF2
URB2	5	CRTC1;MTR;TESK1;IFRD2;DDX5
ADM5	5	SBNO2;PLS3;DUSP23;CMIP;CLSTN3
TOB1	5	MOB2;NR4A2;RNASET2;TESK1;IFRD2
WNK2	5	RPTOR;MYH11;SMTN;VCL;SYNPO2
PLIN1	5	PPP1R16A;MTERFD3;PDE8B;TRO;FXYD1
ZMYND8	5	CISD3;CCND3;DIAPH2;MFGE8;QTRT1
SYNPO	5	LSP1;C7orf41;GFAP;CDH23;CLSTN3
SDC3	5	BCAR3;CENPV;KIAA0040;SUV420H1;NCBP2
PLSCR1	5	SBNO2;PLS3;DUSP23;ACOT8;SLC25A25
LUM	5	PCOLCE;C1QTNF3;ISLR;HDAC9;COL1A1
PI16	5	PCOLCE;C1QTNF3;LSP1;IFI27L2;COL1A1
ARHGAP6	5	MTUS1;TSC22D3;PET112;CCND3;CENPV
UGCG	5	SPIDR;SLC25A25;DUSP23;SOCS2;SBNO2
KCNB1	5	MTUS1;PET112;CLMN;KIAA0040;CENPV
COL4A6	5	P2RX1;MYH11;SMTN;PDLIM7;FBXO32
TMEM178A	5	CRTC1;SLC10A3;FXYD1;PET112;FBXW7
ME1	5	DGAT1;ARHGAP6;CDH23;YBX2;ARHGEF40
KDM6B	5	NR4A2;ADD3;BRE;TBRG4;SH3BP4
CD52	5	ZGLP1;CNIH3;ZNF385A;LSP1;CAPG
STC1	5	ADAMTS9;SPIDR;UPP1;AKAP12;NDRG1
SERPINE1	5	KIAA0040;ZNF385A;ANKRD37;DIAPH2;ARRDC2
ALPK3	5	CLMN;MAPKAPK3;CLSTN3;PIK3R3;REEP5
TWIST2	5	HDAC9;CDK9;BIN1;WWP2;CCDC51
CPLX1	5	FBLN2;PLS3;SEMA6A;MTA3;CLDN15
ABHD6	5	LAMB1;CCND3;TXNDC5;SRSF7;MCM9
PPAP2B	5	SGCE;PRKAG2;MAPKAPK3;IPO11;GNAI1
TMEM35	5	RPTOR;FBLN2;SMTN;KCNAB1;MYH11
TTC18	5	SLC10A3;SIX5;FXYD1;OSGEPL1;THRA
KCNMA1	5	RPTOR;SMTN;PDLIM7;ATP2B4;DTNA
RNF146	5	PCOLCE;GNAI1;PSAP;PRDM2;FBXW7
CTC-429P9.4	5	TSPYL2;C7orf41;TIMP1;PSMA4;MDH2
ALDH3A2	5	CABLES1;SPTAN1;CDKN1C;MAPKAPK3;CLSTN3
SF3A1	5	NEK6;ECI2;ARID1A;CTC-429P9.4;GSTT1
ZFHX3	5	CENPV;ABI3BP;IPO11;KIAA0040;MSR1
BZW2	5	CLMN;HEBP2;BCL6;EPC2;FXYD1
TM7SF2	5	HDAC9;SMOC1;GLYCTK;RXRA;SGK2
TTC32	5	RBM26;CPSF6;NOSTRIN;RNASEH2C;VPRBP
RGS16	5	ANXA1;SBNO2;UPP1;SLC39A14;SLC25A25
KIAA0922	5	ARHGAP6;C1orf213;PLEKHG6;KIAA0040;ARHGEF40
RIC3	5	MYH11;C7orf41;PDLIM7;MPZ;SYNPO2
FGFR1	5	LSP1;PNKD;MAPKAPK3;S100A13;C7orf49
MKLN1	5	PLXNA3;AGAP1;PNKD;INPP4B;MZF1
FURIN	5	MYL6B;SBNO2;FRYL;KRT5;FOSL2
RABGGTA	5	COG1;EPB41L2;UBTF;MALT1;MBTPS1
MPP7	5	RPTOR;MTUS1;PDLIM7;ATP2B4;DTNA
MROH7	5	RPTOR;MYH11;SMTN;PCED1A;ATP2B4
SLC1A3	5	IGFBP3;IGF1;MAPKAPK3;IGFBP7;MMP2
GLS	5	PCNX;C7orf41;WWP2;DDAH1;DIAPH2
ZNF438	5	ABI3BP;HRASLS5;PCTP;TRO;MTA3
IRS2	5	ASPH;DGAT2;TLN2;MARS;MRPS25
F13A1	5	HMHA1;CTSA;CNIH3;PLCB4;MSR1
DUSP7	5	TBX3;UBTF;PXN;MKLN1;ZNF623
HLX	5	SLC22A23;CYTH1;BNC2;ADAMTS9;FOSL2
TEAD4	5	SBNO2;SLCO4A1;ADHFE1;HAPLN3;MYO18A
TMEM102	5	S100A13;LSP1;ABLIM1;CD47;SEMA6A
SOX18	5	SLC2A4RG;LPHN2;UBTF;DMD;SEMA6A
SLC6A6	5	ICAM2;MFSD10;CXCL12;RAPGEF1;CALM1
COL14A1	5	PCOLCE;C1QTNF3;FXYD1;COL1A2;COL1A1
MAMLD1	5	CEP89;CD44;DDX5;DIAPH2;PTGER3
ZFP36	5	TUT1;SPIDR;UPP1;MPZL2;SEC24C
NFKBIA	5	KIAA0040;CENPV;SUV420H1;ARRDC2;FBXW7
DKK1	5	FBLN2;S100A13;CCDC39;CCDC51;FBXW7
MAPK4	5	MOB2;RPTOR;SMTN;ATP2B4;SYNPO2
ABAT	5	RAPGEF5;PRKAG2;IL17RC;PKP1;EHBP1
AMOTL2	5	RCL1;CENPV;LRRC14;DMD;SYNPO2
ING4	5	NR4A2;SAP30L;IL17RC;FAM219B;MTERFD3
DUSP2	5	NEDD9;CD7;BCAR3;SMCHD1;CENPV
SERPINB8	5	DGAT1;ACSF2;CXCL12;CDK16;SREBF1
MTSS1	5	COL5A1;CCDC39;S100A13;SLC7A8;MSR1
CCND1	5	SLC3A2;WDR86;MAPKAPK3;RXRA;SPTBN1
DLG4	5	PCOLCE;ISLR;THRA;S100A13;COL1A1
LRRK2	5	TPP2;CCNG2;RAB30;SUV420H1;PXN
MASP1	5	PCOLCE;IL17D;TMEM88;MED16;GSN
EGR3	5	NR4A2;POGK;BRE;ARRDC2;FAM120B
HAS1	5	SPIDR;USP2;CD7;FBLN2;SPTAN1
SPSB1	5	IL17D;SCRN2;ARHGAP6;KIAA0040;TXNIP
CHPF2	5	ITGA1;CPSF6;ITGAE;IL16;ADAMTS2
TJP2	5	SLC38A10;FLRT2;BCL6;ARIH1;HIVEP3
BACE2	5	MOB2;NR4A2;ABLIM1;LYNX1;ARRDC2
ZMYND15	5	HDAC9;SAT1;STARD5;CD72;MSR1
NR1D1	5	PER3;HYI;ADD3;ZBTB16;MARCH5
C1orf54	5	PCOLCE;RFNG;S100A13;AGPAT3;SLC7A8
TMTC2	5	F8;BACE2;ABLIM1;RXRA;RAP1GDS1
SPOCD1	5	CENPV;SGCE;PRKAG2;SORBS2;MSR1
ERRFI1	5	FHOD1;VSIG4;MXD4;ABLIM3;ARRDC2
TPPP3	5	FBLN2;LSP1;DYRK2;UGP2;ABI3BP
AFAP1	5	F8;LSP1;ANKRD37;ABLIM1;ITPR1
ZBTB40	5	TUT1;DDX17;LGI4;COL1A2;VPRBP
TMEM165	5	DDB2;NEK6;ACAA1;RNF217;EML4
BCOR	5	NR4A2;SBNO2;ADD3;TESK1;OSGEPL1
ZEB2	5	NTM;PLEKHG6;ATP2B4;PDLIM2;ACADM
G0S2	5	SLC2A4RG;COL6A1;MECP2;FXYD1;COL1A1
TAGLN	5	HDAC9;RABGAP1;AEBP1;PDLIM2;DIXDC1
TNRC6C	5	CLK1;DCLK1;MPZL2;ZNF449;ZBTB16
CCDC93	5	NFIC;MTUS1;TLN2;SH3GLB1;SLC35A2
THBS2	5	S100A13;SCN4B;PTPRB;HMG20B;FXYD1
CBL	5	SLC2A4RG;RPGR;CCDC39;PKIG;ZNF623
NAV2	5	CCDC51;S100A13;ARHGAP12;FBXW5;ITGA1
LMBR1L	5	DDX17;SELE;PRKACB;DDX5;PTGER3
TRPC1	5	WWC3;SH3D19;IFT140;PCGF5;CD2BP2
PLEKHA7	5	TPD52;DDX5;PLS3;DUSP23;AKAP12
LATS2	5	MTUS1;LRRC32;MTMR10;POSTN;SYNPO2
ALDH4A1	5	TUT1;SCRN2;TSC22D3;DDAH1;CALM1
COPZ2	5	TSC22D3;CALM1;PSAP;PCTP;PPP1R14A
EBF3	5	SPTAN1;CHN1;UCK2;SGCE;ABI3BP
PYGL	5	ARHGEF40;PLEKHG6;FAM219B;VIT;PET112
DDX17	5	SRSF1;EPC2;IGFBP7;MCM9;VPRBP
OBSL1	5	RAI2;PMP22;CALM1;SMOC1;PPP1R14A
PTPRB	5	F8;DTX1;BIRC3;RXRA;CD37
LIMS2	5	HDAC9;ISLR;TXNDC5;TSC22D3;CD37
SHFM1	5	NEK6;ECI2;CHIT1;CTC-429P9.4;GSTT1
RNF19A	5	IL17D;PEX19;DDAH1;MKNK2;MED16
DCLK1	5	ITGA1;SGCE;IPO11;AGAP1;FBLN2
GRIK5	5	MOB2;CAV1;PPP1R14A;ATP2B4;GSN
S100A10	5	YBX2;PNKD;COL14A1;ACOT8;DHX15
ARHGEF1	5	MTMR4;PMP22;MSR1;ACAD11;HCFC1R1
KLHDC10	5	TXNIP;SLC22A23;MECP2;NOSTRIN;ABLIM3
WDR43	5	FBLN2;IFT27;DDX5;IFRD2;KLHDC9
UQCC2	5	PHPT1;ZNRD1;UBTF;FKBP2;ANXA6
MYOC	5	IL17D;FBLN2;MME;WDR33;SPTAN1
SH3RF1	5	TSC22D3;SORBS2;KIAA0040;WDR33;PPP1R14A
PCBD1	5	DGAT1;BCCIP;GLYCTK;MARC1;CDC42BPA
CORIN	5	WWP2;MFSD12;ABLIM1;ZNF511;PPP1R14A
NPY1R	5	ISLR;C7orf41;SYNJ1;MRAS;PET112
SH3BGRL3	5	CTSA;YBX2;UBN1;ACOT8;PLEKHG5
VASN	5	CCDC51;S100A13;TEKT3;ACOT8;DDRGK1
SLC25A22	5	PHPT1;PNPLA2;MED16;MKL2;PTGER3
NAGLU	5	AKAP8L;USP2;IFT27;TBRG4;MAOA
PLEKHF1	5	ANO8;PPP1R14A;MAPKAPK3;KIAA0040;NELFE
AUTS2	5	HDAC9;LSP1;C5orf58;ZNF385A;ACKR3
LZTS2	5	IL17D;MTM1;PXN;DDX47;RECK
HRC	5	MTUS1;EIF2S1;VCL;NOL3;ABI3BP
FOXO1	5	KIAA0040;PRKAG2;SLC7A8;KRT5;FOSL2
YWHAG	5	CCDC50;SPTAN1;GPAM;KIAA0040;UGP2
LCAT	5	FHOD1;CD47;DUSP23;SRSF1;PLS3
FAM168A	5	NOTCH4;RAPGEF5;S100A13;IPO11;THRA
HOXB7	5	SLC44A1;TLN2;ABLIM1;PSAP;MYH14
HSDL2	5	MKNK2;CREB5;MARC1;PPP2R1B;PTGER3
AGAP1	5	ICAM2;PSMB4;CBLL1;DDX47;DHX15
FAM107A	5	MTUS1;TSC22D3;RXRA;WDR33;CENPV
GIGYF1	5	CLK1;FAM98A;ZFAT;DMPK;PET112
C20orf27	5	SH3D19;TBC1D16;SREBF1;CRYAB;FXYD1
TMEM252	5	HDAC9;PC;SMTN;DGAT2;ZNF385A
BMP4	5	IL17D;TNMD;RND3;PCTP;CALM1
HPD	5	CCND3;THBS4;TBC1D16;ABCB6;GYG2
CADPS2	5	SETX;LSP1;PSAP;ICAM2;SLC35A2
KAT6B	5	WDR33;DCLK1;TXLNA;RASGRF2;SLCO4A1
LAMA3	5	ICAM2;PSMB4;ASPH;RXRA;RAPGEF1
KIAA1462	5	DBNDD2;TLN2;USP2;ABLIM1;THRA
ACOT7	5	MKNK2;MAP3K8;PNKD;JMJD7;RASGRF2
C3orf35	5	ALS2;PSMF1;TMEM165;SDC2;QTRT1
HOXB6	5	UNC119;ITPR1;ADAMTS9;ZFP62;SOCS2
CSF1	5	PMM2;SPTAN1;VCL;RNF103;ABI3BP
PDE3A	5	MOB2;AEBP1;MMP19;PDLIM2;CLSTN3
FBF1	5	DDX41;HYI;PEX19;TANK;QDPR
RAMP3	5	TPD52;CREB5;DUSP23;SLCO4A1;CLDN15
GBE1	5	NR4A2;PNKD;HAPLN3;DIAPH2;PSMB10
LYRM9	5	C1QTNF3;DAPK3;COQ9;KIAA1217;SMAP1
PPP1CB	5	TSC22D3;AEBP1;DIAPH2;DMPK;PET112
TANC1	5	MKNK2;ARID4B;SLC12A9;PTK2B;NAA25
AAAS	5	COX19;THRA;OSGEPL1;ACAP1;FXYD1
SPRED2	5	CCND3;USP2;COG7;SMTN;SYNPO2
HAS2	5	F8;C1QTNF3;USP2;LSP1;ZNF423
RAC3	5	TP53I13;FXYD1;SRSF7;NELFCD;ICAM2
NOTCH3	5	RPTOR;PSAP;VCL;HNRNPM;MYH11
ESAM	5	DGAT1;SLC7A6;SCARB1;LSP1;CAV1
BCL6B	5	F8;C17orf72;WWP2;DKK3;MLPH
ZNF385D	5	CENPV;LMF1;NOSTRIN;MARK1;MRPL1
MBNL3	5	FXYD1;FBLN2;EHBP1;CENPV;CAV1
PLCD1	5	TP53I13;FXYD1;WWP2;KIAA0040;ADAMTS2
CD53	5	RECK;PTK2B;STARD13;TLN2;MARC1
ARL13B	5	FBLN2;DNMT3A;COL1A2;INF2;CFI
SNAI1	5	EGFL7;RPGR;RASIP1;TESK1;FAM120B
SLC38A1	5	ABI3BP;PRKAG2;ATP2B4;PDLIM7;DTNA
AKT3	5	ITGA1;ACSL1;ANKS6;FAM50A;MBTPS1
FUCA1	5	HDAC9;STARD13;TBC1D10B;CEP290;CD37
CD99L2	5	PEX19;PPARG;MAP3K8;CTSF;SBNO2
MCL1	5	SAT1;UPP1;ADAMTS9;ARID5B;MMP19
TMCC3	5	C19orf66;SRSF7;CYTH4;RASGRF2;CD37
STK38L	5	NRP2;CYTH1;VCL;NSFL1C;DIAPH2
GPSM3	5	ADORA1;SEPT6;TLN2;ACAP1;PRKACB
DUSP23	5	PLS3;SBNO2;YWHAH;TLN2;FLNB
PDIA5	5	FLNB;SCHIP1;KIAA0040;ARRDC2;MYBBP1A
SAT1	5	SLC3A2;KIAA0040;DMPK;NOL3;DDX39A
SH3GLB2	5	SLC2A4RG;MED23;UBTF;COL14A1;DDX47
IGFBP5	5	FBLN2;ZNF608;TMEM100;MAPKAPK3;MMP19
SLC25A30	5	F8;WDR86;ITGA6;ARRDC2;GDPD5
ORMDL3	5	CCDC50;PEX19;BCL6;MAPKAPK3;TXNDC5
CSF1R	5	HMHA1;TNFSF13;ADORA3;FEZ1;RNF103
ABCC5	5	DCXR;BIN1;CBY1;DDX47;PXN
SSTR2	5	NR4A2;DDX17;TANK;IFRD2;HDAC9
PRR7	5	IGFBP3;MRPS34;EML3;MXRA8;CST3
C1QB	5	DCLK1;PSAP;TBXAS1;VIT;ALMS1
LFNG	5	DGAT1;LPHN2;LIN7A;HDAC9;DDRGK1
BSG	5	MME;RAPGEF5;ASPH;TRIB2;RECK
FBXL19	5	NOTCH4;TSC22D2;THRA;KHDRBS3;ANXA6
TRAF3	5	CENPV;SUPT6H;MRAS;RNF103;RXRA
JMJD1C	5	LDLRAD2;SCML1;ADAMTS9;FBXW5;RASGRF2
ZNF629	5	DBNDD2;PSAP;C7orf41;VCL;DTNA
SCFD2	5	TSEN34;IVNS1ABP;TXLNA;ABLIM3;ITGA1
C9orf40	5	SPIDR;BRE;PRKCE;UPP1;ADAMTS9
HSD17B8	5	PEX19;TCEA2;FXYD1;KCNIP3;HYI
LBH	5	RPTOR;MYH11;CCND3;ATAD2B;SYNPO2
SLC4A2	5	PHLDB2;PRKAG2;ATP5E;EHBP1;MBTPS1
CENPV	5	SH3D19;MTUS1;CPSF4;CHAMP1;RXRA
KAT2A	5	HDAC9;OGT;PSMB4;SGK2;COL1A1
ACY1	5	CD2BP2;COASY;SRSF1;SEC11C;HTRA3
GALNT7	5	DGAT1;CXCL12;CDK16;CTSF;SREBF1
MKS1	5	HIPK3;CD2BP2;SEC24C;PPM1A;THRA
IGF1R	5	ZBTB16;CLK1;NDRG4;PC;UNC119
TMEM121	5	IL17D;ITGA1;SDR39U1;PMM2;SEMA6A
ITGA5	5	CLSTN3;TSC22D3;CALM1;MRAS;FBXW7
VASH1	5	HIPK3;CLK1;TRNAU1AP;MTCH1;THRA
STON1	5	MAPKAPK3;TMCO3;CRYAB;CELF2;PPP1R14A
RERE	5	FXYD1;TACC1;EHBP1;C14orf180;ADARB1
RNF41	5	COL6A1;HSPG2;AEBP1;IQGAP1;FBXW5
LRIG3	5	IL17D;CCDC51;PNKD;CHD6;STARD5
PMVK	5	ITGAE;COL5A1;FBXW5;MED16;MAN2B1
TGFBR2	5	HIPK3;MTUS1;FLNB;CMIP;SPTBN1
RXRA	5	DTNA;TBC1D16;CAPN2;TRIM35;CLSTN3
C15orf59	5	COPZ1;C7orf41;ABCB6;NTRK2;HTRA3
ECM1	5	PARP16;SYNGR1;LSP1;SGCE;ABI3BP
GNG12	5	RTN4;SPTAN1;TYMP;TK2;CREBZF
R3HDM4	5	MFSD10;NELFE;COL1A2;CPB1;ADARB1
SMAD3	5	FBLN2;S100A13;WWP2;SRSF7;GSN
NLE1	5	LNPEP;SLC3A2;TMEM248;SGK2;GYG2
CCR5	5	FBXO32;CNIH3;ZNF385A;IL16;MSR1
CAV1	5	KIAA0040;NTRK2;PNKD;C1QTNF7;DIAPH2
CDC42EP3	5	GLI3;TBRG4;DNM3;ARRDC2;FOSL2
TIA1	5	COL18A1;LSP1;POLR2H;ITGA6;LNX1
TK2	5	TUT1;SLC38A10;CENPV;KIAA0040;DDX17
CHTF18	5	CLK1;PAM16;SRF;MTCH1;DHRS1
HMGB2	5	PATZ1;GPAM;ALS2;GOLGB1;SRSF1
PTPN6	5	CCDC50;LGALS12;FBLN2;TMEM165;PLIN1
PREPL	5	FAM69B;THRA;ITGAE;SLC35A2;CPSF6
CTSZ	5	DNASE1L1;SMOC1;CYBA;LARP6;YBX2
HEXB	5	PATZ1;CNIH3;CYBA;SMOC1;TPR
EGFL7	5	VWA5A;LRRC32;ITPR1;KIAA1462;SEMA6A
GPR146	5	F8;PSAP;SCHIP1;CMIP;ABLIM1
MBD3	5	SLC2A4RG;ECI2;MARK1;GSTT1;THRA
SPRY1	5	SLC22A23;NOSTRIN;VPS13A;RASSF4;ADAMTS9
SORBS3	5	IGFBP3;INO80E;PTPRS;TESK1;CAPZB
PLXND1	5	MTUS1;SLC39A10;RER1;PSAP;THRA
KIAA1199	5	FBLN2;S100A13;CYP4X1;MTA3;SPTAN1
EFS	5	TLN2;TMEM100;PPP6C;ICAM2;PLIN1
AMOTL1	5	TXNIP;SYNE1;ARHGAP6;KIAA0040;TRO
RARG	5	COL6A1;HPS4;ARHGAP6;TMEM100;ACOT8
RFX3	5	ANXA1;SLC2A4RG;FBXW5;RCOR3;RPGR
NR2F2	5	DGAT1;PHF15;PDLIM2;LTBP1;RGS3
DOLK	5	DDX5;TBX3;PSAP;ITGAE;DDX17
MCTP1	5	ABLIM1;MTUS1;CLDN15;TLN2;CENPV
CAP2	5	SMTN;ARHGEF40;ATP2B4;RIT1;ZBTB47
STK36	5	DDX5;PSAP;KIAA1462;MARK1;RHOBTB1
SLC41A1	5	FOSL2;MTMR10;BCL6;TXLNA;SLC25A25
ETNK1	5	RPTOR;DDX17;TPM2;WDR33;PLSCR1
STAC	5	RAPGEF5;SGCE;PIK3R3;PEMT;MAPKAPK3
SLC23A3	5	TM6SF1;TMEM126B;CLDND1;CELF2;IFI27L2
ARRDC2	5	F8;PML;USP2;ANKRD37;AEBP1
KLF6	5	SBNO2;MAP3K8;RCL1;SLC7A8;MDK
PTPRN2	5	DBNDD2;TBX3;CMIP;TMCC1;PSMB10
CYBRD1	5	IL17D;SYNGR1;TMEM237;IFI27L2;SPTAN1
TRABD2A	5	NR4A2;CLSTN3;CALM1;ARRDC2;MSR1
HADH	5	IQGAP1;CCND3;C7orf41;RXRA;MARC1
OMG	5	SPTAN1;AMPH;SGCE;ABI3BP;GSN
SLC3A2	5	SLC2A4RG;CLTCL1;FAM160A2;SIGLEC1;BSCL2
SCML1	5	C3orf55;MKKS;TLN2;WHSC1L1;MYH11
ARNT2	5	AGAP1;SMTN;IPO11;KIAA1199;IP6K2
RFTN1	5	SLC38A10;PLEKHG5;EHBP1;RTKN;PLCD1
WASF3	5	IL17D;CCDC50;IGF1;KIAA0040;NOL3
TRIM33	5	SH3D19;SENP3;STARD9;HEXB;DCLK1
GATSL3	5	MTUS1;TSC22D3;ERG;KRT5;KIAA0040
CLDN5	5	SPIDR;BACE2;TP53INP2;ITPR1;FOSL2
MAN1B1	5	ZFAND3;NID1;GPC3;COL1A2;FBLN2
SEC31B	5	TPK1;PCDH1;LRP1;TP53BP1;PXN
ARHGAP32	5	SPATA13;PTTG1IP;IL17RE;HDAC9;PC
PRPF40B	5	DDB2;MAP3K11;AMIGO2;RBM26;MMP28
B3GNT5	5	NR4A2;ADAMTS9;BRE;AKAP12;YBX2
MT3	4	LHPP;MBP;TSC22D4;ITGB4
NNMT	4	SPIDR;DUSP23;CENPV;BCL6
CKM	4	TCAP;TNNI2;TNNC2;PDLIM3
MYC	4	SPIDR;SLC25A25;SBNO2;THBS1
PKD2	4	PC;PRKAG2;SREBF1;YBX2
HSD11B1	4	PCGF5;CRYAB;PEMT;FXYD1
FOS	4	ANXA1;SAT1;CREB5;THBS1
BRPF3	4	CLPB;BCL6;MAPKAPK3;RGS3
CREB3L1	4	DTNA;IGF1;MAPKAPK3;COL1A1
CFP	4	FBLN2;OSGEPL1;ARHGEF10L;MARK2
AATK	4	LHPP;TNNT2;MBP;TSC22D4
NRARP	4	LAMB1;RPGR;NR4A2;STX4
PRDM11	4	LGI4;MOGS;CALM1;VPRBP
PLP1	4	MPZ;MBP;TSC22D4;NCAM1
ANTXR2	4	MAPKAPK3;BCL6;TLN2;DTNA
EGR2	4	NR4A2;PNP;PTPRE;CLEC2B
DUSP6	4	ABI3BP;ITPR1;AKAP12;IL1RL1
CAPN7	4	MTUS1;SLC39A10;SREBF1;MBTPS1
FAM19A5	4	DOCK2;SPTAN1;MBP;TSC22D4
AQP9	4	SPATA13;LSP1;STX4;MSR1
ALDH2	4	SLC44A1;FXYD1;C12orf39;FBLN2
PAK1IP1	4	FBLN2;YARS;IFRD2;MFGE8
CREM	4	HSF1;MAPKAPK3;BRE;ADAMTS9
CC2D1A	4	COL6A1;UBTF;FBXW5;ABLIM3
SCG2	4	SPTAN1;FBLN2;ABI3BP;GSN
STXBP6	4	ITGA1;S100A13;CELF2;SPTAN1
CBX7	4	SBNO2;PNKD;PKIG;CSF3
PFKFB1	4	SMOC1;YBX2;TRO;THRA
FNDC1	4	IL17D;C1QTNF3;MSR1;COL1A1
DLL4	4	C1orf52;CXCL12;MFGE8;ARRDC2
NCALD	4	RPTOR;EHBP1;VCL;ATP2B4
DCUN1D4	4	PTS;SRSF7;PSAP;FBXW7
MYRIP	4	CCND3;ENPP2;MMP28;S100A16
EPB41L4B	4	CCND3;BCL6;TXNDC5;RGS3
FAT1	4	HDAC9;SHOX2;C1QTNF7;ACOT8
B4GALT5	4	SBNO2;REEP5;TCEA2;SLC25A25
ATP10A	4	CDKN1C;IGF1;GLYCTK;RGS3
TF	4	DGAT1;ACACA;ZNF385A;GLYCTK
LMX1A	4	FBLN2;S100A13;SGCE;LSP1
DNAH1	4	HIPK3;GLYCTK;PPM1A;FXYD1
WDFY1	4	RECK;SPIDR;TYMP;SBNO2
ADD3	4	IL17RE;LSP1;ABLIM1;TSC22D4
CADM2	4	LHPP;MPZ;MBP;IFI27L2
CENPW	4	MYH11;SMTN;VCL;SYNPO2
B4GALNT1	4	MOB2;MPZ;MBP;TSC22D4
NAP1L5	4	ADAMTS9;PDIA5;HES4;MCM9
UCP2	4	MOB2;CDH23;MPZ;KIAA0040
ANKRD50	4	DTNA;PCED1A;TPM2;ANKRD13A
CTSF	4	AQPEP;SMOC1;XPR1;NFIA
DNMT1	4	NPTN;COL14A1;USP40;ACOT8
ARHGEF12	4	EPB41L2;TXNDC5;ICAM2;TEX10
MED30	4	ZNF800;ISLR;EPC2;SIDT2
STIM1	4	CCND3;CENPV;CNIH3;RAI2
IL33	4	SBNO2;DUSP23;CMIP;CLDN15
UBA7	4	DDX5;ZNF800;DIAPH2;NFATC1
PPAN	4	TUT1;DDX5;RPRD2;IPO11
CHST7	4	IL17D;ABI3BP;SPARC;BCL6
NAB2	4	FHOD1;CD47;SMG6;SPON2
EDN1	4	NR4A2;CCND3;FAM219B;ARRDC2
LPAR2	4	TCF25;DCLK1;DIAPH2;CD2BP2
ELOVL1	4	DGAT1;PMP22;CXCL12;ARID5B
TKT	4	UBP1;FAM219B;RASGRF2;ARHGEF40
PLXNB2	4	IL17RE;C7orf41;CDH23;ANGPTL2
DACT1	4	IL17D;SBNO2;TYMP;SLC25A25
RECK	4	SYNGR1;SPTAN1;SGCE;MSR1
RAB3IL1	4	SPTAN1;LSP1;SGCE;ARHGEF3
ABLIM1	4	SPTAN1;LMBRD1;CCDC39;CLSTN3
TENC1	4	LAMA4;TSC22D3;CXCL12;AKAP8
MGP	4	IL17D;FBLN2;FAM122B;CALM1
AXIN2	4	TNKS1BP1;SLC39A10;CLMN;THRA
PCDHGC3	4	SYNGR1;SGCE;PDLIM7;GSN
EED	4	HECTD2;HSPB11;WNK1;MCM9
ANKMY2	4	CENPV;TSC22D3;CCND3;WDR33
CLEC14A	4	TBX3;SORBS2;DMD;CLSTN1
JUNB	4	NR4A2;SPIDR;UPP1;SAT1
TNNC1	4	TCAP;MBP;TSC22D4;NCAM1
IRF2BP1	4	MXRA8;TSC22D2;UBTF;RILP
IGSF8	4	SRSF7;MAPKAPK3;ICAM2;RASGRF2
MSC	4	RER1;PRKAG2;CRYAB;CLSTN3
TTC8	4	CABLES1;C1orf213;NTM;SPTBN1
ALDH1A2	4	SMOC1;PTPRB;RXRA;CALML4
HOOK2	4	SREBF1;PDE8B;TRO;FXYD1
SPP1	4	LSP1;CHIT1;ZNF385A;MSR1
TLR4	4	PCNX;IFITM10;ME1;KIAA0040
ANXA1	4	PNKD;PXN;ACOT8;YBX2
SH2B2	4	ZNF518B;PLS3;GAREM;SBNO2
HSPG2	4	PCOLCE;TSC22D3;COL1A2;PPP1R14A
GPD1	4	GLYCTK;PLEKHG6;DYNC1LI2;PPP1R16A
THOC6	4	CYP26B1;SEPHS2;HEXB;SENP3
MAPK13	4	TMEM88;CNIH3;MMP19;MSR1
ABCC1	4	IL17D;SPTAN1;GSN;MSR1
ITGA8	4	P2RX1;COL4A5;PDLIM7;FBXO32
PDE5A	4	CDKN2B;RABGAP1;STARD13;FBXO32
RASSF3	4	SPTAN1;ZNF385A;SGCE;SLC7A8
SNX21	4	WWP2;DDAH1;UGP2;MED16
LPAR1	4	IL17D;SPTAN1;ABLIM1;RECK
TCEA3	4	LAMB1;HDAC9;FAIM3;FXYD1
RRP12	4	FBLN2;APMAP;HNRNPM;THRA
MLLT1	4	SMTN;VCL;ATP2B4;DTNA
TSPAN18	4	PLS3;CLSTN1;SEC24C;RAPGEF1
TBC1D14	4	CEP89;CTSA;PNKD;DIAPH2
GPC3	4	TNMD;SGCE;CXCL12;ECM1
ARHGEF2	4	FHOD1;PKIG;WWP2;ABLIM3
GPT	4	STK39;C7orf49;CRYAB;TRO
TRIB1	4	ANXA1;UPP1;PICK1;MID1IP1
WDR27	4	LAMB1;DGAT1;RBM26;COL1A1
BTG2	4	SAT1;COG1;NEDD9;THBS1
C19orf24	4	MKNK2;SYNJ1;STX4;CABIN1
IFRD2	4	CTC-429P9.4;SMTN;UBTF;SRSF1
LMCD1	4	MTUS1;CCND3;EPB41L4B;PPP1R14A
RASAL2	4	CCND3;MDFI;TSC22D3;RXRA
MARC1	4	MAPKAPK3;SCHIP1;TRO;RGS3
CXCL14	4	TMEM88;SGCE;PRKAG2;CENPV
EMX2	4	LAMB1;HYI;COL1A2;RPGR
APBB1IP	4	ACAA1;COL5A1;TRO;UGP2
KLHL25	4	PEX19;STK39;LAMB1;DDX5
TUSC3	4	MTUS1;CAV1;IPO11;S100A16
GSN	4	SCPEP1;FBLN2;CTSF;CAV1
CHRDL1	4	CALM1;PLEKHG6;IFI27L2;FBXW7
TPST1	4	C1QTNF3;DNM2;HSPA2;ADAMTS2
NRXN3	4	LHPP;MPZ;MBP;TSC22D4
CALM1	4	PLS3;ACSF2;PPP6C;C21orf59
TBC1D2	4	LSP1;ZNF385A;PSAP;CLSTN1
ARL4D	4	MSR1;PRKAG2;IPO11;MED26
HSD17B6	4	SYNGR1;ABI3BP;VCL;TNC
YBX2	4	NFIA;CXCL12;PDE8B;TRO
THOC1	4	DGAT1;MTUS1;SMTN;S100A16
GLYAT	4	SELENBP1;RTN4;C1orf213;PET112
GIPC2	4	TBX3;SLC39A10;PSAP;RGS3
HIPK3	4	RECK;RNF217;NBAS;SBNO2
DAPK3	4	SBNO2;MAP3K8;TMEM259;DIXDC1
HHEX	4	SAMD4A;FHOD1;DHX15;UNC119
MYOCD	4	SMTN;PDLIM7;PKIG;DTNA
CXCL12	4	SORBS1;PXN;ACOT8;HLA-DMA
BAALC	4	KRT5;DDAH1;KIAA0040;IPO11
MESDC1	4	TWIST1;MIDN;EIF4E3;COL6A1
ITPKC	4	LAMB1;SPIDR;F8;ARRDC2
ZFAT	4	EPB41L2;RXRA;PEMT;BCL6
SLC38A11	4	ABI3BP;CCND3;MRAS;CENPV
VAMP8	4	RGS14;CDK16;ICAM2;WDR33
CAMK2G	4	MOB2;SPTAN1;EHBP1;CABIN1
ACKR3	4	SPTAN1;USP2;CELF2;SLC44A1
PSD3	4	SPTAN1;LSP1;MMP19;MSR1
SELP	4	STAT6;PRKCE;RASGRF2;SBNO2
PALMD	4	TNMD;DDAH1;PC;MSR1
CKAP4	4	RCAN2;DCLK1;PDLIM7;PPP1R14A
SEMA3C	4	C1QTNF3;ACOT8;PXN;UGP2
VSIG4	4	PC;PSAP;MMP2;EMILIN1
ARRDC4	4	AQPEP;MPP1;KIAA0408;LARP6
LRP4	4	IL17D;SPTAN1;ABI3BP;SLC44A1
IL10RA	4	HDAC9;THEMIS2;ARHGEF10L;CD37
CYB5A	4	SREBF1;CRYAB;MARC1;RGS3
COL4A1	4	MTUS1;PMP22;MFGE8;CAV1
MAGEF1	4	FBLN2;SLC44A1;ABI3BP;SPTAN1
MFSD8	4	RBM26;UBTF;NARS;IFT27
CALCOCO1	4	PSAP;SRSF1;AEBP1;PXN
NCKAP1L	4	DGAT1;CBLB;ISLR;HDAC9
ITK	4	TUBA4A;CYBA;SEPT1;ACAP1
FAM47E-STBD1	4	SLC2A4RG;GLYCTK;SPTBN1;BTK
PCSK1N	4	P2RX1;MYH11;SMTN;FBLN7
SAMD14	4	SPTAN1;ATP2B4;TNC;ABI3BP
ZEB1	4	ABI3BP;CNIH3;SLC39A10;MSR1
LUC7L	4	PCOLCE;S100A16;CTC-429P9.4;CALM1
HSD17B11	4	MTUS1;CCND3;AEBP1;TXNDC5
CTNNBIP1	4	CAV1;IPO11;TMCC1;S100A16
PON2	4	CENPV;SLC35C1;WWP2;FBXW7
RAB20	4	NR4A2;MMP19;CD72;MSR1
KCTD13	4	PPM1G;FAM69B;STIM2;SH3D19
GPR133	4	PMM2;FBLN2;CELF2;MID1IP1
PLA2G4A	4	COL4A6;SMTN;PPP1R14A;NELFE
DGKG	4	MOB2;AEBP1;ATP2B4;RIN3
MCM5	4	CRTC1;MAP3K8;CABIN1;S100A16
TCF7L2	4	GPD1L;TIMMDC1;MAPKAPK3;CLSTN3
PDP1	4	FRYL;SIRT7;BCL3;CRAMP1L
NHLRC3	4	HIPK3;PSAP;EPC2;FXYD1
UXS1	4	DDX17;DCXR;TESK1;TEX10
KRT13	4	TAX1BP1;CPA1;CPB1;TIMP1
FGFRL1	4	SELENBP1;REEP5;PEX19;ASPH
PHC2	4	AGRN;SAP30L;CCND3;FAM219B
SHROOM3	4	SYNGR1;RPTOR;VCL;RIN3
MDM1	4	CAPZB;EHBP1;FBXO32;DTNA
TMEM87B	4	RBM26;FBLN2;PARP16;PLSCR1
DSC2	4	RAPGEF5;PLEKHG6;PSAP;SLCO2A1
RUNX2	4	FBLN2;BRE;RAP2C;COL1A1
DNAJC27	4	SH3D19;SPIDR;TYMP;CD2BP2
CA2	4	NR4A2;MAPKAPK3;ADAMTS9;RASGRF2
SPNS2	4	SBNO2;DUSP23;TGFBI;CLDN15
CLEC3B	4	PEX19;TSC22D3;DDAH1;MED16
CD163	4	MMP2;WDR54;TLN2;MRAS
ALCAM	4	CYP26B1;LSP1;EPB41L2;SMOC1
KMT2E	4	CCDC50;ACSF2;LIPE;CD47
EFHD2	4	LAMB1;DNASE1L1;CDK16;TBRG4
MAOB	4	IL17D;HEMK1;MAPKAPK3;ATP2B4
FOXF1	4	LAMB1;NR4A2;BRE;RPGR
DOK2	4	HDAC9;PRKACB;CLEC4A;DDRGK1
SUFU	4	PDK2;SORBS2;UBTF;SYNPO2
HMGA2	4	RAI2;PNKD;CRYAB;PSMB10
MTF2	4	DGAT1;CD2BP2;UBTF;SH3D19
PPARGC1B	4	DGAT1;AGRN;PHF15;CLSTN3
ZNF358	4	FBLN2;LMNA;PPP1R35;SPTBN1
INPP5D	4	F8;USP2;CCND3;ARRDC2
HTATIP2	4	PEX19;DECR1;C14orf180;GYG2
CD4	4	ABI3BP;CFI;RNF103;MSR1
C16orf86	4	DDB2;AKAP8L;HDAC7;CLDN15
PIM1	4	USP2;C1orf213;ZBTB16;SLC25A25
FRAT2	4	RALGAPB;VWA5A;TXLNA;DDX5
COL4A3BP	4	PCOLCE;CAPN7;DYRK2;CAV1
ZNF581	4	FBLN2;OSGEPL1;HNRNPM;SNRNP25
DDIT4	4	VWA5A;ANKRD37;DIAPH2;ARRDC2
RAMP1	4	SPTAN1;SMTN;FBXO32;MYH11
C7orf43	4	SORBS1;AKAP8L;PHLDB2;KAZN
C5orf51	4	SREBF1;TBRG4;PRKAR1A;ARRDC2
LONRF1	4	LAMB1;UNC119;CXCL12;BCL6
MYO7B	4	CXCL12;SRSF1;HNRNPM;RAPGEF1
ZNF22	4	PHF15;DDX5;FBXO32;DDRGK1
DMD	4	CIRBP;C7orf41;PDE8B;PET112
MAP3K8	4	BACE2;CRIM1;NOSTRIN;FRY
THRSP	4	ARHGEF40;C1orf213;SGK2;AP006621.5
TNFAIP3	4	HSF1;ADAMTS9;RXRA;SLC7A8
FRMD4A	4	PRKAG2;VCL;EHBP1;CLSTN3
TIMP1	4	HELQ;S100A13;PCED1A;RAB30
LIPA	4	LSP1;CAPG;ZNF385A;CD72
PHOSPHO2	4	SLC39A10;SH3GLB1;SPTBN1;MARS
S100A3	4	RFNG;PNKD;CABIN1;MDK
KLHDC1	4	SH3D19;PIH1D1;IL1R1;RGS3
MAMDC2	4	CAB39L;SPTAN1;KLC4;KIAA1199
ST6GALNAC6	4	CCDC50;HDAC9;PEX19;RXRA
ASAP3	4	SYNGR1;ECI2;AEBP1;SMAD3
RHOBTB2	4	ABI3BP;FAM122B;SMG6;IPO11
ROBO4	4	CYTH1;RPGR;CAV1;S100A16
TSPAN12	4	HDAC9;LPHN2;PLEKHG6;SELP
COX7A1	4	IL17RE;AP006621.5;NCBP2;MED16
C7orf41	4	MARCH6;APMAP;FXYD1;CLSTN3
ASPRV1	4	ASB1;TRIT1;HSPBAP1;EHBP1
DNMBP	4	SPTAN1;TARBP2;ABI3BP;STARD5
FAM134B	4	DGAT1;SCRIB;TMEM184B;HDAC9
DCAF15	4	SLC2A4RG;FIGF;ACSF2;CTSF
TESK1	4	ITPR1;SREBF1;HNRNPM;KIAA0040
ZDHHC9	4	PCOLCE;HDAC9;MYL6B;GYG2
GPRIN3	4	SPTAN1;LSP1;ITGAE;MTUS1
WSCD2	4	SPTAN1;LSP1;SGCE;TNC
BBC3	4	DDX5;AKAP12;ANGPTL2;PTGER3
ST6GALNAC3	4	F8;IPO11;IFI27L2;S100A16
LIG4	4	AKT1;ZBTB1;SLC7A8;RAB30
ATP6V0A1	4	CENPV;EPC2;FAM69B;DNM2
TRIM29	4	IL17D;SPTAN1;SMOC1;ABI3BP
MMP28	4	MTUS1;TLN2;MARC1;SPTBN1
GLT8D2	4	PCOLCE;FXYD1;C14orf180;COL1A1
DNAJA4	4	MTUS1;BCCIP;CNNM3;DDX17
WNK1	4	GPAM;DYRK2;RAPGEF1;RASGRF2
C15orf41	4	PCOLCE;SMTN;EHBP1;ADD3
MAN1A2	4	GNAI1;SH3GLB1;TRO;NEK9
ITGAV	4	PEX19;FBLN2;SYNJ1;TK2
WDR86	4	HRASLS5;REEP5;ARSA;SLC35C1
C1QC	4	ADORA3;TBXAS1;RNF103;CD37
MAMDC4	4	MKNK2;TCF25;DGAT1;HDAC9
FAM46B	4	PHF15;FBXO32;SUV420H1;KIAA0040
PYCR1	4	TCF25;PDLIM7;TESK1;COL1A1
VASP	4	DGAT1;PLS3;TMEM259;CAV1
KIT	4	IL17D;SLC18A2;STX3;KIAA1522
ZKSCAN8	4	ANXA1;TEX261;TMEM165;VPRBP
ACTA1	4	TCAP;TNNI2;TNNC2;PDLIM3
P2RX1	4	RPTOR;LYNX1;TNC;NNAT
ARHGAP18	4	CCND3;CAV1;WDR33;MSR1
MEPCE	4	DDX17;PTPRE;TEX10;TIAL1
MMP2	4	DNASE1L1;CCDC39;TLN2;MDK
DDIT3	4	SLC2A4RG;AMDHD2;TNKS1BP1;RASSF4
SLC26A6	4	EGLN2;ITPR1;IP6K2;DDX5
SMOC2	4	CNIH3;SEPT1;RAI2;SYNPO2
STARD3	4	CCND3;HEMK1;HNRNPM;WDR86
C1orf159	4	MKNK2;MAPK3;STRA13;AKAP8L
OLFM2	4	WDR86;ACACA;BCAR3;ARRDC2
MMP27	4	IL17D;FBLN2;SGCE;GSN
B9D2	4	DDX17;PSAP;WDR33;GLCE
RTN2	4	TLN2;CCND3;TXNDC5;TCF12
ZCWPW1	4	LRRC14;C6;CREM;FXYD1
SRF	4	ADNP;SLC38A10;ENTHD2;S100A16
HMG20B	4	SYNGR1;SPTAN1;AEBP1;DIAPH2
HTRA1	4	AQPEP;SCRN2;IL17RE;CCDC39
BRD8	4	MTUS1;CHD3;DMD;KIAA0040
MYL1	4	TCAP;TNNI2;TNNC2;PDLIM3
AL807752.1	4	SLC1A5;TFG;MTA2;LARP6
C3orf58	4	ITGA1;ACSL1;TXNDC5;DKK3
AMIGO2	4	MOB2;PC;PLEKHG6;PPP1R14A
TSSC1	4	HSF1;ITGA1;ADD3;TXLNA
PSME4	4	SMTN;SRSF1;ACOT8;DTNA
CCDC39	4	AEBP1;PXN;MID1IP1;THRA
GUCY1B3	4	PHF15;ITGAE;PDLIM2;RGS3
EIF4G1	4	IL17D;COL5A1;DDAH1;CALM1
OSGIN1	4	WDR86;TNKS1BP1;SGK2;GDPD5
EPHB6	4	C7orf41;DIAPH2;DMPK;RXRA
MECOM	4	USP2;YARS;ABLIM3;S100A16
TBL1X	4	IL17D;PNKD;SUV420H1;CALM1
TRIM3	4	FAM188A;FAM122B;ICAM3;SH3BGRL3
SELM	4	IL17D;SPTAN1;VCL;TNC
TEK	4	F8;DNASE1L1;PTPRB;RGS3
SNED1	4	HDAC9;MYL6B;PCED1A;ADHFE1
TMEM63A	4	LAMB1;C17orf72;PMP22;TESK1
PROCR	4	PCOLCE;FBLN2;LSP1;TRO
FXYD5	4	TXNDC5;LSP1;PTPRS;DTX1
SMAD6	4	SLC22A23;CXCL12;UBTF;EMCN
G6PD	4	CLEC10A;PPP3CA;HAS1;FXYD1
ABI3BP	4	PCOLCE;FBLN2;TRIM29;RNF41
SLC24A1	4	MFSD10;HOXB3;ANXA6;CDC42EP4
BACH1	4	SLC22A23;VWA5A;RAI2;AKAP12
TTYH3	4	ZNF385A;PSMB4;PSAP;SPTBN1
MEF2A	4	PLS3;PTGER3;SMPD1;ADAMTS2
KIF19	4	NR4A2;ITPR1;AKAP12;TSC22D4
NUMBL	4	SPTAN1;IFI27L2;ABI3BP;GSN
MLYCD	4	DDX5;VCL;PLXDC2;SEC24C
PDGFRL	4	PCOLCE;CCDC39;ABLIM1;TCEA3
NTF3	4	MOB2;HDAC9;PDLIM7;RIN3
AMN	4	LOXL1;MAPKAPK3;NTRK2;MXRA8
CLPTM1L	4	SCRN2;C7orf41;C1QTNF7;FXYD1
KCNAB2	4	LSP1;ZNF385A;RXRA;CD72
FBLN5	4	RECK;SGCE;KRT5;SLC7A8
TSPAN1	4	SBNO2;DUSP23;RPRD2;CALML4
PRNP	4	ACP5;PLD1;IL16;CCDC51
SULF2	4	F8;DUSP23;CMIP;CLSTN3
TCEAL1	4	APMAP;DTNA;AGPAT3;GYG2
CXCL9	4	ADAP1;PLXNB3;SMTN;PET112
ATP13A3	4	SMTN;DTNA;ATP2B4;MSR1
PELI3	4	EHBP1;RCL1;KRT5;CLSTN3
NUAK1	4	MYH11;TYMP;DMD;GPT2
EPM2A	4	RPTOR;SRSF7;TRIM35;DTNA
EVA1B	4	SLC44A1;PPP1R35;ATP1A1;DNM2
RBM24	4	MOB2;PDLIM7;THEMIS2;RIN3
MINA	4	ITGA1;CCND3;MYH14;FXYD1
TRIM25	4	RARA;LRRC32;ENPP2;TSC22D3
MAP4K3	4	MRC2;TPM2;RNF103;MSR1
STX12	4	RCL1;HYI;TSC22D3;DAPK3
B4GALT2	4	HDAC9;DDX5;CDH23;THRA
ACADVL	4	PRKAG2;AGPAT3;EHBP1;SYNPO2
PXN	4	SYNGR1;SPTAN1;MTA3;UBE2D1
SPEN	4	ZFAT;IFT27;SUV420H1;KIAA0040
ERF	4	ITGA1;CLMN;TESK1;DDX17
SLCO2B1	4	PNKD;MMP2;ARHGEF10L;FCER2
HSPA2	4	ASPH;GET4;ERN1;SCARA5
NCAM1	4	QKI;PDLIM7;NTM;TSC22D4
ANXA4	4	SPTAN1;CCDC51;ACOT8;RECK
QKI	4	ARID1A;EHBP1;RXRA;ATP2B4
MAN2A2	4	F8;MRAS;KIAA0040;RXRA
L1CAM	4	SPTAN1;EPB41L4B;NCAM1;SLC44A1
MAML2	4	LRRC32;FAM214B;CCND3;CAV1
IFI30	4	MOB2;TXNDC5;ZNF385A;PSAP
CLDN12	4	SPINT2;SYNPO2;MRPL1;CAV1
RB1CC1	4	SH3D19;VWA5A;C7orf41;HPGD
KL	4	TXNDC5;PSAP;ATP2A2;S100A16
PLA2G16	4	MKKS;ASPH;MARC1;THRA
TLCD2	4	PHLDB2;ZNF800;TMEM141;FXYD1
SMIM10	4	ZNF800;ISLR;KAZN;RABGAP1L
NINJ2	4	HSPA12B;CD2BP2;MAPKAPK3;RAPGEF1
C5orf63	4	HDAC9;TTC32;ZBTB21;MCM9
UBXN11	4	SPTAN1;CD47;ADHFE1;DTNA
BMP2	4	ABI3BP;TSC22D3;BCL6;INPP4B
CD48	4	LSP1;SEPT6;ICAM3;CAPG
TBC1D10C	4	SEPT1;ICAM3;ACAP1;IL16
POLR2A	4	ARID1A;IFT27;CTC-429P9.4;GSTT1
MBNL1	4	CCDC50;CENPV;KIAA0040;RAB30
KIAA0100	4	HIPK3;ATP6V0B;LGI4;POLR3H
SLC39A14	4	MME;SBNO2;COL27A1;RGS3
PLXNB3	4	ARHGEF40;TBC1D16;PMEPA1;FXYD1
TMEM62	4	MFSD10;TEX10;UGP2;AKT1
CD9	4	CCDC50;SMOC1;KIAA1199;ADAMTS2
SCNN1D	4	PEX19;PKIG;CDC42BPA;FBXO32
POLR2E	4	OXA1L;ZNF76;CDC42BPA;RTN1
IGFBP2	4	MTUS1;PPP1R14A;COL1A2;CAPZB
LAMA2	4	HSPB7;MTUS1;CCND3;RECK
THBS3	4	C1QTNF3;FAM122B;LSP1;PXN
SLC40A1	4	HDAC9;TPPP3;ARRDC2;DTNA
N4BP3	4	ADAMTS9;BRE;SMG6;SCHIP1
MCM6	4	MDK;DTNA;ARRDC2;HRASLS5
ZBTB10	4	NR4A3;MAP3K8;RXRA;TRIB2
ELL	4	DNAJC4;CTSA;CYP26B1;RB1
NPY2R	4	CENPV;IGF1;NDRG4;PPP1R14A
IGFBP4	4	TXNDC5;PLS3;EPB41L2;PCED1A
NOSTRIN	4	STAT6;FAR2;ABLIM3;TNMD
SLC39A11	4	SLC3A2;PPP3CC;HAPLN3;NOL3
PPP1R14A	4	HDAC9;STAT6;ARHGEF3;SPTAN1
MGEA5	4	FAM69B;AUP1;IQGAP1;PSMB10
MMP7	4	C7orf41;TXNDC5;ITGB2;CCRL2
LBP	4	F8;CENPV;BID;PET112
XPO5	4	FBLN2;RCC1;CTSF;PNPLA2
PDE9A	4	BCCIP;PSAP;ATP2A2;SLC35A2
PCED1B	4	IL17D;PNKD;PLEKHG6;FXYD1
KHDRBS3	4	MOB2;RND3;PLEKHG6;TPRG1
SYNE3	4	PHF15;BCL6;MAPKAPK3;ARHGAP24
CITED4	4	ST6GALNAC6;PLIN1;PMEPA1;PET112
PELI2	4	ITGA1;CHN1;UBTF;ABLIM3
EPS8L2	4	SYNGR1;SPTAN1;HDAC9;GSN
FAM188B	4	CENPV;TSC22D3;COL5A1;ABCB6
STARD13	4	SLC2A4RG;CENPV;IPO11;MRPL1
ABCA6	4	SPIDR;CCDC39;DMD;RASSF4
CCDC51	4	DCLK1;SUV420H1;KRT5;FBXW7
OSGIN2	4	ZZEF1;ZNF775;C1QTNF7;PET112
CBR3	4	C19orf44;TBRG4;ABLIM3;HNRNPH3
THSD7A	4	MYBBP1A;DUSP23;RNASEH2C;CLDN15
C9orf72	4	SLC39A10;VCL;ATP2B4;SYNPO2
PDGFC	4	ACSL1;PMM1;MMP28;LRP1
CHST11	4	MTUS1;LSP1;CAPG;RXRA
ZNF740	4	HSPG2;AEBP1;TRO;FOSL2
GFRA2	4	FEZ1;ABI3BP;ADORA3;CD37
PRKCE	4	SLC2A4RG;ITGA1;GEM;SLC7A8
GPER1	4	F8;PTGDS;RGS3;CLDN15
KIAA1671	4	TBC1D16;CXCL12;TXNDC5;CBLL1
KIF22	4	NAV1;SRSF1;PDE9A;TMEM165
FER	4	SNRNP25;CYP4X1;PKIG;ADAMTS9
TACC1	4	TSC22D3;CYP4X1;CCND3;DHX15
SLPI	4	FBLN2;PTGER3;DNMT3A;THRA
SLC43A1	4	CIRBP;ZNF385A;TBKBP1;CTSF
KLHL31	4	PEX19;C1orf52;ZFAT;DOCK6
WBP5	4	FAM69B;GYG2;MRPS14;HYI
LRCH1	4	PALMD;USP2;ACSL1;MARK1
LCN10	4	PEX19;RAPGEF5;SIGIRR;SIX5
CMKLR1	4	NDUFAF6;FLRT2;C3orf18;RNF103
BAIAP2	4	F8;GPER1;TMEM2;AGAP1
CRY2	4	COQ9;TLN2;CDC42BPA;ITGAE
LGALS1	4	ME1;PSMB10;PCGF5;CPSF3L
ZCCHC14	4	PMP22;TSC22D3;PDE8B;MAP2K6
FOXN2	4	TGFBI;USP2;BIRC2;PIK3R1
MGAT2	4	UBTF;PKIG;NUDT14;TRADD
IRF5	4	BCL6;FLRT2;TMEM165;SLC1A3
CDNF	4	HYI;MKKS;PSMB4;RGS3
SMCR8	4	SRSF1;PSMF1;NDUFAF6;MCOLN1
CLMP	4	KIAA0040;EHBP1;TMEM164;UGP2
PMAIP1	4	MAGI1;KLF3;SUV420H1;DIAPH2
CHD6	4	SPATA13;PKIG;ADD3;STARD5
CHD1	4	NR4A2;RAPGEF5;USP2;TGFBI
CBLB	4	HDAC9;THRA;GLYCTK;FXYD1
TBC1D16	4	SYNGR1;RPTOR;ISLR;ATP2B4
PGRMC1	4	CDKN1C;IFT27;CLSTN3;CAV1
ANP32E	4	SLC2A4RG;DGAT1;TRIB2;SMAD3
HRASLS5	4	PPP1R16A;TP53I13;NFIA;PSMB10
KIF7	4	UBE2I;DTNA;EHBP1;ARHGEF40
SCARF2	4	MXRA8;PPP1R35;ZNF467;GSN
TPCN1	4	PNPLA2;BCL6;TLN2;MCM9
KDM5B	4	DGAT1;ANKRD17;NAV2;TBRG4
ZNF503	4	CAPN5;CXCL12;FBXW5;ACOT8
MDK	4	IL17D;PMM2;COL14A1;MTA3
C6orf106	4	MKKS;TMEM100;ADAMTS9;ITPR1
KLF13	4	PEX19;SMARCD2;ACOT8;MBTPS1
GIMAP8	4	F8;EGFL7;RASGRF2;CLSTN3
KIFC3	4	CENPV;C1orf213;PLEKHG6;IPO11
ANO6	4	ADAMTS9;HES4;KIAA0040;RASGRF2
SGK223	4	OGT;SRSF1;PXN;WHSC1L1
KIAA0430	4	DDX17;MTUS1;RPTOR;ADAMTS2
FAM83G	4	CENPV;STPG1;TMEM88;FBLN2
SHOX2	4	IL17D;TXNIP;C1orf95;TP53BP1
RHBDL1	4	SH3D19;POR;PLXDC2;USP53
CEBPD	3	SPIDR;PFKFB3;MXRA8
FOSB	3	ANXA1;TPPP3;NCALD
LRP1B	3	MAOA;WWP2;FXYD1
PYGM	3	MAPKAPK3;MYL6B;CRYAB
PKHD1L1	3	P2RX1;MYH11;SMTN
F10	3	PCOLCE;FBLN2;CCDC39
C11orf89	3	LSP1;ABLIM1;IFI27L2
TWIST1	3	HDAC9;DDX5;RNF103
CLDN1	3	NR4A2;MPZ;ITGB4
S1PR1	3	F8;COL18A1;SULF2
NES	3	PLS3;CXCL12;DIXDC1
SFRP4	3	PCOLCE;C1QTNF3;ISLR
RSPO3	3	MYH11;SMTN;SYNPO2
GFAP	3	MBP;IL17RE;CRYAB
NLGN2	3	HDAC9;PDLIM7;PCED1A
KRT1	3	TNNI2;TPR;KRT5
NTS	3	P2RX1;MYH11;SMTN
PLS3	3	MYH11;CXCL12;DUSP23
BMP1	3	BCL6;MAPKAPK3;RGS3
MAOA	3	MAPKAPK3;GLYCTK;FXYD1
SLC5A6	3	PLEKHG5;UGP2;MX1
PLA2G7	3	LSP1;ZNF385A;MSR1
PIP4K2C	3	SLC2A4RG;PDLIM2;PLEKHG5
ETNK2	3	GLDN;RCL1;CLSTN3
MLIP	3	QKI;MBP;TSC22D4
FBXO31	3	USP2;SCHIP1;ARRDC2
ZNF697	3	CENPV;ARHGAP6;EHBP1
PPIC	3	MTUS1;CCND3;COL1A2
KIAA1033	3	ZBTB1;DDX42;DCLK1
SLC7A2	3	MTUS1;RAI2;TSC22D3
DUSP4	3	GPAM;SREBF1;YBX2
TREM2	3	LSP1;ZNF385A;MSR1
MFSD3	3	PEX19;RXRA;GYG2
DEDD2	3	OGT;YARS;CTSF
PROSER2	3	EHBP1;PPP1R14A;SYNPO2
CPXM2	3	PLS3;CMIP;PRKCE
C1orf21	3	PCOLCE;PRKAG2;TMTC2
MYL2	3	TCAP;MYL3;PDLIM3
GAB2	3	C7orf49;IGF1;KIAA0040
SGK2	3	ARHGAP6;ARHGEF40;FXYD1
NHS	3	BCL6;MMP28;RGS3
YPEL5	3	IGF1;MAPKAPK3;CLSTN3
SCN7A	3	MPZ;MBP;TSC22D4
SEMA3F	3	FAM120B;ITPR1;ARRDC2
ZNF385A	3	PARP16;FBLN2;ABLIM1
H1F0	3	CPSF6;CBY1;USP53
MB	3	TCAP;TNNI2;PDLIM3
PPTC7	3	MPP1;ACOT8;MARS
FANCL	3	RBM26;SRSF1;GAB1
VPS13A	3	RPTOR;EHBP1;VCL
ENO2	3	NR4A2;BRE;CDK16
DIRAS1	3	RPTOR;SMTN;IFI27L2
TRIO	3	DGAT1;LSP1;TTC37
STAC3	3	ZNF385A;PSAP;PRKACB
ARHGEF3	3	CENPV;RXRA;CALML4
POFUT2	3	PSAP;LSP1;TLN2
DAB1	3	P2RX1;MYH11;SMTN
PPT1	3	LAMB1;PSAP;CD37
SLC25A48	3	NR4A2;MPZ;TSC22D4
GADD45B	3	TMEM9B;SPIDR;DDX17
PAN2	3	THRA;ITGAE;SYNPO2
KRT5	3	C7orf41;TRIM29;PET112
RTN4RL1	3	IGF1;SPTBN1;BCL6
DOCK5	3	MBP;MPZ;TSC22D4
TNFAIP2	3	FBLN2;CAPN5;SGCE
MICAL1	3	SMTN;UBTF;DTNA
ZNF428	3	DCAF5;RXRA;MTA2
TCP11L2	3	SH3D19;IFRD2;CTSF
EHHADH	3	TUT1;SCRN2;BIN1
CYP27A1	3	ACP5;CNIH3;PMP22
CEP57	3	IL17D;FBLN2;IFT27
TMOD1	3	MYH11;SMTN;PDLIM7
RASSF5	3	IL17D;SLC38A10;GNPDA1
FHOD1	3	DGAT1;CRTC1;PHF21A
MOB2	3	RXRA;CABIN1;ICAM2
CTSK	3	AMPH;CCDC39;DMKN
PODN	3	LSP1;CCDC39;MAPKAPK3
ATP9A	3	SBNO2;RAPGEF1;FXYD1
SNX20	3	FAM69B;ACAP1;PSMB10
PPARG	3	SORBS1;CXCL12;ARRDC2
XYLT1	3	ADCY5;BIN1;ACOT8
XXYLT1	3	SMTN;BCL6;CCND3
LGALS12	3	PPP1R16A;PPP1R1B;GLYCTK
COL9A3	3	QKI;MPZ;TSC22D4
IGF1	3	CD2BP2;MAPKAPK3;CLSTN3
CLK1	3	DMXL1;GSTT1;CALM1
BST2	3	UPP1;PSAP;PXN
GYS2	3	GLYCTK;CRYAB;TRO
DNASE2B	3	CYP26B1;CTSA;CNIH3
FMO4	3	COG1;NGLY1;MKKS
TMEM139	3	SELENBP1;SCRN2;FXYD1
RBMS3	3	CENPV;CNIH3;MSR1
MYCBP2	3	CACNA1H;BCL6;DTNA
MPZL2	3	SLC22A23;LDLRAD2;UPP1
PCK1	3	SCRN2;GLYCTK;PPP1R16A
WISP2	3	CCDC39;CTSF;FXYD1
DMPK	3	AGPAT3;DIAPH2;CALM1
PMP22	3	SPTAN1;LSP1;SLC44A1
MIB2	3	PTPRS;BICD2;COL1A1
ETS1	3	PLS3;CXCL12;PTS
SLC22A15	3	PSMB10;AUP1;ADAMTS2
LGR4	3	HYI;RASSF4;ACKR3
CACNA1H	3	NXPH3;CABIN1;CALM1
DIXDC1	3	SCRN2;PEMT;HYI
ULK1	3	PCOLCE;CAPN2;SMAD3
IRF2BPL	3	DGAT1;SEC61A1;RXRA
LHX6	3	CASC3;ITGA1;CALML4
PARVA	3	PCOLCE;UAP1;ARHGEF40
CHST15	3	DBNDD2;PNKD;RGS3
PTPN5	3	MPZ;MBP;TSC22D4
ISOC2	3	PNPLA7;RXRA;FXYD1
KSR1	3	AEBP1;BCAR3;AIMP1
NPL	3	PSAP;PNKD;COL1A2
CD2AP	3	ACSF2;TXNDC5;PLS3
ISLR	3	SYNGR1;LSP1;SULF1
TACR1	3	SBNO2;FLNB;CMIP
PIWIL4	3	C1QTNF3;IFI27L2;CALM1
CALM3	3	CENPV;MMP19;CALM1
PAMR1	3	FBLN2;S100A13;SPTAN1
TRAF3IP3	3	SEPT6;SEPT1;ACAP1
PPP1R3E	3	SLC39A10;MTERFD3;THRA
SMARCA1	3	HDAC9;RAI2;RNF217
CTGF	3	CCND3;ENPP2;KIAA0040
KIAA0040	3	MTUS1;RXRA;STK39
CD2	3	SEPT1;SEMA4D;ACAP1
MAGED1	3	IL17D;FBLN2;CDKN1C
BCAR3	3	ZNF385A;BCL6;RCL1
SOX17	3	SLC22A23;SPIDR;AP1AR
SH3TC1	3	TSC22D3;KIAA0040;MFGE8
ANO8	3	BCL6;MAPKAPK3;RGS3
PDK4	3	GPAM;C1QTNF7;YBX2
DPP4	3	SPTAN1;CCDC39;COL14A1
ESR1	3	ITGA1;MAPKAPK3;TNKS1BP1
OMD	3	IL17D;SH3KBP1;ANXA4
TSPAN2	3	LAMA4;TXNDC5;DTNA
IVNS1ABP	3	HSF1;ADAMTS9;AKAP12
COL3A1	3	SHOX2;ADAMTS2;COL1A1
MEOX1	3	LAMB1;DGAT1;PLEKHG5
LRRC1	3	BACE2;COL5A1;MRPL1
RSPO1	3	PET112;PPP1R14A;FXYD1
HEATR1	3	OGT;TEX10;DYNC1LI2
ACSS2	3	PLCD4;FAM219B;YBX2
ALDH1L1	3	ADCY5;WDR86;GLYCTK
GSE1	3	PCOLCE;SCRN2;COL1A2
ACLY	3	CTSF;ARRDC2;CCDC109B
SPG7	3	CFI;FBXW5;DPYSL3
HPGDS	3	IL17D;SLC18A2;FEZ1
USP15	3	C7orf41;DDAH1;DMPK
LCNL1	3	MBP;TSC22D4;NARS
ALOX5AP	3	CAST;ABI3BP;MSR1
PHYHIP	3	VDR;MAPKAPK3;ATP2B4
OLFML3	3	CENPV;SGCE;PRKAG2
ADIPOR2	3	DGAT1;HDAC9;ARRDC2
GFRA1	3	SYNGR1;SGCE;ITPR1
SQSTM1	3	CNIH3;CRYAB;MSR1
DDO	3	DENND1A;PNKD;PLEKHG6
ADK	3	DGAT1;MARK1;GNAI1
DCXR	3	SPHK2;OSGEPL1;FXYD1
PMP2	3	LHPP;TNNT2;TSC22D4
EBF1	3	CENPV;PRKAG2;RNASEH2C
ARHGEF26	3	MAPKAPK3;GLYCTK;RGS3
HOXB3	3	SCML1;ABLIM1;RASGRF2
ACSL5	3	TNMD;HOXB3;COL1A1
HES1	3	SLC22A23;LRRC32;HES4
TIAM2	3	CLK1;POGK;CALM1
PNRC1	3	SPIDR;RASSF4;CENPV
FAM69B	3	CCND3;EIF2S1;WDR33
NFIX	3	SMTN;MUM1;ATP2B4
PNMA1	3	HYI;PRKAG2;GNAI1
PVRL4	3	CTSA;TRIM29;SESN1
CD5	3	CYBA;SEPT1;ACAP1
YIF1A	3	ZNF518B;PCGF5;AKAP8L
SURF4	3	CABLES1;NEDD4L;IL17RE
LRRC8C	3	MTUS1;SBNO2;NR4A3
KIAA1522	3	SYNGR1;PDLIM7;THRA
MAN2C1	3	PATZ1;CLSTN1;CD2BP2
CYBA	3	TFG;AEBP1;ATF3
SIK1	3	NR4A2;SLC22A23;LRRC32
HEY2	3	MOB2;PHYHIP;CABIN1
SOX8	3	MBP;TSC22D4;ITGB4
DGKD	3	MAPKAPK3;SCHIP1;CLSTN3
GPD1L	3	CABLES1;CDH23;CRYAB
ACAP3	3	LSP1;ACOT8;S100A16
ARL15	3	F8;CLINT1;CLDN15
TMEM79	3	SCML1;C1orf123;FKBP2
IGSF9B	3	SYNPO2;ATP2B4;PPP1R14A
IZUMO4	3	PLCD4;EHBP1;FXYD1
CLEC10A	3	CTSA;SNX24;FBLN2
MDFI	3	CCND3;PNKD;FXYD1
HDC	3	PCOLCE;SLC18A2;LARP6
FDXR	3	MYH11;SMTN;CENPV
CYP4F22	3	GLYCTK;KIAA0040;FXYD1
PAM	3	C1QTNF3;SGCE;ACOT8
PAG1	3	USP2;BCL6;CCND3
PYROXD2	3	CABLES1;SIX5;COL5A1
PLP2	3	SMOC1;WDR86;ACOT8
TESK2	3	PHF21A;HNRNPM;DPYSL3
SRBD1	3	CDKN1C;MAPKAPK3;CLSTN3
SPIN3	3	ACVR2A;SRSF7;DHRS1
C1orf122	3	NBAS;DMPK;CALM1
CPVL	3	HDAC9;CDK16;CD37
BRSK2	3	MOB2;MBP;TSC22D4
TSPAN3	3	MAPKAPK3;TXNDC5;RGS3
SLC25A27	3	SBNO2;USP2;VDR
CTXN1	3	RPTOR;VCL;KCNMA1
RAMP2	3	DGAT1;CXCL12;RAPGEF1
SOBP	3	CTSF;MFGE8;PLXDC2
TLN1	3	RABGAP1;ISLR;AEBP1
SLC25A18	3	PDLIM7;FBXW5;FXYD1
ANKRD13B	3	LAMB1;ACOT8;UGP2
PDIA6	3	MKNK2;MFSD10;PLXDC2
PDK2	3	CCDC50;LIPE;IQGAP1
TMEM51	3	STX4;HMG20B;ITGAE
GNAO1	3	RPTOR;SPTAN1;C14orf28
AURKB	3	CDK1;MBP;TSC22D4
MAST4	3	LDLRAD2;RASSF4;RASGRF2
KLF9	3	COL6A1;CD7;FBXW5
FHOD3	3	MAPKAPK3;VCL;RGS3
PHF21A	3	HDAC9;MMP19;MMS19
DACT2	3	FBLN2;SGCE;IFI27L2
PCP4L1	3	SMTN;PPP1R14A;PDLIM3
MAML3	3	CCND3;PSAP;PLEKHG5
TIAM1	3	F8;USP1;CMIP
NID1	3	MTUS1;GUCY1A3;SEPT1
CPZ	3	MOB2;FBLN2;COL1A1
TRIM44	3	PDE8B;GSTT1;DIAPH2
PTPRG	3	MTUS1;SLC39A10;NOL3
ZUFSP	3	MARCH5;DCLK1;ADD3
RRP9	3	FBLN2;THRA;MED26
RARRES2	3	ARHGAP6;ARRDC2;CLSTN3
KLHL36	3	CLK1;CLEC2B;SPTAN1
GPATCH4	3	SPTAN1;DCLK1;FBLN2
PAQR6	3	LHPP;MBP;TSC22D4
CXCR4	3	TUBA4A;SEPT1;PET112
FIBIN	3	COL6A1;SPIDR;CCND3
EGFR	3	ITGA1;PKIG;IL16
ATPIF1	3	ABLIM1;RXRA;NRF1
NTN4	3	STUB1;LAMB1;TXNDC5
LGALSL	3	RARA;PHLDB2;PRKAG2
CCSAP	3	CNIH3;ZNF385A;STX4
FGGY	3	TNIP1;C1orf123;THRA
EPS8	3	CCND3;MTMR10;SYNPO2
MYO1B	3	MTUS1;CCND3;TPRG1
AC139100.2	3	DDX17;CDH23;ZNF800
SPTBN4	3	DGAT1;SREBF1;MBTPS1
CKB	3	RPTOR;ATP2A2;DMPK
CD3E	3	SEPT1;ACAP1;DENND2D
NHSL1	3	FBLN2;CGGBP1;SGCE
DCSTAMP	3	CTSA;CNIH3;CAPG
CTSG	3	SLC18A2;STX3;ANGPTL2
SMURF1	3	MOB2;MFSD10;GSPT1
MAZ	3	CLK1;COASY;SEC24C
ADCK4	3	HDAC9;FAIM3;CENPV
GRK5	3	PMM2;CLSTN1;SYNPO2
SEMA4B	3	CENPV;RNF217;LAMA4
NOD1	3	APMAP;BCL6;ZCWPW1
TP53BP1	3	DNASE1L1;LSP1;PSAP
PJA2	3	COL18A1;LRRC32;ARHGEF3
AGTR1	3	SPON2;IGF1;MAPKAPK3
LYVE1	3	ADORA3;SGCE;MSR1
EZR	3	CCND3;AEBP1;ARHGEF3
FBN1	3	C1QTNF3;LSP1;ABI3BP
RRAD	3	AEBP1;BCAR3;ARRDC2
MOSPD1	3	SYNGR1;CENPV;CNIH3
DNAH9	3	DGAT2;TK2;CLSTN3
TMTC1	3	F8;CCND3;RXRA
PDE8A	3	CENPV;WDR33;DDX17
DUS1L	3	GLCE;YARS;CD2BP2
GALNT18	3	F8;FBLN2;ARRDC2
ZNF395	3	FBLN2;SMG6;CTSF
EFNB1	3	CENPV;ARHGAP6;MLPH
NPNT	3	FBXO32;PDLIM2;RIN3
WDFY2	3	ARHGAP24;UBTF;FAM208B
HSPBAP1	3	RPTOR;THEMIS2;ATP2B4
ADCY5	3	BCL6;MAPKAPK3;PDE8B
PTPN13	3	PCOLCE;HDAC9;COL1A1
ADAM15	3	CDC25B;CDK16;CALML4
GRM2	3	RECK;HEMK1;RER1
CPNE2	3	MYH11;COASY;THRA
LHFP	3	CD44;WWP2;FXYD1
MXI1	3	RBM26;FBLN2;CTSF
SRGN	3	RARA;BRE;PGRMC2
TMED5	3	CENPV;ARHGAP6;MSR1
ISOC1	3	RAPGEF5;SYNPO2;ABCC3
ILK	3	CAB39L;DDAH1;SH3BGR
MRPS6	3	TMEM100;RPRD2;STRA13
PPP2R2B	3	MOB2;MPZ;TSC22D4
RAB9B	3	RPTOR;EHBP1;ATP2B4
PLVAP	3	F8;ITPR1;RXRA
SNX33	3	GPAM;PCTP;KIAA0040
NDRG1	3	RAPGEF5;PHLDB2;ADAMTS9
LAMB1	3	BAIAP2;MFGE8;RGS3
DMRT2	3	MTUS1;CCND3;WDR86
ST14	3	ZNF385A;CAPG;FST
FKBP2	3	PINK1;TNNT2;FBL
CLUH	3	TNPO2;CLSTN3;THRA
ADHFE1	3	TCEA2;CTSF;PLCD1
ACTG2	3	PDLIM7;CYFIP2;PDLIM3
RASSF7	3	FBLN2;USP2;CTSF
DNER	3	FBLN2;RASSF5;CELF2
TMEM255B	3	CD47;DUSP23;ABLIM1
LRP11	3	BCL6;MTERFD2;SPTBN1
STK39	3	HDAC9;GLYCTK;TBRG4
ZBTB46	3	AQPEP;UBTF;PLEKHG5
HSPB8	3	BID;MRAS;ARHGEF40
ABCG2	3	MMRN1;LSP1;LNX1
SHISA3	3	MTUS1;TXNDC5;ITGAE
L3HYPDH	3	YIPF1;SH3D19;EIF4E3
DVL2	3	DNASE1L1;SREBF1;CTSF
USP24	3	MKNK2;TRO;MIF4GD
CD44	3	SYNGR1;ABI3BP;IFT27
SMTN	3	ARHGEF28;DIAPH2;ESAM
KPTN	3	MKNK2;MFSD10;CD2BP2
CPSF4	3	BCL6;RBPMS;SYNPO2
DCN	3	IL17D;MME;IFI27L2
FCER1A	3	SLC18A2;ABI3BP;FBLN2
COL18A1	3	COL1A2;CDH23;ENPP2
CHSY3	3	RAI2;WWP2;SYNPO2
KRTDAP	3	DMKN;KRT5;CKAP5
CLIP3	3	SPTAN1;CHN1;PIGZ
SLAIN2	3	DGAT1;DGAT2;LENG8
SORCS2	3	ISLR;TSC22D4;BNC2
PTH1R	3	CEP89;DMPK;PPP1R14A
CALU	3	COG1;QKI;THRA
SELE	3	TP53I13;DLC1;CREB5
AVIL	3	C1QTNF3;USP2;FBLN2
TOP1MT	3	RAP2C;ATP6V1C1;SLC44A1
DUSP16	3	LNPEP;CLMN;THRA
SERGEF	3	KIF13A;SYNJ1;ANXA6
DECR1	3	ATP2B4;TNC;SYNPO2
MCM7	3	CDKN1C;TPRG1;CLSTN3
FGD1	3	SPARC;PDLIM7;ADAMTS2
IRX3	3	IL17D;AGPAT4;SUV420H1
ELFN1	3	SDR39U1;CXCL12;UBTF
PITPNM2	3	RPGR;UAP1;TESK1
PARP16	3	HDAC9;DCLK1;RNF103
NCEH1	3	CTSA;SMOC1;CAPG
B3GNT2	3	ATP2A2;ITGA6;ITGAE
IL1RAP	3	CENPV;PRKAG2;SH2D3C
MCM2	3	SH3GLB1;CTSF;RAB30
RALGDS	3	PRKAG2;LRRK2;SLC25A25
ANKRA2	3	SESTD1;MPDZ;DDRGK1
PHF3	3	PNKD;ZBTB16;STARD5
TMEM88	3	DGAT1;UGP2;MCM9
ITPR1	3	PEX19;C1QTNF3;DMPK
CITED1	3	MME;PMP22;NTM
TSC22D1	3	COL18A1;FAM120B;LPCAT4
GIMAP4	3	F8;MTUS1;EGFL7
PIK3IP1	3	DHRS12;PMM1;YARS
HRSP12	3	SUV420H1;DMPK;CALM1
PHF19	3	PNKD;COL14A1;TRIM29
HECW2	3	TNMD;AGPAT4;RAPGEF1
PRRT2	3	DGAT1;MYO1B;S100A16
C15orf38	3	MKNK2;DIAPH2;PDE8B
ZFP1	3	DDX5;SCML1;PTGER3
MYO1D	3	PCOLCE;GLYCTK;FXYD1
RTN1	3	C7orf41;ITGA6;FXYD1
ISM1	3	CCND3;SLC7A8;THRA
ARHGEF10L	3	MOB2;LYNX1;PPP1R14A
GNA13	3	NR4A3;KLF3;DIAPH2
ST6GALNAC1	3	PMM2;KHDRBS3;CALML4
CDC7	3	SBNO2;YARS;LNX1
PACSIN3	3	SPTAN1;ZMYM1;CALML4
RHOU	3	SBNO2;PLS3;LAMA4
DENND3	3	LAMB1;SESN1;KIAA0040
ST3GAL4	3	BCL6;SEC61A1;WDR33
ROR2	3	ABI3BP;SGCE;ASB1
CALML5	3	FBXO3;TRIM29;KRT5
ADAMTS15	3	GPD1L;VDR;ITGA1
SLC7A4	3	TK2;MRAS;ARHGEF40
HMBS	3	ADD3;CAPN2;EPC1
KCNQ4	3	RPTOR;ATP2B4;DTNA
IARS	3	DGAT1;TTC32;CDC42BPA
CTSD	3	CNIH3;MMP19;MSR1
FBXO32	3	DDX5;SGCE;SMAD3
LMO4	3	RAPGEF5;ABLIM1;PEMT
TREH	3	SCPEP1;DGAT1;TESK1
GSAP	3	MKKS;PCGF5;RGS3
SLC35G1	3	EIF2S1;RXRA;TRO
ENKD1	3	PCOLCE;LGI4;PCGF5
PPFIA3	3	SBNO2;TESK1;HAPLN3
PRIMA1	3	MPZ;TSC22D4;ITGB4
EVC2	3	IL17D;SLC22A17;PCTP
IRS1	3	HSPB7;SREBF1;FBXO32
ZBTB38	3	DGAT2;RXRA;CLSTN3
ITGB1BP2	3	RPTOR;PDLIM7;DTNA
CCDC88A	3	CCDC50;EPB41L2;DTNA
MLH3	3	TANK;CDC42BPA;CALM1
DYRK1B	3	ABCA6;COL27A1;PMM1
CNIH2	3	SLC2A4RG;RGS19;PGS1
NOTCH4	3	TUT1;BAIAP2;THRA
C12orf5	3	MOB2;DGAT1;TXNDC5
TMBIM1	3	DGAT1;PRKAG2;CLSTN3
SPATA2L	3	BRE;PPP1CB;RNASEH2C
FLYWCH2	3	TSC22D3;COASY;RXRA
PARVG	3	HDAC9;DGAT2;CD72
SEMA6D	3	SETDB2;ARRDC2;P2RX6
FHL3	3	MAPK13;FUK;THRA
TP53I3	3	MOSPD3;IL17D;RXRA
RNF182	3	MTUS1;PTPRS;SYNPO2
GPR64	3	C7orf41;MAPKAPK3;ZFAT
RGL1	3	MFI2;CTSA;IFITM10
CNTFR	3	IGF1;MAPKAPK3;PDE8B
PPP1R35	3	RNF19A;CBLL1;SEMA6A
LCP1	3	ZNF385A;TANK;PDLIM2
CYBB	3	VAMP8;DCLK1;NCF4
ARHGAP29	3	ACP5;CD163L1;STARD5
E2F1	3	PEX19;DECR1;PNKD
SOCS1	3	FBLN2;LAMA4;MID1IP1
LNX1	3	RAPGEF5;CCND3;MCM9
ADAM12	3	FBLN2;ISLR;SGCE
RGL2	3	AKT1;MPZL2;FOSL2
ANKRD28	3	SLC2A4RG;DGAT1;TTC37
SARS2	3	PNPLA7;FBXW5;CLINT1
FABP3	3	SMTN;EHBP1;KCNMA1
MUSTN1	3	MOB2;RIN3;CABIN1
DHX35	3	SMTN;EHBP1;VCL
SLC2A13	3	RAI2;SUV420H1;ECM1
PKDCC	3	FHOD1;SRSF7;SCRN2
HSPA12B	3	RAPGEF1;HSD17B6;CALML4
HEY1	3	SLC22A23;CXCL12;RASGRF2
SLC46A3	3	CD47;SRSF1;MTMR10
SLC7A10	3	SLC2A4RG;GPR64;WDR86
CABIN1	3	PHF15;RGS3;CCDC51
CAT	3	MTUS1;ARRDC2;FXYD1
RASD1	3	NR4A2;SPIDR;BRE
BMPR1B	3	SYNGR1;TNNT2;GSTT1
WDR81	3	MBOAT2;MAGI2;COL1A1
PIK3AP1	3	HMHA1;FEZ1;CD163
CENPO	3	BCL6;MAPKAPK3;HDAC7
MATK	3	LSP1;ZNF385A;MMP19
HMCN2	3	LHPP;MYH11;VCL
C1QA	3	ADORA3;RNF103;MSR1
TMEM86A	3	CD47;LSP1;IL16
NRBP2	3	PSAP;TSC22D4;RGS3
NTN1	3	FBLN2;MYH11;ACKR3
TRMT1L	3	HEMK1;TTC37;C10orf137
NT5E	3	SYNGR1;SGCE;TTC37
GSTZ1	3	ASPH;TSPYL2;TMEM123
TYK2	3	RPTOR;TEX10;STARD5
RAB23	3	PRKAG2;AEBP1;DTNA
CA4	3	RAPGEF5;SRSF1;TNMD
SDPR	3	CYTH4;ABLIM3;SIDT2
TRIQK	3	F8;MTUS1;USP2
COLCA2	3	ITGA1;C1QTNF3;CLSTN3
BICC1	3	GPD1L;CENPV;GNAI1
C15orf61	3	CBLB;WWP2;RILP
ADRBK1	3	UNC119;SCML1;THRA
GSTA4	3	SPIDR;PXN;MID1IP1
APRT	3	CENPV;ISLR;CLSTN3
DLX5	3	ANXA1;DIAPH2;PPP1R14A
COL1A2	3	C1QTNF3;COL14A1;ADAMTS2
GALNT13	3	CEP89;C1QTNF3;PSAP
ANG	3	CALM1;VPRBP;HTRA3
FAM214B	3	DGAT1;FHOD1;ACSF2
NAPEPLD	3	HECTD2;MCM9;ANXA6
CHRD	3	HDAC9;PLS3;PXN
DHRS12	3	SCRN2;RABGGTA;HYI
CD70	3	SPTAN1;S100A13;ABI3BP
CASP12	3	SYNGR1;SBNO2;ITPR1
RNF150	3	SMTN;GLYCTK;PLCD1
CHI3L1	3	LSP1;IFITM10;MSR1
TNFSF8	3	HDAC9;HMHA1;ACAP1
RPP25L	3	CCDC51;COL14A1;HIRIP3
S100A13	3	IL17D;PXN;THRA
HSPBP1	3	MDFI;MXRA8;SLC27A3
PANX1	3	AQPEP;GPAM;CLSTN3
CHST12	3	CENPV;MMP28;FAM69B
IGFBP6	3	IL17D;FBLN2;PARP16
LDLRAD4	3	NR4A3;GLYCTK;RXRA
SELL	3	HEXB;ACAP1;FAM65B
RXRG	3	CENPV;MPZ;TSC22D4
REEP1	3	NXPH3;PDLIM7;ATP2B4
LYN	3	PSAP;PDLIM2;UGP2
SLC20A1	3	NOVA1;ADAMTS9;PLD1
ZNF521	3	MYBBP1A;ATP2B4;CALML4
MCOLN3	3	AGAP1;SEPT1;MPZ
C7orf63	3	HDAC9;VCL;TNC
CNN3	3	SBNO2;COL5A1;CENPV
VPS13C	3	DDX5;MPDZ;PPFIA1
GLTPD1	3	SLC44A1;IL16;HMG20B
MBD2	3	SPARC;C7orf41;REEP5
NCOA2	3	TIAL1;MCM9;EPC1
TMEM37	3	SBNO2;RASSF4;TRO
GDPD3	3	CRTC1;UBTF;CELF2
TBX18	3	MOB2;TMX3;ARHGEF9
ANGPTL1	3	CYP4X1;IGF1;RXRA
IGSF21	3	SEPT4;AMPH;PRDM2
TMEM8B	3	ACSL1;TLN2;SLC35A2
DSP	3	FLNB;GPR64;MX1
C6	3	PEX19;PTPN23;CCND3
TAS2R20	3	DXO;TMEM165;MBTPS1
HIST1H4H	3	MKNK2;MKKS;HTRA3
HMCN1	3	CDH23;DPYSL3;ADAMTS2
CCDC85A	3	F8;BCL6;ATP2A2
CYR61	3	RAI2;RCL1;CREB5
ITPRIPL1	3	MRAS;BCAR3;ITGAE
PLCD4	3	ZNF318;PLXDC2;TRO
ANKRD35	3	RARA;SPTAN1;RIN2
SH2D3C	3	ITGA1;SCARB1;RPGR
GYS1	3	ACAD11;C1QTNF7;ARRDC2
HTRA3	3	FBLN2;ZNF385A;PLXDC2
CLEC2B	3	CYTH1;DDX5;IFRD2
CCDC9	3	ZFPL1;DDX17;PLSCR1
SORT1	3	LSP1;PRKAG2;ZNF385A
IER5	3	ZFAT;KIAA0040;DIAPH2
AP1G2	3	HIPK3;UBTF;ANXA6
PDLIM3	3	PDLIM7;CYFIP2;ARHGEF9
TCF7L1	3	PKIG;TEX10;MTMR10
NEURL1B	3	SMG6;THRA;RGS3
NEDD4L	3	CCDC50;SESTD1;KRT5
DYRK3	3	COL6A1;SDR39U1;BEX4
ACD	3	TSC22D3;ASPH;DNM2
WASF1	3	CREBZF;MAPKAPK5;SUV420H1
CBX8	3	SNED1;FBLN2;ABI3BP
NUDT18	3	DDB2;COL6A1;CLDN15
CACNA2D1	3	C7orf41;SYNJ1;RXRA
BTK	3	FBLN2;SMTN;ZMYND15
EHD4	3	SCARB1;PSAP;TMEM25
MLEC	3	MECP2;IFI16;CCND3
FBXL15	3	MDFI;ACSS2;MXRA8
KLHDC8B	3	FGF13;BCL6;ZFAT
MMP17	3	UGP2;RASGRF2;CAPN2
VIM	3	ARHGAP6;CDC16;FXYD1
SPHK2	3	SUV420H1;DMPK;YBX2
ADCY9	3	PC;TXNDC5;GLCE
SNAPC4	3	STAT6;UNC45A;RXRA
TMEM81	3	LMF1;TTI1;MCM9
KIAA0408	3	AQPEP;CLMN;RASSF4
CD109	3	WDR86;SLC39A10;ACOT8
NAALAD2	3	DGAT1;MPZ;DTX1
RAB24	3	LAMB1;DGAT1;CDK16
NFIL3	3	CENPV;CD7;LAMA4
NDUFB7	3	RPTOR;AKAP12;DMPK
COL4A2	3	TPD52;PMP22;MFGE8
PRCD	3	CAMK2D;BCL6;AP006621.5
SNTA1	3	UBXN1;IFI27L2;FBXW5
NDNF	3	F8;PDLIM2;ARRDC2
PDHA1	3	SREBF1;CDK16;CCDC109B
DPYD	3	RECK;CCND3;RXRA
RUNX1T1	3	LSP1;DCLK1;SGCE
PID1	3	ISLR;PLK2;RNASEH2B
LRRC4B	3	SPTAN1;PRKAG2;EHBP1
SNAP25	3	FBLN2;MBP;ABI3BP
MAP1LC3A	3	PEX19;ST6GALNAC6;NCS1
OLFML1	3	SCRIB;SPON2;TCEA3
CSRNP3	3	CENPV;RAI2;PLAA
KRTCAP3	3	SLC35F5;CDH23;ZNF800
FILIP1	3	CCND3;SCHIP1;ARRDC2
LY6D	3	LRIF1;SPARC;DMKN
ZBTB17	3	USF2;PCDH18;DDAH1
MUM1	3	RCL1;TP53BP1;PSAP
NR2C1	3	CYTH1;FBXW5;KTN1
SLIT3	3	SYNGR1;SELENBP1;TSC22D3
HEMK1	3	PSMF1;BCL6;RGS3
HPN	3	MFSD10;KIAA1217;CMIP
MAFB	3	PRKAG2;RASSF4;SLCO2B1
GYPC	3	DGAT1;SLBP;MMP19
WNT10B	3	FBLN2;LSP1;SGCE
ZNF219	3	CABLES1;C7orf41;HDAC7
CLIP4	3	MPZ;CNST;SSFA2
GLI4	3	EPB41L3;TMEM175;NBAS
TMEM9	3	SMTN;TTC12;VPS13B
RASSF9	3	MEF2C;LYST;TMCC3
JRKL	3	HIPK3;CSTF3;CALM1
GLDN	3	TMEM100;BCL6;FXYD1
SLC38A10	3	BTD;CDH23;SNX8
HSPH1	3	C1QTNF3;S100A16;PPARG
KYNU	3	DNASE1L1;CD72;MFGE8
GRINA	3	SH3D19;SLC35A2;CLSTN3
CFI	3	DUSP23;PRKCE;FRS2
CPNE5	3	FBLN2;MPZL2;RPGR
LMOD1	3	HDAC9;PDLIM2;PDE5A
BID	3	CAPN7;WIBG;CD47
TNFSF13	3	SPTAN1;FBLN2;MSR1
PRRT4	3	SREBF1;ACACA;ZNF740
NLRC4	3	PLEKHG6;FBXO32;PDLIM2
NCAM2	3	LHPP;MBP;TSC22D4
NXPH3	3	MTUS1;ATP2B4;SYNPO2
PPM1J	3	SRSF1;FAM219B;CLDN15
ALOX5	3	MTUS1;CNIH3;CTSA
DMXL2	3	SMTN;DTNA;ADAMTS2
ZC4H2	3	CCND3;EHBP1;IPO11
PDIA4	3	SLC7A6;TYMP;MAGI1
WDR54	3	RPTOR;OLFM1;IPO11
SPRY2	3	CNR1;TRIB2;TNC
IFT27	3	CLK4;SLC35A2;ITGA6
VEGFC	3	RAPGEF5;ITPR1;THBS1
EPAS1	3	F8;IFI44L;GPER1
ABCC3	3	AIMP1;PI16;MSR1
MEOX2	3	HDAC9;RABGAP1;UCK2
STXBP2	3	SMAP2;PSAP;CD37
MAGI1	3	MYH11;USP2;CCND3
KANK3	3	MKNK2;TMEM259;FOSL2
CHIT1	3	CNIH3;CAPG;ADAMTS2
KIAA1217	3	CDH23;MPZ;KIAA0040
CHML	3	HMHA1;ARHGAP6;DPYSL3
ZMIZ2	3	AKAP8L;SEPT1;TLN2
ITGA10	3	SYNGR1;PLS3;VIT
RASGRF2	3	MTR;SBNO2;ITGA1
PGF	3	SCHIP1;CLMN;WWP2
NUDT5	3	PINK1;MKNK2;GYG2
MCC	3	F8;IFI16;CXCL12
ELN	3	CEP89;DDAH1;C1QTNF7
PLA2G1B	2	CPA1;CPB1
REG1A	2	CPA1;CPB1
CLPS	2	CPA1;CPB1
PEX5	2	CLSTN3;ZBTB47
PNLIP	2	CPA1;CPB1
PCP4	2	P2RX1;SMTN
CDC37L1	2	IGF1;RGS3
FCN2	2	SREBF1;CRYAB
TFPI2	2	TPD52;ZNF385A
PRDM16	2	MOB2;PPP1R14A
SYNM	2	MYH11;SMTN
RBM5	2	PSAP;RGS3
NR4A3	2	NR4A2;BRE
TWF2	2	GLYCTK;FXYD1
NISCH	2	LSP1;PSAP
AKAP13	2	SCRN2;CENPV
C16orf80	2	ANXA1;TPPP3
PDE8B	2	PPP1R14A;FXYD1
OSER1	2	KIAA0040;DIAPH2
SCNN1B	2	RAPGEF5;SCHIP1
ZAP70	2	SEPT1;ACAP1
APOBR	2	LSP1;ZNF385A
DRP2	2	TNNT2;TSC22D4
PFKFB2	2	SMTN;SYNPO2
GAS2L3	2	MBP;TSC22D4
PTGER3	2	DGAT2;BCL6
C4orf21	2	UBTF;FBXW5
RPS6KA1	2	LSP1;ZNF385A
PXDN	2	HDAC9;ACOT8
MYO1G	2	ICAM3;ACAP1
SDCBP2	2	SLC20A2;HNRNPM
ANKRD10	2	RBM26;BCL6
[truncated: 2,181 more rows]

## Sheet: Adipose − Subcutaneous (IR-TE)
FBLN2	148	FAM160A2;COL11A1;FXYD1;EVA1A;SCG2;BGN;MAN1B1;HIPK2;LDLRAD2;TMEM255A;BPIFB4;DBN1;GSN;ADAMTS5;BYSL;FNDC5;AVIL;FMNL1;APBB1;TPPP3;PPRC1;LIG1;MBNL3;NPR1;FMO1;PLBD1;CTSO;P4HB;ATP2B1;GPATCH4;PAFAH1B3;SNAP25;SOCS1;MAGED1;CPZ;RUNX2;ANGPTL5;PRR16;VIT;DDAH1;TNFSF13;STMN2;RRP9;NOVA1;NOP2;DCLK1;RASSF7;FHAD1;ALDH2;DENND4B;PDCD11;APOD;WDR43;XPO5;SOX12;WISP1;PAMR1;GRAMD3;HTRA3;PROCR;FIGF;ARL13B;WNT11;UAP1;LMX1A;…
CENPV	140	FAM198B;LRRC16A;NUDCD1;FDXR;SEMA4B;BICC1;DGCR8;DLG2;ADAMTS1;CALM3;GPR183;MAP3K6;ARHGEF3;NTRK2;CXCL14;ANKMY2;MBNL1;BANK1;MBNL3;SLC38A2;CDH20;DAAM1;EXTL3;APRT;TNIP1;CYP4X1;KIFC3;ABHD5;SLAMF1;CNN3;FBXL7;MRPL46;ZNF275;TCF12;TUBE1;BATF;STARD13;PNRC1;SLC7A6;NFKBIA;RASSF4;ZNF697;CNTN3;TRAF3;ZNF853;TRIB3;ARHGAP6;ADORA2B;MKL1;CSRNP3;NFIL3;ANGPT1;KCNIP2;MAP1B;CSK;LBP;ACSF2;HERC5;IGFBP7;GIMAP5;ANKRD29;LMNB2…
FXYD1	127	PCK2;TLCD2;AAAS;TUSC5;BGN;IZUMO4;ATP9A;SLC25A18;CPQ;PLIN1;NHLRC3;SPR;AQPEP;ESRP2;HEBP2;MBNL3;DEFB132;CDCA7;CBLB;CRISPLD1;TMEM139;LIPE;C20orf27;C20orf24;PRMT7;KIAA1551;C7orf41;PDE8B;SGK2;RSPO1;TWF2;CCDC80;VIM;SCN4B;ZCWPW1;PPDPF;TTC18;KDM5C;MMP15;PCED1B;SLC7A6;C12orf39;SLC29A1;KLHDC9;LAMB2;ACADL;TMEM132C;C16orf89;PLXNB3;APOD;GLDN;WISP2;THBS2;PNPLA2;ERMAP;GDF10;G0S2;EHBP1;IGFBP3;ZNF23;SCRN2;GALNT2;S…
HDAC9	125	TIMP3;TM7SF2;AP000322.54;TSPAN12;CCRL2;SRSF11;MYL9;DCK;CUL7;DMTF1;LUC7L3;CTSH;CBLB;TBXAS1;TRHDE;RNASE6;REV3L;TAGLN;SH3BGRL;SLC15A3;MYD88;SLC2A9;PARP16;ZFC3H1;PTPN13;FAT1;GNRH1;PXDN;FOXP2;ITGA9;PCED1A;IL10RA;STMN2;PNISR;MAMDC4;CRELD1;PHF21A;KAT2A;C5orf63;VPS37D;SSTR2;PCOLCE;TNS1;B4GALT2;NINL;PPP1R14A;EFEMP2;GCKR;ARGLU1;EPS8L2;EDA2R;PEX6;ZDHHC9;TCN2;WDFY4;NRROS;STK39;FAM134B;COL12A1;ACP2;ADAMTS13;N…
SPTAN1	122	FKBP15;PRKAG2;CD34;CDO1;STXBP6;L1CAM;UBXN11;CLIP3;SAMD14;FNDC5;FMNL1;GNG12;MAP3K5;PSD3;HMG20B;FMO3;FAM19A5;SLITRK2;TRIM29;CAMK2G;RAMP1;SCG2;LRRC4B;ABLIM1;GPATCH4;ABHD5;PTPN18;EMILIN1;KCTD15;CSF1;FBXL6;ANGPTL5;STARD9;MID1IP1;STARD4;TNFSF13;RYR2;ALDH3A2;GNAO1;NOVA1;BPIFB4;MAMDC2;RNF180;ZNF853;PEG10;SOX12;PAMR1;YARS;HNMT;PPP1R14A;KLHL36;RASL11B;UNC5B;SMYD2;ITPR3;EPS8L2;PMP22;RBPMS;ZHX2;LRCH2;EPHX1;A…
CCND3	115	BCL2L1;FAM160A2;FAM198B;RPGR;MLEC;EPB41L4B;BGN;RASAL2;DGCR8;TRMT13;MAP3K6;EML4;ANKMY2;NEXN;MAGI1;PHC2;EDN1;LBH;SCN4B;CDKN2C;ZMYND8;ISM1;ENPP2;FAM69B;SPRED2;ABLIM2;USP31;ABHD6;ADRA1B;INPP5D;SOCS2;FBXL7;ARHGAP10;STARD3;ARHGAP18;DMRT2;DOCK9;MYRIP;CDYL2;ARHGAP6;LAMB2;TMEM132C;KIAA1324L;MAML2;MAML3;RHOB;PJA1;MAP1B;FAM102A;PLCB4;LNX1;LRMP;HADH;FAM162B;GABRE;AGFG2;MDFI;FARS2;PAG1;MYO1B;SH3BP4;HSD17B11;G…
LSP1	112	FAM198A;FXYD5;ADD3;NISCH;ADA;CD37;CHI3L1;TMEM102;DBN1;MRC2;DHRS9;NDST2;FGR;ADRA2C;PSD3;PLA2G7;TPPP3;PTBP3;DMTF1;LIPA;TM6SF1;FLI1;KCNAB2;SH3BGRL;SLC15A3;ATG2B;SETD5;PAFAH1B3;FGFR1;C19orf59;BMPR2;WNT2;TMEM47;ISLR;HIF1A;DENND4B;BAZ2A;LY86;TNNT3;ADAMTSL4;THBS3;TMEM86A;NPC2;CRMP1;PROCR;MAP1A;LMX1A;FGF9;GRN;ADAT2;RPS6KA1;PMP22;RBPMS;ESAM;SORT1;GFPT2;MATK;GAS7;ADAM33;TREM2;ADPRH;POFUT2;A2M;PODN;ALCAM;TB…
KIAA0040	110	AOC2;FADS3;CLMP;FAM198B;KCNB1;CAV1;FMNL2;PTGER2;TESK1;DENND3;FMOD;SCN4A;MBNL1;PPP1R16B;ABCD2;NPR3;DAAM1;TSC22D3;EXTL3;TNIP1;BRD8;SMARCD2;BMX;ABHD5;ALDH1L2;SPEN;TLR4;STC2;UNC119B;ANO6;NFKBIA;GAB2;ADRB2;SLC29A2;CTIF;KIAA0922;MAPKAPK3;SERPINE1;YPEL2;MKL1;GUCY1A3;PIK3R1;SNX33;RBFOX2;TICAM1;MAN2A2;GATSL3;TK2;INSIG1;TMEM64;GJA5;SH3TC1;SDC3;GNAZ;ELOVL5;OSER1;BAG3;KLHL26;TLE2;ZFHX3;FABP4;FAM46B;SPSB1;IRF…
MTUS1	95	FAM198B;TIMP3;MFGE8;TUSC3;CD34;PPIL1;CHN1;MPP7;EML4;CCDC93;CAPN7;PLXND1;TRIQK;WRN;ALOX5;BRD8;SMARCD2;SNAI2;CENPV;THOC1;HRC;DNAJA4;APP;AKAP9;RNF182;ELK3;UTRN;TMEM43;DMRT2;HSD17B11;RRAGD;SLC7A2;ANO1;SLC29A2;TRIB2;ARHGAP6;NID1;IGF2;ERP27;TSHZ3;IGFBP2;GATSL3;IGFBP7;KIAA0040;GIMAP4;PHLDB2;RPS6KA2;CD93;SHISA3;NXPH3;COL4A1;MYO1B;ITIH3;ZNF704;MCTP1;CNR1;P2RY14;TMEM204;TGFBR2;LAMA2;KIAA0430;LRRC8A;SH3RF3;…
RXRA	94	DHDDS;TM7SF2;CPE;UQCRQ;PTK2B;LDLRAD4;RASAL2;SEMA4F;PLVAP;SLC35G1;GPR180;ARHGEF3;CUL7;RGS1;C20orf24;IRF2BPL;KCNAB2;TEX261;MYLIP;TSPAN7;SNAPC4;CENPV;CACNA2D1;CCND1;TRAPPC5;C10orf128;ANGPTL1;CYTIP;TUBE1;PTRHD1;ACVR1C;ZNF691;RASSF4;TRAF3;TRIB3;CHIC2;ATPIF1;ADAMTSL4;ZBTB38;ANGPT1;FLYWCH2;CDK5;DCHS1;EPHB6;MAN2A2;TP53I3;ZBTB10;KIAA0040;GRN;GART;ZFAT;HADH;TNFAIP3;POLE4;ZNF428;RCAN2;DRAM2;TMEM14A;GAS2L2;S…
DGAT1	94	PGAP2;CPD;CCRL2;ANP32E;RARA;NAALAD2;IARS;WDR1;LRP3;IRF2BPL;RAMP2;SERPINB8;PHGDH;SH3BGRL;THOC1;GYPC;SETD5;TREH;C10orf128;ECHS1;ACE2;KDM5B;CCDC115;RCCD1;ACVR1C;PNISR;MAMDC4;ZNF692;C12orf5;RIT1;SLAIN2;FAM13A;CHD1L;PPARGC1B;C10orf54;MYD88;RNF44;KIAA1107;GALNT7;ANKRD28;EDA2R;CASKIN2;ESAM;ELOVL1;COX14;FAM134B;TMEM88;SESN1;ACP2;SESN3;SLC4A4;NCKAP1L;ME1;TXNIP;MEOX1;STAT4;ADIPOR2;NR2F2;WDR27;ABRACL;LFNG;T…
IL17D	89	TIMP2;CDO1;MFAP4;FBLN2;S100A13;KITLG;DCN;FMNL2;FNDC1;NTRK2;FSTL1;FMOD;FADD;SCN4B;WDR66;IRX3;TRIM29;SHOX2;NMT1;TSPAN8;MAN1A1;RNF19A;BMP4;MAGED1;EIF4G1;MASP1;FBXL7;KIT;ANGPTL5;VIT;CD1C;PCED1B;RASSF5;RASSF4;HDDC3;LZTS2;GDF10;TMEM121;SSC5D;TP53I3;HERC5;CORO2B;COL16A1;CHST7;LRIG3;MAOB;ITM2A;MGP;GAS1;IGFBP6;RPLP2;CBX6;SPSB1;CYBRD1;DACT1;MDK;DRAM2;PENK;LRP4;OMD;ABHD5;IL16;PARD3B;EMP1;LPAR1;AMOT;CEP57;MY…
CLSTN3	87	SYNPO;CPD;SIDT2;HIPK2;PMM1;ADM5;GRINA;ENPP2;BCAT2;APRT;C7orf41;ABLIM1;IQCJ-SCHIP1;USP36;TCF7L2;EGFL6;NDRG4;NIT2;HSD17B10;ACADS;ALDH3A2;GLIS1;ALPK3;MAPKAPK3;YPEL5;CYGB;B3GNTL1;PPARGC1B;ZBTB38;CLUH;IGF1;TRABD2A;GIMAP8;MOGAT1;PTPN3;FGF1;PEX5;SDC1;DNAH9;C17orf59;SNCG;ELOVL3;RBM20;ECHDC2;MFNG;PDE3A;KRT79;NPHP4;PANX1;PELI3;ASPH;HBEGF;FGF12;RXRA;ITGA5;DLL1;C10orf90;NEK6;LTV1;COLCA2;RARRES2;AGPAT9;ACVR1;…
SMTN	86	TMOD1;SPRED2;MFAP3;FDXR;MROH7;CLSTN1;PROX1;MICAL1;PYGB;SLC26A10;CCNL1;WNK2;RAMP1;CAMK2B;IFRD2;CENPW;THOC1;RSPO3;CXCL9;GPM6A;SYNM;DIRAS1;DOCK3;DES;BCHE;FZD10;FAM189A2;PKHD1L1;KHSRP;KCNMA1;CAP2;PPP1R9A;CDC42EP1;TFEC;COL4A6;HOXC13;EFHC2;ARNT2;RBPMS;BTK;HDAC7;FABP3;CSDC2;ASPG;CTPS1;SPARC;PPP1R12A;MAPK4;PNISR;RNF150;LNP1;LRRC8A;TMEM252;TMEM9;C15orf41;CKMT2;NTS;TRAM1;GATAD2A;MYO10;PFKFB2;STAB2;TEX30;RO…
PSAP	86	DOLK;FAM213B;NISCH;MFAP4;MFNG;NHLRC3;TRMT13;MUM1;PPT1;SMG9;APBB3;TTYH3;PLXND1;LYN;DMTF1;IMP3;FLI1;IFI30;CYYR1;MON2;SGK494;GMIP;SLC15A3;GIPC2;SETD5;PAFAH1B3;NPL;C1QB;HPS6;BST2;TMEM42;SLC7A6;ADORA3;KIF26A;SEPT9;B9D2;COPZ2;BMF;MAML3;EFEMP2;UAP1;HOXB7;DCUN1D4;GIMAP6;FRMD3;FAM78B;FRAT1;STK36;CLK4;NRBP2;NCF2;EHD4;FAM168B;DSC2;STXBP2;POFUT2;GART;GPR146;SPI1;ZNF629;TBC1D2;CACNB4;VSIG4;GALNT13;CADPS2;LMO2…
MAPKAPK3	83	ANKRD53;EGFLAM;ANO8;PPAP2B;ANTXR2;ALDH3A2;CPD;RAB6B;GNG11;PTPN3;GLUL;SRBD1;STAC;PDZK1IP1;IKZF4;SEPT4;IGSF8;BIN1;NCOR2;PHLDA3;GNAI1;YPEL5;FAM110A;SYNE3;PLEKHF1;ASAH1;ADAMTSL4;AMN;ZDHHC14;SLC1A7;PPM1L;ESYT1;APBB2;BRPF3;PHYHIP;PIK3R1;SLC1A3;SPG20;PYGM;DGKD;ESR1;CENPO;CDKN2C;ALPK3;IGF1;PODN;NINJ2;ENPP2;PRMT7;TSPAN3;GPR64;LPL;SULT4A1;IGFBP5;CNTFR;SIDT2;MARC1;FGFR1;ADCY5;FHOD3;SMPD3;ORMDL3;BMP1;ADCY3;C…
ARRDC2	80	PHPT1;EPB41L1;SNAI2;TSC22D3;CUTC;UNC119B;NFKBIA;CLMN;NDNF;CAT;OLFM2;IFNGR1;RHOB;CBX6;SEMA6D;NUDT8;SERPINE1;MKL1;KLF11;GPAM;ADIPOR2;SLC29A2;MLLT4;C20orf112;PLOD1;ASPH;FILIP1;ITPKC;C19orf80;ZFP36L2;EDN1;TLDC2;VGLL4;GDF10;C10orf10;ART3;TEX30;DDIT4;CSK;SLC38A2;CDC42EP3;MGLL;PDIA5;LRRC17;CDC42EP5;GYS1;MCM6;TRABD2A;DLL4;SMARCD2;ACLY;ALDOA;INPP5D;CYP4X1;ABHD5;LGALS3BP;BACE2;CA8;ERRFI1;SLC40A1;FAM162B;PP…
THRA	78	PHF15;AAAS;FAM213B;RNF38;FAM168A;PEAR1;SLC6A9;FOXO4;KIAA1462;VASH1;ZMAT1;RPS6KA2;MMEL1;KIAA1522;PFKFB1;DENND4B;CCR7;S100A13;ADRBK1;NEURL1B;MKS1;PPP1R3E;TRMT13;SRPRB;DLG4;RRP9;PLA2G6;SUN2;CPNE2;SOX12;ST6GAL1;ADAMTS9;RGP1;ODC1;AQPEP;FHL3;PPRC1;CDCA7;RBM14;FBXL19;PLXND1;B4GALT2;UBL4A;CBLB;CLUH;CCDC39;PAN2;NCK2;ISM1;CCDC102A;KIF26A;PREPL;ARMC8;LRMP;EFCAB13;DUSP16;ING2;AXIN2;SLPI;RCC1;PLA2G16;GALK1;GI…
SBNO2	77	BCL2L1;UGCG;TMEM37;ADAMTS9;KIAA0232;HIPK3;DARC;CASP12;SPNS2;ATP11C;NGFR;ATP9A;CBX7;NIPSNAP3A;CMIP;DACT1;CDC7;ZCCHC24;ETS2;SRSF7;CD99L2;CYP1B1;PPFIA3;RGS16;PLEKHF2;CDKN3;SLC39A14;C10orf2;DUSP23;KLF6;IFI16;ZNF436;PIK3R3;FAM110D;FAM129B;SP110;ADM5;MYC;FURIN;B4GALT5;GPR85;GCA;MIDN;PPRC1;WDFY1;LRRC8C;TLL1;CCDC71L;MYCT1;RHOU;RUSC2;TSPAN1;SH2B2;FES;BCOR;RELB;USP31;TMEM2;GATA3;SLC25A27;LYPLAL1;ZMAT1;ADRA…
BCL6	77	OXNAD1;EGFLAM;IGIP;ANO8;ACVR1C;ANTXR2;TRAK2;PAG1;EPB41L4B;EPHX2;PHLDA3;PTPN3;RCSD1;IFNGR2;ELF1;IKZF4;CPSF4;CLSTN2;ZFAT;LOXL4;RASL10B;ADAMTSL4;GLDN;PCDH18;HAUS4;GNG11;TJP2;MAP3K5;BRPF3;NOD1;CISH;NHS;SLC12A2;TPCN1;HEMK1;XXYLT1;C3orf18;CDH6;CENPO;LRP11;NPR2;LRRC8A;LONRF1;ST3GAL4;PTGER3;DIRC3;MFSD6;IRF5;MGAT3;EDEM2;RIT1;ATP2B1;SLC41A1;TMEM2;SYNE3;MTERFD3;NEXN;CHST7;ORMDL3;BCAR3;ADCY5;PLAGL1;BMP2;BMP1…
ABI3BP	76	ELANE;ABHD17C;CD70;CUTC;LRP4;NOVA1;TEX30;CD34;CYP4B1;ECM1;DCLK2;CD4;ALOX5AP;CBX8;FBLN2;PCDH7;CLSTN1;SPTBN1;RGMA;SLC38A11;FAM180B;FCER1A;SERPINA5;SCARA5;ZNF438;FMNL1;SELPLG;MRPL46;UNC5B;TPPP3;HRC;ZFHX4;MYRF;DUSP6;DNMBP;MPDZ;HSD17B6;GDF10;LTBP4;SLC38A1;TRIM29;MTSS1L;CD44;RHOBTB2;SAMD14;CENPA;FBN1;EBF3;ZFHX3;RHOBTB1;VIT;ZEB1;ROR2;CHST7;HENMT1;SCG2;SNAP25;LRP1;OMG;BMP2;KCTD15;KCNIP3;CFD;SLC17A7;CSF1;…
DDX17	71	C16orf74;DOLK;CTTN;LMBR1L;ZNF224;SESN3;FUBP1;C14orf28;RIT1;C15orf39;PLEKHO2;ERF;KLHL26;ARFGAP1;RASIP1;FAM13A;UFSP1;B9D2;RARA;ZFC3H1;BYSL;RPRD2;ARAP1;BHLHE40;GADD45B;CTSO;JUN;CSRNP1;FAM219B;AHSA1;RASA2;PPRC1;PHF23;ETNK1;ZNF574;UXS1;ZNF248;KIAA0430;LYL1;CALHM2;AC139100.2;SEC61A1;RALGPS1;ZRANB2;PPP1R10;TP53INP1;SERTAD3;SGSM3;ZBTB21;SLC25A25;ARGLU1;CCDC9;SETD5;PDE8A;FAM193B;KLHL9;ZDHHC16;EDA2R;MEPCE;…
TSC22D4	70	SCN7A;TOX;LCNL1;ADD3;B4GALNT1;B4GALNT3;SORCS1;EEF1A2;MLIP;RTKN;DCLK3;DOCK5;SOX8;PMP2;SLC2A1;PLP1;CHL1;C2orf88;KIF19;NCAM2;CYB5R2;NRBP2;GAS2L3;NEK1;DDHD1;MT3;TMOD2;SHISA6;NCAM1;RBM11;HSPA12A;PRIMA1;RELN;AURKB;PPP1R9A;TNNC1;BCAS1;MBP;SORCS2;FAM19A5;DHH;ITGB8;TMPRSS5;RXRG;COL9A3;PAQR6;PAK3;TNNT2;C19orf33;AATK;DUSP15;PPP2R2B;SEMA7A;PTPN5;NKAIN4;BRSK2;SFRP5;SLC25A48;NRXN3;AK5;LMO7;ANGPTL7;CBS;SECISBP2…
MSR1	68	TNFSF13;RECK;ANKRD13D;RBMS3;LYVE1;TREM2;ELANE;CD36;SELPLG;CD4;CD300LF;FABP4;ALOX5AP;CCR5;CHI3L1;MAPK13;LTA4H;F13A1;ARL4D;ARHGEF1;GPR34;TMED5;MARCO;RAVER2;PLA2G7;SPP1;ATP13A3;ZMYND15;FNDC1;MAP4K3;ADRA2C;PSD3;PALMD;GUCY1A3;TREML1;CD200R1;SPOCD1;MRPL46;VSIG10L;LTBP2;IL1RN;MAF;CTSD;AQP9;MTSS1;HERC5;ZFHX3;GATA6;TRABD2A;KCNQ1;ZEB1;ABHD5;RAB20;FAIM3;ALDH1L2;MPPED2;C1QA;ABCC1;FRAT1;ANGPTL5;SQSTM1;NTM;FOL…
UBTF	68	MRPL27;IFFO2;MYSM1;MFSD8;C4orf21;CTC1;SMAD6;SUFU;EPHA2;CDR2L;DOLPP1;SLC25A36;CC2D1A;BCL9L;CLPB;PAXBP1;ZZEF1;SOX18;PRICKLE1;LDOC1L;PELI2;SOX12;KHSRP;P2RY11;ADCK1;MICAL1;IRF2BP1;RICTOR;KIRREL;ZCCHC3;BRWD3;DUSP7;S100A6;AJUBA;C5orf42;XRN1;CISD3;STARD9;TMEM123;MTSS1L;QRICH2;TLDC2;MFSD5;PARP2;RSG1;MGAT2;UBTD1;MON2;SH3GLB2;IFRD2;S100A4;ARGLU1;NR2F6;CENPT;ELFN1;SLC39A6;KLHL9;AP1G2;MTF2;NOC3L;CCDC84;TCIRG…
C7orf41	66	BAG3;ZNF334;NPY1R;DMD;KRT5;ACVR1C;NRSN2;GLIS1;ZNF219;RIC3;PEX19;FAM109A;MYL5;C15orf59;CTIF;LSMEM1;RB1CC1;GLS;NDRG4;ENOSF1;P2RX6;PLXNB2;HFM1;ASAH1;JMJD4;SPR;SMO;FAM110A;FOXRED1;FAM229A;HIST1H2AC;CUL7;CTC-429P9.4;RMDN2;TXNRD1;PPP1R1A;MACF1;EPHB6;C20orf24;HADH;RTN1;SLC24A3;SIPA1L1;CLPTM1L;VCAM1;USP15;PTPN3;CLU;FADS3;CACNA2D1;ZNF629;GINS3;ANGPT1;ACYP1;NME3;TMEM52;D2HGDH;GPR64;PLCG1;TTC36;PARD3B;MBD2;…
RGS3	64	SLC6A2;EGFLAM;ANO8;NR3C2;CPEB4;EPB41L4B;GAB3;NOTCH1;GPER1;GLUL;SLC39A14;MAGEE1;LAMB1;PPAP2C;CBX2;KLHDC1;CDC37L1;TEK;ZDHHC14;CABIN1;FAP;MAP3K1;GSAP;NR2F2;BRPF3;STARD5;LSR;CISH;NHS;TRAK2;CDNF;HEMK1;NEURL1B;MATN2;LYL1;ATP10A;SLC13A3;EFEMP2;KCNAB1;MRGPRF;CYYR1;TSPAN3;RBM5;VEGFA;GIPC2;MARC1;FRMD3;FHOD3;CHST15;LINGO1;BMP1;LRRC17;TPST2;CYB5A;C10orf128;BBS10;PRR16;NRROS;GIT2;GUCY1B3;MMD;PLAGL1;NRBP2;ARHG…
PXN	64	CCNL1;CTTN;FAM168B;HDAC4;SGK223;FNBP4;GSTA4;PNISR;CELF2;PCOLCE2;TENM1;FAM213B;SRSF11;S100A13;PAXBP1;A2M;CORO6;ZFC3H1;FAM180B;CENPT;LRRK2;PLEKHF2;CALCOCO1;MYH9;PEAR1;THBS3;SEC31B;STARD9;ZNF574;PML;DUSP7;LZTS2;DMTF1;FGF14;ANXA1;ODF2;PHYKPL;CCDC39;RUFY3;BST2;UAP1;ZCCHC3;LGALS8;ARGLU1;ITPR3;CXCL12;KLHL9;BDKRB1;SREK1;SEMA3C;ACYP1;OGT;SRRM2;NOC3L;ZNF362;TNFAIP6;C17orf59;CHRD;EMP1;STK38;ABCC5;GFPT2;CLK4…
F8	61	EFNB2;PHF15;CIDEA;CPD;SPARCL1;NDNF;SULF2;GPER1;GIMAP4;FABP4;ARL15;SLC25A30;RAB2A;AFAP1;PLVAP;LBP;GPR146;TEK;TUBE1;TRIQK;TIAM1;S1PR1;MAP3K6;SH3BP4;RGS5;ITPKC;C19orf80;TNFRSF8;FAM171A1;SLCO4A1;HAS2;TMTC2;IFITM1;CSK;ENG;SPAG4;MAN2A2;CYYR1;GIMAP8;ARRDC2;ALDOA;FRY;GIMAP7;ST6GALNAC3;PTPRM;FRMD3;EPAS1;INPP5D;OSBPL1A;APP;MCC;GALNT18;CMTM8;RNF144B;PTPRB;TMTC1;BAIAP2;BCL6B;PTPRK;LRRC32;CCDC85A
SGCE	60	RECK;ELANE;SLC17A7;PPAP2B;LYVE1;NOVA1;OLFML3;DCLK1;ECM1;RNF180;SLC4A4;ADAM12;LTBP4;RUNX1T1;STAC;PAM;FBLN5;DACT2;RAB3IL1;ZNF385B;WNT10B;TREM1;NT5E;ITM2A;ROR2;INHBA;PEG10;HMGCLL1;PPP1R9A;COLEC12;RGMA;SPOCD1;RASSF3;EPB41L2;WNT11;LMX1A;NHSL1;PRKAG2;GPC3;EBF3;SYNE1;MMP27;CXCL14;WSCD2;SCN4B;OMG;IRF4;ROBO3;PLEKHG5;DKK2;CHN1;TNFAIP2;ANK2;PCDHGC3;GFRA1;ABCA8;FBXO32;PFN2;GAS7;COL6A6
PCOLCE	59	KCTD3;LIN7A;TMEM74B;LUM;MMP14;HSPG2;ECM2;PDGFRL;MFAP4;HDC;C1orf21;MYO1D;LAMB2;LUC7L;HPGD;ULK1;TMEM150A;MRC2;DLG4;SELENBP1;MKL1;IP6K2;GSE1;UBALD1;GLT8D2;TNS1;PARVA;PI16;PROCR;FGD6;COL4A3BP;CCDC71L;ZNF189;MAN1A1;LGALS3BP;TIPARP;SATB1;C1orf54;HEPH;F10;C15orf41;SERPINA5;ENKD1;SCN4B;SFRP4;PTPN13;CCDC80;COL14A1;MASP1;ABI3BP;PLXNA4;ZDHHC9;GPX3;OGN;NTM;ATP1A1;KRT10;GORAB;RNF146
TLN2	59	CD53;WBSCR27;ANKRD53;KIAA1462;TMCO6;SIDT2;PTPN3;CHN1;DUSP23;MCTP1;SEMA4F;SCML1;NPTN;ASAH1;ADAMTSL4;DYNC1I1;POFUT2;ANTXR2;CRY2;CCDC93;MTR;GMDS;RBM14;STON2;PRMT7;MAP1B;WDR4;ACSS3;EFS;HOXB7;RTN2;CYYR1;TEX261;MMP28;C10orf90;GART;GIMAP7;UTRN;TPCN1;TM6SF1;CCDC107;IRF4;PTPRK;CD163;PRRG3;IRS2;RGS19;HAGH;PALLD;POLE4;ABCA3;TSPAN7;ZMIZ2;PTPRM;TMEM8B;MMP2;GPSM3;AGPAT9;COL6A6
PRKAG2	58	SLC4A2;ACADVL;PPAP2B;SPOCD1;OLFML3;C14orf28;ADRA2A;FRMD4A;GOLT1B;FOXO1;ABAT;C1orf21;PNMA1;SLC38A1;ARL4D;MSC;MAFB;MYL9;WDR1;CCDC107;LGALSL;SH3KBP1;TNFRSF12A;DHRS3;USP35;CISH;FOSL2;SCN4B;FEM1B;PPP1R12A;NEXN;PRKAB2;RALGDS;TTC38;EFNA5;NCS1;RHOBTB1;RAB23;EBF1;IL1RAP;CHST2;CXCL14;TMBIM1;TXNL4A;LRRC4B;PKD2;D2HGDH;GLUL;RNF180;KLHL42;BTC;MGAT4B;SORT1;FABP4;RIMS3;PRDM8;H2AFJ;MLPH
ATP2B4	58	RYR2;PGAP2;AFAP1L2;PRKAG2;KANSL1L;MLLT1;MYL6;WFDC1;SLC38A1;MROH7;PHYHIP;PPP1R12A;QKI;CASQ2;ATP13A3;KHSRP;MPP7;KCNMA1;CAP2;NTRK3;GARNL3;MAPK4;REEP1;ZNF521;KCNIP3;DGKG;MID1IP1;LNP1;RBPMS;IGSF9B;DLD;KCNQ4;METTL24;SAMD14;PRKAA2;MTPN;CFL2;GATA6;DECR1;ZEB2;SH3BP4;RPS6KA2;RAB9B;HSPBAP1;ERLIN1;KCTD14;TBC1D16;ARHGEF9;GRIK5;MAOB;MRPL46;KPNA1;C9orf72;NXPH3;KAT6A;NFIX;PDE4D;NCALD
CTSF	57	RNF38;FAM208B;NOVA1;PPRC1;RASSF7;ZMAT1;POGLUT1;CCNG2;ADHFE1;DCAF15;SPSB2;CD99L2;ZNF10;GSN;APOD;NOL6;RHEBL1;OGFOD2;WISP2;TCP11L2;FXYD1;SREK1;DVL2;SOBP;UBALD2;CREBRF;ATG9A;FANCI;NPR1;XPO5;RCC1;BYSL;CKAP2;TP53INP1;MCM2;PTPRS;GALNT7;KIF3C;SLC43A1;CIDEA;ABTB1;PROK1;MXI1;CFD;MAK16;STX10;GPX3;EBP;HES6;MYBBP1A;GABRE;ACLY;ZNF395;DEDD2;ECHDC2;DDAH2;NXPH4
DDX5	56	DOLK;KLHL25;LMBR1L;SESN3;RRP1B;PPRC1;DOCK6;C14orf28;ZFP1;TXNIP;ARFGAP1;CTIF;LSMEM1;BBC3;FAM13A;BYSL;WDR43;YPEL2;TWIST1;C10orf2;MAMLD1;SPARC;CITED2;B4GALT2;ZFC3H1;STK11IP;MLYCD;ZNF248;STK36;ST3GAL5;CTSO;FAM214A;HERPUD1;ZNF22;SLC24A3;PPP1R10;SGSM3;SLC26A6;URB2;PLEKHO2;RPRD2;GARS;MIDN;RWDD3;CCDC132;UBA7;PPAN;CLEC2B;LCA5;SEC61A1;FRAT2;PLEKHA7;VPS13C;FBXO32;TP53INP1;MAK16
COL1A1	54	KCTD3;IGF2;SESN1;HCFC1R1;ECM2;BGN;MAP2K3;CPZ;MIB2;COL3A1;FBLN2;PYCR1;LAMB2;LUM;LOXL1;APOD;DLG4;ASPN;FNDC1;IGSF10;SLC22A17;WDR27;RGS6;OGN;GLT8D2;THY1;PI16;TBX15;CTDSPL;G0S2;FAM214A;TSC22D3;EFEMP2;MRC2;MRGPRF;CLEC11A;SPARC;KAT2A;RARRES1;IP6K2;SFRP2;SEC11C;TMEM64;PTPN13;ENDOD1;CCDC80;COL14A1;ACSL5;RUNX2;GPX3;CREB3L1;LRRC17;GORAB;WDR81
TXNDC5	54	FXYD5;PCED1A;NR3C2;CPEB4;KIAA1671;EPB41L4B;CCDC68;LIMS2;LAPTM5;HSD17B11;DAB2;ADPRH;KL;TMEM132C;COMMD8;SORBS2;TMEM14A;TPD52;POLD2;CISH;NTN4;ZYX;XPR1;C3orf58;ARHGEF12;WDR1;ENG;FLI1;WARS;IFI30;C12orf5;TSPAN2;TSPAN3;TIMP3;SGSM3;RTN2;IGFBP4;DACH1;MFSD6;ABHD6;FRMD3;KCTD12;SFRP1;ORMDL3;FBXL3;CEPT1;ADCY9;GNAZ;CD2AP;PALLD;SHISA3;MMP7;PLAGL1;CTTNBP2NL
PPP1R14A	53	PTH1R;LGR6;HSPG2;PLOD1;CDYL2;ITIH3;OPN4;ARHGEF10L;CARNS1;CSDC2;LOXL2;COPZ2;PLEKHF1;CASQ2;MPP3;MYH9;SIX2;PCP4L1;LMCD1;SPARC;ARHGDIB;OBSL1;C16orf45;DLX5;RERGL;PCCA;IGSF9B;SH3RF1;RSPO1;CDC42EP5;IGFBP2;TACSTD2;NFASC;SMARCD2;SNAI2;PLA2G4A;PDE8B;PRDM16;CORIN;AKAP6;PROSER2;AKAP1;ALDH1L2;GRIK5;ANPEP;STON1;LRRC17;SPEG;STC2;AMIGO2;NPY2R;CKAP4;SLC29A2
RPTOR	53	AGL;DIRAS1;AFAP1L2;CKB;NDUFB7;GNAO1;PRKAG2;TEX30;IFITM1;RNF180;JPH2;P2RX1;TYK2;LGI1;FAM13B;MROH7;CMIP;CTXN1;ITGB1BP2;ASB2;NCALD;TMEM35;KHSRP;MPP7;KCNMA1;CLSTN1;ETNK1;ITGA1;LBH;VPS13A;EPM2A;KIAA0430;HSPB3;WNK2;KCNQ4;FAM129B;MAPK4;CYTL1;MSX1;UQCRQ;SHROOM3;RPS6KA2;RAB9B;HSPBAP1;ETV6;WDR54;CCDC81;KCNH2;CD93;CABP1;NOTCH3;WIPF3;TBC1D16
CALM1	52	MFAP4;FAM198B;C1orf122;SLC6A6;FXYD1;HRSP12;MLH3;ECM2;IGIP;MASP2;CLTCL1;SERTAD4;LUC7L;P2RX6;CACNA1H;OBSL1;COPZ2;BMF;CALM3;ZSCAN18;C20orf112;ASPH;TIAM2;MGP;DMPK;PIWIL4;PACSIN2;MAPKAPK3;JRKL;PTPRS;CHRDL1;TBL1X;ITGA5;LGALS3BP;PPP1R10;TRABD2A;ANG;GMIP;CLU;CYP4X1;MAN1A1;BMP4;ALDH4A1;PRDM11;EIF4G1;CYP2E1;SMG9;SNCG;LDLRAD3;CLK1;KIAA1239;FAM166B
ITGA1	52	FARS2;EPHX2;SCFD2;SGK494;HS2ST1;CHPF2;STXBP6;DCLK1;NOC3L;SIDT2;ERF;AKT3;ADAMTS15;RNF38;SH2D3C;TMEM121;CBX4;A2M;SLC52A2;LHX6;EXOC6B;MLLT4;FAS;ADAMTS9;NAV2;TMEM204;DOK4;MINA;MTMR3;TSSC1;C3orf58;EPB41L2;LRRC8A;C2CD5;CPD;MFSD5;FAM212A;MYSM1;BTAF1;HSPA13;PRKCE;RASGRF2;FAM43A;ESR1;PCDH1;COLCA2;PELI2;H2AFX;GEMIN5;TRAM1;ATXN7;EGFR
IPO11	51	STARD13;MFNG;PPAP2B;FAM168A;NOVA1;TSPAN13;DCLK1;ZFHX3;VDR;BAALC;TAL1;ARL4D;NAALADL1;ZNF644;MGAT4B;TRMT13;ARAP3;NAA25;FAM208B;ICA1;TTLL10;PIK3R1;TGFB1I1;PPP1R16B;FBXW7;DCHS1;LTBP3;EXTL3;ELTD1;EFNA1;RHOBTB2;SBK3;GIMAP6;TSPAN9;ST6GALNAC3;KIFC3;ARNT2;SREK1;WDR54;ZC4H2;GJA5;TUSC3;PPAN;CFD;CYP19A1;GNAZ;PDE2A;ZNF792;CTNNBIP1;ATXN7;ZBTB21
TSC22D3	51	KLHL26;LIPT2;ACD;CDKN1A;HSPG2;SLC7A2;ITGA5;TACC1;LIMS2;MFAP4;SELENBP1;ARHGAP6;RASAL2;C10orf137;CNR1;TENC1;COPZ2;CLEC3B;ZCCHC14;MAP3K6;SPARC;ANKMY2;SLIT3;FOSL2;HCLS1;FLYWCH2;FAM188B;PACSIN2;HSPB7;PLBD2;SH3RF1;CRYL1;TRIM25;B4GALT1;GATSL3;HERC5;SMARCD2;RHOBTB1;PPP1CB;TICAM1;ALDH4A1;BMP2;PIP5K1C;SLCO4A1;SH3TC1;FAM107A;MPP3;STX12;ARHGAP10;MEF2D;TIPARP
ADAMTS9	50	RASIP1;ANO6;NAP1L5;C15orf39;KCNK5;SPRY1;NR4A2;MCL1;GRASP;NDRG1;CMIP;B3GNT5;SRSF7;ADAMTS1;CHD1L;C6orf106;ESYT1;ETS2;HBEGF;INHBB;PIK3R3;FOSL2;ALDH16A1;PRR26;IVNS1ABP;N4BP3;C9orf40;JMJD1C;HOXB6;FER;PLEKHO2;PELI1;THBD;SETD5;SNRK;USP36;ARL5B;SLC20A1;HLX;CA2;CFD;TNFAIP3;IL6;CASKIN2;CREM;ZNF792;EMP1;STC1;RNF122;CH25H
VCL	50	SSPN;AFAP1L2;PRKAG2;EPHA2;RBPMS;FRMD4A;MFAP3;NGFR;EHBP1L1;ITIH3;CMIP;DHX35;WFDC2;ZNF629;NCALD;MYH9;PEAR1;MLLT1;CTXN1;WNK2;RNF112;UCHL3;PPP1R9A;ZNF574;VPS13A;HSD17B6;ATOH8;ETFA;SLCO3A1;DPYSL2;NCS1;C14orf28;CFL2;CENPW;HMCN2;RPRD2;HRC;MLYCD;SELM;RPS6KA2;FHOD3;KCNH2;C7orf63;CSF1;SHROOM3;NOTCH3;UTRN;C9orf72;LZTS1;STK38L
ACOT8	50	ANKRD13B;AHI1;TPBG;SRSF11;TTC7A;S100A10;DBN1;PLP2;PAM;EXOSC5;KLF13;C12orf57;RARG;TRIM47;DNMT1;PPL;XYLT1;DPYSL3;TRAM2;DLGAP4;ZCCHC3;PRR16;ANXA1;VASN;ANXA4;ST3GAL5;DGCR8;PSME4;MRGPRF;ACAP3;FAM180A;CLCF1;ADA;PDCD1LG2;CXCL12;SLA;SEMA3C;SH3BGRL3;ORMDL1;ZNF503;CD109;PLSCR1;PPTC7;FAT1;RUSC1;JAGN1;GFPT2;SRXN1;EBI3;PXDN
TRO	49	AMOTL1;EPHX2;APBB1IP;SLC7A6;SMO;CTIF;USP24;PLIN1;PLA2G6;SLC35G1;JMJD4;TRIM8;DGAT1;BAIAP2L2;TMEM37;JUN;IRF2BP2;HOOK2;NOL3;ELMSAN1;ABCD2;ZNF438;PROCR;EPB41L1;TRAF1;NPR3;LIPE;CDH20;YKT6;SCN4A;PLCD4;GYS2;GPT;UNC119B;MARC1;MAN1A2;ZHX2;GJA5;PFKFB1;FAM166B;SLC16A2;SLC2A4RG;PTPRF;ZNF740;AGPAT2;MGAT4B;RGP1;HEPACAM;YBX2
CXCL12	49	KCTD3;SLC6A6;SMAD6;KIAA1671;CDR2L;SECTM1;TBX3;CPQ;FAM13A;NES;CLIC3;HEYL;CIB2;ABCB1;ETS1;IKZF2;PLS3;HEG1;LONRF1;PRSS23;ZNF189;CALB2;SLCO2A1;RAMP2;PPARG;MAP7D1;GPC3;DLL4;ITPR3;GALNT7;ELFN1;HEY1;LRP3;AIF1L;ADCY1;SERPINB8;ACOX2;ZNF503;MCC;RARRES3;CPB1;TENC1;ARHGAP31;ELOVL1;ACE2;TUB;YBX2;CCBL1;MYO7B
PNKD	49	MDFI;FAM168B;PCED1B;UNC119B;KIRREL;PHF19;PKMYT1;CCR1;HPS6;USP31;CBX7;S100A10;SAMD10;RNASET2;COBLL1;DENND2D;CAPN2;MKLN1;SPTAN1;ABCB8;FEM1C;S100A3;GBE1;ANXA1;ANXA5;CAV1;EXTL3;HMGA2;TBL1X;DDO;ACOT7;SETD5;FGFR1;BBS9;NPL;CHST15;GAREM;E2F1;HS1BP3;CLEC4G;SLCO2B1;LRIG3;ATP8B4;ATXN7;ZBTB20;S100A2;PHF3;TBC1D14;ZNF512B
ABLIM1	49	FAM213B;ADD3;ST6GAL1;RPS6KA2;CPD;KIAA1462;PDGFRL;MFAP3;TMEM102;TMEM255B;AFAP1;ATPIF1;MCTP1;GPR146;TMEM123;FZD6;ZNF385A;GNG11;TMEM245;TACSTD2;BMX;TMTC2;PDGFB;EPB41L2;ST3GAL5;WSCD1;HOXB3;UAP1;FLI1;HOXB7;CORIN;COL4A4;C11orf89;SNAI2;GIMAP5;GIMAP7;STC2;SREK1;BACE2;LPAR1;FAM43A;IRF4;LMO4;C17orf59;ABCA8;ZNF750;GFPT2;CRIM1;GAS7
NR4A2	48	NGF;RASIP1;RASD1;HR;JUNB;CCRL2;TRABD2A;GRASP;KIF19;CHD1;B3GNT5;KLF11;ADAMTS1;EGR2;EGR3;TFRC;FOXF1;KDM6B;EDN1;CLDN1;ATG9B;GBE1;TOB1;RAB20;NR4A3;BAZ1A;DLL1;ENO2;SKIL;BCOR;ING4;SIK1;THBD;C12orf44;MIDN;BACE2;ENO1;SLC25A48;CA2;SNRK;NRARP;RNF122;ANGPTL7;PIAS3;SSTR2;MRAP2;PDE4B;LRRC10B
MYH11	48	PTK2;TMOD1;AFAP1L2;NUAK1;DES;RIC3;ZNF10;CENPW;SYNM;SRSF11;SEPT8;FDXR;MROH7;PAXBP1;DAB1;ENOSF1;SRSF7;CPNE2;FAM184A;WNK2;PKHD1L1;MAGI1;LBH;PRKCH;PLS3;LRRC8A;SREK1;FRZB;RAMP1;BZRAP1;PCSK1N;COL4A6;HEXIM2;DACH1;HMCN2;SCML1;RSPO3;FAM76B;CYP7B1;NCK2;NTN1;NTS;NOTCH3;SHISA4;PTMS;TMEM35;TUBE1;GPR176
LAMB1	48	EFHD2;KLHL25;ANKRD13B;ZNF251;NOC3L;ZNF692;EPHA2;TBX3;SLC25A36;NRARP;FOXO4;DFNB31;C11orf96;DHX34;MEOX1;KLF11;PPT1;PLOD1;CACNB4;DENND3;WDR27;ITPKC;SLC7A6OS;FOXF1;PNISR;NTN4;ATAT1;KDR;NRROS;LONRF1;TSC22D3;FLI1;TCEA3;SGSM3;ARGLU1;ABHD6;FRMD3;TMEM63A;EDA2R;KCTD10;RAB24;LTV1;MAP4K5;EMX2;GNAZ;PRR16;LUC7L3;FAM117A
DIAPH2	47	PMAIP1;TOM1;PRKAG2;COLQ;C15orf38;CTIF;EPHB6;GLS;SERPINE1;HIST1H2AC;CAV1;FAM149A;MAMLD1;DNALI1;SPARC;GBE1;DMPK;DLX5;ARMC12;FEM1C;HMG20B;DCHS1;TRAF1;DDIT4;TBC1D14;TRIM44;MEF2D;UPP1;UBA7;SMTN;CCL20;ALDOA;FADS3;NOL3;ZMYND8;SOCS7;PPP1CB;MFSD10;IER5;ANK2;GNA13;C11orf68;CSN1S1;LPAR2;OSER1;STK38L;ABCA8
PET112	47	BAG3;KRT77;FAM198B;DMD;GIGYF1;AP1M2;OSGIN2;CYP4B1;MAP6;KRT5;ARHGAP6;MAPKAPK3;LOX;SPTBN1;P2RX6;LBP;FZD5;JMJD4;RGS5;MPP3;AFF2;PLCH2;NRCAM;CXCR4;TMEM178A;PYGL;CITED4;DCHS1;HSPB7;NPR3;PODXL2;ZNF334;PTPN3;KCNB1;UCHL1;STC2;PCDH9;RSPO1;RANBP3L;PPP1CB;NPY5R;CXCL9;NPY1R;EGFL6;GLYAT;ATP1A1;CYTIP
SLC2A4RG	47	STARD13;SESN1;GNPDA1;ZDHHC1;NOTCH1;DOLPP1;ANP32E;NTRK2;DCAF15;CBX4;ELF4;SOX18;CNIH2;SLC10A6;C20orf112;MNT;HOXA11;ODC1;PIP4K2C;NUDT8;XPO1;G0S2;DDIT3;ZBTB7C;SLC38A2;PRKCE;TLDC2;FAM47E-STBD1;MFSD5;SH3GLB2;ZNF827;ANKRD28;MIDN;SLC25A42;ARID5B;FAM43A;SLC3A2;TP53I13;SRRM2;SLC7A10;KCTD15;CBL;RFX3;STK35;MBD3;SIX5;COX14
DDAH1	47	AOX1;RNF38;MFGE8;CEP85L;MACF1;LRRC16A;CYP4B1;CORO1C;BAALC;SAMD4A;BAZ2A;GLS;THEM6;LOXL2;ZBTB17;LYPD3;CCDC107;ADAMTS2;CLEC3B;PALMD;ESRP1;NEXN;NMNAT3;FBXW7;HSPB7;MAP1B;ELN;KRT23;ILK;ZNF496;GANC;MAP7D1;C1orf198;HERC5;USP15;CYP4X1;RNF19A;ALDH4A1;AKAP1;CNTN3;EIF4G1;ROCK2;ANPEP;ARHGAP10;ZNF750;SNX21;IL17RC
USP2	47	PAG1;CCL8;NOP2;KIAA1462;AGA;ZMAT1;CCNG2;CCR7;PAXBP1;CHD1;NEDD9;TRMT13;TRIQK;MECOM;ZNF10;AVIL;PLOD1;GRAMD3;ZNF436;MAGI1;TGFB1I1;SPRED2;HAS1;HAS2;LRCH1;PPRC1;LRRC8A;ST3GAL5;PIM1;NAGLU;CLCF1;RASSF7;ARRDC2;USP31;FRY;FOXN2;INPP5D;TNFAIP6;ACKR3;PRR12;ANK2;PRR16;FBXO31;GABRE;GFPT2;AGFG2;SLC25A27
MOB2	46	B4GALNT1;HR;USP2;C12orf5;KHDRBS3;CPZ;SETD1B;C11orf96;ITIH3;SORBS2;SOX6;ARHGEF10L;CARNS1;SMURF1;TOB1;CASQ2;PLOD1;PDE3A;GUCY1A3;MAPK4;TBX18;SLC26A10;DGKG;NTF3;LTBP1;CAMK2G;IFI30;PPP2R2B;COL5A2;NFASC;MRGPRF;WFDC1;GPR20;HEY2;PRDM16;BACE2;MYOZ1;BRSK2;MUSTN1;GRIK5;UCP2;RBM24;AVPI1;SPEG;AMIGO2;HHIP
ZNF385A	46	CD52;ACP5;AUTS2;RASSF3;KIAA0232;TMEM252;LAPTM5;ST14;CCR5;TREM2;MSR1;SERPINE1;LY86;PAPSS2;CCSAP;TBC1D2;PLA2G7;TNNI2;SLC43A1;APOBR;TF;HTRA3;LIPA;PDGFB;ITGB2;ALDOA;STAC3;C1orf228;TTYH3;IFI30;KCNAB2;TNFRSF11A;GRN;SLC15A3;LCP1;C19orf38;BCAR3;RPS6KA1;GALNT12;PLD3;FAM166B;PLEKHF2;TFPI2;SPP1;SORT1;MATK
PEX19	46	KLHL25;FGFRL1;AOC2;GLIS1;CPE;ANO3;CCDC64B;PGAP2;TMEM25;ST6GALNAC6;CTIF;CD99L2;M1AP;ENOSF1;KLF13;CEBPB;GAS2L1;CLEC3B;ASPH;HSD17B8;GLI3;SCNN1D;C19orf80;LCN10;MAP1LC3A;S100A4;ANGPT1;C6;INTS3;C20orf24;KLHL31;MFSD3;TEX261;FBF1;SCRN2;ITPR1;HTATIP2;RNF19A;TENM3;CUL7;ORMDL3;E2F1;ZMAT1;NRIP1;ITGAV;ABCD2
ITPR1	45	SNRK;RASIP1;VEGFC;KIF26A;GMNN;CASP12;GRASP;AFAP1;KIF19;BIN3;PLVAP;RUVBL1;C6orf106;TLN2;TESK1;ETS2;INHBB;PIK3R3;GFRA1;DUSP6;CLDN5;RARA;DOC2B;NCKAP5;CTSO;GBP2;HOXB6;DLL1;TP53INP1;SLC26A6;THBD;APOLD1;STK17A;PLEKHG1;SEMA3F;HYAL2;LRRC32;TNFAIP1;EGFL7;CASKIN2;PRKD2;PDE4B;RNF122;HES6;CH25H
SMOC1	45	EPHX1;HSD17B10;IL20RB;TM7SF2;PSAP;GLIS1;PLP2;PMM1;NDRG4;CD9;ALDH1A2;NCEH1;CAPG;CEBPG;SERPINA5;ALCAM;SPR;PTX3;FGR;AQPEP;TNNI2;OBSL1;S100A4;S100A6;B3GALT4;APMAP;TRIM29;ACSS3;PRMT7;CTSF;IL17D;CTSZ;TNIP1;VEGFA;C10orf90;COL16A1;CYP4X1;NHEJ1;PFKFB1;HEXB;PARP12;SNCG;TTC36;ATP1A1;ZNF512B
SPIDR	44	CLDN5;UGCG;PNRC1;RASD1;GSTA4;CDKN1A;JUNB;SSFA2;DARC;C11orf96;DNAJC27;FIBIN;NPRL2;ABCA6;PPM1D;ADAMTS1;CEBPD;GADD45B;SOX17;CCDC71L;ITPKC;PIK3R3;S100A9;MYC;RGMA;HAS1;C10orf10;CTSO;C9orf40;CDC42EP4;SLC25A25;DYNC2H1;SBNO2;PTPRS;TNFAIP1;CSF3;IL6;ZFP36;NNMT;ABCA8;WDFY1;STC1;RNF122;HOXA9
PDLIM7	44	ITGA8;MYOM1;TMOD1;ACTG2;EVA1A;DES;RIC3;KIAA1522;MYOCD;SLC25A18;NLGN2;C11orf96;ITIH3;NTRK3;CLSTN1;ITGB1BP2;PYCR1;CTPS1;CASQ2;SOX12;MPP7;KCNMA1;NCAM1;KIRREL;REEP1;MYL9;SLC38A1;NTF3;FGD1;HEG1;TFEC;PDLIM3;BZRAP1;COL4A6;COL4A5;PCDHGC3;NIPSNAP1;CNN1;PCDH1;NYNRIN;RNF180;RBM24;ABCA5;CKAP4
AEBP1	44	EFHD1;RRAD;HSD17B11;HCST;TLN1;SEMA6C;PARM1;MYL9;LPHN3;DLG5;ZNF740;CALCOCO1;PDE3A;DNAJB4;ZNF436;HCN3;HCLS1;KSR1;DGKG;HMG20B;PACSIN2;CCDC39;TBXAS1;TM6SF1;RNF41;TEX261;CYBA;GOLM1;ARRDC2;TGFB1I1;GRN;NPTN;TAGLN;HSPA13;EDA2R;RAB23;PPP1CB;FBXL3;RNF180;EZR;PALLD;TMEM47;EDIL3;ASAP3
MCM9	43	TMEM88;CTTN;AGBL3;JMJD7;ACP2;ZRANB2;TMEM81;DIP2C;NAPEPLD;CCRL2;EED;FAM219B;CYP2U1;NCOA2;DDX17;SERTAD3;C5orf63;LNX1;NAP1L5;RBM14;ZNF512;FRMD3;ATAT1;ZFC3H1;LUC7L3;NR3C2;ZNF248;ZNF692;MTMR11;CTSO;ZNF362;PPP1R10;EBF2;ARGLU1;RPRD2;ABHD6;BTAF1;KLHL9;VAMP1;TPCN1;MASP2;CEP290;GNRH1
SRSF1	42	SGK223;FNBP4;HMGB2;ZNF692;LCAT;RIT1;SMCR8;SCN4A;KIF22;DDX17;KAZN;JMJD7;CALCOCO1;ZRANB2;PPM1J;FAM229A;ELL3;TBX19;FANCL;SLC46A3;LUC7L3;WNT2B;DPAGT1;TSSK3;PSME4;CA11;MGAT1;IFRD2;ARGLU1;SHANK3;ZFC3H1;KLHL9;VAMP1;EDA2R;ORMDL1;MASP2;CA4;STX10;ACY1;FBXL20;HES6;MYO7B
WDR33	41	CD1C;ZRANB2;AGER;RIT1;FYCO1;MYOC;ELF1;B9D2;CEP95;PPM1D;ST3GAL4;PFN2;UBALD1;ANKMY2;ETNK1;FOSL2;SCN4B;ZFC3H1;GDF10;DPAGT1;SH3RF1;VIPR1;FAM69B;RHOBTB1;SPRED3;PDE8A;FAM193B;GPR150;CD274;TACC3;LRRN3;MASP2;FAM107A;ITM2A;VAMP8;JAGN1;ARHGAP18;GNRH1;KAT6B;HOXA9;UBAP1L
GSN	41	ELANE;FAM168B;SCG5;CD34;CELF2;GRIK5;ZNF853;TTC7A;FBLN2;EPS8L2;SUN2;SOX12;PPL;HSBP1L1;RGS5;FADD;ZNF579;NUMBL;YKT6;CLEC11A;SMAD3;TMEM160;EBF4;SMARCD3;ADA;TRIP10;CORO2B;MMP27;PCOLCE2;SCG2;LRP1;OMG;SCARF2;EMILIN1;MUCL1;CFD;MASP1;PCDHGC3;EMP1;RIMS3;ABCC1
SEPT1	40	RASGRP2;MFNG;SH2D1A;TMC8;CD5;CD6;CD2;MYBL1;SMOC2;RASAL3;SEMA4D;CORO6;MS4A1;SMAP2;DEF6;NDST1;NID1;GRAP2;ZAP70;CXCR4;TRAF3IP3;IGF2;SPOCK2;ITGB7;SAMD3;CD3E;LTB;MCOLN3;DENND1C;LEF1;BMP5;ITK;TBC1D10C;RLTPR;GZMK;LSAMP;GPR171;ZMIZ2;CD3D;LCK
WWP2	40	AOX1;EFHD1;ZNF23;SYTL2;NRCAM;CLYBL;METRNL;CHSY3;SMAD3;TBX2;OSBPL1A;LHFP;LOX;GLS;NDRG4;SPTBN1;PGF;LOXL2;LINGO1;ACADL;TWIST2;ARHGEF2;AQPEP;LRP1B;ARHGAP20;NMNAT3;CLIC6;PDGFA;MATN2;FRZB;CORIN;C15orf61;PHGDH;PLCD1;PROK1;PLCXD3;PON2;TLN2;BCL6B;SNX21
FBXW5	40	SARS2;NUDT8;AGL;SPG7;C4orf21;NOVA1;SPRY4;EPHA2;AKAP9;HPS6;CC2D1A;PPP1R21;SLC25A18;RICTOR;RPRD2;AVEN;TMEM14A;MAP3K6;CDK17;ADCK1;RRP1B;NAV2;CAPN1;JMJD1C;CREBRF;KLF9;C10orf10;SNTA1;BARD1;CDC42EP2;TLDC2;RNF41;NR2C1;SMYD3;LDOC1L;BBS9;PMVK;NOTCH1;RFX3;ZNF503
RBM26	39	CNST;CTTN;PCED1A;FNBP4;FUBP1;SLC25A36;SRSF11;TIMP3;ANKRD10;C10orf137;MYH9;FMNL1;PRPF40B;WDR27;FAM229A;ZNF512;TBX19;AP1B1;FANCL;ATAT1;ZFC3H1;LUC7L3;TSPYL4;MFSD8;ZRANB2;OGT;ATRN;TP53INP1;ARGLU1;HIST1H1E;TMEM87B;SESN3;EDA2R;FCGRT;MXI1;MASP2;TTC32;GNRH1;GPR173
RASGRF2	39	CNST;MMP17;IGSF8;HS2ST1;ANO6;CCRL2;MYL6;RASIP1;TMCC3;CBX2;AVEN;SHMT2;HBEGF;TKT;TMEM204;TTYH2;JMJD1C;PRR26;N4BP1;NKD2;WNK1;HOXB3;FOSL2;EFNA1;TP53INP1;MAST4;ACOT7;APOLD1;HEY1;WSCD1;GIMAP8;INPP1;PIP5K1C;CA2;SNRK;ADRB2;KAT6B;PDE4B;SELP
ADAMTS2	38	KIRREL;CHPF2;FUBP1;ROMO1;DFNB31;COL3A1;CD9;ZNF512B;CHIT1;TPST1;PCLO;RBM14;ZFC3H1;NUDT8;KIAA0430;FGD1;CTSO;C6orf1;CSTA;PLCD1;HMCN1;LDOC1L;NOL3;DMXL2;TRIM7;UPP1;GJA5;PSMD14;SLC22A15;MEF2A;ELOVL5;COL1A2;ANGPTL2;GPX7;COL1A1;IFITM10;HES6;COL6A6
COL5A1	38	ENOX1;CEP85L;APBB1IP;UNC119B;FAM188B;H2AFY2;C1orf233;HPS6;ZNF853;MICU3;DGCR8;APOD;LDOC1L;NAA25;KANSL1L;SOX12;PYROXD2;NTRK2;ETS2;ANGPT1;FBXW7;NUDT8;PPCDC;FRZB;LRRC16A;EXTL3;LRRC1;CYP4B1;MTSS1;CYP4X1;TAF1B;STK32A;CNN3;EIF4G1;PMVK;USP53;PARD3B;COL1A1
GLYCTK	37	PCK2;PCK1;DTX1;CRLF1;MYO1D;LDLRAD4;TMEM25;GYG2;LGALS12;PCYT2;SERPINA5;AQPEP;PC;TF;RNF150;LDHB;CBLB;APMAP;PCBD1;ATP10A;FAM47E-STBD1;GYS2;STK39;USP30;ADM;CYP4F22;DNAH1;FAM65C;ALDH1L1;IL16;TWF2;PTPRF;MAOA;GPD1;TM7SF2;PPP2R5A;ARHGEF26
CLDN15	37	PIDD;GPER1;SPNS2;ARL15;DARC;AP4B1;MCTP1;ODC1;THSD7A;CD79B;BAIAP2L1;PPM1J;ROPN1L;C16orf86;LPCAT4;PAFAH1B3;S100A4;TJP1;HPX;ENPP4;HOXD1;RAMP3;MFSD6;COX4I2;CPLX1;IL33;SGK494;NUDT18;ANKRD29;COL15A1;HOPX;ABI3;CAPN11;ELK3;YJEFN3;FAR2;PRCP
CAV1	37	CLDN12;TUSC3;ERC1;CD34;ANO1;GNG11;ZFAND3;PAXBP1;GSN;KIAA1324L;HDGFRP3;MAML2;MPP3;AFF2;NTRK2;JUP;ARHGDIB;MBNL3;ROBO4;SLITRK4;COL4A3BP;ATP1A1;PGRMC1;CDC42EP5;IGFBP7;COL4A1;VASP;MAN1A1;RPS6KA2;OSGEPL1;GRIK5;ARHGAP18;ESAM;CTNNBIP1;ZNF750;CTTNBP2NL;MYO10
PLS3	36	TSPAN18;DOCK9;LCAT;PDGFB;ITGA10;PLEKHA7;DARC;DUSP23;NES;CYP1B1;WDR1;CALM1;FMNL3;CPXM2;YWHAH;ETS1;ADM5;CDH5;IFITM1;EXT1;MRPL17;VCL;CDH26;MTPN;CPLX1;SH2B2;RHOU;IGFBP4;IQCJ-SCHIP1;LY96;VASP;PLSCR1;CD2AP;TRAM1;MEF2A;CHRD
CD2BP2	36	BAG3;FUOM;DNAJC27;TRAK1;ZNF449;TRPC1;MASP2;NDUFAF3;LRRC20;ELF4;ENOSF1;DUS1L;CEBPG;JMJD4;WWC3;ATP13A2;RNPEPL1;MKS1;FOXRED1;FAM229A;ACY1;CDKN2B;GBGT1;IGF1;MAN2C1;QRICH2;NINJ2;ZNF189;ASIC3;FPGS;PSMC3IP;KPTN;MTF2;NOTCH1;CYP2E1;LPAR2
MED16	36	BAG3;ELANE;FAM168B;ACVR1C;CUTC;USP30;HSPB7;SPTBN1;COBLL1;RAB8B;LOXL2;ZNF512B;CCDC107;CLEC3B;FSTL1;MEDAG;LAMA1;MAP1B;SLC25A22;HERC5;ADA;TRIP10;COX7A1;FADS3;UCHL1;RNF19A;PCDH9;UPP1;ACYP1;CCDC80;PMVK;MASP1;TTC36;PARD3B;SNX21;EPDR1
SYNGR1	36	RECK;ROGDI;ECM1;RBPMS;SHROOM3;ITGA10;KIAA1522;ADAM33;FBLN2;PPL;CLSTN1;MYL9;CEBPB;SLC9A3R1;NT5E;SGCA;CYBRD1;SLIT3;PXN;RGMA;HSD17B6;MOSPD1;RASL11B;CD44;CASP12;CHRDL2;PCDHGC3;DTNA;EPS8L2;ISLR;SLC17A7;BMPR1B;GFRA1;HMG20B;TBC1D16;ASAP3
PDLIM2	36	FKBP10;RCAN2;NDNF;P4HA2;SETD1B;NLRC4;FAM13A;WDR1;FMNL2;PLOD1;PDE3A;ZEB2;NR2F2;GUCY1A3;FMOD;MNDA;LYN;MYD88;PIP4K2C;NUDT8;ACACA;CSK;KCNAB1;MRGPRF;SGSM3;CORO2B;LCP1;NOL3;TAGLN;ENDOD1;NPNT;MLLT4;GUCY1B3;COL6A3;MYOZ1;LMOD1
DTNA	36	ANKRD50;ANTXR2;KCNMA1;CORO1C;GPM6A;MYOCD;ITGB1BP2;NPTN;ZNF629;CCDC88A;ATP13A3;MPP7;MLLT1;MICAL1;PYGB;PRKG1;PPP1R12A;PPP1R9A;UBXN11;PSME4;MYCBP2;EPM2A;SLC38A1;KIF7;KCNQ4;RXRA;TSPAN2;MCM6;TCEAL1;TP53INP2;MDM1;DMXL2;RAB23;SLC40A1;SH3KBP1;CREB3L1
MBP	35	SCN7A;LCNL1;B4GALNT1;MLIP;DCLK3;DOCK5;BEGAIN;SOX8;TNNC1;PLP1;NCAM2;CYB5R2;GAP43;MT3;PLEKHB1;GATM;AURKB;FBXL16;NKAIN4;GFAP;FAM19A5;SNAP25;ITGB8;PAQR6;PTPN5;BRSK2;MAP2;GAS2L3;SFRP5;CADM2;NRXN3;ANGPTL7;TAC1;AATK;CCDC85C
SREBF1	35	ADORA1;CPEB4;IRS1;SPTBN4;CAPN7;GALNT7;PPP1R3C;DGAT1;ATP13A2;DVL2;POLD2;LDHD;DUSP4;ZNF664;DNHD1;FCN2;PDHA1;ACACA;C20orf27;ARHGEF16;CTSO;HOOK2;CDC42EP2;SERPINB8;DLAT;ZCCHC2;DHCR7;TESK1;TSTA3;PKD2;DDR1;CYB5A;PRRT4;ZNF775;C5orf51
C1QTNF3	35	PIWIL4;PCOLCE2;PSMB10;FNDC1;ITGA11;LYRM9;LUM;LOXL1;HSPH1;ASPN;TPST1;KCNK1;PAM;NTM;PENK;THBS3;HAS2;IL17D;COL8A2;TGFBR1;SSC5D;MN1;UAP1;FBN1;ITPR1;SEMA3C;GALNT13;SFRP4;PI16;COLCA2;CCDC80;COL14A1;WNT4;COL1A2;AVIL
ACAP1	35	BATF;AAAS;MYO1G;TMC8;CD5;CCR2;CD2;NKG7;PTPRCAP;SELPLG;S1PR4;TNFSF8;ZAP70;TRAF3IP3;LIMD2;CST7;CD8A;EPB41L2;SERPINA1;CD3E;LTB;IGFBP7;TMEM176B;EVI2A;LEF1;SELL;IL2RB;ITK;IL2RG;GZMM;GZMK;PTPRC;SNX20;TBC1D10C;GPSM3
SYNPO2	35	CLDN12;ACADVL;TEX30;RIC3;CHSY3;SPRED2;LATS2;AMOTL2;EPS8;SMOC2;CPSF4;PAN2;GRK5;SLC16A2;MAPK4;LBH;TCF21;IGF2;IGSF9B;WNK2;SLC45A4;NCS1;HOXC11;MYSM1;SUFU;CENPW;PROSER2;RSPO3;ISOC1;PFKFB2;RNF182;C9orf72;NXPH3;DECR1;CLK4
CTSA	34	CLEC10A;ASPHD1;STAB1;ACVR1B;ARRDC3;SPATA25;CHI3L2;F13A1;SLC25A12;DNASE2B;SERPINA1;NCEH1;MARCO;RGL1;S100A9;PVRL4;S100A8;TBC1D8;APMAP;ANXA5;PLBD2;ELL;ALOX5;COL9A2;PLA2G2A;DCSTAMP;PLB1;SBNO2;SH3BGRL3;CLEC4G;FAM20A;STX4;HOXA3;TBC1D14
CRYAB	34	IL20RB;STON1;RHOXF1;MAPK11;MSC;PXMP2;AQP3;NID2;DLGAP4;LDHD;IRAK3;GFAP;PYGM;HSD11B1;FCN2;C20orf27;TRO;OXT;C6orf1;HMGA2;LDB2;GPC1;GYS2;ALDH9A1;GPT;FADS3;UCHL1;FGF1;SQSTM1;CYB5A;TTC36;MAPT;GPD1L;IL17RE
MPZ	34	SCN7A;TOX;B4GALNT1;PCSK2;TSPAN11;RIC3;DOCK5;NRXN1;PLP1;RBM11;NAALAD2;RELN;CLIP4;CLDN1;CADM2;IGF2;PRIMA1;NRGN;RXRG;COL9A3;PPP2R2B;C19orf33;PDZRN4;UCP2;PTPN5;BMP3;SLC25A48;NRXN3;AK5;ANGPTL7;GFRA3;COBL;KIAA1217;MCOLN3
WDR86	34	DMRT2;SLC7A10;FUBP1;AIP;OLFM2;SLC25A30;PLP2;LAMB2;NDRG4;ASPG;SERPINA5;MAP3K5;MRPL54;RBM14;S100A4;SCN4B;GDF10;SLC24A3;LGALS3BP;FAM89A;C10orf90;KITLG;SLC27A2;CCND1;ALDH1L1;OSGIN1;CEPT1;RARRES1;TTC36;SIGIRR;GABRE;STARD3;WIPF1;CD109
DCLK1	34	FKBP15;ORAI3;MKNK2;ZUFSP;CCR1;MARCH1;KIAA1033;FAM13B;DNA2;TAF6L;TRIM33;B4GALT1;TBX19;SETDB2;CCDC51;CSK;CTSO;MFSD1;RUNX1T1;CYBB;ATXN7;GPATCH4;PLEK;SREK1;APBA3;PARP16;C1QB;TNRC6C;ZZEF1;LPAR2;KAT6B;CYB561D2;POU2F2;CKAP4
ARHGAP6	34	AMOTL1;EFNB1;CUTC;KIRREL;BIRC3;ZNF697;CNTNAP1;FABP4;ME1;SPSB1;KIAA0922;CHML;GPAM;SERTAD4;RARG;MLLT4;PDE1B;C14orf159;SLCO4A1;EXTL3;CSK;TLDC2;PCYT2;KLF11;STK3;SKIL;IKBKB;SGK2;RLF;RARRES2;USP53;VIM;AGO4;TMED5
EHBP1	34	ACADVL;ABAT;RAB9B;NCS1;ZNF697;FRMD4A;CLMP;SETD1B;IZUMO4;FABP3;ME3;SLC4A2;DHX35;RERE;QKI;CCDC102A;PELI3;NCALD;RFTN1;MBNL3;VPS13A;TEX30;KIF7;CAMK2G;AR;RHOBTB1;MDM1;PROSER2;C15orf41;PCDH9;LRRC4B;ZC4H2;EMILIN1;ASPRV1
DUSP23	33	TGM2;CCR7;LCAT;PLS3;TMEM255B;SPNS2;MAPK12;PGS1;DARC;CMIP;IL18BP;TLL1;THSD7A;CDKN3;FAM167B;SULF2;NNMT;ADM5;IFITM1;UGCG;RAMP3;TSPAN1;RAB3C;IL33;GRAMD1A;NT5DC1;CFI;PLSCR1;IL6;GNA14;PLEKHA7;MCU;HAPLN3
PLEKHG6	33	EPHX1;PCED1B;DSC2;TSPAN12;GLIS1;LRRC16A;KHDRBS3;MFAP4;GPD1;NLRC4;KIAA0922;KLF11;FMNL2;ASPH;NTRK2;SPARC;ABRACL;PYGL;NUDT8;CHRDL1;LGALS3BP;MGAT1;LPL;DDO;NMT1;KIFC3;ZEB2;TNIP1;GJA5;SELENBP1;ELOVL5;AMIGO2;AMOT
SLC22A23	32	CDKN1B;SMAD6;CCRL2;C15orf39;PLCG2;SPRY1;GRASP;BIN3;NEDD9;ITPRIP;SIK1;BACH1;C8orf4;SOX17;PIK3R3;KLHDC10;SNRK;CA12;DLL1;SSH1;MPZL2;APOLD1;USP36;HEY1;HLX;DUSP1;LRRC32;CMTM8;HES1;PDE4B;RNF122;CH25H
CCDC39	32	ANTXR1;NOVA1;PDGFRL;ADAM33;CBX4;HTRA1;RGMA;PODN;FAM180B;WISP2;DPP4;PLXDC2;STON2;TLDC2;CTSK;CREB5;VAT1;MTSS1;ABLIM1;MXRA8;F10;BBS9;TAX1BP3;IRF4;CBL;DKK1;ABCA6;ANK2;RND3;ANGPTL2;SH3PXD2B;MMP2
S100A13	32	CD70;TIMP1;FAM168A;THBS2;C1orf54;BGN;SMAD3;ZNF853;STXBP6;DBN1;VASN;STAT6;DLG4;EXOC6B;SOX12;PAMR1;PPL;NAV2;SUSD3;ARHGEF10;SH2D4A;LMX1A;CLEC11A;MTSS1;TMEM102;SALL2;HEPH;FGFR1;C1QTNF7;DKK1;EMP3;KIAA1199
FAM69B	32	FAM198B;AFAP1L2;LRRC16A;RIT1;CHN1;LAMB2;CAD;PPM1D;MTR;SLC12A2;MGEA5;ANGPT1;CDH6;SLC38A2;FRZB;TDRKH;TRMT13;HDGFRP3;IGFBP7;SGK494;BTAF1;KCTD13;PREPL;CHST12;NCK2;CEP290;SLC2A4RG;ATP6V0A1;CDC45;SNX20;C5orf54;WBP5
UGP2	32	MORC3;MMP17;APBB1IP;TMEM88;PCOLCE2;CLMP;MGST1;SLC5A6;ANKRD13B;TRMT13;SRCRB4D;LIMCH1;DGAT2;SMG9;TPPP3;LYN;YWHAG;ZNF362;UAP1;PMEPA1;YJEFN3;RBP4;TRIP10;FADS3;SEMA3C;TMEM62;PCDH1;ACSL1;NOC3L;CHN1;PDZD2;SNX21
SUV420H1	32	SPHK2;PMAIP1;HSPB7;HRSP12;NFKBIA;SLC2A13;RASSF4;MAPKAPK3;RAB8B;PPM1F;WASF1;LRRK2;FAM46B;AHDC1;IRX3;CCDC51;NPR3;YKT6;LGALS3BP;TEX261;TIPARP;PIGU;RHOBTB1;SNAI2;MAN1A1;TBL1X;CCDC107;FAM166B;SDC3;SPEN;ELOVL5;PSKH1
CCDC50	32	CPEB4;LGI4;CORO1C;SPRYD3;PMM1;CD248;CD9;DRAM2;CCDC107;WASF3;CCDC88A;MFSD1;MBNL1;CUL7;FEM1B;YWHAG;PACSIN2;KMT2E;ACSS3;ST6GALNAC6;CYP4X1;CALD1;PTPN6;SLC27A2;S100A6;ORMDL3;FBXL3;TMEM25;NEDD4L;PDK2;GNG2;PNMT
MFGE8	32	DHCR7;LAMB1;FABP9;AHDC1;KYNU;YPEL2;MPP3;PLOD1;MKL1;GJB6;AZI2;SOBP;KLF2;MYD88;RIMS3;ATP6V0B;ZMYND8;EFEMP2;COL5A2;DLL4;COL4A2;COL4A1;PLEK;AGTRAP;GALK1;LTV1;ALDH1L2;SH3TC1;ROCK2;BBS10;PAK1IP1;SLC35C1
CALML4	31	MFNG;CD34;ITGA6;RCOR3;GPSM1;ADAM15;ALDH1A2;TLL1;PRICKLE4;ECSCR;LHX6;ARHGEF3;UACA;HSPA12B;STOX2;PACSIN3;C1orf115;CALHM2;TPO;FAM214A;CARD10;TSPAN1;ST6GALNAC1;ZNF521;APLNR;AVPR2;C10orf128;FAM105A;C5orf54;ZNF467;POU2F1
KRT5	31	AOX1;AOC2;ATP2A3;SLC7A6;CYP4B1;KRT1;KLHL26;BAALC;LOX;S100A14;FBLN5;FURIN;LYPD3;PELI3;KRTDAP;PTK2B;ABHD5;CCDC51;TSC22D3;RASSF4;GATSL3;HERC5;SMARCD2;FRMD1;COL17A1;P2RX6;FAM166B;FOXO1;CALML5;NEDD4L;KRT10
BRE	30	RASD1;CCRL2;SRGN;B3GNT5;KLF11;ADAMTS1;EGR3;NR4A2;THEMIS2;FOXF1;KDM6B;PRR26;N4BP3;C9orf40;NR4A3;FOSL2;ENO2;CYTH1;SETD5;INPP1;SNRK;TNFAIP1;RUNX2;CREM;SPATA2L;PDE4B;ZBTB21;RNF122;ATF3;CH25H
FBXW7	30	FAM198A;AOX1;FAM168B;SLC7A6;NFKBIA;ITGA5;HOXC6;HAND2;CTIF;PON2;JMJD4;FMNL2;TMEM178A;CCDC51;PARD3B;CSK;TLDC2;EFEMP2;CHRDL1;DCUN1D4;TRIP10;NOL3;CNNM3;LRP1;GJA5;DKK1;ADRB2;ARHGAP10;KIAA1239;RNF146
MKNK2	30	CIRBP;MAMDC4;HIST1H4H;C15orf38;HAAO;C19orf24;USP24;ACADM;HIST1H2AC;YJEFN3;JMJD4;MAP3K5;AHSA1;C1orf159;LDHD;RNF19A;CLASP2;ACSS3;PDIA6;TANC1;NUDT5;ACOT7;HSDL2;KPTN;RCC1;HOPX;LTV1;ZNF449;KANK3;PARD3B
MRAS	30	ANKRD53;DHDDS;CUTC;SLC7A4;ITGA5;RHOXF1;GPBAR1;CTIF;P2RX6;GPAM;SNCG;SLC38A11;SLC27A2;PACSIN2;HSPB7;TRAF3;CSK;ITPRIPL1;MAN2A2;HSPB8;SLC24A3;TNIP1;ABHD5;C3AR1;CD163;NPY1R;EGFL6;AGPAT2;ARHGAP10;AGPAT9
PSMB10	29	GLRX2;UQCRQ;UBE2L6;ACAD11;BATF2;OAS2;GBE1;MGEA5;MYD88;PTPRN2;PARP9;PRSS53;CTSO;RTN4;HMGA2;GCKR;TRIM21;HRASLS5;LGALS1;CAPG;WARS;SLC22A15;CD14;NKTR;PSMB8;MME;SNX20;CCDC17;NMI
ISLR	29	AGL;DOCK2;SORCS2;LIMS2;ADAM12;NCKAP1L;SETBP1;LUM;AEN;MRC2;DLG4;SUN2;NDST1;FAP;TLN1;SMIM10;ROMO1;TSHZ3;MED30;APRT;SEC11C;FAM57A;SLC2A9;SFRP4;PLXNA1;NPY1R;OGN;PID1;TBC1D16
PDE8B	29	HSPB6;DMD;TRAF1;SMO;C15orf38;ANKRD37;PLIN1;DGCR8;PC;DGAT1;ZCCHC14;JUN;C8orf4;PNPLA2;BANK1;DAGLA;HSPB7;HOOK2;AR;RBP4;CNTFR;TRIM44;ADCY5;C5orf38;PTPRF;AGPAT2;MGAT4B;RNLS;YBX2
COL1A2	29	IGF2;FNBP4;COL14A1;HSPG2;BGN;MAN1B1;CCNG2;MFAP3;ASPN;GSE1;R3HDM4;SPARC;TMEM204;B4GALT1;ATG9A;MTMR3;CTDSPL;ARL13B;SLITRK2;COL18A1;MRGPRF;IGFBP2;NPL;APBA3;MAATS1;EMX2;ZBTB40;GORAB;PPIC
CD47	29	ACP2;LCAT;SPATA24;DENND4B;TMEM86A;UBXN11;XPO1;SAMD10;FAM167B;BID;SMG9;TMEM255B;DPYS;IFI16;KIAA1147;RAB15;SLC46A3;TICRR;KMT2E;ADAT2;ARGLU1;TMEM102;KLHL9;GPR3;CCDC115;MASP2;TRIM7;PITPNC1;NAB2
RAI2	29	STIM1;SESN1;CUTC;SLC7A6;SLC2A13;CHSY3;GLUL;CD7;MAP2K6;SMOC2;SMARCA1;CERS6;CCDC102B;BACH1;MKL1;CSRNP3;OBSL1;FOSL2;B4GALT1;FAM102A;CYR61;SLC7A2;DIO3;HMGA2;COL5A2;IGFBP7;NGFRAP1;LRRC17;GORAB
IGF1	28	EGFLAM;DPT;GAB2;ESYT1;SLC29A2;CD248;PARM1;CDC37L1;RHEBL1;WASF3;ADRA2A;NTRK2;B4GALT1;YPEL5;SOD3;ATP10A;NPY2R;CNTFR;C1QTNF1;SRPX;BBS10;CREB3L1;ANGPTL1;MGAT4B;AGTR1;RTN4RL1;PICALM;SLC1A3
CLK1	28	GIGYF1;ACP2;UNC119B;PNISR;HDX;PODXL;TNRC6C;CBX6;MICU3;CEBPB;SERTAD3;ARHGEF7;TIAM2;PPP1R16B;DUSP1;KLHL36;IGF1R;PPM1F;PPP1R10;CHTF18;RBFOX2;VASH1;MAZ;C1orf35;MASP2;C17orf59;TBC1D13;RGP1
RAPGEF5	28	ABAT;FAM168A;TSPAN13;CPD;ZDHHC18;STAC;PKP1;NDRG1;CHD1;LNX1;DSC2;GNG11;LCN10;BSG;SCNN1B;DHH;ENPP2;EFNA1;USP13;SLCO2A1;VEGFC;WSCD1;ISOC1;GPIHBP1;LMO4;CA4;ZNF792;PTPRK
CNIH3	28	CD52;ACP5;HDAC7;STIM1;SLC7A6;SMOC2;MOSPD1;SLC29A3;CCR5;RBMS3;MAPK13;F13A1;OPN3;DNASE2B;CCSAP;CHIT1;DAGLA;ALOX5;CTSD;DCSTAMP;ZEB1;SQSTM1;FAM65C;FAM65B;HEXB;CYP27A1;SLC1A4;COL12A1
ITGAE	28	DOLK;GPRIN3;CHPF2;CPD;HPS6;SLC2A4RG;RNF38;XPO1;PAN2;LBR;B3GNT2;KANSL1L;CRY2;RBM14;SAMD9;TMEM51;CCNL1;ITPRIPL1;GUCY1B3;SLC25A42;CYYR1;YJEFN3;SLC15A3;PREPL;PMVK;POGZ;ABCA5;SHISA3
SRSF7	28	IGSF8;ZRANB2;FUBP1;CCDC68;TMCO6;SMAD3;PKDCC;XPO1;YJEFN3;TMCC3;ZNF512;DMTF1;SPIN3;EPM2A;RAC3;MFSD1;LDB2;DCUN1D4;NMRK1;SGK494;RBM12B;GART;ABHD6;VAMP1;PIP5K1C;COX14;ATF3;UBAP1L
CABLES1	28	HSD17B10;AOC2;ACVR1;ALDH3A2;ZNF219;RHOXF1;PMM1;NDRG4;ASAH1;SNCG;ASPH;PYROXD2;MAP3K5;GLI3;SURF4;SLC38A2;CSTA;SLC24A3;TTC8;VEGFA;C10orf90;FADS3;SLC27A2;XRCC6BP1;TMEM25;EGFL6;GPD1L;KIAA1239
C1QTNF7	28	CRYAB;PTPN3;FABP4;HIST1H2AC;CAV1;NEK7;SIM1;SNCG;C19orf80;CISH;EPB41L1;NPR3;ELN;C20orf24;PRMT7;GYS1;CLPTM1L;NMT1;STS;C10orf90;GJA5;OSGIN2;GLUL;EGFL6;FAT1;ELOVL5;PDK4;ZNF512B
S100A16	28	FAM213B;MYRIP;SRC;KIF17;KL;LUC7L;HSPH1;MECOM;TUSC3;DOK3;TGFB1I1;NR3C2;SRF;ELTD1;ACAP3;MCM5;SGSM3;THOC1;TSPAN9;ST6GALNAC3;ENGASE;AGFG2;ROBO4;PRRT2;MEF2C;FCHSD2;CTNNBIP1;PTPRK
ARHGEF40	27	ANKRD53;EPHX1;SLC7A4;ME1;CBX6;KIAA0922;PLXNB3;SERTAD4;ASAH1;ARHGEF6;PDE1B;ANKRD9;CAP2;TKT;C19orf80;KIF7;PJA1;PARVA;PYGL;THRSP;QDPR;HSPB8;PHLDB1;LMNA;SGK2;FAM166B;KANK4
ABLIM3	27	ERRFI1;SCFD2;ARHGEF2;EPHA2;SOX9;CC2D1A;ME3;SDPR;PELI2;MECOM;MAP3K6;CBR3;PML;PRR26;KLHDC10;CDC42EP2;IL18R1;LDB2;MTUS1;TSPAN6;ANKS1A;APOLD1;TRIM8;GCH1;MCF2L;SLC22A23;NOSTRIN
IFI27L2	27	OAF;PIWIL4;DIRAS1;MFAP4;GCHFR;DCN;MRC2;CYBRD1;ZNF436;TGFB1I1;HEBP2;DACT2;PI16;NUMBL;SNTA1;CHRDL1;MTFP1;C11orf89;ADA;ST6GALNAC3;PRRG3;CADM2;CCDC80;CILP;SLC23A3;OGN;WNT9A
DDRGK1	26	ZNF22;LDLRAD2;ARFGAP1;VASN;IKZF2;ANKRD9;DOK2;FAM193B;TBX19;LFNG;ZMYM3;DPAGT1;LYL1;FAM214A;MFSD5;CTC-241N9.1;TP53INP1;SKIL;RHOBTB1;PLEKHO2;SUV420H2;EDA2R;ZNF692;PRR16;GNRH1;ANKRA2
SLC25A25	26	UGCG;CDKN1B;CDKN1A;PPRC1;DACT1;SRSF7;PLEKHF2;ZNF436;FAM110D;TGFB1I1;MYC;B4GALT5;MIDN;RALGDS;PIM1;CCDC71L;RHOV;SLC41A1;LYPLAL1;SBNO2;RGS16;PLSCR1;IL6;CDK2;RNF122;BCL3
SCRN2	26	PCK1;TMEM139;PKDCC;BMPER;GPBAR1;SPSB1;HTRA1;GSE1;MAP3K6;CDK17;NAV1;ZNF664;ZBED3;IL4R;DHRS12;C3orf52;CLPTM1L;MOGAT1;EHHADH;ALDH4A1;ARID5B;GRB10;C1QTNF1;EGFL6;DIXDC1;AKAP13
SH3D19	26	ACP2;FUOM;DNAJC27;TNFRSF14;ANKRD37;NDUFAF3;NOXA1;RB1CC1;ENOSF1;KLHDC1;L3HYPDH;JMJD4;TCP11L2;FMNL1;TRIM33;C20orf27;QRICH2;GRINA;ADAT2;MON2;CENPV;KCTD13;MTF2;ZNF449;RHBDL1;TRPC1
CDK16	26	EFHD2;EFHD1;TIMP3;LAPTM5;ADAM15;CYP2S1;SDHAF1;PPFIA4;ANKRD9;CD86;C10orf54;MYD88;PDHA1;HEG1;MFSD1;SERPINB8;ENO2;GALNT7;CPVL;BMP6;AIF1L;RAB24;APBA3;TMEM160;VAMP8;OSGEPL1
VPRBP	26	ZNF691;FUBP1;LDLRAD2;DDX17;ZNF605;ZNF512;ZFC3H1;LUC7L3;LYL1;COX4I2;ATIC;ARGLU1;PHF23;KLHL9;EDA2R;CCDC136;ANG;PRDM11;CCNG2;MASP2;CCDC19;ZBTB40;TTC32;NRROS;ZKSCAN8;FBXL20
PTGER3	26	STX1A;FAM168B;ZFP1;SLC4A3;DFNB31;LMBR1L;BBC3;FABP9;XPO1;GPX3;MEF2A;RBM14;SREK1;MFSD1;SLC25A22;LY96;ACHE;MEX3B;HSDL2;SLPI;LRP3;PTPRS;SNN;MAMLD1;ELOVL5;ZNF775
TESK1	26	RASIP1;HS3ST1;ZNF692;RIT1;ERF;PYCR1;SORBS3;RARA;SERTAD3;TOB1;PPFIA3;URB2;TMEM63A;ACACA;PIM3;UXS1;CDC42EP2;MFSD5;BCOR;PLEKHO2;SNAI1;SETD5;FAM193B;MIDN;TREH;PITPNM2
YBX2	25	SPHK2;SLC7A6;ME1;S100A10;B3GNT5;GPAM;DGAT1;CAPN2;SRPX2;DUSP4;MID1IP1;ANXA1;ACSS2;PCYT2;CTSZ;MYLIP;SH3BGRL3;SOS1;PFKFB1;PKD2;FAM166B;SREBF1;PDK4;DBP;TTC38
EPB41L2	25	ZNF691;TRAK1;ARHGEF12;SERPING1;RNF38;TBC1D8;TMEM38B;ALCAM;B3GNT9;ADCK1;RABGGTA;PHYKPL;FCHO2;VEGFA;TNFRSF11A;IGFBP4;ZFAT;TRANK1;ARMCX2;GPX3;TREML1;DEK;CCDC88A;IFITM10;ZNF512B
PKIG	25	MAP3K6;EGFR;PIDD;TCF7L1;NDUFAF5;PLCG1;MYOCD;NPHP4;CBX7;AZI1;CHD6;ARHGEF2;SCNN1D;PIK3R1;N4BP1;TLDC2;EXTL3;CBX6;TANC2;PER1;FER;PDZRN3;ENDOD1;MGAT2;CBL
PC	25	TMC4;EPHX2;VSIG4;TMEM252;KLF11;SELENBP1;PALMD;MYD88;MID1IP1;IGF1R;PCYT2;ABHD14A;SH3BGRL;CALD1;TM6SF1;GJA5;PEMT;ENDOD1;ADCY9;GNAZ;ARHGAP32;TTC36;PKD2;TMEM47;AMIGO2
ASPH	25	HSPA2;FGFRL1;ACD;PEX19;ADIRF;FBLN2;MESP1;TMEM132C;RPL28;PDE1B;CDR1;CUL7;DNHD1;LAMA3;ACSS3;LPL;PTPN3;PLA2G16;BSG;GSTZ1;IRS2;SLC2A4RG;ITM2A;GPX4;SPR
TBC1D16	25	ZDHHC13;KIAA1671;RHOXF1;PEX19;NDRG4;PLXNB3;GAS2L1;GAS2L2;PCBP3;RBM14;CUL7;C20orf27;LSM7;MFSD5;RXRA;KIAA1107;TMCO6;C10orf90;FAM193B;HPD;AGRN;SLC2A4RG;TTC36;C5orf54;PTPRK
CDH23	25	SYNPO;CCDC68;ME1;LOX;HMCN1;P2RX6;PLXNB2;SCGN;SLC38A10;SNCG;B4GALT2;PACSIN2;AC139100.2;CSTA;IGFBP7;FADS3;FRZB;DHCR24;COL18A1;UCP2;KRTCAP3;ADRB2;ELOVL5;GPD1L;KIAA1217
MPZL2	24	MFNG;UNC119B;CDKN1B;TNRC6C;CPNE5;CBX6;PPM1F;SERTAD3;ITPRIP;BHLHE40;NDST1;RGL2;JUN;C8orf4;HBEGF;DUSP1;PELI1;GIMAP7;ARL5B;FAM43A;PCDH1;ZFP36;RNF122;ATF3
CMIP	24	PTPRN2;FNBP4;CPD;OLFM1;MFAP3;DARC;TLL1;GPR146;ECSCR;CPXM2;SULF2;TIAM1;ADM5;MVP;TGFBR2;IFITM1;HPN;GIMAP6;ST6GAL1;TACR1;TSPAN7;SCN1B;HAPLN3;IL33
FBXO32	24	ITGA8;PIDD;FABP4;SETD1B;CCR5;SMPD3;NLRC4;ITIH3;ZNF10;FAM46B;SCNN1D;PPP1R12A;CDC42EP2;RAMP1;PDE5A;DBNDD2;MFSD1;ARL6IP6;KCNAB1;COL4A6;ZNF22;MDM1;IRS1;NPNT
SLC44A1	24	EVA1B;PPRC1;LURAP1L;L1CAM;ARID4A;MAGEF1;YJEFN3;TMEM204;CEP350;GREM1;EFNA5;TOP1MT;HOXB7;HEPH;GLTPD1;TRANK1;PMP22;EMILIN1;LRP4;SLC17A7;CHN1;ALDH2;ACKR3;GFPT2
DMPK	24	PTH1R;SAT1;C1orf122;GIGYF1;CKB;HRSP12;JPH2;SLC29A2;LDOC1L;SPHK2;NDUFB7;ABCD2;CISD3;EPHB6;TEX261;USP15;GIMAP6;ITPR1;NOL3;RANBP3L;PPP1CB;PALLD;ELOVL5;CCNH
MXRA8	24	ZNF865;C11orf96;FAM173A;HSPBP1;SDHAF1;CEBPA;CEBPD;NR2F6;PRR7;IRF2BP1;FBXL15;FAM229A;HEBP2;PRR24;SOD3;HOXB2;TMEM160;SDF2L1;SCARF2;ZNF580;COMTD1;AMN;C1orf35;CCDC85B
FOSL2	24	CDKN1B;FOXO1;MXD1;FURIN;PPM1F;CEBPA;KLF16;ZNF740;C20orf112;RGL2;CDK17;C8orf4;FOXRED1;CLDN5;NEDD9;CDC42EP3;MYCT1;EXTL3;VWA1;SLC41A1;ABCG1;HLX;YDJC;KANK3
SLC7A8	24	AOX1;UNC119B;RASSF3;PLK2;MFHAS1;FOXO1;CBX6;OPN3;FBLN5;DRAM2;PCNXL2;ATP13A2;PPL;LIG4;KLF6;RIMS3;ISM1;PRKCE;PER1;MTSS1;C1orf54;SLC43A3;C6orf62;TNFAIP3
CLMN	24	C14orf28;KIAA0408;ERF;ARFGAP1;BCL9L;PGF;NCOA3;AXIN2;AQPEP;SUV420H2;DNHD1;ALPK3;CDKN2D;KIAA1107;KCNB1;DUSP16;FAM193B;NCK2;SPATA7;CRTC3;C5orf54;KLC4;COQ3;BZW2
EPC2	23	BUB1B;KIAA0232;TLE4;GLTSCR1L;ENOSF1;NHLRC3;DDX17;PLEKHF2;ZRANB2;ANGEL1;RBM14;ZNF512;ZNF514;MED30;CREBRF;RPUSD1;MVB12B;GIMAP5;GART;POMGNT2;ATP6V0A1;BZW2;TMEM42
DYRK2	23	ZRANB2;FBXL7;CBX4;SPSB4;ITPRIP;PTHLH;TPPP3;B4GALT1;PLXNA2;MCM10;COL4A3BP;DIAPH1;ACSS1;WNK1;IER5L;PTGIR;PLEKHG4;C1QTNF3;TNFAIP1;PARP10;ADRB2;RADIL;HOXA9
PMP22	23	KCNE1;TTLL4;ZFAND3;ADAM33;CYP27A1;LOXL2;ZCCHC14;ARHGEF1;OBSL1;CITED1;RRAGD;SLC44A2;ACACA;COL4A2;COL4A1;GDF15;TMEM63A;OSBPL11;CD93;NIPSNAP3A;SPON2;ELOVL1;PDE4B
CDKN1C	23	ANKRD53;FXYD7;ALDH3A2;RHOXF1;SIDT2;SRBD1;ESYT1;HBEGF;RAI2;DOK5;PGRMC1;NDN;ATP10A;MCM7;FOXRED1;MAGED1;ZNF862;SLC2A4RG;BBS10;VIP;POLE4;MYZAP;AGPAT9
SCHIP1	23	UBL4A;SMAD1;PGF;GPR146;FILIP1;PLOD1;ADAMTS9;MARC1;AHDC1;TMEM204;SCNN1B;N4BP3;PDGFB;DGKD;PDIA5;EFNA1;PDE10A;WSCD1;FAM43A;AGFG2;FBXO31;CRLS1;NYAP1
MARK1	23	KCTD3;CUTC;SETD1B;LAMB2;ODC1;CTC-349C3.1;ASPN;ZNF385D;SPARC;SCN4B;STK36;MAP1B;ARHGAP10;SLC38A2;FAM214A;TLDC2;CYTH1;ADK;GPR3;CCDC80;LRCH1;MBD3;HOXA9
GYG2	23	ZNF691;UQCRQ;PEX19;GCN1L1;NEXN;HPD;FEM1B;ZMYM1;C20orf24;MFSD3;NUDT5;NLE1;TCEAL1;SNPH;TCEAL8;CALD1;HTATIP2;SLC27A2;PLEKHG4;ZDHHC9;PALLD;PTMS;WBP5
NOL3	23	EPHX1;AOC2;SAT1;SLC29A2;SLC39A11;WASF3;SELENBP1;C19orf80;RIMS3;EPB41L1;HSPB7;LGALS3BP;TNIP1;ALDOA;CYP4X1;FRMD1;HRC;RGS14;FAM166B;PTPRG;ELOVL5;IL11RA;ALOX15B
SPTBN1	23	ACVR1;TGFBR2;RRP1B;IL1R1;FAM149A;KANSL1L;PPM1M;AQPEP;PHOSPHO2;TTYH3;C3orf18;EPB41L1;LRP11;FAM47E-STBD1;TTC8;FPGS;MMP28;CCND1;ZNF358;GATAD2A;RTN4RL1;CCNI;GLCCI1
IGFBP3	22	C8orf82;SORBS3;SDHAF1;CEBPA;KLF16;NR2F6;ANKRD9;PRR7;KLF2;ZCCHC3;ZNF579;PRR24;HOXB2;CLEC11A;ZNF580;UCN;PDF;ZNF444;TRAPPC5;C1QTNF4;C4orf48;SLC1A3
TUT1	22	ZNF691;FAM109B;RARA;TICAM1;ARAP3;C8orf4;PPP1R16B;TRAM1;TAL1;TK2;CLU;EHHADH;ZNF644;RCC1;ALDH4A1;NOTCH4;PPAN;ZBTB40;ZFP36;ZNF792;PTPRS;BCL3
DGAT2	22	EFHD1;TIMP3;ACVR1C;ZDHHC12;CPEB4;TMEM252;SLAIN2;PTGER3;ZBTB38;PARVG;KCNAB1;LPL;SH3BGRL;CALD1;LRP3;DNAH9;IRS2;PALLD;TTC36;GPR97;PLAGL1;GPSM1
GPAM	22	FARS2;HMGB2;PANX1;A2M;GNAI1;KLF11;AHDC1;ARHGAP20;KALRN;SCN4A;DUSP4;SNX33;ABCD2;YWHAG;EHBP1;WNK1;NMT1;SNAI2;RBPMS;ADRB2;PDK4;BCL3
MDK	22	FAM160A2;ANTXR1;NPEPL1;CD34;SMO;ZNF853;ODC1;TM4SF1;MAP3K5;KLF6;S100A4;S100A3;TRPV2;ENO1;LDB1;GRN;FRY;CYP4X1;MCM6;MMP2;TTC36;PTPRK
YARS	22	CDKN1B;PPRC1;MLKL;ARID4A;SOX5;CNTD1;BYSL;MECOM;PIK3IP1;CDC7;CCNL1;SLITRK4;DUS1L;PAK1IP1;RAB3A;GATA3;SUV420H2;LTV1;C17orf59;HOXA4;FAM117A;DEDD2
GNAI1	22	PPAP2B;CUTC;UNC119B;LRRC16A;MFHAS1;GLUL;PNMA1;CBX6;COMMD8;CCDC102B;SPG20;BICC1;DAGLA;SOD3;FAM214A;TLDC2;ADK;MAN1A2;GPR3;ARID5B;ZBTB14;RNF146
FAM219B	22	NUDT8;C1orf213;DGCR8;ASPH;PPM1J;TKT;PHC2;EDN1;TBX19;PYGL;FAM214A;C10orf10;ST3GAL5;ACSS2;RBP4;ING4;PIGZ;LDOC1L;GPR3;PRR16;CREB3L4;C9orf116
MKKS	22	ANKRD53;MUT;HIST1H4H;RHOXF1;TMEM132C;GAS2L1;RPL28;C6orf106;GSAP;ENOSF1;CDNF;GLIS1;FMO4;ACSS3;TDRKH;FPGT;FPGS;SCML1;BTAF1;PLA2G16;ZDHHC7;BBS10
HYI	22	LGR4;FXYD1;HAAO;MARCH3;PDCD11;PNMA1;NR1D1;B9D1;HSD17B8;CDNF;AMT;IMP3;DHRS12;MAP7D1;FBF1;PHYH;ZMYM3;EMX2;TRAPPC6A;STX12;DIXDC1;WBP5
IFRD2	21	RARA;BYSL;PPRC1;RASIP1;WDR43;SSTR2;YPEL2;ZBTB21;TCP11L2;CLEC2B;SRSF7;TP53INP1;PIK3R3;PAK1IP1;SLC25A44;USP31;URB2;CASKIN2;TOB1;MYD88;SETD5
DMD	21	BCL2L1;SH3BP4;NPR3;AMOTL2;KIAA1324;AFAP1L2;ACOX2;NUAK1;PIEZO1;SOX18;AKAP9;CDC14A;NOTCH1;ABCA6;SNAI2;AQP5;BRD8;GLMN;CLEC14A;IFIT5;AJUBA
RECK	21	XPO1;CD53;LAMA2;LPAR1;ANXA4;DPYD;MFSD1;NOVA1;SRRM2;WDFY1;HIPK3;STARD9;SRSF11;FBLN5;VIT;ZCCHC3;SLC18A2;ORAI3;BSG;LZTS2;GRM2
ICAM2	21	SH3BP4;ARHGEF12;LAMA3;IGSF8;RAC3;ACVR1B;ZNF691;CADPS2;EFS;SORBS2;FBXL7;LDB2;AGAP1;PTMS;TRIM35;PITPNM3;VAMP8;MOB2;DBN1;C5orf54;SLC6A6
TEX10	21	RARA;ZNF10;ARHGEF12;MEPCE;PTPRS;TMEM62;UXS1;HEATR1;SLC7A6;TCF19;PPRC1;TCF7L1;ADCK1;ZMAT1;ZNF691;KHK;LRRC45;CREBRF;TYK2;SOX9;ODC1
LRRC32	21	DGCR8;MAML2;LATS2;BHLHE40;TRIM25;SNRK;MYH9;CD93;INPP4B;EGFL7;CRYM;SLC29A2;NEDD9;SPARCL1;PLEKHO2;HES1;STC2;PJA2;TICAM1;FOXC1;SIK1
CD37	21	NCF2;ITGB2;IL10RA;FERMT3;MYO1F;STXBP2;C1QC;PYCARD;TMCC3;LIMS2;CHN2;PPT1;PPM1D;PTPRB;GFRA2;ARHGAP4;NPC2;GRN;FUCA1;TBXAS1;CPVL
PLCD4	20	EPHX2;PGAP2;GJA5;LRIG1;IGFBP3;ADORA1;ACSS2;FAM166B;SELENBP1;SLC7A6;SLC16A7;DGAT1;SMPD3;ELOVL5;IZUMO4;NMT1;RBM14;NAA25;ECHDC2;NOL3
RPGR	20	RARA;QRICH2;LYL1;NRARP;ACP2;C17orf67;C20orf112;SH2D3C;EMX2;EPHA2;CPNE5;RFX3;ZBTB16;CBL;PITPNM2;PNISR;ABHD3;SNAI1;ROBO4;FOXF1
MTR	20	RCC1;FAM160A2;KDM3A;RASGRF2;PLD2;STX10;MLLT4;ZNF691;KIAA0232;S100A6;PTMS;SEPT8;USP31;URB2;S100A4;FAM13A;MTMR3;ODC1;PHF23;POU2F1
TXNIP	20	AMOTL1;BMP6;AIF1L;HEG1;SPSB1;UNC119B;KIRREL;TXNDC5;NOC3L;PTGER2;KLHDC10;SHOX2;MON2;ZRANB2;PNISR;ARGLU1;GIMAP6;TRAM2;CCNH;ELF4
RASSF4	20	KCTD3;LGR4;DDIT3;SESN1;ARID5B;RASL11A;RGS22;CCDC71L;TMEM37;C1QTNF1-AS1;KIAA0408;ABCA6;SLC31A2;MAST4;TBX15;SPRY1;ALDH18A1;CBX4;MAFB;PNRC1
AKAP12	20	hsa-mir-1199;B3GNT5;SGIP1;RNF122;ITPRIP;RWDD3;NDUFB7;SETD5;BACH1;THRA;CELF1;KIF19;PLEKHA7;ARHGAP20;STC1;PRR26;BBC3;DUSP6;IVNS1ABP;APOLD1
RAB30	20	NEK7;MAP1B;FAM198B;KHSRP;LRRK2;ORMDL1;MCM2;GNPDA1;ASPH;PGAP3;RHOXF1;LIG4;SNCG;UCHL3;IGFBP7;FHL5;MBNL1;KLHL9;TIMP1;FAM229A
TNMD	20	BMP4;PLEKHG6;NTRK2;PALMD;FMNL2;MAP3K5;SAMD4A;ECM2;CRHBP;CA4;SCN4A;FRZB;GPC3;NOSTRIN;GNAZ;HECW2;PDE1B;IQCK;ACSL5;GDF10
ACSF2	20	NR3C2;PPM1D;LAMA4;RNF38;KMT2E;CALM1;ACSS3;OSGEPL1;CDR1;NOC3L;GNAZ;CD2AP;MTPN;MAP7D1;SERPINB8;TTC36;DCAF15;TBC1D9;PAXBP1;FAM214B
SLC39A10	20	CAPN7;PPP1R3E;AGBL3;AXIN2;ZRANB2;PHOSPHO2;CD109;GLIS1;PTPRG;AQPEP;ZEB1;DAG1;ATP1A1;C9orf72;PLXND1;GIPC2;C5orf54;GATA2;GEM;MRPL46
RNF103	20	RECQL4;MAP4K3;SERTAD3;PLAT;PARP16;CSF1R;C1QC;CSF1;C1QA;CEP290;CD4;TWIST1;ITM2A;TRAF3;DFNB31;SELPLG;ZNF248;KLHL9;CMKLR1;GAS6
FAM120B	19	AIF1L;SNAI1;RASIP1;SEMA3F;GULP1;EGR3;ENPP2;NOTCH1;TCF15;DLL1;GLUL;TSC22D1;CASKIN2;C20orf112;GRASP;PIK3R3;THBD;GIMAP7;CH25H
FHOD1	19	MIDN;ERRFI1;SERTAD2;HHEX;SESN1;ARID5B;PLA2G15;CDC42EP2;FAM214B;ARHGEF2;EPHA2;IER5L;PKDCC;IFFO2;LCAT;PIM3;CBX4;HOXA9;NAB2
TBRG4	19	EFHD2;ZMYM3;KIAA0232;PXDC1;CDC42EP3;CDC42EP2;NAGLU;KDM6B;PIDD;CBR3;CALML4;CKMT2;NOP2;KDM5B;FAM214A;ALDOA;STK39;C5orf51;SKIL
LARP6	19	C21orf119;UAP1;ETV6;FXYD1;SNRNP70;PPM1M;CCDC115;STX16-NPEPL1;ARRDC4;SMIM4;CTSZ;HDC;H2AFJ;CPQ;ALDOA;AL807752.1;ICAM3;C6orf226;CORO6
PCED1A	19	KCND3;PPM1F;ANKRD50;FZD4;TIMP1;EMILIN1;UNC119B;NRSN2;PTX3;ARMCX2;SNED1;GAL;IGFBP4;CBX6;NLGN2;C1R;MROH7;ZBTB21;MID1IP1
TYMP	19	BCL2L1;RARA;SRSF7;PPRC1;GRHL1;YPEL2;DNAJC27;NUAK1;PDIA4;GNG12;ADAM9;ZNF10;FES;WDFY1;USP31;FRY;ZBTB21;DACT1;BCL3
CRTC1	19	NUDT8;FHOD1;HPX;FAM76B;RRP1B;FAM214A;NOP2;MAP3K6;MCM5;ADCK1;NDUFAF5;GDPD3;LDLRAD2;PNPLA7;CREBRF;URB2;TMEM178A;KDM3A;COX14
RCL1	19	AMOTL2;CYR61;PELI3;RAB2A;MPP3;FAM166B;GLRB;C8orf4;RASSF4;KLF6;STX12;UNC119B;ETNK2;MAPT;RHOB;MUM1;LOX;MAPKAPK3;BCAR3
CELF2	19	STXBP6;RPL28;GDPD3;STON1;MPP1;SRRM2;SLC23A3;ACKR3;DPYS;BBS10;CCNG2;PRSS36;GPR133;ADA;TRIM47;MVK;PLEK;GAS7;DNER
CPSF6	18	VAMP1;YPEL4;PREPL;H1F0;CSK;TTC32;ZRANB2;PCDH1;CHPF2;FUBP1;OSGEPL1;N4BP2L1;NUDT13;ABCA5;SUV420H2;ZNF512;ZFC3H1;LUC7L3
PSMB4	18	PCK2;LRIF1;LAMA3;LTV1;ZNF691;PNISR;CD47;APOM;INSR;KAT2A;AGAP1;FOXRED1;FPGS;TMCO6;TTYH3;CDNF;SRSF11;SPG20
TNC	18	SELM;SAMD14;SLC17A7;TIMP3;KCTD15;EMILIN1;TMEM200A;C7orf63;CD34;WSCD2;LGI4;SPRY2;EBF2;TRPC4;P2RX1;DECR1;ITIH3;HSD17B6
NPDC1	18	CCNL1;ZNF248;HDGFRP3;ZRANB2;PNISR;TBCD;DOCK6;NEO1;CEP290;GLUL;AZI1;SGSM3;ARGLU1;GIMAP6;SLC1A1;NT5DC2;BTAF1;KDR
SPARC	18	WDR6;CDH13;AGL;FGD1;ACYP1;RASL10B;GPT2;FAP;SMO;EGFL6;LTBP4;TMEM43;MBD2;TRIP10;LY6D;CYP4X1;CHST7;ZNF512B
HIPK3	18	NHLRC3;TGFBR2;DNAH1;JRKL;VASH1;PCDH19;ZNF691;C12orf79;AP1G2;MKS1;SERP2;TMEM99;ZBTB48;KIAA0100;GART;C5orf54;SPR;ENOSF1
RAPGEF1	17	TSPAN18;CLIC5;APLNR;EMCN;PREX1;SLC9A3R2;NINJ2;WNK1;CCDC68;CRHBP;RAMP2;HSPA12B;HECW2;LAMA3;ATP9A;SLC6A6;MYO7B
UPP1	17	RGS16;PTGS2;MPZL2;C9orf40;CDKN1A;JUNB;ADAMTS9;TRIB1;IER3;IL6;ZFP36;MCL1;BST2;STC1;RNF122;ATF3;ARL5B
PLEKHG5	17	DNAJB9;WDR1;MAML3;SH3BGRL3;RFTN1;SELENBP1;NYNRIN;ECM2;MEOX1;FREM1;NTM;SLC5A6;ZBTB46;CDH5;MAN1A1;PIP4K2C;HSF4
PHF15	17	RASGRP2;EFHD1;CABIN1;CPEB4;SYNE3;ARFGAP1;NOTCH1;FAM46B;NR2F2;FOXRED1;ZNF22;PPARGC1B;CDC42EP2;GUCY1B3;PRDM8;SUV420H2;TBX15
BCCIP	17	ZDHHC17;CHD2;TNFAIP1;DNAJA4;QRICH2;TAS2R5;FUBP1;PCBD1;THRA;PDE9A;YJEFN3;SGK494;RBM14;SDF2L1;MTMR4;RNF122;CRIP3
MARC1	17	PGAP2;CD53;PLA2G16;HDGFRP3;ACVR1C;HADH;TDRKH;PCBD1;CYB5A;PEX19;FOXRED1;KIAA1107;MMP28;CALD1;DCST2;HSDL2;CIDEA
STARD5	17	RICTOR;LRIG3;CHD6;C20orf112;ATP13A2;SETD5;FYCO1;COL5A2;TYK2;ZMYND15;SRCRB4D;LTA4H;USP31;ARHGAP29;KDM3A;DNMBP;PHF3
MMP19	17	OXER1;RAB20;PHF21A;CALM3;ACP2;POR;PDE3A;MAPK13;CTSD;ESYT1;PSD3;STARD9;MCL1;FAM105A;IGFBP5;GYPC;MATK
PDLIM3	16	MYH11;ACTA1;TP53INP1;ACTG2;MB;BHLHE40;EEF1A2;MYL1;CKM;MYL2;MYBPC1;LGI3;PCP4L1;RYR1;TRIM63;TFAP2C
HSF1	16	FARS2;CEBPG;TSSC1;CSK;PRR26;TNFAIP3;ANKRD37;AKAP12;CREM;FOSL2;ITPRIP;ZNF644;PPP1R9B;IVNS1ABP;USP36;CH25H
PCTP	16	COPZ2;FMOD;CUTC;FMNL2;CCDC80;MKL1;EVC2;ZNF438;COL5A2;GAS2L2;BMP4;ARHGAP10;PPP1R16B;MAPKAPK3;SNX33;AGPAT9
DHX15	16	MAP1B;FBXO46;ZNF691;TACC1;B3GNT9;CELF2;AGAP1;DEK;RABEP2;DCP1B;MYSM1;EMP1;TNIP1;S100A10;HHEX;CENPT
OSGEPL1	16	ZMAT1;AAAS;SPEF2;MACROD1;TSPYL2;KANSL1L;SUN2;DCXR;AMICA1;ZNF581;TTC18;AQPEP;PTPRF;BCOR;ECHDC2;CFP
ADD3	16	HMBS;TRAF4;KLF16;ZUFSP;CHD6;KIAA0232;ADCK1;STARD9;BCOR;KDM6B;CREBRF;NR1D1;KDM3A;MTMR3;C15orf41;TSSC1
COASY	16	RASSF4;CNST;CEBPG;HSD17B10;HBEGF;CPNE2;MAZ;ELANE;ADAT2;CLIP2;CORO6;ZNF792;MFNG;FLYWCH2;ACY1;ARL5B
ADCY5	16	S100A6;CEBPG;JMJD4;GPT2;TRAFD1;ALDH1L1;RHOXF1;XYLT1;LDHD;FOXRED1;C10orf90;S100A4;C17orf53;CUL7;UCHL1;NXPH4
COL6A1	16	C10orf10;MESDC1;G0S2;AGL;SESN1;RARG;LDOC1L;PLEKHM2;RNF41;DYRK3;TRAM2;CC2D1A;NUDT18;FIBIN;KLF9;ZBTB16
PCGF5	16	ENKD1;JOSD2;PLXNA3;TLN2;GSAP;C10orf128;ZMAT1;TRMT13;YIF1A;TRPC1;GIMAP5;LGALS1;HSD11B1;FAM126A;ENDOU;GPSM1
SLC35A2	16	PREPL;IFT27;SGK494;MFSD6;SLC7A6;CADPS2;GRINA;CYYR1;ELK3;PDE9A;RNF38;CCDC93;TMEM8B;BTAF1;DNHD1;GUCA1B
SMG6	15	BBS9;NEURL1B;ARID5B;FAM43A;SERPINB5;TLDC2;TRAM2;RHOBTB2;PIK3R1;PIP;NAB2;CCDC85C;ZNF395;N4BP3;HIC1
CCDC51	15	PLXNB1;LRIG3;ANXA4;CABIN1;RPP25L;VASN;TWIST2;PRNP;DKK1;CORO1C;NAV2;ARHGAP12;DBN1;FBLN7;RAB32
BCAR3	15	HSPB7;SDC3;SERTAD4;ITPRIPL1;TSC22D3;RRAD;GNAZ;IRF2BP2;OLFM2;HPS6;SLC29A2;KSR1;COBL;ADAMTS18;DUSP2
SEC24C	15	MLYCD;PEX19;TRMT13;RCC1;ZNF691;MAZ;YPEL2;STX10;MKS1;PPP1R10;ZFP36;TSPAN18;MPV17L2;RNF122;ATF3
ZFAT	15	ANKRD53;AOC2;PLCB4;ASAH1;KLHL31;IER5;MRAS;SPEN;GPR64;GPAM;KLHDC8B;ABCD2;MAPKAPK3;SLC27A2;GIGYF1
BID	15	NUDT8;LBP;AOC2;P2RX6;CSK;PCDH9;FMNL2;ASPH;HSPB8;EGFL6;ZNF512B;PTPRS;CYP4X1;UCHL1;FBXW7
PNPLA2	15	ZNF444;PGAP2;XPO5;TPCN1;TBX1;PIGK;TRAPPC5;C19orf68;ITGA7;SLC25A22;TMEM160;LPL;C4orf48;MID1IP1;GPSM1
IFT27	15	MFSD8;RBM14;PLEKHG6;PGRMC1;PTGES2;SELENBP1;CD44;NAGLU;NOP2;ECM2;ZNF449;SPEN;WDR43;POLR2A;CEP57
SELENBP1	15	GPR153;FGFRL1;TMEM139;ALAD;ECHS1;NTM;SLIT3;ECM2;EGFL6;FAM109A;MFAP4;GLYAT;CLU;SNCG;S100B
SLC3A2	15	BAG3;SLC39A11;MANBA;PLD3;CCND1;WDR66;ZNF691;EMP1;APBB2;NLE1;FNDC4;TMEM140;PTMS;FMNL2;SAT1
TBX3	15	DOLK;PTPRN2;RPS6KA2;GIPC2;F8;PCDH1;CMPK2;ZNF362;PEAR1;CD93;ID3;CLEC14A;DUSP7;RIN2;A2M
RARA	15	ENPEP;MCM10;RASIP1;DLL1;C20orf112;SNRK;LGALSL;ANKRD35;TRMT13;AP1S1;TRIM25;B4GALT1;KIAA1211L;PHLDA1;SRGN
ZNF800	15	TLCD2;TSPYL4;SMIM10;FBXO41;UBA7;AC139100.2;MED30;CCRL2;KRTCAP3;ZNF444;PPP1R32;ATXN7;UBAP1L;PBX3;KLHL9
LHPP	15	MT3;DMRT3;MPZ;PLEKHB1;NRXN3;PAQR6;AGRN;PMP2;HMCN2;DUSP15;AATK;FAM101A;CADM2;NCAM2;BCAS1
UNC119	15	IGF1R;HHEX;LONRF1;KCTD15;PLEKHF2;UNC119B;NOVA2;TLDC2;HOXB6;M1AP;DTNB;ARHGAP10;LDOC1L;ADRBK1;KLHL9
ACSL1	15	TMEM8B;C3orf58;EFHD1;ADAMTSL4;ST6GAL1;KLHL42;AKT3;LRCH1;FHL5;SH3BGRL;PLAGL1;CALD1;HDGFRP3;PDGFC;PHLDA2
CYTH1	15	CSK;HLX;C20orf112;CLEC2B;ROBO4;MFHAS1;PIK3CG;NR2C1;ST6GAL1;EXD2;PCDH1;GIMAP6;MYD88;RGP1;STK38L
CST3	14	ZNF444;CEBPB;CEBPA;ZNRF1;PRR7;ZNF580;TRAPPC5;ANKRD9;CLEC11A;TMEM160;MYZAP;FADD;C4orf48;SOD3
PEMT	14	EGFLAM;F5;CCDC107;NNAT;LMO4;PRMT7;STAC;MYZAP;DIXDC1;C10orf90;LAMB3;ZFAT;EEPD1;HSD11B1
ADARB1	14	RERE;FBXO46;R3HDM4;RFX5;KHSRP;C19orf68;SLC2A4RG;RRP1B;FOXRED1;PGAP2;SMPD3;RBM14;GPSM1;GUCA1B
C1orf213	14	EPB41L1;ANKRD53;PMM1;EPHX1;PDE1B;PIM1;ASPH;TTC8;IRF2BP2;N6AMT2;GLYAT;KIAA0922;KIFC3;THRSP
MFSD10	14	SMURF1;CCDC136;CLASP2;FUOM;R3HDM4;PDIA6;SPR;SLC24A1;ZNF691;TMEM62;HPN;SLC6A6;PHF23;KPTN
ZBTB16	14	FAM102B;PPM1F;IGF1R;ATP13A2;PIM1;EXTL3;KIF26A;MFHAS1;PHF3;TNRC6C;NR1D1;CBX6;GIMAP6;ELF4
HNRNPM	14	NUDT8;NAGS;WNT11;SDCBP2;NOTCH3;ZNF581;STX10;SLC29A2;RRP12;STARD3;FADS2;TESK1;TESK2;MYO7B
RNASEH2C	14	BBS9;NFIB;THSD7A;PCED1A;SPATA2L;VAMP1;OGT;LDB2;TTC32;SETBP1;EBF1;ARGLU1;LUC7L3;POU2F1
TMEM88	14	AOX1;LTBP4;VIT;SELENBP1;CD34;CYP4B1;MASP1;DERL1;ITM2A;HERC5;PARD3B;MAPK13;FAM83G;CXCL14
CLSTN1	14	TSPAN18;ITGB2;MAN2C1;TMEM47;MTR;APP;GRK5;TBC1D2;WWC3;KIAA1107;CLEC14A;KLHL3;IFIT5;PTPRM
FAM122B	14	ADCY7;SERPINA5;FAM208B;CPXM1;THBS3;ADAT2;CILP;TRIP10;MGP;RHOBTB2;VIT;VIPR1;FGF13;TRIM3
AKAP8L	14	JMJD4;FUOM;NAGLU;ADCK5;MASP2;C16orf86;C7orf43;MFSD7;C1orf159;ARFGAP1;ZMIZ2;ARID4B;YIF1A;TMCO6
MYH14	14	EFHD1;NPTN;TBXAS1;ATP2A2;MINA;APP;EPHA3;HOXB7;RIT1;CEP290;ARHGDIB;SH3BGRL;TMEM47;DHX34
COL14A1	14	MDK;MRC2;NLGN3;DNMT1;PHF19;SH3GLB2;SMARCAL1;RPP25L;OGN;COL1A2;S100A4;S100A10;CENPT;DPP4
CD72	14	LIPA;RAB20;KYNU;TM6SF1;LRRC4;AMPD2;FLI1;KCNAB2;LAPTM5;ZMYND15;SH3BGRL;YPEL4;CD86;PARVG
IL16	14	CEP164;ST6GAL1;PRNP;CHPF2;EGFR;TRAM1;HPS6;ZNF853;CCR5;SGK494;GIMAP6;TBC1D10C;TMEM86A;GLTPD1
REEP5	14	ALPK3;HDGFRP3;B4GALT5;OLFM1;CYP4B1;WDR86;RELL1;SNCG;FGFRL1;MRPL46;PARD3B;MBD2;IGDCC4;P2RX6
RER1	14	HSD17B10;NDRG4;TDRKH;GRM2;SLC2A4RG;DNHD1;SGK494;S100A4;C10orf90;PLXND1;PMM1;MSC;ENOSF1;TTC36
PARP16	14	APMAP;PTX3;TIMP3;ACSS3;ZNF385A;FMNL1;ECM1;CILP;IGFBP6;S100A4;S100A6;TMEM87B;SUV420H2;ZNF512B
ANKRD37	13	EGLN3;NEDD9;DDIT4;PPP1R3G;BHLHE40;LRRC32;RLF;SLC2A1;C15orf39;ARRDC2;AFAP1;SLCO4A1;SERPINE1
P2RX1	13	ITGA8;PCSK1N;PCP4;RAB33A;NTS;DES;MCHR1;PROX1;COL4A6;EFHC2;DAB1;FZD10;PKHD1L1
CREB5	13	LRRC8A;FOS;NR4A2;ALDH1L2;PEAR1;RAMP3;NFKBIZ;ATF3;SELE;CYR61;PDE4B;RNF122;HSDL2
MTERFD3	13	PPP1R3E;ORMDL1;FUBP1;ZFC3H1;PTPRF;ZNF512;ING4;NLK;PLIN1;ATAT1;FAM219B;LUC7L3;C10orf137
TXLNA	13	SLC41A1;SCFD2;IFI16;ATF7IP;TPBG;FRAT2;HOXA4;ZNF853;MEF2D;ZNF462;KAT6B;SLC39A3;TSSC1
RASIP1	13	ZNF444;SDHAF1;CEBPA;ZNF580;NR2F6;CDC42EP5;TMEM160;YDJC;AGPAT2;UCN;HEBP2;SNAI1;CCDC85B
GSTT1	13	ZACN;SHFM1;GLA;APP;CPNE6;BMPR1B;POLR2A;SF3A1;MBD3;CIRBP;CLK1;TRIM44;OGG1
HES4	13	XPO1;DGCR8;KLHL26;BHLHE40;CDKN1B;ANO6;NAP1L5;C15orf39;ZCCHC3;ANKRD37;MEF2D;GRASP;HES1
LYNX1	13	BACE2;GPAM;KIAA1324;CASQ2;RP5-966M1.6;HAUS7;RBPMS;CABP1;ITIH4;SCNN1G;SETD1B;P2RX1;ARHGEF10L
HEMK1	13	ANKRD53;TDRKH;YJEFN3;GAS2L1;BBS10;MSH2;SLC2A4RG;MAOB;SGK494;PTPN3;STARD3;TRMT1L;GRM2
PRKACB	13	DOK2;ITGB2;LMBR1L;STAC3;GLIPR1;C3AR1;SPI1;C1orf162;LAPTM5;KIAA1107;NRROS;GPSM3;IQGAP2
DNM2	13	MYL6B;LTBP3;TPST1;ACD;ZNF251;EVA1B;SRRM2;ATP6V0A1;MACROD1;PPDPF;C3orf14;C4orf48;ZYX
SGK2	13	APMAP;DRAM2;TM7SF2;ACSS3;OSGIN1;MFSD5;KAT2A;NLE1;FPGS;C10orf90;GLTSCR1L;LENG8;THRSP
TGFBI	13	CHD1;ZNF865;ADCY1;CCL19;KHSRP;SPNS2;SYS1;BBS10;CCNG2;EZH2;AGFG2;FOXN2;NT5DC1
ATP2A2	13	ASB2;NCK2;B3GNT2;CKB;TESC;PLCL1;KL;PDE9A;OXCT1;CCDC85A;CMIP;CORO6;MAPRE2
THBS1	12	CCNL1;IL6;BTG2;FOS;NFKBIZ;ETS2;VEGFC;SLC25A25;MYC;SLA;ATF3;CH25H
RILP	12	LRP3;CEBPA;LTBP3;NR2F6;IRF2BP1;TTC36;UCN;C8orf82;HEBP2;ZNF775;CCDC85B;C15orf61
CD7	12	MVP;PIP5K1C;CDKN1A;NFIL3;CD69;RNF122;SH2D2A;USP36;FOSL2;HAS1;KLF9;DUSP2
IVNS1ABP	12	SCFD2;CEBPG;RTN4;ALMS1;RNF122;ADRB2;RAPGEFL1;MARS;ATF5;ADAMTS1;APOLD1;PER1
CABIN1	12	CACNA1H;KLF12;SORBS2;MUSTN1;CAMK2G;MCM5;C19orf24;MEF2D;MOB2;PLAGL1;HEY2;S100A3
TRIM29	12	SPINT2;PHF19;CELSR1;RHOV;ZNF750;CALML5;KRT5;EPS8L1;SPTBN2;ABI3BP;S100A14;PVRL4
AGAP1	12	MKLN1;UNC119B;EXTL3;DCLK1;FBXL7;HDX;UST;MCOLN3;CBX6;BAIAP2;AJUBA;ARNT2
COL18A1	12	EFNB2;TCF4;TSC22D1;ENDOD1;APP;S1PR1;KIF26A;TIA1;ETS2;THBD;PJA2;A2M
ARHGEF3	12	INPP5A;PJA2;RAB3IL1;PIP5K1C;SPARCL1;EZR;B4GALT1;THBD;MYL9;PPP1R14A;PARM1;PACSIN2
SEMA6A	12	SOX18;TSPYL4;TMEM121;SOX12;EGFL7;PPP1R35;CPLX1;ZNF444;FAM229A;DENND4B;TMEM102;C8orf82
MMP28	12	CHST12;PPP1R1B;MYRIP;DTL;ZRANB2;PRPF40B;PDGFC;PITPNM1;NHS;ZNF512;HEBP2;CKLF
PHLDB2	12	TLCD2;OSBPL11;PGAP2;LGALSL;SLC4A2;GAB3;C7orf43;GUCY1A3;PPP1R12A;ARRDC3;NDRG1;FEM1B
COG1	12	CHD3;BTG2;FMO4;FNBP4;ZNF691;CALU;STX10;SRSF7;RABGGTA;SRSF11;FAM229A;PTPRM
FKBP2	12	ORAI3;RPS6KA5;TMEM14A;LTV1;TNK2;CDC42EP5;C17orf59;TMEM79;NBEA;SMARCD2;C9orf116;UQCC2
DIXDC1	12	C20orf96;DUSP1;INPP5K;JUN;MYL6;YWHAH;PICALM;OXGR1;DAPK3;NES;GDF11;TAGLN
AQPEP	12	HSD17B10;ACVR1;FAM208B;UHMK1;CTSF;ATRN;ARRDC4;KIAA0408;ZBTB46;PANX1;CITED2;HTRA1
TMCC1	12	PTPRN2;IGIP;ZRANB2;ZWINT;TAS2R5;GNAZ;MFSD6;MEF2C;TSGA10;CTNNBIP1;ARGLU1;C10orf137
FLNB	12	TGFBR2;UTRN;ATP1A1;PDIA5;DSP;CCDC64B;IFI16;ERG;MFAP3;GRB7;DUSP23;TACR1
MBTPS1	12	KLF13;RICTOR;SPTBN4;NAA25;TAS2R20;RABGGTA;CAPN7;AKT3;SLC4A2;CHST3;PPP1R9B;RGP1
MDFI	12	RRAGC;RNASEH2C;DNPH1;H1FX;MFSD7;SCAND1;FBXL15;POMT1;TMEM259;RASAL2;HSPBP1;PHF1
DNASE1L1	12	EFHD2;KYNU;HEG1;PATL2;CD86;DVL2;CTSZ;TEK;TP53BP1;TSPAN7;FAM13A;MMP2
PSMF1	12	TRAF1;LYL1;CTSO;ITM2A;SMCR8;GSC;C3orf35;ARFGAP1;DFNB31;HEMK1;FAM193B;GDF10
ACADVL	12	ZNF444;SDHAF1;CEBPA;ZNF580;FADD;TMEM160;ZNF579;MYZAP;PDF;C8orf82;ZNF775;ZNF467
CPB1	11	SYCN;PGC;REG1B;CPA2;CLPS;CPA1;R3HDM4;KRT13;PLA2G1B;PNLIP;REG1A
SLC20A2	11	ABTB1;JMJD4;FUOM;ACSL3;SDCBP2;LTV1;ZNF449;QRICH2;SPG20;SHMT2;CRIP3
STX4	11	JMY;SLAMF9;CCSAP;NR4A2;CELF1;AQP9;NRARP;C19orf24;GABBR1;SETD5;TMEM51
SLC27A3	11	LRP3;SOD3;ZNF580;TRAPPC5;C1QTNF4;ZNF467;TMEM160;C11orf96;PRR24;CCDC85B;HSPBP1
NTRK2	11	RGS5;ACVR1C;AMN;GLIS1;CORO1C;C15orf59;SNCG;KIAA1239;UCHL1;DDAH2;CAV1
TMEM165	11	EDA2R;DPAGT1;IRF5;TAS2R20;SPR;KIF22;C3orf35;GNRH1;FAM13B;ZKSCAN8;PTPN6
CSTF3	11	ORAI3;ZNF248;AGL;PPFIA2;JRKL;ZNF691;ZNF189;CELF2;WDR34;DEK;ARGLU1
IQGAP1	11	HADH;DRAM2;TM6SF1;APP;RNF41;ELK3;PDK2;ATP1A1;MGEA5;UTRN;CTTNBP2NL
PNPLA7	11	SARS2;ORAI3;ISOC2;CREBRF;C10orf90;AGPAT4;ARGLU1;AP4B1;COX14;ODC1;HES6
PLIN1	11	HDGFRP3;ACVR1C;CCDC107;EFS;CRYAB;PEX19;SNCG;PTMS;HLF;PTPN6;CITED4
FEZ1	11	NINJ1;CSF1R;PRSS36;PIK3AP1;LGI2;GFRA2;CD200R1;PLEK;HPGDS;FOLR2;BLNK
TNNT2	11	FAM76B;PMP2;EMILIN3;RAP1GAP;DRP2;FA2H;ANGPTL7;BMPR1B;FKBP2;AATK;MPZ
STARD13	11	CD53;NPTN;MFSD1;VPS37D;KCNAB1;SASH3;PPP1R12A;SH3BGRL;ZNF10;FUCA1;PDE5A
DDB2	11	KCTD3;SESN3;ODC1;PRPF40B;C16orf86;TMEM165;MACROD1;PTBP3;GRAMD1A;NUDT18;KLHL9
RTN4	11	ANKRD53;TRAPPC5;GNG12;TMEM160;GLYAT;YKT6;FADD;ZNF750;SERPINB5;LDHB;S100B
HMHA1	11	CHML;CSF1R;SELPLG;P2RY13;ARHGAP30;CCR1;TNFSF8;EVI2A;F13A1;PLEK;PIK3AP1
MECP2	11	G0S2;NOP2;YPEL2;CDC42EP2;MLEC;GLUL;ZCCHC24;CCNG2;TRAM2;SCN4B;KLHDC10
UCK2	11	ITPRIP;UNC119B;NDST1;NOVA1;EBF3;HK3;CBX6;PPP1R16B;RGP1;RNF122;MEOX2
CYP26B1	11	DNASE2B;COMMD8;FBXO46;NFATC4;ELL;ALCAM;ZNF608;FOXRED1;PTMS;ABCA1;THOC6
SCRIB	11	KCTD3;OLFML1;SRRM2;SLC22A17;ODC1;STARD9;MAP6;MACROD1;PPDPF;S100A4;FAM134B
SH3GLB1	11	TDRKH;PGAP2;TMEM123;CCDC171;CCDC93;PHOSPHO2;MCM2;C3orf14;CUL7;MAN1A2;MRPL46
ABCB6	11	THOP1;NDN;CDC42EP2;FAM188B;TMEM25;ADCK1;TSPAN7;C15orf59;P2RX6;TMEM132C;HPD
ITGA6	11	PPM1F;IFT27;RPL28;B3GNT2;FNBP4;EXTL3;RTN1;TIA1;STARD9;GNG2;SLC25A30
PLXDC2	11	MLYCD;YJEFN3;CTSO;PDIA6;SPG20;CYP2E1;RHBDL1;AHSA1;PLCD4;SOBP;HTRA3
CLK4	11	TRAF1;IFT27;RAVER2;QRICH2;IER5L;PPP1R10;SERTAD3;CYP2E1;RBM14;TMEM175;PHF23
NFIA	11	GPAM;FAM168B;NAA25;FNBP4;EXTL3;CTSF;HRASLS5;PPP1R16B;YBX2;KCNIP2;FBXW7
MAP3K8	11	ZBTB10;RAB11FIP5;PRR26;MCM5;KLF6;IFI16;ACOT7;ELMSAN1;ACHE;CD99L2;DAPK3
MME	11	DCN;LTBP4;SLC39A14;MTSS1L;ECM2;CILP;EMP1;MYOC;CLU;CITED1;BSG
APMAP	11	IRF4;ZNF362;SPARCL1;C10orf128;TCEAL1;C7orf41;NOD1;RRP12;ARHGDIB;SUPT3H;FRMD3
MID1IP1	11	CCDC39;SOCS1;HSF4;GSTA4;UAP1;TRAM1;SLC7A6;TRIB1;GPR133;SLC19A2;CORO6
PMM2	11	KCND1;MDK;TMEM121;VIT;CCDC109B;FAP;GRK5;CSF1;ST6GALNAC1;GPR133;SPTBN1
TCAP	10	ACTN2;ACTA1;MB;CKM;CMYA5;KLHL41;MYL2;TNNC1;MYL1;COX6A2
VWA5A	10	EGFL7;DDIT4;BACH1;C15orf39;FRAT2;DEK;HGF;ITPRIP;RB1CC1;AGFG2
TPD52	10	CDH13;ENPP2;GNG11;RAMP3;PLEKHA7;APLN;PKP1;DARC;TFPI2;COL4A2
OXA1L	10	FBXO46;LTV1;PDE1B;CD47;PIK3CG;POLR2E;FOXRED1;SRSF11;CCNI;ATP5E
DTX1	10	FXYD5;UTRN;EFHD1;ARHGDIB;PTPRB;GRN;NAALAD2;PTPRM;ZFP62;TSPAN7
PPP1R16A	10	LGALS12;PCK1;PTPRF;DGAT1;HRASLS5;SLC31A2;GPD1;PLIN1;TMEM132C;KDM5C
HRASLS5	10	ANKRD53;EGFLAM;MCM6;WDR86;TNIP1;C19orf80;FMOD;DUSP14;MAPKAPK3;ZNF438
SORBS1	10	EPHX2;PTPRF;MYH14;PPARG;C7orf43;LPL;RBP4;CLCA2;CXCL12;REEP6
TNKS1BP1	10	DDIT3;AXIN2;TFAP4;ESR1;FNBP4;AKAP9;OSGIN1;POLE4;ARGLU1;BCL9L
SESTD1	10	SLC38A2;CCDC71L;SLC19A2;NEDD4L;RND3;SEPT9;PPP1R21;RPRD2;SKI;ANKRA2
SCML1	10	PDGFB;EXOC6B;HOXB3;PLOD1;RPS6KA2;ZFP1;MTPN;TMEM79;JMJD1C;ADRBK1
ANXA6	10	FAM76B;ORAI3;AP1G2;NAPEPLD;SERGEF;SLC24A1;POLE4;FBXL19;SPR;UQCC2
CD44	10	PHTF2;UPP1;PGAP2;GJA5;ACP2;TRAF1;LHFP;CYP2E1;MAMLD1;RBM14
TCF25	10	RARA;SREK1;PGAP2;MAMDC4;ANKRD9;LPAR2;FAM229A;DFNB31;PYCR1;ZNF10
PHF21A	10	TSPYL4;FHOD1;THAP2;ARID5B;CDKN2D;NOVA1;VAMP1;MASP2;TESK2;DHX37
EGFL7	10	SNAI1;MMEL1;FAM124B;SMAD1;ZNF750;GIMAP8;ICAM2;GIMAP4;RASIP1;GIMAP7
PATZ1	10	CEBPB;MAN2C1;C20orf24;MTR;HMGB2;HEXB;RHOXF1;KIAA1107;ARFGAP1;GART
TPRG1	10	CUTC;CCDC80;ECM2;KHDRBS3;MYO1B;MCM7;SPARC;GRAP2;NTRK2;SPTBN1
PMM1	10	HSPA13;PDGFC;LTV1;RRP1B;IRF8;PLOD1;CCNG2;PPRC1;PIK3IP1;DYRK1B
SNED1	10	CTSO;MFSD1;WNT11;CALHM2;ARFGAP1;CCR1;NRROS;CBX8;PIP4K2A;FAM193B
ITGB4	10	SOX10;MT3;ELK3;SOX8;PRIMA1;TSPAN7;PRKAR1B;CLDN1;SCRN1;UBAP1L
FRYL	10	TM6SF1;SLCO3A1;HEG1;SEMA5A;PDP1;UTRN;RNF38;UBAP1L;FAM53B;FURIN
TMEM2	10	ACSS3;CEPT1;CD69;HOXA5;HOXA3;TMCO6;ELF1;BAIAP2;PHLDB2;ARL5B
DPYSL3	10	KCNJ12;CHML;SPG7;PDE1B;ASPN;FAT4;FBLN2;GIMAP6;HMCN1;TESK2
TMEM100	10	ATIC;RARG;MRPS6;GLDN;C6orf106;EFS;IGFBP5;ADCK1;CDC42EP2;KLHL9
IL17RE	10	PLXNB2;ADD3;SNCG;UCHL1;SURF4;EGFL6;ARHGAP32;COX7A1;GFAP;HTRA1
NTM	10	ADAMTSL5;FAM166B;TTC8;FABP4;LAD1;MRPL46;CLU;CITED1;NCAM1;ZEB2
CAPG	10	CD52;CHST11;NCEH1;HSPA13;CHIT1;ST14;PALLD;DCSTAMP;LIPA;CD48
TCEA2	10	EPHX2;IGIP;PTPRS;C19orf68;HSD17B8;MON2;ADHFE1;TRIB2;B4GALT5;ECHDC2
ANXA1	9	RGS16;FOS;C16orf80;FOSB;RFX3;TRIB1;ZKSCAN8;DLX5;POU2F1
MED23	9	RPRD2;FMNL2;ZNF692;IER5L;ADCK1;DEK;SH3GLB2;ARGLU1;CENPT
SAT1	9	BTG2;FOS;JUNB;ZMYND15;THEMIS2;SLC25A36;MCL1;RHOB;APOLD1
MFI2	9	NEK7;NPR3;ASAH1;RGL1;SLC24A3;CD69;EGFL6;TGFBI;UCHL1
DUT	9	LRP3;FAM168B;RRAGB;ANKRD9;TMEM160;UCN;ZNF579;FADD;PDF
PPM1A	9	RCC1;DNAH1;MAP4K4;TMCO6;MKS1;STX10;TRMT13;TMEM132C;CIDEA
EPAS1	9	CCNL1;TRAM1;SKAP2;CPD;NFKBIZ;MTPN;MON2;RNF38;DMTF1
BIN1	9	TWIST2;PCYT2;XYLT1;TRAM2;VEGFA;ALDOA;ABCC5;EHHADH;NOL3
TEX261	9	VAMP1;ZNF224;ZRANB2;OGT;JUN;MASP2;ZKSCAN8;ZFC3H1;LUC7L3
DDX47	9	EFHD1;PELI1;MANBA;CELF2;SH3GLB2;AGAP1;DCP1B;ABCC5;LZTS2
LAMA4	9	SBNO2;SOCS1;ZNF703;RHOU;TENC1;NFIL3;TSPAN2;SEMA4B;SLCO4A1
C7orf49	9	NFIC;TBC1D9;SLC7A6;GAB2;SLC2A4RG;AR;SMARCD2;GPT;FGFR1
SOCS2	9	NFKBIZ;PDGFB;LYL1;ADAMTS9;CDKN1A;UBL4A;HOXB6;UGCG;IL6
NOSTRIN	9	MAP3K8;ITPRIP;KLHDC10;ZNF385D;TTC32;SPRY1;ARGLU1;DUSP1;RNF122
PRKCE	9	TLL1;CFI;C9orf40;CPXM2;RAB3C;ADAM23;DARC;PDE4B;SELP
AMPH	9	ELANE;CTSK;OMG;HENMT1;FAP;KCNQ1;LTBP4;MRPL46;IGSF21
PTPRS	9	TNFSF12;FXYD5;ZRANB2;PNISR;CDR1;MIB2;RNF182;PTMS;SORBS3
HMG20B	9	DAGLA;UBL4A;LRRC8A;THBS2;ATP13A2;PEAR1;RNF38;GLTPD1;TMEM51
CEP89	9	PTH1R;CNNM3;ELN;GALNT13;SPARC;MAMLD1;PIK3R1;COL6A3;TBC1D14
SLC35C1	9	LAMA1;ZMYM1;RASSF4;PON2;WDR86;TTC36;ATP1A1;FOSL2;MAPKAPK3
MTMR10	9	BCL2L1;SLC41A1;REM1;FBXL3;TCF7L1;LATS2;RHOBTB3;EPS8;SLC46A3
MEF2C	9	RASSF9;NR3C2;ITPRIP;CLK4;MYCT1;FAP;ZBTB18;FBLN7;FOXC1
ZBTB47	9	IL2RB;PEX5;ZFP36L1;CAP2;SRPX;FOXRED1;SNPH;NEXN;VGLL4
TMEM259	9	FBXO46;CLK4;FOXRED1;SLC16A11;KANK3;MYCT1;VASP;DAPK3;CCDC85B
STRA13	9	HOXC9;MRPL27;C1orf159;MRPS6;SPR;TRAPPC6A;POLE4;MPV17L2;PNISR
TK2	9	C20orf24;SLC7A4;DNAH9;GNG12;ITGAV;PHLDA2;CALD1;ECHDC2;COL6A6
SLC38A10	9	TJP2;SRF;AIM1;TEX30;RASSF5;RFTN1;AR;TK2;NPTN
SYNJ1	9	NPY1R;FCHO2;ITGAV;PALLD;SERGEF;C19orf24;MBNL2;CACNA2D1;TMEM47
MTA3	9	MDK;VIT;EFNA5;TRAPPC5;CPLX1;PXN;KIAA1199;ZCCHC2;ZNF438
AGPAT3	9	ACADVL;HSPB3;SNX8;RHOXF1;TCEAL1;DMPK;C1orf54;TEAD3;HEPH
RIN3	9	SHROOM3;AQP5;MUSTN1;TPM2;NPNT;RBM24;NTF3;CSRP1;DGKG
HAPLN3	9	SLC39A11;PPFIA3;C20orf112;STX4;CORO1C;AKAP12;GBE1;RFX5;TEAD4
ARMCX4	8	FAM168B;ORMDL1;PNISR;KHSRP;C19orf68;UBR3;CLK4;ZFC3H1
POLR2H	8	SREK1;NLGN3;FAM208B;PNISR;TIA1;C17orf59;TENM1;SRSF11
CHN1	8	ABCG1;PELI2;UNC119B;SOX12;CLIP3;TANGO6;EBF3;HEPH
TTC37	8	TRIO;PNISR;NT5E;SLC25A36;SRSF11;PLEKHO2;TRMT1L;ANKRD28
MIDN	8	MESDC1;EPB41L4A-AS2;TRAPPC5;TMEM160;MYZAP;FADD;UCN;C4orf48
DBNDD2	8	PTPRN2;FAM213B;CHST15;DPYSL3;C14orf80;KIAA1462;SYNE1;ZNF629
TRIM47	8	CEBPB;CEBPA;KLF16;TMEM160;KLF2;C11orf96;C4orf48;HES4
SIDT2	8	SDPR;ITPRIP;MED30;PEPD;PER1;FOSL2;GIMAP5;FRY
SCPEP1	8	TREH;FXYD1;CDC42EP2;ECM2;LDLRAD2;B4GALT1;MAN1A1;GSN
LGI4	8	ENKD1;PRDM11;ZBTB40;PPP1R10;SRSF11;KIAA0100;MPDZ;C10orf137
CFI	8	ARL13B;HDGFRP3;COL15A1;APP;SPG7;CD4;ELK3;MTMR3
BACE2	8	GPR3;MAP3K8;PELI1;LRRC1;KLF2;CLDN5;FOXC1;TMTC2
TFG	8	NR2F6;TRAPPC5;ANKRD9;TMEM160;CYBA;MYZAP;AL807752.1;C4orf48
ARIH1	8	CCR7;TJP2;ZRANB2;FUBP1;RIT1;SLC2A4RG;MCOLN1;RBM14
IL17RC	8	FAM76B;SUN2;FAM214A;ZNF692;PLEKHO2;ABAT;ING4;MAPRE2
TTC32	8	IARS;DCK;SLC7A6;ZFC3H1;GNRH1;C10orf137;FAM219B;C5orf63
MRPS34	8	LRP3;CEBPA;ZNF865;ANKRD9;C19orf68;PRR7;FADD;PRR24
SORBS2	8	CDK18;C12orf75;SH3RF1;CLEC14A;SMARCD2;PARD3B;SUFU;SPOCD1
KCNAB1	8	TBX2;SORBS2;TMEM35;SH3BP4;BCHE;FOXC1;RERGL;HTR1B
LDLRAD2	8	MPZL2;CDK17;ADAT2;HBEGF;MAST4;JMJD1C;PELI1;ZNF644
MAGI1	8	PMAIP1;PDIA4;MAP3K5;ZNF512;CCR7;PTPN3;USP31;ANGEL1
BIRC3	8	TM6SF1;MED21;RABAC1;PTPRB;UBAP1L;DMTF1;CTTNBP2NL;COL6A6
ADHFE1	8	UBXN11;PEX6;QRICH2;ECM2;FAM26E;SNED1;TEAD4;AEN
HTRA3	8	ANG;ZDHHC7;GLIS2;HIST1H4H;PISD;ACY1;C15orf59;HIST1H2AC
ARID1A	8	CTD-2369P2.12;RRAGC;CD164;NHSL2;QKI;UTRN;POLR2A;SF3A1
LIPE	8	CCDC107;KMT2E;CRYAB;AKAP9;TMEM25;SNCG;PDK2;CALD1
INPP4B	8	GAS2L1;BMP2;SLC38A2;TLDC2;MYL3;MKLN1;ELF1;CYP4X1
ACAP3	8	C20orf96;LYL1;ACP2;PNISR;ZNF692;AHDC1;ZSCAN18;PHF23
VAMP1	8	XPO1;ZRANB2;QRICH2;FUBP1;MASP2;ZNF512;PARM1;C10orf137
CDC42BPA	8	PGAP2;SCNN1D;NAA25;PCBD1;MLH3;CRY2;POLR2E;IARS
ADORA3	8	RNASE1;LYVE1;C1QC;GFRA2;CSF1R;C1QA;MAF;SIGLEC1
HECTD2	8	TSPYL4;NAPEPLD;CCDC68;GIMAP5;ZNF512;EED;C5orf54;C10orf137
PCDH1	8	ACYP1;PNISR;FUBP1;MASP2;ARGLU1;ATAT1;SEC31B;B4GALT7
STX3	8	TRIM63;RGS13;CPA3;KIT;CMA1;SIGLEC6;CTSG;MS4A2
CYP4X1	8	CNST;ANGPTL1;TACC1;SIDT2;FER;KIAA1199;MGAT4B;CORO6
C14orf180	8	RERE;GPAM;HOXD1;GNAZ;CHN1;GLT8D2;LDHD;HTATIP2
C19orf66	8	CNST;C1orf115;MYCT1;ID4;TRAPPC5;CCRL2;MYL6;TMCC3
CGGBP1	8	ZNF865;ZFHX4;NOVA1;PPRC1;NHSL1;CYP2E1;ABCA7;FAM229A
TNNI2	7	ACTA1;MB;CKM;KRT10;KRT1;MYLPF;MYL1
TPPP3	7	MAP1B;SLC40A1;C16orf80;FOSB;TNIK;LDB1;SESN1
TMUB1	7	ZNF444;SDHAF1;LTBP3;TMEM160;GRIN2C;KLF2;PRR24
MTA2	7	COMTD1;C1orf35;FAM229A;C8orf82;AL807752.1;CCDC85B;ZNF428
SLC18A2	7	FCER1A;RGS13;KIT;CMA1;HDC;CTSG;HPGDS
C7orf43	7	SDHAF1;CEBPA;ENDOG;TTC36;C8orf82;HEBP2;ZNF467
ZNF84	7	VAMP1;PGAP3;SESN3;ZRANB2;MAN2A1;GNRH1;ZFC3H1
CTC-429P9.4	7	SHFM1;CCDC84;PRR12;POLR2A;SF3A1;IFRD2;LUC7L
EML3	7	ZNF444;SDHAF1;CEBPA;KLF16;PRR7;TMEM160;ZNF467
PPP2R1B	7	ACVR1;ARHGAP20;HSDL2;WWP2;STK11IP;HNMT;RGN
MXD4	7	ERRFI1;UNC119B;KIRREL;CDC42EP2;ABL1;CBX6;SLC39A3
ZBTB1	7	NEK7;COMMD8;C19orf68;LIG4;DEK;KIAA1033;SPIN4
FAM160A2	7	SLC3A2;DUSP1;DEK;ARGLU1;RHOB;SEMA7A;KLHL9
GPT2	7	CCDC107;NUAK1;CHN1;PIAS1;CISH;CPEB4;NEXN
XPR1	7	PPRC1;MTPN;PPP1R10;ORMDL1;MBOAT2;CTSF;DNALI1
MED26	7	RARA;KLHL26;RRP9;SELPLG;PPP1R10;CST3;ARL4D
PCNX	7	ZRANB2;ZNF189;MASP2;TLR4;ARGLU1;GLS;LUC7L3
OGT	7	SGK223;HEATR1;MYCT1;KAT2A;TRAM1;PAXBP1;DEDD2
HDAC7	7	CENPO;PRICKLE1;HSD17B10;ZNF219;LPHN1;C16orf86;STX10
NDUFAF6	7	INHA;SPATA18;MFSD6;SMCR8;GNRH1;DDB2;CMKLR1
ITIH3	7	MYH11;LTBP1;PIP5K1B;KCNAB1;GUCY1A3;SORBS2;LRRC10B
MBOAT2	7	ADAMTS1;C1orf35;SH3D21;ZNF449;WDR81;KCNIP1;TBX15
ST6GALNAC6	7	ZNF444;SOD3;C11orf35;DRD4;TMEM160;MAP1LC3A;CITED4
GLDN	7	CNST;NSDHL;NR4A2;CCRL2;HBEGF;ETNK2;RNF122
NAV1	7	PCED1A;PLXNA2;KIF22;REV3L;MAP7;TBX19;PPP1R32
VSIG4	7	ERRFI1;PLD2;MAN2B1;GLYCTK;CD86;LAPTM5;GRN
ADNP	7	SRF;GANC;ZNF574;ARGLU1;CEBPG;CYP2R1;KLHL9
DAPK3	7	CDK17;MASP2;TRAPPC6A;STX12;FOSL2;LYRM9;RNF122
PALLD	7	C4orf48;DRD4;TRAPPC5;ANKRD9;TMEM160;FADD;PRR24
WNK1	7	ZRANB2;GNAZ;SMPD3;HIST1H1E;EED;ZFC3H1;NOL3
FLRT2	7	TJP2;IRF5;CALHM2;B3GNT8;VIT;CMKLR1;CLSTN1
TMEM126B	7	PHTF2;YJEFN3;MFSD1;QRICH2;SLC23A3;EIF2S1;CACNA2D4
AP006621.5	7	SNCG;PRCD;ALAS1;TNIP1;COX7A1;THRSP;SLC27A2
PDE5A	7	PLCB2;FILIP1L;KCNAB1;TMEM25;CD86;LMOD1;RTN4RL2
PML	7	IRF2BP2;BHLHE40;ZFP36L2;C15orf39;ARRDC2;PPP1R16B;PRR24
MRPL1	7	CLDN12;IFITM1;STARD13;LRRC1;ZNF385D;PIAS1;ADAM23
ECI2	7	C9orf16;SHFM1;ARHGAP20;SF3A1;MBD3;ASAP3;CD163L1
QKI	7	KCNC4;SOX10;MLIP;CALU;PRAF2;COL9A3;NCAM1
BICD2	7	DNAJB9;PIP5K1C;MIB2;DPYS;CCDC154;RBM14;RPRD2
NEDD9	7	DCHS1;BTG2;NR4A2;C8orf4;FOSL2;DUSP1;DUSP2
ZNF518B	7	ZNF628;NOTCH1;SH2B2;YIF1A;GART;GATA2;TUBE1
FAM50A	7	SREK1;MYH14;NAA25;PTPRF;AKT3;TMEM204;DHX37
CREBZF	7	RARA;FARS2;WASF1;GNG12;ARGLU1;CLK4;ECHDC2
TRIB2	7	IGIP;ADCK1;SPRY2;PER1;ANP32E;ZBTB10;BSG
PEX5	6	TRAF1;EPHX2;PGAP2;CYP2E1;SMPD3;RBM14
SEPHS2	6	CDR1;LRFN4;C1orf35;THOC6;RBM14;CCDC85B
PODXL	6	RPS6KA2;NDST1;TRAM1;PCDH1;GIMAP6;PPP1R16B
MPDZ	6	PNISR;AKAP9;MON2;MYSM1;ANKRA2;VPS13C
SMCHD1	6	BBS9;NEDD9;CD69;PER1;ARHGAP10;DUSP2
TPK1	6	H2AFX;HPS6;IQCG;NMT1;RBM14;SEC31B
TIAL1	6	NCOA2;MEPCE;S100A4;ATXN7;RICTOR;POU2F1
ZNF449	6	MFSD1;QRICH2;CDK17;PPP1R10;TNRC6C;CEP95
MARCH6	6	CTTN;ZRANB2;ZNF362;C7orf41;FBXL16;ARGLU1
ALS2	6	SRSF7;HMGB2;C3orf35;TBX19;CMTR2;KLHL9
COPZ1	6	KIAA1239;PTX3;VEGFA;C15orf59;DIO3;PMM1
PRKCDBP	6	IRF2BP2;CRYBB1;ELOVL5;DFNB31;HLTF;AIF1
RABGAP1	6	EFHD1;WDR1;TLN1;MEOX2;PDE5A;TAGLN
AGRN	6	ZDHHC17;CPD;PPARGC1B;PHC2;THY1;SLC43A3
SLC1A5	6	DRD4;ZNF865;CRYAB;AL807752.1;ZNF775;CCDC85B
RBPMS	6	PRR24;C19orf68;GDE1;FAM13B;PDF;CPSF4
KIAA1462	6	ZNF385C;PNISR;EGFL7;STK36;CLK4;KLHL9
ENPP2	6	MYRIP;ST6GAL1;COL18A1;TRIM25;SPARCL1;CTGF
RFNG	6	EXOC6B;TCEB3;PARD6A;CAPN1;C1orf54;S100A3
SENP3	6	FBXO46;APBA3;TRIM33;CCDC23;KHSRP;THOC6
CAPZB	6	RPL28;APBA3;IGFBP2;SUSD1;MDM1;SORBS3
MARS	6	CALHM2;CDC42EP2;IRS2;PPTC7;KIAA1107;PHOSPHO2
CYBA	6	ANO9;FGD3;HEXB;CD5;CTSZ;ITK
TANK	6	MLH3;SSTR2;FBF1;LCP1;PLEKHO1;CALD1
SMAD3	6	ULK1;ST3GAL5;ANP32E;TP53INP1;FBXO32;ASAP3
TPM2	6	ANKRD50;BHLHE40;MAP4K3;PCDH7;ETNK1;CALD1
C3orf55	6	OXNAD1;MFSD1;KRT23;ZNF750;LDHD;SCML1
ABCA6	6	LRP3;KIAA0232;PIDD;KIAA1107;TBX15;DYRK1B
STAT6	6	MYL6;TFRC;NOSTRIN;SNAPC4;SELP;PPP1R14A
MYL6B	6	ZDHHC9;ASPH;IFI16;SNED1;PYGM;FURIN
STK39	6	KLHL25;SLC7A6;LPL;AGPAT2;KIAA0040;GPT
MYBBP1A	6	ZNF521;THSD7A;ZRANB2;PDIA5;KIAA0232;CREBRF
LAS1L	6	WSCD1;NOTCH1;FST;MIEF1;PRKAR1B;PAFAH1B3
ZBTB21	6	C5orf63;ZRANB2;FUBP1;APOLD1;RNF122;LUC7L3
SESN1	6	CCND3;DENND3;MTUS1;PVRL4;FRY;TSC22D3
PPP1R35	6	SCARF2;EVA1B;TMEM160;ZNF358;CCDC85B;KLF16
LMF1	6	HCFC1R1;TMEM81;ZNF385D;FANCG;SRSF11;CCDC19
TP53I13	6	RAC3;SELE;YKT6;HRASLS5;PLCD1;DEFB132
GLCE	6	PPM1F;DUS1L;EXOC6;TMEM259;ADCY9;B9D2
TP53BP1	6	CTTN;MUM1;ZRANB2;CRYL1;SHOX2;SEC31B
NR4A3	6	ZBTB10;LRRC8C;HBEGF;LDLRAD4;GNA13;FOSL2
IFITM10	6	CHI3L1;RGL1;CTTNBP2;COLEC12;TLR4;DDB2
SELP	6	TSPAN12;CYYR1;BMPR2;TSPAN7;COL6A6;FAM171A1
HSPA14	6	ANKRD53;C20orf24;SPR;KHSRP;ESYT1;FOXRED1
VIT	6	PODXL2;ITGA10;C1QB;CCR1;SPARC;PYGL
ATOH8	6	ZNF444;DRD4;NR2F6;C19orf68;TMEM160;UCN
CAPN2	6	HMBS;MMP17;SPR;RXRA;ESRP2;ULK1
CLINT1	6	SARS2;PGAP2;QRICH2;YJEFN3;ARL15;RBM14
HEXB	6	SELL;TRIM33;MFSD5;C19orf68;MMP25;THOC6
EPB41L4B	6	LOXL2;BAI3;LMCD1;NPR3;L1CAM;COL6A1
CPA1	5	PNLIP;CLPS;KRT13;REG1A;PLA2G1B
QTRT1	5	GORAB;STX11;ZMYND8;C3orf35;ULK3
LRRK2	5	CCNL1;CDKN1B;KIAA0232;RALGDS;FRS3
NRP2	5	GIMAP5;MYCT1;PRR26;STK38L;HBEGF
MRPS25	5	C12orf57;MON2;SOD3;IRS2;RBM14
NCAM1	5	PCSK2;PLP1;TNNC1;MAL;L1CAM
PINK1	5	SLC2A4RG;SPR;POLE4;NUDT5;FKBP2
MARCH5	5	RCOR3;NR1D1;KCNT2;MFHAS1;ZUFSP
BNC2	5	SMO;PGAP3;CCDC115;SORCS2;HLX
NXPH3	5	CACNA1H;DBNDD2;REEP1;C20orf24;RBM14
NEK6	5	TMEM165;SHFM1;PTMS;SF3A1;ATP5E
NPTN	5	RHOB;DNMT1;PRDM1;ATP5E;LTV1
GBE1	5	MAP1B;NEK7;COMMD8;ACYP1;FOXRED1
THEMIS2	5	HBEGF;RBM24;VNN1;HSPBAP1;IL10RA
C9orf72	5	TCEB3;FAM76B;POU2F1;RICTOR;KLHL9
ICAM3	5	MYO1G;TRIM3;NKTR;TBC1D10C;CD48
ANKRD13A	5	TMEM123;ANKRD50;SGK494;APP;RNF38
ACACA	5	TF;OLFM2;ACSL1;AGPAT2;PRRT4
SIX5	5	QRICH2;TTC18;SPG20;LCN10;PYROXD2
LPCAT4	5	ETS2;GPR3;TSC22D1;PIK3R3;APOLD1
PLCD1	5	RFTN1;RNF150;ADAMTS9;ADHFE1;RNF38
CBLL1	5	ZFPM2;AGAP1;PPP1R35;KIAA1671;HEG1
ARID5B	5	NFKBIZ;MYO5A;EMP1;MCL1;ELOVL1
RPRD2	5	MRPS6;TSPAN1;PPAN;C14orf28;PIDD
SH3BGRL3	5	SRSF11;TRIM3;PTMS;G6PC3;PPDPF
UAP1	5	SLC25A25;PARVA;AJUBA;RNF122;PITPNM2
CFL2	5	FAM76B;FOXRED1;PRKCB;FCHO2;TMEM14A
LGALS12	5	EFHD1;KCNAB1;PTPN6;MASP2;TBXAS1
LPHN2	5	SOX18;TSPAN12;LFNG;HEG1;NOTCH1
NFIC	5	SDHAF1;OGT;A2M;ITGB7;CCDC93
GTF3A	5	ZNF444;SDHAF1;MACROD1;C19orf68;RBM14
CAPN7	5	FAM214A;BID;MFSD5;COL4A3BP;NOTCH1
ACAD11	5	GYS1;FAM166B;AP1B1;CDK17;ARHGEF1
SPON2	5	OLFML1;AGTR1;NAB2;ADAM33;GEMIN5
ARGLU1	5	HOXC9;VAMP1;PTMS;MASP2;LTV1
CLEC2B	5	EGR2;KLHL36;PPP1R16B;EGR1;CSK
PTPRB	5	CCDC153;MECP2;TEK;THBS2;ALDH1A2
CDC16	5	PLEKHO2;VIM;TP53INP1;SKIL;TICRR
PPP1CB	5	B4GALT1;PPDPF;C12orf68;SPATA2L;POLG2
SPATA13	5	WDFY3;ARHGAP32;CHD6;MTMR3;AQP9
CDK1	5	CDCA3;TPX2;SPAG5;NUSAP1;AURKB
MAST4	5	C15orf39;PHF7;CCBL1;GJA5;NMT1
ABCG1	5	C10orf10;GPR3;PIK3R3;HOXB2;NEURL4
GABRE	5	ZFC3H1;SPR;CTTN;TBXAS1;NAGA
TPR	5	KRT2;FOXRED1;HEXB;KRT1;KRT10
CHAMP1	5	CENPV;TEX261;FAM198B;TSPAN7;PDE1B
NFATC1	5	UBA7;UPP1;MACROD1;HIST1H2AC;ZNF449
ARHGAP24	5	CBX6;MPPED2;SYNE3;WDFY2;KCTD15
SLC12A9	5	ZNF691;STX10;TANC1;CTC-786C10.1;TUBE1
NOVA1	5	PTX3;ANGPTL5;LTBP4;TIMP2;SLC20A1
DENND1A	5	FMNL2;FUZ;SLC25A36;DDO;A2M
TTI1	5	SMAD4;PPP1R18;CTD-2369P2.12;MAPK8;TMEM81
PPP6C	5	HDAC9;TRMT13;GUCY1A3;EFS;CALM1
ZNF511	5	CORIN;POLE4;PPRC1;SOX13;HOXC6
HSPB11	5	SCN4A;EED;HSD17B10;C19orf80;ZRANB2
SDR39U1	5	KIRREL;DYRK3;TMEM121;ELFN1;ZBTB47
SEPT6	5	MNDA;TRAF3IP3;SLAMF8;CD48;GPSM3
FZD6	5	CREBRF;PNISR;UFSP1;IER5L;S100A4
WHSC1L1	5	MTPN;SCML1;SERTAD4;SGK223;GNRH1
EIF2S1	5	FAM69B;CCR10;SLC35G1;RASSF4;HRC
SLCO4A1	5	KAT6B;GIMAP7;RNASEH2C;RAMP3;TEAD4
UBP1	5	C19orf66;RAP2B;TKT;FCGRT;SKIL
LTBP4	4	ZNF444;TMEM160;CEBPA;LTBP3
PNP	4	EGR2;EGR1;RGP1;SLC25A25
PTS	4	AIF1L;ENPP5;DCUN1D4;ETS1
IRF2BP2	4	TMEM160;CEBPA;ZNF865;HEBP2
TCEA3	4	OLFML1;TIPARP;ECM2;PDGFRL
C12orf39	4	CDR1;ALDH2;ACVR1C;NRIP1
UBN1	4	COL5A3;CELF2;SH3BGRL3;PPL
SEC61A1	4	CEBPA;ZNF865;IRF2BPL;ST3GAL4
SH3KBP1	4	MTSS1L;ITM2A;SLIT2;OMD
STARD9	4	TRIM33;PDGFB;POLE4;FAM208B
ARHGEF10L	4	HCLS1;IL10RA;CFP;SLCO2B1
NR2C1	4	ARGLU1;FAM76B;FBXO46;PNISR
DNMT3A	4	SLPI;ARL13B;ABCA5;TRIP10
ZNF423	4	FAM180B;ITGA11;HAS2;GAS7
EPS8	4	ZNF574;MTMR3;ATP5E;POU2F1
SPHK2	4	INHA;DCXR;PCYT2;DGCR8
TNNC2	4	CKM;ACTA1;MYLPF;MYL1
CLEC4A	4	DOK2;CTTN;PLEK;LST1
GPD1L	4	PDGFRA;ADAMTS15;TCF7L2;BICC1
ANGPTL2	4	PLXNB2;SREK1;BBC3;CTSG
PLOD2	4	ZNF691;ZHX3;COMMD8;TMEM14A
WRNIP1	4	ZNF579;CEBPA;C1QTNF4;ZNF580
NCBP2	4	COX7A1;MSH2;LAMB2;SDC3
TIMP1	4	KRT13;XPR1;CTC-429P9.4;LIPF
TWIST1	4	MESDC1;CPEB4;ABCB11;DGCR8
KIAA1217	4	LYRM9;CCDC115;SRSF11;HPN
HSPB7	4	ITIH1;PTGER4;LAMA2;IRS1
BBS1	4	C19orf66;OSGEPL1;KCNAB1;DIAPH1
NMT1	4	MTSS1L;ANGPTL5;AJUBA;KCTD11
FN3K	4	NR4A2;PRR26;MTFP1;ANKRD37
SCARB1	4	RIPK3;EHD4;ESAM;SH2D3C
PALMD	4	PNISR;CEPT1;GNG11;LRCH1
C10orf137	4	TRMT1L;C5orf54;OSGEPL1;HEG1
ABCC3	4	PEX19;ODC1;ISOC1;TTC36
GNPDA1	4	RASSF5;UAP1;NOC3L;FAM208B
MMP2	4	CD163;SLCO2B1;VSIG4;SLC1A3
TSC22D2	4	FBXL19;IRF2BP1;PTMS;KLHL9
IP6K2	4	CENPT;SETD5;SLC26A6;ARNT2
VDR	4	TICAM1;ADAMTS15;SLC25A27;PHYHIP
TMEM80	4	C8orf46;KHSRP;CDK17;NAALADL2
ACAA1	4	TMEM165;PRR24;APBB1IP;KLF2
ACADM	4	FOXRED1;DEK;FCHO2;ZEB2
ACVR2A	4	ZRANB2;SPIN3;HOXA9;GNRH1
CAMK2D	4	STARD9;PRCD;PPL;NUDT16L1
TRIM35	4	PPP1R9A;EPM2A;RXRA;MYL9
RNF166	4	CCDC88B;MTMR3;RGS14;SLAMF1
PREX2	4	DAGLA;HBEGF;VCAM1;ARL5B
VPS13B	4	TMEM9;PGAP2;CAPN3;TMPRSS5
CYFIP2	4	DES;CNN1;ACTG2;PDLIM3
SNX8	4	QRICH2;SLC38A10;C19orf68;NRGN
HNMT	4	DAGLA;BAIAP2L2;SERTAD4;SOD3
AUP1	4	PDE1C;MGEA5;SLC22A15;PTPRU
SLC9A3R1	4	HOXB2;TMEM160;C1orf35;CCDC85B
SOS1	4	PIEZO1;HSD17B10;PGAP3;SESN3
NELFE	4	R3HDM4;PLA2G15;PLA2G4A;PLEKHF1
ARRB1	4	BCL9L;LYL1;SPARCL1;BCL2
COL27A1	4	SLC7A6;DYRK1B;SLC39A14;RBM14
TACC1	4	RERE;CCR10;PER1;IER5L
NCF4	4	CERS6;CCR1;CYBB;CD72
PMEPA1	4	PLXNB3;MYEOV;RHOXF1;CITED4
DECR1	4	PCCB;HTATIP2;E2F1;PRMT7
SLC35F5	4	KRTCAP3;FUBP1;ZFC3H1;LUC7L3
C17orf72	4	HCLS1;TMEM63A;BCL6B;ZMYM3
FAR2	4	NOSTRIN;EDEM2;TSPAN7;CYYR1
ACSS2	4	ZNF865;FBXL15;CCDC85B;FAM229A
PLSCR1	4	CCDC9;TMEM87B;ETNK1;CPEB2
KCNMA1	4	FAM13B;TEX30;CTXN1;FABP3
PLD1	4	PSMD14;SLC20A1;PRNP;TMEM245
LNX1	4	TIA1;ABCG2;MEF2D;CDC7
RNF217	4	HIPK3;SMARCA1;SEMA4B;TMEM165
EPC1	4	HMBS;NCOA2;MRPS12;INPPL1
CBLB	4	ZRANB2;C15orf61;NCKAP1L;TSPAN5
CCDC109B	4	ACLY;PDHA1;DLAT;CLMN
HEBP2	4	MYO5C;PCK2;PRRX2;BZW2
IFI16	4	NR3C2;MLEC;MCC;SGSM3
CCDC107	4	TSHZ2;RBP4;DYRK4;LPCAT1
ASB1	4	TRPV2;FUOM;ROR2;ASPRV1
C1orf52	4	DLL4;MSX1;CYTL1;KLHL31
SLC10A3	4	TMEM178A;HSD11B2;TTC18;TMEM135
AKT1	4	LIG4;RGL2;FHIT;TMEM62
UBE3B	4	HDAC9;PCYOX1L;FAM160A2;FKBP10
UBE2Q2	4	HLA-DPA1;HLA-DRA;CTTN;SGK494
RASSF5	4	ABL1;ZCCHC3;MEIS1;DNER
PHPT1	4	SLC25A22;TNK2;UCHL1;UQCC2
SLC22A17	4	SPTAN1;ITPR3;EVC2;LEO1
POGK	4	UNC119B;EGR3;TIAM2;ARHGAP10
FGF13	4	CHCHD10;EMILIN3;KLHDC8B;ARHGEF9
SMAP2	4	STXBP2;FMNL1;AGPAT9;SLC27A2
GRASP	3	RASIP1;KLF16;C19orf68
NCALD	3	NFKBIZ;FOSB;SLC25A25
MED7	3	C5orf54;FAM219B;ZRANB2
TNFSF12	3	PTRHD1;ROMO1;UBAP1L
HNRNPH3	3	ZRANB2;CBR3;RBM14
CLEC10A	3	SERTAD2;G6PD;SERTAD3
MPP1	3	ARRDC4;PDLIM4;PPTC7
LENG8	3	MTPN;LUC7L3;SLAIN2
KIAA1199	3	MAMDC2;CD9;ARNT2
HECTD3	3	RUNX3;CD7;CD69
C1orf123	3	TMEM79;FGGY;EXOC6B
GSPT1	3	SMURF1;NEK7;ASPH
PPFIA1	3	MON2;KIF26A;VPS13C
RAB34	3	GPSM1;CCDC85B;CLEC11A
XBP1	3	UCN;ANKRD9;CLEC11A
NDRG1	3	STC1;PRR26;ARL5B
PRDM1	3	PER1;TSC22D3;CD69
MYL3	3	TNNT2;MYL2;TNNI3
DPM2	3	PGAP3;CCDC115;KLHL9
ARHGAP12	3	NAV2;NOP2;HDAC4
SETX	3	ZNF691;CADPS2;OGN
SDF4	3	TMEM160;TRAPPC5;C1QTNF4
STIM2	3	KCTD13;C5orf54;KANSL1L
ATP5E	3	SLC4A2;SRSF11;LTV1
PIH1D1	3	PCDH1;GIMAP6;KLHDC1
RALGAPB	3	ABI3;FRAT2;RASIP1
RBPMS2	3	ZNF444;TMEM160;ZNF579
SNAPC2	3	FAM229A;A2M;ANKRD9
DOCK2	3	UQCRQ;FAM19A5;SCARA5
RAB11FIP5	3	SDHAF1;TRAPPC5;ANKRD9
DYNC1LI2	3	EFNA5;GPD1;HEATR1
TMEM123	3	GSTZ1;RPL28;KRT4
NAA25	3	ZDHHC23;TANC1;EXOC6B
PFKFB3	3	AR;PRR24;CEBPD
CNST	3	MTPN;ZRANB2;CLIP4
CWC15	3	NPEPL1;SESN1;ASTE1
SH3BGR	3	ILK;WDR1;MYL9
SCN4B	3	KCTD3;THBS2;TBX15
POR	3	MAP2K3;KIAA0232;RHBDL1
ZNF691	3	CEBPA;CUL9;ENTHD2
CDC42EP4	3	FBXO46;KHSRP;SLC24A1
PPM1M	3	EPHX2;CDK17;FOSL2
LRIF1	3	C11orf35;LY6D;PPP2R5B
MAOA	3	LRP1B;CLPB;NAGLU
UBE2G1	3	RARA;TMEM160;ANKRD9
DMXL1	3	CEBPB;PPP1R10;CLK1
FAM188A	3	C11orf84;TRIM3;ADAMTSL1
PKP1	3	GRASP;EXTL3;ABAT
ZNF740	3	PRRT4;FAM219B;FNBP4
KTN1	3	SRSF11;NR2C1;MON2
EDNRB	3	SH3BGRL;TRAM1;NR2F6
DNMT1	3	PCK2;POLE4;ATP5E
NARS	3	ARGLU1;MFSD8;LCNL1
PPP1R9B	3	HOXB2;HEBP2;CCDC85B
GPATCH2	3	SLC2A4RG;ATXN7;SLC1A5
ANKS6	3	AKT3;ECHDC2;TTC36
SLC19A1	3	DCHS1;NDST1;PTGER4
PTPRE	3	EGR2;MEPCE;SASH3
AGTR1	3	ZNF444;ZNF580;CEBPA
PRR16	3	GORAB;CCDC80;ECM2
C7orf55-LUC7L2	3	SLC7A6;CORO2B;MGAT4B
PPM1G	3	KCTD13;SDHAF1;MYZAP
TP53I3	3	GCA;CCDC176;CACNA2D4
FAM65B	3	CMTM2;ARG1;SELL
CLDND1	3	SLC23A3;YJEFN3;ZNF449
BRD4	3	PWWP2B;CBX4;HEXIM1
TMCO3	3	CLU;STON1;ARL5B
PTTG1IP	3	ARHGAP32;TIMP3;CDC42EP1
DYSF	3	TMEM47;FEM1B;TMEM123
RIT1	3	MXD1;MAGEH1;CAP2
CAMTA2	3	ALDH1L2;AP2S1;HSD17B10
NSD1	3	SMC1A;STARD9;RAD54B
MKL2	3	SLC25A22;RPLP2;ACVR1C
PTK2B	3	CD53;TANC1;LAPTM5
SNRNP25	3	ZNF581;FER;TTC12
RCAN2	3	IGSF6;CKAP4;GPR176
GEM	3	SLCO4A1;STC2;PRKCE
FGFR1	3	LRP3;DRD4;CCDC85B
ACKR3	3	LGR4;AUTS2;NTN1
ZNF580	3	TMEM160;ENDOG;ZNF467
KLF3	3	PLK2;PMAIP1;GNA13
DPP7	3	NOVA1;CTC-241N9.1;CCDC85B
DCXR	3	ABCC5;PSRC1;UXS1
NGLY1	3	FAM160A2;PGP;FMO4
UBL7	3	C19orf48;TLDC2;GDF10
THBS4	3	FRY;PPT2;HPD
NOTCH4	3	FBXL19;EFNA1;FAM168A
RNASEH2B	3	PID1;HPGD;RBM14
ENTHD2	3	PNISR;SRF;FAM208B
RCC1	3	EAF1;GMDS;XPO5
HOXB3	3	CCDC150;SLC24A1;ACSL5
GATM	3	ITIH3;PRKAG2;PPP1R12A
SIGIRR	3	MON2;LCN10;STOX2
SLC5A6	3	BYSL;PPRC1;PEAR1
DMKN	3	LY6D;CTSK;KRTDAP
ITM2A	3	FOXRED1;DEK;SRSF11
TBXAS1	3	C1QC;C1QB;EBI3
RND3	3	CXXC1;BMP4;KHDRBS3
AGAP2	3	SELENBP1;ADAMTS18;ZNF275
ZNF623	3	DUSP7;PHF23;CBL
NBAS	3	HIPK3;C1orf122;GLI4
ACP5	3	CYP27A1;ARHGAP29;PRNP
TMEM201	3	C15orf39;POMT2;ARFGAP1
MYO18A	3	ESRP1;KIF26A;TEAD4
PIK3R3	3	ALPK3;CPD;STAC
MALT1	3	FMNL2;ARMC12;RABGGTA
LNPEP	3	NLE1;DUSP16;CETP
IFT140	3	ZNF691;TRPC1;MACROD1
MOGS	3	HEBP2;ROR1;PRDM11
AGBL5	3	TEX261;SMPD3;MASP2
PPARG	3	CD99L2;HSPH1;GAS2L2
MMRN1	3	PTPN3;ABCG2;BBX
FIGF	3	TRAM1;DCAF15;ABCA8
MYO1B	3	UCHL1;ACVR1;PRRT2
ECM1	3	CPQ;GPC3;SLC2A13
PQLC1	3	CFD;CD69;PCOLCE2
COQ9	3	LYRM9;KLHL26;CRY2
LRP1	3	PDGFC;SEC31B;FRS3
PPP1R7	3	CPD;CFDP1;NSUN6
RGS14	3	ARHGAP4;VAMP8;AIF1
SETDB2	3	BCL2L1;MYO15B;SEMA6D
SCAMP2	3	ARGLU1;DPAGT1;SRSF11
CAPN5	3	ZNF503;NOTCH1;TNFAIP2
RB1	3	ZNF691;C5orf54;ELL
RNASET2	3	SLC15A3;TOB1;UCN
TM6SF1	3	SCRIB;SLC23A3;MYSM1
DKK3	3	C3orf58;BCL6B;MANEA
HIC1	3	PPP1R3G;COX14;ADCY3
MBNL2	3	PANK1;ENDOD1;C19orf18
N4BP1	3	HBEGF;SPHK1;RNF122
CFD	3	SDHAF1;CDC42EP5;TMEM160
BAIAP2	3	KCTD3;LAMB1;NOTCH4
CAB39L	3	MAMDC2;C1QTNF7;ILK
ULK2	3	AQPEP;CEBPA;TTC36
RNPEP	3	ZNF580;FAM229A;ZRANB2
AKAP8	3	TENC1;PNPLA6;TTYH2
FAIM3	3	LYSMD2;ADCK4;TCEA3
ARHGEF9	3	TBX18;ST5;PDLIM3
ALAD	3	SELENBP1;TIPARP;ASPH
BTD	3	PPP1R36;LRRC16A;SLC38A10
HMCES	3	LRRC32;AIM1;FAM219B
ZNF467	3	ANKRD53;CSTA;SCARF2
DENND2D	3	HMHA1;CD3E;RLTPR
LIMCH1	3	TMEM160;SLC7A6OS;CISH
MTRR	3	CAMK2D;SERTAD3;FOXC1
UBXN1	3	ARGLU1;OGT;SNTA1
C5orf58	3	CCNL1;UNC119B;AUTS2
HCLS1	3	MIDN;VNN3;RAB30
HPGD	3	BCORL1;RB1CC1;SMARCD2
MIF4GD	3	USP24;SMCHD1;ACP2
HIRIP3	3	RPP25L;SRSF11;FAM229A
MLPH	3	BCL6B;EFNB1;ADCK1
WDR54	3	CD163;CD93;SPARCL1
EPB41L3	3	BCL9L;MACROD1;GLI4
HAS1	3	UNC119;G6PD;PPRC1
CPSF4	3	CENPV;FAM198B;CUTC
PDE8A	3	KDM3A;CDK17;DOK4
IGFBP7	3	DDX17;NAA25;SLC1A3
MEPCE	2	KHSRP;C19orf68
TPRA1	2	SDHAF1;CEBPA
CRIM1	2	MAP3K8;HIST1H2BG
IL1RL1	2	CPA3;DUSP6
SAP30L	2	ING4;PHC2
FOXRED1	2	KHSRP;C19orf68
SLC52A2	2	AHSA1;TRAPPC6A
PLOD3	2	ZNF691;KLHL9
CDC25B	2	CCM2L;ADAM15
RNF146	2	ARGLU1;KLHL9
PVR	2	TMEM160;PRR24
ASAP2	2	C5orf54;CCDC68
MDH2	2	CTC-429P9.4;RPL28
ANKRD9	2	TMEM160;TRAPPC5
APBB2	2	HEBP2;TDRKH
FOS	2	HIST1H2AE;SRSF7
LMNA	2	CEBPA;ZNF358
TSPYL2	2	GSTZ1;CTC-429P9.4
INPP5K	2	GDF11;CTSO
HNRNPLL	2	FOXRED1;C19orf68
ZNF174	2	TMEM160;ZNF775
ARHGEF11	2	PIDD;HES6
GBP2	2	SRSF11;KRT10
LRRC14	2	ZCWPW1;AMOTL2
MOSPD3	2	TP53I3;COQ10A
MX1	2	SLC5A6;DSP
FSTL1	2	RAB3A;NLGN1
SLCO3A1	2	MFSD5;ARID5B
MITD1	2	YJEFN3;SMPD3
SMAP1	2	LYRM9;KLHL9
TPP2	2	LDB2;LRRK2
ESAM	2	SMTN;HEG1
PRKCH	2	WDR52;TMEM123
MFSD12	2	CORIN;JMJD4
TBX2	2	ANKRD13D;USP2
ST7	2	TLE2;ITGA7
SNX24	2	CLEC10A;C9orf16
RBM42	2	PIDD;CLDN15
WDSUB1	2	PDF;ENTHD2
DNM3	2	CDC42EP3;SMO
TNPO2	2	CLUH;HLTF
ADA	2	SLC6A2;TMEM240
EMILIN1	2	VSIG4;KCNAB1
HDLBP	2	FAM168B;PHIP
HSD17B4	2	ARGLU1;CSTA
KIAA0408	2	ARRDC4;FAM229A
C6	2	SEMA3A;ZCWPW1
FRY	2	MVB12B;MAP3K8
TUBA4A	2	ITK;CXCR4
CYTH4	2	SDPR;TMCC3
FAM208B	2	TGFB2;WDFY2
COL4A5	2	ITGA8;CASQ2
NT5DC2	2	C15orf39;KLHL26
GAB1	2	ARGLU1;FANCL
NEK9	2	FAM174B;MAN1A2
SULF2	2	S1PR1;MYH9
ANO8	2	AHDC1;PLEKHF1
BBS7	2	ADORA3;ATP8A1
GUK1	2	LRP3;LTBP3
FAM150B	2	CEBPA;KLF16
RAP2C	2	RUNX2;TOP1MT
N4BP2L2	2	LRRCC1;APBA3
NPNT	2	PISD;TMEM123
ZNF579	2	ROMO1;TRAPPC5
SEMA4D	2	MFNG;CD2
PPT2-EGFL8	2	PGAP2;MBP
SAP18	2	UPP1;TNIP1
ETS1	2	ARGLU1;PNISR
VAC14	2	RELL1;LEPR
TNNT3	2	VIT;SLC6A15
HSPA12B	2	NINJ2;UBL4A
USP53	2	H1F0;RHBDL1
C18orf32	2	LRP3;DRD4
TMEM164	2	CLMP;ARHGAP20
ATXN7L1	2	MYL6;CCR1
CNNM3	2	TRMT13;DNAJA4
ERN1	2	ARGLU1;HSPA2
CD53	2	CCR1;NCKAP5
CBY1	2	ABCC5;H1F0
HID1	2	TP53INP1;RNF122
CLPB	2	BRPF3;PTPRM
MTCH1	2	VASH1;CHTF18
PTPN23	2	C6;TMEM25
MAP1A	2	RCSD1;ARHGEF17
MCOLN1	2	SMCR8;PLEKHM2
FLI1	2	HECTD2;MTPN
B3GNT2	2	FCHO2;OPLAH
MRC2	2	MAP4K3;CBR1
CNR1	2	C10orf10;SPRY2
SRA1	2	RP11-1070N10.3;SPRYD3
COX19	2	AAAS;NRM
EIF4E3	2	L3HYPDH;MESDC1
DDX42	2	RICTOR;KIAA1033
OLFM1	2	WDR54;DOT1L
C3orf18	2	CMKLR1;SMYD3
SMARCD2	2	KLF13;COG7
OSR2	2	CENPT;PTGIR
USP40	2	SREK1;DNMT1
HIVEP3	2	TJP2;RUNX1
DDX41	2	MITF;FBF1
MESP1	2	ZNF444;CEBPA
DDX39A	2	SAT1;TIPARP
COG7	2	FAM174B;SPRED2
RASSF1	2	RHCG;PIK3R3
DOCK6	2	FOXC1;KLHL31
SGIP1	2	CHAC1;LAMC1
BSCL2	2	SLC3A2;C19orf68
TEAD1	2	PHLPP1;FBXO46
USP24	2	FBXO46;PITPNC1
L3HYPDH	2	C15orf52;ORMDL1
NSFL1C	2	STK38L;C8orf4
ME1	2	LGALS1;TLR4
COA6	2	HBEGF;SPR
GPR133	2	SEMA3D;TMEM123
MARK2	2	CSF3R;CFP
CIRBP	2	DMD;SLC43A1
MSH6	2	TNMD;CNST
ARSA	2	WDR86;SLC27A2
CLTCL1	2	SLC3A2;WNT5B
KHDRBS3	2	FBXL19;ST6GALNAC1
C9orf3	2	PRR24;CCDC85B
ZFPL1	2	PTPRE;CCDC9
ARL6IP6	2	FOXRED1;ATP5E
FBXO3	2	ZNF750;CALML5
SAMD4A	2	C17orf59;HHEX
LONRF1	2	UCN;GNG11
SLC1A3	2	MCOLN1;IRF5
KIF13A	2	SERGEF;KLHL9
STAMBP	2	UNC119B;CRYBB1
CMTM3	2	SDHAF1;MAP7D1
TCF12	2	ARHGAP35;RTN2
DLC1	2	SELE;USP31
RHOBTB1	2	MIDN;STK36
SIPA1	2	ZNF444;TMEM160
PICK1	2	TRIB1;DENND2D
ALDH1A2	2	EPB41L2;TM4SF1
POSTN	2	LATS2;GJB6
PLK2	2	NEK6;PID1
PI16	2	ACSS3;ABCC3
MZF1	2	ATG2B;MKLN1
KCTD15	2	FOXRED1;GTPBP2
INO80E	2	SORBS3;FAM193B
KAZN	2	C7orf43;SMIM10
ATF3	2	CYBA;HIST1H2BG
MYO1E	2	ART3;FOXRED1
TRIM25	2	UNC119B;CBX6
BCKDK	2	CASP7;COX14
ZGLP1	2	CD52;CYP11A1
TSEN34	2	SCFD2;LPAR5
GATA2	2	C17orf59;PTCH2
RCOR3	2	STARD9;RFX3
DCN	2	CPQ;OGN
CCNG2	2	ARGLU1;LRRK2
PGRMC2	2	SRGN;EFNA5
SHOX2	2	COL3A1;FAT1
SH3D21	2	PIAS3;MEIS1
MAN1B1	2	FAM198B;FMOD
BOC	2	DRAM2;CCDC88C
KLC4	2	MFSD1;MAMDC2
C19orf44	2	CBR3;ABLIM3
LMO2	2	DLL1;UBE2T
TYW3	2	PGAP2;HIST1H2AC
RAP1GDS1	2	C16orf74;TMTC2
TMEM175	2	FBXO46;GLI4
PPP3CA	2	G6PD;MYSM1
BAZ1A	2	BEX5;MTMR3
METTL13	2	TAX1BP3;FAM219B
YIPF1	2	MOSPD3;L3HYPDH
MYEOV	2	CIB2;NDUFA4L2
AIMP1	2	KSR1;ABCC3
MRPS14	2	C8orf82;WBP5
FBXL19	2	TMEM160;MYZAP
GPRC5B	2	SPSB3;DPAGT1
SEPT4	2	ABCA2;IGSF21
HSPG2	2	RNF41;ZNF740
N4BP2L1	2	LPCAT4;CENPJ
DIAPH1	2	FOXRED1;UQCRQ
CHI3L2	2	APMAP;CD300E
SLC39A14	2	RGS16;SBNO2
CTDSPL2	2	UNC119B;ZNF579
RGS11	2	TMEM160;CEBPA
CHD9	2	B3GALT4;CUEDC1
LHX6	2	REPIN1;FADD
TNFSF13	2	HCK;CSF1R
LOXL1	2	LRP3;AMN
GPR64	2	SLC7A10;DSP
CNTN3	2	GRN;SH3BGRL
HLA-DMB	2	CD74;AHSA1
MAP3K11	2	PRPF40B;DENND4B
TFPT	2	PCDH1;PAFAH1B3
ADORA1	2	CBX6;GPSM3
SDCBP2	2	BHLHE40;RASIP1
HSPA2	2	EFNA5;TPST1
MAPK3	2	FOXRED1;C1orf159
PRDM2	2	IGSF21;RNF146
C6orf62	2	APOD;LDOC1
DHRS1	2	SPIN3;CHTF18
RARS	2	LRIF1;TMCO6
DNAJC4	2	ELL;HEXIM2
SIGLEC1	2	SLC3A2;CBX4
CYLD	2	SMG9;ZRANB2
CHIT1	2	SHFM1;SPP1
GDPD5	2	OSGIN1;SLC25A30
AGPAT4	2	IRX3;HECW2
GPER1	2	BAIAP2;EPAS1
PDZD2	2	RBP4;MRAP
SH2D3C	2	INTS3;IL1RAP
NDRG4	2	IGF1R;NPY2R
CDK9	2	TWIST2;ZBTB14
TMEM184B	2	SLC20A2;FAM134B
KPNA1	2	EXTL3;CSK
MEF2D	2	HOXC8;PLA1A
PKN1	2	ZNF865;ANKRD9
TRAF3	2	C19orf80;SLC27A2
ATRN	2	DPYS;CADM3
TM7SF2	2	LPL;GYG2
FST	2	ST14;ZBTB20
NAV2	2	ZC3H12C;KDM5B
CASC3	2	NAA25;LHX6
CASD1	2	SKAP2;MTPN
ZNF385D	2	C17orf72;APOLD1
SNCAIP	2	QRICH2;CDK3
TRADD	2	MGAT2;PELI1
ERG	2	GATSL3;ZNF574
TRRAP	2	C1orf53;POLE4
ELAC2	2	TMEM160;ZNF865
MBD5	2	FCHSD1;ZC2HC1A
ADM	2	EDA2R;FRYL
COPZ2	2	TSNAXIP1;NHSL2
POLR3H	2	KIAA0100;APBA3
SLC7A6	2	PDIA4;ESAM
SNRNP40	2	COL5A2;NUDT8
PDE9A	2	KIF22;C2orf42
IFRD1	2	ZNF644;CCDC132
PRKD2	2	SDHAF1;CCDC85B
LDHB	2	CRYAB;SIDT2
SCG5	2	SMG9;IL2RG
P4HB	2	ZNF580;FAM173A
ALG6	2	TMEM237;PREX1
HCFC1R1	2	SCAMP2;ARHGEF1
HLA-DMA	2	CXCL12;C11orf24
NID1	2	MAN1B1;DKC1
C14orf28	2	MIDN;GNAO1
GPAA1	2	KLC4;MZF1
POMC	1	PRL
MTCH2	1	C1QTNF4
CCHCR1	1	PSORS1C1
TEF	1	LONRF3
PSMA4	1	CTC-429P9.4
KCTD3	1	TSPYL4
SRPX	1	CCDC85B
SLC38A2	1	CCDC115
BCL3	1	PDP1
SATB1	1	COG7
TRIM41	1	CDK3
PER3	1	NR1D1
EFCAB4A	1	PTPRS
GFAP	1	SYNPO
NCLN	1	VEGFA
PPP3CB	1	ODC1
ARID4B	1	TANC1
ABCC5	1	UNC5CL
ACVR1C	1	ARFGAP1
JTB	1	TBX19
EMG1	1	FMNL1
SLC25A39	1	TMEM160
MVD	1	KDM3A
HRAS	1	TTC39A
PEX1	1	FOXRED1
CACNA1C	1	TMEM160
COL6A3	1	IGDCC4
ZNF608	1	IGFBP5
MAGI2	1	WDR81
SH3BP4	1	KDM6B
SPINT2	1	CLDN12
ADAP1	1	CXCL9
HSPBAP1	1	ASPRV1
HN1L	1	SLC27A2
PLXNA3	1	MKLN1
GCFC2	1	PNPLA6
FANCG	1	HS1BP3
LRRC15	1	PTN
HAUS7	1	DEAF1
CSF3	1	CBX7
BTK	1	FAM47E-STBD1
TRNAU1AP	1	VASH1
SCFD1	1	ZNF189
FYCO1	1	CEBPG
PGS1	1	CNIH2
C5orf38	1	TMEM160
CREM	1	ZCWPW1
NAA30	1	MFHAS1
ZSCAN9	1	RIMS3
TM9SF4	1	C20orf112
ITGA8	1	MAN2A1
AES	1	DEK
NIN	1	EPHX1
DLAT	1	ACACA
ARV1	1	GZF1
MTMR4	1	ARHGEF1
NHLRC3	1	TNFRSF14
SNX13	1	PGS1
MKLN1	1	DUSP7
WWC3	1	TRPC1
HSD11B1	1	SGK494
SSSCA1	1	CEBPA
SPOCK2	1	ADAP1
RNF41	1	ABI3BP
LSM6	1	DEK
NTN4	1	ZNF775
BEX4	1	DYRK3
RGS10	1	WAS
DHX16	1	PPDPF
CYP2R1	1	C2orf42
C20orf24	1	TMEM160
SDHB	1	TMEM160
CLTC	1	BBX
ARAP3	1	CD93
NLE1	1	NOP2
SDC2	1	C3orf35
UCHL1	1	PHLDA1
ZMYM1	1	PACSIN3
KIF21A	1	CD22
CTDP1	1	BBS7
NEDD4L	1	SURF4
UBE2D1	1	PXN
TMTC1	1	RAB38
TFEC	1	LTBP2
CDKN2AIP	1	LRRC39
LCAT	1	YPEL2
USF2	1	ZBTB17
TMEM5	1	FGD6
TYMS	1	CCNB2
CTHRC1	1	FZD6
TRIT1	1	ASPRV1
DGKD	1	KLHL26
GNPAT	1	GZF1
PSMD11	1	ZNF189
CST7	1	TRAPPC5
FAM20A	1	FUBP1
DXO	1	TAS2R20
CCDC102B	1	CORO2B
TMEM141	1	TLCD2
CKAP5	1	KRTDAP
EMCN	1	SMAD6
SLCO2A1	1	DSC2
CD163L1	1	ARHGAP29
SMAD4	1	MASP2
TJP2	1	TLN2
PUF60	1	ATXN7
POLB	1	ASIC3
AGL	1	PDE1C
UBFD1	1	MTSS1L
CA11	1	C15orf39
HLA-DQB1	1	ZNF865
ALG2	1	ZNF775
NDFIP2	1	FCHO2
CD79B	1	DARC
SEPT11	1	TMEM198
CHI3L1	1	CDKN1B
KIAA0196	1	CECR5
ATG16L1	1	CROT
ULK3	1	FAM219B
SLC39A3	1	CCDC85B
CNTNAP1	1	LIPF
EFCC1	1	PRR24
CYTIP	1	LGR6
RABGGTA	1	DHRS12
ELTD1	1	FOXRED1
ADAMTSL4	1	ZNF644
JMJD1C	1	CPQ
LPAR1	1	SAC3D1
C21orf59	1	CALM1
NUDT16L1	1	TMEM160
MRVI1	1	SPINT1
ATP6V0A1	1	UBL4A
MPP3	1	ZIC4
GALK1	1	CCP110
ATG5	1	PPM1D
KCNIP3	1	HSD17B8
WSCD1	1	PPP1R16B
PPFIA3	1	SMG6
PAM16	1	CHTF18
GSKIP	1	CREBBP
PRKAR1A	1	C5orf51
ZC3H14	1	ZRANB2
AP1AR	1	SOX17
GAREM	1	SH2B2
UCHL5	1	PAPPA
PTCH1	1	HECTD2
WIBG	1	BID
MAPK13	1	FHL3
NCKAP1L	1	SFMBT2
PRPF31	1	MRO
KDM5B	1	DYRK2
CREBBP	1	MYOT
SULF1	1	ISLR
EFNA1	1	RASIP1
RNMT	1	MYSM1
CTDSPL	1	PGAP3
MCMBP	1	DENND4B
SMPDL3A	1	GDF15
PPP1R1B	1	LGALS12
GPC3	1	MAN1B1
CD163	1	PIK3AP1
ZMYND15	1	BTK
C16orf89	1	ATP2B4
ZNF337	1	ROMO1
LST1	1	SPARC
PHF14	1	CAB39L
ITIH4	1	ASAP2
PHF23	1	BYSL
MAP2K6	1	ZCCHC14
MNT	1	ECHDC2
SLCO2B1	1	MAFB
KLHL29	1	QRICH2
PPP3CC	1	SLC39A11
SYNE1	1	AMOTL1
FRS2	1	CFI
TARBP2	1	DNMBP
TMEM8B	1	SREK1
FAM98A	1	GIGYF1
CLN5	1	ZBTB47
TMCC3	1	RASSF9
UNC45A	1	SNAPC4
ECH1	1	CCS
FUK	1	FHL3
EXOC6	1	PCK2
PREB	1	MAP1B
PTGDS	1	GPER1
DCAF5	1	ZNF428
BRPF1	1	YARS
FAM129B	1	CEBPA
MDC1	1	ITPR3
MTERFD2	1	LRP11
PTPRF	1	MAPK8IP3
PJA1	1	LRRC17
CEPT1	1	RHOBTB1
RUNX1	1	LAMA4
SLTM	1	TSPYL2
SELE	1	LMBR1L
PDK2	1	SUFU
SLBP	1	GYPC
BBC3	1	TMEM160
RGAG4	1	PSAP
MTM1	1	LZTS2
YWHAH	1	DUSP23
NEK1	1	MASTL
TAX1BP1	1	KRT13
FKBP10	1	BTAF1
SRCAP	1	ZNF512B
SLITRK4	1	BDKRB1
NLRX1	1	AGA
EBF1	1	GPC1
SERPINA5	1	SLC29A2
HK3	1	CACHD1
CEP290	1	FUCA1
ZNF775	1	OSGIN2
PEA15	1	TMEM123
MAPKAPK5	1	WASF1
ARHGAP33	1	RNF38
CHD3	1	BRD8
SEC11C	1	ACY1
DCUN1D5	1	LRRCC1
PNMT	1	CHAC1
COL4A6	1	PLA2G4A
EGLN2	1	SLC26A6
NRF1	1	ATPIF1
PLSCR4	1	AHSA1
TF	1	FEM1B
ST6GALNAC3	1	CASKIN2
KIFC3	1	TRAPPC5
SH3PXD2A	1	ZFP62
SLC25A46	1	DMTF1
CUEDC1	1	ZNF444
NUP214	1	MFHAS1
SEC61A2	1	C1QTNF4
ZNF76	1	POLR2E
ZDHHC9	1	CEP290
ALOX5	1	PFKP
LTBP1	1	NR2F2
TMX3	1	TBX18
SUPT6H	1	TRAF3
ALMS1	1	C1QB
MFSD1	1	RPL28
TEFM	1	TLN2
IDE	1	COL6A6
MMS19	1	PHF21A
CDKN2B	1	PDE5A
DHX32	1	PKN3
TBKBP1	1	SLC43A1
PSME4	1	ROMO1
ODF3B	1	PCK2
TANC2	1	DFNB31
PIGT	1	TMEM47
ANXA4	1	OMD
ZFP62	1	HOXB6
NCS1	1	MAP1LC3A
SLC9A3R2	1	RHPN1
ITGA7	1	CHD3
IFI44L	1	EPAS1
FBXO4	1	CEP290
HDGFRP3	1	C14orf28
HCCS	1	EPHA2
TBC1D25	1	PSMB10
TRIM27	1	STPG1
TRAPPC6A	1	SGIP1
PPIL2	1	NCKAP5L
CRAMP1L	1	PDP1
ELMSAN1	1	SPG20
MPG	1	HOXB2
NAT10	1	NANS
ENOPH1	1	KCNQ3
CSK	1	FAM13C
DHX8	1	GLIPR2
SRF	1	CHTF18
PTPRG	1	ARMCX1
WARS2	1	DDX31
HERC3	1	COX14
COG5	1	ECE2
PLA2G2A	1	KIAA0232
SIL1	1	SPR
RRP1B	1	RPS21
SMPD1	1	MEF2A
LRRK1	1	CCDC71L
INSIG1	1	KCNAB1
GNLY	1	IL1RL1
B4GALT7	1	GDF10
DCP2	1	LRCH2
RAB6B	1	CCR1
TRPV2	1	SPARCL1
KIF22	1	S100A6
SMAD6	1	MYZAP
PUM1	1	PBX3
PIGZ	1	CLIP3
PROSER2	1	CEBPA
UBALD2	1	TRIM9
C14orf93	1	LMO2
CLEC12A	1	C17orf96
UBE2I	1	KIF7
KLHDC9	1	WDR43
CPSF3L	1	LGALS1
WDR13	1	PDE2A
SIRT7	1	PDP1
USP35	1	ZNF703
APBB1	1	SNRNP70
EBF4	1	SGK494
ATF1	1	TMEM14A
LMO3	1	CNST
CHD6	1	LRIG3
DAB2	1	NCF4
TEKT3	1	VASN
FMN1	1	GPR183
QDPR	1	FBF1
IRX2	1	FARS2
DGCR8	1	VARS
TIAM2	1	ATP13A2
PLAA	1	CSRNP3
LYST	1	RASSF9
KIAA1522	1	KIT
USP15	1	FUBP1
GDE1	1	PANK1
ANKRD17	1	KDM5B
HAGHL	1	TMEM237
TM4SF18	1	PTPRK
BCL9L	1	RPL28
JUND	1	SDHAF1
FAAH	1	UBASH3B
TMTC2	1	C1orf21
CMC1	1	FPGS
MIPEP	1	ENOSF1
ANKRD13B	1	KLHL9
CIZ1	1	DZIP1L
TMEM25	1	EHD4
EGLN3	1	SLC7A8
SSFA2	1	CLIP4
TNIP1	1	FGGY
LAMB3	1	ST5
TTC12	1	TMEM9
ITPA	1	HSPA13
DOK2	1	TDRKH
SLC15A4	1	SH3RF3
C1orf198	1	PTRH2
FBXO42	1	ZNF691
SUPT3H	1	SLC29A2
EXOC3L1	1	FCN3
RBM24	1	FAM166A
ZNF512B	1	ZNF865
ATP6V1C1	1	TOP1MT
FAM173A	1	INPP4B
POLR3E	1	TMEM160
GOLGB1	1	HMGB2
TC2N	1	ADAT2
STRIP1	1	PDF
NLRP1	1	ZNF436
ZMAT1	1	FBXL3
IMP3	1	RMI2
TRAPPC13	1	CCL2
MUM1	1	NFIX
NAALAD2	1	UBE2T
CEP63	1	ARGLU1
RBM33	1	MYO9A
ZFAND3	1	MAN1B1
FIP1L1	1	REC8
NELFCD	1	RAC3
CISD3	1	ZMYND8
SCNN1A	1	ISG20
ZGPAT	1	DIP2C
FCER2	1	SLCO2B1
SLC7A10	1	QDPR
RNF19A	1	PPP1R35
F10	1	RILP
MON1A	1	ITIH4
TMEM55A	1	MYSM1
HEG1	1	RNF38
PLXNB3	1	CXCL9
PHF1	1	CCDC85B
RUSC1	1	S100A4
TMEM63B	1	ANK2
NPR3	1	CEBPB
PLCB4	1	F13A1
ALG8	1	ALDOA
B4GALT2	1	TRAPPC5
ALOX15B	1	LRRC8D
HSD17B6	1	HSPA12B
BIRC2	1	FOXN2
RCN2	1	PRKCZ
GPT	1	ADAM33
KLF13	1	KRT10
PRIMA1	1	PCDH20
G6PD	1	EPHA2
FRMD1	1	ALDH1L2
C8orf82	1	ZNF862
RIN2	1	ANKRD35
PAOX	1	KCTD14
TSTA3	1	SETDB2
ENO2	1	HDGFRP3
RDH14	1	TRAPPC5
GUCY1A3	1	NID1
SDHAF2	1	FAM166B
CAST	1	ALOX5AP
PRPF38B	1	HES6
MFSD6	1	SGSH
MAN2B1	1	PMVK
MORC2	1	ATP11C
INF2	1	ARL13B
TMEM62	1	HOXB2
SCARA5	1	HSPA2
HELQ	1	TIMP1
NUDT14	1	MGAT2
SERGEF	1	TM6SF1
C9orf156	1	PGM2
PIK3R1	1	FOXN2
CACNA1H	1	MYCBP2
ATP6V0B	1	KIAA0100
ARHGEF28	1	SMTN
ACSL5	1	C4orf48
TMEM9B	1	GADD45B
PLXNA2	1	RPS6KA2
TMEM187	1	LGI1
XPO1	1	ANKRD37
THUMPD2	1	SUN2
SC5D	1	GHRL
CPNE8	1	FANCM
MED12	1	KIAA1239
GOLM1	1	ITPR3
CKLF	1	ROMO1
PHYHIP	1	HEY2
AMIGO2	1	PRPF40B
PDIA5	1	NAP1L5
STXBP6	1	KLF2
VPS13A	1	SPRY1
C16orf58	1	ZDHHC1
NR3C2	1	KIAA0232
STPG1	1	FAM83G
CHL1	1	MTR
ZNF318	1	PLCD4
C5orf30	1	ABCB6
ZNRD1	1	UQCC2
ICA1	1	TMEM14A
AP2M1	1	AHSA1
TMEM237	1	CYBRD1
JHDM1D	1	HSPA13
GSK3B	1	FARS2
NPR2	1	ZBED3
CNRIP1	1	ZNF792
PLEKHA1	1	FAM76B
PRRC2B	1	CREBBP
NNAT	1	P2RX1
PLEKHG4	1	PVRL1
ERF	1	FBXO46
ATP1A1	1	EVA1B
METRN	1	NFATC1
RPS6KB2	1	SLC6A16
ETV5	1	CCDC167
CCRL2	1	MMP7
COPS7A	1	GABPB1
C9orf142	1	SELRC1
MBNL1	1	RPS6KA2
NIPBL	1	FOXRED1
RTN1	1	POLR2E
IL1R1	1	KLHDC1
GLI3	1	CDC42EP3
PIGO	1	IFNGR2
CYSTM1	1	HSD17B10
RASAL3	1	LEPREL1
ACSS3	1	CDK17
FAM214B	1	MAML2
KATNB1	1	PFKP
FBL	1	FKBP2
ITGB2	1	MMP7
ATAD2B	1	LBH
VAMP4	1	CYP2E1
TNFAIP6	1	APOLD1
SLC4A7	1	PDLIM7
ERI2	1	TRAPPC6A
CADPS2	1	MLLT4
LIN7A	1	LFNG
TCEAL8	1	PEG3
FRMD6	1	IQCK
TTLL5	1	TRAM2
DARS	1	KHSRP
TGM5	1	KLHL17
THAP4	1	CD34
SHMT2	1	GARS
RABGAP1L	1	SMIM10
SLC39A6	1	CEP350
FAM76B	1	CCRL2
WASF1	1	ADARB1
RPS6KA1	1	MBOAT2
HLTF	1	GPSM1
FBLN7	1	PCSK1N
AURKAIP1	1	TLL1
TTC18	1	ERMAP
GLIPR1	1	RP11-451M19.3
KAZALD1	1	ZMIZ1
QSOX1	1	S100A12
MEIS1	1	KCNIP1
NTRK3	1	LRRC17
P2RX6	1	SEMA6D
ZNF641	1	ADIRF
AP1M1	1	ANKRD1
RIPK2	1	GDAP1
GULP1	1	COMMD8
SMARCA4	1	KRT10
DHRS12	1	PIK3IP1
TMEM248	1	NLE1
RTKN	1	RFTN1
HEATR2	1	KRT10
ZZEF1	1	OSGIN2
CCR10	1	OGG1
FBXO7	1	FMNL1
ACD	1	STX10
FBXO22	1	PCK2
SIRT3	1	NCKIPSD
AP2S1	1	B4GALT1
RNF111	1	MFAP3
AMDHD2	1	DDIT3
VPS51	1	ZNF865
TP53INP2	1	CLDN5
RGS19	1	CNIH2
IL15RA	1	P2RX6
PVRL3	1	PEPD
PPP1R21	1	CCNG2
LMBRD1	1	ABLIM1
RADIL	1	SPRED3
C1orf95	1	SHOX2
RNH1	1	CCDC88C
PCDH18	1	ZBTB17
JMJD7	1	ACOT7
CRTC2	1	TEX261
LGALS3BP	1	ZNF671
USP1	1	TIAM1
P4HTM	1	ECHDC2
ZCWPW1	1	NOD1
TBC1D10B	1	FUCA1
EML4	1	TMEM165
HOXC9	1	CCDC85B
VAMP8	1	CYBB
WNK2	1	DES
STUB1	1	NTN4
HPS4	1	RARG
VWA9	1	PCED1A
GET4	1	HSPA2
HCFC2	1	WFS1
UBE2E1	1	ZRANB2
LPAR2	1	FAM3B
ATP11C	1	ELF4
ZNF644	1	GLUL
WRAP73	1	COL27A1
PARP10	1	AHSA1
TOPORS	1	NEK7
SLC43A1	1	CCDC85B
TIMMDC1	1	TCF7L2
FASTK	1	HSPA13

## Sheet: Adipose − Subcutaneous (IR-IR)
IGFBP3	136	SAC3D1;ACADVL;POLR3E;BOC;GSN;LHX6;EML3;NDST2;APBB2;FAM173A;HOXD8;C20orf24;TSC22D2;SETD9;SNAPC2;PPP1R35;REV3L;IQCJ-SCHIP1;SLC15A3;USP35;PKN1;ZNF174;APP;D2HGDH;SRPX;HMCN2;HOXC9;CAPZB;SLBP;RILP;ALG2;NUDT16L1;RBPMS2;GRASP;IFNGR1;SEPT5;EDNRB;CHIC2;TMEM175;GLDN;NT5C;DGAT2;PNPLA2;PCBP4;ZNF768;FAM129B;FBXL19;C3orf58;METRN;HOXB2;ZNF580;IGFBP7;INSIG1;TRIM47;SLC39A3;SUV420H2;MPG;LRIG3;TP53I11;C18orf32;RBPMS…
MXRA8	113	ACADVL;EVA1B;FBLN7;GSN;CREBZF;PPP1R7;EML3;FAM173A;IRF2BP2;IRX3;ZMYND8;P4HB;WNK1;PPP1R35;CSF3R;IQCJ-SCHIP1;PDE8A;FGFR1;PKN1;APP;SRPX;TACC1;ZNF775;HOXC9;EMD;SYNM;RILP;ALG2;NTN4;QSOX1;LTBP4;PPP1R1B;DGAT2;RTN4;PCBP4;RBM33;FBXL19;OS9;HOXB2;IGFBP3;TRIM47;SLC39A3;SUV420H2;CGGBP1;MPG;LRIG3;TP53I13;MRPS25;PDZD2;WDR33;ALKBH7;CNRIP1;HES6;EPG5;KLHL29;EFCC1;GRASP;RNASET2;RPRD2;SIK3;AURKAIP1;MRPS34;MARK2;TRAPP…
IQGAP1	110	FRYL;RAPGEF5;HIPK1;TNRC6B;CLSTN1;CACNA1H;APBB2;ZC3H13;MYCBP2;NUP214;IRX3;LIPE;DIAPH1;DYSF;JMJD1C;SH3GLB1;KIAA1551;MYO1B;MTUS1;SMARCD2;ATP2B4;ARID1A;AKAP9;CEP290;STARD9;TCF12;NUP205;LPHN2;MED23;HSPG2;GAB1;YTHDF3;PUM1;IFNGR1;CLTC;CTIF;CLASP1;LRRK2;PEPD;NID1;CDC42BPA;ARID2;PJA1;DDX60L;CCDC50;TMEM123;METRN;DHRS11;ACSF2;MARC1;EPAS1;TP53BP2;RBPMS;ITGAV;FLNB;MDN1;HDAC3;MYH14;ANKRD13A;EPHA4;ZNF232;ZFHX3;…
DUT	103	HECTD3;ACADVL;SAC3D1;EVA1B;BOC;GSN;LHX6;EML3;APBB2;GSE1;RELB;IMP3;HOXD8;C20orf24;P4HB;ATG16L2;SETD9;C7orf43;PPP1R35;REV3L;SLC15A3;WRAP73;APP;D2HGDH;CAPZB;RILP;RBPMS2;IFNGR1;SEPT5;SMARCB1;ENOPH1;PPM1G;GLDN;TCP11L1;PPM1M;PNPLA2;ZNF511;C3orf58;METRN;HOXB2;TP53I3;ZNF580;TRIM47;PHLDB2;SLC39A3;ABCG1;IGFBP3;C18orf32;RBPMS;MYZAP;FAM150B;AGTR1;PAOX;FBXO7;GRASP;RNASET2;GAS2L1;MRPS34;SIPA1;TPRA1;ATOH8;LYSMD…
PPM1G	84	HECTD3;ACADVL;SAC3D1;MAPKAPK5;CRLF1;CDKN1C;HYI;EVA1B;RBPMS2;JUND;MSH6;WRNIP1;C17orf70;EFCC1;NUDT16L1;GRASP;MESP1;BBC3;FBXL19;SLC25A39;SEMA4B;RELB;PAN3;STRIP1;PPP1R1B;LONRF1;RASIP1;CFD;EML3;ADAR;NTN4;CDK16;NTRK2;PDE8A;ALG2;EMD;KLF2;PIK3R1;DHRS11;AGAP2;CST3;SMAD6;B4GALT2;EFR3A;SHISA4;HTATIP2;ATOH8;C3orf58;ST6GALNAC6;LTBP4;TMUB1;CUL4A;C20orf24;LOXL1;RTN4;KLF16;C7orf43;PPP1R35;REV3L;MMP28;TRMT44;C12o…
LMNA	83	NUDT16L1;SLBP;APP;ZNF213;GPAA1;CDKN1C;HYI;EVA1B;QSOX1;MRPS34;PITPNC1;D2HGDH;PRKD2;FBXO7;SEPT5;LRIG3;DGAT2;BOC;RNASET2;GSN;IFNGR1;RAB34;XBP1;IDH3G;GLDN;EML3;NT5C;RTN4;PCBP4;FAM173A;GPRC5B;PNPLA2;LHX6;ZNF768;MED16;PPP1R9B;SLC35C2;ATOH8;OS9;PRKCH;HDLBP;TMUB1;ST3GAL4;HOXB2;P4HB;ENOPH1;SDF4;YKT6;PFKFB3;SNAPC2;PPP1R35;TMEM175;FPGS;MFSD7;TRIM47;C8orf82;SLC39A3;DUT;USP35;SUV420H2;BSCL2;PEX1;MPG;PKN1;C5or…
ACADVL	78	PTH1R;CRLF1;HYI;EVA1B;FBXO7;RBPMS2;WRNIP1;MAP2K3;RNPEP;LTBP4;KIAA1522;EFCC1;NUDT16L1;GRASP;SEMA4B;SLC25A39;BBC3;GSN;PPM1G;STRIP1;PPP1R1B;KLF16;ELAC2;GLDN;ZNF800;TRIM47;NAT8L;ANKRD9;NTRK2;FAM173A;IRF2BP2;PNPLA2;ACAA1;BACE1;MARK2;NFE2L2;FBXL19;CST3;SMAD6;DYRK1B;TPRA1;MXRA8;ATOH8;LYSMD2;SLCO3A1;TMUB1;UBE2G1;LONRF1;METRN;WBSCR17;SIPA1;IGFBP3;SERP1;GUK1;MMP28;ST3GAL5;ST6GALNAC6;PROSER2;DUT;WDR47;SLC27…
GBE1	77	CD2BP2;C6orf211;SYTL2;DOCK2;CLK1;MYO1B;SERGEF;PCOLCE2;PWWP2A;PRPF8;CCNG2;CABLES1;BCL9L;TEAD1;BIN1;ACADM;JRKL;GNAI1;CACNA1H;USP25;SNX13;VPS13C;B3GNT2;TMEM55A;PLOD2;TXNDC5;RB1;NEK9;CYP26B1;DARS;FAM114A2;IL1R1;MTM1;TF;FNDC3A;TOPORS;VTA1;LDHB;DCN;ZBTB1;HOXD8;DIAPH1;MTUS1;ARL6IP6;LSM6;MDC1;TANC1;ELTD1;EDEM3;SMARCA2;C16orf45;ZNF330;FPGT;USP16;ARFGEF1;SATB1;INSIG1;PCNX;CPSF3L;HNRNPLL;OSBPL1A;SLC35F5;LAC…
ATP2B4	76	FMNL2;MYH11;ZFHX3;SYNM;OLFML3;ATP2A2;CRAMP1L;HSPG2;PIGT;SERGEF;FYCO1;SORBS1;HIPK1;PDLIM7;PLEC;MTOR;CLTC;GRASP;BCORL1;IDE;IQGAP1;GSN;RPTOR;MRC2;DLG5;KMT2E;HCFC1;DGAT1;DGAT2;CDC34;ZC3H13;NEK9;GATM;NIPBL;MYCBP2;RBM33;FGF13;MBNL1;NBAS;VPS13B;PRKCH;KIAA0430;DYSF;ARID2;TSC22D3;VCL;TRRAP;CDC42BPA;SMTN;DMXL1;RER1;ARFGEF1;TNC;DTNA;MOB2;ABI3BP;PHLDB2;UBE2I;MEPCE;PINK1;LRRK2;SYNGR1;EDIL3;FAM20C;YLPM1;SPEN;K…
EPAS1	75	AOX1;RASIP1;KTN1;ST6GAL1;ITGA1;EPHA4;KIAA1462;MBOAT2;ERG;GPR56;TRIB2;TXNIP;EDNRA;EDNRB;CASD1;IQGAP1;PARM1;R3HDM1;LPHN2;CPNE8;PPM1A;PPFIA1;DGAT1;MMRN1;ADAMTS9;SULF2;MKL2;IFI16;ETS1;PIK3R3;IL1R1;MBNL1;MBNL2;B4GALT2;DNMBP;MPDZ;ATOH8;PRKCH;LIPE;TMEM123;COL18A1;FLI1;SOCS2;VCL;NUDT5;KIAA1551;SH3GLB1;POSTN;ABLIM1;RPRD2;MFSD6;PTTG1IP;PLSCR4;SCN4B;ZDHHC5;CFI;F8;CADPS2;LRRC32;ACSL1;NTN4;KIAA1217;ITGAE;MTUS…
CDC42BPA	72	EGFLAM;FRYL;ANKRD13A;ARIH1;RPGR;PSMF1;TCHP;DOCK7;PCOLCE2;RAPGEF5;HIPK1;NAV1;CTIF;BCORL1;ADARB1;TXNDC5;IQGAP1;GSN;DCN;CAPN7;DYSF;WDR46;PREX1;DGAT1;DGAT2;PEPD;APBB2;MARC1;CYP26B1;PNPLA2;SPARC;PAN3;PIK3R3;MYCBP2;PIK3R1;ITGA1;PJA1;COQ9;LYST;MED12;LDHB;VPS13B;CACNA1H;KIAA0430;LIPE;RBM33;CLASP1;XPO1;ACSF2;WNK1;KIAA1551;NUDT7;REV3L;TMEM165;ARFGEF1;CYTH1;PHLDB2;ATP2B4;DIAPH1;EGLN2;HDAC9;MBTPS1;REEP5;C7or…
CST3	71	C17orf70;PPP1R9B;UBE2J2;RILP;CDKN1C;STRIP1;EVA1B;RBPMS2;PDGFB;WRNIP1;NFKBIZ;GRASP;RNPEP;ACADVL;CPSF6;SEPT5;MESP1;BBC3;FBXL19;SLC25A39;ZNF839;XBP1;PPM1G;SHISA4;PPP1R1B;LONRF1;POC1B;DOK3;MRPS34;CDK16;PNPLA2;ACAA1;TRAPPC12;KLF2;SIPA1;ELMSAN1;ZNF414;ATOH8;UBE2I;ST6GALNAC6;LTBP4;TMUB1;C20orf24;LOXL1;GSN;FOSL2;SSSCA1;C7orf43;REV3L;GUK1;TRIM47;SCAF8;TMEM5;SUV420H2;MIDN;BACE1;MEPCE;RAB11FIP5;ZNF174;TFG;D…
ATOH8	70	HOXC9;ACADVL;RASIP1;CRLF1;CDKN1C;HYI;EVA1B;IQCJ-SCHIP1;WRNIP1;GRASP;HIPK1;EFCC1;PINK1;MESP1;BBC3;RNASET2;LHFPL2;PPM1G;STRIP1;SDF4;KLF16;LHX6;PNPLA2;ZNF800;MRPS34;CDK16;ZNF414;NTRK2;ATP2B4;NAT8L;ALG2;UBE2G1;SIPA1;FBXL19;CST3;HOXD8;EPAS1;EFR3A;C3orf58;SDK1;LTBP4;TMUB1;LONRF1;LOXL1;TSC22D2;FOSL2;TP53I3;PPP1R37;IGFBP3;SERP1;PPP1R1B;MMP28;TRMT44;ST3GAL5;ST6GALNAC6;LMNA;DUT;KIFC3;MIDN;BACE1;MEPCE;RNF16…
MRPS34	69	CAPZB;SLBP;CUEDC1;RILP;CDKN1C;EVA1B;RBPMS2;ZFHX3;RNPEP;SYNM;TRIM47;MESP1;BOC;RNASET2;RAB34;XBP1;PVR;ELAC2;DUT;NT5C;DGAT2;APBB2;PNPLA2;PCBP4;PREB;RBM33;SIPA1;FBXL19;CST3;PPP1R9B;HSD17B4;TPRA1;ZNF467;ATOH8;ST6GALNAC6;ENOPH1;RTN4;METRN;HOXB2;ACSS2;FAM129B;TP53I3;SNAPC2;SLC52A2;SMARCD3;PTPRS;MXRA8;LMNA;SLC39A3;NAT8L;SLC27A3;GNAI1;MPG;ZNF414;PKN1;IGFBP3;ZNF174;EFR3A;MOGS;HEXB;C18orf32;CMPK2;REV3L;GPAA…
ABLIM1	68	CD53;HDAC3;PKIG;IPO11;KTN1;SPON2;ADORA1;SPTAN1;CELF2;ARHGEF3;RAPGEF5;HIPK1;CTIF;S100A13;CMIP;BIN1;LHFPL2;CAV1;DCN;LOXL1;SLC39A10;SMG6;ARHGEF11;PREX1;TPD52;TXNDC5;BAIAP2L1;CCDC88C;TLN2;PEPD;RASSF1;DDAH1;PIK3R3;MAGI1;NUP214;S100A16;HNMT;SPIN3;DPP7;CCDC51;PLS3;CCDC39;DYSF;TBX3;TCEA2;SH3GLB1;MFSD6;AGAP1;SMARCD3;DYNC1LI2;EPAS1;SFRP1;MYO18A;PARP16;MPZ;AGBL5;ACSL1;RIN2;MAP3K11;NTM;ZNF423;GPR133;C5orf58;…
PNPLA2	65	ACADVL;MYH14;ACVR1C;RPLP2;EVA1B;DNM2;JUND;PCOLCE2;PCK1;SCRN2;CTIF;TMUB1;IGFBP3;PMM1;CLSTN1;TMEM132C;GYG2;IRF2BP2;PPP1R1B;DGAT1;NAT8L;DGAT2;TLN2;ANKRD9;TMEM5;GSE1;PC;CDC42BPA;JMJD1C;TF;CST3;PLIN1;EFR3A;ATOH8;APMAP;LIPE;DIAPH1;CLASP1;EGLN2;ST6GALNAC6;ACSF2;SH3GLB1;PJA1;SERP1;PLCD1;PATZ1;LMNA;DUT;MARC1;MIDN;SLC7A10;BACE2;MRPS34;PLEKHG6;CFI;GSN;ALDH1L1;GPT2;GLYCTK;CALU;SHISA4;PALLD;TMEM214;CRLS1;CFD
EML3	64	SAC3D1;ACADVL;RASIP1;RILP;MFSD7;HYI;RBPMS2;JUND;WRNIP1;SLBP;FBXO7;GRASP;MESP1;BBC3;PPM1G;LOXL1;SDF4;C12orf75;ELAC2;ZNF800;ZNF580;DGAT2;CDK16;HOXB2;TRAPPC12;KLF2;SIPA1;PPP1R9B;MXRA8;ST6GALNAC6;LTBP4;TMUB1;LONRF1;RTN4;CTSA;FOSL2;YKT6;IGFBP3;PPP1R1B;SLC27A3;MMP28;ST3GAL5;TRIM47;LMNA;SLC39A3;DUT;KIFC3;LONP1;KLF16;MIDN;BACE1;C5orf38;RAB11FIP5;C7orf43;ZNF174;COLCA2;HEXB;PALLD;PITPNM1;CMTM3;AGTR1;RCE1;C…
TRIM47	63	EMD;SLBP;RASIP1;CDKN1C;EVA1B;ROGDI;MRPS34;WRNIP1;NFKBIZ;RNPEP;ACADVL;GRASP;BBC3;FAM20C;LMNA;HEXB;PPM1G;STRIP1;SDF4;C12orf75;GLDN;CACNB3;EML3;NDST2;HSBP1L1;NID1;UBE2G1;DDR1;CST3;PPP1R9B;LYSMD2;LTBP4;TMUB1;ST3GAL5;IRF2BP2;HOXB2;RBPMS2;ENOPH1;MFSD7;C7orf43;PPP1R35;PPP1R1B;GUK1;YKT6;KAT6B;MXRA8;PROSER2;DUT;USP35;SLC41A1;LRIG3;C5orf38;RAB11FIP5;IGFBP3;ZNF174;TFG;D2HGDH;PALLD;MIDN;FAM150B;CDK9;AGTR1;MM…
SLC27A3	62	PTH1R;EMD;ACADVL;ZNF467;RILP;CDKN1C;RNPEP;EFCC1;FBXO7;PRKCDBP;BBC3;SRPX;RNASET2;XBP1;SDF4;SCARA5;EML3;GRK5;CDK16;ANKRD9;PDE8A;IRF2BP2;ALG2;PCBP4;FBXL15;MARK2;APP;PPP1R9B;EFR3A;MXRA8;LONP1;TMUB1;BACE1;PKN1;P4HB;ENOPH1;GLTSCR1;ZNF580;SERP1;PPP1R1B;MMP28;ST6GALNAC6;SLC39A3;USP35;FGFR1;MIDN;MPG;CNRIP1;PTPRS;RAB11FIP5;PFKFB3;ZBTB7A;PREB;MTA2;TP53I13;MRPS34;SLC1A5;RCE1;DEDD2;TFG;ATF3;PHF1
TFG	62	RILP;NTN4;RBPMS2;EFCC1;C19orf24;TRIM47;ZBTB7A;BBC3;TMEM175;UBN1;PPM1G;STRIP1;RAB34;BOC;LHX6;MRPS34;NT5C;GRK5;ANKRD9;PCBP4;FBXL15;SNAPC2;HYI;ELMSAN1;ZNF579;MOGS;TPRA1;MXRA8;C3orf58;LONP1;TMUB1;PTPRS;ACSS2;P4HB;TANC1;C7orf43;SMARCD3;CST3;ST6GALNAC6;LMNA;SLC39A3;SLC27A3;FGFR1;MIDN;MPG;MEPCE;LRIG3;C5orf38;IGFBP3;CUX1;APP;HEXB;C18orf32;ELAC2;SRPX;SHISA4;C8orf82;MTA2;SLC1A5;AGTR1;SLC9A3R1;PRKD2
TMUB1	61	TNFSF13;SAC3D1;ACADVL;RASIP1;RILP;HYI;EVA1B;ODF3B;RBPMS2;RNPEP;EFCC1;C15orf59;FBXO7;BBC3;RNASET2;XBP1;PPM1G;STRIP1;LHX6;EML3;TRIM47;CRLF1;CDK16;ANKRD9;PNPLA2;FBXL15;TRAPPC12;FBXL19;CST3;SMAD6;PPP1R9B;EFR3A;SHISA4;ATOH8;C3orf58;LTBP4;SPOCK2;C20orf24;NUDT16L1;HOXB2;SIPA1;IGFBP3;GUK1;SPATA5L1;ST6GALNAC6;LMNA;KIFC3;SLC27A3;C5orf38;STK32B;POC1B;ZNF580;TFG;CFD;FAM20C;C18orf32;GTF3A;PRKD2;C7orf43;COLCA2…
CFD	60	OAF;ACADVL;TIMP1;CAPZB;ALDH3A2;SMAD6;TMEM5;RBPMS2;JUND;MAP2K3;RNPEP;DNM2;TMUB1;BBC3;SLC25A39;GSN;PPM1G;STRIP1;LHX6;GLDN;EML3;ADAR;CDK16;ANKRD9;KIFC3;PNPLA2;KLF2;FBXL19;CST3;B4GALT2;LTBP4;SRF;ST3GAL5;HMCN2;RTN1;DMTN;ZNF580;PPP1R35;GUK1;IGFBP7;TNFSF12;ST6GALNAC6;HTATIP2;MIDN;TMEM66;RAB11FIP5;NCK2;SLC3A2;ECH1;SQRDL;SH3GLB1;TMEM39A;SHISA4;PALLD;HOXA4;BOLA1;AGTR1;PRDM8;PPP4C;CREBBP
DGAT2	60	PTH1R;SYNM;MYH14;CDKN1C;RPGR;PCOLCE2;RAPGEF5;HIPK1;ARRB1;TXNDC5;GYG2;LOXL1;PPP1R1B;XBP1;DYSF;TTC32;DGAT1;EML3;SLC9A3R1;CDK16;APBB2;TESK1;PNPLA2;PCBP4;PIK3R3;CDC42BPA;MAGI1;JMJD1C;TF;GNAI1;VPS13B;PLCB2;LIPE;IL4R;CSK;LGALS12;HOXB2;IGFBP3;REV3L;CMTM3;PLIN1;MXRA8;LMNA;NAT8L;MARC1;ATP2B4;PLEKHG6;C7orf43;PRRT4;PFKFB3;FAM20C;PREB;PLOD2;GPAA1;MRPS34;SLC1A5;RCE1;PJA1;PTPRS;FOLR2
GRASP	60	NFATC1;ACADVL;RASIP1;PHF11;RAB34;ODF3B;CST3;WRNIP1;SPNS2;PRKD2;SLC15A3;TRIM47;IQGAP1;PPM1G;PPP1R1B;KLF16;LHX6;ZNF800;EML3;NAT8L;KIFC3;SDF4;CAST;CLPTM1;UBE2G1;FOSL2;RELB;ZNF414;ATOH8;SLC41A1;HMCES;LONRF1;RRAGB;CCR10;IGFBP3;MEPCE;SPEG;LMAN2;MXRA8;PROSER2;ITPR1;DUT;HNRNPLL;ATP2B4;MIDN;ABCG1;EXOC1;SLBP;C7orf43;ZNF174;INSIG1;TP53I11;C8orf82;PITPNM1;ZNF423;FAM150B;CDK9;AGTR1;ATF3;IFNGR1
DCN	58	CDH11;AOX1;FRYL;SATB1;ZNF330;DARS;MED23;LMAN2;DOCK7;PCOLCE2;CCNG2;IFNGR1;CYSTM1;SMARCA2;BIN1;PTGFRN;GSN;CACNA1H;DDX39A;FMNL2;CCDC88C;PEPD;TMEM55A;CDC42BPA;VTA1;GBE1;ARHGEF11;INTS1;GPR133;SMNDC1;ARL6IP6;ELTD1;PLA2G2A;GPC3;MTOR;SMARCD2;MACROD1;CLK1;ABI3BP;CXCL12;PEX1;TM6SF1;PMP22;PLEKHG5;S100A13;CD163;TRAP1;ITM2B;ITM2A;MGP;COL1A2;PRDM2;C1S;ABLIM1;LPAR1;MMP2;SDC2;FOLR2
RTN4	57	HECTD3;OXLD1;CDKN1C;TLN2;PRKAG2;RBPMS2;MRPS34;UROS;PEPD;C1orf213;NUDT16L1;PPM1G;STRIP1;ZFAT;EML3;PPM1M;FYN;ANKRD9;FAM173A;GMDS;HYI;PPP1R16A;ZNF414;EFR3A;IL17D;C3orf58;LTBP4;TRO;LOXL1;HOXB2;TSC22D2;ZNF580;AGAP2;PPP1R1B;SLC25A25;MXRA8;LMNA;WRNIP1;DUT;FLNB;BACE1;C5orf38;PPARG;APP;ARMCX4;GAB1;PREB;SLC2A4RG;PALLD;PNKD;NFE2L2;C1S;SLC1A5;AGTR1;SREBF1;TP53I13;ARHGEF40
[truncated: 2,675 more rows]

## Sheet: Adipose − Viscera (TE-TE)
STK40	82	PHF14;NFATC1;ASB13;EHD1;GLIS2;MAP3K6;C1orf213;RASSF5;G0S2;SLC25A18;MAP2K3;OLFM1;DOCK9;MBOAT7;ALDH2;EPS8;TSLP;PANX1;RASAL2;TNFRSF12A;FRY;UGP2;CNR1;NEDD9;RPGR;IL1RL2;BHLHE41;ZNF385A;FMNL1;ARHGEF2;KANK4;CAP2;SLC16A2;CLIP2;NINJ1;NFKB1;PWWP2B;MIS18BP1;MATN3;PYGL;YWHAG;RRAGC;MKL2;ANXA1;TRAF2;TRAF3;MRPS6;CD44;FAM83G;MAL2;TCEA3;HSPB8;MRAS;C7orf41;SOX13;PHGDH;TP53BP2;SPARCL1;DUSP14;BIN1;CYTH4;SRXN1;PPM1M;…
[truncated: 4,721 more rows]

[truncated: 59 more sheets: Adipose − Viscera (TE-IR), Adipose − Viscera (IR-TE), Adipose − Viscera (IR-IR), Artery − Aorta (TE-TE), Artery − Aorta (TE-IR), Artery − Aorta (IR-TE), Artery − Aorta (IR-IR), Artery − Tibial (TE-TE), Artery − Tibial (TE-IR), Artery − Tibial (IR-TE), Artery − Tibial (IR-IR), Breast (TE-TE), Breast (TE-IR), Breast (IR-TE), Breast (IR-IR), Esophagus − Mucosa (TE-TE), Esophagus − Mucosa (TE-IR), Esophagus − Mucosa (IR-TE), Esophagus − Mucosa (IR-IR), Esophagus − Muscularis (TE-TE) …]
