# Supplementary material for: Co-expression networks reveal the tissue-specific regulation of transcription and splicing
Source: Genome Res. 2017 Nov;27(11):1843–58. doi: 10.1101/gr.216721.116 (PMC5668942; doi:10.1101/gr.216721.116)
Supplement: Supplemental Material [file supp_gr.216721.116_Supplemental_Data_S3.xlsx]

## Sheet: readme
		this file contains the ranked hubs shared across tissues.
		1st column - rank
		2nd column - hub

## Sheet: TE-TE
rank	hub
1	TYROBP
2	CYYR1
3	PTPRC
4	SPI1
5	CD53
6	DCN
7	TSC22D3
8	GPSM3
9	ESAM
10	CDH5
11	CLEC14A
12	LAPTM5
13	TACC1
14	WAS
15	ZBTB16
16	SCARA5
17	VSIG4
18	TPM2
19	S1PR1
20	FOSL2
21	DOCK2
22	SH2D3C
23	LCP1
24	CSRNP1
25	ITGB2
26	JPH2
27	CD163
28	KLF9
29	HCK
30	KLF15
31	MYL9
32	IKZF1
33	HCLS1
34	TEK
35	ARHGAP30
36	COL1A2
37	CSF1R
38	NOP2
39	NID1
40	AIF1
41	FSTL1
42	MLLT1
43	RNASE6
44	GLUL
45	SELPLG
46	PARVG
47	CD3E
48	CNN1
49	PDLIM7
50	FOXO1
51	NFIX
52	IL10RA
53	PNISR
54	ASB2
55	NEXN
56	SHANK3
57	MRVI1
58	FLNA
59	TMEM259
60	EVA1B
61	C1QC
62	MYOCD
63	LMOD1
64	IRAK3
65	SRGN
66	SLC2A1
67	AOX1
68	JUNB
69	IFI30
70	CD37
71	NCF4
72	NR4A3
73	C1S
74	CCM2L
75	SLC19A2
76	CDKN1A
77	GIMAP6
78	TIMP2
79	PIK3R5
80	FOLR2
81	SPEG
82	C1QA
83	DARC
84	PTPRB
85	RAC2
86	SIK1
87	TSPAN7
88	SASH3
89	CENPT
90	MGEA5
91	SH3BGRL
92	CSRP1
93	ERG
94	MAN1A1
95	MIDN
96	FBN1
97	SPARCL1
98	ZFP36
99	SMAP2
100	TAGLN
101	TMEM160
102	MAOA
103	RASL12
104	HMGB2
105	MMP2
106	PPP1R14A
107	RASSF3
108	RBPMS2
109	VCL
110	C1orf162
111	C1R
112	RRP9
113	CCDC85B
114	CYP4B1
115	C3AR1
116	C1QB
117	SERPING1
118	ARHGDIB
119	LRP1
120	ARHGAP9
121	CASQ2
122	SLA
123	ZNF219
124	ELTD1
125	STXBP2
126	MRC2
127	PLCB2
128	MYH11
129	MSR1
130	NME3
131	NCF2
132	PHC2
133	CFD
134	DDX17
135	GPD1
136	ZAP70
137	NFIL3
138	ZNF395
139	TNFRSF12A
140	EZR
141	NCKAP1L
142	SPSB3
143	HYAL2
144	CBX7
145	TBXAS1
146	ACTG2
147	ARID5B
148	CD4
149	MYCT1
150	CCNL1
151	FHL5
152	SESN1
153	ODC1
154	SCAND1
155	PER1
156	NUSAP1
157	AQP9
158	MYC
159	ATF3
160	ITK
161	GFPT2
162	HSPA12B
163	VEGFA
164	PHF1
165	JUND
166	SVEP1
167	ELK3
168	VIT
169	SRSF11
170	IGFBP6
171	FBLN2
172	TPX2
173	NR4A2
174	ROBO4
175	GNG11
176	CSF3R
177	ALOX5
178	COL5A2
179	NCS1
180	CDCA5
181	MMP14
182	TIMP3
183	TOP2A
184	XPO1
185	ARAP3
186	CYBB
187	OLFML3
188	PARP9
189	CD48
190	MGST1
191	ZWINT
192	FOXM1
193	AMICA1
194	IL6
195	BHLHE40
196	CALD1
197	ACAP3
198	FMNL1
199	PTPN6
200	ITGAM
201	FLOT2
202	RNPEPL1
203	KIRREL
204	ZMAT1
205	PLEK
206	FAM214A
207	CDK1
208	RASGRP2
209	F13A1
210	CYTH4
211	COL6A3
212	ITPRIP
213	H2AFX
214	CD93
215	BTG2
216	DCLK1
217	DOK2
218	FAM107A
219	SF3A1
220	OAS2
221	TGFB1I1
222	CILP
223	STAT1
224	SLC9A3R2
225	PDGFRB
226	CALU
227	NDRG1
228	TRAPPC5
229	OMD
230	LDB1
231	ZRANB2
232	SIGLEC1
233	ALOX5AP
234	CTSK
235	RASIP1
236	CD86
237	SNTA1
238	LCK
239	GYS1
240	DAPK3
241	CACNA1H
242	GIMAP4
243	SBNO2
244	SLCO2B1
245	CIRBP
246	TNS1
247	PIK3R1
248	PPRC1
249	GLIS2
250	KHSRP
251	MYO1F
252	PODN
253	RAMP3
254	HK3
255	ADCY4
256	BCL3
257	ILK
258	LRRC8A
259	CD2
260	PALLD
261	CEBPD
262	SORT1
263	IFI16
264	RNF122
265	SORBS2
266	SMTN
267	ZNF358
268	SDPR
269	SLC25A25
270	RRAS
271	MBD3
272	KCNH2
273	FERMT3
274	COL5A1
275	CCDC80
276	FBXL15
277	AURKB
278	EVI2A
279	SUN2
280	TBC1D10C
281	KDM6B
282	SPNS2
283	ASF1B
284	AIF1L
285	GABBR1
286	ZNF692
287	FLI1
288	NOTCH3
289	FBLN5
290	MRGPRF
291	ISLR
292	MYH9
293	ECSCR
294	MXD1
295	HSPB7
296	CDKN1B
297	WDR1
298	OLFML1
299	CLDN5
300	ITPKC
301	LST1
302	MB
303	PRUNE2
304	CD14
305	PEAR1
306	STAB1
307	MCL1
308	IGFBP4
309	TIPARP
310	GPC3
311	ARRDC2
312	PAK1IP1
313	C11orf96
314	EPHB4
315	CARD10
316	SPARC
317	ACSL1
318	JAG2
319	STK40
320	ACLY
321	COL3A1
322	ARID5A
323	CCNA2
324	GAS2L1
325	B2M
326	EPSTI1
327	SLIT3
328	MKI67
329	ARHGAP4
330	LGALS12
331	TRMT10C
332	UTP3
333	SAMSN1
334	DTNA
335	DUSP1
336	ICAM2
337	ZNF853
338	IRF2BP2
339	LUM
340	ABTB1
341	NFIC
342	BCL9L
343	FOXO4
344	VAMP8
345	CST7
346	CASKIN2
347	MARS
348	XPNPEP2
349	RCAN2
350	NPNT
351	CDCA3
352	CXCR4
353	RHOB
354	AVPI1
355	PAM
356	LDHD
357	APMAP
358	ME1
359	CYTIP
360	COL4A1
361	CMPK2
362	DES
363	APOLD1
364	PPFIA4
365	NEDD9
366	SOX10
367	CYBA
368	MNDA
369	TSPAN13
370	SOX18
371	GPX3
372	DDIT3
373	SLC6A9
374	CEP55
375	MUSTN1
376	LAMA2
377	ITGA7
378	RPRD2
379	ERRFI1
380	INTS3
381	ITIH3
382	TRAF3IP3
383	VASN
384	MAP2K3
385	LUC7L
386	CD52
387	MYO1G
388	LYVE1
389	SMARCD2
390	SLCO4A1
391	KANK3
392	MFAP4
393	UGCG
394	MXI1
395	ANKRD9
396	ATP1A1
397	FKBP10
398	PCOLCE2
399	LTBP2
400	DBN1
401	GNA15
402	TFEC
403	IARS
404	NNMT
405	DNAJB5
406	DUSP2
407	GUCY1A3
408	GPR133
409	DOK3
410	PI16
411	C1orf198
412	CCDC84
413	IFI44L
414	TK1
415	MEF2D
416	SMCR8
417	P2RX1
418	DPYSL3
419	FGR
420	LDB2
421	RXRA
422	GLTPD1
423	EGFL7
424	S100A9
425	INPPL1
426	EPAS1
427	LNX1
428	SRRM2
429	TBX2
430	GUCY1B3
431	RASSF5
432	EFNB1
433	HYOU1
434	E2F4
435	DGAT2
436	ETS1
437	LIMS2
438	EMCN
439	CCNB2
440	CALCOCO1
441	ACP5
442	C20orf24
443	TCF7L1
444	PDIA6
445	NOTCH1
446	GADD45B
447	PPP1CB
448	PLA2G2A
449	HLA-DMB
450	NCOA5
451	APOBR
452	URB2
453	SORBS1
454	COMTD1
455	PSMB8
456	TMPRSS2
457	DDIT4
458	SYNM
459	RNASE1
460	EGR3
461	CD63
462	TOB1
463	PRC1
464	CEBPB
465	DENND3
466	ANGPTL1
467	DYSF
468	ARHGAP10
469	EGR1
470	CCNG2
471	PALM
472	PPAP2B
473	CCNL2
474	ICAM1
475	SPINT1
476	PYCARD
477	CBX6
478	DNAJB4
479	PDGFRA
480	CCDC85C
481	ETS2
482	GIMAP7
483	TGFBR2
484	PLIN1
485	RAMP2
486	JUN
487	IL2RG
488	MX1
489	CAMK2G
490	CD34
491	FABP4
492	HCST
493	PCOLCE
494	ENO2
495	KCNAB2
496	CKMT2
497	FURIN
498	PCDH1
499	RPS6KA1
500	RBPMS
501	RARA
502	BTAF1
503	PLP1
504	SERPINB5
505	PIK3AP1
506	SOX12
507	CD248
508	OGN
509	FCGRT
510	SYNPO
511	DENND1C
512	TNNC1
513	PID1
514	COL4A2
515	TRIB1
516	RUNX3
517	LUC7L3
518	FIBIN
519	CDKN2D
520	DMTF1
521	CKM
522	CLK1
523	CLUH
524	PTPN7
525	PLVAP
526	PARM1
527	PPARG
528	ENO1
529	FAM180B
530	UAP1
531	TLDC2
532	TMEM204
533	IFIT2
534	NPDC1
535	ORMDL1
536	PREX1
537	B4GALT1
538	GPR124
539	PELI1
540	SPDEF
541	KIAA1324
542	HES4
543	BGN
544	GYG2
545	COL12A1
546	CHD1
547	ALDOA
548	PRKCH
549	CYBRD1
550	SPAG5
551	KLF6
552	VCAN
553	CH25H
554	PIM1
555	ADAM33
556	LAMC1
557	ECM1
558	NCAPH
559	PPP1R1B
560	CFI
561	GPAM
562	SRF
563	LMNA
564	ELOVL5
565	PIK3IP1
566	CLEC10A
567	PLSCR1
568	IFIH1
569	GPR56
570	ANLN
571	WFDC1
572	GRN
573	MYBL2
574	THRSP
575	RBM14
576	ADAMTS1
577	UBE2L6
578	CREBZF
579	RPS6KA2
580	ZBTB4
581	COL6A2
582	DEK
583	IL1R2
584	FBP1
585	HDAC5
586	PNRC1
587	PDGFRL
588	PTTG1
589	CD6
590	DLL4
591	FAM110D
592	DHCR7
593	NPC2
594	ISG15
595	SPATA2L
596	RAB9B
597	REEP1
598	LIPE
599	SEMA3F
600	IQGAP3
601	PLEKHO1
602	GIGYF1
603	S100A8
604	RGS16
605	SHFM1
606	KIAA1522
607	ARL5B
608	MAL
609	PDLIM3
610	NAB2
611	PCYT2
612	EP300
613	PPM1F
614	MYH14
615	AGPAT2
616	AVPR2
617	ULK1
618	ANXA1
619	GNAZ
620	SLC39A14
621	IFI27
622	KAT2A
623	MIB2
624	CCL2
625	GAS7
626	TCEAL1
627	SNTB1
628	ZFC3H1
629	PSMB9
630	IFITM1
631	KDM3A
632	LIFR
633	HES1
634	KLF13
635	DUSP14
636	BTK
637	HEG1
638	CAV1
639	PTPRF
640	GSN
641	MECOM
642	SAMD9L
643	MFNG
644	VIM
645	RHOT2
646	BAD
647	SLC7A8
648	FAIM3
649	DHCR24
650	HPS6
651	SELM
652	ANKRD37
653	MYOZ1
654	CCR1
655	MAMDC4
656	GPR183
657	L1CAM
658	ENG
659	AHSA1
660	NFKB2
661	NRBP2
662	BUB1
663	COL1A1
664	RBP4
665	HSPH1
666	GRASP
667	ITGA6
668	CYR61
669	BYSL
670	ITGA8
671	TMC8
672	PRKAB2
673	ITGA11
674	KCNAB1
675	NDST1
676	TREM2
677	RASSF4
678	NOL6
679	GAS1
680	IER3
681	THEMIS2
682	MBNL1
683	LAMB1
684	NTN1
685	CCDC107
686	ELN
687	LMAN2
688	IRF2BP1
689	MYBBP1A
690	IQCJ-SCHIP1
691	CXCL14
692	RUVBL1
693	EHD4
694	PSMD14
695	SORL1
696	HBEGF
697	GPR97
698	SMARCC2
699	TIA1
700	METRNL
701	KIF2C
702	CTSD
703	ACADVL
704	C10orf128
705	EFHD1
706	EFNA1
707	LY86
708	DOCK9
709	FAM129B
710	HMHA1
711	ARHGAP31
712	ARHGEF17
713	SRPX
714	TYMS
715	H1FX
716	LIMD2
717	C9orf142
718	RND3
719	NR2F2
720	TKT
721	SFRP2
722	CPA3
723	CCNI
724	MAP3K6
725	SETD5
726	KIFC3
727	CD8A
728	FOSB
729	PADI2
730	SERPINA1
731	FOS
732	ADAM15
733	CLP1
734	MAP1A
735	CRIP2
736	PLOD1
737	LAMB2
738	PLEKHB1
739	CNTFR
740	SLC3A2
741	SLC25A36
742	MYL6
743	PNN
744	PXN
745	AHDC1
746	TNFAIP3
747	FAP
748	CLEC3B
749	EPCAM
750	DBI
751	XBP1
752	RGS5
753	GIMAP8
754	NFKBIA
755	FYB
756	RPS19BP1
757	ARHGAP29
758	CPQ
759	TPPP3
760	IRF2BPL
761	GZMA
762	MEOX2
763	PPP1R1A
764	ANG
765	MYL2
766	TACC3
767	LYN
768	DST
769	TACSTD2
770	PSAP
771	HERC6
772	TMEM173
773	PKMYT1
774	OGT
775	MYL1
776	CD3D
777	PDE2A
778	CDCA8
779	TAOK2
780	SRCAP
781	FGD3
782	C10orf2
783	PLK1
784	ALDH4A1
785	PDIA4
786	ATOH8
787	MXRA8
788	PBK
789	SH3BP4
790	SEMA3G
791	FGFR1
792	NUF2
793	ASPH
794	ERF
795	NKTR
796	SFRP5
797	INSIG1
798	LMO2
799	PINK1
800	LTV1
801	EGLN3
802	LMO7
803	SEMA4B
804	KCNQ1
805	ENTHD2
806	P4HB
807	ST14
808	AGTRAP
809	ESRP1
810	RARRES3
811	RELB
812	COL14A1
813	ZBTB21
814	PLTP
815	LPHN3
816	EPS8L1
817	MMRN1
818	BUB1B
819	FOXC1
820	PTPRG
821	MKNK2
822	ABI3BP
823	CD69
824	PPARGC1A
825	NES
826	USP2
827	AKAP8L
828	WNT9A
829	RUNX1
830	ABCA6
831	CARD11
832	SLC29A2
833	ALDH1L1
834	THOC1
835	TSPAN18
836	DAAM2
837	EXOC7
838	ACTA1
839	CNR1
840	IER5L
841	CLDN1
842	C12orf44
843	TSPO
844	CALM3
845	MVP
846	FAM46B
847	KIF26A
848	PNMT
849	CKAP4
850	ADORA3
851	DPP4
852	SQSTM1
853	FRY
854	ATXN7
855	HEMK1
856	GCC1
857	TSPYL2
858	TXNRD1
859	ATP9A
860	VAT1
861	NEK7
862	ZYX
863	HIPK3
864	SLC20A2
865	SMAD6
866	OSER1
867	CLMP
868	CREBBP
869	HSD17B6
870	ANXA6
871	SYTL3
872	TCERG1
873	RAB3IL1
874	MARCH3
875	ITGA5
876	ZFP36L1
877	SCEL
878	CCND3
879	EMP3
880	SMG8
881	LMNB1
882	CTTN
883	MAPK8IP3
884	TMEM88
885	TTK
886	KIF20A
887	FNBP4
888	SSRP1
889	A2M
890	TARBP1
891	KCTD12
892	NDUFB7
893	OAS1
894	PDK4
895	ARGLU1
896	PIM3
897	SELL
898	SLC27A4
899	SOX17
900	FAM53B
901	SOX13
902	CSF2RB
903	PFKFB3
904	DDR1
905	SAMD4A
906	SLCO2A1
907	ACTC1
908	MUC1
909	ITM2B
910	RAI2
911	DPH2
912	RICTOR
913	LPAR1
914	TNNC2
915	SNRNP70
916	LZTS2
917	C19orf43
918	TNIP1
919	MYBPC1
920	EFHD2
921	RLTPR
922	GPRC5C
923	THBS2
924	ECM2
925	CFL2
926	CIDEA
927	EMP1
928	LIPA
929	SEMA3C
930	MANF
931	SPOCK1
932	PARP12
933	TRMT1
934	MYO1B
935	FHOD3
936	VASP
937	CREBRF
938	UNC119B
939	SCNN1A
940	CPXM2
941	DLGAP5
942	LCP2
943	UBTD1
944	CYP27A1
945	KIF23
946	PHF21A
947	DDAH2
948	EMILIN1
949	TUSC5
950	EFCAB4A
951	TLL1
952	SERPINF2
953	C4orf48
954	TMEM47
955	BAZ2A
956	MRPS6
957	IFRD1
958	NDUFA4L2
959	JAK2
960	MTPN
961	IRS2
962	GPR34
963	NEURL1B
964	NBEAL2
965	ARHGEF25
966	ZMYM3
967	TP53INP1
968	SQLE
969	ADORA1
970	RLF
971	MEOX1
972	MEDAG
973	LTBP4
974	MCM2
975	CENPF
976	SATB1
977	GALNT2
978	ID1
979	TMOD1
980	PIK3R6
981	MPZ
982	MSRB1
983	CCDC88B
984	FAM166B
985	NISCH
986	NFKBIZ
987	ITGBL1
988	GPIHBP1
989	EDNRA
990	PACS1
991	HLA-DPB1
992	FZD1
993	MGLL
994	COL6A1
995	KLF2
996	KIF5B
997	PPP1R16B
998	PHF3
999	CMIP
1000	GLT1D1
1001	MICAL1
1002	MYO9B
1003	SCARA3
1004	SHROOM3
1005	HLA-DRA
1006	TBC1D8
1007	KRT5
1008	EPS8
1009	YPEL5
1010	CREM
1011	GFRA3
1012	RAB32
1013	RASSF7
1014	SNX9
1015	EGR2
1016	S100A12
1017	C19orf10
1018	TM4SF1
1019	PPAN
1020	TMEM219
1021	PLA2G7
1022	FAM20C
1023	HEPH
1024	SPOCK2
1025	NOSTRIN
1026	HMG20B
1027	CRTAP
1028	ADAMTS2
1029	KRT23
1030	BCL6B
1031	ARHGEF10L
1032	BCOR
1033	CEBPA
1034	WDR81
1035	MAGED1
1036	PDE4D
1037	AJUBA
1038	VNN2
1039	ZZEF1
1040	PHB2
1041	SLIT2
1042	IGFBP7
1043	PLAUR
1044	ANTXR2
1045	P4HA2
1046	PRPF6
1047	HIF1A
1048	CLDN3
1049	ADCY5
1050	SELP
1051	ARHGAP12
1052	CTSA
1053	SLC6A6
1054	DDX39A
1055	KCNA5
1056	SMAD7
1057	EPHA2
1058	TMEM63A
1059	COMMD6
1060	TEAD4
1061	SLC12A2
1062	AATK
1063	PSTPIP1
1064	NOD1
1065	SF1
1066	GAB2
1067	CCND1
1068	GATA6
1069	VANGL2
1070	NFE2
1071	MAP4
1072	HADH
1073	CSF3
1074	KLHDC2
1075	POLR2K
1076	CD7
1077	MFSD2A
1078	GLIPR2
1079	VWA5A
1080	MAFK
1081	SARS
1082	FOLR1
1083	SREBF2
1084	IFNGR1
1085	JMJD1C
1086	TPP1
1087	PPL
1088	PRDM1
1089	SFRP4
1090	ATG16L2
1091	CST3
1092	RASAL2
1093	WFDC2
1094	HTRA1
1095	PODXL
1096	LOX
1097	DKC1
1098	FAM20A
1099	IMP3
1100	KDR
1101	KLHDC8B
1102	WDTC1
1103	RPS21
1104	CA4
1105	COLEC12
1106	RGMA
1107	COL16A1
1108	NOTCH4
1109	MAMDC2
1110	SDC2
1111	PDZRN4
1112	AKAP12
1113	PLXNB1
1114	TAB2
1115	PKN1
1116	FADS3
1117	ZDHHC12
1118	TMBIM1
1119	LHX6
1120	POMP
1121	TRMT13
1122	MYO5C
1123	LY6E
1124	ZNHIT2
1125	PTP4A3
1126	TIMP4
1127	CARD9
1128	RBM5
1129	IER5
1130	ZBTB7C
1131	EPHX1
1132	THBD
1133	SCN7A
1134	TIMP1
1135	RBM24
1136	DBNDD2
1137	ANTXR1
1138	CPVL
1139	PLA2G16
1140	S100A4
1141	PMP22
1142	SLC39A1
1143	PDE3A
1144	BAIAP2
1145	ECHS1
1146	MON2
1147	TRAF4
1148	CREB5
1149	PSMA4
1150	ZBTB40
1151	SDF2L1
1152	DEDD2
1153	DGCR8
1154	DEF6
1155	HID1
1156	BAG3
1157	RGS1
1158	MYRF
1159	SELENBP1
1160	NPL
1161	CEP170B
1162	C1orf122
1163	ABL1
1164	PLCB4
1165	LGR6
1166	FCER1A
1167	HNMT
1168	IRF7
1169	EBP
1170	TMEM35
1171	KCTD11
1172	STARD9
1173	KCNIP2
1174	FAM65B
1175	AP1G2
1176	GOT1
1177	RABAC1
1178	PNPLA2
1179	CSDC2
1180	SFRP1
1181	LTB
1182	RERGL
1183	EPS8L2
1184	LPCAT4
1185	FNDC1
1186	NRGN
1187	ETNK2
1188	TSC22D2
1189	ABCA8
1190	ACVR1B
1191	YARS
1192	PSME4
1193	C19orf59
1194	ATP2A3
1195	GPT2
1196	RSPO3
1197	SH3PXD2B
1198	CCNB1
1199	ATP5G1
1200	DHX37
1201	ABLIM3
1202	E2F1
1203	SRM
1204	SNRK
1205	GNA13
1206	PRR15L
1207	LPL
1208	S100A6
1209	THY1
1210	NDRG2
1211	MVD
1212	CTGF
1213	MYO7A
1214	MAK16
1215	MRPS12
1216	CDKN3
1217	MPP7
1218	SHB
1219	C10orf137
1220	DAK
1221	FAM173A
1222	SOD3
1223	ECH1
1224	MAF
1225	PDE9A
1226	SLC43A3
1227	GZMM
1228	MAPKAPK2
1229	SRXN1
1230	CD5
1231	TYK2
1232	PDE7A
1233	CES4A
1234	DAB2
1235	FCN1
1236	C7orf41
1237	STARD4
1238	CD27
1239	BCL6
1240	PHLDA3
1241	ZNF574
1242	RECK
1243	EFNB2
1244	HUWE1
1245	ALCAM
1246	PRPF19
1247	TRIM44
1248	KCNN4
1249	GPATCH4
1250	TLN1
1251	MFGE8
1252	FAM168B
1253	CKB
1254	IGIP
1255	AEBP1
1256	PDLIM2
1257	C15orf39
1258	UBALD1
1259	WNK1
1260	SFN
1261	SIX5
1262	HTRA3
1263	PER3
1264	ABLIM1
1265	HEY2
1266	C20orf27
1267	METTL3
1268	CCDC71L
1269	C1QTNF1
1270	LY9
1271	ELF1
1272	DACT1
1273	ATP5J
1274	EFEMP2
1275	CALM1
1276	FAM69B
1277	RAMP1
1278	SLC2A4RG
1279	MZF1
1280	ADRM1
1281	PXMP2
1282	PCDHGC3
1283	N4BP2L1
1284	LAMA3
1285	RBM25
1286	CENPM
1287	PTPN23
1288	SRPX2
1289	TCEA3
1290	EHD1
1291	PPP1R12A
1292	GPX4
1293	GPC1
1294	ABHD5
1295	TRIO
1296	NME1
1297	CD74
1298	ZNF691
1299	TCAP
1300	RPS5
1301	EPDR1
1302	ARHGAP35
1303	TCIRG1
1304	FAU
1305	PACSIN2
1306	SERPINE1
1307	LMCD1
1308	GMNN
1309	SIDT2
1310	STK38L
1311	CHCHD10
1312	ADRB2
1313	CLIC3
1314	SNCG
1315	ZNF536
1316	GPT
1317	CAP2
1318	RRP12
1319	SNX20
1320	MMP28
1321	UQCRQ
1322	UBE2T
1323	PREPL
1324	MEF2C
1325	HERPUD1
1326	TEAD3
1327	TBX1
1328	MFSD3
1329	B3GNT5
1330	CDC42SE1
1331	TWF2
1332	IQGAP2
1333	GATA2
1334	RPN1
1335	ATP2A2
1336	DBP
1337	ZBTB47
1338	FLOT1
1339	FAM65C
1340	SLC1A3
1341	FAM160A2
1342	BRD8
1343	NCALD
1344	F10
1345	GLT8D2
1346	DLGAP4
1347	CELF2
1348	TSC22D1
1349	ITGAV
1350	CTSF
1351	NUP210
1352	DNAJA4
1353	IL4R
1354	GZMK
1355	S100A10
1356	IRF5
1357	RGL1
1358	RORA
1359	SLC1A5
1360	PNPLA6
1361	CALML5
1362	STK36
1363	RPN2
1364	CRIM1
1365	PCK2
1366	PHPT1
1367	ADRBK1
1368	IP6K2
1369	ANKRD29
1370	ACTN2
1371	ASPM
1372	B4GALT5
1373	G6PD
1374	THBS1
1375	ABCC5
1376	PIK3R3
1377	PRRT4
1378	PAN2
1379	CNFN
1380	FCHSD1
1381	P2RX5
1382	RPGR
1383	WBSCR17
1384	TCF4
1385	GTF3A
1386	KCNQ4
1387	C5orf30
1388	MKL2
1389	CXXC1
1390	MRAP
1391	AGPAT1
1392	TAGAP
1393	FAM229A
1394	SHMT2
1395	SURF4
1396	TNNI2
1397	GPD1L
1398	MFSD1
1399	EDNRB
1400	PKP1
1401	SMARCD3
1402	RBM47
1403	NTF3
1404	PLD3
1405	ST6GALNAC6
1406	DNAJB9
1407	PCK1
1408	TP53I11
1409	ZBTB7A
1410	DDX60
1411	GARS
1412	ACSS2
1413	ASAP3
1414	CAPN3
1415	OAF
1416	MAP3K8
1417	PYGM
1418	PYGB
1419	RAB23
1420	SYNGAP1
1421	C14orf180
1422	PPP1R35
1423	MGP
1424	FMNL2
1425	LGALS1
1426	PGM1
1427	TMTC1
1428	ASAH1
1429	BHLHE41
1430	DSP
1431	WNT5B
1432	ECHDC2
1433	SLC5A6
1434	CDC42EP3
1435	NTRK2
1436	NDUFA1
1437	MFSD5
1438	SAT1
1439	SCFD2
1440	RAB25
1441	HOXB2
1442	MAU2
1443	RASD1
1444	SYNPO2
1445	NT5E
1446	COL4A6
1447	FAM198A
1448	SGK2
1449	SKIL
1450	MLPH
1451	HOPX
1452	PCBP4
1453	NXPH3
1454	SLC39A7
1455	NAT10
1456	EIF4G1
1457	DTX3
1458	CD79A
1459	CLIP3
1460	YWHAH
1461	NARS
1462	UCHL1
1463	C14orf159
1464	CTSZ
1465	DYNC1H1
1466	ALOX15B
1467	G0S2
1468	IGSF9
1469	RGL2
1470	LCN2
1471	PDGFD
1472	PLA2G4F
1473	SRRT
1474	ZNF638
1475	ATP5B
1476	FXYD1
1477	ARHGEF40
1478	PTGS2
1479	ARMC6
1480	ZCCHC24
1481	LDHB
1482	IFNGR2
1483	PHLDA1
1484	SREK1
1485	MAPK4
1486	GIMAP5
1487	PXDC1
1488	SUPT6H
1489	PICALM
1490	AMIGO2
1491	IGF1
1492	BRD4
1493	ITGB4
1494	DUSP23
1495	ACADL
1496	LINGO1
1497	MRAS
1498	HDAC7
1499	EMD
1500	SREBF1
1501	MYEOV2
1502	UNC5B
1503	HSPB6
1504	NXF1
1505	HMMR
1506	ZBTB7B
1507	MME
1508	EGFLAM
1509	GIPC2
1510	PYCR1
1511	SLC12A6
1512	UBXN10
1513	MAP4K4
1514	WDFY4
1515	ABCB8
1516	FMOD
1517	TRNP1
1518	TXNIP
1519	HEYL
1520	FAM43A
1521	LRRC10B
1522	KRT7
1523	VEGFB
1524	JHDM1D
1525	PALMD
1526	S100B
1527	UBA7
1528	GADD45G
1529	FAM46C
1530	WISP2
1531	YKT6
1532	TGM2
1533	AARS
1534	UTRN
1535	GBE1
1536	SECTM1
1537	FRZB
1538	FAM180A
1539	GRB7
1540	APLN
1541	HOXD8
1542	GPC4
1543	SMAD3
1544	FA2H
1545	MYL3
1546	MAZ
1547	ADAM8
1548	SPON2
1549	CTSG
1550	PAMR1
1551	ATF7IP
1552	HSPB8
1553	STC1
1554	ID3
1555	CHST3
1556	CPA1
1557	PPP2R2B
1558	TGM1
1559	COL9A3
1560	GADD45GIP1
1561	ARHGEF12
1562	HPGDS
1563	FKBP3
1564	ATP2B4
1565	IGSF6
1566	CSTA
1567	BICC1
1568	MAP1LC3A
1569	TMED9
1570	RASAL3
1571	SGCD
1572	MATN2
1573	ELOVL1
1574	CISH
1575	ID4
1576	DGKG
1577	PPP1R9B
1578	IL33
1579	CHMP2A
1580	SPR
1581	SPRY1
1582	FANCI
1583	AGAP2
1584	NCK2
1585	SSC5D
1586	TFF3
1587	SLC7A1
1588	BCS1L
1589	LGI4
1590	NGFR
1591	CLPS
1592	ARL4C
1593	AP1B1
1594	PRDX4
1595	FBXO31
1596	LIF
1597	MXD4
1598	YDJC
1599	SPAG1
1600	CENPA
1601	ACY1
1602	PHLDA2
1603	PPP1R12C
1604	ASPN
1605	SLC44A2
1606	CAPN5
1607	STK38
1608	CORO1C
1609	KLHL9
1610	TP53I3
1611	INPP4B
1612	DVL1
1613	ITGA4
1614	MPZL2
1615	ISOC2
1616	SOX8
1617	AIP
1618	DAB2IP
1619	ODF3B
1620	XKRX
1621	KLF16
1622	MAOB
1623	CELSR2
1624	HEXB
1625	CDC45
1626	PLEKHF1
1627	CMTM5
1628	COX6A2
1629	PROCR
1630	NR2C1
1631	RBM26
1632	TRAK2
1633	ZNF503
1634	YTHDC1
1635	SNED1
1636	DNER
1637	FBXO32
1638	CD81
1639	CREBL2
1640	NDUFAB1
1641	FRMD6
1642	SNAI1
1643	SEC61A1
1644	PPP1R18
1645	APOD
1646	PRR7
1647	PLA2G1B
1648	PRKG1
1649	ORAI3
1650	CDC42EP4
1651	WEE1
1652	PPP1R3C
1653	SGMS2
1654	SELE
1655	EEF2
1656	ATP5E
1657	MFSD6
1658	ADAM9
1659	RGS3
1660	USP53
1661	TTC9
1662	CCDC3
1663	MTSS1L
1664	SERTAD3
1665	IL1R1
1666	TMEM2
1667	TMEM255B
1668	APBB3
1669	ZNF629
1670	DUSP16
1671	OTUD1
1672	CHRDL1
1673	CYFIP2
1674	BMP1
1675	MPP1
1676	PGF
1677	MDFI
1678	KLK5
1679	IGFBP2
1680	MAPRE3
1681	NR2F6
1682	RAPGEF3
1683	TGFB1
1684	HOXB7
1685	EPB41L4B
1686	TMED7
1687	CALB2
1688	MINK1
1689	RELT
1690	FUS
1691	HDC
1692	GBA2
1693	WARS
1694	HOXA4
1695	PLXNC1
1696	THOC6
1697	AMPD2
1698	VIPR1
1699	SEMA7A
1700	IL1RN
1701	FXYD3
1702	FRAT2
1703	TOMM5
1704	CCDC85A
1705	LSM10
1706	PPP1CA
1707	BCL2L1
1708	NUCB1
1709	KIFC2
1710	PRSS8
1711	CORO2B
1712	F8
1713	GATSL3
1714	DOK4
1715	TUBA8
1716	MYD88
1717	SLC22A17
1718	MAPRE2
1719	RHOH
1720	MEPCE
1721	FAM213B
1722	SLC38A1
1723	FAM189A2
1724	CBX4
1725	BCAT2
1726	QTRT1
1727	SNX21
1728	PCDH12
1729	RALGDS
1730	MS4A1
1731	ZMIZ2
1732	EMC7
1733	CYB5A
1734	DGAT1
1735	SLC7A6
1736	MARCO
1737	BST2
1738	LATS2
1739	FARSA
1740	DCTN1
1741	RASSF1
1742	ADRA2C
1743	NOC3L
1744	CITED2
1745	RAD54L
1746	CTD-2369P2.12
1747	NFASC
1748	SCARF2
1749	FOXS1
1750	NRARP
1751	CDK18
1752	COX8A
1753	AGFG2
1754	ARHGDIA
1755	ITGA1
1756	FERMT2
1757	RYR2
1758	HSD17B11
1759	H1F0
1760	PTPRCAP
1761	KAZN
1762	CERKL
1763	CD36
1764	CSNK2A2
1765	ALDH1L2
1766	TGIF1
1767	PFKFB4
1768	C12orf75
1769	DMPK
1770	OLFM1
1771	BNC2
1772	CNST
1773	CPA2
1774	NRXN1
1775	IFRD2
1776	ANO1
1777	CALHM2
1778	COL8A2
1779	SGCA
1780	DPT
1781	KDELR3
1782	GPR65
1783	CYSTM1
1784	ACADM
1785	CC2D1A
1786	EIF3G
1787	WNK2
1788	CLIP2
1789	TRIM29
1790	FAM160B2
1791	CPNE2
1792	SMOC2
1793	ANKRD1
1794	KTN1
1795	VARS
1796	AGPAT9
1797	KLF5
1798	PVRL1
1799	KDELR2
1800	FEM1C
1801	HIPK2
1802	OVGP1
1803	CEBPG
1804	MCM7
1805	LAD1
1806	ZNF512B
1807	IL17D
1808	LBH
1809	PDE4B
1810	ADAMTSL4
1811	SLC4A11
1812	DCHS1
1813	EGFR
1814	APBB1IP
1815	MCM5
1816	ROMO1
1817	NCAM1
1818	NR1D2
1819	SLC38A2
1820	MFI2
1821	ING1
1822	PROK2
1823	TM7SF2
1824	SRSF7
1825	TEF
1826	AGRN
1827	FUCA1
1828	HOOK2
1829	EBF2
1830	ALDH2
1831	PC
1832	NDEL1
1833	HIST1H1C
1834	C1orf115
1835	CTXN1
1836	USP11
1837	CRELD1
1838	KIF13B
1839	YWHAG
1840	SGK223
1841	DDAH1
1842	SKAP1
1843	SEPT5
1844	PPIC
1845	CLDN7
1846	ZNF189
1847	FUBP1
1848	JOSD2
1849	APP
1850	ACKR3
1851	MEIS1
1852	SLC43A1
1853	TM4SF18
1854	NELL2
1855	HSD11B1
1856	GDI1
1857	INPP5D
1858	SH3BGRL3
1859	SLC26A6
1860	PFKFB2
1861	MLEC
1862	ST3GAL5
1863	PLEC
1864	BMF
1865	DAG1
1866	PLXND1
1867	C9orf72
1868	ADM5
1869	NAGLU
1870	ABHD8
1871	TSPAN2
1872	STK39
1873	MYLPF
1874	CADM3
1875	C15orf52
1876	KYNU
1877	FAM83G
1878	TIMELESS
1879	MESDC1
1880	ITM2A
1881	SCN4A
1882	MTFP1
1883	CHAC1
1884	BCORL1
1885	GALK1
1886	GSTP1
1887	TSPAN11
1888	ABI3
1889	TRIM8
1890	CYP2J2
1891	CMC2
1892	MN1
1893	NCDN
1894	CNPY3
1895	LTBP3
1896	AFAP1L1
1897	PRR12
1898	NEBL
1899	CIC
1900	RTP4
1901	HSPG2
1902	EIF4EBP3
1903	SP110
1904	SF3A2
1905	CRY2
1906	C15orf48
1907	BRIX1
1908	IL8
1909	GCA
1910	LCN10
1911	EBF1
1912	MYOM1
1913	B3GNT2
1914	TTYH3
1915	CREG1
1916	REG1A
1917	CLU
1918	SULF2
1919	ACIN1
1920	RCN3
1921	TRAFD1
1922	CREB3L1
1923	GCDH
1924	ZKSCAN8
1925	MLLT4
1926	ANPEP
1927	DLC1
1928	FAM102A
1929	UXT
1930	ADM
1931	GLYCTK
1932	CTHRC1
1933	GNB2
1934	BTG3
1935	CIRH1A
1936	SRPK1
1937	ARG1
1938	S100A14
1939	ALDH1A1
1940	TENC1
1941	THSD4
1942	PLBD1
1943	PAIP2
1944	NFATC4
1945	MS4A2
1946	LRRC8C
1947	USP5
1948	RRAGD
1949	NPR3
1950	PLEKHG1
1951	COL4A5
1952	PRIMA1
1953	HAS1
1954	RFX2
1955	RNASET2
1956	KDM3B
1957	FILIP1L
1958	SEPSECS
1959	GDF10
1960	KLHL17
1961	ITPR1
1962	MYO1D
1963	RTKN
1964	EBF3
1965	IFFO2
1966	ACACA
1967	CA9
1968	SLPI
1969	LSR
1970	KCTD2
1971	PNLIP
1972	BATF
1973	TLE2
1974	GMPPA
1975	MYRIP
1976	TMEM86A
1977	DECR1
1978	PTPDC1
1979	LRP3
1980	ATP6V0A4
1981	SLC9A3R1
1982	RGCC
1983	ERBB2
1984	TMEM147
1985	PRRX2
1986	PLS3
1987	VLDLR
1988	TMEM43
1989	FAM219B
1990	PDE1B
1991	PLAU
1992	SMPD3
1993	PKIG
1994	PLP2
1995	PACSIN3
1996	ZNF750
1997	CXCL3
1998	NRD1
1999	TSPAN5
[truncated: 7,918 more rows]

## Sheet: TE-IR
rank	hub
1	TMEM160
2	RBM14
3	ZMAT1
4	PPP1R10
5	ODC1
6	MGEA5
7	KLHL9
8	SRRM2
9	SRSF11
10	ZNF692
11	ARGLU1
12	PPRC1
13	LUC7L3
14	DUSP1
15	FOSL2
16	XPO1
17	PNISR
18	PNN
19	PTMS
20	CCDC85B
21	ZRANB2
22	HMGB2
23	APBB3
24	YJEFN3
25	CLK1
26	C4orf48
27	PRR24
28	UNC119B
29	TIA1
30	H1FX
31	CEBPA
32	CREBRF
33	ZSCAN18
34	CIRBP
35	NR4A3
36	MASP2
37	MTPN
38	IGIP
39	ANKRD9
40	FOS
41	SGK494
42	STARD9
43	H1F0
44	SESN1
45	PHF1
46	RNF122
47	ERF
48	PPDPF
49	HEMK1
50	NR4A2
51	SAP18
52	MAMDC4
53	C5orf54
54	SLC38A2
55	DPAGT1
56	GIMAP6
57	S100A4
58	NR2F6
59	FUBP1
60	SRSF7
61	SLC6A6
62	C7orf41
63	RHOB
64	SREK1
65	CCNG2
66	PREPL
67	SPR
68	CBX7
69	DAK
70	INTS3
71	SERTAD3
72	SLC2A4RG
73	STK36
74	BRD8
75	LTV1
76	ZFC3H1
77	IRF2BP2
78	JUN
79	LUC7L
80	NAB2
81	TP53INP1
82	ZKSCAN8
83	IVNS1ABP
84	GLUL
85	NCOA5
86	DDIT3
87	NOP2
88	BTAF1
89	NOTCH1
90	LRIF1
91	GLYCTK
92	ZNF691
93	FAM160A2
94	NEDD9
95	PHF23
96	SLC25A36
97	S1PR1
98	ARID5B
99	CCNL1
100	PRKAB2
101	FNBP4
102	CEBPB
103	MYC
104	RPS6KA2
105	FAM214A
106	ARRDC3
107	TRAPPC5
108	KLF16
109	PGAP2
110	HNRNPH3
111	SIK1
112	SLC19A2
113	RARA
114	HBEGF
115	AKAP8L
116	FAM193B
117	TRMT13
118	HAAO
119	SH3BGRL
120	NFIL3
121	HIST1H1C
122	TSPYL2
123	C20orf24
124	ZBTB21
125	BCOR
126	OGT
127	AVIL
128	TRAM1
129	CCDC47
130	CDC42EP2
131	DDX17
132	PNPLA6
133	ATG16L2
134	FUS
135	TMEM234
136	ETV6
137	RPUSD1
138	SLC3A2
139	MRPS6
140	CENPT
141	ASXL1
142	ZNF512
143	MBD3
144	ZMYM3
145	ZNF395
146	UTP3
147	SPARC
148	ELL
149	RRAS
150	CDKN1B
151	PRPF38B
152	ARL5B
153	ZBTB40
154	SLC25A25
155	DYRK1B
156	CSRNP1
157	TMEM141
158	ZNF853
159	ATP5E
160	KDM3A
161	CMTR2
162	KLHDC2
163	HIST1H2BG
164	BHLHE40
165	CCDC80
166	TIMP1
167	ZNF444
168	NRBP2
169	INPPL1
170	TUBE1
171	OTUD1
172	RASIP1
173	COMMD6
174	PNRC1
175	METTL3
176	PPP1R3E
177	PDIA6
178	AMPD2
179	DMTF1
180	PALLD
181	SLC23A3
182	TRAF4
183	FXYD1
184	RBM33
185	COL5A2
186	FAM229A
187	PLA2G6
188	RXRA
189	AHSA1
190	ATF3
191	TRIB1
192	SPARCL1
193	KAT2A
194	CALCOCO1
195	MXI1
196	CC2D1A
197	NIT2
198	TRIP10
199	RPN2
200	ZFP36L1
201	MFSD5
202	FEM1C
203	NSMCE1
204	AFF4
205	NRARP
206	OVGP1
207	DDIT4
208	NID1
209	FAM53B
210	LDB1
211	HPRT1
212	ZFP36
213	B4GALT1
214	STX4
215	NCKAP5L
216	MID1IP1
217	ZNF248
218	COL4A1
219	SALL2
220	ZNF574
221	BAG3
222	LYRM9
223	TEAD4
224	ADAMTS1
225	CLASRP
226	EIF4EBP3
227	TOB1
228	GIGYF1
229	MAPK8IP3
230	BYSL
231	MARS
232	HPS6
233	TMEM42
234	DNAJB4
235	FOXO4
236	RASSF3
237	TIAL1
238	PNPLA7
239	MRGPRF
240	C15orf39
241	CUEDC1
242	SOX12
243	EGR1
244	EFNA1
245	FADD
246	SLC27A4
247	HIST1H2AC
248	DYNC1LI2
249	TIMP3
250	ZCCHC24
251	METTL22
252	PCBD1
253	NDUFAF3
254	B4GALT5
255	PCED1A
256	VEGFB
257	MXD1
258	GYS1
259	CLP1
260	AGAP3
261	ZDHHC16
262	WDR81
263	CITED4
264	YPEL2
265	CTSO
266	PPP1R9B
267	NDST1
268	ST6GALNAC6
269	CEBPD
270	LCMT2
271	RRP9
272	CALU
273	TCEA3
274	ZMIZ2
275	WBP5
276	MAP3K8
277	ARHGDIB
278	ADAM9
279	MICAL1
280	PCDHGC3
281	KIAA0232
282	ZNF318
283	HSPB6
284	GRASP
285	NEK7
286	ZDHHC12
287	ECM2
288	SPATA2L
289	DEK
290	TIPARP
291	LRP3
292	APOLD1
293	SLC39A1
294	HNRNPA2B1
295	ABCA5
296	ATP5G1
297	SAT1
298	TTC32
299	SCARA5
300	DTX3
301	OSER1
302	SRF
303	ARFGAP1
304	MIDN
305	MFAP4
306	ZBTB16
307	RLF
308	CHD2
309	DUSP14
310	CCDC102A
311	SLC26A10
312	AGTRAP
313	SLC4A2
314	SMO
315	RBM17
316	H2AFJ
317	STK11IP
318	CYP4B1
319	OGN
320	MYH11
321	MYZAP
322	GSTZ1
323	C17orf70
324	GPATCH4
325	FOSB
326	MYL9
327	TBC1D16
328	CHPF2
329	CTSF
330	VAMP1
331	EFEMP2
332	DUSP2
333	BTG2
334	ZNF189
335	C8orf4
336	CAMK2G
337	RICTOR
338	RBM5
339	LCAT
340	FOXO1
341	KDM6B
342	TXNIP
343	PPP1R3C
344	SLC29A2
345	IER5L
346	NXF1
347	CLDN12
348	ABCC5
349	CYYR1
350	MAN1A1
351	ARHGEF1
352	KLHL26
353	IARS
354	CREBZF
355	HEPH
356	APP
357	PLCG1
358	ABCA6
359	OPLAH
360	WEE1
361	ITGAV
362	ITPR3
363	DAPK3
364	EMILIN1
365	CRY1
366	PELI3
367	TRA2A
368	IRF2BPL
369	TSC22D3
370	ADAMTS10
371	SDC3
372	LRRC45
373	PLEKHG4
374	RARG
375	ZNF358
376	LTBP3
377	NCS1
378	MLEC
379	PHC2
380	MB
381	ITPKC
382	YKT6
383	RGP1
384	ELK3
385	HSD17B8
386	IRS2
387	SRCAP
388	PER1
389	PLBD2
390	BBS10
391	CCNI
392	PHF21A
393	DGCR8
394	CPQ
395	R3HDM4
396	FAM46B
397	C5orf51
398	CSK
399	AHDC1
400	KLF15
401	EMD
402	CES4A
403	ASPH
404	CALM3
405	DLL1
406	AJUBA
407	RIC3
408	FASTKD5
409	AMOTL2
410	YWHAG
411	ACAP3
412	PRRT1
413	ORAI3
414	RPL28
415	P2RY11
416	SNRK
417	NR2F2
418	KRT5
419	FAM213B
420	AGER
421	TBX19
422	PTPN1
423	TGFBR2
424	CDK17
425	TPM2
426	KLF6
427	REM2
428	SUN2
429	ACLY
430	CXXC1
431	PRPF39
432	GABBR1
433	ALDH4A1
434	HIST1H1E
435	C16orf58
436	NME1
437	FBXL7
438	SH3D19
439	HEXIM1
440	AVPI1
441	CDH5
442	UFL1
443	PTPRB
444	RHOT2
445	CHMP2A
446	CD163
447	HES1
448	EGR3
449	TACC1
450	CHIC2
451	LUM
452	TMEM165
453	PLEKHF2
454	IFRD1
455	KLF9
456	CKM
457	EZR
458	LTBP4
459	EED
460	GDE1
461	CHCHD10
462	CCS
463	SH3GLB2
464	ABCB8
465	NDEL1
466	TPP1
467	STARD4
468	PLOD1
469	SDPR
470	ITM2A
471	SYNPO
472	IL6
473	THRA
474	MRC2
475	ACSL1
476	PSMD14
477	EPHX2
478	DUSP6
479	EHBP1L1
480	CD93
481	KLF13
482	ACAD11
483	ECHDC2
484	CTC1
485	NUCB1
486	ACY1
487	KIRREL
488	TMEM185B
489	GDI1
490	EGR2
491	LMBR1L
492	RASAL2
493	ZNF449
494	PCDH1
495	MGAT5
496	BMF
497	EMP1
498	SORT1
499	CREM
500	ARID5A
501	IP6K2
502	GADD45B
503	FAM83G
504	CCND1
505	TUBGCP6
506	PTAR1
507	SEPSECS
508	C3orf14
509	BAZ2A
510	KLF2
511	CHD4
512	ATXN7
513	MEPCE
514	ALDH2
515	PRRT2
516	ANKRD37
517	SRRT
518	ITM2B
519	TAGLN
520	MYBBP1A
521	GALNT2
522	TAB2
523	PPP1CB
524	RASGRP2
525	DDR1
526	DIDO1
527	CISH
528	QTRT1
529	PCOLCE2
530	PPP1CA
531	SRSF1
532	NKTR
533	GDPD3
534	LAMB2
535	RCC1
536	SNRNP70
537	CD69
538	PEX12
539	VPS18
540	C1QC
541	FZD7
542	IER5
543	AP4B1
544	SRM
545	HIPK2
546	GAS2L1
547	SNCG
548	SLC7A6
549	RPP25L
550	AIF1L
551	FASTK
552	MBD6
553	ELTD1
554	KIAA1107
555	CPSF6
556	CBX4
557	TUBA4A
558	AMDHD2
559	HDAC5
560	PCYOX1L
561	CDC42EP1
562	IFI16
563	MYL3
564	PTPRG
565	UAP1
566	ARID4A
567	GALK1
568	CSTF3
569	TEK
570	LIMS2
571	PHIP
572	C17orf59
573	AAAS
574	PDGFRB
575	TMEM123
576	GPX3
577	ITGA7
578	ZNF76
579	GRN
580	NT5C
581	CITED2
582	ZNF580
583	TMEM47
584	SATB1
585	USB1
586	XBP1
587	ACTG2
588	GAB2
589	C12orf44
590	DNAJB5
591	hsa-mir-1199
592	NUMBL
593	SMCR8
594	CDC42EP4
595	SLC38A1
596	WDR27
597	TMEM86A
598	C1orf213
599	SPEG
600	DBNL
601	TMEM204
602	SPRY1
603	METRNL
604	CYBRD1
605	BGN
606	PDP1
607	GNRH1
608	PDF
609	SPG7
610	PPIL1
611	GTPBP2
612	VCL
613	GDAP1
614	ADAMTSL4
615	GNA13
616	GBA2
617	PDIA4
618	MEF2D
619	AOC2
620	ESAM
621	IGFBP4
622	LMAN2
623	HSF4
624	PMAIP1
625	ETS2
626	TRMT10C
627	TMOD1
628	DOLK
629	GTF3A
630	C20orf112
631	DBN1
632	CLPB
633	SOD3
634	DDX39A
635	PRNP
636	BCL9L
637	MYL2
638	DHX34
639	RNF146
640	PSMA4
641	ELOVL5
642	C7orf43
643	PELI1
644	COL1A2
645	BCORL1
646	EBF4
647	DCUN1D4
648	MTF2
649	COL3A1
650	ULK1
651	MFNG
652	ACTA1
653	PLVAP
654	FAM168B
655	SLC39A10
656	MLLT4
657	USP36
658	IFNGR1
659	SMARCD2
660	EVA1B
661	PTRH2
662	NAGLU
663	UTRN
664	HSD17B10
665	DHX37
666	EPHA2
667	COL14A1
668	RBM12B
669	BCL3
670	FKBP10
671	C22orf46
672	THOC6
673	GRK5
674	TCF4
675	MDK
676	TM9SF2
677	ALDH1L2
678	ATP2A2
679	NAA25
680	APOD
681	ITGA10
682	NHLRC3
683	AIP
684	FAM129B
685	CDC42EP3
686	CTTN
687	ELL3
688	TRIM25
689	GNG11
690	RASSF1
691	FURIN
692	SLC16A14
693	TIMELESS
694	C19orf68
695	CYR61
696	C3orf35
697	PVR
698	SLC43A3
699	MEIS1
700	RGL2
701	ANO8
702	SMG9
703	FKBPL
704	TBC1D8
705	TPCN1
706	PRPF40B
707	TSPAN7
708	KHSRP
709	NES
710	MKNK2
711	KIAA1109
712	MVP
713	TRMU
714	PLXNB1
715	TIMP2
716	MYPOP
717	MYSM1
718	MSH2
719	GSE1
720	NFKBIZ
721	GPR124
722	F10
723	AOX1
724	ABTB1
725	ERRFI1
726	ADHFE1
727	ASB2
728	GIMAP5
729	TMEM2
730	C11orf84
731	MFSD1
732	B3GNT5
733	ZBTB7B
734	ZNF503
735	MCL1
736	FMO4
737	RAP2A
738	COL16A1
739	DPT
740	UPP1
741	C10orf10
742	CASQ2
743	ECE2
744	ZNF784
745	TNIP1
746	MARCH5
747	RASSF4
748	NUDT18
749	KTN1
750	CH25H
751	RBM25
752	PAK1IP1
753	MTSS1L
754	DARC
755	CBX6
756	FAM160B2
757	FBXL3
758	SAMD4A
759	SORBS2
760	PIK3IP1
761	PPM1F
762	HCLS1
763	PLEKHF1
764	PTPRC
765	GLIS2
766	HIVEP2
767	TRMT6
768	HIST1H2AE
769	LYL1
770	AGFG2
771	MRPS34
772	TMEM106C
773	RGS5
774	LGALS3BP
775	SLC30A1
776	ADAMTS15
777	NEXN
778	TRAPPC6A
779	MAFK
780	ZBTB1
781	TPPP3
782	VAMP2
783	PPP1R16B
784	DLAT
785	PPAN
786	BCS1L
787	MADD
788	SLC6A9
789	ACVR1B
790	AGPAT9
791	N4BP2L2
792	PCOLCE
793	DNAJB9
794	USP35
795	RRAGA
796	FAM43A
797	HAS1
798	THBD
799	PHF13
800	SHFM1
801	GZF1
802	NR1D1
803	EFHD1
804	LPCAT4
805	HIST1H1D
806	HDAC7
807	GPT
808	ITGB2
809	GPC1
810	CCNL2
811	FAM107A
812	PYGO2
813	SNRPB
814	ACKR3
815	ACOX2
816	ABHD5
817	SYTL3
818	PLCD1
819	N4BP2L1
820	SQSTM1
821	PLAU
822	PIGT
823	MON2
824	ARHGAP10
825	NDUFA1
826	PTGS2
827	ID3
828	TNFRSF12A
829	ANKRD13D
830	NLGN2
831	RIPK4
832	UBAP1L
833	MATN2
834	CCDC115
835	PLEC
836	TGIF1
837	RAB3A
838	PNPLA2
839	VASN
840	JMJD1C
841	VAPA
842	URB2
843	OLFML1
844	ZMPSTE24
845	PLEKHB1
846	NOL3
847	VIM
848	NPDC1
849	EEF2
850	TSPAN5
851	DCHS1
852	ECHS1
853	MAFB
854	SKIL
855	CKAP4
856	GADD45G
857	MAL2
858	PHF3
859	ORMDL1
860	NFATC4
861	A2M
862	SRGN
863	SEPHS2
864	BZRAP1
865	MINK1
866	KRCC1
867	ADRB2
868	BBC3
869	GPC3
870	RASL12
871	KIF13B
872	KIAA1279
873	NBEAL2
874	CHST3
875	CAB39L
876	TELO2
877	MMP15
878	ATAT1
879	CTIF
880	U2SURP
881	HYOU1
882	ZNF10
883	SELENBP1
884	AVEN
885	MCM7
886	GPD1L
887	IGFBP6
888	PHF15
889	ANGPTL1
890	SHROOM3
891	PLSCR1
892	PGP
893	TLDC2
894	PTDSS1
895	LDLRAD2
896	FADS3
897	SLIT3
898	SH2D3C
899	SLC22A17
900	IL17D
901	ADCY4
902	EXOSC5
903	ARL4D
904	VEGFA
905	WDR1
906	LAMA3
907	PPP1R12A
908	NIPSNAP1
909	COL6A3
910	NRSN2
911	PAM
912	SEMA3F
913	NDRG1
914	TAZ
915	CD164
916	CUTC
917	TP53I3
918	TP53INP2
919	PEA15
920	LZTS2
921	RELT
922	RCOR3
923	LDB2
924	EMC10
925	ARRDC4
926	ARL6IP6
927	TMCO6
928	ITPRIP
929	ALDOA
930	TIAM2
931	LENG8
932	CALD1
933	TTYH3
934	PPM1A
935	TNS1
936	ELF1
937	FBXO32
938	TMEM219
939	C11orf68
940	KLF11
941	ANKMY2
942	EP300
943	YPEL5
944	LGALS1
945	SMCHD1
946	PYCARD
947	ETS1
948	FRY
949	PIK3R3
950	RGMA
951	ABL1
952	FLOT2
953	EIF2S1
954	TRMT1
955	HERPUD1
956	RERE
957	CCDC28A
958	CHPF
959	PXMP2
960	SLC20A1
961	FLNA
962	HEBP2
963	SNAI2
964	AKAP2
965	ZNF787
966	ZDHHC9
967	FMNL2
968	TNFRSF14
969	IMPDH2
970	JUND
971	FAM53C
972	AKAP12
973	BMP2
974	RARRES3
975	CLUH
976	CHD1
977	TYK2
978	INHBB
979	BBS9
980	TRAM2
981	RGS1
982	PARD3B
983	KLHL17
984	THOP1
985	MYCBP2
986	VASH1
987	GDF15
988	CPXM2
989	RAB20
990	COPRS
991	LOX
992	TMEM81
993	AP1G2
994	CHTF18
995	C6orf106
996	IGFBP5
997	ZBTB4
998	SDF2L1
999	CDC42SE1
1000	OSGEPL1
1001	SMIM10
1002	CLIP3
1003	EHD1
1004	C19orf43
1005	CCRL2
1006	CDH13
1007	SMG8
1008	PIAS3
1009	MNT
1010	OSGIN2
1011	SLCO4A1
1012	PHYHIP
1013	ZNF224
1014	ENOSF1
1015	SFRP1
1016	NPEPL1
1017	CDKN1A
1018	CD248
1019	SESN3
1020	MAPKAPK3
1021	JUNB
1022	VANGL2
1023	PI16
1024	IRAK3
1025	RAB32
1026	SGSM2
1027	UBL4A
1028	USP31
1029	LZTR1
1030	LZTS3
1031	FAM212A
1032	SEMA4B
1033	SMPD3
1034	SMAD1
1035	CNN1
1036	RAPGEFL1
1037	SDC4
1038	FAM180B
1039	ANO6
1040	H2AFX
1041	SELM
1042	CLN5
1043	LDOC1L
1044	TRAK2
1045	FAT1
1046	ST6GALNAC4
1047	MYOCD
1048	CCDC71
1049	SIDT2
1050	ZSWIM6
1051	MAZ
1052	RND3
1053	EFS
1054	DDRGK1
1055	MZF1
1056	TSC22D4
1057	ARHGDIA
1058	DNPH1
1059	NOVA1
1060	CDKN2AIP
1061	MAP1A
1062	TCP11L2
1063	CMIP
1064	DCAF17
1065	DCN
1066	FRAT2
1067	TMEM14A
1068	TRAFD1
1069	LYAR
1070	MEF2C
1071	TCIRG1
1072	MTR
1073	CLEC11A
1074	GNAI3
1075	C10orf54
1076	METAP1D
1077	DNAJA4
1078	AMOTL1
1079	PPP1R18
1080	HOXA4
1081	HCFC2
1082	ING4
1083	VPRBP
1084	MAP4K4
1085	FAM76B
1086	RALGDS
1087	ZNF219
1088	IGSF8
1089	COMMD8
1090	NUDT8
1091	DPH2
1092	NAPEPLD
1093	CLU
1094	ATP13A2
1095	ZBTB9
1096	RBBP6
1097	TNFSF13
1098	OXCT1
1099	ACIN1
1100	PTPRF
1101	ATP6V0E1
1102	CCNH
1103	PLAGL1
1104	TMEM208
1105	CTPS1
1106	ABHD3
1107	MFSD12
1108	HERC5
1109	DYRK3
1110	TMEM63A
1111	DIAPH2
1112	PYGM
1113	EXTL3
1114	C17orf80
1115	PATZ1
1116	NMT1
1117	ADRM1
1118	ZDHHC17
1119	ZHX2
1120	CORO2B
1121	CLK4
1122	ERG
1123	CNPY3
1124	ARHGEF2
1125	SLC1A3
1126	TICAM1
1127	TUSC3
1128	CCDC9
1129	ZNF512B
1130	PPL
1131	C10orf2
1132	SBNO2
1133	RPRD2
1134	ME1
1135	PDGFRA
1136	MSL2
1137	MAP2K3
1138	MAF1
1139	STK35
1140	PLXND1
1141	CTSK
1142	CLEC14A
1143	TNNC1
1144	FIBIN
1145	STX10
1146	TIMM13
1147	PLP1
1148	UCKL1
1149	FXYD7
1150	E2F4
1151	LANCL1
1152	MYH9
1153	ZNF217
1154	SLC38A10
1155	NDUFB9
1156	SEC11C
1157	GPC4
1158	CNST
1159	CCDC167
1160	HDAC11
1161	MAF
1162	NCK2
1163	RAB40C
1164	FCGRT
1165	MAML2
1166	PNKP
1167	EME2
1168	ZBTB17
1169	C1orf21
1170	HOXA5
1171	LOXL1
1172	SETD1B
1173	GIMAP7
1174	GAREM
1175	C9orf72
1176	GOPC
1177	FAM65A
1178	FLOT1
1179	TMEM54
1180	OMD
1181	RNPEPL1
1182	SCFD2
1183	C1orf35
1184	MBOAT2
1185	LDHD
1186	ADM
1187	CFD
1188	MAP3K10
1189	GBE1
1190	MRVI1
1191	RNF169
1192	PARP2
1193	EHD4
1194	NEURL1B
1195	S100A6
1196	ABHD14B
1197	ZMYND11
1198	SERPING1
1199	CFL2
1200	YDJC
1201	DACT1
1202	ST3GAL5
1203	ARL15
1204	DUSP16
1205	SH3BP4
1206	C11orf96
1207	TRIM33
1208	HTRA1
1209	EML4
1210	NLRX1
1211	C3orf52
1212	EGFR
1213	ATP9A
1214	UCHL1
1215	NYNRIN
1216	IQCJ-SCHIP1
1217	SPG20
1218	ABI3BP
1219	SEC31B
1220	OSBPL1A
1221	SLC25A28
1222	SHB
1223	TEAD3
1224	C1orf198
1225	HSPA13
1226	MUS81
1227	CEP57
1228	MAP1B
1229	EPHX1
1230	CLEC2B
1231	TRAF1
1232	GADD45GIP1
1233	CASKIN2
1234	EBF1
1235	CTSA
1236	STC1
1237	LPAR5
1238	HSPH1
1239	CRTC2
1240	ENDOG
1241	TFAP4
1242	RBMS3
1243	MAP3K1
1244	PKD2
1245	SLC25A27
1246	ELP2
1247	ANKRD50
1248	HMBS
1249	GPSM3
1250	CHAC1
1251	PRDM1
1252	GSTA4
1253	CALHM2
1254	MAGED2
1255	IQSEC1
1256	GCC1
1257	LRRC32
1258	TYMP
1259	HEY1
1260	MEN1
1261	DENND3
1262	DOC2A
1263	PXDC1
1264	MFGE8
1265	PSMF1
1266	USP2
1267	SPRYD3
1268	NPC2
1269	GLTSCR1L
1270	KLHDC8B
1271	ZNF337
1272	RNF19A
1273	ARFRP1
1274	FHOD3
1275	CYTIP
1276	FUOM
1277	MPZL2
1278	LRRC20
1279	ARHGAP30
1280	LRSAM1
1281	ENTHD2
1282	NR3C2
1283	GPRC5C
1284	MBNL1
1285	FOXF1
1286	UBA7
1287	ALG3
1288	MAOA
1289	SMARCD3
1290	CCNT2
1291	NTN1
1292	C8orf82
1293	LAMA2
1294	CCDC93
1295	MCM2
1296	MYO15B
1297	FBXO2
1298	AGPAT4
1299	RGS16
1300	DSP
1301	RBM24
1302	SETD5
1303	PPM1D
1304	C11orf89
1305	ADM5
1306	SETD6
1307	ARRDC2
1308	DECR1
1309	PCYT2
1310	STC2
1311	ANXA1
1312	RBP4
1313	DLGAP4
1314	CTGF
1315	BAIAP2
1316	GIMAP4
1317	MESDC1
1318	ATP1A1
1319	HSPA4
1320	YWHAH
1321	PPM1M
1322	CRELD1
1323	GDF10
1324	C2CD5
1325	PDE5A
1326	SESTD1
1327	AGFG1
1328	FCHO2
1329	GFPT2
1330	DNASE1L2
1331	HEG1
1332	C6orf1
1333	KIAA1147
1334	ARHGAP29
1335	RRP12
1336	SCN4B
1337	ZNF646
1338	CSTF2T
1339	FSTL1
1340	ZNF703
1341	MYO9B
1342	PRR12
1343	PGM1
1344	CUL7
1345	PPIC
1346	PDK3
1347	PIDD
1348	ANGPTL2
1349	RAB15
1350	KIAA0947
1351	PDGFC
1352	TRIO
1353	SETBP1
1354	PRKAG2
1355	TMED7
1356	MN1
1357	FOLR2
1358	CDKN2D
1359	CD53
1360	CANT1
1361	FAM20C
1362	DGAT1
1363	CORO6
1364	PPM1G
1365	EXOSC4
1366	TRIM8
1367	THBS1
1368	FOXRED1
1369	TESK1
1370	PODN
1371	LYPD3
1372	ACTC1
1373	ICAM2
1374	TRMT61A
1375	G0S2
1376	FPGS
1377	MSRB1
1378	SPRY2
1379	CD34
1380	ETNK2
1381	GART
1382	GNAZ
1383	FNDC1
1384	LMO2
1385	RGAG4
1386	HNMT
1387	HSPG2
1388	RRAGD
1389	IMP3
1390	GSTP1
1391	MYLIP
1392	TMEM79
1393	BAD
1394	GNAS
1395	SEC14L2
1396	PTN
1397	DUS1L
1398	MEGF8
1399	YTHDC1
1400	ABCA7
1401	GEM
1402	SSFA2
1403	GPSM1
1404	LNX1
1405	PARS2
1406	PYCR1
1407	MFSD8
1408	STX16-NPEPL1
1409	LRRC39
1410	LDHB
1411	MTCH2
1412	SPINT2
1413	DYRK2
1414	CLSTN1
1415	QRICH2
1416	RUSC2
1417	PCK2
1418	SPTBN1
1419	RNF38
1420	CCDC39
1421	THY1
1422	LONRF1
1423	SIAH2
1424	ERLIN1
1425	PGRMC1
1426	UBTD1
1427	MXD4
1428	EXOC7
1429	PPP1R14A
1430	SNTA1
1431	PGM2
1432	JMJD4
1433	FAM13A
1434	ZNF862
1435	CKB
1436	SP110
1437	DOK4
1438	CREBL2
1439	TMEM30A
1440	SH3D21
1441	PDLIM7
1442	ST5
1443	IGSF9B
1444	RAD23A
1445	SLC20A2
1446	CLDN5
1447	CDC37L1
1448	MAP3K3
1449	DHPS
1450	IFRD2
1451	RPLP2
1452	B3GNT2
1453	FTSJ2
1454	PLEKHO2
1455	SCAMP2
1456	RABAC1
1457	CCDC85C
1458	KSR1
1459	TPD52
1460	MAP3K6
1461	TCF19
1462	SELPLG
1463	C12orf79
1464	GBGT1
1465	ASAP3
1466	CCDC71L
1467	VAMP8
1468	TMEM240
1469	USP11
1470	FBXL19
1471	SNRPA
1472	MAN1B1
1473	IFNGR2
1474	ANGEL1
1475	LETMD1
1476	RBPMS
1477	DMXL2
1478	FZD4
1479	LATS2
1480	EFHD2
1481	COL4A2
1482	BACH1
1483	FXYD5
1484	CDK6
1485	ZC3H4
1486	LSMEM1
1487	ATF7IP
1488	ALYREF
1489	FAM219B
1490	GMNN
1491	C12orf75
1492	THOC1
1493	TBC1D14
1494	HSD11B1
1495	PRRC2B
1496	IGF1R
1497	ATN1
1498	MAN2A1
1499	AGL
1500	ZSWIM8
1501	MYL1
1502	ADCK1
1503	TWISTNB
1504	LARP6
1505	P4HB
1506	JAG1
1507	MARCH1
1508	RBM38
1509	TRAF3IP3
1510	MTMR3
1511	DLC1
1512	CELSR2
1513	COL8A2
1514	MED13L
1515	HIC1
1516	FBXW7
1517	LY96
1518	C7orf60
1519	HSPB8
1520	STS
1521	GPD1
1522	DMPK
1523	GPR153
1524	EDEM3
1525	GCHFR
1526	MLYCD
1527	NISCH
1528	ENG
1529	HEY2
1530	MYCT1
1531	MFSD3
1532	PTP4A3
1533	SH3PXD2B
1534	IKZF1
1535	CD4
1536	DBI
1537	ZNF629
1538	CNN3
1539	SOX17
1540	NDRG2
1541	DDX39B
1542	FUZ
1543	CAPN3
1544	CHST7
1545	SLC37A4
1546	SPNS2
1547	RAPGEF2
1548	FXR1
1549	EFNB2
1550	PXN
1551	KIAA1522
1552	DUSP10
1553	MTMR4
1554	MAP4
1555	FAM168A
1556	PPM1J
1557	ITGA5
1558	SLC29A1
1559	INPP4B
1560	ASPN
1561	MTG1
1562	BRPF3
1563	SMARCC2
1564	PFN2
1565	UBTF
1566	FERMT2
1567	RB1CC1
1568	TMEM8B
1569	NFE2L2
1570	WDR6
1571	ENO1
1572	COL7A1
1573	CST3
1574	STK17A
1575	ATP5I
1576	JRKL
1577	ADD3
1578	RAB7A
1579	TLE2
1580	SOX9
1581	ZACN
1582	NXPH3
1583	FBLN2
1584	DES
1585	FBLN5
1586	PHPT1
1587	FUCA1
1588	C2orf44
1589	RASD1
1590	NCLN
1591	RELL1
1592	SGCD
1593	PML
1594	IL11RA
1595	DNAL4
1596	C14orf80
1597	PRR7
1598	LAMTOR2
1599	CALML5
1600	TUT1
1601	SLC9A9
1602	SPHK2
1603	VSIG4
1604	RIN1
1605	ARL4C
1606	ZUFSP
1607	CRTAP
1608	PAN2
1609	SH3RF3
1610	NFKBIA
1611	PTPRE
1612	B9D1
1613	PPIG
1614	SORBS1
1615	CSF1R
1616	TMEM218
1617	TSEN54
1618	ZBTB47
1619	VIT
1620	NOC3L
1621	PNMA1
1622	TESK2
1623	DDAH2
1624	PPAP2B
1625	ZNF436
1626	RAMP1
1627	JAG2
1628	CCDC130
1629	CCDC107
1630	PDE7A
1631	ZZEF1
1632	CEP95
1633	KIAA1462
1634	MMP14
1635	BPGM
1636	COPZ2
1637	ARHGAP9
1638	ZNF581
1639	RAB3IL1
1640	BTG3
1641	ACOT7
1642	PIP4K2C
1643	MYL6
1644	KIAA0408
1645	GABRE
1646	CIC
1647	MAMLD1
1648	ATP13A3
1649	LRRC14
1650	PMM1
1651	VIPR1
1652	MYOC
1653	C1R
1654	SLC1A4
1655	F13A1
1656	CD81
1657	RABGGTA
1658	TACSTD2
1659	C19orf26
1660	SH3BGRL3
1661	GSN
1662	AGPAT2
1663	POLR2A
1664	TFCP2
1665	RIMS3
1666	TMTC1
1667	NECAB3
1668	DKK3
1669	MEOX2
1670	COL5A3
1671	RCAN2
1672	KRT7
1673	HIPK3
1674	QKI
1675	USP15
1676	ST6GAL1
1677	CPEB4
1678	ZEB1
1679	AC069547.1
1680	AGPAT1
1681	HOXA9
1682	CABIN1
1683	PRMT7
1684	NCKAP1L
1685	BZW2
1686	UCHL3
1687	IRF2BP1
1688	SLC12A6
1689	ABHD8
1690	C19orf48
1691	ST14
1692	LYPLAL1
1693	ZBED5
1694	ISOC1
1695	CSNK2B
1696	FN3K
1697	C1QTNF1
1698	NDNL2
1699	PRDX4
1700	PRR26
1701	HDAC6
1702	PLS3
1703	ENO2
1704	SNN
1705	LIF
1706	ARHGEF12
1707	KPTN
1708	UBE2G1
1709	MGST1
1710	SLC31A2
1711	PTPRS
1712	AEN
1713	HIST1H4H
1714	DUSP15
1715	ECM1
1716	SFRP4
1717	HSPB7
1718	LAMB1
1719	VASP
1720	SLC7A1
1721	SPSB1
1722	MRM1
1723	MGP
1724	IL1R1
1725	PRDX5
1726	IGFBP7
1727	PRKCH
1728	TAOK2
1729	ULK3
1730	TSPYL4
1731	WAC
1732	COBLL1
1733	PTPRU
1734	CREB5
1735	PDRG1
1736	ANKRD35
1737	PARD6A
1738	IFFO2
1739	PIK3R1
1740	SLC7A8
1741	LSM4
1742	FOXC1
1743	SLC26A6
1744	SARS
1745	FHOD1
1746	PRPF6
1747	PLK2
1748	PDE4A
1749	FAM167B
1750	PLXNA2
1751	MRPS12
1752	BCL6
1753	HEXA
1754	KDM1B
1755	TCN2
1756	RARRES2
1757	PEX11G
1758	PDK4
1759	C19orf71
1760	IGFBP2
1761	LGR4
1762	ATRN
1763	ZNF579
1764	RTN2
1765	RUNX1
1766	SHANK3
1767	CACNA2D1
1768	NR2C2AP
1769	EMP3
1770	FLI1
1771	KIAA0100
1772	KANSL1L
1773	ZBTB10
1774	RAF1
1775	NUDT5
1776	LMNA
1777	APMAP
1778	EPHB3
1779	TNRC6C
1780	TNFSF12
1781	DUSP7
1782	TMED9
1783	HSD17B11
1784	IL16
1785	SLC40A1
1786	SYNE1
1787	DLL4
1788	KCTD2
1789	PELI2
1790	EPC1
1791	LMNB2
1792	CXCL12
1793	CLIP4
1794	FAP
1795	TTC13
1796	CRYAB
1797	S1PR2
1798	P4HA2
1799	CYP27A1
1800	PDE1B
1801	SNX9
1802	FKBP2
1803	PARM1
1804	CREG1
1805	ANK2
1806	PLXNA1
1807	MAMDC2
1808	PSAP
1809	CRY2
1810	PFKFB2
1811	PEAR1
1812	RNF41
1813	TGFB1I1
1814	B4GALT2
1815	THEMIS2
1816	EDA2R
1817	TSPAN13
1818	IFITM1
1819	SF3A2
1820	C1S
1821	CAV1
1822	S100A9
1823	CBLB
1824	CALM1
1825	JMY
1826	BCKDHA
1827	BMP1
1828	MTUS1
1829	SH2B2
1830	PJA1
1831	ZNF423
1832	MYO1B
1833	NFKB1
1834	NT5DC2
1835	UCN
1836	MAU2
1837	PITPNM1
1838	ACP2
1839	CCDC19
1840	GLS
1841	SEPT5
1842	RANBP9
1843	SCNN1G
1844	UBL3
1845	SDHAF1
1846	HMOX1
1847	SCML1
1848	INSIG1
1849	COX8A
1850	IER3
1851	PLCH2
1852	WASF3
1853	KHNYN
1854	GLG1
1855	CHUK
1856	MOB2
1857	LRRC8A
1858	CELF2
1859	DHRS12
1860	KCTD11
1861	STOML1
1862	TSC22D2
1863	IL8
1864	MAN2A2
1865	NUP210
1866	ABHD14A
1867	FHL5
1868	TOMM5
1869	CLIP2
1870	RAC3
1871	PSME4
1872	INPP5D
1873	LMO7
1874	SPSB3
1875	B3GNT1
1876	MFSD7
1877	DRD4
1878	SNAI1
1879	TMEM25
1880	ANO1
1881	TRANK1
1882	KCTD12
1883	SRPX
1884	UQCC2
1885	TENC1
1886	FLYWCH2
1887	TSPAN18
1888	PLIN1
1889	PLEKHO1
1890	DIRC2
1891	SLC17A7
1892	KRT10
1893	CCDC3
1894	ARHGAP31
1895	USP53
1896	DCAKD
1897	GPS1
1898	G6PC3
1899	SF3B1
1900	CBR4
1901	DDAH1
1902	TRO
1903	ATP11A
1904	STX11
1905	MUT
1906	AGO2
1907	AHCYL2
1908	GLYAT
1909	TMUB1
1910	ECSCR
1911	ELMSAN1
1912	SIX5
1913	PIK3R5
1914	PACSIN3
1915	FAM107B
1916	HNRNPM
1917	PDE4B
1918	C1QB
1919	LFNG
1920	MRPL27
1921	ITIH3
1922	CYBA
1923	ZNF740
1924	TRIM29
1925	PRSS16
1926	TEX30
1927	CNNM3
1928	GRAMD1A
1929	FAM89A
1930	DCXR
1931	RAC2
1932	PXDN
1933	ATP13A1
1934	CPNE1
1935	PRPF19
1936	HABP4
1937	TRIM27
1938	TNNC2
1939	KIFC2
1940	KLF3
1941	MAD2L1BP
1942	PDLIM3
1943	CTD-2369P2.12
1944	KIAA0040
1945	ABLIM1
1946	MSX1
1947	PTPN21
1948	GLIPR1
1949	CDR1
1950	TMEM147
1951	PINK1
1952	CRIM1
1953	NGFRAP1
1954	EGFL7
1955	AATK
1956	EPHB6
1957	C6orf62
1958	TJP2
1959	DVL3
1960	CD63
1961	OTUD6B
1962	OAF
1963	SMOX
1964	SH3KBP1
1965	HIRA
1966	RECK
1967	ARHGEF37
1968	RECQL4
1969	ABAT
1970	PFKFB3
1971	EDF1
1972	GBAS
1973	EIF4E3
1974	PHLDA2
1975	WIPI1
1976	BRD2
1977	KDELR1
1978	PGAP3
1979	DYSF
1980	CHKB
1981	TMEM173
1982	ZCWPW1
1983	PRKD2
1984	PRMT10
1985	LAMC1
1986	EIF4G3
1987	MTFP1
1988	POMT1
1989	GLTPD1
1990	CCDC51
1991	SRPX2
1992	CPD
1993	CEP170B
1994	CAP2
1995	MFAP3
1996	NFIX
1997	MFAP1
1998	SLC25A22
1999	NAPB
[truncated: 8,009 more rows]

## Sheet: IR-TE
rank	hub
1	THRA
2	CCND3
3	PCOLCE
4	SPIDR
5	WDR33
6	DDX5
7	SBNO2
8	GSN
9	FBLN2
10	SRSF7
11	CXCL12
12	SRSF1
13	LSP1
14	FXYD1
15	CD2BP2
16	SMTN
17	SRCAP
18	CLK1
19	COL1A1
20	FBXO32
21	SPTAN1
22	SPTBN1
23	SLC3A2
24	PPP1R14A
25	TSC22D3
26	MKNK2
27	RER1
28	SUV420H1
29	CRTC1
30	LARP6
31	CREB5
32	CPSF6
33	CTSF
34	BCL6
35	CALM1
36	MEF2D
37	MECP2
38	CD47
39	RARA
40	CIRBP
41	SH3GLB1
42	PPP1R16A
43	CAV1
44	SLC7A8
45	ACOT8
46	SLC19A1
47	DCLK1
48	AKAP8L
49	NR4A2
50	RNASEH2C
51	ZNF800
52	DDRGK1
53	PDLIM3
54	PMP22
55	CSTF3
56	IL17D
57	PCGF5
58	BRE
59	QTRT1
60	UBTF
61	LMF1
62	C6orf48
63	SAT1
64	SLIT3
65	CELF2
66	WWP2
67	MOB2
68	UGP2
69	ATP2B4
70	AKAP12
71	MFGE8
72	SLC25A25
73	OXA1L
74	TMEM165
75	EPC2
76	PPM1A
77	CENPV
78	MBP
79	PSAP
80	COL6A1
81	MKKS
82	IL18BP
83	SYNGR1
84	COL1A2
85	KIF22
86	HNRNPM
87	LAMB1
88	ALS2
89	SH3D19
90	DIAPH2
91	FAM120B
92	FOSL2
93	FAM160A2
94	ADAMTS9
95	PKIG
96	CRYAB
97	ATRN
98	SEPT6
99	ADAMTS2
100	DDX17
101	AGRN
102	DDAH1
103	DHX15
104	COL6A3
105	PATZ1
106	EPAS1
107	SRA1
108	CCDC50
109	FAM69B
110	MCM9
111	SLC44A1
112	PHPT1
113	KCNMA1
114	OGT
115	FBXW5
116	PCNX
117	SYNPO2
118	MTUS1
119	PRKAG2
120	VCL
121	RELA
122	BUB3
123	PPP2R4
124	RBM26
125	USP2
126	DDX39A
127	MYH11
128	PPP3CB
129	PLXDC2
130	ZBTB1
131	BCCIP
132	MAX
133	HDAC9
134	ASPH
135	AUP1
136	MXRA8
137	TBRG4
138	ATP2A2
139	IP6K2
140	SELENBP1
141	SLC2A4RG
142	UCK2
143	PRDM2
144	RXRA
145	PSMB4
146	GLS
147	DPYSL3
148	TNKS1BP1
149	ANKRD37
150	CLEC2B
151	DUSP23
152	GPATCH2
153	MMP19
154	CYTH1
155	XPR1
156	IRF2BP2
157	NEDD4L
158	SLC29A1
159	PCED1A
160	CD44
161	C1S
162	SESN1
163	ECM1
164	KRT7
165	TXNDC5
166	PTK2B
167	IVNS1ABP
168	MFSD10
169	MYH14
170	MAP3K8
171	SLC20A2
172	CLK4
173	HYI
174	CALCOCO1
175	COASY
176	CLSTN3
177	PSMB10
178	CABIN1
179	TEX10
180	IFRD2
181	AKT1S1
182	THAP4
183	DYSF
184	MAPRE2
185	FBXO3
186	ABLIM1
187	TACC1
188	TCEA2
189	CALD1
190	ABR
191	POSTN
192	SLC39A10
193	SLC38A10
194	MSL1
195	GSTT1
196	CDS2
197	HMHA1
198	MTR
199	AEBP1
200	TUT1
201	ITGAE
202	ARRDC2
203	FKBP10
204	ADNP
205	RASSF4
206	LPCAT4
207	MKLN1
208	ARHGEF10L
209	S100A16
210	ANXA1
211	SESTD1
212	PLEKHG5
213	TNPO2
214	TYMP
215	TLN2
216	NXPH3
217	MARS
218	HYAL2
219	C1orf123
220	ATP6V1C1
221	RECK
222	ICAM3
223	SPARC
224	TMEM201
225	DMD
226	HCFC1R1
227	COL18A1
228	TBX2
229	DNM2
230	NDRG1
231	VWA5A
232	PLS3
233	GDI1
234	FN3K
235	C1QTNF3
236	INO80E
237	KLF6
238	TJP2
239	TNC
240	CASC3
241	HNRNPH3
242	DPM2
243	CABLES1
244	AGPAT3
245	TSC22D2
246	SCPEP1
247	HNRNPA2B1
248	AKT1
249	OS9
250	BIN1
251	HCLS1
252	SMG6
253	C7orf41
254	TPM2
255	SMARCD3
256	PSMD11
257	ZNF580
258	NELFE
259	NFIC
260	CHTOP
261	ADAMTS1
262	PPP1R7
263	MAPKAPK3
264	IGF1
265	SLC12A9
266	RGS3
267	UAP1
268	CNNM3
269	IGFBP3
270	THBS1
271	RPTOR
272	PIK3R1
273	CALML4
274	XBP1
275	NMT1
276	P4HTM
277	NPDC1
278	SLCO4A1
279	NDUFAF6
280	CDK16
281	RAB30
282	PDLIM7
283	RNF103
284	ERN1
285	MARCH7
286	PHF19
287	TNFRSF14
288	KHDRBS1
289	UPP1
290	MTCH1
291	PCDH7
292	PET112
293	LYST
294	SEC24C
295	GSK3B
296	INF2
297	MKL2
298	ABCA6
299	YARS
300	BNIP2
301	TIAL1
302	RABGAP1L
303	MEIS1
304	EHBP1
305	ZBTB47
306	POFUT2
307	FAM219B
308	RBBP6
309	TMEM237
310	BSCL2
311	MSH6
312	MMP28
313	CST3
314	LMNA
315	SORBS2
316	TMUB1
317	CD37
318	MSR1
319	KLF3
320	PPP6C
321	GATM
322	VPRBP
323	PPP1CB
324	HECTD2
325	TCAP
326	PXN
327	ZNF385A
328	UBE2I
329	DTNA
330	SLC22A17
331	MBTPS1
332	QKI
333	STXBP2
334	RTN4
335	KAZALD1
336	GMDS
337	TRAF1
338	DST
339	RFNG
340	HAPLN3
341	RBPMS
342	MXD4
343	EPC1
344	STARD5
345	RASGRF2
346	NOTCH4
347	STARD13
348	ASB1
349	CAMK2D
350	DDB2
351	AGBL5
352	ACAP1
353	ISLR
354	LRRK2
355	ARIH1
356	CBLB
357	DPP7
358	HSF1
359	MARCH6
360	ANKRD9
361	WNT2B
362	CDK5RAP2
363	EGFL7
364	PHF21A
365	JTB
366	CRMP1
367	TNFSF12
368	DNAJA4
369	IFRD1
370	ADHFE1
371	N4BP2L2
372	PDZRN3
373	GTF3A
374	CAPZB
375	DCN
376	RNF41
377	MPZ
378	CDC42SE1
379	PMEPA1
380	WDR86
381	ACSL1
382	RASSF1
383	SAP30L
384	ANKRD10
385	GCHFR
386	NCF4
387	SEPT1
388	ARHGEF19
389	DYRK2
390	HES4
391	PRRC2B
392	ARGLU1
393	CPB1
394	BCAR3
395	ITGA1
396	GLDN
397	SCHIP1
398	IMPDH2
399	RUNX1
400	TBC1D16
401	PFKFB3
402	ABLIM3
403	CD163
404	WDR81
405	SORBS1
406	CHI3L1
407	MTMR10
408	PER1
409	TRIB2
410	PPP2R1B
411	ADARB1
412	STRA13
413	CDC42EP3
414	RILP
415	CELSR2
416	LRRC32
417	DMPK
418	DGAT1
419	RBM33
420	FOSB
421	CYFIP2
422	EHBP1L1
423	SEPT5
424	TXNIP
425	hsa-mir-1199
426	PTGER3
427	CDKN2C
428	ATP6V0B
429	DMXL1
430	HSPB7
431	TP53I3
432	CTNNBIP1
433	CLDND1
434	MAP2
435	HTRA3
436	ARHGEF28
437	THEMIS2
438	SMARCA1
439	CLINT1
440	ANXA6
441	BID
442	NR4A3
443	PEX19
444	RASSF5
445	FAM122B
446	DDX47
447	BAIAP2
448	MYL6B
449	REEP5
450	TRAK1
451	C20orf24
452	FLRT2
453	NCALD
454	CASZ1
455	LENG8
456	DHPS
457	PLCD4
458	VIT
459	PNPLA7
460	TIAM2
461	C8orf82
462	HDLBP
463	CREBZF
464	POR
465	IPO11
466	CFI
467	PNP
468	NAV1
469	SIX5
470	PHF15
471	CFL2
472	ADCY5
473	ARID5A
474	SH3BGRL3
475	ZNF84
476	HSPA14
477	SLCO3A1
478	SH3BGR
479	CLMN
480	SLC38A2
481	CTSA
482	RNF217
483	TGFBI
484	CDKN1C
485	SORL1
486	SPSB3
487	SNX8
488	CRLF1
489	TSC22D4
490	ANKRD13A
491	CALM3
492	N4BP1
493	IFT27
494	RPGR
495	BICD2
496	HLA-DQB1
497	GSTA4
498	CAPN2
499	PNKD
500	UBE2G1
501	NHP2L1
502	RABGGTB
503	VPS26B
504	SH3KBP1
505	WDR54
506	NFATC1
507	HIRIP3
508	TPPP3
509	SGCD
510	RAPGEF1
511	NUDT5
512	LRP1
513	SCARB1
514	RAPGEF5
515	LAMA4
516	SERPINA1
517	CASK
518	FXR1
519	POGK
520	HEMK1
521	ABCB6
522	ABCA5
523	MYO5A
524	MDK
525	PRKACB
526	RHBDD2
527	MPZL2
528	PODXL
529	NLRP1
530	DSP
531	ARHGAP6
532	CLDN15
533	TSTD1
534	KIAA1217
535	STX3
536	PCGF2
537	NOSTRIN
538	SNX13
539	TMEM8B
540	C21orf2
541	PLOD3
542	NFASC
543	TXLNA
544	MB
545	C1QTNF7
546	ADAMTSL4
547	RAB2A
548	C7orf55-LUC7L2
549	RAI2
550	NXF1
551	SARS
552	TSPYL2
553	PLSCR1
554	ZBTB16
555	C7orf49
556	CLTC
557	SPNS2
558	MAP4
559	SREBF1
560	NLE1
561	SEMA4D
562	ZNF511
563	ADORA3
564	ANKH
565	HSPH1
566	HSPG2
567	U2SURP
568	ARHGAP24
569	AXIN1
570	ADAMTS12
571	MMP2
572	VSIG4
573	MTERFD3
574	CD7
575	SCRN2
576	HAUS7
577	VAMP1
578	ITIH3
579	DUT
580	PPARG
581	DCAF5
582	PTS
583	KIAA1462
584	LYNX1
585	NSD1
586	AGFG1
587	MYO1B
588	CMIP
589	KAT8
590	GBP2
591	ACVR2A
592	TMEM2
593	MBNL1
594	TYW3
595	PSMA3
596	NPTN
597	APRT
598	GLA
599	TMEM123
600	MED23
601	PALLD
602	VAPB
603	HMCES
604	SAP18
605	PLCD1
606	STX4
607	TMCC1
608	LGALS8
609	SLC9A9
610	KTN1
611	MZF1
612	ARMCX4
613	DCP1B
614	TMEM184B
615	ATP5B
616	DCXR
617	RASIP1
618	MRPS34
619	ITGA7
620	P4HB
621	INTS3
622	MFSD12
623	COL3A1
624	DAPK3
625	ARHGEF40
626	TPRG1
627	STIM2
628	LIPE
629	PTGS1
630	ING3
631	SPON2
632	DNMT3A
633	PHACTR3
634	GADD45B
635	CFD
636	ZEB2
637	WWC3
638	ZNF518B
639	DENND1A
640	PPM1M
641	IFI27L2
642	PDLIM2
643	INPP4B
644	RIN3
645	SLC25A46
646	POLR3E
647	CDK18
648	ITGB4
649	CHN1
650	CWC15
651	FAM13A
652	PIH1D1
653	SIK3
654	CBLL1
655	EIF2B5
656	DBNDD2
657	ASXL2
658	UBXN1
659	GPRIN2
660	AKAP8
661	MGAT1
662	WHSC1L1
663	EPHA1
664	AOX1
665	OSGEPL1
666	SEMA6A
667	DAAM1
668	ACADVL
669	KIAA1199
670	FKBP2
671	TRO
672	C3orf52
673	RORA
674	ANAPC2
675	SRF
676	BHLHE40
677	GUK1
678	TNNT3
679	N4BP2L1
680	CHD9
681	LPHN2
682	IL1R2
683	PRPF38B
684	ASAP2
685	SLC35A2
686	TSEN34
687	KLHL29
688	HNMT
689	PVRL1
690	WIPF1
691	HDAC7
692	RAB18
693	NIN
694	RABGAP1
695	USP25
696	RBM25
697	ACAD8
698	LGI4
699	SCRIB
700	DENND1C
701	MIDN
702	MTA3
703	EIF6
704	DAB2
705	GSPT1
706	FYN
707	GRASP
708	C1QTNF1
709	PTPRB
710	QSOX1
711	CERS3
712	FLNB
713	PRDM1
714	COL27A1
715	NEDD9
716	ACSL3
717	TGM2
718	RSF1
719	ARHGEF3
720	C7orf43
721	BAZ2A
722	CAPN5
723	COQ9
724	PDE8B
725	CEP89
726	TMTC1
727	YPEL5
728	C9orf142
729	COG1
730	FAM188A
731	CAB39L
732	SREBF2
733	ACAP3
734	BICD1
735	ANKRD29
736	IQGAP1
737	FAM120C
738	USP11
739	ABCC5
740	BBC3
741	EPB41L5
742	DNAJB12
743	RBM42
744	KALRN
745	RABGGTA
746	KPNA1
747	LTBP4
748	USP53
749	CPSF3L
750	RRAGD
751	KRT5
752	PTPRE
753	RNPEP
754	SREK1
755	HIPK3
756	PHF14
757	FAM50A
758	NARS
759	AGAP1
760	DBP
761	PPM1G
762	TSC2
763	RCAN2
764	ZNF449
765	ABI3BP
766	SYNM
767	PDE4D
768	FBXW7
769	MCMBP
770	C9orf72
771	CDC25B
772	GPRC5B
773	SLK
774	HGF
775	ZZZ3
776	TRPC4AP
777	UBP1
778	TESK1
779	IGHMBP2
780	ACIN1
781	MTFR1
782	TOLLIP
783	TMEM79
784	SNRNP25
785	FPGS
786	FMNL3
787	NFIA
788	CLN5
789	PEX5
790	UROD
791	PEMT
792	ACSF2
793	PAXBP1
794	SLC52A2
795	DBN1
796	SLC27A3
797	BAG6
798	RGL2
799	UBE2A
800	SDC2
801	PRMT2
802	AFAP1L2
803	SH3GLB2
804	BRD1
805	MYOM2
806	FBXL19
807	SDCBP2
808	CLSTN1
809	PTPN6
810	MRPS25
811	RPRD2
812	EGLN3
813	LAS1L
814	PREX1
815	PCTP
816	KLK11
817	LDLRAD2
818	ZHX3
819	EMCN
820	MRC2
821	EFCAB4A
822	NEXN
823	TRIM47
824	DNAJB11
825	TANC1
826	GPAA1
827	VPS13D
828	ZNF775
829	CCNG2
830	USP38
831	PLTP
832	OXLD1
833	CLDN7
834	DYNC1LI2
835	HSBP1L1
836	FERMT2
837	SLC44A2
838	ESR1
839	CGGBP1
840	LUC7L3
841	MINK1
842	CCDC47
843	ILF3
844	NPNT
845	GPT2
846	SIRT7
847	PRRC2A
848	ITGA5
849	DMAP1
850	LGALS3BP
851	FOXK2
852	ZNF318
853	FAM84A
854	CAPN7
855	MPDZ
856	SLC5A6
857	NIT2
858	ST7
859	CNR1
860	FOS
861	MX2
862	CTNNB1
863	ANXA5
864	DIXDC1
865	RPS6KB2
866	SIPA1
867	CHAMP1
868	PELO
869	ENTHD2
870	SNX24
871	HSPB11
872	ZXDC
873	USB1
874	PFKP
875	WBSCR22
876	WNK2
877	GIGYF2
878	ERCC2
879	MARCH5
880	IQSEC2
881	ARID5B
882	SETDB2
883	CLIP4
884	CADM3
885	NUP188
886	ORAI3
887	EIF4G1
888	UNC45A
889	ARHGAP12
890	MYL6
891	LDLRAD4
892	NFKBIA
893	TMBIM6
894	VPS13B
895	ZFC3H1
896	HEXB
897	LCN2
898	SIL1
899	ULK1
900	PRKG1
901	HOXB6
902	RTN2
903	TIMP2
904	USP16
905	SETX
906	S100A13
907	STON1
908	MITD1
909	ARFGEF1
910	FAM65B
911	KHNYN
912	HIVEP3
913	TGM1
914	NIPAL3
915	ECH1
916	PICK1
917	S100A4
918	LCN10
919	CD164
920	NUP214
921	PFKFB2
922	TNRC6B
923	COG4
924	SUPT5H
925	WIBG
926	MON1A
927	UNC119
928	CNTNAP1
929	CISD3
930	ITGA6
931	TCEB3
932	CDKN1A
933	TRIM29
934	TFG
935	NOL3
936	SLC10A3
937	CHKA
938	COL5A1
939	CRY1
940	EZR
941	FAM49A
942	TMEM126B
943	NDRG4
944	GPR133
945	MALT1
946	PWWP2A
947	HLA-DMB
948	BCAP29
949	ATOH8
950	RUSC1
951	ACAD11
952	CYLD
953	DOCK2
954	TMED5
955	FAIM3
956	RNASEH2B
957	BBS7
958	ADD3
959	COG5
960	LRIF1
961	PDE5A
962	DECR1
963	SYT8
964	P2RX1
965	ARL1
966	SLC1A5
967	ARID1A
968	IL17RE
969	ARHGEF11
970	TIMP1
971	ACAD9
972	HECTD3
973	KLHL36
974	STAT6
975	HLA-DMA
976	FILIP1
977	SNX33
978	MAGED1
979	SH3BP5L
980	GPSM1
981	MBOAT2
982	TNFRSF12A
983	TMEM248
984	GAREM
985	FRYL
986	SLC15A4
987	NRP2
988	USP46
989	WNK1
990	NAB2
991	PNPLA2
992	COL14A1
993	RGS5
994	BCL2L1
995	HLF
996	ACOX2
997	PLEC
998	SH2D3C
999	ARAP1
1000	CD53
1001	FUBP1
1002	MXI1
1003	FHOD1
1004	DERL1
1005	HHATL
1006	SNED1
1007	RELT
1008	IL1RL1
1009	C1orf213
1010	OSBPL1A
1011	PPIG
1012	ALAD
1013	RBM17
1014	CD59
1015	ITIH4
1016	PRPF39
1017	IFI16
1018	HNRNPLL
1019	RIN2
1020	NIPBL
1021	CREBBP
1022	FEZ1
1023	SMIM4
1024	GFER
1025	TMTC2
1026	MYBPC1
1027	CDC42BPA
1028	TRAPPC12
1029	CTTN
1030	HERC3
1031	DGCR8
1032	ALDOA
1033	KIAA1551
1034	PITPNA
1035	NUCB1
1036	RNF146
1037	TMEM110
1038	C16orf58
1039	TFPT
1040	GNAI1
1041	IFT140
1042	AMOTL1
1043	F8
1044	DYNC1H1
1045	FAM132A
1046	FUT11
1047	FGF13
1048	TRADD
1049	AGER
1050	METTL3
1051	ANKRD39
1052	SOX12
1053	IL1R1
1054	DDIT3
1055	NPR2
1056	STK32C
1057	TOM1
1058	MMS19
1059	TSTA3
1060	FAM65C
1061	MAFK
1062	CAPN1
1063	GPT
1064	TP53I13
1065	TRIP10
1066	ZDHHC3
1067	ZNF462
1068	UBN2
1069	DLC1
1070	ARMC8
1071	MCM3AP
1072	LRBA
1073	SRPX
1074	PTPRS
1075	NAV2
1076	ARHGAP17
1077	PMM1
1078	TMEM259
1079	SNAPC2
1080	DNMBP
1081	CLEC10A
1082	ADM
1083	LMAN2
1084	FAM126A
1085	COQ10A
1086	PCDH1
1087	SLC22A23
1088	ZC3H13
1089	ERF
1090	PLD1
1091	ATF3
1092	NBEA
1093	RAP1GAP
1094	RAB11FIP5
1095	TRMT44
1096	PHLDB2
1097	KCNAB1
1098	NAA30
1099	APMAP
1100	ARMC9
1101	PSMF1
1102	VPS39
1103	EMILIN1
1104	KLF13
1105	ARMC7
1106	MBNL3
1107	ARSA
1108	MCOLN1
1109	STK17A
1110	ACD
1111	MTUS2
1112	THNSL2
1113	CNST
1114	IL11RA
1115	FAM73B
1116	PTGDS
1117	PCDH9
1118	FIP1L1
1119	PTP4A3
1120	MTMR11
1121	ARHGEF25
1122	KDM2A
1123	RCCD1
1124	ICAM2
1125	EPB41L3
1126	CDADC1
1127	TCF25
1128	EVL
1129	SHMT2
1130	RBFOX2
1131	ZMAT1
1132	TBX3
1133	MUM1
1134	ITPR1
1135	PRKCH
1136	DHX37
1137	TWIST1
1138	ACOT7
1139	CDC42BPB
1140	EPB41L2
1141	SMCHD1
1142	MACF1
1143	BTBD2
1144	COPZ1
1145	ALOX15B
1146	PRKAR1A
1147	MAN2B1
1148	EPB41L1
1149	PLA2G2A
1150	DLG3
1151	CCDC51
1152	PSD
1153	KCTD3
1154	USP15
1155	UCKL1
1156	VEGFA
1157	SNRNP70
1158	CLPTM1
1159	APEX1
1160	METRN
1161	COL4A5
1162	TBC1D23
1163	UCHL5
1164	STK38L
1165	TNNI2
1166	ABCA8
1167	SHROOM3
1168	TBXAS1
1169	KIAA0430
1170	ITM2B
1171	DENND2D
1172	CDK13
1173	ATG4B
1174	TBCD
1175	EBF4
1176	MYL5
1177	WRB
1178	ARHGEF16
1179	FAR2
1180	C1orf122
1181	MAP6
1182	ZNF185
1183	SLC25A39
1184	PRKAR1B
1185	RNF149
1186	ZNRF1
1187	CDIP1
1188	HIST1H2AC
1189	PQLC1
1190	THAP2
1191	VIPR1
1192	SCML1
1193	SPHK2
1194	ACADM
1195	MRAS
1196	ROBO4
1197	FBXO42
1198	TRIM41
1199	DDX26B
1200	ADIRF
1201	PPFIA3
1202	CCDC109B
1203	CAMTA2
1204	TGFBR2
1205	EGFR
1206	THOC6
1207	KCNH2
1208	MED16
1209	CMC1
1210	MYO1E
1211	ACTN2
1212	SLC2A9
1213	GPAM
1214	HEBP2
1215	GRB7
1216	MYOM1
1217	EGFLAM
1218	NT5DC2
1219	PHLPP1
1220	RTN1
1221	LOXL1
1222	ZFAT
1223	EGLN2
1224	ID1
1225	FMNL2
1226	KIAA0040
1227	ANO8
1228	PIK3IP1
1229	MUC1
1230	MRPS14
1231	SERPINB8
1232	PHLDB1
1233	PAM16
1234	XPO1
1235	TCF12
1236	HOXA3
1237	LZIC
1238	ABCC3
1239	MICAL2
1240	NID2
1241	SMYD3
1242	HUWE1
1243	SLC39A7
1244	TRIM27
1245	SH3D21
1246	RGS1
1247	SSNA1
1248	FRY
1249	ITGB2
1250	IL17RC
1251	WISP2
1252	EPS15L1
1253	PIK3R3
1254	PARP10
1255	ATP5E
1256	PHYHIP
1257	RNASET2
1258	MTA2
1259	MOGS
1260	SGCE
1261	PPP1R18
1262	TBCE
1263	ANAPC5
1264	DGAT2
1265	SPATA20
1266	ECI2
1267	TRA2B
1268	PRPF8
1269	WNT4
1270	HMG20B
1271	UFSP2
1272	TM6SF1
1273	TRIO
1274	GPATCH2L
1275	NCAM1
1276	DOK3
1277	TMEM164
1278	G6PD
1279	ATP13A3
1280	ARRB1
1281	THBS4
1282	ARAP3
1283	ACSS2
1284	MAN1B1
1285	NT5C
1286	ZNF740
1287	BIRC3
1288	ARHGAP10
1289	ARID4B
1290	SLC45A4
1291	KLK1
1292	NEK6
1293	NTM
1294	NPL
1295	SIDT2
1296	MAST4
1297	ANKRD13D
1298	GALNS
1299	GSE1
1300	DNASE1L1
1301	CDH11
1302	AGFG2
1303	MCF2L
1304	PDE2A
1305	CHCHD7
1306	RB1
1307	MRPL22
1308	ELN
1309	TAGLN
1310	RTKN
1311	MYEOV
1312	ARHGEF9
1313	DNAJA2
1314	MDC1
1315	APP
1316	NR2C1
1317	POLR2H
1318	RBM14
1319	USP40
1320	SUPT6H
1321	SLC22A5
1322	MBD6
1323	KANSL1L
1324	MAT2B
1325	TRABD
1326	SH3BP4
1327	CYSTM1
1328	SPATA7
1329	SMAD3
1330	NGLY1
1331	SPTB
1332	ZNF276
1333	B4GALNT1
1334	LTBP1
1335	STK40
1336	INSIG1
1337	FAM20A
1338	BRAP
1339	HERPUD1
1340	CREM
1341	PC
1342	SEC61A1
1343	C1orf198
1344	GLIPR1
1345	DIAPH1
1346	KLHL18
1347	PINK1
1348	ACAA1
1349	ARHGEF2
1350	IL24
1351	SERP1
1352	C1orf52
1353	TRIM25
1354	GPR56
1355	GNAO1
1356	NCKAP1L
1357	TBC1D14
1358	CSK
1359	NFE2L2
1360	HMG20A
1361	PDIA5
1362	EXOC7
1363	SDF4
1364	C17orf70
1365	C16orf52
1366	LONRF1
1367	ADAM15
1368	TMEM25
1369	SYNE2
1370	YBX2
1371	MSI2
1372	FMNL1
1373	RAP1GDS1
1374	FOXM1
1375	MARK1
1376	ROM1
1377	CUX1
1378	CKLF
1379	EIF2S1
1380	BAZ1A
1381	TSC22D1
1382	PFKL
1383	PDE1B
1384	NAA20
1385	BRD8
1386	TMEM100
1387	KCNAB2
1388	ENTPD5
1389	FAT1
1390	WAC
1391	GLYCTK
1392	MYBL1
1393	PCYT2
1394	MAPK3
1395	BRD4
1396	MAP2K5
1397	CD36
1398	GNL1
1399	SACM1L
1400	GPD1
1401	SATB1
1402	SENP3
1403	BCKDK
1404	AURKAIP1
1405	MYL3
1406	AJUBA
1407	DHRS12
1408	DTX1
1409	BIN3
1410	H2AFY
1411	LRRC14
1412	DUOXA2
1413	FBXL6
1414	ANTXR1
1415	SEMA4A
1416	SPATA13
1417	FBXO22
1418	DERL3
1419	CHI3L2
1420	ETS1
1421	ZCCHC6
1422	ST5
1423	TEF
1424	SPIN3
1425	PTPRF
1426	MLPH
1427	MAEA
1428	USP36
1429	ABHD3
1430	CAPG
1431	B4GALNT3
1432	PLXNA2
1433	IL7
1434	VPS13A
1435	MTMR14
1436	IMMP2L
1437	DMKN
1438	PCSK2
1439	SF1
1440	PPT2
1441	TRIM7
1442	TM9SF4
1443	C3orf55
1444	RAD51C
1445	TJP1
1446	VPS13C
1447	GNPAT
1448	TMEM5
1449	LPCAT1
1450	DUSP10
1451	CNIH3
1452	SIGIRR
1453	MAGI1
1454	MAP4K4
1455	ARF3
1456	CELSR1
1457	SHFM1
1458	FBXO5
1459	CACNB1
1460	ARL6IP6
1461	COBL
1462	OARD1
1463	VPS9D1
1464	FGFR3
1465	TPD52
1466	OLFM1
1467	AGPAT4
1468	TMEM121
1469	SPARCL1
1470	DFNB31
1471	FBXO31
1472	SLC9A3R1
1473	SPIN4
1474	FZD6
1475	MGEA5
1476	CDH23
1477	MYO9B
1478	SSFA2
1479	CHD3
1480	ERG
1481	EDF1
1482	NDFIP2
1483	EED
1484	RAB11FIP3
1485	KLK8
1486	PIGQ
1487	WDR4
1488	USP31
1489	MTSS1
1490	TRPS1
1491	IL10RA
1492	AES
1493	TMEM150A
1494	SGCA
1495	CAT
1496	ANAPC7
1497	ACSL5
1498	EBNA1BP2
1499	SRP54
1500	PPP1R12A
1501	MACROD1
1502	TNS1
1503	POLR3H
1504	PDE4B
1505	CPLX1
1506	RCOR3
1507	GABPB1
1508	CREB3L4
1509	FAM20C
1510	CD58
1511	ENO2
1512	PYROXD2
1513	GPR146
1514	CDKN2A
1515	MTOR
1516	POLR2G
1517	PKMYT1
1518	TBC1D2
1519	DHX32
1520	MPG
1521	ESRP1
1522	NEK9
1523	TAF10
1524	CDCA3
1525	PSMB8
1526	CNN3
1527	SPHK1
1528	PPFIA4
1529	POLR1D
1530	WDR61
1531	CEP63
1532	ZNF577
1533	COX7A1
1534	MAF
1535	LIMCH1
1536	PVR
1537	TMEM234
1538	LIN7A
1539	GLB1
1540	PHB2
1541	DNAJB4
1542	PRRT1
1543	SMARCA2
1544	SLC39A3
1545	HIC1
1546	CCDC149
1547	RAB17
1548	UBXN11
1549	FASTK
1550	CYP26B1
1551	ASAP3
1552	SND1
1553	TTC17
1554	HIPK1
1555	TEX261
1556	MRPL1
1557	DEAF1
1558	NDUFV1
1559	UBR1
1560	NDRG2
1561	FAM134B
1562	DEDD2
1563	WNT5B
1564	HN1L
1565	CCDC107
1566	VAMP4
1567	GPD1L
1568	EPB41L4B
1569	DDX42
1570	ALPL
1571	PNKP
1572	C21orf59
1573	PPP6R2
1574	PLCH2
1575	ITGBL1
1576	ZNF691
1577	ATP1A1
1578	STAMBP
1579	CGN
1580	TRAF3IP3
1581	RBM45
1582	REV3L
1583	FKBP15
1584	TANK
1585	DARS
1586	ATF2
1587	TRPV6
1588	LTA4H
1589	UBR4
1590	CARS2
1591	FLNA
1592	EXOC4
1593	NAA25
1594	SHC2
1595	LUM
1596	ANK2
1597	MAP3K12
1598	ALKBH7
1599	WAPAL
1600	SMAP2
1601	TMEM214
1602	B3GNTL1
1603	PLCL1
1604	TRIM36
1605	ASCC2
1606	UTRN
1607	PDGFRA
1608	HEXIM2
1609	ZNF579
1610	LST1
1611	REXO2
1612	STX6
1613	PSME4
1614	TMEM55B
1615	MPP1
1616	SLC35F5
1617	CCM2
1618	SEPT9
1619	ULK2
1620	CYBA
1621	LNX1
1622	GRHL3
1623	FAM189A2
1624	RCL1
1625	BBS1
1626	INPP4A
1627	CRBN
1628	PPP1R1B
1629	TRAPPC1
1630	ANGPTL1
1631	TET2
1632	TCF3
1633	ARHGAP30
1634	SCAMP2
1635	ZGPAT
1636	CANT1
1637	ZNF536
1638	S100A8
1639	APBB1
1640	MAMDC4
1641	ZG16B
1642	EFEMP2
1643	HCCS
1644	EIF4E3
1645	STARD9
1646	RRP12
1647	SNRNP40
1648	CENPP
1649	CLPB
1650	SLC4A2
1651	LRIG3
1652	TP53BP1
1653	ACSM3
1654	CPNE8
1655	MEGF8
1656	CPA1
1657	DUSP15
1658	TRAF3
1659	C1orf131
1660	BRSK2
1661	ATP2A3
1662	DNAJB2
1663	IL16
1664	UPF1
1665	PTK2
1666	RAB24
1667	ID3
1668	IBTK
1669	FUK
1670	PPP1R21
1671	AAAS
1672	HLA-DPB1
1673	RASAL2
1674	LDHB
1675	LARP4B
1676	ABCB8
1677	LIMS2
1678	AVIL
1679	MIPEP
1680	RARS
1681	AP006621.5
1682	PPP1R10
1683	FBXO38
1684	TCHP
1685	PLB1
1686	ECI1
1687	MTMR2
1688	OPA1
1689	CRLS1
1690	RCC1
1691	LRRFIP2
1692	TAPBPL
1693	SELP
1694	C18orf32
1695	NECAB3
1696	WLS
1697	VPS45
1698	DDX46
1699	ZFAND3
1700	CENPT
1701	ANGPTL2
1702	PCBP4
1703	HN1
1704	ROGDI
1705	PAPD4
1706	SLCO2B1
1707	MGP
1708	SMOC1
1709	RGS14
1710	RAPGEF4
1711	ORAOV1
1712	THOC1
1713	SLC20A1
1714	FBXO4
1715	STRN4
1716	ACRBP
1717	DHX16
1718	SEC16A
1719	MBD5
1720	GALNT2
1721	SUPT3H
1722	MAP3K11
1723	USP47
1724	TBX5
1725	ZFYVE19
1726	UBR3
1727	WARS
1728	PSMD6
1729	TTC7B
1730	TRA2A
1731	DOCK6
1732	SACS
1733	SEC14L2
1734	EVA1B
1735	MEF2C
1736	CST7
1737	PHF2
1738	SOGA2
1739	GRN
1740	TNNC2
1741	ITGB3BP
1742	ATXN1
1743	IDH3B
1744	GARS
1745	CCT2
1746	TUBA4A
1747	URI1
1748	RFX2
1749	DRAP1
1750	NAF1
1751	CYP4B1
1752	ING1
1753	MTMR4
1754	HCFC1
1755	PPFIA1
1756	PIAS3
1757	C15orf41
1758	CSF1R
1759	RAP1GAP2
1760	WDFY3
1761	NFIX
1762	TELO2
1763	TTC37
1764	GALE
1765	SBF1
1766	MAPK7
1767	TACC2
1768	ZNF385B
1769	ULK3
1770	COL17A1
1771	ABLIM2
1772	HAND2
1773	FBN1
1774	ARHGAP33
1775	PLOD2
1776	GTF3C1
1777	PPP6R1
1778	BRAT1
1779	POPDC2
1780	TP53I11
1781	GCNT2
1782	ENG
1783	CDK17
1784	MRPL33
1785	TPRA1
1786	PLK2
1787	ATL1
1788	PRKCDBP
1789	MTA1
1790	PITX2
1791	OBSL1
1792	TTN
1793	SLC7A6
1794	UBE2Q2
1795	SOCS2
1796	LAMB3
1797	FARP1
1798	MFI2
1799	CRY2
1800	ESAM
1801	SSH3
1802	GDPD3
1803	ACLY
1804	FSTL1
1805	PTPN21
1806	CALU
1807	RAD50
1808	MYO18A
1809	RNF123
1810	SMARCD2
1811	CCDC80
1812	AP3B1
1813	GBE1
1814	ST6GALNAC6
1815	KLC1
1816	C8orf46
1817	SLC36A4
1818	P4HA2
1819	CEP57
1820	SLC6A6
1821	PDE8A
1822	NFKB1
1823	HSD17B4
1824	PPAP2A
1825	CAPN3
1826	TEAD1
1827	RND3
1828	IL2RG
1829	DUSP14
1830	BAIAP2L1
1831	DOK7
1832	NRF1
1833	ITGB6
1834	NCOA1
1835	VEPH1
1836	USP24
1837	CHD1L
1838	PTGFRN
1839	CNOT3
1840	POLB
1841	ATG4D
1842	HPS4
1843	RARB
1844	MBNL2
1845	AGL
1846	SULF1
1847	CDC16
1848	PPP1R9B
1849	MFSD8
1850	MMRN1
1851	ASCC3
1852	SARM1
1853	CD72
1854	HELQ
1855	YAE1D1
1856	CSTF1
1857	ZNF274
1858	ITPA
1859	TPK1
1860	CHD6
1861	MME
1862	WRNIP1
1863	ST3GAL4
1864	ALG6
1865	ZHX1
1866	MAP3K1
1867	PARD3
1868	RBPMS2
1869	TNFSF13
1870	EIF3G
1871	SMAP1
1872	C2CD2
1873	NGFRAP1
1874	CXCL3
1875	ENPP2
1876	RTKN2
1877	RIT1
1878	LCNL1
1879	SYTL2
1880	TSTD2
1881	SLC25A35
1882	PSMD1
1883	PRSS22
1884	UBXN4
1885	EPHX2
1886	LRRC8A
1887	SHKBP1
1888	EPS8
1889	FAIM2
1890	FAM65A
1891	CEP192
1892	SEPT4
1893	MUC15
1894	ATP5SL
1895	KRT13
1896	NCBP2
1897	MIEF1
1898	ACACA
1899	TYMS
1900	KCNIP3
1901	PTBP1
1902	CUTA
1903	FRMD3
1904	MTCH2
1905	CD79B
1906	FRMD6
1907	ZZEF1
1908	DUSP3
1909	ZDHHC5
1910	GMPR2
1911	LRP5
1912	COL9A3
1913	ATL2
1914	LHFPL2
1915	AGPAT1
1916	ZNF623
1917	VAMP2
1918	ZDHHC9
1919	MDH2
1920	RBP5
1921	IL1RN
1922	RSAD1
1923	PHC2
1924	CREBRF
1925	ANKRD23
1926	AKAP6
1927	HSPA4
1928	RNF166
1929	ALDH1L1
1930	EIF4G2
1931	KIAA0408
1932	DHX58
1933	PINLYP
1934	AHDC1
1935	HDAC3
1936	PQBP1
1937	RALGAPB
1938	SMPDL3A
1939	EFCAB7
1940	ZNF514
1941	PPRC1
1942	MAPRE3
1943	SCARA5
1944	PASK
1945	CENPM
1946	FGR
1947	RNF34
1948	PDK2
1949	GCFC2
1950	CTIF
1951	OSBPL6
1952	TAX1BP1
1953	WDR13
1954	TCEA3
1955	CTNNAL1
1956	GRB10
1957	EPHB1
1958	SGK2
1959	COMMD7
1960	IZUMO4
1961	PPFIBP2
1962	ZNF251
1963	SCN4B
1964	HFE2
1965	SFTA3
1966	KDM3A
1967	NSMF
1968	EBF1
1969	L3HYPDH
1970	SERPINF2
1971	C1orf159
1972	NAPEPLD
1973	DDAH2
1974	DCUN1D4
1975	SAMSN1
1976	TPR
1977	GABRE
1978	TINF2
1979	WIPI1
1980	ACAD10
1981	TMEM63A
1982	PDZD2
1983	CACNB3
1984	AVL9
1985	PXMP2
1986	DSC2
1987	ARAP2
1988	WIPI2
1989	ADD1
1990	PRRG1
1991	IRF7
1992	AP2M1
1993	PJA1
1994	HDAC8
1995	TRMU
1996	HPGD
1997	FANCL
1998	ZNF507
1999	TMCC3
[truncated: 4,649 more rows]

## Sheet: IR-IR
rank	hub
1	MXRA8
2	IGFBP3
3	PPM1G
4	TMUB1
5	MRPS34
6	CST3
7	CAPZB
8	LMNA
9	DUT
10	CLK1
11	ACADVL
12	IRF2BP2
13	ATP2B4
14	MIDN
15	PALLD
16	ITM2B
17	C7orf43
18	IQGAP1
19	PLSCR1
20	SAP18
21	WDR33
22	RILP
23	SEC61A1
24	CYTH1
25	EPAS1
26	TSPYL2
27	TRIM47
28	CFD
29	TMEM123
30	CASC3
31	ATOH8
32	NPTN
33	FOSL2
34	DCN
35	TFG
36	TNKS1BP1
37	BBC3
38	GUK1
39	ACADM
40	SLC27A3
41	SDF4
42	LENG8
43	PPP1R9B
44	SPTBN1
45	SRSF7
46	DIAPH1
47	COL6A3
48	RER1
49	ANXA6
50	ZNF580
51	DDX5
52	AEBP1
53	CD2BP2
54	RTN4
55	TSC22D3
56	HOXB2
57	ECH1
58	MMP2
59	COL1A2
60	GSN
61	CDK16
62	SLC39A3
63	RBM33
64	NUCB1
65	CLINT1
66	SH3BGRL3
67	C1S
68	SRSF1
69	SMARCA2
70	ZBTB1
71	ZNF800
72	RELA
73	COL6A1
74	DDRGK1
75	MYH14
76	PNPLA2
77	LTBP4
78	XBP1
79	CAV1
80	CLTC
81	PRPF8
82	SH3GLB1
83	C1orf122
84	SERP1
85	TIMP1
86	EVA1B
87	DARS
88	ARFGEF1
89	FBXL19
90	HDAC7
91	EFR3A
92	ZC3H13
93	PPM1A
94	DDX17
95	SATB1
96	GBE1
97	RAB11FIP5
98	MAPK3
99	CCND3
100	ITM2A
101	STRIP1
102	TXNIP
103	ATP5B
104	FAM160A2
105	GSE1
106	TMBIM6
107	MYH11
108	CIRBP
109	LRP1
110	TANC1
111	MPG
112	DYNC1H1
113	NDRG1
114	P4HB
115	C18orf32
116	PCNX
117	UPF1
118	MKNK2
119	MBTPS1
120	SIL1
121	SIPA1
122	C20orf24
123	HNRNPLL
124	CREBZF
125	CLSTN1
126	NT5C
127	NFKB1
128	CLPTM1
129	APP
130	MECP2
131	ST6GALNAC6
132	AES
133	OS9
134	ACSL1
135	PTPRS
136	KTN1
137	MAPRE2
138	CAPN1
139	ATF1
140	PDZRN3
141	SLC3A2
142	HEXB
143	LYST
144	PINK1
145	LDHB
146	PRRC2B
147	EPS15
148	FERMT2
149	UBTF
150	MEPCE
151	MEF2D
152	LAMB1
153	TMEM259
154	HYI
155	ARL6IP6
156	HDLBP
157	MGP
158	LGALS3BP
159	MRC2
160	ANKRD9
161	MTA2
162	SETX
163	HSPG2
164	HIPK1
165	TSC22D2
166	PCBP4
167	RAB2A
168	ATP6V0B
169	VCL
170	RBPMS2
171	VPS13B
172	HNRNPM
173	UBE2G1
174	GRASP
175	CREBBP
176	EIF4G1
177	PFKFB3
178	KLF2
179	MXI1
180	CDKN1C
181	ACIN1
182	ARGLU1
183	ASPH
184	CPSF6
185	ATP2A2
186	SDC2
187	SLC9A3R1
188	RNASET2
189	SUV420H1
190	LONRF1
191	GBP2
192	BACE1
193	KIAA0430
194	KLF6
195	CELF2
196	FSTL1
197	LMAN2
198	TPRA1
199	SLC38A10
200	C8orf82
201	CCDC50
202	CD47
203	AGRN
204	TMEM165
205	EPC2
206	USP25
207	CFL2
208	RBPMS
209	MCM3AP
210	USP40
211	SNAPC2
212	PCOLCE
213	AP2S1
214	LRRK2
215	PRDM2
216	CCNG2
217	PTTG1IP
218	AKAP8L
219	GPAA1
220	ALS2
221	FBXO32
222	SYNM
223	INF2
224	SH3D19
225	SRPX
226	RHBDD2
227	TEAD1
228	MMP28
229	ARID1A
230	ERF
231	QTRT1
232	RBM25
233	ACSS2
234	HCFC1
235	FMNL2
236	ABR
237	UBE2I
238	CD164
239	DAAM1
240	OGT
241	SHFM1
242	CALM1
243	SSFA2
244	MAX
245	ADNP
246	PSMD6
247	ALKBH7
248	SRCAP
249	USP53
250	GRN
251	TCF12
252	ATP5E
253	ZDHHC5
254	MTOR
255	REXO2
256	PPP1CB
257	DIAPH2
258	THRA
259	LOXL1
260	QSOX1
261	COX7A1
262	MBNL1
263	CELSR2
264	MED23
265	ARHGEF10L
266	COL18A1
267	TGFBI
268	RNASEH2C
269	SBNO2
270	SUPT6H
271	TRIO
272	RBL2
273	MARCH7
274	IVNS1ABP
275	RXRA
276	FBXO3
277	ZNF414
278	KDM2A
279	ZBTB7A
280	TOPORS
281	SND1
282	EMILIN1
283	ADD1
284	CMTM3
285	FAM20C
286	PTPRF
287	FKBP10
288	CRTC1
289	GPRC5B
290	SPTAN1
291	FAM122B
292	ADAMTS1
293	TRAK1
294	B3GNT2
295	PPP2R4
296	SLC1A5
297	ZNF511
298	IBTK
299	WAPAL
300	CLK4
301	EGLN2
302	MYO1E
303	VPS13C
304	LARP6
305	SCPEP1
306	ARHGEF11
307	KLF16
308	NEK9
309	ALG2
310	ATP13A3
311	OXA1L
312	PPP1R16A
313	SEC16A
314	MYO18A
315	MTM1
316	ITGB4
317	ELAC2
318	ZEB2
319	WRNIP1
320	EPG5
321	IFNGR1
322	DMD
323	UCK2
324	ATF3
325	SPIDR
326	TRIB2
327	HECTD2
328	PLOD2
329	PCGF5
330	CDC42BPA
331	COASY
332	SMTN
333	HUWE1
334	UNC45A
335	PPP3CA
336	WNK1
337	PPP6R1
338	FBXL15
339	MPDZ
340	NUP205
341	CDH11
342	MARCH6
343	PPP6C
344	LTBP1
345	TSC2
346	CABLES1
347	CD163
348	ABI3BP
349	CDS2
350	NELFE
351	NOTCH4
352	GTF3A
353	UBR3
354	PMP22
355	MTR
356	BCCIP
357	ZCCHC6
358	DHX15
359	PHF21A
360	CDC42EP3
361	MBNL2
362	DCLK1
363	PSMD11
364	SEPHS2
365	PLEC
366	REV3L
367	HNRNPA2B1
368	HIRIP3
369	DYRK2
370	PTBP1
371	RASIP1
372	LEMD2
373	PIGT
374	MAP3K8
375	AUP1
376	C3orf58
377	PRKAG2
378	TRAPPC5
379	LSP1
380	GNAI1
381	PREX1
382	POGK
383	PHF15
384	DLG5
385	CSTF3
386	CALU
387	SLC7A8
388	MSH6
389	PEX1
390	STARD9
391	SNX13
392	ATP6V1C1
393	HACE1
394	DNAJA2
395	CTSF
396	RNPEP
397	SLC38A2
398	FAM173A
399	DMXL1
400	PSMB4
401	CAPN2
402	SLC19A1
403	FAM120B
404	PIK3R1
405	AKAP12
406	SESN1
407	KLF3
408	SLC25A46
409	CD44
410	RBM26
411	PSMA3
412	PHLDB1
413	CYP26B1
414	GIGYF2
415	TMEM237
416	ARID5A
417	SLC44A2
418	POR
419	TAX1BP1
420	EDEM3
421	DYSF
422	SH3KBP1
423	TLN2
424	DDX42
425	NPNT
426	PFKL
427	PRKAR1A
428	DCAF5
429	SCARA5
430	RCE1
431	ARIH1
432	NUP214
433	MKLN1
434	CKAP2
435	PEPD
436	EPS8
437	UBE2E1
438	NIPBL
439	ATF2
440	MYO9B
441	ARID2
442	SRF
443	WWP2
444	MCM9
445	MKL2
446	UGP2
447	TPR
448	FXYD1
449	PHF1
450	RARA
451	TMEM55A
452	DPP7
453	TRAPPC12
454	INTS3
455	BNIP2
456	NFIC
457	MKKS
458	ITGA1
459	JUND
460	CYSTM1
461	HECTD3
462	PRKACA
463	MTMR4
464	SLC41A1
465	FRYL
466	LYSMD2
467	EML3
468	MAP4
469	PLXNB2
470	RNF103
471	POSTN
472	DCTN1
473	SLC4A2
474	C6orf48
475	SMARCD2
476	SLC39A10
477	DGAT1
478	CAMTA2
479	HNRNPH3
480	SMCHD1
481	LUM
482	UBXN6
483	CBLB
484	NAV2
485	CALD1
486	EHBP1L1
487	FAM129B
488	DKK3
489	BIN1
490	WDFY3
491	CUX1
492	SEC24C
493	PPFIA1
494	DAB2
495	C1orf198
496	SEPT5
497	ADAMTSL4
498	KLF13
499	XPO1
500	TUT1
501	BCL6
502	P4HTM
503	FXR1
504	PMEPA1
505	DNM2
506	KIF22
507	DNMBP
508	MEIS1
509	TMEM5
510	BUB3
511	METRN
512	CALM3
513	AOX1
514	PPP2R1A
515	MYO1B
516	MARS
517	CACNA1H
518	NUDT16L1
519	PHF2
520	MMRN1
521	CRYAB
522	ITGA7
523	BAZ2A
524	GORASP2
525	PKD2
526	ETS1
527	TACC1
528	ANXA5
529	ACVR2A
530	SAMD1
531	RBM14
532	RAB34
533	DDB2
534	ATRN
535	SENP3
536	DDX39A
537	C12orf75
538	FLNB
539	ZNF385A
540	PATZ1
541	COQ9
542	PPIG
543	EXOC4
544	PSAP
545	AMOTL1
546	LPHN2
547	RAB30
548	CLASP1
549	NFATC1
550	KLHL29
551	AMFR
552	ACOT8
553	C7orf41
554	SLC44A1
555	MFSD10
556	PRPF38B
557	RASSF1
558	CLEC2B
559	NMT1
560	RAB18
561	TOM1
562	ZNF213
563	SESTD1
564	TNFSF12
565	AURKAIP1
566	FAT1
567	MARK2
568	ARHGAP10
569	CBLL1
570	PSMD1
571	ZNF644
572	COL14A1
573	BOLA1
574	VPRBP
575	SHISA4
576	QKI
577	DDX24
578	SRA1
579	SAP30L
580	HSD17B4
581	TIAL1
582	MAP7D1
583	MCMBP
584	MOGS
585	RGL2
586	CAMK2D
587	ADAMTS2
588	SLC20A2
589	PLTP
590	TMEM126B
591	ZMYM2
592	SMAD6
593	BSCL2
594	ALDH4A1
595	MSL1
596	LSM6
597	CHD4
598	FBXW5
599	IFI16
600	ARAP3
601	SIK3
602	CRAMP1L
603	PCED1A
604	TBC1D23
605	RUNX1
606	CHD9
607	LONP1
608	SHOC2
609	HCLS1
610	ZBTB16
611	CALCOCO1
612	HMHA1
613	ROGDI
614	RNF217
615	PLS3
616	MYOF
617	N4BP1
618	C16orf45
619	MTUS1
620	ACSL3
621	TM9SF4
622	C17orf70
623	PTGFRN
624	TP53BP1
625	LMF1
626	CRLF1
627	EEPD1
628	EIF4G3
629	YTHDF3
630	RFNG
631	MERTK
632	PER1
633	NTN4
634	AGTR1
635	PPP3CB
636	KCNMA1
637	B4GALT2
638	PXN
639	SPEN
640	USP38
641	UBXN1
642	ASB1
643	ELMSAN1
644	NID1
645	TRAPPC8
646	CYLD
647	FBXO7
648	PDS5B
649	CTNNBIP1
650	COG1
651	PDZD2
652	EPHB4
653	DLC1
654	SLCO4A1
655	ADAMTS9
656	NBAS
657	RDH11
658	TMEM66
659	POFUT2
660	CMYA5
661	RABGAP1
662	UBE2J2
663	MAP3K1
664	PDLIM3
665	PRKD2
666	PIGK
667	DGAT2
668	NSD1
669	SLC39A6
670	MBP
671	IPO11
672	SYNGR1
673	SLC12A9
674	KEAP1
675	CD53
676	GULP1
677	GOLGB1
678	AGPAT3
679	SLC25A25
680	PODXL
681	SULF2
682	EMD
683	FOS
684	HECTD4
685	PTPRE
686	SRC
687	PRKACB
688	VASP
689	MAN1B1
690	POLR3E
691	GSK3B
692	U2SURP
693	SLCO2B1
694	ABCA5
695	PPP1R7
696	VSIG4
697	MDH2
698	PPP1R12A
699	ACAA1
700	SSNA1
701	SLC25A39
702	ASAP2
703	GPD1L
704	ATP1A1
705	BRE
706	C7orf55-LUC7L2
707	RBBP6
708	IL1R1
709	VTA1
710	SORBS1
711	ERG
712	TXNDC5
713	FEZ2
714	CAPN7
715	FYN
716	MYCBP2
717	TBRG4
718	ARID4B
719	DNAJB4
720	FYCO1
721	RNF41
722	ZBTB47
723	KIAA1551
724	FBLN2
725	DPM2
726	LTBP3
727	TP53I3
728	CCT2
729	CLASP2
730	MFGE8
731	GPATCH2
732	ARHGEF28
733	TBP
734	ARHGAP12
735	NCF4
736	DGKD
737	TLN1
738	DLAT
739	NFIX
740	LPAR1
741	USP35
742	CPNE3
743	SCRIB
744	XPR1
745	LIPE
746	MDC1
747	GYS1
748	UAP1
749	DEDD2
750	PKN1
751	RPRD2
752	ST3GAL4
753	ADCY5
754	IP6K2
755	LRRC32
756	ABLIM1
757	COL3A1
758	ABCB6
759	IFRD2
760	CXCL12
761	TIPARP
762	SAT1
763	CDC34
764	GSPT1
765	TYMP
766	CWC15
767	BCL9L
768	DOCK2
769	NGFRAP1
770	ALDOA
771	IGFBP7
772	RABGGTB
773	SLC39A7
774	MAP3K11
775	LIMCH1
776	CISD3
777	ADM
778	PITPNA
779	ABCA6
780	CTIF
781	SREK1
782	MARCH5
783	CPNE8
784	MTSS1
785	IFRD1
786	MYOM1
787	ST3GAL5
788	RTEL1
789	UPP1
790	GSTA4
791	JHDM1D
792	SLIT3
793	INPP4B
794	SYNPO2
795	TMEM214
796	GPC3
797	KIFC3
798	GPR56
799	NUDT5
800	PRRC2A
801	PSME4
802	MMP19
803	JTB
804	RORA
805	KLHL36
806	PTGER3
807	KHDRBS1
808	ARHGEF2
809	ADAM15
810	NFKBIZ
811	SMAP2
812	SLCO3A1
813	SETD2
814	NARS
815	ISLR
816	SLK
817	CCNK
818	YARS
819	IL18BP
820	PLXDC2
821	WBSCR17
822	CNNM3
823	JMJD1C
824	HCFC1R1
825	CDC42BPB
826	SLC2A4RG
827	TMEM201
828	NAV1
829	DNAJA4
830	INO80E
831	DDX47
832	DOPEY1
833	MFSD1
834	CCDC112
835	PPP1R35
836	LPCAT4
837	SEPT6
838	HNMT
839	FAM102A
840	ANKRD37
841	USP16
842	NFASC
843	PRUNE2
844	BHLHE40
845	C6orf211
846	HES4
847	PSMB10
848	CENPV
849	NIN
850	USP5
851	RSF1
852	CAT
853	PKIG
854	SLC10A3
855	EIF4G2
856	RABGAP1L
857	TRA2A
858	GLS
859	COG4
860	PPP1R1B
861	PNPLA7
862	ARHGAP33
863	PIEZO1
864	PLA2G2A
865	KCTD3
866	COPZ2
867	TM6SF1
868	AFAP1L2
869	AP3B1
870	HSPH1
871	NENF
872	NEDD4L
873	ANAPC2
874	TRIM7
875	VPS51
876	IMPDH2
877	PITPNM1
878	SORBS2
879	KIF13A
880	MUC1
881	TMEM51
882	CD81
883	CHTOP
884	RAB8A
885	STK38L
886	TCHP
887	ATP6V1H
888	PCOLCE2
889	CALML4
890	CDC42SE1
891	ZNF462
892	MDN1
893	RBM24
894	LRBA
895	PREB
896	FLNA
897	C7orf49
898	ST7
899	COL1A1
900	TAF10
901	TMEM2
902	COPZ1
903	ZFAND3
904	LRIG1
905	TNRC6B
906	PEA15
907	RNF166
908	SPARCL1
909	FBL
910	ROBO1
911	GMDS
912	EML4
913	NLRP1
914	MBOAT7
915	VPS39
916	SAC3D1
917	TFRC
918	NXF1
919	SACM1L
920	MZF1
921	AKAP8
922	THEMIS2
923	YLPM1
924	USP24
925	TRANK1
926	SYNJ1
927	PROSER2
928	BRD1
929	REEP5
930	RRAGD
931	DHPS
932	GPT2
933	NSMF
934	DSP
935	KPNA1
936	MAP3K7
937	CLSTN3
938	UBXN4
939	ZNF84
940	BICD2
941	MOB2
942	NR4A3
943	MPZL2
944	TBX2
945	CDK5RAP2
946	SMPD1
947	GABRE
948	CA12
949	NEXN
950	ARHGAP24
951	ARNT
952	CNN3
953	ANAPC5
954	RAB11FIP3
955	RPTOR
956	ARMC8
957	G6PD
958	NDST2
959	PHLDB2
960	RCAN2
961	RNMT
962	ICAM3
963	AKAP13
964	TBC1D16
965	HEATR2
966	ANKRD13A
967	RRP12
968	FRMD6
969	NEDD9
970	LRSAM1
971	POLR2B
972	FBXO42
973	CAPNS1
974	IDE
975	DCP1B
976	IFT140
977	LPCAT1
978	DAPK3
979	TNPO2
980	DHX32
981	PRDM1
982	FOXK2
983	WIBG
984	PTPN6
985	ACAD8
986	PC
987	ITGAV
988	BAP1
989	TOB1
990	CUL3
991	ARID5B
992	SCAMP3
993	PEX19
994	ERN1
995	FOSB
996	ITPR1
997	NCK2
998	TJP1
999	TCEB3
1000	IRX3
1001	FPGS
1002	PUM1
1003	THY1
1004	TPM2
1005	ZNF467
1006	GLDN
1007	GADD45B
1008	DNAJC4
1009	DUSP3
1010	SMNDC1
1011	SRP54
1012	OPA1
1013	ING3
1014	RBM22
1015	FLRT2
1016	EGFL7
1017	ATP8A1
1018	PPM1M
1019	DYRK1B
1020	GTF3C1
1021	BRPF3
1022	EPB41L3
1023	N4BP2L1
1024	FAM73B
1025	C21orf59
1026	EHBP1
1027	RNF10
1028	MAP2K3
1029	ZFC3H1
1030	MTMR10
1031	ITGB2
1032	FAM214A
1033	DTNA
1034	BAG6
1035	DDAH1
1036	EIF2B5
1037	LRIG3
1038	ILF3
1039	PLEKHG5
1040	OLFML3
1041	TSTD1
1042	CMIP
1043	FAM150B
1044	VPS13D
1045	CHN1
1046	CASZ1
1047	TNRC6A
1048	CDK17
1049	SUPT5H
1050	OSBPL1A
1051	MGEA5
1052	BCS1L
1053	KIAA2026
1054	DGCR2
1055	CTNNB1
1056	EPB41L5
1057	GALNT2
1058	FGFR1
1059	MYOM2
1060	PARM1
1061	HMCES
1062	AKAP9
1063	PODN
1064	ITGAE
1065	NPR2
1066	CCDC47
1067	SREBF1
1068	NR4A2
1069	SNX8
1070	TNC
1071	IL17RC
1072	ADARB1
1073	CELSR1
1074	PLCH2
1075	SELENBP1
1076	USP2
1077	COL4A5
1078	PHF19
1079	CSF1R
1080	NDFIP2
1081	HTRA3
1082	C9orf142
1083	TOLLIP
1084	ZNF579
1085	HSPA4
1086	CTNNAL1
1087	MRPL34
1088	CASK
1089	APMAP
1090	CCDC80
1091	CLMN
1092	STRA13
1093	EFCC1
1094	ZMAT1
1095	TAGLN
1096	PICK1
1097	C1R
1098	HYAL2
1099	PLAA
1100	NAA20
1101	EPS15L1
1102	GPR133
1103	FAM50A
1104	MYO1D
1105	DDR1
1106	GARS
1107	FUBP1
1108	RECK
1109	SLC52A2
1110	NLE1
1111	HOXD8
1112	INSIG1
1113	RNF146
1114	PPP6R2
1115	DHRS11
1116	WNT2B
1117	PPP1R14A
1118	ERBB2
1119	TRIM29
1120	KIAA1217
1121	ECM1
1122	LIMS2
1123	AP3D1
1124	SPTB
1125	MAT2B
1126	THAP4
1127	PFKP
1128	TYW3
1129	GDI1
1130	SQRDL
1131	PLOD3
1132	PITPNB
1133	THBS4
1134	RNF111
1135	PDE4D
1136	SLC9A1
1137	N4BP2L2
1138	PHF14
1139	TGM2
1140	SMARCD3
1141	MFSD7
1142	TMCC1
1143	RNF167
1144	FAM13A
1145	CARS2
1146	ENOPH1
1147	TRPS1
1148	SLTM
1149	MPP7
1150	C11orf35
1151	UTRN
1152	CDC42EP4
1153	SH3BGR
1154	GRK5
1155	BOC
1156	LRP5
1157	FBN1
1158	DST
1159	RAP1GDS1
1160	CUL4A
1161	RNF40
1162	KAZALD1
1163	ZNF449
1164	FAM20A
1165	SULF1
1166	VWA1
1167	RAPGEF5
1168	LZTR1
1169	RNF123
1170	WDR48
1171	TUBGCP6
1172	PSMA4
1173	INTS1
1174	HSBP1L1
1175	GLTSCR1
1176	VPS26B
1177	CLDND1
1178	MAP2
1179	GOLIM4
1180	NRD1
1181	SETDB2
1182	TANK
1183	TRAF1
1184	FMNL3
1185	PAPD4
1186	ANGPTL2
1187	SGCD
1188	RELB
1189	TRIB1
1190	STARD13
1191	NPDC1
1192	C1orf123
1193	AKT1S1
1194	AFAP1L1
1195	TBC1D10B
1196	SPNS2
1197	CTDP1
1198	C9orf72
1199	CPVL
1200	ITGA6
1201	PDK2
1202	VWA5A
1203	TESK1
1204	EBF4
1205	MTERFD3
1206	AKT1
1207	USP46
1208	ACSF2
1209	KIAA0196
1210	SLC9A8
1211	RBFOX2
1212	MEGF8
1213	ARFGAP1
1214	NHP2L1
1215	ZNF174
1216	ZZZ3
1217	EIF2S1
1218	PCGF2
1219	WDR46
1220	CREB5
1221	USP28
1222	RIN2
1223	MGAT1
1224	RCCD1
1225	DYNC1LI2
1226	AHSA1
1227	FAM69B
1228	C16orf58
1229	USP36
1230	DIXDC1
1231	ARHGEF40
1232	XXYLT1
1233	TNFRSF14
1234	TMEM62
1235	YPEL5
1236	ANKH
1237	LACTB2
1238	SLC15A3
1239	DROSHA
1240	CDC37L1
1241	SORL1
1242	CHD6
1243	DBN1
1244	TMEM248
1245	SNX24
1246	LYNX1
1247	HSF1
1248	SARS
1249	MAL
1250	PDE8A
1251	SEPT9
1252	MARK1
1253	NDUFAF6
1254	DDIT3
1255	VEGFB
1256	FZD6
1257	TRIM25
1258	MPZ
1259	FAM219B
1260	TTYH3
1261	TCEA2
1262	MAST4
1263	ACAP1
1264	CPEB4
1265	ATP2B1
1266	SLC22A17
1267	GCHFR
1268	CLN5
1269	KIAA0368
1270	SQLE
1271	NXPH3
1272	AXIN1
1273	CUEDC1
1274	WDR81
1275	ARMCX4
1276	BICD1
1277	FNDC3A
1278	PELO
1279	HLA-DMB
1280	ASH1L
1281	BRD8
1282	ABCC5
1283	PJA1
1284	PHF11
1285	PTPN13
1286	MPP1
1287	DENND4C
1288	KLK11
1289	MAGI1
1290	ANXA1
1291	RGS1
1292	ASCC2
1293	WAC
1294	PRPF39
1295	ZNF518B
1296	DNMT3A
1297	FAM126A
1298	ID3
1299	DSG1
1300	DOCK6
1301	SIPA1L1
1302	PHF20L1
1303	FBXO18
1304	C2CD2
1305	TRAPPC11
1306	SERPING1
1307	RIN1
1308	S100A16
1309	BCKDHA
1310	PTPRB
1311	EBF1
1312	PAN3
1313	IMP3
1314	LDLRAD4
1315	NDUFV1
1316	ITFG1
1317	OXLD1
1318	SPSB3
1319	HMCN2
1320	MAPKAP1
1321	TACC2
1322	CNST
1323	VAPB
1324	STARD5
1325	DENND5A
1326	TGM1
1327	ODF3B
1328	NR3C1
1329	NFE2L2
1330	WRN
1331	RAI2
1332	CRLS1
1333	DHX16
1334	PCTP
1335	HN1
1336	POLR3H
1337	LMO7
1338	DGCR8
1339	DLG1
1340	HIPK3
1341	BID
1342	RASSF4
1343	CPNE2
1344	C6orf106
1345	DMPK
1346	LRP4
1347	ME1
1348	TRAP1
1349	ZNF775
1350	STIM2
1351	SBF1
1352	BCOR
1353	GNL1
1354	SMG6
1355	DNMT1
1356	SSSCA1
1357	ZNF768
1358	ASXL2
1359	BRAP
1360	WWC3
1361	TEX10
1362	PARP10
1363	GFER
1364	CMTM4
1365	CGGBP1
1366	EPC1
1367	STX4
1368	SEMA4B
1369	ARHGEF16
1370	TRRAP
1371	PRKG1
1372	MAN2B1
1373	EPHX3
1374	ZHX3
1375	HEMK1
1376	C21orf2
1377	PAM
1378	BCAP29
1379	TIMMDC1
1380	MALT1
1381	ZZEF1
1382	FAM189A2
1383	MBOAT2
1384	PNKD
1385	DNAJB2
1386	CPSF3L
1387	SPARC
1388	WDR11
1389	ALAS1
1390	ACAP3
1391	SDHB
1392	LGALS8
1393	TRO
1394	DERL1
1395	MRPS25
1396	ALPL
1397	MTCH1
1398	PLIN1
1399	WHSC1L1
1400	CLIP4
1401	SMAP1
1402	TMEM110
1403	KDM3B
1404	HSPBP1
1405	VAMP4
1406	KIAA1462
1407	ZBTB21
1408	KRT7
1409	DCTPP1
1410	CGN
1411	C1orf52
1412	PPP1R18
1413	FILIP1
1414	ATP9A
1415	PTH1R
1416	MTA3
1417	SCARB1
1418	TBC1D10A
1419	PDE2A
1420	ARF3
1421	GRAMD4
1422	SLC6A6
1423	GATM
1424	PTGDS
1425	TBC1D25
1426	UCHL5
1427	LZIC
1428	APRT
1429	TMEM8B
1430	FAF1
1431	CHRDL1
1432	RPGR
1433	SPHK1
1434	ITGA5
1435	DUSP10
1436	CD59
1437	DRAP1
1438	NFKBIA
1439	DYRK1A
1440	CABIN1
1441	ADHFE1
1442	CKB
1443	EIF2A
1444	SCAMP2
1445	CDK13
1446	NOSTRIN
1447	PAOX
1448	WIPF1
1449	TRAPPC10
1450	USP47
1451	TRADD
1452	AHDC1
1453	ESRP1
1454	AGAP1
1455	SF3B2
1456	FIP1L1
1457	PEMT
1458	SLC7A6
1459	TSEN34
1460	TJP2
1461	ARNTL
1462	RAI1
1463	RELT
1464	SIKE1
1465	NAA25
1466	VAC14
1467	TPCN1
1468	ANKRD13D
1469	RALB
1470	MTMR11
1471	RUFY2
1472	SGSH
1473	GALNT11
1474	LUC7L3
1475	CHMP1A
1476	TP53I11
1477	KAT6B
1478	CAB39L
1479	CFI
1480	CTNNBL1
1481	TEAD3
1482	PWWP2A
1483	BCAR3
1484	MYO5A
1485	WDR47
1486	GAREM
1487	PIK3R3
1488	VPS13A
1489	CAMSAP1
1490	FBXO8
1491	PITPNM2
1492	PNP
1493	NR2F1
1494	MTFR1
1495	CEP57
1496	NAA30
1497	SH3BP5L
1498	SLC29A1
1499	ALDH1L1
1500	CNR1
1501	ZNF185
1502	CDC25B
1503	ATF7
1504	EIF2AK4
1505	PARD3
1506	PALMD
1507	HCFC2
1508	HLA-DMA
1509	AZI1
1510	MCOLN1
1511	TMEM109
1512	IL17D
1513	PTK2B
1514	MYL5
1515	MYL6B
1516	TMEM184B
1517	TPD52
1518	RUSC1
1519	TRIM27
1520	NFIA
1521	PPP1R8
1522	KAZN
1523	CNOT1
1524	CADPS2
1525	NFIB
1526	ZNRF1
1527	SNRNP40
1528	PSMF1
1529	HAPLN3
1530	DNAJB11
1531	TIAM2
1532	HMG20A
1533	PRMT2
1534	EHD1
1535	ZXDC
1536	C16orf89
1537	MRPS14
1538	RND3
1539	ERCC2
1540	PCDH7
1541	SPG11
1542	ACAD11
1543	LAMA4
1544	PAXBP1
1545	ADD3
1546	DTX1
1547	SOX12
1548	UBE2D1
1549	SPOCK2
1550	TMBIM1
1551	SLC45A4
1552	ZDHHC3
1553	RRP1B
1554	TMEM175
1555	COBLL1
1556	ARHGAP32
1557	RNASEH2B
1558	VRK2
1559	SNRNP70
1560	BAZ1A
1561	CD37
1562	HSPB11
1563	MLPH
1564	MFSD6
1565	PPP2R1B
1566	RDH14
1567	PHACTR2
1568	ADAR
1569	ARAP1
1570	ELMO2
1571	RIT1
1572	HGF
1573	TTC32
1574	SIRT7
1575	CDADC1
1576	MMS19
1577	APBB2
1578	EIF4E3
1579	HSPA14
1580	RB1
1581	MXD4
1582	S100A13
1583	POC1B
1584	ING1
1585	GLIPR1
1586	PPP1R37
1587	CRELD1
1588	SCAP
1589	YIPF1
1590	CDKN2C
1591	ACTN2
1592	GLA
1593	RHOC
1594	PGAP3
1595	NAB2
1596	CERS3
1597	CAMSAP2
1598	ZFHX3
1599	IGF1
1600	SCAF4
1601	SIDT2
1602	NID2
1603	ENTHD2
1604	ZGPAT
1605	TNFRSF12A
1606	NIPAL3
1607	CSK
1608	BIRC6
1609	RAP1GAP2
1610	NCOA3
1611	ATP7A
1612	ZNF358
1613	CEPT1
1614	HSPB7
1615	COG5
1616	EED
1617	CRNKL1
1618	CHD8
1619	MDM1
1620	AGBL5
1621	PHF8
1622	HERPUD1
1623	PUF60
1624	GCN1L1
1625	PIK3R4
1626	HIVEP3
1627	WDR86
1628	TRAPPC1
1629	SLC35A2
1630	GPATCH2L
1631	SLAIN2
1632	UBE2Q2
1633	SECISBP2L
1634	DPYSL3
1635	USP31
1636	CCDC88C
1637	GPSM1
1638	TRPC4AP
1639	MTCH2
1640	DHX38
1641	DUSP23
1642	EPRS
1643	ANXA4
1644	TP53I13
1645	DOCK4
1646	GAK
1647	ATG16L2
1648	USF2
1649	FAM114A2
1650	TET2
1651	PITRM1
1652	EVL
1653	WBSCR22
1654	NBEA
1655	UBN1
1656	hsa-mir-1199
1657	GNPAT
1658	GPATCH8
1659	LIPA
1660	PET112
1661	MX2
1662	TNIP1
1663	SIGLEC1
1664	SLBP
1665	HERC3
1666	KRR1
1667	TBX3
1668	ITGB5
1669	CEP85
1670	ANKRD17
1671	NT5DC1
1672	PHKB
1673	CDKN2B
1674	PARP9
1675	RUFY1
1676	FBXO38
1677	BIN3
1678	PUM2
1679	MINK1
1680	FAT2
1681	ASAP3
1682	ARHGAP30
1683	SIX5
1684	GPR108
1685	SLC4A7
1686	SH3GLB2
1687	TC2N
1688	AGFG1
1689	ZC3H4
1690	SLC9A9
1691	DMAP1
1692	FAM214B
1693	PJA2
1694	GOLGA1
1695	PLEKHM2
1696	PDLIM7
1697	PVRL1
1698	HOXC9
1699	RNF214
1700	MED16
1701	ARHGEF19
1702	THBS1
1703	AIMP1
1704	PGRMC2
1705	RASSF5
1706	MITD1
1707	ALCAM
1708	CHD1
1709	TRA2B
1710	ANKRA2
1711	CYFIP2
1712	WIPI1
1713	RAB25
1714	MEF2C
1715	FLI1
1716	IFT27
1717	BRD4
1718	SLC35F5
1719	DDX26B
1720	HSDL2
1721	EMCN
1722	SPATA13
1723	TBC1D14
1724	EGLN3
1725	CEP290
1726	TRIM41
1727	MICU1
1728	UROD
1729	DNAJB12
1730	HAUS7
1731	BIRC2
1732	SH3BP4
1733	ATAD2B
1734	SAMSN1
1735	OAF
1736	SREBF2
1737	PTGES2
1738	YKT6
1739	MAP3K4
1740	GMPR2
1741	NEO1
1742	AP2M1
1743	JAG2
1744	SCFD1
1745	AKAP6
1746	ARRDC2
1747	HEBP2
1748	CCDC107
1749	PLCL1
1750	PRKCH
1751	JAM3
1752	TPRG1
1753	FAM65B
1754	BIRC3
1755	SACS
1756	HCCS
1757	ULK2
1758	EXT2
1759	MAGED1
1760	FAM120C
1761	STK39
1762	RABGGTA
1763	NAT10
1764	ADAMTS12
1765	EMP3
1766	UBP1
1767	MIEN1
1768	LRPPRC
1769	FLOT2
1770	ROBO4
1771	CDK18
1772	ARL6IP4
1773	SGCE
1774	THOC1
1775	KHNYN
1776	DENND4B
1777	PCNXL3
1778	ENO2
1779	SLC36A4
1780	CDK9
1781	PTPRZ1
1782	STK17A
1783	CNRIP1
1784	RCOR3
1785	C5orf38
1786	PLK2
1787	ARL1
1788	AQP3
1789	RBM42
1790	HPS4
1791	NAT14
1792	AATK
1793	NR2C1
1794	PTS
1795	ACD
1796	FRY
1797	TMEM164
1798	STXBP2
1799	NPR1
1800	ERAL1
1801	C1QTNF7
1802	PFKFB2
1803	CHI3L1
1804	ATG4B
1805	RASGRF2
1806	ZDHHC9
1807	ST5
1808	GAB1
1809	PRPF31
1810	RALGAPB
1811	FEZ1
1812	CAAP1
1813	UBE2A
1814	TRABD
1815	DENND1C
1816	MAEA
1817	DECR1
1818	LYPLAL1
1819	CHCHD7
1820	MIB2
1821	TMCO3
1822	GPT
1823	SLC19A2
1824	RANBP9
1825	RASAL2
1826	CNIH1
1827	CDKN1A
1828	SLC15A4
1829	MED10
1830	FAM208B
1831	ESYT1
1832	CUL2
1833	PIH1D1
1834	ZNF507
1835	KDM3A
1836	FPGT
1837	TK2
1838	TMX3
1839	ELTD1
1840	ZMAT2
1841	PLXNA2
1842	ZNF276
1843	FAM84A
1844	IL34
1845	TLE3
1846	RTN1
1847	CTSA
1848	TEX261
1849	SLC35C2
1850	ATG16L1
1851	WLS
1852	TBCD
1853	CEP89
1854	C1orf213
1855	HLF
1856	ARRB1
1857	DOCK7
1858	TMEM79
1859	MEIS2
1860	SEMA4D
1861	SCAF8
1862	CNTRL
1863	MAPKAPK3
1864	TMED5
1865	PLCD1
1866	RBM17
1867	UBALD2
1868	STX6
1869	MTMR14
1870	GGNBP2
1871	RRNAD1
1872	GDE1
1873	TCF25
1874	PTPRM
1875	LDLRAD2
1876	HMG20B
1877	MAU2
1878	TMEM38B
1879	CPEB2
1880	SCML1
1881	PLAGL1
1882	TSC22D4
1883	TNFAIP2
1884	GDPD5
1885	PLSCR4
1886	USP19
1887	NRP2
1888	CCDC39
1889	OBSL1
1890	PPP1R32
1891	SDCBP2
1892	UBA3
1893	UNC119
1894	UFSP2
1895	ID1
1896	TMEM55B
1897	IQCG
1898	ZNF608
1899	TPRN
1900	PAPSS2
1901	PRCC
1902	UQCRC1
1903	BAIAP2
1904	CLDN15
1905	HN1L
1906	KDM4C
1907	ZDHHC18
1908	MTF2
1909	TUBA4A
1910	FBXW7
1911	APPBP2
1912	RC3H2
1913	KLK8
1914	SLC5A6
1915	RBM47
1916	RNF149
1917	BTBD2
1918	SORBS3
1919	LRIF1
1920	KALRN
1921	MAP3K5
1922	MINA
1923	SPTBN2
1924	LIN7A
1925	NDUFAF3
1926	GYLTL1B
1927	HTATIP2
1928	KRT23
1929	NCKAP5L
1930	SNED1
1931	AQP1
1932	C19orf26
1933	SMARCA4
1934	MAF1
1935	TRAM1
1936	PPP1R13B
1937	CCM2
1938	SF3A1
1939	TMOD1
1940	CAST
1941	PPP2R2A
1942	PPME1
1943	C16orf52
1944	SMARCC2
1945	PANK1
1946	FAM49A
1947	DENND2D
1948	ABLIM3
1949	STAT6
1950	HIRA
1951	EFTUD2
1952	HDAC3
1953	SNRNP25
1954	DENND4A
1955	IQCJ-SCHIP1
1956	OSBPL6
1957	ZFP36L1
1958	ACAD9
1959	HIPK2
1960	ILK
1961	ENPP2
1962	FASTK
1963	ATN1
1964	ABHD3
1965	TBC1D8
1966	LMBRD1
1967	ABCB7
1968	UBALD1
1969	UBQLN1
1970	TSTD2
1971	FN3K
1972	WDR60
1973	SEC14L2
1974	CPD
1975	ARMC6
1976	C1orf116
1977	FAM134B
1978	KCNH2
1979	MACROD1
1980	ACACA
1981	MCF2L
1982	ULK1
1983	HDAC8
1984	PDXP
1985	NCALD
1986	GYG2
1987	MGAT4B
1988	IMP4
1989	MYBPC1
1990	STX3
1991	PDE8B
1992	TCP11L1
1993	EPHA1
1994	CHD3
1995	FGFR3
1996	BMPR2
1997	SMIM4
1998	ITGBL1
1999	CCDC61
[truncated: 5,192 more rows]
