# Supplementary material for: Co-expression networks reveal the tissue-specific regulation of transcription and splicing
Source: Genome Res. 2017 Nov;27(11):1843–58. doi: 10.1101/gr.216721.116 (PMC5668942; doi:10.1101/gr.216721.116)
Supplement: Supplemental Material [file supp_gr.216721.116_Supplemental_Data_S4.xlsx]

## Sheet: readme
	This file contains hub genes specific to a predefined group of tissues.
	Here,
	Group1: skin-sun exposed and skin-not sun exposed
	Group2: adipose-subcutaneous, adipose-visceral and breast
	Group3: heart and skeletal muscle
	Group4: esophagus-mucosa and esophagus-muscularis
	Group5: artery-aorta and artery-tibial
	Group6: nerve-tibial and artery-tibial
	1st col - rank
	2nd col - hub
	3rd col - F-score

## Sheet: Group1 (TE-TE)
rank	hub	r
1	LYG2	0.994007559693925
2	FAM26D	0.99382203780544
3	MOGAT2	0.99372925119882
4	AWAT2	0.993357933579336
5	DSG4	0.992521466161942
6	AADACL3	0.992242334687846
7	BLMH	0.992141603024768
8	KRT82	0.990284075136486
9	KRT36	0.990097177232762
10	AC106876.2	0.990003702332469
11	LIPM	0.985685071574642
12	DGAT2L6	0.983701220080097
13	EDAR	0.983606557377049
14	TGM6	0.983038210624417
15	SPTSSB	0.982213869892663
16	LOR	0.981899608135846
17	KRT74	0.981139122315593
18	VAPB	0.980568011958147
19	CDSN	0.979805534779357
20	HAO2	0.979423868312757
21	KRT39	0.978277153558053
22	KRTAP26-1	0.977990072117636
23	KRTAP17-1	0.976552241605702
24	LY6G6D	0.976264189886481
25	ADCY8	0.974821495678316
26	POF1B	0.974180618409905
27	KRT26	0.972214373175097
28	KRTAP24-1	0.971148406562323
29	ABCA4	0.97026445522865
30	PLA2G2F	0.968912406689974
31	ALOXE3	0.967771330883264
32	PSORS1C2	0.965427360875545
33	FAR2	0.964707135016523
34	AWAT1	0.96411619517752
35	PNLDC1	0.961941137636331
36	ASPRV1	0.961516460356578
37	PRR9	0.95927515498331
38	BPIFC	0.958579881656805
39	KRTAP11-1	0.957883678731735
40	KRTAP16-1	0.954488837788637
41	KRTAP19-5	0.95428845232391
42	PM20D1	0.952079131854413
43	PSAPL1	0.951777137367915
44	KRTAP3-1	0.950769230769231
45	C1orf68	0.950567416810925
46	AADACL2	0.950006640873826
47	BCAN	0.948139579718527
48	LCE1F	0.947835309999036
49	TCHH	0.947733847637416
50	KRTAP8-1	0.94692144373673
51	SPRR4	0.945256626212738
52	KRTAP4-1	0.943045331266951
53	ACTBL2	0.942942942942943
54	KRT75	0.942635658914729
55	KRTAP19-1	0.941096555070354
56	GPR143	0.940479658219245
57	LY6G6C	0.940256340953384
58	TMPRSS11F	0.939881295011178
59	GPRC5D	0.939408741234989
60	LCE6A	0.939346811819596
61	KRT32	0.938861195844232
62	OTUB2	0.938824737402879
63	KRTAP29-1	0.937901498929336
64	TRPM1	0.936659520561294
65	IL37	0.934166829458879
66	DCT	0.933854421104055
67	TMEM211	0.931139190909981
68	LHX2	0.930825004899079
69	PON3	0.930033466688753
70	NEU2	0.927988996954514
71	FABP9	0.927567567567568
72	DLX4	0.923971994872301
73	UPB1	0.920538288405756
74	SLC24A5	0.920025074217893
75	GJB4	0.918656059208104
76	LIPK	0.917889726299088
77	KRT27	0.917782406029951
78	EPHX3	0.915351272496491
79	KRT40	0.912714228776405
80	KRTAP12-3	0.912172265975476
81	NIPAL4	0.91165023614861
82	XKRX	0.908958891867739
83	LCE2A	0.907817035331799
84	LCE5A	0.907598358194013
85	WDR47	0.907494065533845
86	PKLR	0.904857486953031
87	CBLN2	0.90351268563233
88	GPR115	0.901660795168596
89	LGALSL	0.901164727198552
90	C1orf74	0.900812382912627
91	HEPHL1	0.900366132111273
92	HSD17B2	0.899913094413158
93	BEST2	0.898667743237788
94	ALKBH1	0.897797312488403
95	CAPN12	0.896451803375949
96	PADI3	0.895083870532515
97	ELOVL4	0.890605759841678
98	ATP6V0A4	0.889972976795616
99	CFTR	0.888881620913218
100	SERPINB8	0.888728834731872
101	OXGR1	0.888069185460568
102	ATP7A	0.887900976347073
103	HACL1	0.887206196343757
104	PLA2G2E	0.886757804529688
105	RP11-324D17.1	0.886189649892824
106	POLR3H	0.885274632824587
107	KRT84	0.884367651569369
108	GRIA2	0.884208628992434
109	GLTPD2	0.880131362889984
110	ALOX12B	0.879609791375089
111	TMEM164	0.879587432784975
112	SERPINA12	0.87932628119544
113	SERPINB12	0.878802168947029
114	VSIG8	0.876501357358933
115	MATN4	0.876325816084852
116	SP6	0.874396223097938
117	C2CD2	0.873736021081877
118	SDR9C7	0.871962253989789
119	IL36RN	0.870268837711718
120	BCKDK	0.870175881939175
121	GPR111	0.866638969671791
122	XCR1	0.86475239284228
123	AC012313.1	0.86455679734418
124	MARK4	0.864444741076868
125	HOXC13	0.860118246152693
126	AXDND1	0.859889248772333
127	PMEL	0.859620745431394
128	SLC39A2	0.859037142780653
129	KRT73	0.857621440536013
130	GRB14	0.856705289195555
131	CCL27	0.855704697986577
132	GAPDHS	0.85498426023085
133	TREX2	0.85406928325535
134	PRPS2	0.851224971868286
135	IGFL4	0.850642511059617
136	FOXI1	0.850369435187741
137	KLHL18	0.849673202614379
138	CDC34	0.849570199718642
139	SERPINB7	0.848312751532987
140	ABCA12	0.847722876255714
141	TRIM35	0.84714051638284
142	GSKIP	0.847010938928743
143	AC007461.1	0.840795688974817
144	SLC6A17	0.840397083085508
145	MARC2	0.839704407632559
146	CERS3	0.839449565008785
147	TRIM2	0.839167230826838
148	IDE	0.838765280629278
149	COCH	0.83703682120866
150	CLEC12B	0.836590289532863
151	MINPP1	0.835067572794524
152	TYRP1	0.834495040858835
153	ATP12A	0.834379171056938
154	LSM14B	0.834334318402109
155	AOC1	0.833787055908662
156	SPAG1	0.832345839559421
157	USP16	0.830122678565096
158	SLC13A2	0.828329440960403
159	C2orf72	0.826033662030238
160	SHANK2	0.825489555905161
161	SLC46A2	0.823949367600236
162	NLRP10	0.823737960061741
163	VSIG10L	0.822886415432099
164	GJB3	0.821915210286006
165	ZNF740	0.821453301122663
166	CARD18	0.821264509968155
167	BAI1	0.81792006155891
168	TMPRSS11E	0.816417683833303
169	ESRRG	0.815872416587268
170	KRTAP6-1	0.81584373304395
171	DPEP1	0.814864587218498
172	C16orf80	0.814270349240805
173	MOGAT1	0.813537106228601
174	TRIM55	0.813172823276122
175	TRIM62	0.810862577387165
176	IL1F10	0.810032715376227
177	SERPINB13	0.808510115149198
178	GJB5	0.807756641549709
179	LAMP5	0.806118450401306
180	S100A3	0.80495298248285
181	MID2	0.804088957059823
182	MAP3K9	0.802488361438652
183	KPRP	0.79941052553183
184	CYP4F22	0.79733039539746
185	HN1L	0.796888820746652
186	FAT2	0.79643996463266
187	RPP40	0.795197867274022
188	SUSD4	0.794788816636498
189	ATP13A5	0.79396026883835
190	SLC9A2	0.793053865722818
191	ADSL	0.792715803594368
192	RSPO4	0.792032933703263
193	TRIT1	0.791926870084284
194	MAP6	0.78924894438949
195	LIPN	0.789118913552704
196	EPN3	0.788982517959575
197	CTSH	0.788767095581383
198	SLC22A31	0.786764333815867
199	KRTAP20-2	0.786746720035579
200	CCSAP	0.786220354372454
201	DNASE1L2	0.785319235117122
202	KRT77	0.784853631329829
203	ASAP2	0.783658515829739
204	RNF39	0.782440776718727
205	POLG	0.782058643360441
206	GALNS	0.781004224032802
207	FAM81A	0.780645467381836
208	CD1A	0.77990419392801
209	SGPP1	0.779803689460355
210	KLHL36	0.779409282392257
211	PPME1	0.779248265410204
212	GLTSCR1	0.779085346454411
213	ATAD2B	0.778869059124239
214	SERTAD2	0.778801585329165
215	GRHL3	0.778266452128118
216	EN1	0.77781983119654
217	MRGPRX2	0.777001420335247
218	WFDC5	0.776590806483256
219	PTPN21	0.776234093069136
220	RORA	0.775472989993393
221	JMJD8	0.77519755681033
222	IL36B	0.774947257576067
223	ACAD9	0.774587181042765
224	RNF111	0.77454003584827
225	SPIRE1	0.7739957861372
226	TMEM125	0.771982381503206
227	STK32A	0.77143625037539
228	CECR2	0.771125632707429
229	TMPRSS13	0.771029344506789
230	RAB27B	0.770369921462761
231	HLCS	0.769924473001916
232	NPR2	0.769182578616236
233	CCL17	0.766758510425993
234	FGFBP1	0.766360109377803
235	MBOAT2	0.766086572532889
236	IL36G	0.765567338800526
237	DLX5	0.76515937292621
238	TNN	0.765042258992071
239	DLX2	0.764993403931207
240	KCTD14	0.764788486629354
241	ESYT3	0.764768078451687
242	RGS20	0.762960142072341
243	ZNF227	0.76200879002599
244	OCA2	0.761831519169963
245	GRHL1	0.76145769405248
246	KY	0.760269552036958
247	LEPREL1	0.759802595167742
248	ARC	0.759734302537221
249	TTC6	0.7591985428051
250	DLX1	0.75905842185021
251	EFCAB4B	0.758265126173175
252	PHACTR3	0.756082858217517
253	ATP6V1C2	0.755966558661173
254	SLC25A39	0.754802814165017
255	MOSPD1	0.754451308394827
256	MMP27	0.754381094889587
257	VAX2	0.754335990626596
258	CTNND2	0.754321978984686
259	PRSS53	0.751159827419768
260	FGFR3	0.751127377490651
261	SPINK5	0.749632742835053
262	SCAF4	0.749388200379267
263	ASB13	0.749228027119605
264	CNTD1	0.748987098532245
265	SDR16C5	0.748744079099732
266	CD1E	0.747540546780498
267	WDR75	0.74719667989965
268	CLDND1	0.746767520688218
269	FBXO8	0.746521278346084
270	OVOL1	0.745247139618248
271	ATP2C2	0.745228385618799
272	MANEAL	0.744135333021247
273	TMEM63C	0.742810953799828
274	ATP6V1B1	0.742052296363511
275	SPTLC3	0.740923564352528
276	RNASE7	0.740460731519742
277	CLSTN3	0.739068489403499
278	ATXN2	0.738926786269636
279	DLX3	0.738755663781361
280	OVOL2	0.737287463385558
281	PDCD2L	0.736296546860052
282	HSPA14	0.736232012827107
283	FOXE1	0.736182690559503
284	ACSM3	0.735235349112892
285	LCE4A	0.735133881998377
286	DTNB	0.732869586035415
287	CD207	0.732643872994519
288	RAPGEF4	0.731520133563109
289	RNF40	0.730413146030634
290	COL11A1	0.730086707528348
291	SGMS1	0.730012442291152
292	NGEF	0.729983593098066
293	FOXN1	0.729488859097657
294	RNF139	0.72922916275894
295	VAC14	0.728229377821954
296	IKZF2	0.728005359950022
297	ZDHHC23	0.725925587243527
298	STARD5	0.725125296499623
299	ATP10B	0.724936185413184
300	FAM26E	0.723863178219737
301	RTN4RL1	0.722461778828778
302	WFDC6	0.721777567771391
303	ODF3L1	0.72143812012515
304	HGD	0.721402124783677
305	DZIP1L	0.720960024796499
306	TCHHL1	0.720750293083236
307	SRGAP3	0.719465313863829
308	SCNN1G	0.719149847207957
309	PAPPA	0.718952642578704
310	MFSD7	0.717468832137608
311	SLC6A15	0.717232641517387
312	ACAA1	0.7160792620115
313	SUV420H2	0.715903214114198
314	RIN2	0.714758148037216
315	GGH	0.714698843841478
316	CBR4	0.713794208320059
317	EML1	0.71315612886142
318	PGLYRP3	0.712721939551747
319	GDPD2	0.711536190813555
320	SLC25A35	0.711100304752096
321	CD58	0.710870432378376
322	C12orf56	0.710647483492086
323	UBE2J1	0.709567690670757
324	YBX2	0.708510788080163
325	DDX5	0.708094168786544
326	LRRC26	0.707945830903252
327	KRT78	0.707565341466739
328	FBF1	0.706478369922698
329	CLEC4F	0.705438638098629
330	ELOVL3	0.705375717940943
331	LAMA1	0.703509248696687
332	HSD11B2	0.70347972421517
333	CTSV	0.702968253205508
334	RAB40C	0.702480133819018
335	B3GALT5	0.70243943769151
336	SOX5	0.701759446867208
337	ARFGAP3	0.701334119694751
338	ZNF134	0.701157988178251
339	CYP39A1	0.70096637653128
340	C9orf152	0.700826303682341
341	GALNT1	0.700613738968586
342	ATG9B	0.700525287015831
343	NCLN	0.699988535814078
344	SEMA4G	0.699261375970054
345	ERAL1	0.699135214303934
346	PLA2G4D	0.698088385008081
347	TMEM56	0.697101073634369
348	PLEKHF2	0.69704235296838
349	SLC10A3	0.696924808771553
350	TCEAL8	0.696577562736351
351	BARX2	0.69597877996212
352	CALML3	0.695975483239998
353	GPR87	0.694417151544595
354	ADNP2	0.694026997600743
355	C22orf23	0.693999851836464
356	PDCD10	0.693807389964683
357	DNAL4	0.693777014392988
358	CHIC2	0.69376806211221
359	CHST2	0.693753743480072
360	LGR5	0.693393589281146
361	URI1	0.693330361505725
362	KHNYN	0.693203470123519
363	SETD6	0.693169687998928
364	FAM69C	0.692704526750175
365	KCNK1	0.691595754252129
366	PCP4L1	0.691486723048752
367	SLC9A8	0.691172525838181
368	NLRX1	0.691161364749759
369	KCTD4	0.690987580241185
370	AGPAT3	0.690859353645237
371	STXBP5	0.690663793328592
372	JARID2	0.688994930807072
373	FOXQ1	0.68864761848978
374	KLF3	0.688246278562897
375	SHROOM2	0.68795860809358
376	NDFIP2	0.687205022043331
377	BCL2L10	0.687041270605222
378	LANCL2	0.686868583421426
379	ADTRP	0.686476829806615
380	ALAS1	0.685851599717069
381	PDZRN3	0.685655616972094
382	C2orf82	0.68511216352495
383	PLEKHN1	0.684638703949122
384	PNLIPRP3	0.684558823740268
385	GTF2F2	0.684100903885545
386	DNAJC6	0.684079409029728
387	USH1G	0.684045781530991
388	SH3TC2	0.683683040192179
389	RAB38	0.683301119318863
390	HS3ST6	0.683113809084809
391	NOTUM	0.682964059164284
392	OLIG1	0.682878227992999
393	SLC12A7	0.681045072832017
394	PMVK	0.680241229662201
395	ZNF711	0.680125791303449
396	NPM3	0.679472922537893
397	CHI3L2	0.678873786387261
398	SRP54	0.677410121036411
399	C5orf46	0.677311186905244
400	SLURP1	0.67697982887743
401	SENP3	0.676667777546408
402	MCOLN3	0.676461579500579
403	ALOX12	0.675852862889374
404	PIP4K2B	0.675813712727549
405	FAM110A	0.675619590514368
406	LGALS2	0.675562498235576
407	BIRC7	0.675271505072229
408	LDLRAD4	0.675017151389273
409	SLC38A11	0.673814701242449
410	FBXO46	0.673376718834255
411	FAM57A	0.671700999571506
412	SFMBT2	0.671158407931619
413	LRRC15	0.670526396768678
414	BEAN1	0.670416760234181
415	SLC1A6	0.669754967694746
416	HOXC12	0.669734877449146
417	PPM1D	0.669679669310069
418	SEMA5B	0.669531926900169
419	INSIG2	0.66897419617141
420	NAPB	0.668398134326986
421	NAPEPLD	0.668172924882001
422	ACAD8	0.668121516881675
423	MAP4K3	0.668117595286166
424	PPP1R10	0.667152757313734
425	SLC46A3	0.666640389322526
426	TPRG1	0.666391663507561
427	DGKQ	0.665460180816986
428	MEX3C	0.665334019190992
429	E4F1	0.664948994870537
430	RAB12	0.66436730871417
431	BHLHE22	0.664306721288113
432	RDH12	0.663794563399949
433	HIST1H3A	0.663400293973542
434	EIF6	0.663273313086168
435	SLC30A1	0.662816152091913
436	CLCA4	0.66272767829211
437	EAF1	0.662692251290795
438	TMPRSS5	0.662117145005828
439	PYDC1	0.662089259440902
440	ATP11B	0.662071264974842
441	NAA20	0.661856361668709
442	EED	0.661346069672628
443	DSG1	0.660920122952829
444	FAM126A	0.659980492205339
445	ISL2	0.659484719304753
446	GABRA4	0.659317166816559
447	TSTA3	0.65905143201089
448	TTLL4	0.658842190332761
449	PITPNM3	0.658256711756342
450	TSSK4	0.658235475671182
451	RSRC2	0.657221200685353
452	CD70	0.656856588028964
453	TXLNA	0.656838373349427
454	CHRM1	0.656646813822055
455	ASCL2	0.656640594605554
456	CNOT2	0.656161296481589
457	PIRT	0.655269704266259
458	MYEOV	0.655069217542583
459	ZSWIM4	0.654374624816071
460	CDHR1	0.654346217959671
461	KCNK5	0.654134897101502
462	HOXD10	0.654093539640395
463	SPATA5L1	0.654002713704206
464	COL6A5	0.653121988584247
465	GAL	0.652405391520124
466	ZNF217	0.651717119428081
467	SCPEP1	0.651231950794997
468	ACOT8	0.650918224035876
469	CRCT1	0.650519679309202
470	PSKH1	0.649800739877301
471	TRA2B	0.648956096099631
472	TGM3	0.648826004865057
473	SCFD1	0.648746182441817
474	RFX1	0.648698692490396
475	TFAP4	0.646536802954574
476	ISOC1	0.645092779792404
477	ACVR2A	0.645055513394203
478	DARS	0.64468429413768
479	GATA3	0.644454417877212
480	CPOX	0.644319176762636
481	ZBED2	0.644137658805656
482	RAB18	0.643482995637626
483	RHOD	0.643394265329001
484	FAM132A	0.643209696599981
485	ENHO	0.643061087066466
486	KNSTRN	0.642626369357611
487	NXPH4	0.642013764093553
488	CRAT	0.641524307610808
489	RNF43	0.641053688136771
490	NTN4	0.6405364521469
491	EMID1	0.640173142482987
492	TICAM1	0.639737746758693
493	RAC3	0.638926666418528
494	RDH11	0.638595446244081
495	MAPKAPK3	0.63768038686921
496	METTL7B	0.637001492102278
497	KLK6	0.635929736873337
498	PPOX	0.635785317648443
499	ZMYND8	0.63561145902882
500	TST	0.63477863711386
501	UCHL3	0.63415073694167
502	MASP2	0.633534252727121
503	PLEKHG4B	0.633046399306305
504	FGF13	0.632969668535889
505	CPZ	0.632824048563453
506	PCTP	0.632526005430618
507	CRISPLD1	0.630742068974283
508	TWISTNB	0.630350205712668
509	CLDN7	0.629689962583765
510	EPT1	0.629532155760158
511	POPDC2	0.629486714669192
512	SERPINB2	0.629189515709309
513	SST	0.628824111102128
514	ENPP5	0.628759736487091
515	PIP5K1B	0.62747831084786
516	LEF1	0.627376200149731
517	AMMECR1	0.626995178897191
518	LAMC3	0.626972026107138
519	WASF1	0.626023160299972
520	ABHD17C	0.625837503121513
521	PGLYRP4	0.625519586849729
522	ZBTB42	0.625471943971614
523	ETV1	0.625454002927556
524	IRX6	0.625427301992813
525	B4GALNT2	0.624403392050684
526	COASY	0.624267400760188
527	SRPK1	0.623602019681872
528	APPL2	0.623206147027951
529	MAP2K7	0.622200687606118
530	MUCL1	0.622054477176699
531	PEX3	0.622048238413941
532	MROH6	0.621774907288301
533	BBS2	0.62166041512958
534	MECP2	0.621639193046337
535	TMEM238	0.62160425522102
536	CORIN	0.621509047785424
537	ROBO2	0.62139152678837
538	PCSK2	0.620891637835941
539	PET112	0.620712580382987
540	BCKDHA	0.620202596687983
541	XRN2	0.619990093059907
542	DKK1	0.619354024422777
543	VPS36	0.619072663831145
544	EVA1A	0.618984018087788
545	ALX4	0.618932064746639
546	SGCG	0.618570354253804
547	DLG2	0.618230307207025
548	COMMD8	0.618204271066112
549	ASIP	0.618192273470799
550	PPAP2C	0.618071086043087
551	SGK2	0.61801252403721
552	PTCH2	0.617812106351151
553	ENPP4	0.617787119826587
554	HTATSF1	0.617765982735643
555	EIF2B2	0.617753471662776
556	TBX15	0.616902958959197
557	STRN	0.616902137740955
558	SP2	0.616802507793262
559	CNOT1	0.616782250820628
560	CMTR2	0.616763110041214
561	ABHD12	0.616696947026339
562	EARS2	0.616497112915294
563	CWC15	0.615976135580771
564	CLN6	0.615508811064384
565	XYLT1	0.615322862214647
566	ACVR1B	0.614886694513896
567	CCNF	0.614395323970329
568	HIRIP3	0.613823003614389
569	NANS	0.613761159989373
570	NPTX2	0.613578350658734
571	WNT4	0.613206845869343
572	AP3D1	0.611991675071852
573	HSBP1	0.611663805515273
574	UBASH3B	0.610425332157994
575	ACADM	0.610422635531556
576	MLST8	0.610270023774344
577	PIAS4	0.609722524371673
578	POU3F1	0.60953114005627
579	DIRAS3	0.608873857645771
580	SLC27A6	0.608631849352046
581	GALNT7	0.608410939446616
582	CD1C	0.60786859030652
583	KIF12	0.607654711514203
584	FAM49A	0.607151242299465
585	B3GNT4	0.606757755143824
586	SUV39H1	0.606301828898819
587	ZG16B	0.606297460698636
588	SCGB3A1	0.606282938567647
589	FAM83H	0.606228066227895
590	ASTL	0.606029637199796
591	NR3C2	0.606005694612877
592	FOXA1	0.605820629306325
593	GNAI3	0.605726193239094
594	MBTPS1	0.605603847429054
595	FOXP2	0.605519547986697
596	JMJD4	0.605442892673726
597	SMAD5	0.605079434942123
598	CASP14	0.60460358056266
599	ZACN	0.604481372035107
600	HIST1H1E	0.604457735064857
601	LYPD2	0.604145215125023
602	POLR3B	0.60409767593122
603	PPP2R1B	0.603741200269355
604	NOD2	0.603310529490032
605	ZNF512B	0.602666555283722
606	CSTF2	0.601853130590965
607	PIP	0.601802725486871
608	VAV3	0.601066961459618
609	TNF	0.601059795840994
610	DNER	0.600847116825871
611	MFI2	0.600778320415138
612	C11orf35	0.60037239421052
613	PLA2G3	0.599763431070903
614	RAP1GAP	0.599662157788023
615	HPRT1	0.599459126430818
616	ZC3H12C	0.599156900466719
617	ADORA1	0.599079501134409
618	R3HCC1L	0.599017768825617
619	ANXA9	0.598880226257959
620	PTPRZ1	0.598404713657185
621	MIER2	0.598274143087977
622	LIPG	0.598004402042878
623	RALGAPB	0.597962286125522
624	ATG2B	0.597658149157619
625	PMM2	0.597554985565751
626	MRM1	0.597454786583521
627	HPGD	0.597095717147974
628	SPINK7	0.596435468470957
629	SLC25A11	0.596341927593502
630	SMOX	0.596206762437732
631	SLC2A12	0.596159962000048
632	FAM174A	0.595898023587454
633	ATP5SL	0.595684949491867
634	ANAPC7	0.595476059238103
635	LDLRAD3	0.595243518052214
636	GJB2	0.595232542045592
637	EDN3	0.594898341590831
638	TBC1D13	0.59461344385577
639	C2CD4D	0.594538897475528
640	PCP4	0.594505447718504
641	RIPK2	0.594086321886371
642	FKBPL	0.59390873013064
643	DNMT1	0.593882238343282
644	CDH6	0.593814329066763
645	HPSE2	0.593716225684183
646	TIAM2	0.59286924225455
647	PDRG1	0.592804648362511
648	IKZF5	0.59269532607229
649	SYNE2	0.592102354996276
650	VPS16	0.591984359629788
651	GAB3	0.591897522686551
652	HSD17B14	0.591764770002094
653	GDPD3	0.591326406394035
654	TCF12	0.591253906960786
655	ZNF664	0.59116292331241
656	FREM1	0.591100135302108
657	RCL1	0.590547182221087
658	HLF	0.590407086865222
659	ENOPH1	0.590243266397611
660	KIAA1147	0.589700845875097
661	EMC9	0.589588270758179
662	BTBD3	0.589231761428621
663	ING3	0.58910631780819
664	ORC5	0.589006193556024
665	BAMBI	0.588673857956986
666	CHD8	0.588597647144642
667	ARIH1	0.588377081817636
668	DHRS9	0.588046582261731
669	DUS3L	0.587934499930599
670	GREM1	0.587744897203931
671	C1orf170	0.587554102747957
672	CST6	0.587514116282103
673	CHMP6	0.587132375791776
674	ATP2B1	0.586892960462874
675	ZC3H15	0.586801989991305
676	KIF21A	0.586782931282222
677	TMEM99	0.586689941782956
678	SERPINA5	0.586598702761939
679	TET3	0.585821325697944
680	CIB1	0.58556938706778
681	ERMAP	0.585497095612197
682	THAP8	0.58549703403753
683	CGA	0.585493071580924
684	NDNF	0.585223145754288
685	SPTBN5	0.585193302632059
686	CLSTN2	0.585050085171027
687	DENND4C	0.585020885392335
688	CRABP1	0.584806980748798
689	CHI3L1	0.584631189909463
690	ZCCHC2	0.583925267312646
691	RAB33A	0.583569545471883
692	CAPN8	0.583564165356925
693	P2RY11	0.583154672485036
694	FAM102B	0.582848547583984
695	USP38	0.582724315353628
696	CDK14	0.582553374737446
697	C11orf49	0.5824693849891
698	FGF11	0.58217286288411
699	SMPD3	0.581826417032872
700	TTC33	0.581748385180105
701	LGI3	0.581583282581953
702	WDR4	0.581326384494021
703	SOSTDC1	0.581009633337093
704	MPHOSPH6	0.580896314452748
705	KLC1	0.580707845929003
706	USP43	0.580532059368291
707	EIF4EBP3	0.580324353687155
708	MAPK13	0.580303222053789
709	TANK	0.58020702497979
710	KIAA0100	0.580117377744616
711	HOXD9	0.580046532680455
712	MTR	0.579328102510826
713	FAM109B	0.579213547281148
714	HAND2	0.579009264634334
715	SPATA13	0.57889606916659
716	FBXL20	0.578831896159929
717	PLEKHG6	0.578782489335297
718	SLC22A5	0.578558140037735
719	FARS2	0.578437477021339
720	NMU	0.578241042345277
721	RNF128	0.578223067331952
722	PRKD2	0.578185798613015
723	FZD10	0.577907834902879
724	GCSAM	0.577809401654321
725	NAA10	0.577677602736742
726	CDK17	0.576908718645805
727	AQP5	0.576633738091412
728	KLHL13	0.576192166378061
729	CADPS2	0.576075077139708
730	PRTFDC1	0.575928586231252
731	SP5	0.575448692714548
732	LAS1L	0.57544205163612
733	SLC25A46	0.575136230703434
734	MOB1B	0.57508487855837
735	DUOXA1	0.574839994597754
736	HAS3	0.574651805771365
737	ROBO1	0.574335463530206
738	SLC39A3	0.573600112710454
739	FBXO41	0.573536179835711
740	ELAC2	0.573447666272601
741	LYSMD1	0.572844184985165
742	KRT79	0.572535887934083
743	CENPW	0.572395459176838
744	CXCL12	0.572113049198432
745	SLC9B2	0.571968330174922
746	SCARB1	0.571204223899773
747	FAM117A	0.57048697315868
748	PITPNA	0.570408696609479
749	PPP2R4	0.569957981220157
750	PGBD5	0.569687142906808
751	ADPRH	0.569644952175869
752	SLC2A9	0.569448770626928
753	SEPHS2	0.569305252966179
754	WFDC3	0.569293300118002
755	CNOT3	0.56929323913891
756	SCAPER	0.569105691056911
757	MPDZ	0.568369082790342
758	CHKA	0.568082176286648
759	POLDIP2	0.568030426036823
760	UHMK1	0.567870034180441
761	APEX1	0.567397596361698
762	C1orf115	0.567316559606763
763	ZEB2	0.566745311908675
764	TMC4	0.566215492256611
765	S100A2	0.566088186100889
766	ASNSD1	0.565555633242978
767	RASL10B	0.565339966364332
768	FAM46A	0.565142564398891
769	CRYM	0.564799943357106
770	MMP17	0.564363503881077
771	PCSK1N	0.56431680001521
772	MED30	0.564253286159889
773	C3orf38	0.564158270094971
774	RAPGEFL1	0.564134178417886
775	CADPS	0.564058189733309
776	C4orf33	0.56376700193079
777	C1orf131	0.563583915012092
778	TMEM79	0.563157308779132
779	IP6K1	0.562890408964593
780	RIOK1	0.562602233217049
781	IRX3	0.562199610412128
782	GINS3	0.561736612795477
783	C11orf21	0.56165440615741
784	TMEM86A	0.56151209819905
785	SOCS7	0.561446505244102
786	GID8	0.561334721810732
787	STK17A	0.561197093876655
788	ANAPC5	0.561138449525277
789	APOA1	0.56087358907302
790	XAB2	0.560619767510292
791	PMFBP1	0.560612056456932
792	PRKAR1A	0.560587924461151
793	SLC18A2	0.560164906650214
794	KIAA1244	0.560142895721656
795	CCDC150	0.559480046080683
796	TRIM27	0.559374678349259
797	PDK3	0.559327749870263
798	ZNF704	0.55932741362359
799	JAZF1	0.559269537820629
800	VSNL1	0.559234633962612
801	KRT80	0.559196419065248
802	FBXO33	0.55903305702633
803	MYO18B	0.558955259542922
804	ADORA2B	0.558542923298883
805	PAPD4	0.558501601476685
806	KRTAP19-7	0.558330030387105
807	FERMT1	0.558231544622955
808	AIM1L	0.557903538957047
809	MTA1	0.557899348857348
810	RASD2	0.557457771010265
811	SOGA2	0.55722063086273
812	APBA3	0.557068092139481
813	SCAF1	0.556981098424693
814	PPP1R3E	0.556924894571246
815	HMGCS2	0.556885242164521
816	FBXO34	0.556465902253056
817	DGCR2	0.556185598324779
818	SMIM22	0.555982117760076
819	MBD1	0.555805876758299
820	HOXA9	0.554819060808038
821	SLC39A10	0.554730013157346
822	CRNN	0.554716941598747
823	TNFSF12	0.554651104992618
824	ITPR2	0.554629988971387
825	CASK	0.55431902490726
826	TESC	0.55347782514571
827	CAPNS1	0.553192920323279
828	KCNN4	0.553037824703837
829	C16orf59	0.552858159235348
830	PAX3	0.552695601592561
831	SUCO	0.552549475432488
832	ATL1	0.552455660116121
833	LRIT2	0.552401167418413
834	B9D1	0.552173726394601
835	GRAMD4	0.551920563101635
836	PARP10	0.551467165138294
837	hsa-mir-1199	0.551274673858196
838	BNC2	0.550895819847645
839	C2CD2L	0.550852778607868
840	ARMC6	0.550851069652359
841	DCAKD	0.550789413192011
842	BTBD2	0.550755865266912
843	UBL3	0.550446133523661
844	NAT9	0.550221496536724
845	TJP2	0.550086345576252
846	FAM71A	0.549900332225914
847	OSBPL1A	0.549541594587093
848	FZD7	0.549541520322886
849	KCTD13	0.549514510698585
850	TAOK1	0.549438592123473
851	UGP2	0.549119797399673
852	DTL	0.549108638018239
853	GNAI1	0.54908342055061
854	FGG	0.548970705450697
855	TMEM14A	0.548573079211314
856	BBS4	0.54844917568321
857	NKD1	0.548446867788672
858	GNG12	0.548344279744624
859	ADAMTS10	0.548165434302964
860	NCALD	0.548148634514259
861	CYP27B1	0.548122371319022
862	TF	0.54776448556299
863	WNT10A	0.54773162767883
864	RNF19A	0.547185824685153
865	PRPF8	0.547058489027717
866	LYPD6	0.546841226341818
867	GRP	0.546672747439214
868	DEGS2	0.546310655449922
869	NPW	0.54622968292033
870	RIN1	0.546183895474099
871	ZFHX3	0.546014019871053
872	CDH13	0.545882373415833
873	GDA	0.545842217484009
874	MIER1	0.545385949065871
875	DCST2	0.54533767596331
876	LIN7B	0.545267889639974
877	OARD1	0.545129894003662
878	PLA2G4A	0.54509479431898
879	SARS2	0.545055025648879
880	TMEM139	0.545017229894414
881	HOXC10	0.544924611253243
882	ZBTB11	0.544843357281669
883	CSNK2A2	0.544411743144361
884	SLC40A1	0.544268289966452
885	MYL4	0.543739118418538
886	PDE9A	0.543731093158885
887	CDC25B	0.543342367475243
888	SEPT11	0.543096451400028
889	HR	0.542734613879665
890	CMA1	0.542712078554966
891	CTDSPL2	0.542638334147299
892	RPA1	0.542621170011766
893	CCL20	0.542562677572177
894	EPHA1	0.542538032392678
895	ZNF75A	0.542268972844498
896	AMOTL1	0.542235603202276
897	OTX1	0.542106199029184
898	ACSL5	0.541917483188264
899	GPSM1	0.541446096759284
900	CLDN23	0.541314817858972
901	AMT	0.54129700555906
902	CPEB4	0.5411383323707
903	RORC	0.541133926187323
904	UBE2QL1	0.540607246381422
905	CHRD	0.54046892623172
906	NNAT	0.540206694568816
907	CCDC59	0.539915510942458
908	ALDH9A1	0.539821702327648
909	CNIH1	0.539677109500081
910	ANXA5	0.5395272038861
911	VSIG2	0.539360091077373
912	CTU2	0.539357270364366
913	CYGB	0.539355523433348
914	KLK12	0.539280456070315
915	RAE1	0.539116946795044
916	ZNF248	0.539041304294381
917	KIF5B	0.538892860890764
918	CENPN	0.538673862540441
919	FABP1	0.538571480448689
920	KIF5C	0.538455287346732
921	DEPDC1B	0.538229486487943
922	RPS6KB2	0.538090318706911
923	GLMN	0.53794280432381
924	ZNF410	0.53787471115191
925	TMEM54	0.53771435026426
926	FETUB	0.537657464486733
927	UBXN6	0.537216624734005
928	POMT2	0.537210460181607
929	EFTUD2	0.537036962091796
930	FAM13A	0.536655877825242
931	TRPV4	0.536597251496377
932	ADRA2A	0.536491486598866
933	SLC12A2	0.536435161357221
934	WASL	0.536320044153499
935	HMOX1	0.535959243028867
936	LAMTOR4	0.535883488377325
937	ELOVL1	0.53537763008127
938	RSF1	0.535288831369279
939	EXTL1	0.53482713751412
940	MFSD8	0.534374991676775
941	LYNX1	0.534281835939685
942	PPIL4	0.534121440085975
943	DIO3	0.534021666205026
944	ZNF653	0.53397396062631
945	LSM6	0.533934584173462
946	SHOX2	0.533874022942817
947	INO80	0.533809555801777
948	PLCB1	0.533735248101359
949	ZNF367	0.533735111786741
950	EPC1	0.533552986741355
951	TEC	0.533530439457062
952	FAAH2	0.533436467232649
953	DCAF5	0.533382429492513
954	NR1H3	0.533362396830025
955	TLN2	0.533229715689878
956	FAM107B	0.533224937709937
957	PVRL4	0.533116518813713
958	EPC2	0.533022872731046
959	SLC6A1	0.533016002613104
960	ARHGAP17	0.533015421644484
961	METTL9	0.532892363870111
962	SLC4A11	0.532776127212187
963	HSPBP1	0.532679264782498
964	ARMC7	0.532678490314129
965	BTBD1	0.532566839463288
966	AES	0.532508356945482
967	AMACR	0.532474532358775
968	BEX4	0.532392105722021
969	LAMB3	0.532387838297016
970	HLX	0.532306081227176
971	DFNA5	0.532271486108014
972	TJP3	0.53217645626991
973	MLF1	0.53167632300919
974	FBXO4	0.53156497923194
975	TBC1D10B	0.531509838892433
976	WASF3	0.531402111792844
977	ARHGAP32	0.531282091567289
978	HMGXB4	0.531270605704377
979	RAP1GAP2	0.531251667648144
980	NBEA	0.530945322392246
981	DCTPP1	0.530848593126426
982	KRT2	0.530553114583596
983	NPAS1	0.530378271836664
984	MASP1	0.53025844843707
985	DCD	0.530198093572716
986	PLEKHA8	0.529872235907421
987	NPY1R	0.529837094793492
988	IRF2	0.529669821757361
989	SYT8	0.529364502556892
990	PJA1	0.529081018473517
991	FAM219B	0.528839688559335
992	MDK	0.528758436846537
993	HHAT	0.528647787011974
994	ZNF335	0.528639552565648
995	MRPS23	0.528469906773025
996	TBX18	0.528237233954656
997	TLE4	0.527958299411801
998	FMN1	0.527221652902526
999	UPF1	0.526821092927923
1000	RSPO1	0.526429839342512
1001	AKAP9	0.526100757194413
1002	PRSS12	0.525827223374363
1003	EME2	0.52562298848868
1004	PEPD	0.525619023969058
1005	PATZ1	0.525586827415523
1006	LRRCC1	0.525570516051547
1007	CDK12	0.525480050118692
1008	TMX3	0.525369729760801
1009	LRP4	0.525250478187045
1010	RUNX1T1	0.525230590639274
1011	ATXN7L1	0.525199280827564
1012	ELP2	0.525152905616991
1013	ZBTB39	0.524841262645005
1014	MYO7B	0.524517663800528
1015	PMAIP1	0.524511507233188
1016	VNN1	0.524502644319648
1017	COQ2	0.524420724814033
1018	SLC5A9	0.524101511654472
1019	DAAM1	0.523804064151519
1020	LHFPL2	0.523507986021849
1021	ANK2	0.523506853519258
1022	PPIG	0.523505213507397
1023	HES5	0.523344941268319
1024	NDEL1	0.523250741397659
1025	GLS	0.522977379216442
1026	PDE4A	0.522851267758085
1027	OTOP3	0.522333531753308
1028	PRR15L	0.522295049162844
1029	FGB	0.521868259779712
1030	LFNG	0.521813759974003
1031	FGF2	0.520799350935909
1032	CDR2L	0.520781416654257
1033	TRPS1	0.520436557947724
1034	PGLS	0.52037217510651
1035	GDE1	0.520318129200095
1036	NRCAM	0.519684940241992
1037	CLEC5A	0.519507539335246
1038	USP31	0.519490145664459
1039	TRAPPC6A	0.51937960983421
1040	HIST1H1D	0.519350916601119
1041	GART	0.519120918995965
1042	EIF4G3	0.519035244563879
1043	MFSD12	0.518988420660248
1044	FYN	0.518845305539212
1045	TFCP2L1	0.518765673487074
1046	CLTC	0.518293470785626
1047	SIPA1L1	0.518115699837902
1048	ABCC11	0.51791491482943
1049	EMC2	0.517839159999659
1050	IL22RA1	0.517772472849436
1051	CNFN	0.517177866459499
1052	CELSR1	0.516616009109889
1053	FAM150B	0.516338656456433
1054	EEA1	0.515878196047526
1055	ZNF121	0.515601278722814
1056	CCL19	0.515515832612178
1057	EYA2	0.515509454900241
1058	INHBA	0.515484321977948
1059	RYR1	0.51542383302349
1060	RHCG	0.514707747909882
1061	ARHGEF37	0.514701555062704
1062	NDN	0.513856089703516
1063	TNFRSF11A	0.513832049329324
1064	SYTL2	0.512895422247292
1065	CRISP3	0.512750094744123
1066	MTF2	0.512453716206333
1067	PSMA3	0.512333155358247
1068	SLC27A2	0.512310456674441
1069	RASL11A	0.512162229658858
1070	MMP7	0.511968466569736
1071	COL23A1	0.511666488385933
1072	ID4	0.511665288364134
1073	AADAC	0.511585119306602
1074	SAC3D1	0.511279311788698
1075	DUSP10	0.511003870951351
1076	FGF18	0.510996712659235
1077	ZNF414	0.510826238274734
1078	LSAMP	0.510648233549328
1079	PRM1	0.510567410503704
1080	FANCA	0.510422355744066
1081	MBNL3	0.51035338583515
1082	FAM110C	0.51022942965729
1083	RARB	0.510066099866209
1084	TCF7	0.5099572610834
1085	SEPT6	0.509832455019246
1086	EPB41L2	0.509716062396561
1087	SLC26A9	0.509193386619836
1088	LPHN2	0.508954159900606
1089	HABP4	0.508656755579465
1090	KLK1	0.50861550340931
1091	SCGB2A2	0.508585439882534
1092	ELL3	0.50856967332024
1093	EHF	0.508532109218384
1094	ZMYM2	0.508492338491176
1095	SLC38A5	0.507336660758858
1096	HAGH	0.507312349704291
1097	PDGFA	0.507010305671143
1098	RTKN2	0.506705917444939
1099	GJB6	0.506414844804027
1100	NEIL1	0.506362647151504
1101	ABHD4	0.506334826803337
1102	NLE1	0.50616324068585
1103	PARD3	0.506150519563433
1104	COL15A1	0.506059265199727
1105	TMEM150A	0.505949550962969
1106	RAPGEF6	0.505697576812198
1107	SMC4	0.505257918141179
1108	CCL13	0.505150404216692
1109	HIST1H4E	0.505104076680392
1110	TBL3	0.504984919601019
1111	KRT10	0.504941606204509
1112	GPATCH8	0.504888184577802
1113	ATP6V0D1	0.504875490933729
1114	ANO8	0.50482597573957
1115	SMARCAD1	0.504298601950946
1116	ADAMTS9	0.504211713868379
1117	ZFYVE19	0.504121635593425
1118	C15orf59	0.503835792949653
1119	TBC1D9	0.503803254554676
1120	TSR2	0.503645649311021
1121	OLFML2B	0.503385056086617
1122	ARHGEF19	0.503124462479368
1123	C11orf30	0.50309203127465
1124	CCNE1	0.50303886280277
1125	COL6A6	0.502962246171132
1126	TOM1L2	0.502850768204775
1127	DNMBP	0.502696056464569
1128	ZNF521	0.502682291605531
1129	RAB15	0.502357383089849
1130	METAP1D	0.502271745150445
1131	GNPAT	0.502113667728428
1132	PAK6	0.502005156665398
1133	WNT6	0.501831729514878
1134	PPP2R5B	0.501703914965955
1135	PRRT2	0.501628572970571
1136	CMTM8	0.501538071763585
1137	UCKL1	0.501501791649227
1138	SCGB2A1	0.501075326744413
1139	CDK5RAP1	0.500454147018582
1140	RPTN	0.50027167220026
1141	CDCA7	0.499762335188328
1142	C18orf21	0.499679666814928
1143	RBBP8NL	0.499586356631334
1144	AP001816.1	0.499490837603766
1145	KIAA0020	0.499394566743319
1146	AMN	0.499298741284423
1147	ZHX3	0.499264759944122
1148	C19orf26	0.499232368205698
1149	RHOV	0.499212873770254
1150	DACH1	0.499086208166034
1151	SH3KBP1	0.498406174692242
1152	ESF1	0.498166502864984
1153	PPIL1	0.497889498036731
1154	GOLIM4	0.497742489526634
1155	EGLN2	0.497474747522357
1156	OSR2	0.497468446052094
1157	CRAMP1L	0.49730833925231
1158	CTDP1	0.497181379593504
1159	RILPL2	0.49709832432455
1160	IL34	0.496968772331662
1161	NAALAD2	0.496561633121167
1162	SMTNL2	0.495889149153328
1163	CIT	0.495882069005432
1164	DKK2	0.495812438642523
1165	LGALS8	0.495615040970336
1166	IGF1R	0.495595664255968
1167	TNFRSF19	0.495566222290674
1168	SLC17A7	0.495564169227491
1169	RAPGEF2	0.495306706048584
1170	RMI2	0.495263384116871
1171	GKN1	0.494872788734902
1172	PLD2	0.494529221441686
1173	TBX3	0.494405367005814
1174	GABARAPL2	0.494378509231419
1175	NTM	0.494245756003231
1176	TMEM8B	0.494219217603638
1177	HIST1H2BG	0.494065886998555
1178	LANCL1	0.493976563948961
1179	SCO2	0.493816768233221
1180	PPP6R2	0.493659354188687
1181	WBP5	0.493616747931902
1182	ZNF628	0.493371913916653
1183	PPP1R3G	0.493023551924269
1184	PEBP4	0.492459201130528
1185	PDZK1IP1	0.492238260207183
1186	DLG5	0.491816319180731
1187	SLC7A6OS	0.491790564966022
1188	IGDCC4	0.491735251041317
1189	EPHB1	0.491546574528772
1190	ELMO2	0.491253145504968
1191	SAMM50	0.491165378324228
1192	SETBP1	0.491149952131751
1193	LIPF	0.491069871667624
1194	RBBP6	0.490663223671276
1195	SLC25A18	0.490629166581907
1196	ANKRD46	0.490506858812883
1197	PIGV	0.4904984112018
1198	BBC3	0.490439715439811
1199	F5	0.490438101712015
1200	ZCCHC14	0.490236461467864
1201	FGA	0.489861150691107
1202	DHRS13	0.489816691898856
1203	PADI1	0.489761553101964
1204	ARSA	0.489750623899468
1205	KIAA0195	0.489688750411885
1206	PTGER4	0.489656924660564
1207	YTHDC1	0.489536484351572
1208	TMEM184B	0.489075691934797
1209	C11orf80	0.488904416727955
1210	MSLN	0.488890120454964
1211	ITPR1	0.488764483283558
1212	GREB1L	0.488652696443934
1213	CAMK2N1	0.488605599511063
1214	S100A13	0.488548684391805
1215	CLDN8	0.488415284894411
1216	TAX1BP1	0.488092283155278
1217	CENPB	0.488034292847958
1218	REM1	0.487915965658906
1219	PLCXD3	0.487867597115025
1220	ZNF274	0.487835244898639
1221	HOPX	0.487812798119136
1222	SLITRK4	0.487799432480651
1223	SSX2IP	0.487665751030295
1224	C1orf52	0.487365672899798
1225	TRIM23	0.486929565570594
1226	TMEM208	0.486903831153382
1227	MTMR10	0.486737032221531
1228	KBTBD3	0.486126526082131
1229	FAM3D	0.48582862877597
1230	TRAPPC10	0.485802587175707
1231	ESR1	0.485627145586878
1232	KLK14	0.485596415466927
1233	PGRMC2	0.485212240639768
1234	SLC4A3	0.484982814980451
1235	C1QTNF7	0.48464340186247
1236	PTBP3	0.484451524814126
1237	SLC20A1	0.484425910855124
1238	NAF1	0.48434446660192
1239	HIVEP3	0.484100612513535
1240	PRRX1	0.48405392819044
1241	QDPR	0.483659065638359
1242	PLCH2	0.483320037129471
1243	HECTD1	0.4831821959116
1244	NDUFAF3	0.483074639511018
1245	IGFBP5	0.482919878435116
1246	DIAPH3	0.482802876534112
1247	PLEKHG4	0.48277386049425
1248	DOK4	0.482643283855158
1249	ASF1A	0.482614163329094
1250	CWH43	0.482524703536716
1251	PGC	0.482502514435094
1252	EDN2	0.482177019199183
1253	KCNK2	0.481980068117093
1254	TMEM194A	0.481864471809525
1255	C15orf61	0.481756911327362
1256	SLC41A1	0.48166946643864
1257	S1PR5	0.481230434455461
1258	PLK4	0.48110716730541
1259	C6orf62	0.480796254066118
1260	FAM109A	0.480605435579065
1261	TAF1C	0.480279669414759
1262	IL1A	0.480277159103279
1263	TXNDC5	0.479983649455377
1264	PTHLH	0.479831076060911
1265	SLC28A3	0.479527117603498
1266	SEMA7A	0.479448889170464
1267	TXNDC17	0.479392252967423
1268	DENND2D	0.479013336594918
1269	SSFA2	0.478660331860731
1270	CASC3	0.478554619540327
1271	EMILIN3	0.478407070385478
1272	RAB26	0.478310311330324
1273	C5orf51	0.478103688121232
1274	PEX12	0.478095933346316
1275	GLOD4	0.478042047833241
1276	MYL7	0.478001623653915
1277	C1orf233	0.477996216324791
1278	PCIF1	0.477831866985962
1279	KAT2B	0.47772372095673
1280	ZNF416	0.477080716147502
1281	WIF1	0.477067122356511
1282	HAUS7	0.476652557296359
1283	SYNE1	0.47616246915044
1284	GDF15	0.476016765853214
1285	TIAM1	0.475898378171223
1286	COL7A1	0.475897009534682
1287	HOXA3	0.475714298961502
1288	BTC	0.475173369574044
1289	SRPRB	0.475016429856988
1290	ACD	0.475011376105461
1291	CHD6	0.47465534533006
1292	RTCB	0.474415359387628
1293	C14orf1	0.474391951356444
1294	COBL	0.47436200431834
1295	DIDO1	0.473789454973851
1296	VPS33B	0.473632675898727
1297	MYO1E	0.473582651244954
1298	IVNS1ABP	0.473451922752131
1299	PTH1R	0.473250554290132
1300	PNMA1	0.472903705998324
1301	GPRC5B	0.472812486898847
1302	EPHB3	0.472680703255156
1303	TBC1D14	0.472006278654565
1304	FZR1	0.471959973412708
1305	IGFLR1	0.471638883601444
1306	FADS2	0.471574077756502
1307	ARFRP1	0.471451802367037
1308	C11orf45	0.471407341593907
1309	PHLDB2	0.471269844771498
1310	BBS1	0.471262014868989
1311	SLC16A11	0.471150546882601
1312	SMG9	0.471122443976261
1313	RNF144B	0.470827597239287
1314	ZFYVE27	0.470818373618492
1315	TNP1	0.470789168778922
1316	IL1RL1	0.470783448624473
1317	PHYHIP	0.470242399405055
1318	SH3RF1	0.470050188300857
1319	MAP2	0.469903312729345
1320	NSDHL	0.469824459820444
1321	CIB2	0.469706825914834
1322	ZNF618	0.469532547983824
1323	TGFA	0.469526310023091
1324	LPPR4	0.469420538493442
1325	CRY2	0.469191479633614
1326	TLCD2	0.469070744291071
1327	CLCA2	0.469063022841528
1328	ZNF276	0.468640019134846
1329	TET2	0.468358195146135
1330	MBD2	0.468262364974995
1331	BRD1	0.468195589893678
1332	TENM2	0.468038105194979
1333	FZD4	0.467936855914838
1334	MOXD1	0.467820258998579
1335	SOX21	0.467778746488424
1336	NFKBIE	0.467769168800718
1337	ELANE	0.467629254226528
1338	TMEM255A	0.467577132894525
1339	IGSF10	0.467447312197808
1340	PDE8B	0.467416067740455
1341	PBDC1	0.467173403488678
1342	UBL4A	0.467159960293211
1343	IRF4	0.467002049348613
1344	PI3	0.466803578848646
1345	SNRPF	0.466791038111333
1346	NMRAL1	0.466731779732744
1347	C16orf91	0.466695240897718
1348	SDHAF1	0.46668149298283
1349	TRMT6	0.466681293321767
1350	PTGS1	0.466615940756596
1351	PSD3	0.466440775215632
1352	CD2AP	0.466401118665076
1353	EXTL3	0.466018371003503
1354	FUOM	0.465955452414994
1355	PTPRU	0.465863938792255
1356	LRIG3	0.465520573423167
1357	CA9	0.465464995451122
1358	GLCCI1	0.465437013712546
1359	ASPM	0.46536864282936
1360	ZBTB49	0.465171172383294
1361	HIST1H3H	0.465086947291911
1362	PLB1	0.465003017778421
1363	CAD	0.464471344010404
1364	SLC29A1	0.46440561965531
1365	BBS9	0.464297471007186
1366	CCDC109B	0.464141196339429
1367	BCL11B	0.463950028184655
1368	SBF1	0.463815322749834
1369	RP11-211G3.3	0.463679182674405
1370	PNPLA7	0.463462722483639
1371	NKPD1	0.463386075668557
1372	PON2	0.463385484813909
1373	EXD2	0.463184314173349
1374	THOC7	0.463129517520583
1375	RNF31	0.462873357106798
1376	TOM1	0.46278734155422
1377	HAL	0.462748300962333
1378	VAV2	0.462358656071
1379	DMKN	0.462341343496213
1380	XRCC1	0.462331388240221
1381	PHIP	0.462290312998607
1382	PRSS8	0.461830267061533
1383	SULT1C3	0.461631036383174
1384	KIAA0232	0.461388732188131
1385	STX11	0.461315162032548
1386	ZC3H10	0.460926373214213
1387	MND1	0.460722983647327
1388	RPRML	0.460678466350038
1389	INPP5J	0.460617906409891
1390	SMIM10	0.460487318032431
1391	POLR2K	0.460457546369989
1392	PLK2	0.460448506034895
1393	C14orf80	0.460256430566786
1394	CMTM6	0.460229047043466
1395	UFL1	0.460179753835023
1396	MAML3	0.460054699390776
1397	SH3RF3	0.459914197299499
1398	ADA	0.459643915411908
1399	HMGCR	0.459083513612334
1400	GRAMD3	0.459061541886497
1401	CCDC126	0.458763954153436
1402	C17orf96	0.458535562226228
1403	RUSC2	0.458308026628877
1404	ETV4	0.458153356875245
1405	FAM160B1	0.45801404992217
1406	ZNF292	0.457829581398639
1407	ZNF512	0.457650536706241
1408	PGRMC1	0.456786529400945
1409	MYO5A	0.456488893120633
1410	ATP5J2-PTCD1	0.456461738460059
1411	BCL2L2	0.456365457607586
1412	RAI1	0.456085603024698
1413	CNIH2	0.455969428840951
1414	EME1	0.455854406122537
1415	IBTK	0.455481473962712
1416	DOCK6	0.455427183673333
1417	C2orf40	0.455379452470304
1418	TMEM165	0.455236997393493
1419	RABEP1	0.455209197294835
1420	PSMF1	0.455167928646237
1421	QRICH2	0.455074881024696
1422	GLRA4	0.455047430270423
1423	MVK	0.45500545245692
1424	TWIST1	0.455005246958499
1425	PTGDS	0.454908716105075
1426	CAMSAP3	0.454804770462073
1427	GSPT1	0.454702801441031
1428	BCL11A	0.454556781724493
1429	CEP95	0.453921118888194
1430	ACOX2	0.453851639584751
1431	TBC1D10A	0.453678381574097
1432	KRCC1	0.453638880249
1433	SLC7A2	0.453508928128884
1434	IGFL2	0.453090102818386
1435	RNF10	0.4527914400568
1436	COPS3	0.45260996940993
1437	GRIA3	0.45234305635625
1438	RRAD	0.452219148383996
1439	PICK1	0.451937295626205
1440	PDF	0.451772138536486
1441	SIPA1L2	0.45135350079474
1442	TARBP2	0.45122929026811
1443	HIST1H2AE	0.450526136089429
1444	CIRH1A	0.450042495216336
1445	WDR43	0.449768660726653
1446	DIXDC1	0.449574310832573
1447	REEP2	0.44927537044547
1448	MARCH5	0.449176238726082
1449	RABGGTB	0.449064800998419
1450	RTFDC1	0.448973566334884
1451	PPP1R13B	0.448963730916196
1452	PIEZO1	0.448853355694618
1453	ST6GALNAC4	0.448788012519248
1454	ZNF750	0.448437923277916
1455	TSHZ3	0.448426309630357
1456	ITPA	0.448364653981026
1457	PFKP	0.448265437791579
1458	GYPC	0.447969626654312
1459	CARS2	0.447712148557165
1460	INS	0.447674053209077
1461	MUM1	0.447625968816027
1462	AC069547.1	0.447574334898279
1463	ENC1	0.447429777186013
1464	FCHSD1	0.447228128447065
1465	KCTD15	0.447183298160427
1466	MAL2	0.446782925058599
1467	NCOA2	0.446654641817312
1468	ARID1B	0.44606871638965
1469	ECE2	0.446014661565262
1470	ACSS1	0.445525476946225
1471	ZC3H7B	0.445431314494934
1472	CBX4	0.445415134109058
1473	TM6SF1	0.44540382748709
1474	CDKN2AIP	0.445245745809825
1475	GBP2	0.445068662950779
1476	PTK2B	0.444522732355233
1477	SOX8	0.444418937011597
1478	GNA12	0.444080472349343
1479	SUPT20H	0.443979761393551
1480	IL1B	0.443685567584718
1481	NOXA1	0.443495593844555
1482	RNF175	0.443192999838283
1483	RCOR3	0.443162829512131
1484	RCC1	0.443029567545469
1485	ZNF436	0.442949296860562
1486	TWIST2	0.442861197988396
1487	STXBP6	0.442788620713892
1488	GLDN	0.442684933439186
1489	MNT	0.44237882348188
1490	POLR2I	0.442365395249159
1491	CD40	0.441954175432748
1492	KIF1A	0.441495276564234
1493	CHN2	0.44144968604466
1494	LRRC38	0.441155968371147
1495	DCP2	0.441080898665765
1496	PLXNA1	0.441033840537434
1497	CCT2	0.440908856231442
1498	RBM27	0.440267295094447
1499	GTF3C1	0.440195666575056
1500	PSRC1	0.44008728306501
1501	KAT6B	0.440038897589146
1502	UBE2D1	0.439956932911274
1503	TLE2	0.439946786015585
1504	CEP57	0.439893075805358
1505	FAM211B	0.439040031375748
1506	ANPEP	0.438948555354412
1507	CAPN6	0.438940342318727
1508	CDH24	0.438911963426512
1509	CNTN3	0.438806580786211
1510	APOA2	0.438792531493013
1511	CREB3L2	0.438743779427489
1512	OPN3	0.438643260454311
1513	ATL2	0.438609719413807
1514	RPS6KL1	0.438561924006266
1515	OIP5	0.438463708621605
1516	PRPF40B	0.43819855791571
1517	PIGB	0.438189944904395
1518	CYP19A1	0.438172232436276
1519	LMNB2	0.438062132198667
1520	FLRT3	0.437739105663261
1521	JUP	0.437706338432569
1522	CHRM4	0.437571592210767
1523	PKP3	0.437539574661707
1524	DRG2	0.43710510102251
1525	CBLC	0.437060150268048
1526	ALDH1A3	0.437053174189193
1527	PDHA1	0.43692689873149
1528	SOX9	0.436749997819417
1529	OTUD6B	0.436678354865691
1530	RABEP2	0.436462400050712
1531	ADCY3	0.436405896980392
1532	RAB17	0.436365803891286
1533	BIRC3	0.43632760076453
1534	MFHAS1	0.436134065758074
1535	FBXO42	0.435993056033836
1536	CYB5A	0.435743199063312
1537	MARCH3	0.435714395637322
1538	NTNG1	0.435634536691393
1539	ABHD6	0.435541734246319
1540	ATP2A3	0.435223411674184
1541	PDIK1L	0.435173374313053
1542	PRM2	0.435150341132186
1543	MFAP3L	0.435136465601986
1544	WNT3	0.435046300725365
1545	LEO1	0.435014953412293
1546	POLR1D	0.434540486067894
1547	MAML2	0.434366672146502
1548	SMARCB1	0.434357865159395
1549	PBX3	0.433809393360525
1550	MGST2	0.433794693044656
1551	ZNF84	0.433494160310373
1552	TCTEX1D1	0.433336570185976
1553	DLGAP4	0.433294831198792
1554	CSTF3	0.432950937912953
1555	PTN	0.432856497272036
1556	SOX6	0.432818335107986
1557	PTX3	0.432808540839341
1558	TRABD	0.432603902676208
1559	TMEM9	0.43246428082568
1560	MRPS35	0.432443563122094
1561	KIAA1033	0.432133951436215
1562	PPFIA3	0.432083367727573
1563	GAREM	0.431869678187169
1564	ZNF787	0.431776656575431
1565	MBNL2	0.431678820995029
1566	HRASLS5	0.431571165457476
1567	TRIM17	0.431549267313103
1568	TMCC2	0.43132221464766
1569	UBD	0.431268955909272
1570	ACADS	0.43084488227466
1571	FAM168A	0.43012018649087
1572	CHST7	0.430058066951731
1573	FEM1C	0.429969527914173
1574	PTOV1	0.429871900432854
1575	RGS13	0.42977328644486
1576	CLEC4G	0.429122835514027
1577	STAC	0.428977536056287
1578	PPM1J	0.428925744918354
1579	PDK2	0.428908660936461
1580	EXT1	0.428761228147003
1581	TRO	0.428626323884491
1582	GPBAR1	0.428623759435388
1583	SRBD1	0.428245115866603
1584	STX10	0.428225040860421
1585	GRINA	0.428123330871637
1586	APOC3	0.428108356656885
1587	ZUFSP	0.428086971179271
1588	TTC32	0.427943634293161
1589	ALOX15B	0.427794894401936
1590	RASL10A	0.427788994333687
1591	SNTB1	0.427687000273442
1592	C4orf21	0.427638101461611
1593	E2F8	0.427423729149706
1594	MMP19	0.426849189131801
1595	RAP2A	0.426827945536573
1596	PPDPF	0.426807582211158
1597	DPP6	0.426644693393181
1598	FPGS	0.426528924157134
1599	ASPHD2	0.426305162965099
1600	ADH6	0.426229136551589
1601	PCDH20	0.426166791739122
1602	C16orf58	0.426002578666118
1603	MERTK	0.425984661629691
1604	USB1	0.42589085526459
1605	MITF	0.425886151176829
1606	STK11	0.425868207723292
1607	DUSP6	0.425545545017919
1608	HSF4	0.425366053979944
1609	SLC7A4	0.425349768284391
1610	DYRK3	0.425328668442761
1611	TIMELESS	0.425312525075335
1612	LSM7	0.425098206501673
1613	SKI	0.424944571499705
1614	PLEK2	0.424871499460032
1615	ROR1	0.42472612843988
1616	PCBP3	0.424576357747854
1617	EFCAB4A	0.424559570533647
1618	RBM42	0.424455269443201
1619	USP1	0.424420779459813
1620	RPS6KA5	0.424137682851569
1621	TMCO4	0.42348791085013
1622	AP2A1	0.423472151549078
1623	NR1D1	0.42345492255957
1624	TIGD2	0.423418845947641
1625	DUSP4	0.423405929244214
1626	ACAP2	0.423169941805432
1627	HEXA	0.423168035954322
1628	FBXW7	0.422981428313601
1629	ALB	0.422940823528509
1630	ZC3H7A	0.42283629860587
1631	DUT	0.422763089388921
1632	AHRR	0.422691199159105
1633	NKAIN1	0.422689262905096
1634	CD200R1	0.422334199264621
1635	RGAG4	0.422171483539192
1636	CBLL1	0.422099470394625
1637	ALS2CL	0.421955284849872
1638	ING1	0.42183767578582
1639	RPUSD1	0.421714112177664
1640	PRR14	0.421540646889205
1641	GLI1	0.421538180321612
1642	MARC1	0.421421574519999
1643	ELMSAN1	0.42116925460702
1644	DCK	0.421156839143971
1645	KRT23	0.4210891457361
1646	DEFB1	0.420922660131392
1647	GPR161	0.420811630174334
1648	CREB3L4	0.4201636162861
1649	P2RY2	0.419939054637265
1650	RALGPS2	0.419805798153811
1651	ANGPTL5	0.419746228041099
1652	KLK5	0.419737169500408
1653	CTNNB1	0.419720910719082
1654	PGM2	0.419695805044392
1655	TBC1D30	0.419581026628528
1656	SLCO3A1	0.419504932601412
1657	C12orf5	0.419454032167687
1658	NR1H2	0.41937594147758
1659	RASGRF2	0.419247592837064
1660	PATL1	0.419151435425462
1661	TTC17	0.419140660289747
1662	EPB41L1	0.41911989985617
1663	PLEKHA1	0.419069847064296
1664	EFS	0.418788830595356
1665	GRK5	0.418743649293762
1666	NAPA	0.418714894378594
1667	SEC14L2	0.418690727321893
1668	ARID4A	0.418501465026845
1669	STK35	0.418429990626169
1670	TMEM30A	0.418273456855466
1671	MRPL54	0.418133389283505
1672	PROSER2	0.417979339677432
1673	ANO9	0.417946686004544
1674	ZDHHC9	0.417437191127634
1675	GCHFR	0.417071103402
1676	MBLAC2	0.416657612843341
1677	OPLAH	0.416651601458724
1678	CKAP2	0.416627295978994
1679	LZTS1	0.416595422764141
1680	PAPSS2	0.416553245425443
1681	ALPL	0.416477391590209
1682	GDPD5	0.416212627308415
1683	MGAT5	0.415918184056219
1684	CBS	0.415730093959059
1685	PIEZO2	0.415727718261393
1686	G6PC3	0.415726230528223
1687	WDHD1	0.415470434573222
1688	MTUS1	0.415447746538401
1689	EPOR	0.415293785408858
1690	ABCA5	0.415164682972017
1691	ZC3H12D	0.415123885068758
1692	YLPM1	0.415021945463181
1693	CTPS1	0.414915516665005
1694	PTMS	0.414847231875216
1695	TACR1	0.414765929962443
1696	CTNNBIP1	0.414742565704497
1697	PPP2R1A	0.414465139018879
1698	C17orf59	0.414398058783799
1699	NOV	0.414363991219019
1700	N4BP3	0.414342554428438
1701	CCDC93	0.414253797628778
1702	BBS10	0.414129838773302
1703	CTTNBP2NL	0.414129148254798
1704	LY6D	0.414122031404416
1705	ADRA2B	0.414033079813793
1706	PSMD3	0.413904332232585
1707	STK39	0.413884446855621
1708	LHFP	0.413855680304608
1709	NKD2	0.413822610781522
1710	DDB2	0.413764402173152
1711	C19orf24	0.41363400466559
1712	DCAF15	0.413584450843696
1713	COG7	0.413102679395415
1714	PCSK1	0.413073060220023
1715	ZNF184	0.41290288878839
1716	TGM1	0.412792301823112
1717	KBTBD11	0.41223211543943
1718	FBXO5	0.412230252904222
1719	GNAS	0.41204414114614
1720	ARG1	0.412039147245301
1721	GAS2L3	0.412026029633184
1722	CERS2	0.411855725325629
1723	CXCL9	0.411374796281555
1724	HDAC11	0.411366475103323
1725	DCXR	0.411210028449983
1726	AEN	0.411101565175188
1727	GPRIN2	0.410999828415641
1728	GFAP	0.410765178599297
1729	CGN	0.410743976248289
1730	C3orf52	0.41062773667964
1731	MYO15B	0.410524695010961
1732	GATM	0.410441396595736
1733	ATRN	0.410180314933881
1734	CPLX1	0.410070307816734
1735	BCAR3	0.409838334753927
1736	GSS	0.40973338818456
1737	PFDN2	0.409632914288726
1738	U2AF2	0.409597820800063
1739	COL13A1	0.409462513843156
1740	KIAA1671	0.409407391708375
1741	LPHN1	0.409381016940234
1742	NIPSNAP1	0.40933020192678
1743	VAMP2	0.409244547264611
1744	C12orf23	0.4092196003615
1745	PLEKHG5	0.409058031039283
1746	ZC3H4	0.40873288554596
1747	FEM1B	0.408687968335609
1748	NEURL2	0.408684109432074
1749	QSOX1	0.408510125224509
1750	USP40	0.408051529744492
1751	TRIM25	0.408023403501569
1752	FCHO2	0.407995604816112
1753	FUT11	0.407969400589058
1754	MAT2B	0.407768780996076
1755	MYLIP	0.407699691075229
1756	CD109	0.407493573739476
1757	THOP1	0.407297492791024
1758	TACR2	0.4072352613165
1759	PLCG1	0.407050029739163
1760	NRSN2	0.406882031700851
1761	JRKL	0.406857352041623
1762	REXO2	0.406393328289754
1763	SMPDL3B	0.406349888711632
1764	CALML5	0.406186043593099
1765	CMTM7	0.406091241600188
1766	ZNF837	0.405976283597317
1767	SEMA3A	0.405942906292891
1768	LRP8	0.405597960133617
1769	CCNT2	0.405442922743385
1770	TMEM132A	0.405149586838682
1771	IRF8	0.405027194307387
1772	GLA	0.404930201790176
1773	TGFBI	0.40483923765558
1774	SIGLEC6	0.40441352944905
1775	MARCH1	0.404322948517634
1776	N4BP2L2	0.404303635476242
1777	CCDC47	0.404289130374099
1778	HAS2	0.403965897420019
1779	DLL1	0.403931193464591
1780	RNF167	0.403774545312164
1781	CCDC42B	0.403382666848836
1782	MAP3K10	0.403314367881806
1783	LLGL2	0.403273112547893
1784	C1orf95	0.403223619574335
1785	LAD1	0.403178293922872
1786	MUC15	0.403171961701707
1787	PLCB4	0.403120300057996
1788	SEMA6D	0.403041297995463
1789	ACSM1	0.402891837895524
1790	TMEM176B	0.402771566606841
1791	TMEM200B	0.402765071695855
1792	MAFB	0.402721813606862
1793	CHAC1	0.402594306791834
1794	LYSMD3	0.40250111742521
1795	RNF135	0.402415685235165
1796	NPPA	0.402346054862394
1797	SHISA6	0.40220929764912
1798	GPR171	0.402155711304529
1799	MAPK12	0.402051480317522
1800	CD99L2	0.40183102774162
1801	SIPA1	0.401730807264973
1802	ZNF580	0.40161980945614
1803	ICA1	0.401292892208137
1804	HIBADH	0.40106677036695
1805	GBAS	0.400325121496423
1806	BECN1	0.399883415968437
1807	EXOSC5	0.399855401649063
1808	C18orf32	0.399708654837979
1809	HSPB8	0.399673794034418
1810	ACSS3	0.399667233116437
1811	PELO	0.399577695663046
1812	CD164	0.399325522020512
1813	TAGLN3	0.399201358641944
1814	CNTROB	0.398949192005038
1815	RAB37	0.39890092827535
1816	CMTM3	0.398871470377265
1817	SUPT5H	0.398659554022226
1818	UBAP1L	0.398510401643518
1819	C1orf116	0.398216375757062
1820	VASH1	0.397851208593839
1821	ZNF423	0.397518431180328
1822	BCDIN3D	0.396781187938798
1823	AGPAT1	0.396723283067849
1824	CDH3	0.396027639543442
1825	CACHD1	0.395975420224144
1826	RARRES2	0.395818136834777
1827	RIPK4	0.395786680566732
1828	GNRH1	0.395524156514213
1829	IGSF8	0.395380638634425
1830	ALDH18A1	0.395189195948032
1831	TP63	0.395088674234462
1832	CMTM4	0.395024047498717
1833	EPHB6	0.394974999039508
1834	DYRK2	0.39496600881815
1835	DYRK1A	0.394797696036856
1836	CCDC39	0.394777222406213
1837	HOXC6	0.394720067074438
1838	PHF15	0.394613970982373
1839	ENOSF1	0.394534498659337
1840	CRY1	0.394481831935217
1841	MCM6	0.394469995110875
1842	HMBS	0.394443404943153
1843	SNX33	0.394402591651762
1844	SH3D21	0.394367880687938
1845	ADIRF	0.394124114352182
1846	NHLRC3	0.394027786703456
1847	UBL7	0.39402678830816
1848	DBP	0.393929162884191
1849	ARSI	0.393796510925524
1850	DDIT4L	0.3937581043874
1851	METTL12	0.393745754645269
1852	UBE2G1	0.393631743950014
1853	NFE2L2	0.393168813190715
1854	TBX5	0.393150386716581
1855	MGAT2	0.392947835296325
1856	ETV6	0.392863733021127
1857	NXT2	0.392814116964734
1858	SHB	0.392713392440102
1859	B3GNT2	0.392684688130231
1860	SRM	0.392586624072331
1861	MLLT4	0.392445869476482
1862	DACT2	0.392415467729158
1863	SERTAD4	0.392313880149014
1864	LOXL1	0.392193171467929
1865	SEL1L	0.392160495126624
1866	ATP13A4	0.392157209228027
1867	REEP4	0.391749062853825
1868	CLCN7	0.391594035812207
1869	WDR81	0.391428259296868
1870	TSPAN12	0.391301339283015
1871	ADAMTSL1	0.39129519324119
1872	BCORL1	0.391110790265857
1873	PCCB	0.391052937557024
1874	FER	0.390988714405655
1875	PHF23	0.390907658704612
1876	BNIP2	0.390895794864663
1877	HSD11B1	0.390809929567308
1878	MS4A2	0.390797359766756
1879	CYLD	0.390733397722407
1880	KCNB1	0.390640760790567
1881	TNC	0.390596119540719
1882	BTD	0.390396755638108
1883	LTA4H	0.390278379685105
1884	UNC119B	0.390172441710718
1885	GPC6	0.390112755429537
1886	RHOJ	0.389766549346982
1887	VAMP4	0.389639927060704
1888	TRIP10	0.389145301082553
1889	PPARGC1A	0.389012368971347
1890	SPRY4	0.388563778551023
1891	EPHA4	0.388327536493235
1892	MLEC	0.388116623735394
1893	GPR153	0.387754507775338
1894	MGAT3	0.387639986764002
1895	DNAH17	0.387624247333705
1896	ARMCX1	0.387593605738604
1897	COX6B1	0.38758083291824
1898	C3orf14	0.387533369918717
1899	FAM43A	0.387455318214092
1900	THRB	0.387328087261293
1901	PTAR1	0.38682761195891
1902	PCED1A	0.386780057283478
1903	ADRA1B	0.386713462044685
1904	S100A16	0.386611124892518
1905	HMMR	0.386506063588066
1906	DHX58	0.38641335055435
1907	ZNF428	0.386403483925567
1908	POLD1	0.386121161153296
1909	EHBP1	0.38605597267622
1910	ATP6V0A1	0.385870809194548
1911	HSBP1L1	0.385792573601237
1912	ESPL1	0.385774814937781
1913	AATF	0.385672621330735
1914	KLF11	0.385570770264944
1915	EHD3	0.385524204439605
1916	ARNT	0.385271474546359
1917	CENPA	0.385221463139712
1918	NIPA2	0.385184955591009
1919	GALNT11	0.385102944465523
1920	ABCB1	0.385054460070604
1921	LZTS3	0.384845294970044
1922	CRABP2	0.384646299667117
1923	CYB5R1	0.384626082942592
1924	CD164L2	0.384538582667163
1925	PRKG1	0.384320864546201
1926	SDCBP2	0.384276340242183
1927	LYPD6B	0.384144553535949
1928	ERBB2IP	0.384077290543339
1929	USP25	0.384056745616891
1930	DAD1	0.384030919560364
1931	TRMU	0.383889830770812
1932	PTPN13	0.383616839189835
1933	TUBA4A	0.38351315707788
1934	EVL	0.383480381084493
1935	TMEM106C	0.383474823623597
1936	AASDHPPT	0.383337061371923
1937	B4GALNT1	0.383316099994207
1938	DCLK2	0.383311138296785
1939	PPP1R14C	0.38325984133829
1940	ZFP36L2	0.383014214234394
1941	SDC1	0.382912852417436
1942	SNAI2	0.382842807967008
1943	PQLC1	0.382473280916281
1944	VEGFC	0.382374681135241
1945	PPWD1	0.382276744304887
1946	FBL	0.382112570090553
1947	DNM2	0.382054400608099
1948	ARF3	0.381830943859561
1949	SLAIN2	0.381818353398837
1950	CNNM3	0.381770155763598
1951	DRAP1	0.381519273749259
1952	NBN	0.381513781321018
1953	TSPAN32	0.381467915016139
1954	HHATL	0.381383431774231
1955	SCG5	0.381366796652581
1956	ANKS6	0.381265558579322
1957	VWA2	0.381210979368859
1958	RFX2	0.380799825755451
1959	TSPAN5	0.380429614753676
1960	KRR1	0.380287962000891
1961	EFHC2	0.379881748824794
1962	GEM	0.37973066639806
1963	TMEM123	0.379557892228382
1964	PTGIR	0.379514978439258
1965	PRKCDBP	0.379464300343186
1966	LTBP3	0.379437465359812
1967	C8orf4	0.379339091659753
1968	BIN1	0.379321784589779
1969	PDE5A	0.379155614027357
1970	PSMG2	0.37913185338392
1971	SLC7A10	0.379018847929643
1972	GAL3ST1	0.378881122905943
1973	LMF1	0.37876492872008
1974	FZD1	0.37872571041613
1975	ZNF502	0.37866176360971
1976	LRRC32	0.378284294088061
1977	MKS1	0.378077482437376
1978	RTN4	0.378071507520391
1979	GNG2	0.378035279153517
1980	CPEB3	0.377963153151265
1981	YPEL2	0.377902606366258
1982	WNT16	0.377880184331797
1983	MICALCL	0.377816437030254
1984	FA2H	0.377623985367083
1985	MAP1LC3A	0.377570218536819
1986	SNX14	0.377413672094711
1987	PVRL1	0.377312851686256
1988	CBR3	0.377152899255437
1989	MAPK11	0.377125788386245
1990	MAPRE2	0.377124661741322
1991	PIAS1	0.377106537150021
1992	KRTDAP	0.377056352359198
1993	DCAF17	0.377033758953517
1994	APBA1	0.376813838895771
1995	CCDC112	0.376803170159246
1996	KRT4	0.376746624589922
1997	KAZALD1	0.376732949940676
1998	IRX5	0.376614452031538
1999	SYNGR1	0.376334578435667
[truncated: 7,918 more rows]

## Sheet: Group1 (TE-IR)
rank	hub	r
1	OTUB2	0.995948893736366
2	CCL27	0.990601503759398
3	C2CD4D	0.990206064404921
4	HMGXB4	0.981507823613087
5	SPATA5L1	0.97437630415023
6	BPIFC	0.972494618512318
7	B3GAT2	0.971100111767524
8	PLA2G2F	0.970278044103547
9	FAM160A1	0.967834065204954
10	GJB4	0.95545136892388
11	KRT77	0.950485873821492
12	LMF1	0.95047006597391
13	XKRX	0.949347076565379
14	GP1BA	0.944592397794997
15	DGCR2	0.944102744964821
16	GPC2	0.942679249405012
17	IL37	0.940915440874353
18	TMPRSS11F	0.936753032122436
19	MITD1	0.933432727163935
20	GLTPD2	0.932670807453416
21	MORN1	0.929188007048072
22	SERPINB12	0.924596886941933
23	CEBPZ	0.923436537674492
24	NPW	0.922042396959198
25	PSORS1C2	0.920964501004688
26	SERPINB13	0.91983655483733
27	SP6	0.919720999011142
28	RPRML	0.917451935941273
29	ALKBH1	0.91470929276818
30	LOR	0.913963090924412
31	FGFBP1	0.908622332523898
32	SLURP1	0.908416828146951
33	GCSAM	0.906944124266332
34	RNF43	0.906677126127661
35	CARD18	0.90509312416152
36	TM9SF4	0.904888393281668
37	AMMECR1	0.903428911767208
38	BEST2	0.900997697620875
39	LSM14B	0.900983395362528
40	C1orf68	0.898743911817483
41	FAM71A	0.898555679001795
42	WDR47	0.897030618728759
43	MATN4	0.896669805667323
44	VAPB	0.895780930368
45	NLRP10	0.895391752366571
46	DGKQ	0.888127642019187
47	FERMT1	0.887672465152944
48	BLMH	0.887513269753859
49	IDE	0.886668711753312
50	ALOX12	0.885343282582617
51	COL11A1	0.884413567967087
52	DHX29	0.88423375026573
53	NGEF	0.883719179244445
54	CDH3	0.882649051805124
55	APPBP2	0.881865969629538
56	PTS	0.876742767777892
57	PLA2G3	0.875979890557664
58	KRTAP6-1	0.873623492396434
59	MOB1B	0.873426573426573
60	MOSPD1	0.872907591710446
61	WDFY2	0.872815878988522
62	ACAP2	0.872461281289737
63	TNFRSF18	0.871988422657942
64	DLX3	0.871704929704468
65	ALKBH8	0.871036595186082
66	CHRM1	0.86734288869352
67	HIST1H3A	0.867287748286166
68	GCGR	0.866635307222205
69	EMC2	0.866047460440369
70	PDIK1L	0.865625034505884
71	IL1F10	0.864493392070484
72	TBC1D13	0.864279783729066
73	AADACL2	0.862689728203318
74	NEU2	0.862388560331892
75	WFDC5	0.862366039014996
76	ZNF184	0.861523296067261
77	GPR87	0.861078941034788
78	LRRC15	0.858871816639352
79	ZDHHC21	0.858615029341404
80	KLK5	0.857225910897486
81	BTBD3	0.856461009772578
82	FAT2	0.856041539222807
83	SOX21	0.855586078469359
84	SRBD1	0.855140873444785
85	DUOXA1	0.854805309248028
86	NKAIN1	0.85380036780091
87	LIPK	0.85358477139299
88	ALG13	0.853415176509158
89	SRPK1	0.852939457536737
90	S1PR5	0.85281102001282
91	TGM5	0.852631616679009
92	RORC	0.851465019536298
93	POF1B	0.851403035548935
94	SGPP1	0.851136285725887
95	GTF2F2	0.851119210304821
96	RBX1	0.850153735216691
97	SLC16A11	0.849667620866625
98	HOXC10	0.849041135271604
99	AASDHPPT	0.848934558555184
100	KRT75	0.848566068078263
101	LY6G6C	0.84799192972843
102	RTN4RL1	0.847820550456432
103	ALOX12B	0.847162622143727
104	MYBL2	0.845945537933642
105	DKFZP761J1410	0.845151471898432
106	ATP10B	0.843505196555885
107	OPN3	0.841899161118435
108	SPTSSB	0.841604922204221
109	ACSM3	0.84034536171086
110	FAM104A	0.83937226336912
111	ZHX1	0.838293837361454
112	DEFB1	0.837724991343657
113	GLCCI1	0.837521670414749
114	SLC13A2	0.837234268721519
115	ETAA1	0.837089373935687
116	HS3ST6	0.837020378876244
117	TP63	0.836956071020349
118	KLHL18	0.8358775178394
119	C1orf52	0.833743141758804
120	NAA10	0.833550359713792
121	TYRP1	0.833262787039017
122	C1orf74	0.832982444615966
123	CBY1	0.832611461945029
124	FBXO28	0.831020408163265
125	CLDN8	0.830901230682279
126	SRGAP3	0.830395923199536
127	PRR14	0.829510117772749
128	BCKDK	0.829417573760642
129	KRT2	0.829056022419734
130	IBTK	0.82793743179338
131	HSD17B2	0.827684467980511
132	INO80	0.827671689753753
133	GJB5	0.827091446972737
134	TMEM63C	0.826919703988537
135	HR	0.826723195818551
136	C18orf8	0.826122597686493
137	SNRPF	0.826014839733487
138	ZC3H15	0.825357605448951
139	TTC33	0.82064001819649
140	EML6	0.820450645829784
141	VPS36	0.820212246167587
142	S100A2	0.820037890899187
143	FOXN1	0.819900273916965
144	EPHX3	0.81953059459877
145	MMP27	0.818232801750019
146	COASY	0.817833432487681
147	HMGCR	0.817752760216197
148	HSBP1	0.817318239845495
149	PPIL4	0.817037866314224
150	BCL2L10	0.816965573138159
151	CDC45	0.814803383667003
152	EEA1	0.814627785964989
153	GIT1	0.813814368837942
154	CCNF	0.8137159866011
155	C11orf80	0.81260470107867
156	ZNF134	0.811964503983712
157	SCAPER	0.811703269932274
158	NIPA2	0.805731475110805
159	C5orf46	0.80509802270687
160	LRRC3DN	0.80457143734915
161	SERPINA12	0.803009194761772
162	ADORA2B	0.802759734469717
163	KRR1	0.802329924012405
164	KIAA1407	0.800584554609822
165	RHEBL1	0.800343165379535
166	DENND4C	0.799720801430647
167	FAM83B	0.799567826361832
168	NIPAL4	0.799313784768132
169	EPT1	0.799041515150522
170	KDM4C	0.79751071645718
171	STK32B	0.796486813948832
172	TXLNA	0.796286383350376
173	PANK1	0.796126027256059
174	NR1H3	0.795343988798765
175	STX19	0.795079712698485
176	IDH3G	0.794697782619736
177	TREX2	0.793001941719017
178	PBX4	0.792934647693712
179	ZNF460	0.792079822149861
180	NPM3	0.791596829838661
181	AC007461.1	0.791468196736648
182	LSM1	0.791172267211936
183	KRT79	0.791141602734393
184	FBXO22	0.790395028249393
185	PLEKHN1	0.790202014193118
186	ELOVL3	0.789684735767748
187	BARD1	0.789312616407107
188	PEX7	0.78883563574852
189	ENC1	0.786828922680357
190	KBTBD2	0.786797595928811
191	SPRR4	0.786274159953031
192	PRSS12	0.786238548639923
193	CSTF2	0.785968625568473
194	ELOVL4	0.785892296420822
195	GPR115	0.785065716698583
196	CTDSPL2	0.785046153604435
197	ARAP2	0.78410818654595
198	KCNN4	0.782290218937519
199	OVOL1	0.782091885090982
200	ABCA12	0.781583911144633
201	BNC2	0.781284685828452
202	URI1	0.781214099517798
203	CCDC43	0.780729739601918
204	GRIA2	0.780360852865584
205	CWC15	0.780304375664936
206	C1orf170	0.779571217003022
207	RCN2	0.779446051616792
208	LCE5A	0.778967314069162
209	TMEM164	0.778920249820849
210	NCAPD3	0.777839373992186
211	PADI1	0.776343080284924
212	FBXO41	0.776305631532096
213	TK2	0.775597273521343
214	ADNP2	0.77444000495523
215	CHMP2B	0.774308731157511
216	ESRRG	0.774143541665463
217	CPOX	0.774006230396611
218	KIAA1468	0.77268610284342
219	FUT8	0.772299066860753
220	TRPV4	0.77228440160239
221	L3MBTL4	0.771873596971519
222	JMJD8	0.771599122574242
223	FAM174A	0.770965828347129
224	PCIF1	0.770832270245446
225	MRFAP1L1	0.770799327457956
226	TCHP	0.770635221412836
227	MVB12B	0.76970352528505
228	C2CD2	0.769659746070512
229	PSMA3	0.769147085814085
230	ABCA4	0.769094121040296
231	TNNI2	0.768406218885546
232	CNTD1	0.768100516196234
233	ARG1	0.767763586976401
234	CNOT2	0.767061129066216
235	TOPORS	0.76651455459516
236	CASK	0.765331772512869
237	SLC10A3	0.764238500969074
238	NMNAT3	0.763511412474339
239	PTGER3	0.76338645787072
240	RTTN	0.763360156864504
241	KCNK7	0.763142918055251
242	PMEL	0.762821202546168
243	LCE1F	0.761721752498078
244	RSG1	0.761666865590206
245	CHMP6	0.76090344711255
246	CUL2	0.760885794830034
247	LRRC38	0.760495012961456
248	CRBN	0.760234058382573
249	SLC28A3	0.760132696909495
250	DCST2	0.759625474509351
251	IL36B	0.759576515880654
252	GPR111	0.759218253586214
253	XCR1	0.758740248483097
254	VDR	0.758271656884321
255	CTSG	0.7580768507409
256	FAM81A	0.757457757284681
257	RP11-211G3.3	0.757388113653427
258	DCP2	0.756909613030206
259	TRIT1	0.75676380917102
260	CTSV	0.756707990480487
261	BCL11B	0.756421708089806
262	KCTD4	0.754851698652008
263	ASPHD2	0.754457325419172
264	SOX5	0.754070343551952
265	RAB26	0.751735644581719
266	SLC22A31	0.751535584806255
267	DKK2	0.750786641933688
268	MED31	0.750606987462855
269	LANCL2	0.750024776922227
270	ASGR2	0.749525228830785
271	SNX24	0.749182468077672
272	SQLE	0.749178180219978
273	MAT2B	0.748626154073562
274	TMPRSS13	0.747654572967379
275	TET3	0.747239556492406
276	MFAP3L	0.746927726874431
277	TAF1C	0.746532917328017
278	ENPP4	0.74639452715056
279	ATP12A	0.746141260489654
280	MAN2C1	0.746075699374973
281	ODF3B	0.745974649024236
282	VSIG8	0.745744304334575
283	SHOX2	0.745458636080028
284	RPS6KB2	0.745272752355663
285	CALML3	0.745244142886345
286	C22orf23	0.74485930189515
287	RIC8B	0.744529881298384
288	RGS20	0.744313294205696
289	SPAG1	0.743612256134764
290	NAA30	0.743510809342941
291	PPP6R1	0.743014812354901
292	SMAD5	0.742910700828258
293	AQP5	0.742774627620643
294	SIGIRR	0.741773492055035
295	MAGEH1	0.74105931721917
296	RAPGEF1	0.740620463992873
297	KMT2D	0.739765007470078
298	MS4A2	0.739550961559269
299	GRAMD4	0.739041416755624
300	MUC15	0.738652587107452
301	MINPP1	0.738396485782775
302	CDK12	0.738374000387104
303	NMU	0.738325991189427
304	COL6A5	0.73812379740212
305	CTBS	0.738004321255053
306	CLCA2	0.737745922009899
307	MGST2	0.737260996140482
308	C11orf45	0.736753574432296
309	IMMP2L	0.736506672527216
310	VPS51	0.736439260339633
311	PPAP2C	0.735917663593504
312	ATL2	0.735748401734427
313	IL22RA1	0.735198207515163
314	SMARCAD1	0.734883271823292
315	C21orf91	0.734850599953074
316	CCNE1	0.733931742033943
317	PLEKHA8	0.73330009501143
318	ZFYVE27	0.733200431176402
319	CEP55	0.732970081526071
320	WASL	0.732894661457236
321	FGF11	0.732592593261878
322	TRIM17	0.731539562080253
323	NOXA1	0.730400118628142
324	CAPZA3	0.730246305418719
325	FADS2	0.730166437486994
326	CBLC	0.729379398977881
327	ZBTB11	0.729356736072756
328	TBK1	0.729019076923077
329	CD164L2	0.72867791216389
330	KLK6	0.728480813290759
331	GRTP1	0.728343681576649
332	SECISBP2L	0.727873644536565
333	AKAP10	0.727853516726189
334	EMILIN3	0.72773788330323
335	SDR16C5	0.727466014672646
336	AC069547.1	0.72739197325376
337	IKZF2	0.727014891867756
338	TSSK6	0.726859626592907
339	RNF111	0.726801783869958
340	POLR2K	0.726001063766007
341	C15orf38	0.725970042247896
342	RNASE7	0.725567316296202
343	ANXA9	0.725555957473578
344	DLG2	0.724592630044724
345	USH1G	0.723961180948092
346	TBC1D23	0.723246591159379
347	CA9	0.723097312605613
348	RCOR1	0.722441208538381
349	GDA	0.722189173111243
350	STX6	0.721700282131483
351	BCAN	0.721555401249876
352	LSAMP	0.721327873123318
353	ERBB2IP	0.721246012894823
354	UBASH3B	0.721034991013425
355	CCDC171	0.721000587577256
356	DHRS1	0.720837936104515
357	SDR9C7	0.72047105153296
358	IL36RN	0.720417195371942
359	WNT5A	0.720046667290102
360	NMRAL1	0.720016500440489
361	WDHD1	0.719969088337396
362	CLDND1	0.719794635692941
363	TXK	0.719734642056741
364	NPTX2	0.719548745515104
365	IQGAP3	0.719315701643092
366	LCORL	0.719268607771043
367	GALNS	0.719069647704145
368	SEMA4G	0.718983807928532
369	MARC2	0.717298894749707
370	MYNN	0.717211238800156
371	ANAPC7	0.71710698187151
372	TEC	0.716955174729727
373	SLC39A2	0.716718112117893
374	CYB5B	0.716715089495546
375	PDK2	0.716489977526334
376	AMT	0.715968715458182
377	CNTN3	0.71528246118357
378	HAO2	0.715182932907985
379	HELZ	0.715134378251751
380	ATP6V0A4	0.715128315316249
381	KPRP	0.714190512318402
382	GRHL1	0.714038628383133
383	HSPA14	0.713985944035314
384	IFT52	0.71390271235853
385	L3MBTL1	0.713696055468042
386	ZNF624	0.713692723646085
387	ASCL2	0.713637440086787
388	CDC42BPB	0.713456779843213
389	IRX6	0.713370350307528
390	ACAD9	0.713001797483523
391	FRS3	0.712622890981921
392	KLHL20	0.711457708458308
393	TGM3	0.711097437053565
394	RUFY3	0.710698830849495
395	ATP2C2	0.710548528599723
396	SAC3D1	0.710185102280641
397	ACD	0.709818165680831
398	AC012313.1	0.709672707670446
399	GJB2	0.709437298701962
400	TTC12	0.709229807196201
401	ATP6V1C2	0.708871089634386
402	IL34	0.70839868125857
403	WIF1	0.707750757867651
404	TMEM52	0.70758537448289
405	RIOK1	0.707102923526897
406	CST6	0.707089232225448
407	UCHL5	0.706962396154398
408	C16orf70	0.706492943210588
409	CBR4	0.706453342570908
410	ASNSD1	0.706274946484017
411	LAMC3	0.706057687835919
412	GGH	0.705997262527545
413	DARS	0.705564184915468
414	NUDT13	0.705123010800343
415	PI3	0.705084840147836
416	FGF13	0.70490201799269
417	LRRC26	0.704607257037252
418	FBXL20	0.704562912849334
419	SCRN2	0.703540201485625
420	BCL11A	0.70351187423607
421	MLH1	0.703019939388552
422	RGS14	0.702899114822023
423	AKAP8	0.702419185746325
424	ROR1	0.702355909072111
425	MAP4K3	0.702275365256002
426	FAM189A2	0.70211528446107
427	KRIT1	0.70206411215185
428	USP16	0.701969736101073
429	TXNDC5	0.70182405862644
430	HRASLS	0.701697416457482
431	DNER	0.701644550759918
432	CCDC42B	0.70152918296658
433	PELO	0.701480766356119
434	BRMS1L	0.701470325584494
435	GPRIN2	0.700453921056878
436	ASPG	0.700239189867743
437	LIG3	0.700238484506216
438	PVRL1	0.700203327419152
439	RNF217	0.699760775108636
440	PYDC1	0.699626677429119
441	FPGT-TNNI3K	0.699618320229427
442	DPEP1	0.699611379830132
443	ZNF75A	0.698235388373288
444	EN1	0.698232827903882
445	HELQ	0.697861120184582
446	DGAT2L6	0.697787208244923
447	RUFY2	0.697664199871256
448	HOXC11	0.697185096321886
449	CD6	0.69710561779673
450	C3orf38	0.697088627508381
451	ECH1	0.697029480507523
452	HIST1H4E	0.696920850867827
453	ODF3L1	0.696723127108107
454	PSMB9	0.696531164356298
455	PRPS2	0.69648318420859
456	SLC10A6	0.696260491573866
457	TM4SF18	0.696075089493824
458	UBFD1	0.695684539544641
459	PBK	0.695532667671677
460	SKAP2	0.695232598116385
461	FA2H	0.695102840789867
462	MON1A	0.695085280836994
463	MED7	0.694905943934076
464	CPZ	0.69489233170672
465	DUS2	0.694818644645931
466	CENPM	0.69360972442546
467	ARMCX4	0.693567240581768
468	MAP4K5	0.693524751866968
469	SMNDC1	0.693452237030801
470	ASF1B	0.692888509472999
471	HENMT1	0.692689026951407
472	PLEK2	0.692486747684802
473	MACROD2	0.692083381423542
474	ZNF276	0.692005973304026
475	TTC28	0.691469524298374
476	SP2	0.691146030269225
477	RAPGEF4	0.691063921803845
478	CHD7	0.690873445826167
479	RAB11FIP5	0.69065946647779
480	FBXO5	0.690485026619625
481	RFX1	0.690194221320734
482	PIEZO1	0.689833440571545
483	PPM1N	0.689739602381895
484	AL807752.1	0.689439485097187
485	AP001816.1	0.689164780742873
486	GYLTL1B	0.688929015375843
487	FAM83C	0.688846846775978
488	ATP13A4	0.688839776534006
489	MARCH8	0.688757893572878
490	ADCY2	0.687262270287113
491	CDCA5	0.687123287671233
492	INTS8	0.687113214457437
493	ATG5	0.686089780533159
494	PHF20L1	0.686065948269522
495	FAM188B	0.685713002985803
496	GINS3	0.685602724017357
497	POU3F1	0.685592267950998
498	LIPG	0.684837940219846
499	POLR3E	0.684657353699022
500	STX17	0.684641695814273
501	PMM2	0.684506543614354
502	DIO2	0.684370005821536
503	TYW3	0.6843670671029
504	MROH6	0.684156372002158
505	GLI2	0.684097239586076
506	SYNE2	0.683873711564533
507	PPP1R32	0.68360940326615
508	TMPRSS11E	0.683512881768111
509	HTATSF1	0.683394617680306
510	CTLA4	0.683144601328843
511	TANK	0.683092862355734
512	DOCK6	0.683017792118119
513	ZBED2	0.682855068199705
514	ZNF296	0.682726073087354
515	SGTA	0.682311660616834
516	DQX1	0.681861827986573
517	PTPRZ1	0.68179122422673
518	LIPM	0.68153452685422
519	CD2AP	0.681326062897731
520	C1orf95	0.681173159362688
521	PIK3C2G	0.681158623707099
522	SPDL1	0.680939365137463
523	PRSS22	0.680799972840697
524	CASP14	0.680589680589681
525	PDCD2L	0.679698525393934
526	PPP2R5B	0.679459756496048
527	NXPH4	0.679321893093164
528	TBX15	0.679121187920363
529	ARIH1	0.678924182336572
530	TEF	0.67881334628659
531	ADTRP	0.677988814481595
532	SOCS7	0.67797868295265
533	FOXQ1	0.677310328285338
534	TET2	0.677035044690006
535	C2orf40	0.677026376450258
536	CHADL	0.676787383123556
537	MIPEP	0.676641348481361
538	CTU2	0.676313404964668
539	THOC7	0.676002833973014
540	SERPINB5	0.675669403632294
541	FBXL16	0.675613622730268
542	CLEC4G	0.675574162623313
543	SLC27A6	0.675496290673052
544	THUMPD2	0.674792381289207
545	ATP7A	0.674710451716248
546	PAK6	0.674631732550911
547	IRF2	0.673938687104149
548	TMEM88B	0.673701306490016
549	JARID2	0.673678689996193
550	HN1L	0.673238553889588
551	MIER1	0.672417597678957
552	SPAG5	0.671901678109424
553	C11orf49	0.671850074651445
554	KDM4A	0.671644246618275
555	LAMTOR4	0.670433221242168
556	S100A3	0.670255524334061
557	GPX7	0.670221599928102
558	SUV39H1	0.670152588775264
559	HOOK1	0.668954849141932
560	FBXO8	0.668930013449819
561	NRN1L	0.668783818032933
562	ESF1	0.668659583898972
563	PINLYP	0.668486401317378
564	ZNF410	0.668431464016226
565	SLC6A11	0.66831718284297
566	GAL	0.668122881646624
567	GOLT1B	0.667855068819892
568	SEMA5B	0.667089657350659
569	DTNB	0.666690273748425
570	WASF1	0.666630321455844
571	LRFN4	0.666527834186354
572	BCL2L11	0.666355663068636
573	BEX4	0.666035207688398
574	UCHL3	0.665631879486911
575	D2HGDH	0.665124424963761
576	GNA12	0.664533146291273
577	DPCD	0.664264251446377
578	MID2	0.664000027496667
579	ACOT8	0.663811777877921
580	TDP2	0.662644799692437
581	LEPREL1	0.661288736166162
582	TMEM238	0.660766906044541
583	KRT78	0.660590133169237
584	VAV2	0.660463149673831
585	STAG2	0.660277620819246
586	CST7	0.659931411896223
587	DACT2	0.6598630062769
588	SMEK1	0.659751592692483
589	SCRN1	0.659480254027782
590	ATP2B1	0.659363765477883
591	R3HCC1L	0.658890044973824
592	LYSMD3	0.658800006402557
593	AGR2	0.658401166624301
594	GPATCH2L	0.658234817362153
595	FBXO4	0.658144222748527
596	LDLRAD4	0.658100591681822
597	SLC6A15	0.65772157272434
598	OTUD6B	0.65742152122189
599	COL9A2	0.657160944699806
600	GAL3ST1	0.657139346583422
601	CALML5	0.657035173396986
602	PVRL4	0.656733296461446
603	MEIS2	0.656708969866059
604	INSIG2	0.656687570919484
605	ESYT3	0.656575962949082
606	FKTN	0.656146704340663
607	MYO19	0.65570675812642
608	FEM1B	0.655702656586162
609	SCO2	0.655625416252833
610	ARHGEF25	0.655371855737175
611	DSG4	0.654978083907326
612	TNNI3K	0.654902356941229
613	ACP5	0.65472870377973
614	KRT27	0.654697286012526
615	OVOL2	0.654688684332588
616	NFE2	0.654516931468438
617	CERS3	0.65429087842811
618	MOXD1	0.653893581150693
619	MBLAC2	0.653743431534382
620	PGLYRP3	0.653580213288542
621	HOXA7	0.6532048745298
622	MRPL13	0.653086375123104
623	JMJD7	0.652899215657115
624	GSKIP	0.652825208304646
625	SEMA4D	0.652735046852045
626	ZNF416	0.652545645579051
627	TTC17	0.652404041249754
628	RRAGB	0.652247447151883
629	TMEM125	0.652150348539594
630	MVK	0.651881500748905
631	DNAAF3	0.651211499291251
632	ZNF711	0.651110726942692
633	MYRFL	0.651037429280247
634	SOX15	0.650517604636329
635	LRRC1	0.649990557989182
636	PPP2R4	0.649966446410196
637	MOGAT2	0.649308636976942
638	GRINA	0.64896402514077
639	RP11-295P9.3	0.648520082860256
640	ACAD8	0.648151730763764
641	TRABD	0.648002911925556
642	PSMC4	0.647355527701515
643	ASTL	0.64664496482201
644	MTERFD3	0.646617592004936
645	SQRDL	0.646535407813426
646	INHBA	0.645489955177199
647	PKMYT1	0.645395850994692
648	HSD11B2	0.644749813053302
649	SCFD1	0.644643629174654
650	VAV3	0.644619333331389
651	CDIP1	0.64445181470503
652	LHX2	0.644224700189354
653	LPHN2	0.644052219890539
654	HOXC6	0.643024512632377
655	IL1RL1	0.642978588867058
656	CCSAP	0.64284416914833
657	CDK14	0.642545214238794
658	COMMD10	0.642143393355128
659	TNN	0.64193177708002
660	NCOA2	0.641893532852047
661	NR3C1	0.641594577618564
662	HPGDS	0.641589221790484
663	PLA2G4D	0.641269677524063
664	TBX1	0.640429914137465
665	DPP8	0.640370072792631
666	SGMS1	0.640294266062441
667	LCOR	0.64012938029866
668	ZNF605	0.639595500584028
669	MGAT3	0.639550021131482
670	HOOK2	0.639477593468682
671	PET112	0.639433400283264
672	TEX261	0.639166233747749
673	ATP10A	0.638882613152375
674	FBRS	0.638683101910288
675	PRIM1	0.638347345453398
676	LGR5	0.638161603031567
677	ARMCX3	0.638138466563233
678	UCN2	0.637898224727228
679	GPT2	0.637872209231575
680	CAPN8	0.637415133184365
681	SSC5D	0.637313647082949
682	SMPD2	0.637102031707947
683	ENHO	0.636835172870713
684	C9orf142	0.636491363722426
685	FANCA	0.636321563957887
686	LGALSL	0.636268533732016
687	GUCA1B	0.635952616484607
688	OCA2	0.635728466580425
689	MBIP	0.635600063432231
690	WDR75	0.635322521281474
691	SPACA4	0.6352225018937
692	TESC	0.635087438397434
693	C2orf72	0.635064363545759
694	INPP5J	0.634758071315488
695	MANEAL	0.634721353465238
696	DMXL1	0.634683447825781
697	TP73	0.63392728169772
698	POLD1	0.633801991229497
699	SLC16A5	0.63339992922752
700	ASUN	0.633381865954153
701	BBS4	0.633346957346556
702	PTTG1	0.633328594447709
703	PTHLH	0.633321291765049
704	ZBTB49	0.633257086806313
705	IP6K1	0.633223809604523
706	HIRIP3	0.63315512254328
707	LCE4A	0.63315303849825
708	DCAKD	0.632696806075816
709	SCMH1	0.632219535006274
710	KRTAP3-1	0.632137550413925
711	ITGB7	0.632101050895581
712	CRLS1	0.631701383718431
713	MYO5A	0.63165232696736
714	CPXM1	0.63115192061582
715	PKP3	0.630754322150927
716	ELMO3	0.630712690402818
717	CD3D	0.630210450920627
718	LRP4	0.629703583617064
719	CCNB2	0.62964319077657
720	C11orf24	0.629489942861063
721	PFKL	0.629481582091072
722	EDN2	0.629342739521984
723	COQ2	0.629153593463983
724	VPS16	0.628671713774488
725	METTL12	0.628561252521018
726	TGFA	0.628487174599767
727	HDC	0.628182755197523
728	PIP5KL1	0.628152786943949
729	PRSS8	0.627812170257539
730	KCTD14	0.627211945572078
731	SPATA13	0.627191540907035
732	FPGT	0.627052544573253
733	TMEM139	0.626697088852347
734	USP45	0.626654582587908
735	ENKD1	0.626421805796485
736	F12	0.626322204984712
737	EXOC6B	0.625500071825207
738	WNT4	0.625423814835164
739	PARD3	0.625418728745005
740	FZR1	0.625365099156457
741	C1orf216	0.625197772901115
742	ZBED6CL	0.625166373417615
743	KIF5B	0.625131761442441
744	SYT8	0.624811183515498
745	BAI1	0.624604403840047
746	EDIL3	0.624491281100412
747	CRABP1	0.624252676271409
748	SGCG	0.624102577360451
749	LAS1L	0.624015556721391
750	AC006116.20	0.623840129657166
751	PATL1	0.623556133675528
752	MKL1	0.623548311379921
753	WNT9A	0.623480577574582
754	CRIP3	0.623446247055723
755	NOL6	0.622881689644721
756	C2orf76	0.622853246518997
757	EPN3	0.622843154476889
758	ASF1A	0.622736201968792
759	WNT6	0.62255725375291
760	SLC26A9	0.622169933227264
761	NUDCD1	0.621981411996214
762	C16orf93	0.621255312799086
763	FITM1	0.62113518303353
764	FAM49A	0.621106578032903
765	ENGASE	0.620946177718031
766	ASH1L	0.620707525930073
767	PJA1	0.620573721673546
768	EIF6	0.620298091588887
769	B2M	0.62020256802328
770	CD200R1	0.619836067226281
771	LYNX1	0.619640056686789
772	KPNA1	0.619598292330916
773	REPS1	0.619301091455936
774	HGD	0.619173652694611
775	GATM	0.618845293840747
776	ARMC7	0.618650073295897
777	GPATCH1	0.61864763110923
778	SLC4A11	0.61831493540471
779	MLST8	0.617879493056354
780	ATHL1	0.617314550391531
781	PIP	0.616546015664927
782	TSSK4	0.61638678061316
783	ABHD17C	0.616083697801174
784	TAS2R5	0.615999503620582
785	TSPAN4	0.615662649415275
786	MRAS	0.615419049219455
787	CDC42BPA	0.615341753020148
788	DLX5	0.615267995054078
789	KIAA1671	0.614986091101506
790	ZNF418	0.614708408211301
791	XAB2	0.614518084170195
792	FAM150B	0.614447895866341
793	ARHGEF19	0.61437992917724
794	SERPINB7	0.614340038136242
795	ZSWIM4	0.614298139208933
796	TRPC4AP	0.614157624904092
797	TMCC2	0.613715273174062
798	MB21D2	0.613644199468954
799	CYP7B1	0.613433339735085
800	P4HTM	0.613320621767601
801	NEURL4	0.613282241743841
802	ECSIT	0.613025037575248
803	PAG1	0.612893783509563
804	ATP2A3	0.612893601091353
805	GTF2E2	0.612447276213219
806	FHIT	0.612186676670898
807	NOD2	0.611990208355746
808	CPA3	0.611513724268703
809	SUSD4	0.611091558373142
810	WFDC6	0.61105722599418
811	USP43	0.610886434088115
812	POLR3B	0.610810321274049
813	PPP2R1B	0.610579526241877
814	SPIRE1	0.610515717386875
815	STXBP5	0.610326867447969
816	ARFGAP3	0.610299214147306
817	ASIP	0.610214502167443
818	BRD4	0.609839310890587
819	ACSS1	0.609521044773594
820	MFI2	0.609431865347572
821	C12orf45	0.609206450034224
822	UBE2D1	0.609020716652347
823	KRT73	0.608958445763627
824	MAP3K7	0.608864485503593
825	GPR37	0.608431211561459
826	PPFIA3	0.60828290986841
827	ISLR	0.60826421254656
828	NHS	0.608198665098197
829	CHML	0.608003457839571
830	EMID1	0.60777235633409
831	DNMT3A	0.607688392021395
832	INHA	0.607451585863106
833	BEAN1	0.607350958173672
834	EAPP	0.607307532681898
835	KRTDAP	0.606997883093036
836	FBXO33	0.606832765923138
837	FRS2	0.606750063959446
838	E2F5	0.606637421800287
839	FAR2	0.606589521063414
840	HIVEP3	0.606299282302447
841	MEF2B	0.606081107844668
842	LPCAT1	0.606075762153134
843	CDR2L	0.605994317997471
844	KLHL13	0.605881723564158
845	ZC3H10	0.605644084998649
846	NTNG1	0.605415580511194
847	CD3E	0.605405380856828
848	THAP8	0.605264232306975
849	CCL19	0.605254867734461
850	U2AF2	0.604968308015425
851	IL7	0.604907463435905
852	SLCO3A1	0.60489351620462
853	ARC	0.604892082752406
854	LIG4	0.604397483789405
855	ADCK5	0.604264535880047
856	EXTL1	0.604256935512453
857	PHACTR3	0.604083117381776
858	EFCAB7	0.603251145627391
859	SCAMP5	0.602650985381584
860	TRIM62	0.602637355599572
861	NUSAP1	0.602231906904237
862	BNIP2	0.602188347140836
863	FLRT2	0.602119656189807
864	GRHL2	0.601799120711964
865	PIK3CB	0.601720749097176
866	KBTBD11	0.6014938190504
867	GREB1L	0.601069142506094
868	NCAPH	0.600980189197968
869	C1orf122	0.600765257481564
870	DDHD1	0.600715499474774
871	KIAA0753	0.600468379623969
872	SDR42E1	0.600259254115646
873	GRM2	0.600156786539245
874	CAAP1	0.600147054491668
875	EFR3A	0.600076565140558
876	LSR	0.600043372383305
877	CTDP1	0.600027205988828
878	CDSN	0.599891363389462
879	DLG5	0.599752559118343
880	PPAPDC1A	0.599673046658075
881	PLEKHG5	0.599654643112493
882	CLSTN3	0.599127127607702
883	PHTF2	0.599001774852783
884	PRRG2	0.598947281902832
885	CUL4A	0.598741852814723
886	ASAP2	0.598659085220004
887	RAPGEF6	0.598360752796149
888	JUP	0.598171060602289
889	ZBTB39	0.598070661327274
890	HEPHL1	0.597706189672567
891	KMT2A	0.597651599650038
892	SFRP5	0.597633857787535
893	LZTS1	0.597301864830246
894	KRT23	0.597186699459397
895	HMGN4	0.596413434522346
896	ADAMDEC1	0.596297678842521
897	MASP1	0.596154228517629
898	CENPP	0.596078431372549
899	SPINK7	0.595820375838396
900	WNT5B	0.595685888357321
901	TIFA	0.595185754043361
902	CDH11	0.595046154428986
903	EMC9	0.594741991648837
904	FAM117A	0.594722398820219
905	VMO1	0.5944268376478
906	ARID4B	0.594376017383987
907	HOXC13	0.594070348526295
908	FAM84A	0.593971061662755
909	PGS1	0.593133314425717
910	CUL9	0.59310472553841
911	AIM1L	0.593049225557545
912	AQP3	0.593003958999372
913	TPX2	0.592870304310786
914	PIP5K1B	0.592591303369807
915	FGR	0.592371721686067
916	FCHSD1	0.592340492740696
917	GNAI1	0.592235375615871
918	IFIT5	0.591984714408407
919	REEP4	0.591852626687583
920	GIPC2	0.591788270138872
921	TMEM56	0.591435226246752
922	AP5M1	0.591368808649247
923	LAMA1	0.591258552066997
924	RABGGTB	0.591033566059575
925	NDUFAF5	0.590962901555275
926	ZDHHC23	0.590891895387373
927	SNX13	0.590816907428507
928	FEZ2	0.590783916816627
929	DST	0.590765713553701
930	ATE1	0.590762637133402
931	VSIG10L	0.590282869277908
932	C6orf226	0.590220767629435
933	RAI1	0.58999705231353
934	SAMD1	0.589861120752716
935	DNAJA2	0.589852415498247
936	ATP11B	0.589628683055682
937	RNF135	0.589482291657315
938	PITPNM3	0.589161001561339
939	CRCT1	0.589135897001593
940	FARS2	0.588932443010651
941	C16orf80	0.588615209155937
942	CLEC3B	0.588244551281887
943	OSBP2	0.588122474821917
944	ARHGAP35	0.587728534507514
945	OXGR1	0.587460053577735
946	SLC5A9	0.587421337532293
947	USP25	0.587392795649879
948	TMC8	0.587326577958236
949	ARMCX1	0.58716089585077
950	ITGAE	0.586781992677307
951	DNAL4	0.586414000162935
952	LCN2	0.586328307244437
953	OSBPL11	0.586227938721409
954	CCBL1	0.58590152792137
955	ZMYND8	0.585845459193282
956	IFT27	0.585611241893108
957	ZFP62	0.585590654506874
958	EPGN	0.585589675908833
959	SPSB2	0.585401577361198
960	ADAM19	0.58520889626504
961	DLX6	0.585134748551234
962	RFC4	0.58497704314409
963	ATG9B	0.584822997220108
964	FANCI	0.584776985895179
965	PSCA	0.584323060898057
966	MAML3	0.584316535756375
967	TTC9	0.584301964838036
968	SRP54	0.584172838095587
969	CD58	0.583693048639704
970	QDPR	0.583687789898386
971	ABHD4	0.58333107577708
972	RPGR	0.583117675355285
973	S100A13	0.583074774561377
974	DENND4A	0.58297078469952
975	CREBL2	0.582921726716779
976	CYP2J2	0.582797785410592
977	CCDC64B	0.582595319004702
978	METTL9	0.582174377575665
979	EIF2B2	0.582071051833292
980	PFKFB2	0.581959260832931
981	GPR150	0.581141308773691
982	SOX8	0.580973351610999
983	CTHRC1	0.580647083485418
984	KCNK1	0.580433254076046
985	FEZ1	0.580307923730009
986	PRRX1	0.579976354309069
987	UBALD2	0.579831557087712
988	KCTD11	0.579712808824461
989	EHD3	0.579633075807626
990	FOXA1	0.579530770355172
991	STARD3	0.579229305872779
992	TRPM2	0.579207306373818
993	ID4	0.578624686631837
994	OXSR1	0.578466693928217
995	NBL1	0.578417256429589
996	AURKB	0.578415319810546
997	BRD1	0.578393187352399
998	MEDAG	0.578378325775122
999	XYLT1	0.5782459557153
1000	SMIM8	0.578125075724457
1001	LYPD2	0.57803791685024
1002	RNF128	0.577992961158215
1003	MAP3K9	0.577842436400168
1004	ZNF664	0.577705887501376
1005	IL1A	0.57765502651721
1006	CNOT8	0.577443614438227
1007	PDE4D	0.577397348171653
1008	FAM167A	0.577334600335186
1009	CHRNE	0.577269036754992
1010	C1orf233	0.577159869247639
1011	PDZD2	0.577147728097656
1012	SPTBN5	0.576964714007861
1013	CRISPLD1	0.576887687256737
1014	FAM57A	0.576820486489399
1015	EDNRB	0.576658788814361
1016	RCL1	0.576466095674172
1017	TARBP2	0.576376056077788
1018	RALGPS2	0.575814531035678
1019	SUFU	0.575052057231343
1020	ALOXE3	0.575040362522064
1021	LPIN2	0.575016086939292
1022	PEX3	0.574979055961123
1023	MMRN1	0.574907839697503
1024	C1QTNF3	0.574896512972865
1025	C1orf115	0.574720380123329
1026	SUPT20H	0.574704632363281
1027	SERPINB8	0.574471867676643
1028	TPK1	0.574470349591941
1029	SLC25A42	0.574122206168908
1030	PALD1	0.574071962891672
1031	LPHN3	0.573861299256862
1032	SAA4	0.573764028460354
1033	WNT2B	0.573646736445273
1034	GRHL3	0.573567305096488
1035	TMEM150A	0.573257553202732
1036	KRT80	0.573212556030361
1037	EPHB1	0.573076315615079
1038	ZNF577	0.57307403993494
1039	IL17RE	0.573022878644366
1040	SH3BP1	0.572940748099322
1041	ITPR2	0.572517620054975
1042	DNASE1L1	0.572516088322934
1043	RFX8	0.572147094895557
1044	ZMYM6NB	0.571915256093232
1045	BNC1	0.57191055119471
1046	SPTLC3	0.571815966428293
1047	SLC46A2	0.571278613591007
1048	C1orf116	0.571127996823261
1049	SPOCK1	0.570584697251002
1050	ANGPTL5	0.57053775699924
1051	PLTP	0.570521698545185
1052	GALNT1	0.570478635141998
1053	GALNT12	0.57047841351904
1054	SYBU	0.570184003004131
1055	CELSR1	0.569814301706225
1056	CDC25B	0.56974681986463
1057	C6orf211	0.569367036767771
1058	DUS3L	0.569205011808103
1059	ECI2	0.569196734508399
1060	SNAP25	0.568994857478982
1061	KDELR3	0.568860142746119
1062	MUM1	0.568771660122193
1063	TCEAL8	0.568426492119542
1064	ANAPC5	0.568402929637726
1065	ETV5	0.568262523524488
1066	PSMD3	0.568227357131246
1067	CTSH	0.568093285807293
1068	TRNP1	0.568067146642911
1069	CYP27B1	0.567994105120638
1070	FAM26F	0.567501668115072
1071	EFNB3	0.56734562564815
1072	POMT2	0.566969393902776
1073	PCED1B	0.566483110982233
1074	ZBTB7A	0.566246399134346
1075	ARAP1	0.566219720144024
1076	SLC45A3	0.566092948442446
1077	FANCL	0.5658510500777
1078	SYNPO2	0.565785390886048
1079	B9D1	0.565772238631448
1080	CREB1	0.565635303853682
1081	C20orf27	0.565597591797894
1082	MORC3	0.565299775078869
1083	PDE9A	0.564841404492173
1084	GPC6	0.564630177865145
1085	PM20D1	0.564331068285619
1086	CIB2	0.564302308323733
1087	CBR3	0.564161968320527
1088	AZI2	0.563940094900467
1089	CLEC5A	0.56379436879068
1090	RGS11	0.563768956758458
1091	SPHK1	0.563636197480793
1092	ZDHHC6	0.563384561226642
1093	GUCY1A3	0.563373054843665
1094	TANC2	0.563330547014921
1095	HAL	0.563066456273342
1096	EPC2	0.562837598221443
1097	RNMT	0.562800853164186
1098	FERMT3	0.562734658699776
1099	KIAA1199	0.562713902837156
1100	PRR15L	0.562702944211956
1101	SPTBN2	0.562684672223271
1102	HECTD2	0.562615563823905
1103	DCD	0.562544121046459
1104	E2F8	0.562507961663108
1105	TOPBP1	0.562450740100172
1106	PPP6R2	0.562428686859711
1107	CXCR5	0.562211952102394
1108	RDH11	0.561951034325198
1109	MYL7	0.561823025430257
1110	FAM65A	0.56160286824315
1111	HPS4	0.561553187373013
1112	ZCCHC6	0.561125890094351
1113	CGGBP1	0.561074109429131
1114	EPHA1	0.560947875523316
1115	COL17A1	0.560816168596365
1116	FBLN7	0.560629358742473
1117	PNLIPRP3	0.56035042531901
1118	ZNF740	0.560233993897501
1119	PKIA	0.560053452787436
1120	ZNF263	0.5594772113048
1121	FECH	0.559295760588126
1122	DRD4	0.559103724249253
1123	KDM5C	0.558706902397461
1124	CAPN12	0.558535576445014
1125	HABP4	0.558356495609507
1126	FGFR3	0.558202512189186
1127	BBS2	0.558190604155801
1128	PLEKHA1	0.557757637543635
1129	ELAC2	0.557647058823529
1130	CYB5R2	0.557498102397101
1131	C12orf5	0.557406045269782
1132	SSX2IP	0.557366350487968
1133	LPHN1	0.557205572674906
1134	THBS3	0.557069046767067
1135	GABARAPL2	0.556851998277359
1136	HIST3H2A	0.556720775144424
1137	SEMA6C	0.556601589121642
1138	EML2	0.556364361411732
1139	GPR68	0.556242184266274
1140	PAPSS1	0.556157582722929
1141	HMGCS2	0.556056751769213
1142	KIAA0100	0.556011858985194
1143	TMEM65	0.555780709450544
1144	TRUB1	0.555650263211225
1145	TRIM23	0.555594435541393
1146	TCERG1	0.555447435565333
1147	IGDCC4	0.55540939911604
1148	TFAP2C	0.555276865969825
1149	C3orf58	0.555265741607195
1150	RDH12	0.555131102400037
1151	MEOX1	0.555040805338963
1152	INTS10	0.554853513452508
1153	ATP6V0D1	0.554754176431517
1154	ANO9	0.554644942126501
1155	MTA3	0.55454694586775
1156	DBP	0.554474010594424
1157	EBLN2	0.554428523639241
1158	PAPSS2	0.554386150950399
1159	RGMB	0.554355227909003
1160	TRABD2A	0.554351506644357
1161	NIPSNAP3A	0.554327994909563
1162	ABCA3	0.554179418746563
1163	FAM110A	0.554029298949185
1164	CCDC92	0.554019617866195
1165	MOGAT1	0.553913371826274
1166	ZNF84	0.553844863751005
1167	SENP6	0.55383009252669
1168	PCP4	0.553661069983935
1169	PAPPA	0.553561285756221
1170	ARMC6	0.553525981632905
1171	DIO3	0.553231378206308
1172	CLSTN2	0.553194797137247
1173	SIPA1	0.553129595996609
1174	TNFRSF13C	0.553012635727932
1175	REXO1	0.552990836825654
1176	LYSMD1	0.552984713530756
1177	FGF18	0.552948003381958
1178	RABEP2	0.552898203807937
1179	CHAD	0.552836222180353
1180	HMMR	0.55267621992712
1181	MATK	0.552542868486681
1182	ANAPC10	0.552474846214083
1183	ATP13A5	0.552472523814981
1184	FRAT1	0.552467849140733
1185	HSPB11	0.552333602507425
1186	TMEM117	0.552307372137752
1187	PPP2R1A	0.552287179305736
1188	ARHGAP32	0.552088843163007
1189	ZC3H4	0.552009608236768
1190	STAG1	0.551882982614475
1191	EME1	0.551727895673879
1192	KLK1	0.551670465022405
1193	WFIKKN1	0.551569961872436
1194	LST1	0.551308927394107
1195	ITM2C	0.551142095430347
1196	LRP8	0.550638629254445
1197	C2orf43	0.55018281535649
1198	C9orf152	0.549882483192863
1199	SCARB1	0.549630819110398
1200	LGALS8	0.549359421674418
1201	TLCD2	0.549304279731496
1202	SLC25A18	0.549179175021015
1203	TRIM35	0.54878684497909
1204	ZC3H12C	0.548638071265574
1205	FAM3B	0.54817832543196
1206	TMEM99	0.548129944349134
1207	FER	0.547893893799972
1208	CMA1	0.547394259352033
1209	DLG1	0.547300611572942
1210	IL15RA	0.547296508766334
1211	ASPRV1	0.547295983724007
1212	CD40	0.547276059436205
1213	CLCA4	0.547254238745714
1214	TENM2	0.547119768848543
1215	UBA3	0.547088107150511
1216	CBLN2	0.547018304958128
1217	TCF7L1	0.546971060161668
1218	PPP2R3C	0.546838771212165
1219	MED4	0.54652080748844
1220	CENPJ	0.546490782987756
1221	APOM	0.546418717048189
1222	TP53BP1	0.546194637968109
1223	TMX3	0.546173943290546
1224	GNLY	0.546020759335972
1225	MAP1S	0.545987637246652
1226	SIPA1L2	0.545950914461014
1227	TSPEAR	0.545864831321223
1228	KIAA0556	0.545718724345673
1229	NDFIP1	0.545600095381654
1230	TMEM243	0.545398989769101
1231	UNC5B	0.545334163376342
1232	SLC25A46	0.545270492645285
1233	GAPDHS	0.545044027997291
1234	BDKRB1	0.545024066486742
1235	FAM83H	0.544893144803553
1236	TMEM132C	0.544823623984718
1237	KMT2E	0.54471588051235
1238	PPP1R16A	0.544675410266869
1239	NGDN	0.544525614731251
1240	EPB41L4B	0.544293952389346
1241	RAB38	0.544224785142744
1242	ITGAM	0.54404181922477
1243	CENPB	0.543980621812399
1244	ADCY7	0.543759615852682
1245	TRAPPC6B	0.543570272719012
1246	PRMT3	0.543539669042384
1247	PLCXD3	0.54338664456631
1248	CEP95	0.543367397439727
1249	ENDOU	0.543194655276423
1250	RBBP8NL	0.543123885218883
1251	TCF7L2	0.543067050958322
1252	N4BP3	0.543042489221767
1253	GALNT3	0.543028857451708
1254	TK1	0.542794059217992
1255	CREBBP	0.542666446868205
1256	CYGB	0.542588647060475
1257	MYO1G	0.542531069401554
1258	CORIN	0.542260996650701
1259	PRTFDC1	0.54218373886036
1260	CTC-349C3.1	0.542183315324259
1261	SFN	0.542086321660594
1262	ETV4	0.541907331292305
1263	PDZD7	0.541832682456832
1264	CPSF4	0.54178346444695
1265	SLCO2A1	0.541548456878472
1266	TP53I11	0.541542816680131
1267	RNF39	0.54143876661582
1268	NSDHL	0.541180196012024
1269	ETV7	0.541097180307867
1270	FLNB	0.541083175641927
1271	TMEM211	0.540926072681988
1272	LAMB3	0.540811993001734
1273	MCM9	0.540737554216608
1274	LMNB2	0.540729613444219
1275	LIG1	0.540692382733174
1276	RHOD	0.540532567473263
1277	ARNT	0.540505905734042
1278	MGME1	0.540498424097265
1279	POLR3H	0.540443309945181
1280	XRCC1	0.540440291923496
1281	FAM132A	0.540403228188558
1282	SERTAD2	0.54019912896379
1283	DYRK1A	0.540055569349132
1284	SCNN1B	0.540019404094022
1285	RILPL2	0.539953868405466
1286	SLC35B3	0.539917111090165
1287	MCEE	0.539760737555833
1288	MAP2	0.539526337678569
1289	ASAH1	0.539409565830132
1290	IGFL4	0.53927235634138
1291	SCPEP1	0.539075962917723
1292	USP38	0.538953150472257
1293	ZDHHC14	0.538913156829355
1294	TSPAN11	0.538691715925448
1295	SERPINA1	0.538645432408761
1296	KLK11	0.538603593044276
1297	METTL23	0.538572108175597
1298	GRIA3	0.53825344517978
1299	COL4A5	0.537893328376665
1300	TMEM11	0.537514693443281
1301	FCER1A	0.537304610996747
1302	NKD2	0.53715579507513
1303	SLC25A39	0.537023800282254
1304	CMC2	0.537018558630817
1305	CD8A	0.536542884696039
1306	G6PC3	0.536188919233059
1307	SEMA3D	0.536137097290426
1308	ZUFSP	0.536029601492401
1309	WNT10A	0.535267363313194
1310	LCK	0.535223783176517
1311	STRN	0.535219247776666
1312	BTBD2	0.535199696188561
1313	KRTAP29-1	0.534788540245566
1314	FAM46A	0.534742289490196
1315	KPNA5	0.534638805548796
1316	CIB1	0.534494692658708
1317	RNF166	0.534460612923786
1318	PDGFRL	0.533977183247136
1319	UCK2	0.533968908736233
1320	RSPO4	0.533833118463206
1321	HECTD1	0.533728883992562
1322	PLXDC2	0.53362201851538
1323	TMEM38B	0.533566571453897
1324	DHRS13	0.533561287820155
1325	OGG1	0.532985840232795
1326	ZNF292	0.532757142457956
1327	TMEM126B	0.532511331271264
1328	C12orf23	0.53238373884837
1329	KLHL11	0.532327298232562
1330	GID8	0.53216347592779
1331	HOXD10	0.532151955403633
1332	DCBLD1	0.531632837890564
1333	MAB21L1	0.531575017872131
1334	CTDSPL	0.531401232243697
1335	SLC1A6	0.531282051282051
1336	COL6A2	0.531153738103988
1337	FARP1	0.531116510551213
1338	WIBG	0.530845908924805
1339	SERPINF2	0.530816281628163
1340	MANEA	0.530765115198943
1341	MRPL54	0.530650513149325
1342	HAUS4	0.530618490641826
1343	TGFBR1	0.530391976910516
1344	WDR59	0.530315132572866
1345	CLDND2	0.530299682388597
1346	ALDH18A1	0.530237402719679
1347	BTC	0.530217982871354
1348	EML1	0.530063747981097
1349	RPP40	0.529860025966261
1350	CHD9	0.529351654239185
1351	PCTP	0.529301892994524
1352	ORC5	0.529262646473059
1353	ERCC6L2	0.529047480420917
1354	DYNC1I1	0.52879266237718
1355	MAP3K2	0.528636311213685
1356	COBL	0.528612148491204
1357	FAM102B	0.528611766419782
1358	ARHGAP12	0.528578512633497
1359	VAMP4	0.528351326857188
1360	PTPN7	0.5281196105038
1361	PTBP3	0.527886397690674
1362	DHRS9	0.527859031252004
1363	HLA-DRA	0.527817499831545
1364	FUT11	0.527716183174324
1365	TGDS	0.527589620933761
1366	COX6A2	0.527542234059736
1367	KCNJ12	0.527458714846305
1368	MYOM1	0.527402398043044
1369	S100P	0.527266765699339
1370	VAC14	0.526923291931779
1371	PPME1	0.526665946634471
1372	CPNE9	0.526412074091013
1373	ARID1B	0.526207328474186
1374	ISOC1	0.526152300366576
1375	PPP2R3A	0.526030239108832
1376	LDLRAD3	0.525991498165841
1377	P2RY1	0.5259304178646
1378	SPDEF	0.525557810734138
1379	CHI3L1	0.52547051795244
1380	SMTNL2	0.525451090434043
1381	ADAMTS5	0.525418493037971
1382	LIPN	0.525297622811299
1383	PPT2-EGFL8	0.525145477885665
1384	SLK	0.525058000876914
1385	ACSL5	0.524964344205397
1386	IFITM10	0.524942641359283
1387	PTGS1	0.524794941729849
1388	HESX1	0.524772302605643
1389	UBXN4	0.524524021467031
1390	NTRK3	0.524516836178694
1391	C1QTNF7	0.524487781998923
1392	SLC22A5	0.524071570014252
1393	HPSE2	0.524027650539556
1394	TMTC3	0.523805378612539
1395	MARCO	0.523755591546054
1396	SLC25A11	0.523611137201574
1397	MED16	0.523476761513113
1398	MCM3	0.523462058384303
1399	SBF1	0.523202946904923
1400	CADM4	0.522969349092424
1401	MTRF1	0.522947161874515
1402	MECP2	0.522718895986748
1403	DIP2B	0.522699183544621
1404	SRRM3	0.52269227781686
1405	IKBKB	0.522634574563261
1406	SLC27A2	0.52261022350805
1407	MYB	0.522412744246718
1408	S100A14	0.522216731636775
1409	FYN	0.522156209773358
1410	ROBO1	0.521965333351934
1411	EYA2	0.521746549238803
1412	UACA	0.521728405293535
1413	ZBTB7C	0.521524102802063
1414	LRRC16B	0.521354710064383
1415	TRMT61B	0.521350668469068
1416	MST1R	0.521011439451271
1417	ESPL1	0.520949886546191
1418	BIN1	0.520925710093323
1419	GSPT1	0.520887587063581
1420	HAS2	0.520754517746533
1421	ACADVL	0.520353025497629
1422	TST	0.520342490969334
1423	TSPAN8	0.520163659523003
1424	ZHX3	0.519963067385847
1425	NRP2	0.519877877741815
1426	CBFB	0.519861898502125
1427	TFCP2L1	0.519708410650606
1428	CADPS2	0.519573314053836
1429	SLC19A1	0.519509814378085
1430	KIF2A	0.519323691619612
1431	GAA	0.519211873680324
1432	CA3	0.519083562171587
1433	KRTAP20-2	0.518961158354401
1434	C15orf48	0.518757859569102
1435	XPR1	0.518680336587252
1436	FAM174B	0.518590763593952
1437	LGI3	0.51845033589446
1438	LMBRD1	0.518420481609923
1439	RYR1	0.518227417300672
1440	IKZF5	0.518221760736426
1441	LAG3	0.518036447426196
1442	PSAPL1	0.517939282428703
1443	DOCK4	0.517842939192981
1444	USP47	0.517631066325031
1445	FMOD	0.517520259230535
1446	PPP5C	0.517129145161267
1447	ACSF2	0.517042268852163
1448	CA2	0.5169540723691
1449	PRKD2	0.516873039101313
1450	C5	0.516810159501994
1451	SMAD3	0.516635547815166
1452	FMO3	0.516228291736332
1453	CRYM	0.51617823439974
1454	MYLPF	0.515825552584003
1455	HEATR6	0.515649883622087
1456	ABCA2	0.515563471812611
1457	TCF12	0.515557246920793
1458	MRGPRX2	0.515549412577747
1459	HOXB3	0.515517579299209
1460	FBXO34	0.51540738095819
1461	PLA2G4F	0.515321670316894
1462	FBP1	0.515302367629966
1463	CXCL14	0.515180224333721
1464	CD2	0.515074360075761
1465	FOLR1	0.515023156979872
1466	CARKD	0.514933416950016
1467	DNMT1	0.514832991247929
1468	KIAA1984	0.514805702617974
1469	ARHGAP8	0.514601346206788
1470	SLC39A3	0.514553010906817
1471	CCND3	0.514412194475547
1472	PON2	0.514408160461591
1473	TXNDC17	0.514374059076787
1474	CIDEA	0.514251602584655
1475	UBE2L6	0.514200947803975
1476	SLC39A8	0.513717442778216
1477	ARL1	0.513712332559158
1478	VSIG2	0.513630766830274
1479	MCM3AP	0.513612872013048
1480	SHANK2	0.513435272474503
1481	PLEKHG6	0.512929961572332
1482	TPRG1	0.512700455715613
1483	GMDS	0.512673311523118
1484	IGFLR1	0.512543036765745
1485	ZCCHC2	0.512496809630748
1486	CYP2E1	0.512452780793395
1487	BAZ1A	0.512126373078641
1488	TRPM1	0.512121911798661
1489	CCDC149	0.512030767821799
1490	C17orf49	0.511995986377186
1491	TTC18	0.511892836721301
1492	NMI	0.511807364027163
1493	PNLDC1	0.511792811721361
1494	LRIG1	0.511545588268125
1495	TMED5	0.511501564966189
1496	ZCWPW1	0.511388034607065
1497	CPEB3	0.511341540734346
1498	HCN3	0.511297937452361
1499	FOXI1	0.5107819336912
1500	PISD	0.510616072826729
1501	IL20RA	0.510542653719909
1502	GJB3	0.510230031210265
1503	LZTFL1	0.509948424784276
1504	CNTROB	0.50975697102548
1505	MTUS1	0.509656180787503
1506	ZNF287	0.509473877547107
1507	CDK1	0.509406660695259
1508	G6PD	0.509222548705065
1509	SLC4A3	0.509166798077218
1510	SLC24A3	0.509110229140591
1511	SLC25A24	0.50870561181912
1512	DFNA5	0.508704069378333
1513	PASK	0.508544899399183
1514	RAB27B	0.508287366442186
1515	ACAP1	0.508229470183309
1516	TMEM255A	0.508072898858064
1517	LARS2	0.507987960175967
1518	KHNYN	0.507947930517571
1519	ITGB8	0.507763751481282
1520	PCSK1	0.507679361642394
1521	PEPD	0.5076532790355
1522	PAMR1	0.50763366642629
1523	CCDC109B	0.507541540964997
1524	SPINK5	0.507522228673621
1525	GNG12	0.50747972041066
1526	TMEM80	0.507026157375153
1527	SEPT11	0.506374290318527
1528	HIST1H3H	0.506357246309837
1529	UNKL	0.506263105950225
1530	CDNF	0.506252514554969
1531	PPP4R1	0.505985130164956
1532	ANKRD28	0.505762886267105
1533	CCL17	0.505739130434783
1534	NAV1	0.505684949646383
1535	TSHZ2	0.505615994606071
1536	NEURL2	0.505591026008357
1537	RRAGC	0.505432569274352
1538	VIMP	0.504744946056353
1539	SCG2	0.504743888315778
1540	SHROOM2	0.504374240782056
1541	AC062017.1	0.504218393621128
1542	SLC12A2	0.504167814238571
1543	ZEB2	0.503927363204147
1544	DACH1	0.503875580453654
1545	C1orf131	0.503782376535077
1546	PRKCE	0.503585396031709
1547	LMAN1	0.503547548279995
1548	PPOX	0.503536430497933
1549	PLCB2	0.503525039408555
1550	CLDN3	0.503506626647878
1551	PTGDS	0.503049832103046
1552	RAD51D	0.502962016494366
1553	MDFI	0.502924708490186
1554	MMP19	0.502863130702738
1555	C17orf75	0.502809631160082
1556	PPARGC1A	0.502737748513567
1557	KCNK5	0.502724463519471
1558	HOXA9	0.502267862672109
1559	GJC2	0.502053805689381
1560	PKIG	0.501970062397881
1561	RBM26	0.50191000255004
1562	PHLDA2	0.501787509526831
1563	RWDD3	0.501764550105262
1564	DCST1	0.501743780516159
1565	CSF3	0.501550913223463
1566	CRNN	0.501512297282845
1567	SIPA1L3	0.501466373157507
1568	ALDH16A1	0.501260702753511
1569	MUCL1	0.501121990700965
1570	EFCC1	0.501090167403387
1571	HPGD	0.501008601340487
1572	NUP107	0.501006840718644
1573	AGRN	0.500847423222262
1574	NEO1	0.500734810046616
1575	CYP4X1	0.500686379669849
1576	C10orf137	0.500561915588949
1577	C3orf18	0.500451522987604
1578	ATG4D	0.500415982505501
1579	RAVER1	0.500292756020852
1580	MEX3C	0.500141300996814
1581	RSAD1	0.499993428824432
1582	CALB2	0.499566838971406
1583	ABCG1	0.499450013059152
1584	ZNF514	0.499433129317685
1585	PSRC1	0.4993064715858
1586	SMIM20	0.499283664142005
1587	KLC1	0.498924464297333
1588	GATA3	0.498672399733675
1589	EHF	0.498650700886039
1590	FBF1	0.498628904149893
1591	SEMA7A	0.498584125268468
1592	COL18A1	0.498247829530232
1593	TSTA3	0.49804336325575
1594	TRIB3	0.497957115506907
1595	C12orf56	0.497937491514809
1596	FAM69C	0.497937056709787
1597	KLHL36	0.497924225917191
1598	FRZB	0.497869865987973
1599	PNMAL2	0.497679084675095
1600	CACNA2D4	0.497585349372779
1601	GRB7	0.497514811993473
1602	CCDC150	0.497448701544596
1603	TNF	0.49695592786581
1604	DCT	0.496500233317779
1605	PHF7	0.496351583462694
1606	ABHD12	0.496270288675761
1607	ZNF274	0.496169770119035
1608	NSMF	0.49559674112648
1609	AKAP13	0.495550602032662
1610	LEF1	0.495421440653624
1611	AUTS2	0.495408128198315
1612	FAM110B	0.495104027390287
1613	FAM173B	0.494604172851903
1614	CMTM8	0.494506208237118
1615	DIMT1	0.494296812539043
1616	ATP6V1B1	0.494139601691807
1617	XPNPEP2	0.494105668765293
1618	PARP6	0.493977999853974
1619	GOLIM4	0.493970483072788
1620	KLK8	0.49385493938557
1621	OSR2	0.493655815377428
1622	GLRX2	0.493638067042747
1623	PRSS53	0.493606800521465
1624	RIMBP2	0.493531769462181
1625	SLC5A6	0.493483836943517
1626	LACTB2	0.493410401047736
1627	NFYA	0.4933594237895
1628	AP3D1	0.493347837666783
1629	GPR126	0.493319138968804
1630	F5	0.492930070781814
1631	CD1C	0.49289333173413
1632	VAT1	0.492878157706883
1633	TM7SF2	0.492727944397933
1634	STARD5	0.492666394370325
1635	INO80E	0.492471068097071
1636	TLR4	0.492435699255935
1637	FGF2	0.492353594583039
1638	EXD2	0.492291976689484
1639	DENND2D	0.49217107206128
1640	RFX2	0.492089254568306
1641	MOB3C	0.491900225699599
1642	KIF21A	0.491805781581577
1643	EPDR1	0.491521306040489
1644	CHD6	0.491484977833177
1645	BCCIP	0.491194958956971
1646	LYG2	0.49104320337197
1647	LYPLAL1	0.491038591257451
1648	GREM1	0.490809203411826
1649	CENPQ	0.490459224521492
1650	CYTH4	0.490431702075203
1651	CNFN	0.490399130362191
1652	ZBED5	0.490301614856404
1653	PDHA1	0.490210998388196
1654	EFHC2	0.490150085735044
1655	TENM1	0.490121767873463
1656	NKD1	0.48997963893556
1657	CDK16	0.48993027659851
1658	CCL13	0.489915809881042
1659	CMC1	0.48960854851406
1660	FBXO31	0.489076854338754
1661	TRAPPC10	0.488925266860036
1662	MAP1LC3A	0.488823269438347
1663	SLC12A7	0.488785432910662
1664	NLE1	0.488627243242163
1665	HAS3	0.488564935862413
1666	ALS2CL	0.488520791187572
1667	SPATA18	0.488379771976267
1668	SKI	0.488281032474413
1669	DNAJC6	0.488197662327017
1670	C17orf80	0.488166857519809
1671	ARHGEF37	0.488011584348513
1672	CYP2U1	0.487870769720463
1673	CAPG	0.487853153520881
1674	GPX4	0.487256938865401
1675	PLA2G4A	0.487149473349531
1676	VGLL4	0.487132947045472
1677	FBXL5	0.487114326424317
1678	ADRA2A	0.486966545904619
1679	RPS21	0.486727770503511
1680	EFCAB4B	0.486587506568452
1681	RAB25	0.48651983576384
1682	MEOX2	0.486502889963221
1683	RSPO3	0.486441689800445
1684	HDHD2	0.486262293258068
1685	REG1B	0.485979422082991
1686	PRSS23	0.485958490038414
1687	CYBA	0.485934044744507
1688	RILP	0.485780629273073
1689	KCND3	0.485531546099678
1690	MARCH3	0.485440538884292
1691	ATXN2	0.485363200053769
1692	DIXDC1	0.485325025098235
1693	BGLAP	0.4852471594963
1694	TJP1	0.485196991781559
1695	TCF7	0.485110473508154
1696	TAC1	0.484988034632293
1697	RGL1	0.484968399009408
1698	KCNK15	0.484928408982271
1699	ACVR2A	0.484923558889453
1700	CSDC2	0.484823776061749
1701	CLINT1	0.484716196086894
1702	INCENP	0.484620547367748
1703	MPHOSPH6	0.484472197260442
1704	PPIL2	0.484416655382262
1705	SERPINA5	0.484343035434829
1706	TTC39A	0.484315946124332
1707	ABCA8	0.484178239748607
1708	FAM198A	0.484136879767558
1709	TAPBPL	0.484094963158042
1710	KCNIP3	0.484040417466593
1711	GPHN	0.483963822571377
1712	PEX11G	0.483835059662214
1713	SH3TC1	0.483826191641998
1714	IRF5	0.483823497175402
1715	PARP10	0.483748875586301
1716	KY	0.483743821678945
1717	TIGD2	0.483649001209137
1718	CNIH1	0.48353441370913
1719	STAC3	0.483452085469254
1720	PYGB	0.483027939961885
1721	RHBDD3	0.48295523376487
1722	ZNF22	0.482933870885081
1723	GAS2L3	0.482896054361893
1724	STK32A	0.482776314966795
1725	CHL1	0.482766169529526
1726	THRSP	0.48258507001582
1727	PRG2	0.482392014414821
1728	ADPRM	0.482173063770581
1729	RP11-324D17.1	0.482157578612649
1730	LSM6	0.482115797551363
1731	MBD1	0.482041587901701
1732	TBC1D14	0.481995467881365
1733	PLCB4	0.481986966775641
1734	C11orf52	0.481843565206243
1735	CCNB1	0.481819046218238
1736	ZBTB42	0.481373281040048
1737	CKAP2	0.481337061294652
1738	NRN1	0.481254425696618
1739	RAI2	0.480960298471146
1740	CADM3	0.480624160439479
1741	LGALS4	0.480600226912551
1742	PLA2G7	0.480493277876254
1743	REV1	0.480374405187329
1744	HTT	0.480321099321593
1745	TBC1D10B	0.480253721746872
1746	ALX4	0.480190967646931
1747	SNX2	0.480096966588672
1748	DKK1	0.480084976072832
1749	PPP1R1B	0.480063036938334
1750	MAP7	0.479791918014813
1751	TLR5	0.479630273527096
1752	LRRC10B	0.479524204206782
1753	DCLK2	0.479396999269012
1754	SMC4	0.479386148424932
1755	ADCY8	0.47929203539823
1756	CAPNS1	0.479182542667964
1757	SCOC	0.479130591256947
1758	PEX1	0.479087038404571
1759	TACR2	0.479077634911747
1760	MFHAS1	0.478972049014437
1761	TRPV6	0.478791164134273
1762	PCBP3	0.478753918957751
1763	AGTPBP1	0.478691910207778
1764	E2F1	0.478652013102586
1765	PIM1	0.478617119641493
1766	CAPN2	0.478564829618532
1767	PDLIM4	0.4785574633132
1768	PAIP2	0.478101696618914
1769	BMX	0.477974980585792
1770	RBM42	0.477890456736297
1771	SREBF2	0.477874651292973
1772	KLK14	0.477675407512403
1773	TGM1	0.477656790439764
1774	MCOLN3	0.477504870940955
1775	BCDIN3D	0.477123784168973
1776	MICAL2	0.476989778127406
1777	DAZAP1	0.476772377286922
1778	TRIB2	0.476733307108297
1779	ZNRF1	0.476709243918667
1780	WNK1	0.476574117657343
1781	AGR3	0.476567061758209
1782	MEX3B	0.476361683098151
1783	ITGBL1	0.476323835995985
1784	NBN	0.476317445768668
1785	PLD1	0.476169964438186
1786	SPEF2	0.476146593354473
1787	CCNA2	0.475940972148578
1788	PPP1R3G	0.475828065938819
1789	KRT4	0.47536435225032
1790	XPC	0.475047352086446
1791	ORMDL3	0.474994683591231
1792	SEC24A	0.474795975745507
1793	MOSPD3	0.474619274637811
1794	RANBP10	0.474555295290306
1795	PKN2	0.474473222030209
1796	IL2RB	0.474306736934772
1797	PDE4A	0.473903069011553
1798	TAS2R20	0.473731898980247
1799	NOS1AP	0.473565236044528
1800	CAMSAP2	0.473371685051839
1801	CNIH2	0.473349377576149
1802	APRT	0.473044246740056
1803	TSPAN15	0.473023506216107
1804	BIRC7	0.472867869260568
1805	CALML6	0.472796878189086
1806	SH2D5	0.472733721514498
1807	ARFRP1	0.472685511000745
1808	CA12	0.472543434672692
1809	CAMKK1	0.472372719844349
1810	SLC24A1	0.472365548363564
1811	ADIRF	0.472348958404312
1812	SLC45A1	0.472281601128288
1813	HOXD3	0.472124137797067
1814	OLFML3	0.472105971346784
1815	GLRA4	0.472080616478957
1816	PROCR	0.472005597770527
1817	ZNF609	0.471957119864548
1818	GBP2	0.471685081657167
1819	ABCB1	0.47161912531034
1820	RTN1	0.471580299811562
1821	ZFYVE19	0.471578831613681
1822	ATP10D	0.471529782059121
1823	SLC39A6	0.471326241685909
1824	CHST2	0.471258596346329
1825	MTMR11	0.471227288941877
1826	RORA	0.471215942648355
1827	KDM5A	0.470840652039179
1828	WNT3A	0.470528385096321
1829	DPM1	0.470336394740386
1830	MIER2	0.470174455779585
1831	KATNB1	0.470053913427538
1832	MSI2	0.46993506967243
1833	YTHDC2	0.46991168970608
1834	GDPD5	0.469769053513821
1835	CMTM6	0.469488834722783
1836	PBDC1	0.469405544208084
1837	KRTAP17-1	0.469358669833729
1838	MPND	0.46930553915809
1839	CTNNB1	0.469245417572543
1840	MRPL19	0.469161031470602
1841	POPDC2	0.469109145937613
1842	LANCL1	0.469102490097219
1843	ADK	0.469096859131278
1844	PTCH2	0.46904530182883
1845	SPRED3	0.469027804192021
1846	PIM3	0.468370374336187
1847	PRKCDBP	0.468277228376704
1848	ZNF436	0.468255940102775
1849	PLA2G1B	0.468069299109419
1850	CDH24	0.467890192287238
1851	SORL1	0.467843508581374
1852	MFSD2A	0.467780916446621
1853	CD14	0.467576815212709
1854	GTF3C1	0.46756191894276
1855	ACAA1	0.467508161630059
1856	MTSS1	0.467491752945365
1857	HPX	0.4673923650724
1858	DNMBP	0.467346047115226
1859	IMPACT	0.467307661811016
1860	SCNN1A	0.467296920799033
1861	NPTX1	0.467252227895161
1862	TFAP2E	0.466927241138228
1863	ADORA1	0.46691089538122
1864	ZNF496	0.466862994654501
1865	SCAF4	0.466845982168565
1866	LTB	0.466690756580655
1867	PTPN9	0.466513848852236
1868	RGL3	0.466283418123764
1869	PLD2	0.466137907497455
1870	IKBKE	0.46590168280383
1871	SYDE1	0.46587026270099
1872	ZNF423	0.465809076763293
1873	UGP2	0.465675698468307
1874	HTRA3	0.465327444576178
1875	CELF1	0.465309411983986
1876	SMAD2	0.465296987742231
1877	NOX1	0.465166130760986
1878	CDKN1C	0.464614012973837
1879	FAM109B	0.464467560509461
1880	ATG2B	0.464383364690799
1881	PLK4	0.464371436080362
1882	PTPN13	0.463833801066982
1883	VWA1	0.463775453643055
1884	RCBTB2	0.463450773076564
1885	PGAP1	0.463411364722977
1886	NPR1	0.462924073842883
1887	SLC2A12	0.462915302713091
1888	INVS	0.462825391146898
1889	RAPGEF3	0.462729647192023
1890	BBOX1	0.462721295541059
1891	TRMT1L	0.462556937712144
1892	ANKRD46	0.462429669731098
1893	ITGB4	0.462410729763451
1894	NOSIP	0.462213768381008
1895	HTR3A	0.462208177520228
1896	MAK16	0.462154432542934
1897	STRADA	0.462154319438414
1898	TLN2	0.462146306125575
1899	PSMF1	0.462126621619087
1900	MCTP2	0.461699025307695
1901	RIN3	0.461654109058234
1902	CFDP1	0.461653296645081
1903	DAAM1	0.461630350661183
1904	SLN	0.46153782185295
1905	KHDRBS3	0.46151611509801
1906	ZBTB38	0.461323338093345
1907	FETUB	0.461316974527164
1908	ELOVL1	0.461274866980668
1909	ARHGAP6	0.461214224189428
1910	CTC-360G5.1	0.461204117422499
1911	AADACL3	0.461134328358209
1912	CLDN1	0.460757241935758
1913	PLXNC1	0.460631660441199
1914	POSTN	0.460474046808365
1915	SMIM22	0.460370192168343
1916	PLCH2	0.460315878470693
1917	KIAA1324	0.460247142509627
1918	MORN2	0.460221256098853
1919	TRIAP1	0.460174177697511
1920	PSMD11	0.460094539180706
1921	MERTK	0.459882056021318
1922	PPWD1	0.45980957391806
1923	ZFAND2A	0.45966968690499
1924	WDR4	0.459426600132103
1925	ACRBP	0.459425275489104
1926	SERINC2	0.459369779458202
1927	PRKCB	0.458958281108789
1928	SORBS3	0.45890279693213
1929	LMAN2L	0.458819406397777
1930	FNIP2	0.458770611629449
1931	TNC	0.458103596087817
1932	GABRA4	0.45809709255341
1933	FARSA	0.458008568140268
1934	PIK3R6	0.457966670821046
1935	FBXW7	0.457701870253281
1936	STXBP2	0.457694176865273
1937	ZC3H7A	0.457636433558411
1938	WDR52	0.457495173339809
1939	SOX4	0.457107895327709
1940	HSPBP1	0.457067115977716
1941	NOSTRIN	0.456996365516945
1942	WBSCR17	0.456728533851155
1943	NSUN7	0.456635207618927
1944	VCAM1	0.456286355832378
1945	TMEM71	0.455894718104597
1946	SLC25A35	0.455847923044685
1947	BEX5	0.455513570722576
1948	GNAO1	0.455411476390598
1949	CCL26	0.455403116944658
1950	B4GALNT1	0.455339463103721
1951	MRPL1	0.455316127697983
1952	THEM6	0.45524144279715
1953	SERPINI1	0.455227972064898
1954	MNDA	0.455174119063102
1955	COL1A1	0.455065615837878
1956	TMEM246	0.455034552347383
1957	LTBP1	0.4549920176839
1958	P2RY2	0.454978908261181
1959	NME3	0.454822628370205
1960	WAS	0.454776033451689
1961	NAA20	0.454756282046801
1962	NSFL1C	0.454659436852258
1963	TGFBI	0.4546575259409
1964	CERS2	0.454551948432838
1965	TMED7	0.454493031260834
1966	NFKBIE	0.454477657202372
1967	RAE1	0.454410120534845
1968	LBR	0.454251496398683
1969	CNTRL	0.45415816009003
1970	ALB	0.454115585227098
1971	SIGLEC6	0.453989486945275
1972	BCAS1	0.453953868644077
1973	ZCCHC14	0.453876350050803
1974	BARX2	0.453870267904576
1975	ATP13A1	0.453830379283681
1976	HN1	0.453604394038052
1977	HOXC9	0.453589577786307
1978	IFT43	0.453530322946945
1979	CXCL3	0.453290883364933
1980	IRX3	0.453106507999825
1981	SLC1A7	0.453041138570988
1982	PICK1	0.452957565086406
1983	CTNNAL1	0.452923215890326
1984	REXO2	0.452846669530311
1985	PCNT	0.452782498358018
1986	OS9	0.452722771167656
1987	POGZ	0.452669507797108
1988	TAF7L	0.452584624492011
1989	PRDM1	0.452569491127977
1990	CLCF1	0.452560040500159
1991	PCCA	0.452418155345445
1992	STK17A	0.452395848540441
1993	EIF3G	0.452367555086615
1994	INSR	0.452226261742057
1995	RAP2C	0.452180287553357
1996	NPR2	0.452179274853061
1997	FGFR4	0.452033842887842
1998	GAS7	0.451496266676719
1999	ATP6AP2	0.45142068667167
[truncated: 8,009 more rows]

## Sheet: Group1 (IR-TE)
rank	hub	r
1	EDF1	0.9944823962165
2	ECI1	0.990770042194093
3	KRT73	0.98218085106383
4	IGFL2	0.976874749365058
5	TP53AIP1	0.976327404039053
6	CAPN12	0.951937559906888
7	LMO1	0.951219512195122
8	GDPD2	0.949780461031833
9	CYB5R1	0.94743239124146
10	PPP1CC	0.946600605560143
11	VPS36	0.944915986275692
12	ZFYVE26	0.944858009374138
13	TREX2	0.944685893209911
14	KCNJ12	0.942817679558011
15	BCL11A	0.942686977496918
16	GLT8D1	0.941648230088496
17	PMEL	0.939154539154539
18	PRSS53	0.932205665984772
19	C2orf82	0.931439723319774
20	ZNF711	0.930936188163724
21	EPHB1	0.929255576379726
22	NRG2	0.926913599229451
23	CENPM	0.918165721032563
24	ENGASE	0.905894552735579
25	SRPR	0.905676537625139
26	KLK13	0.904693760732685
27	MYH10	0.899170779516196
28	SLC1A6	0.895845354875938
29	MFSD2A	0.894231030815803
30	TP73	0.8858232647011
31	CORO1C	0.885579999727219
32	WNT10A	0.878534798534799
33	WDR66	0.875393830896497
34	SOX15	0.874571320872093
35	IRX3	0.87318549639292
36	TOM1L2	0.867161782629284
37	EPDR1	0.864054615612942
38	MYLPF	0.862366230677765
39	SH3PXD2B	0.857611940298507
40	ZDHHC9	0.857207849746276
41	PRDM10	0.85126819750863
42	TMPRSS13	0.851054847384726
43	KRT80	0.850031049251701
44	HMBOX1	0.849195609682755
45	PGAP1	0.848859985134578
46	FAM132A	0.848289600399457
47	PAK6	0.847239759264192
48	DSG1	0.846562400630711
49	CLUH	0.84427405860969
50	MON2	0.838578237383462
51	ATP6V0A4	0.83677811550152
52	MED13L	0.834601281940422
53	ADH6	0.831229299863462
54	SERPINB8	0.830504364310659
55	C19orf43	0.829161977418734
56	TEC	0.82858891949801
57	COL13A1	0.827911495271993
58	BEST2	0.823728292607961
59	NPAS1	0.821789703243867
60	SPTSSB	0.819373746722197
61	SERPINB13	0.819009412127758
62	CSRP2BP	0.819002149657823
63	C1orf116	0.818266452433125
64	CTTNBP2NL	0.814460551097656
65	KCNK7	0.812228429546865
66	WNT3	0.811837011032092
67	SGMS1	0.81112146629388
68	PM20D1	0.80778816199377
69	IL37	0.807416640698037
70	AASDHPPT	0.806884987486816
71	SLC22A15	0.805812502114961
72	TMCO6	0.80272223938995
73	SLC16A11	0.80068943904732
74	PDE4B	0.798890368909369
75	MDN1	0.798883054595511
76	COQ2	0.797351635040817
77	RP11-295P9.3	0.796806586254461
78	MRPS6	0.793902012947718
79	ATF5	0.791785248801251
80	LY6G6D	0.791028273574475
81	HOOK1	0.788184820468062
82	LIPM	0.787581181688579
83	PFKFB4	0.787323565549846
84	ADCY2	0.785790978105843
85	EGR2	0.785272179019203
86	C15orf61	0.785257446600311
87	PEX11B	0.784249712763249
88	NUSAP1	0.784221752184939
89	HADH	0.781985996180777
90	PPME1	0.78066306356518
91	LANCL2	0.780537098091794
92	METTL10	0.779430198226589
93	PLA2G4D	0.7792663476874
94	KCNN4	0.77921383421631
95	CDHR1	0.779131820378975
96	C2CD5	0.776489062321068
97	ALDH3A2	0.776318489578412
98	PKMYT1	0.775894926362117
99	TEX264	0.775665342456179
100	NKPD1	0.774967989756722
101	ESYT3	0.774771890507444
102	AKAP9	0.774235202924872
103	MACROD2	0.773593975324467
104	ASIP	0.772610647851187
105	GRHL3	0.76710433975044
106	ATP10B	0.764115018508309
107	RRAGB	0.762574540424698
108	CCNE1	0.762489894907033
109	PLA2G4F	0.760728283751043
110	TRIM26	0.75987161786214
111	BCAN	0.759481361426256
112	TYRP1	0.759280272329389
113	HDAC11	0.758847727231521
114	GJB3	0.757955292257579
115	SPEN	0.757011132366533
116	LAMC3	0.754757588268264
117	SMYD5	0.754028976070324
118	CIDEA	0.753634567956693
119	C19orf26	0.753144032967911
120	GRID1	0.748323793949305
121	TRAPPC13	0.748316286427851
122	WFIKKN1	0.747914281040406
123	MUC15	0.746957463408396
124	SMIM13	0.746879625111895
125	MED8	0.746658872369617
126	MAF	0.745697896749522
127	PPP1R13B	0.745541295072295
128	C16orf80	0.74510720733218
129	CNNM2	0.744965329287342
130	CXCR4	0.744449978162535
131	NAT6	0.74443082140438
132	PACSIN2	0.744114364068016
133	FAM98A	0.740941484354362
134	CNTFR	0.740682322132115
135	PHF20L1	0.734898494420567
136	CENPP	0.734788789245538
137	MAPK15	0.731422174632532
138	RAD23A	0.731022325024706
139	MRPL17	0.730908586945194
140	MNT	0.730762940530447
141	ANKRD28	0.730720970850744
142	EFNA5	0.729456768703934
143	MCAT	0.727929117156943
144	CWH43	0.72788857231743
145	HDAC4	0.725005699096865
146	ATP7A	0.724546474985241
147	LYPD6B	0.724025850002739
148	ETV7	0.723269732578434
149	ZBTB11	0.717922948073702
150	ZNF646	0.716710438737135
151	MIB2	0.715205112222315
152	AQR	0.714583321490516
153	CHTF18	0.712875675494248
154	TPCN2	0.711274570857114
155	AKAP13	0.71070980524634
156	AP4B1	0.710460811982051
157	SERPINB7	0.710124352910929
158	DDX20	0.710065351590115
159	C10orf128	0.709899975480347
160	RC3H2	0.709474759838782
161	EZH2	0.70857242268127
162	PGAP3	0.708294981693699
163	AQP3	0.708283401486003
164	USF2	0.708185194594182
165	HAL	0.707749451291575
166	AGPAT1	0.706179016404977
167	TCF7L2	0.705160800449004
168	C1orf162	0.704774068511027
169	CCDC19	0.704608615934256
170	SLC25A11	0.704468517264726
171	DLG2	0.702205202778093
172	FBXL15	0.701457591118483
173	PPARGC1A	0.701225737965
174	SPRED2	0.701104318589538
175	ZNF184	0.700729927007299
176	NME3	0.700526511098496
177	EFHC2	0.700061708388726
178	LEF1	0.698169267506338
179	ERAL1	0.697467457737629
180	ZCCHC14	0.697312292479744
181	SLC39A6	0.695684732622921
182	LTBP2	0.694196066066891
183	FBXL16	0.694174059340941
184	WWOX	0.692885846239596
185	SORBS3	0.691739439017622
186	MRGPRF	0.691568337964384
187	MARK2	0.69143145427189
188	CNOT2	0.691036985208156
189	GAS6	0.690952447901684
190	FAF1	0.690611927900998
191	ITPR2	0.69029134622981
192	SLC26A10	0.690178291589752
193	C15orf59	0.688961797559348
194	CDK19	0.688893553158711
195	AURKB	0.688229048109403
196	DERL2	0.688096613060753
197	RPAP3	0.68758767927816
198	RNF40	0.687112965387462
199	AP1S1	0.686876439689874
200	EHF	0.686008583690987
201	SNX16	0.685439182608333
202	VSIG10L	0.684843177207833
203	MED10	0.684657761288522
204	PTOV1	0.684419930756237
205	PLEKHO1	0.683879136206865
206	ABCD3	0.682449925494866
207	GPR107	0.681055979214917
208	KPRP	0.679661894083146
209	PTPRZ1	0.679437578618324
210	POLR2G	0.678890759591871
211	RHOC	0.678278403910955
212	MAP7	0.677707673427362
213	ETV3	0.677561262911281
214	RMI2	0.677352264218962
215	KIAA1109	0.676465502334428
216	KLK8	0.676320264381952
217	ARVCF	0.676214467299822
218	ALKBH6	0.675496377525139
219	DENND4B	0.675296374448494
220	IDH3G	0.675213618019958
221	PRRC1	0.675122974496464
222	PLAGL1	0.674206781529959
223	CD164L2	0.674172873722501
224	GCN1L1	0.673467560635503
225	PSCA	0.673061116176673
226	TLE3	0.67289047251838
227	ADAT2	0.672506025512903
228	MAPKAPK5	0.672498166785634
229	SLAMF8	0.672142570089876
230	CARD18	0.672102706453852
231	PTPN21	0.671969587754959
232	DHX29	0.671565611864035
233	EFNA4	0.670682666453102
234	ARHGAP40	0.670401589015322
235	LY6G6C	0.670078815262564
236	NLRP10	0.669563705892578
237	TMEM131	0.6691682910149
238	HEXA	0.669028285313353
239	TBX15	0.668784016204914
240	PLEK2	0.667479108635098
241	PLEKHG4	0.666815321130482
242	CYR61	0.666330710887421
243	MATN4	0.666085744161729
244	FGF11	0.666085556690835
245	PAQR6	0.665646463237007
246	KMT2A	0.6650633410602
247	TBC1D10A	0.664599676524366
248	TMEM106C	0.664367987612294
249	CCNB1	0.663809554863032
250	IL1RN	0.663311616345329
251	MED14	0.662759184839489
252	TFE3	0.662489373091092
253	FAM208B	0.662276074751373
254	COPS3	0.662061348188722
255	THY1	0.661660427584604
256	ACBD6	0.661172690772367
257	WDR52	0.66040261088466
258	CHAF1A	0.660248555925083
259	YIPF2	0.660081908560963
260	TRAPPC10	0.65893521583089
261	RNF43	0.658604977216965
262	GRB7	0.657562060586405
263	RIPK3	0.657467635504232
264	SEC23B	0.657025376039729
265	CHD2	0.656212760656471
266	FAR2	0.655728072219053
267	ZG16B	0.654766110439235
268	SMYD2	0.654402069775231
269	ARHGAP35	0.654118974210934
270	PPP2R2B	0.65362708190546
271	IL1R2	0.653602368804005
272	TSN	0.653392909630571
273	KMT2E	0.653265402150141
274	NELFCD	0.65291153914818
275	KLK6	0.651026011045963
276	COL6A2	0.650982778312544
277	PDS5B	0.650950087618923
278	MIS18BP1	0.650444469542091
279	CDK20	0.65041874269075
280	KRT23	0.650299342142322
281	CYP2E1	0.648522743905719
282	MED13	0.648433735439523
283	SLC25A17	0.648378243288117
284	NCF2	0.647837095816624
285	ETV4	0.647186789603629
286	RAB8A	0.646613672496026
287	SMARCB1	0.646349614129818
288	CYFIP1	0.646261014592742
289	VPS4A	0.64607383015139
290	ILVBL	0.645920821695428
291	ATIC	0.645345020886517
292	OSBPL6	0.644377861850457
293	JMJD7	0.643653715900761
294	NOTCH3	0.64290780141844
295	NUP107	0.642897712638869
296	ZNF410	0.642326137015794
297	ERI3	0.641553844150185
298	CACHD1	0.641280100215726
299	EXOC1	0.641080237975857
300	C11orf49	0.640714692763034
301	USP21	0.640083721764527
302	MAU2	0.639956891852153
303	SCUBE2	0.63989028251058
304	L3MBTL1	0.639827482522739
305	PLP1	0.639800383291857
306	TOP1MT	0.638853842573499
307	CUL3	0.638387334629283
308	DCAF15	0.638216899927077
309	ATAD2B	0.63648849112562
310	C11orf35	0.636163989556394
311	BRPF1	0.636160332643791
312	ZBTB48	0.635458882352105
313	PRCC	0.635392801642531
314	BIRC2	0.634364926748633
315	MRPL47	0.633695337397787
316	RFC4	0.633314302615587
317	AAMP	0.632650861345057
318	TTLL4	0.631191845073724
319	CKAP2	0.629925145186696
320	TUSC3	0.629887138611915
321	YDJC	0.629872269135662
322	ZWINT	0.629619177107287
323	CCDC174	0.629340586524734
324	CMTR2	0.629297994269341
325	FER	0.628658406650938
326	BTBD11	0.628609099465335
327	MITF	0.628206806667174
328	RABEP2	0.627690933063953
329	PEX16	0.627587410890665
330	CUL2	0.6275338185939
331	VTA1	0.627481578957348
332	ST7L	0.627329488126451
333	BCL3	0.627286513399387
334	SF3A2	0.62720639725642
335	CAMK2G	0.627087621965404
336	LRPPRC	0.625842605042778
337	SEMA4G	0.625359195402299
338	CEBPG	0.625346016009848
339	KLK5	0.625177090494448
340	ALDH3A1	0.625165703786123
341	TSPAN33	0.624771966799187
342	SPTBN5	0.624462446957106
343	FAM102A	0.62416186609188
344	ZNF420	0.623063404748945
345	DYNC2H1	0.622726799115961
346	PACS1	0.622307988334336
347	TRAF3IP3	0.62220943447321
348	ALG3	0.622142214221422
349	FCHSD1	0.621710007284353
350	SLC35B1	0.620893568736626
351	LYSMD4	0.620680319801158
352	TFAP2A	0.620334988526556
353	SQLE	0.620084070184304
354	IRS1	0.619899487153121
355	RNF44	0.619849141054703
356	MVD	0.619843411803641
357	SLC6A1	0.61965734896303
358	ASXL1	0.618646553313766
359	HAO2	0.61841155234657
360	IGSF9	0.617701747813501
361	MPP7	0.617338977644489
362	HAGHL	0.616679723698414
363	PPP1CA	0.616084107376043
364	KLHDC8B	0.615831085494746
365	KATNA1	0.615719703993033
366	MAP3K7	0.615713565433512
367	PSMC3IP	0.615677276855978
368	MFAP3L	0.615673478201268
369	MAPRE3	0.612794835155221
370	AGFG2	0.612556027193934
371	IMP4	0.612398778837917
372	PLB1	0.612327076433724
373	TNNI3	0.612040582272889
374	PTPRK	0.611896098421808
375	TOMM40L	0.611787442132236
376	COL9A3	0.61155430533769
377	TRAF4	0.611506073739651
378	TEAD4	0.611475782985032
379	LINGO1	0.611388352991212
380	SMG9	0.610324908922234
381	THAP8	0.609948479256709
382	KRT78	0.609093421645011
383	FCHSD2	0.608673097664575
384	FGFR3	0.608623902726424
385	ALDH16A1	0.608542443927875
386	SMC1A	0.608363878543998
387	MVK	0.608131841427988
388	NR2C2AP	0.608034972332135
389	SERPINB6	0.607803674338391
390	LRRC16B	0.607604147716936
391	CAST	0.606585788561525
392	PARP3	0.606126587013167
393	EPN3	0.60547670088412
394	C12orf52	0.605113456354128
395	INO80	0.604945086150502
396	SCFD2	0.603993393555297
397	LGALSL	0.603446635629789
398	OVOL2	0.603209482026338
399	SUPT20H	0.603142376907086
400	FAM183A	0.602519627533321
401	SLC19A2	0.602257711380339
402	PPP3CA	0.601520877664425
403	PI16	0.600993805966287
404	DCTN1	0.600304662867955
405	FBRS	0.600228183727118
406	HPS4	0.599461912235762
407	GLUL	0.599136758200546
408	UBFD1	0.598784931052773
409	TYMS	0.598387667432161
410	ECSIT	0.598296241534939
411	IGSF10	0.598289795914167
412	RAB40C	0.59810475973835
413	POGLUT1	0.597397837639729
414	SLC12A6	0.597339928364664
415	FAM179B	0.596553569897192
416	MYOF	0.596168587126679
417	IL1RL2	0.595853971748303
418	EIF3G	0.595608358766373
419	KIAA1468	0.595579872040021
420	HES1	0.594733300516864
421	LCP2	0.594374350640323
422	SMC4	0.594273447570257
423	SSX2IP	0.593987409115938
424	C2CD2	0.59381906455956
425	NFIX	0.59370361668512
426	USP19	0.593086640396381
427	ARHGAP32	0.592666263905088
428	IP6K1	0.592446135002194
429	MIEN1	0.592331569075175
430	RPUSD4	0.592099470949208
431	AGA	0.591925551402324
432	ZNF584	0.591684121694661
433	HSD17B2	0.591519721989286
434	LYVE1	0.591461170408539
435	PINLYP	0.591255111670337
436	CYP4F22	0.59115077274927
437	TRIT1	0.591045986233469
438	KRT79	0.590838389028405
439	TGIF1	0.589884405044723
440	WDR46	0.589620115624202
441	HCN3	0.588184055666407
442	UPRT	0.588170811395657
443	TDRD7	0.58754440571171
444	OAS1	0.587494831720193
445	EMP1	0.58731713875188
446	SMOX	0.587253139039176
447	SGSH	0.584541904376133
448	GRAMD1C	0.584408311355119
449	FZD6	0.583070841936746
450	RANBP9	0.582780286680831
451	EIF5B	0.582693286514854
452	MED26	0.582632099015015
453	ZC3H15	0.582137735074611
454	ABCA4	0.582067432382364
455	TCHP	0.581847626915268
456	UCP2	0.581254086324584
457	IGFL4	0.580752827739663
458	C2orf43	0.580174148725906
459	AK8	0.579962894248609
460	CDKN3	0.579740638650865
461	TRERF1	0.57973733525733
462	CCDC77	0.579406253079312
463	ANXA4	0.578996173238663
464	RRAD	0.578642355526838
465	C1orf21	0.578365440465683
466	DDAH2	0.577542025871005
467	CCDC102A	0.5773355172162
468	BRAT1	0.577327951831678
469	GGA3	0.577194861071716
470	ELP5	0.576894249474923
471	JMJD8	0.575959331569721
472	CTNNBL1	0.573420419964278
473	ENY2	0.573276771292307
474	MGME1	0.572323745903124
475	EIF1B	0.571617686842264
476	ARL15	0.571169872645463
477	JUND	0.571119542309755
478	COL7A1	0.570989514723377
479	DHCR7	0.570837031203033
480	HIVEP2	0.570160709651674
481	PHF11	0.569812690860827
482	SYNJ1	0.569702275112367
483	ENOPH1	0.569541710649278
484	PGAP2	0.569387311908501
485	C1R	0.569193284446236
486	KCNK1	0.569078332398579
487	GOSR2	0.569012364015403
488	ZC3H18	0.568526456022223
489	FADS2	0.568353304994251
490	TTC38	0.56798666521433
491	NDFIP2	0.567724591035946
492	KPTN	0.567623652650154
493	RFXANK	0.567388312967113
494	REPS1	0.567118427771329
495	ZFAND2A	0.566796005498757
496	ZNF467	0.565828347558606
497	GMNN	0.56570798022163
498	TRAPPC6A	0.565651474342117
499	CORIN	0.565647475965222
500	RNF111	0.565554123542432
501	TRMT1	0.565434110179708
502	FMN1	0.56503739132153
503	RPUSD1	0.564095916374052
504	BAP1	0.563421472672186
505	ERRFI1	0.563237797076716
506	CCT2	0.563114000235969
507	SENP1	0.563010877839828
508	FASTKD2	0.56287627978677
509	MFSD6	0.561848863965264
510	CERS3	0.561802271758781
511	ARAP2	0.561788390905667
512	PARP16	0.561620399582624
513	TJP3	0.561326073585209
514	ETNK1	0.561028177874131
515	SPINK5	0.560181522999671
516	STX18	0.560014197492135
517	TAPT1	0.558835793501439
518	KIAA0895	0.558706270056653
519	LRP4	0.55862161819124
520	PLAUR	0.558166364785554
521	TFAP4	0.557884852740377
522	KAT5	0.557195903530365
523	PISD	0.556785304477272
524	POLR2A	0.55634814071696
525	INCENP	0.555560110910915
526	PADI1	0.554932775804678
527	IGF1R	0.55490015393521
528	NAE1	0.554757378784605
529	FOXM1	0.554701353310499
530	THUMPD2	0.554351663544993
531	ANO6	0.554009261792521
532	LPAR5	0.553665910808768
533	FAT2	0.553525464856783
534	PSMB8	0.553078637154528
535	FTSJ3	0.552760656022483
536	WRAP73	0.552760543903737
537	MFSD7	0.55234970357679
538	AMDHD2	0.551673352324477
539	LAMA3	0.551499510119554
540	IRX5	0.551201968578459
541	CECR5	0.551128294868389
542	MAL2	0.55085886257002
543	TTC18	0.55074372364391
544	PUM2	0.550619614984197
545	PPP6R3	0.55047252395272
546	SLC39A11	0.550143873797381
547	RBM22	0.549914165536957
548	L3MBTL4	0.549731472420509
549	LRRC1	0.54955512917156
550	GYLTL1B	0.549529715213238
551	CAAP1	0.548873448143344
552	ZNF521	0.548454390290157
553	ZNF34	0.547852550621948
554	EPHX3	0.547844649832542
555	MCTP2	0.547580553830709
556	DPH2	0.54704027055208
557	MCTS1	0.546813768374731
558	SLITRK4	0.546488428213319
559	SERPINF2	0.545437217755596
560	IL36G	0.54542791648157
561	LEMD3	0.545243196463009
562	MIOS	0.544883122396182
563	GLCCI1	0.544080785707448
564	PIK3C2G	0.543947759407735
565	C3orf17	0.543616622987645
566	SHROOM2	0.543550673513563
567	SKIV2L	0.543350508791632
568	KRT13	0.543202303312593
569	COMTD1	0.543076804659214
570	WFDC3	0.542751163554605
571	PRIMPOL	0.542482573300018
572	TRIP6	0.541935590202012
573	ZFP36L1	0.541762307176111
574	WRN	0.541642660222751
575	ATP6V1B1	0.541437071416877
576	GAB1	0.541006066676607
577	VSNL1	0.540983606557377
578	GSTZ1	0.540651962274711
579	TRPV6	0.540028768729159
580	ADORA1	0.539702515307689
581	MAP3K10	0.539591680976913
582	USP30	0.539149568250696
583	ASAP3	0.53888669346214
584	CRISP3	0.538636793569109
585	CNOT1	0.538335709735672
586	INTS1	0.538244119441383
587	TINF2	0.53822017287496
588	GDE1	0.538071126948705
589	BEX4	0.538035117283674
590	ZNF644	0.537890812564707
591	E2F4	0.537715214735756
592	HDC	0.537702701168427
593	TRIM7	0.537650925402819
594	SDK1	0.537618738011343
595	GAA	0.537471046518031
596	FERMT1	0.537359067456526
597	C16orf91	0.53656318072306
598	USP1	0.536501944692061
599	MLH3	0.53620827647121
600	TG	0.536205833544804
601	KCNIP3	0.536134388229725
602	RAB11FIP4	0.536063372830686
603	IGFBP2	0.536008835875656
604	FAM229A	0.535475984930804
605	COL17A1	0.535063624735089
606	NR2C2	0.534907976589514
607	EGFR	0.534647479824097
608	SERPINA9	0.534558682749378
609	PDCD11	0.533853213521532
610	ADAD2	0.533716475095785
611	C19orf66	0.533642308866667
612	ZNF623	0.533364997197322
613	SCAMP3	0.532554596183219
614	SLC26A9	0.532386944492062
615	ITGB7	0.532364797199623
616	EDNRA	0.531862318633295
617	IKBKAP	0.531807725691246
618	SPINT2	0.531623274931958
619	MTERFD2	0.531019326643785
620	IL17RE	0.531013263648899
621	ATL2	0.530909472448543
622	MLIP	0.530526514649147
623	NIF3L1	0.530508553057143
624	ESYT1	0.530489696274407
625	WNT16	0.530337941628264
626	FUT8	0.530335364695829
627	CACFD1	0.529907347364852
628	MLEC	0.529523302880089
629	SHOC2	0.52944175666967
630	TEFM	0.528999474765572
631	OPN3	0.528933007582015
632	BIRC6	0.52890846782496
633	NTHL1	0.528076205664889
634	EXT2	0.527793455659214
635	MDFI	0.527690620958773
636	IL1RAP	0.527680042958957
637	SNAPIN	0.527064532244882
638	TRAP1	0.526627151736093
639	RNF39	0.526111274620384
640	KIAA0020	0.526017209697757
641	RNMT	0.525540065454522
642	STK36	0.525477254944308
643	UBQLN1	0.525333616259624
644	ABCC4	0.5252408477842
645	ALG8	0.52516605832831
646	CDC73	0.525127812832331
647	AHDC1	0.525069682165979
648	COBLL1	0.525043800259257
649	TMEM222	0.525001547018688
650	POT1	0.524930249614431
651	PSMD1	0.524646654471841
652	AASDH	0.523753816006492
653	LEPREL1	0.522885277550299
654	TSPAN8	0.522878175718082
655	NEO1	0.522762310900124
656	PITPNM1	0.522733267553728
657	LRRK1	0.522717123469057
658	ODF3B	0.522351170953271
659	RWDD3	0.522160674303478
660	ATG16L2	0.522115265976851
661	SLC20A1	0.521732100823498
662	DKC1	0.521658030467479
663	DACT2	0.520680324700425
664	OLFM2	0.520592036588207
665	PI4KB	0.520011601792546
666	NFE2	0.519940399537217
667	RASSF7	0.519383327575399
668	PSMC4	0.519201505598674
669	AP3D1	0.518981201211159
670	PER3	0.518930305956954
671	RAB15	0.518925606750097
672	DHX58	0.51789078898169
673	C19orf24	0.517845956785348
674	PPT2	0.517760704575705
675	ERMAP	0.517480509063931
676	TGM5	0.517273050652189
677	TANC2	0.517049274525161
678	FAM214A	0.517028675773728
679	SLC37A4	0.516843970780422
680	TRRAP	0.516701528694799
681	PSORS1C1	0.516630474509866
682	EDC3	0.516251633062989
683	FECH	0.51505069069818
684	RND3	0.514839640611567
685	GPN3	0.514452080878092
686	TRAPPC8	0.514016857108528
687	ATXN7	0.514006102554269
688	DUSP14	0.51380492860815
689	SYBU	0.513694932421134
690	MAP3K5	0.51362732102026
691	DNMT1	0.513366788439273
692	PALMD	0.513125817858486
693	NR1H3	0.512626101826365
694	ARHGEF26	0.512611404506102
695	TCERG1	0.512114141016219
696	GLMN	0.511892749786599
697	NPRL2	0.511580917881926
698	OSCP1	0.511253970595054
699	SLC28A3	0.510908987755498
700	EML2	0.510842036769313
701	S100A8	0.510511083602087
702	DUSP2	0.510487144445896
703	KAT6B	0.510406252840135
704	JHDM1D	0.510248447586616
705	SIKE1	0.510190709526847
706	WEE1	0.510045752048519
707	GATAD2A	0.509352585572493
708	FRMD6	0.508968946369029
709	CDCA7	0.508844214859089
710	CHD8	0.508793151969158
711	FARP1	0.508770346402666
712	BCS1L	0.508199474422205
713	IFNGR1	0.507822108090033
714	DUSP3	0.507578943773893
715	MTHFSD	0.507486973193747
716	C21orf91	0.507448221092368
717	IDE	0.50743590184177
718	FMR1	0.506998952657428
719	TPRN	0.506811968742069
720	SEC14L2	0.506700329830152
721	GTF2A2	0.506449778349565
722	PUF60	0.505356634646594
723	ACYP1	0.505234211205423
724	NRM	0.504862537824046
725	UNC50	0.504581954670084
726	ELL3	0.503942796270041
727	HSPBP1	0.503889991733596
728	ALG6	0.503592153359015
729	DOPEY1	0.503588270326134
730	NUDT14	0.503544696875364
731	ARG1	0.503361055932794
732	SMAD4	0.503048754153924
733	FAM213B	0.502997036746518
734	CCS	0.502714407317461
735	OGFOD2	0.502393844221225
736	EXOSC9	0.502314548493852
737	CREBRF	0.502248942061958
738	PPP1R10	0.50206828857884
739	TUBA4A	0.501944180221356
740	VPS52	0.501862410960646
741	NUP54	0.501830919664861
742	JAK2	0.501692853095933
743	FANK1	0.501653692894677
744	EPHB6	0.501629079884186
745	KREMEN2	0.501566170712608
746	ZNF507	0.500699999525229
747	PPP1R3E	0.500640325481297
748	DIMT1	0.500546344470159
749	HAUS4	0.500243135756919
750	RAB3GAP2	0.499964965801232
751	ROBO1	0.499551254527711
752	CPOX	0.499477674759943
753	RAB31	0.499407902406799
754	PPIL2	0.499328185908614
755	ATL1	0.499260068045842
756	C12orf66	0.499123862361638
757	LZTFL1	0.499024433251301
758	CTDSPL2	0.498617999970187
759	ZGPAT	0.498144718832312
760	B4GALT7	0.49775415258507
761	MMRN1	0.497280576502401
762	PGS1	0.497255461985842
763	VAV3	0.497135344939951
764	TSC1	0.497093024817356
765	RSRC2	0.496969702005307
766	PPP2R5D	0.496825713083035
767	FAM219A	0.496652276109006
768	HACL1	0.496465537162896
769	NR2F2	0.496133671903801
770	TFF3	0.495527348563649
771	SLC9A1	0.495431105013342
772	PLEKHM2	0.494882003005901
773	CEP85	0.494663839235694
774	GLOD4	0.494651094263908
775	HMCN2	0.494292655242003
776	DNAH17	0.494184064203095
777	IFI27	0.494139435075099
778	NUDT12	0.493982762872909
779	SDR39U1	0.493957430346932
780	CHD7	0.492609550846793
781	DCAKD	0.49176865039388
782	HPGD	0.491480512787222
783	CACNA1H	0.491451614602763
784	CARS2	0.491058017607201
785	KIF13A	0.49069655051161
786	TPRA1	0.490505733696748
787	MUS81	0.490471543349799
788	DHX16	0.490307332332324
789	FBXO8	0.490298656266871
790	TOPORS	0.489935266471579
791	OSR2	0.489906228476258
792	HMGXB4	0.489716722894775
793	ZBTB45	0.489589032675003
794	CREB3L4	0.489360374619681
795	PON3	0.489105072937955
796	TSTD2	0.488956359030769
797	FZR1	0.48886625612352
798	NBN	0.488680906471406
799	GRB14	0.488489443409434
800	SCAF4	0.488174186712398
801	SFXN4	0.48816862170558
802	METTL4	0.488039054847441
803	WIPI2	0.487940065028455
804	SLC25A35	0.487882481291749
805	DCUN1D5	0.487657354241081
806	IRF5	0.487511336000245
807	CEP192	0.487496574805653
808	FAM104A	0.487464589847471
809	CADM1	0.487222338352536
810	PPT2-EGFL8	0.486585784619395
811	GRTP1	0.486523116361898
812	AP5M1	0.486454419616373
813	SGK2	0.486390638987431
814	SLC27A4	0.486331499943798
815	NSMCE2	0.486290431344
816	DCP2	0.486273736332382
817	NUPL2	0.486183949331204
818	SARS2	0.486058991226479
819	FBXO38	0.485900210671846
820	TMEM18	0.4858195427168
821	C1orf35	0.48571286720959
822	AZI1	0.48567331532834
823	XKRX	0.485322314609614
824	ATXN7L1	0.484912921083737
825	ECSCR	0.484808111941106
826	SETD2	0.484371154319468
827	TFB1M	0.483875409574649
828	PPP4C	0.483848063269635
829	APLF	0.483755942947702
830	EMC9	0.483724077314802
831	DHRS1	0.48371193344057
832	ACAD10	0.483500759686773
833	NAT10	0.483165020472032
834	KRTCAP3	0.482777366794811
835	FGGY	0.482450121681929
836	TF	0.48235759502266
837	ACOX3	0.482315327615544
838	SLC9A3R2	0.481863171079296
839	TPP1	0.481485938682374
840	ATP5SL	0.481298567654711
841	RECQL4	0.480868576289275
842	EIF4G3	0.480465062008134
843	NUP85	0.479782972649563
844	MAGOH	0.479700269761515
845	RHBDL1	0.479338073194131
846	RAB25	0.479297409258441
847	HERC1	0.479278583429326
848	EMID1	0.479270789031401
849	TMEM55A	0.479138086388637
850	CHL1	0.478739651951195
851	TMEM132C	0.478656063272921
852	KLF16	0.478651356391512
853	MDP1	0.478644746856158
854	XPO5	0.478458976952227
855	MDGA1	0.47832016731588
856	PTPN13	0.477682738804968
857	CHD1L	0.477649601019279
858	AIM1L	0.477637916325314
859	CRNKL1	0.477118343996267
860	GNPDA1	0.477112667974628
861	SLC12A7	0.475951827162179
862	IL34	0.475483213446077
863	DEDD2	0.475293310903325
864	DMXL2	0.475280179231648
865	ORAOV1	0.475215898607057
866	LARP4B	0.475163640574235
867	TTC37	0.474874947863024
868	HMGXB3	0.474712561921406
869	NCK2	0.474682561252531
870	KDM3A	0.47456533954229
871	GGNBP2	0.474310394092291
872	RCE1	0.473457151213805
873	B3GNT2	0.473361927221348
874	UBAP2	0.473206420445277
875	OSBPL3	0.472748583541281
876	ZNF446	0.47257026142104
877	ZNF750	0.472560367192177
878	TMEM139	0.472499063201615
879	YKT6	0.47243822269365
880	ABCA7	0.472315363909654
881	ANAPC10	0.472133805024116
882	MDM1	0.471999063493922
883	BTBD3	0.471816197301602
884	NRF1	0.471433730290733
885	MTOR	0.471060451054106
886	KY	0.470942507023212
887	GDPD5	0.47084049235005
888	GTF2H4	0.470744563618229
889	ATP11A	0.47055248108258
890	FAP	0.469915959118255
891	KIAA2026	0.469902703745035
892	SF3B2	0.469828929281601
893	WNT4	0.469755729325735
894	NMNAT3	0.469659670205593
895	ZNF358	0.469490018172409
896	ACP2	0.469421042699509
897	KDM5C	0.46931696314867
898	TTYH3	0.469273311115836
899	SMG7	0.469006959681843
900	RAB34	0.468431639414883
901	GTF3C5	0.468309656811137
902	JKAMP	0.467969259575435
903	LANCL1	0.467868563131112
904	THOP1	0.467721767208404
905	GALNS	0.467315582437619
906	SPATA7	0.467286682406018
907	APBA3	0.467145211815219
908	CMYA5	0.466930891119269
909	FBN1	0.466842761339983
910	PROSC	0.466631784842655
911	SERTAD4	0.466439591264276
912	CRY2	0.466390933425241
913	PRKD2	0.465782182039461
914	ZBTB21	0.465778205444153
915	CST7	0.46575193466139
916	CAMSAP2	0.465733837462357
917	PAPD4	0.464782262796944
918	CMTM7	0.464762174747795
919	FBLN7	0.464704471194705
920	LUM	0.464347318301025
921	PDK3	0.463669209152951
922	DPYSL2	0.46343495611431
923	CAMSAP3	0.463361248867404
924	SPSB2	0.462948147141396
925	UACA	0.462907343754537
926	MYNN	0.462817998655336
927	GDPD3	0.462706851067232
928	DNAH1	0.462636730701942
929	TAOK2	0.462465889558343
930	UBR4	0.462055341320627
931	CHD4	0.462053931155329
932	PANK1	0.461685079188275
933	RBM45	0.461650460205369
934	FZD10	0.460814394587186
935	FBLN5	0.460726365212478
936	CLASP2	0.460703897110488
937	HAS1	0.460417834238701
938	BMP4	0.46038807037927
939	CYP7B1	0.460269563468115
940	DSC2	0.460020523160595
941	MAPKBP1	0.45998059750096
942	FYCO1	0.459645297136169
943	APOD	0.459511906537748
944	RNF19A	0.459418774550221
945	PUM1	0.45927223072584
946	GRK5	0.459148501038893
947	MEIS2	0.458921130631957
948	AIF1	0.458596802753208
949	SGK494	0.458331324310501
950	PHACTR3	0.458125994746796
951	FLOT2	0.457343635895881
952	WRAP53	0.457149419195541
953	CPSF4	0.45685592300164
954	CDH3	0.456854838709677
955	THYN1	0.456719378694053
956	C15orf39	0.456680078913464
957	CDC16	0.456523248104118
958	EPG5	0.45631843329425
959	PLD2	0.455920919911237
960	C9orf156	0.455861820329294
961	ENDOU	0.455613879603661
962	CCHCR1	0.455106279799158
963	NBAS	0.455002226060384
964	IGFLR1	0.454344381508784
965	FAM105B	0.454222689524562
966	BYSL	0.454085702632463
967	EPHX2	0.453930377422639
968	ARHGAP30	0.453694338460471
969	HCFC2	0.453670354414016
970	APPBP2	0.453464361024347
971	RCHY1	0.453411213293678
972	BAMBI	0.453286072942458
973	TMEM255B	0.453090976684901
974	GATA2	0.452733339238994
975	TPR	0.452572857982837
976	DRG2	0.452400594044792
977	RFC1	0.452389006073535
978	PHF7	0.45229175544143
979	EIF2B4	0.452249142699469
980	PIGO	0.452216995856789
981	DPEP1	0.451792426883453
982	TMEM109	0.451736164815755
983	STUB1	0.451595868826597
984	PLCH2	0.451582567080262
985	RAB26	0.451547643131701
986	AP3B1	0.451364513134769
987	RCN2	0.451328543249226
988	PTCH1	0.450683159954346
989	IFT43	0.450440075172889
990	ROGDI	0.449745022918951
991	SH3TC1	0.449635739352265
992	MAP2K7	0.449620970414974
993	ANGPTL2	0.449234187573224
994	LYRM9	0.449154105192762
995	AAGAB	0.44859275481815
996	CNOT3	0.448293740823078
997	HDAC8	0.447902893681587
998	ALOX15B	0.447824382595061
999	PTGFRN	0.44770253968243
1000	PCNT	0.44754664082488
1001	PVRL1	0.447506144029372
1002	PPRC1	0.447431707793868
1003	SRP54	0.447222680429572
1004	EXOC4	0.44663894922533
1005	TBC1D25	0.446563996866962
1006	USP20	0.446487928041674
1007	TSPAN4	0.446345363225589
1008	PIGT	0.4462025007882
1009	NPC2	0.444880387606442
1010	RALGAPB	0.444641124747031
1011	DOCK10	0.444508439674297
1012	AIM1	0.444365490001305
1013	DLX5	0.444308943089431
1014	C1orf54	0.444142354952793
1015	ALDH4A1	0.444112820716885
1016	FANCI	0.443128971376313
1017	AGTR1	0.44311807305056
1018	MANBA	0.442887638160802
1019	CCM2L	0.442831308817186
1020	TMEM57	0.442707718910514
1021	CAPN3	0.442679533556603
1022	LYPLAL1	0.442579848575753
1023	HTT	0.442458522722022
1024	MYEOV	0.44227498768127
1025	YIPF1	0.441091163786427
1026	CUL4A	0.440625598060689
1027	PHB2	0.440483218139763
1028	PRPF31	0.440335061663037
1029	MTG1	0.440019977695994
1030	TNFSF13	0.439877876862878
1031	CLN6	0.439830651307404
1032	BOLA1	0.439665590157297
1033	LHX6	0.439379950496141
1034	GAB2	0.439126782300616
1035	IQGAP2	0.438985250049151
1036	MOSPD3	0.438934966886661
1037	HSDL2	0.438126699310956
1038	FST	0.437818495220211
1039	IL7	0.437609982060753
1040	MAMLD1	0.437515338095447
1041	WDFY3	0.437296259762235
1042	LTBP3	0.437250422263893
1043	HMG20A	0.437165491939681
1044	EIF4G2	0.436992185653072
1045	AUTS2	0.436923890369884
1046	DTNB	0.43681428491823
1047	BNC2	0.436535618137857
1048	BCAT2	0.436140935363049
1049	PRRT2	0.435999467838741
1050	DHRS7B	0.4354335496413
1051	EPS8L2	0.435428011992902
1052	FBXO22	0.435135106782305
1053	SHISA4	0.435115101400181
1054	AZI2	0.435007361155411
1055	UBE4B	0.434956796436899
1056	NAGA	0.434811538641081
1057	PACS2	0.434134291628666
1058	DAXX	0.43406703819008
1059	DGCR2	0.434030664182725
1060	PTBP1	0.433859463517359
1061	RAPGEF4	0.433831667105551
1062	COPG2	0.433760857463008
1063	INSIG1	0.433668002448915
1064	SMPDL3A	0.433481902062449
1065	ITPA	0.433211926339239
1066	ABCB7	0.432957322134311
1067	SAC3D1	0.432841316345015
1068	NUDT7	0.432745464889808
1069	MTCH2	0.432626031961718
1070	INTS10	0.432412976937222
1071	LIMS2	0.431988578945571
1072	HTATIP2	0.431932517925826
1073	ARHGAP33	0.431852343117659
1074	SEPT9	0.431750813799831
1075	FADS3	0.431705032251051
1076	PICALM	0.431537943978186
1077	GANC	0.431525741064959
1078	PLBD1	0.43152424750552
1079	ARMC6	0.431478576704153
1080	WDR48	0.431467075848089
1081	MRPL13	0.431328911542806
1082	ANKRD23	0.431297549688016
1083	SMC6	0.43120087117348
1084	TIA1	0.431129074832859
1085	EBNA1BP2	0.430523171513545
1086	ILF3	0.430388649077045
1087	LYG2	0.430270713699754
1088	ATP1A1	0.430095856884797
1089	TUBE1	0.429791034365855
1090	PTGES2	0.429358499350052
1091	F12	0.429304329981531
1092	ITM2A	0.428965424723907
1093	C16orf45	0.42884967465832
1094	CYBA	0.428812793598366
1095	PPP6R2	0.428798339571298
1096	ME1	0.428600063318635
1097	DALRD3	0.428559413358642
1098	SEC23IP	0.428454233377297
1099	PIGN	0.428400247946296
1100	PDZD2	0.428202678004502
1101	PIAS3	0.428033919183041
1102	NSMAF	0.427970657297949
1103	ELMO2	0.427571257720307
1104	DOCK7	0.427506090734854
1105	NDEL1	0.426927565544051
1106	TMEM55B	0.426843763178909
1107	ABCF3	0.426813428228222
1108	PCYT2	0.426366662975469
1109	GALNT2	0.426288082857326
1110	SERTAD2	0.426197790429596
1111	UBAC1	0.425702254811861
1112	CCDC64B	0.425585072533485
1113	HCK	0.425476080493798
1114	EIF2AK4	0.425233021741805
1115	RSAD1	0.425188841906352
1116	CC2D1A	0.424916422654002
1117	TBP	0.424686088286558
1118	ZC2HC1C	0.424556310503307
1119	FGD6	0.424543620528465
1120	NTRK2	0.424450983360688
1121	KDM3B	0.424313593661774
1122	BLNK	0.423916996189871
1123	NUDT18	0.423842705518701
1124	CPVL	0.423744376896195
1125	ITFG1	0.423610946401719
1126	PLEKHA7	0.423594637588161
1127	DHX32	0.423549332729922
1128	RPLP2	0.423530810971531
1129	PLCG2	0.423439306777057
1130	SMARCA4	0.423351620817228
1131	AP2S1	0.422921996117757
1132	BACE2	0.42292033082959
1133	RASAL2	0.422692579028974
1134	DROSHA	0.422666393719455
1135	ITGB3BP	0.421996666125645
1136	UCHL1	0.421933879578533
1137	NFKB1	0.421765356044843
1138	TBKBP1	0.421764728848754
1139	NAA20	0.421393427898762
1140	MPND	0.42117151188641
1141	SND1	0.421088171189855
1142	PAN3	0.420683176527467
1143	STAMBP	0.420485583710526
1144	GCLC	0.420417356208702
1145	CELSR1	0.4204032084291
1146	HMG20B	0.420330565679964
1147	TJP1	0.420155720165665
1148	VAMP4	0.420028361375255
1149	ZNRD1	0.419899148894105
1150	RDH14	0.419882045714621
1151	XAB2	0.419720378155257
1152	PCYOX1L	0.41950195113542
1153	LCAT	0.419476994967218
1154	VPS8	0.41936294732944
1155	NPEPL1	0.41909808456396
1156	FGD3	0.418959865590394
1157	UBR1	0.41856305834277
1158	SUSD4	0.418546422137606
1159	EFCC1	0.418461000519178
1160	GABRE	0.418436910413473
1161	EMP3	0.418408004047598
1162	KLHL42	0.418147500402587
1163	ADTRP	0.417991530687652
1164	RRNAD1	0.417850025014968
1165	TRAPPC11	0.417804415599394
1166	CCBL1	0.417593318155742
1167	GPT2	0.417552485702342
1168	PON2	0.417364220362079
1169	SLC35A1	0.417172830523653
1170	ULK3	0.417077799655547
1171	HN1	0.417001319302378
1172	CCDC106	0.416902394101409
1173	LRRFIP2	0.416873593118657
1174	TEX261	0.416842230498836
1175	CDK9	0.416746914512054
1176	TRIQK	0.416738167427929
1177	MERTK	0.416710748397272
1178	PPP3CC	0.416667445623201
1179	WDR26	0.416580860421938
1180	ATG4B	0.416296563006332
1181	FBL	0.416140038826473
1182	IFITM10	0.416136899849933
1183	PLXNA3	0.41611714447041
1184	PRSS23	0.416035925391019
1185	BCL11B	0.415976821192053
1186	NKTR	0.415807908062004
1187	HOXC9	0.415781612713505
1188	ELN	0.415046007879032
1189	MIEF1	0.414996875982474
1190	GFM2	0.414901429949743
1191	UBN1	0.41485424270704
1192	ANO1	0.414808854680523
1193	TNIP2	0.414543212087448
1194	MORC2	0.414485442731388
1195	CHUK	0.414349997127306
1196	ID3	0.414168555794423
1197	SMARCA2	0.413998935237716
1198	SLC38A5	0.413921173033751
1199	NIPAL3	0.413786194220829
1200	ZBTB34	0.413669875428907
1201	RPP40	0.413518830629338
1202	MUC1	0.413261925415073
1203	LACTB2	0.413202317964223
1204	DIO2	0.413018702353947
1205	EGFLAM	0.412854591116706
1206	NT5DC1	0.412285058708582
1207	ADCK2	0.411703672961195
1208	PLXNA2	0.411573664996702
1209	PPP4R1L	0.411517366083276
1210	KEAP1	0.411462446912622
1211	AAAS	0.41134834075228
1212	PTPRU	0.411142054066189
1213	HDAC3	0.410968531829991
1214	KIAA0141	0.410557341298863
1215	BCL7B	0.410475130927989
1216	WNT5B	0.410439962057698
1217	CSF3	0.410265209410904
1218	PSME4	0.41025109777015
1219	PIK3IP1	0.410213962658008
1220	USP31	0.40992246971748
1221	ZZEF1	0.4097235029039
1222	MRPL19	0.409511379661793
1223	ATP2C2	0.40950090877591
1224	STAM2	0.409404926273318
1225	TTC32	0.409300414202579
1226	GRB10	0.408925924018731
1227	MTRR	0.408574057327803
1228	TTC39A	0.408376009825867
1229	ZSCAN32	0.408331073032024
1230	FAM211B	0.408193412271458
1231	CCNT2	0.407764245039432
1232	FAM13C	0.407524404649839
1233	ARNT	0.407420185677775
1234	WDR11	0.407315264100313
1235	APEX1	0.407152031500757
1236	RTKN	0.407060984573556
1237	FHOD3	0.407056595212367
1238	FBXO4	0.406970497542103
1239	IGFBP7	0.406103478506079
1240	CNPY3	0.405893617974945
1241	TMEM63A	0.405788131629594
1242	FAM180B	0.405748802332847
1243	RFX2	0.405475272469462
1244	ANP32E	0.405022051750569
1245	ASIC3	0.405005064804248
1246	PPP5C	0.404538155604258
1247	HERPUD1	0.404457636150047
1248	OVGP1	0.403753910323253
1249	PPM1J	0.403249582678818
1250	SIDT2	0.403220923896591
1251	PDE9A	0.403220368519009
1252	HOXB2	0.403183190525592
1253	SAAL1	0.403064664552131
1254	RAP1GAP2	0.403020398223449
1255	MBNL3	0.402994268305374
1256	PPP6R1	0.402975821450713
1257	MTMR4	0.402872875244905
1258	FNDC4	0.40239795629248
1259	TMEM25	0.402260522402546
1260	RFX5	0.402087682672234
1261	SYT8	0.402085289130528
1262	HSPA4	0.402061518332095
1263	ZNF862	0.40202617167065
1264	C11orf68	0.401823532388386
1265	EPHA4	0.401808228853964
1266	RNF214	0.401686470141679
1267	NAA30	0.401636147355765
1268	ATP13A2	0.401534978663458
1269	CBFA2T3	0.40130655693265
1270	CDKN2B	0.401253242674483
1271	CEP350	0.401089494010243
1272	NHSL1	0.400983191607309
1273	DTX1	0.40086063498631
1274	SNRNP70	0.400834757001702
1275	TAF6L	0.40030203426271
1276	DENND4A	0.40023365973813
1277	DOK4	0.400178480252473
1278	LRRC61	0.400168056064289
1279	ENKD1	0.400163962211759
1280	FBXL5	0.400099393052091
1281	PJA1	0.399871730383706
1282	POLR3H	0.399650305779322
1283	ZUFSP	0.399569675160425
1284	MAP2K3	0.399550303384117
1285	BRPF3	0.399107835636598
1286	MCRS1	0.399012162197636
1287	PRMT6	0.398934897448653
1288	TRAPPC1	0.398900808736296
1289	EPS15	0.398676558419706
1290	PARD3	0.398647901191613
1291	TNFAIP2	0.398235635927694
1292	PLK2	0.398008609244881
1293	ACAD9	0.397913633163115
1294	POMT1	0.3976859874022
1295	DHRS13	0.39758029353995
1296	PLAU	0.397536488984885
1297	NTM	0.397472536940507
1298	MYO18A	0.397202540715596
1299	LEMD2	0.397076138083342
1300	SPG11	0.396985448546144
1301	PML	0.396833984220123
1302	KLHL18	0.396821203451731
1303	OCRL	0.396810056884222
1304	RP11-195F19.5	0.396743474798245
1305	PLA2G16	0.396652927895383
1306	TNS1	0.396648576671325
1307	ABTB1	0.396541660039819
1308	CDC37L1	0.396385145722576
1309	TBCE	0.396361227833211
1310	CD69	0.396351595227326
1311	WAPAL	0.396294902227405
1312	UXS1	0.39594913527704
1313	LGR5	0.395845739019452
1314	AIMP1	0.395480021762695
1315	NGFRAP1	0.395026340083819
1316	GCFC2	0.394808625056566
1317	SEMA4B	0.394680163197361
1318	TP53BP1	0.394467531962754
1319	GPR146	0.394332088408315
1320	TBC1D13	0.394202642780631
1321	COPS7A	0.394082628096458
1322	HSD17B4	0.393664383469138
1323	SFMBT1	0.39346487919781
1324	PARP10	0.393453647525971
1325	TTC8	0.393320608904849
1326	PHF8	0.393067465188658
1327	UPF1	0.393022736925214
1328	DDR1	0.3929497632704
1329	ZNF385D	0.39289461973277
1330	SIPA1L1	0.392833948609365
1331	PHKB	0.392635291191531
1332	ORMDL3	0.392192393134332
1333	FLYWCH2	0.391933971758906
1334	KDM5A	0.391914533467616
1335	CTBS	0.391909316491676
1336	ALAS1	0.39188294974668
1337	TTC7B	0.391719457134021
1338	WDYHV1	0.391487824787536
1339	TPRG1	0.391417305784186
1340	MSRA	0.391340899537621
1341	TEAD3	0.39133536357009
1342	AHSA1	0.391212402237544
1343	MTM1	0.391201397296021
1344	OXSM	0.391173906999199
1345	LPAR2	0.391052538426979
1346	OLFML2B	0.391012397678721
1347	INSIG2	0.390657903540306
1348	SCAP	0.390461864358357
1349	PTPN18	0.390241801949855
1350	GAS2L1	0.390037142456258
1351	FGFR1	0.389947486076579
1352	SLC45A4	0.38954699684505
1353	ARL4C	0.389443087459576
1354	C17orf70	0.389262224820165
1355	MTMR2	0.389223823995266
1356	FHIT	0.389077435682317
1357	SLC44A3	0.388997901974002
1358	NGLY1	0.38870792536448
1359	TET2	0.388697656670303
1360	ERCC6L2	0.388392489257755
1361	SLC35F5	0.388088810743227
1362	NUP160	0.387881885530175
1363	TACC3	0.387801738078764
1364	TELO2	0.387782326764397
1365	C6orf106	0.387686479031383
1366	LIN7B	0.387470902114378
1367	ZFYVE28	0.387106137850022
1368	REV3L	0.387045021558207
1369	ESRP1	0.387035634327551
1370	ACACA	0.387035337495316
1371	RDH11	0.386194433363293
1372	BTBD2	0.385919181689384
1373	MCTP1	0.385801162265316
1374	SLCO2B1	0.385788676991387
1375	CYP2R1	0.385769849638064
1376	USP24	0.385371188749834
1377	NUP133	0.384964345981058
1378	TMEM51	0.384861895123467
1379	STOML1	0.384854822005819
1380	TFIP11	0.384567451909243
1381	POLR2I	0.384495282015057
1382	SATB1	0.384479623489143
1383	FAM114A2	0.384414902593141
1384	MANEAL	0.384209415241714
1385	SNCG	0.384115505035768
1386	DGCR8	0.384000384398964
1387	PRUNE2	0.383853419737122
1388	YTHDC2	0.383697386910805
1389	MACROD1	0.383690584725419
1390	PRSS22	0.383538206114203
1391	PLAA	0.383509179929716
1392	CTPS1	0.382976508060712
1393	PDGFRA	0.382755493835905
1394	AMICA1	0.382719409558618
1395	KIF20A	0.382631725676052
1396	GIT2	0.382608014266304
1397	PXMP2	0.382439830235213
1398	MLH1	0.382349392121192
1399	CHCHD7	0.382069373818936
1400	HCCS	0.381872405933232
1401	ACLY	0.381842566218126
1402	EFEMP2	0.381031134147553
1403	EDN2	0.380791199492278
1404	FTSJ1	0.380546733336209
1405	HSPA12B	0.380432529582577
1406	C1orf159	0.380308111842677
1407	DNPEP	0.380283065298697
1408	AJUBA	0.380069943589406
1409	LPHN1	0.379989630638624
1410	ZBED5	0.379851743462245
1411	SHC2	0.379833424153347
1412	EMC8	0.379823030038264
1413	NAGPA	0.379815938882595
1414	DYM	0.379809878002478
1415	FGFRL1	0.379762912785775
1416	DENND2D	0.379696687062712
1417	ZDHHC18	0.379625821784917
1418	CDH24	0.379583100203902
1419	TCF12	0.379304883944644
1420	SCAF8	0.379303166824742
1421	SLC35B3	0.378984442355716
1422	ARSA	0.378947914403081
1423	TRA2B	0.378872468507419
1424	CNTRL	0.378862063143677
1425	SETD9	0.378857021129294
1426	POLD1	0.37883234659919
1427	RIOK1	0.378555379513192
1428	POLR2B	0.378507524807133
1429	UNKL	0.378466790136616
1430	LIN37	0.378425386820059
1431	CHIC2	0.378398868673349
1432	SP110	0.37833582424126
1433	PASK	0.378095183492934
1434	MTSS1	0.378079658936241
1435	PPP2R3C	0.377767454570296
1436	PRKCB	0.376489589405412
1437	TEX2	0.376087879767496
1438	AMN	0.376045521230326
1439	SNRNP40	0.376039636281795
1440	NUDCD3	0.376007873771184
1441	TP53I11	0.375936563868634
1442	LOXL1	0.375762633855522
1443	FAM19A5	0.37560641908839
1444	PLA2G2A	0.375583837658544
1445	DHX37	0.375524351610178
1446	B3GNTL1	0.375132178410207
1447	ITM2B	0.375025085228483
1448	PCSK2	0.374910106874868
1449	AP1M2	0.374885267016736
1450	MAP2K5	0.374828951046893
1451	NCS1	0.374519338896431
1452	VWA9	0.374497100103889
1453	TAGLN	0.374340091895145
1454	DZIP1L	0.374257711525077
1455	TMEM132A	0.374246602921814
1456	TMEM110	0.37400914397263
1457	AGR2	0.373921489001146
1458	TRIM39	0.373768326954791
1459	FAT1	0.373518517996654
1460	TNRC6A	0.373460361561922
1461	ILK	0.373340172038558
1462	LTB	0.373317470079955
1463	MICAL2	0.373310156382006
1464	RGL3	0.37302566551718
1465	B4GALNT3	0.372861794853732
1466	GLTSCR1	0.372810984000467
1467	MFSD1	0.372714545092443
1468	ING1	0.372674228752667
1469	PDIA5	0.372621736157899
1470	ZMYND8	0.372608997534035
1471	C3orf38	0.372597404331442
1472	DOLPP1	0.372489472960379
1473	FASTK	0.372365891056997
1474	TMEM176A	0.372347626222093
1475	POLB	0.372098276370355
1476	NSMF	0.371968335668701
1477	ATG16L1	0.371920272077382
1478	IBTK	0.371920183350677
1479	C15orf41	0.371875
1480	TNNT2	0.371662743829021
1481	LRP5	0.371612940804221
1482	FBXO5	0.371455747122116
1483	RBM47	0.371220344239417
1484	SEMA6C	0.370512834173317
1485	PITPNM2	0.37050526189584
1486	NAPEPLD	0.370063185252049
1487	LHX2	0.36975505857295
1488	GLB1	0.369608111885718
1489	IL1RL1	0.369607066664807
1490	C16orf13	0.369255025936341
1491	GOLGB1	0.368968788280835
1492	BAZ1A	0.368779245633667
1493	KIFAP3	0.368674857131533
1494	PCM1	0.368648648648649
1495	EPCAM	0.368451347400161
1496	ERMP1	0.368122661742214
1497	TC2N	0.368065832885921
1498	KIAA0196	0.368035962936033
1499	NCOA3	0.367967405024489
1500	P4HA2	0.36767405071521
1501	WWC2	0.36759941089838
1502	ZFYVE19	0.367528004621058
1503	REXO2	0.367105252086261
1504	UBXN4	0.366549192834936
1505	RNF34	0.366189650343708
1506	BCAP29	0.365834801455025
1507	ZNF514	0.365801496796953
1508	CD58	0.365788448916183
1509	NDC1	0.364560150460731
1510	C16orf52	0.36448391357359
1511	DEDD	0.364247046973808
1512	ATF2	0.363881171008542
1513	FAM76B	0.363744144869991
1514	OPLAH	0.363429574524356
1515	GORASP2	0.363023041660568
1516	PRRT1	0.36297407394522
1517	RPS6KB2	0.362825945624965
1518	LMAN2	0.362819598952538
1519	RQCD1	0.362543424449597
1520	FANCL	0.362235278318529
1521	SIPA1L3	0.362228082049301
1522	ATP2A3	0.362126315746673
1523	NPR2	0.362077028364487
1524	MAOA	0.361464270641285
1525	KIAA1407	0.361004835356413
1526	STARD9	0.360959578935046
1527	ZDHHC5	0.360831052404258
1528	MIPEP	0.360754125377639
1529	EIF2AK3	0.360718263108176
1530	TBC1D23	0.360596738160991
1531	HDDC2	0.360576191128259
1532	TRPS1	0.360431252468944
1533	AQP1	0.360395856868778
1534	CCDC107	0.360308141735757
1535	SH3GLB2	0.359993082480447
1536	WDSUB1	0.359910778520701
1537	ANGPTL1	0.359832591234278
1538	WLS	0.359828471745213
1539	EFTUD2	0.359727101567158
1540	TARBP1	0.359635027083658
1541	MYO9B	0.359327487757249
1542	PRRG1	0.358885810643541
1543	ABCC3	0.358811484957386
1544	C14orf80	0.358494132728975
1545	BZW2	0.358481575390364
1546	BMF	0.357871376796389
1547	FAM110A	0.357757416072981
1548	RNF123	0.35745340688036
1549	CTTN	0.357452594879417
1550	DCUN1D4	0.357254759034213
1551	LRIG3	0.357240866976484
1552	ANGEL1	0.356969070525562
1553	PYROXD2	0.35696566449734
1554	TAF4	0.356962716507559
1555	CRBN	0.356875585702226
1556	VEGFA	0.356861354647527
1557	OPA1	0.35677836023425
1558	VPS13A	0.356769553099147
1559	PEPD	0.356738929130639
1560	DDX24	0.356666576752487
1561	TECPR2	0.356339193588074
1562	SPATA5L1	0.356259037587839
1563	KRR1	0.356194716740857
1564	STRIP1	0.355947857927971
1565	ELAC2	0.355878159704984
1566	HDDC3	0.355318805415021
1567	MTF2	0.355297817518827
1568	ZC3H4	0.354782775763107
1569	SLC9A8	0.354759008755193
1570	CADPS2	0.354579523511562
1571	INTS9	0.354569057284349
1572	ARMC7	0.354522769694568
1573	CAD	0.354493542650398
1574	MOGS	0.354448282605207
1575	ATG13	0.354319402758084
1576	PTPRF	0.353957755736689
1577	CCM2	0.353894392875814
1578	CCDC88C	0.353863433977888
1579	SERPINE2	0.353732577322246
1580	GREM1	0.353731358422054
1581	ENTHD2	0.3536377022496
1582	HOXA9	0.353480961647161
1583	TMEM243	0.353462428275343
1584	STAT6	0.35332621894984
1585	MAGI1	0.353138688661795
1586	PLEKHG1	0.352910629800847
1587	CHD1	0.352660362872786
1588	SMOC2	0.352512316358867
1589	AVL9	0.352290199793745
1590	CREB3L1	0.35217798808354
1591	BACE1	0.351986434122376
1592	HEATR1	0.351909324617254
1593	MNAT1	0.351851851851852
1594	NUP205	0.351668289840522
1595	WAC	0.351565771636717
1596	SMAP2	0.351201823404497
1597	PNLDC1	0.351141749246015
1598	UBR3	0.35099237945447
1599	RRP12	0.350974554384506
1600	ZNF292	0.350742809999268
1601	MFSD8	0.35066845104589
1602	OLFML3	0.350547324167181
1603	RGS11	0.350508046616756
1604	DLG5	0.350464026921042
1605	C6orf136	0.350388757964424
1606	ARMCX3	0.350292984021562
1607	ZNF202	0.350225255759383
1608	SLC22A5	0.349908079974106
1609	MUM1	0.349901512770299
1610	DENND5A	0.349752771527565
1611	SLC7A4	0.349686028257457
1612	PODN	0.349473047339193
1613	LZTR1	0.349416610676753
1614	GNPAT	0.349308309016958
1615	IQCE	0.349167107630437
1616	DENND4C	0.348652858857924
1617	ZMYND11	0.348553382382194
1618	PHF2	0.348548417167855
1619	IL17RC	0.348463083353823
1620	ICA1	0.348286299114688
1621	GYG2	0.347961344223508
1622	TSPAN5	0.346909601284859
1623	CNRIP1	0.3468035459506
1624	SFRP1	0.346555040165496
1625	HLTF	0.346328488328152
1626	TFRC	0.346324917301486
1627	PSMA4	0.346307612081991
1628	SSFA2	0.346282177809485
1629	CENPJ	0.346248079607186
1630	UBE2J2	0.346221083405108
1631	KLHL36	0.345992631088903
1632	STX6	0.345898277237824
1633	RARS	0.34578934713672
1634	MED31	0.345658545899423
1635	NR3C2	0.34549478725076
1636	GTF3C3	0.345486270948609
1637	LMO4	0.345438824038046
1638	TTC12	0.345220510256643
1639	PTTG1	0.34509817246932
1640	CYP4X1	0.345059437883294
1641	MTMR11	0.345034773023523
1642	PIK3CB	0.344968723109231
1643	AURKAIP1	0.344825354020996
1644	SLC7A6	0.344657585398653
1645	ACP5	0.344575777640597
1646	MYBBP1A	0.344564987314607
1647	MED25	0.344127041116473
1648	FAM50B	0.343895299828149
1649	PKN2	0.343872685172682
1650	TM9SF4	0.343669634974859
1651	RAB11FIP5	0.343336743458724
1652	TRPV2	0.34322416912819
1653	CPNE8	0.342949238512714
1654	HCFC1	0.342945389517814
1655	SART3	0.342676664739748
1656	GABPB1	0.342658002950958
1657	LDOC1	0.3425965406648
1658	LZIC	0.342555919824393
1659	MLLT3	0.342441163203596
1660	TEAD1	0.341848470987179
1661	MT1F	0.341508627059846
1662	ATF1	0.341379552369866
1663	KANSL1	0.341364656594881
1664	DGAT2	0.34134341226101
1665	MLF1	0.341223075324997
1666	MINK1	0.340973857329684
1667	PREPL	0.34095281702835
1668	MMS19	0.340828710271832
1669	RAB11FIP3	0.340685340467038
1670	DNAJA2	0.340500639821294
1671	KIAA0100	0.34043474087354
1672	MRPL22	0.340298734190542
1673	NPAT	0.339681619943795
1674	SPARCL1	0.339620535513028
1675	GNAI1	0.339547065167154
1676	CLIP2	0.339146520783595
1677	YBX2	0.339087904234411
1678	PDE8A	0.338825419713393
1679	RANBP10	0.338443788529314
1680	NFKB2	0.338069350025983
1681	VRK2	0.33780159367535
1682	ID1	0.337351191324133
1683	NUDT16L1	0.337231793012056
1684	PRPF8	0.337047873195512
1685	RELL1	0.336879207310492
1686	MSMB	0.336810082572794
1687	PNKP	0.336522264169355
1688	EVA1B	0.336484733132081
1689	ST6GALNAC6	0.336425557427051
1690	LRRC23	0.336418250543535
1691	USP15	0.336257718603552
1692	NFKBIL1	0.336142493231743
1693	KLK11	0.335916082502466
1694	POPDC2	0.335108864859349
1695	TMCC3	0.335053540922231
1696	CORO1B	0.334672310952155
1697	CMTM3	0.334543938760046
1698	NAF1	0.334517355495853
1699	APBB1	0.33450456055635
1700	TRABD	0.334403357575868
1701	TMEM88	0.334337043445889
1702	THOC6	0.33402301813913
1703	FAM160A1	0.333551055954714
1704	GPATCH2L	0.333391963112701
1705	FAM57A	0.333383874267229
1706	MITD1	0.333280795080479
1707	CEP120	0.333215246962051
1708	POLA1	0.333103078713422
1709	UBXN11	0.333086801778014
1710	DHX8	0.333042986323758
1711	SULF1	0.332677344068498
1712	SNX24	0.332546274244199
1713	SYNE1	0.33240174286114
1714	MAP4K3	0.332147097486103
1715	UBALD1	0.331895820714718
1716	PCCB	0.33129049404531
1717	BBS1	0.330800446863144
1718	ARID4B	0.330712357021512
1719	TMCO3	0.330469978821219
1720	TCEB3	0.330393097417948
1721	TNK2	0.330327304044034
1722	SEPHS2	0.330228213507721
1723	POLG2	0.330131534534684
1724	PREB	0.330037823371436
1725	XRCC4	0.329690111397672
1726	TSTA3	0.32962059220202
1727	PHRF1	0.329536348034416
1728	SYNE2	0.329471889647888
1729	DMAP1	0.329339037871219
1730	CTHRC1	0.329281383509763
1731	ARHGEF1	0.328976900548786
1732	ARFGAP1	0.328883245246757
1733	DXO	0.328817757952498
1734	SGCE	0.328518047729869
1735	COBL	0.328262039309529
1736	SLC18A2	0.328224747740487
1737	LITAF	0.328219554929739
1738	ANO8	0.328218011155005
1739	PAMR1	0.328032968961515
1740	FBXO42	0.327943243193299
1741	TRIM27	0.32777649066259
1742	CYB561D2	0.327697288811852
1743	C1orf131	0.327643569488383
1744	TMX3	0.327632342288354
1745	RALB	0.327607773851769
1746	FAM73B	0.327436151389587
1747	ANKIB1	0.32736013986014
1748	BCKDHA	0.32707835107167
1749	TAMM41	0.326906234894257
1750	KCTD13	0.32668872260104
1751	TBX1	0.326628771316135
1752	TMEM164	0.326593810126569
1753	DDX31	0.326541493950758
1754	EED	0.326435376795089
1755	DLX4	0.326262847146293
1756	SPTBN2	0.326043328892334
1757	FAM84A	0.326009220738596
1758	SACM1L	0.325985209682708
1759	ADM	0.325958012860367
1760	NOD1	0.325898617511521
1761	CDC42BPB	0.325876047366553
1762	G6PD	0.325826159886513
1763	SPIN4	0.325595076455093
1764	CAT	0.325556902865524
1765	C21orf59	0.325480449349272
1766	SMARCAL1	0.325385085679395
1767	SERTAD3	0.325289693641275
1768	NAA25	0.325287289730354
1769	ZNF276	0.325137315357681
1770	RORA	0.325102571305356
1771	HN1L	0.324828610006958
1772	DDIT3	0.32475165919087
1773	KLC4	0.324707291203085
1774	KANSL1L	0.324702640375051
1775	NCKAP5L	0.324659128673941
1776	CD36	0.324585008745705
1777	RUFY1	0.324524654834763
1778	FAM65A	0.32445997133636
1779	POLR2H	0.324433049211266
1780	HERC3	0.324262634077177
1781	TMEM214	0.324215974048568
1782	ABCG1	0.323640915748626
1783	BRD8	0.323539636224131
1784	ENTPD5	0.323482435637021
1785	SH3BP5L	0.32345416314069
1786	CDK13	0.323437621854247
1787	ATXN7L2	0.323326322412718
1788	MGP	0.323245204279841
1789	DDX26B	0.323105019468521
1790	ST3GAL4	0.322794626708671
1791	DDX41	0.322530956279309
1792	DLG3	0.32227728709
1793	NT5C	0.322065261793957
1794	DLAT	0.321608341997891
1795	C1orf122	0.321600864728606
1796	ZNF414	0.321466271706651
1797	WDR53	0.321444128401027
1798	MCU	0.321185919293021
1799	MAMDC4	0.321149108518511
1800	SHKBP1	0.321097522912074
1801	MCM3AP	0.321024652998688
1802	UBE2E2	0.320912168598772
1803	CFP	0.320811345188678
1804	CDH11	0.320482118978855
1805	DFNB31	0.320398719558811
1806	ZNF691	0.320368908418552
1807	SREBF2	0.320250020528283
1808	RAPGEFL1	0.320151443545921
1809	MAP3K1	0.320132524606302
1810	RGS1	0.320100277348151
1811	TRADD	0.32009927833129
1812	FAN1	0.320058275907669
1813	OARD1	0.320042439277802
1814	CTU2	0.319908449338074
1815	NSL1	0.319407101820412
1816	ZNF579	0.31929299639223
1817	C18orf21	0.319239740321637
1818	IFIT5	0.319169226282931
1819	SLC4A11	0.319145560567573
1820	TMEM5	0.319016766391434
1821	FBXL6	0.318682283396537
1822	TLE4	0.31847984458475
1823	AIF1L	0.318467131851923
1824	CMTM4	0.318243088412569
1825	RAP2C	0.318080040550554
1826	PPP2R3A	0.317832455428394
1827	TMEM79	0.317765651277649
1828	ELMSAN1	0.317486638805167
1829	WASF3	0.317459811357925
1830	MAN1B1	0.317087875154426
1831	DNAJB2	0.316726253651056
1832	TBC1D10B	0.316561625086418
1833	USP38	0.316484303649389
1834	SCN4B	0.315691537299891
1835	ARRB1	0.315681763714602
1836	GAREM	0.315645713531189
1837	BBS7	0.315284533088808
1838	C11orf24	0.314871627482032
1839	VPS9D1	0.314551338837263
1840	UBN2	0.314483201604286
1841	DIDO1	0.314216589486433
1842	LRRC16A	0.314207096683619
1843	IFT140	0.314116415463439
1844	ACAA1	0.314066825369263
1845	TRIP10	0.31404229676758
1846	ZNF142	0.313669979518768
1847	ALPL	0.313628965550268
1848	CREB1	0.313497694336145
1849	POLG	0.313219953355005
1850	PDZD4	0.312713371171065
1851	CTDP1	0.312669903561555
1852	SPHK1	0.312477775681864
1853	ABHD3	0.312268077732606
1854	ARHGEF16	0.311935630894426
1855	MCF2L	0.311865425968732
1856	ALDOA	0.311832886568468
1857	PPFIA1	0.311726446686769
1858	PSMD6	0.31163051608532
1859	FAM129B	0.311346444252813
1860	SCARA5	0.311227893582646
1861	FNDC3A	0.310922069319726
1862	DKK3	0.31075892169086
1863	SDC3	0.310748179209888
1864	USP45	0.310679691757582
1865	EMD	0.31049795331718
1866	OLFM1	0.310355539961892
1867	PLD1	0.310286548868976
1868	CYP26B1	0.310063283697767
1869	GALK1	0.309564259749403
1870	HIST1H2AC	0.309541028764056
1871	RBMS3	0.309403479170358
1872	DLG4	0.309312049978965
1873	TACC2	0.309133496449431
1874	VARS2	0.309125536769858
1875	UTRN	0.308906144276671
1876	AMMECR1	0.308882015024304
1877	PTPN3	0.308688812050702
1878	ARHGEF2	0.308585257740797
1879	NUDT6	0.308134689018425
1880	ZMAT1	0.30802268113639
1881	SNED1	0.307945439344643
1882	PDE5A	0.307852711323722
1883	RIT1	0.307812706273222
1884	SULF2	0.307801096986474
1885	TMEM248	0.30768608193186
1886	OSBPL5	0.307658713238717
1887	MRPL1	0.307362169575512
1888	FUK	0.307236689840246
1889	RAP1GDS1	0.307236127934908
1890	PPP1R12A	0.307220594953676
1891	PIGQ	0.307079772748266
1892	MAEA	0.306842572459787
1893	TAPBPL	0.306422272074593
1894	TCF25	0.306342639527608
1895	EEPD1	0.306340375745558
1896	HUWE1	0.306317060741883
1897	DDX42	0.3060864725692
1898	NPM3	0.306011982655434
1899	EPHA1	0.305980338641427
1900	HSD17B14	0.305941366042244
1901	PIH1D1	0.305826283431671
1902	DGKD	0.305705433345191
1903	CORO7	0.305643455123702
1904	CDCA8	0.305580613824195
1905	CCNH	0.305425123240745
1906	KDM2A	0.305407264392
1907	GZF1	0.305302697815793
1908	ZNF428	0.30518047252677
1909	GRAMD4	0.305093230379224
1910	DEGS2	0.304916429942504
1911	SLC22A23	0.30449095193151
1912	CEP57	0.304466892761929
1913	XXYLT1	0.304120691922392
1914	KIFC3	0.30388283638863
1915	MED12	0.303715221936776
1916	TIMMDC1	0.303622395648953
1917	ITGB2	0.303427451500524
1918	CDCA3	0.303394392494414
1919	DOCK6	0.303367921469117
1920	HIF1A	0.303331438161353
1921	ARAP3	0.30330883974489
1922	KHNYN	0.303296753048433
1923	NNAT	0.303198752626857
1924	VEGFB	0.303085526591214
1925	ACSS2	0.303077800375172
1926	LMBRD1	0.302860356584647
1927	ACADM	0.302790433186201
1928	FAM49A	0.302497239281632
1929	SYNGAP1	0.302477249515679
1930	PQBP1	0.302428869126054
1931	SEC13	0.301936415648029
1932	ATXN1	0.301807836063175
1933	PHYHIP	0.301708327038115
1934	HID1	0.301422636576102
1935	ALOX12	0.301351931594389
1936	SLTM	0.301295538097932
1937	CGN	0.301165450763332
1938	ECI2	0.301137420803391
1939	ZHX3	0.301028285716207
1940	CAMTA2	0.300850667592563
1941	C18orf8	0.300603751448394
1942	MYL3	0.300280406046442
1943	ZCCHC6	0.300231241009663
1944	XPO1	0.30016741384758
1945	HOXB3	0.299755976959044
1946	TRIM29	0.299632910679474
1947	ACD	0.299616950756152
1948	FAM173A	0.299294604003838
1949	LRRC14	0.298913333289979
1950	ADAM15	0.298883338130375
1951	SHFM1	0.298828384174578
1952	MAPK8	0.298825787737024
1953	DTNBP1	0.298711962727542
1954	CRY1	0.298679040581583
1955	ANKH	0.298464931196495
1956	PGLYRP4	0.298354824366385
1957	POLR3F	0.298333042310873
1958	NT5E	0.298242119594509
1959	CYSTM1	0.298022907414625
1960	AREL1	0.297979307089565
1961	RHOBTB1	0.297849319712316
1962	OXLD1	0.297815189633973
1963	ATAT1	0.297639981490051
1964	EDEM2	0.297526246707681
1965	LMAN2L	0.297424528108017
1966	TESK2	0.297325067549906
1967	CHI3L2	0.297289449211515
1968	HEATR2	0.297273585987696
1969	PPP2R1A	0.297273520788214
1970	GOLT1B	0.296999175315123
1971	FAM150B	0.296551173497477
1972	SPATA13	0.296297211692914
1973	ROBO4	0.296209442431934
1974	HEBP2	0.296112604254295
1975	ABHD16A	0.296101315250455
1976	TGS1	0.296081923419412
1977	SLC39A3	0.295966210793612
1978	METTL3	0.295782111459185
1979	ASCC3	0.295764648366843
1980	CNST	0.295682158479757
1981	SENP3	0.295526515217507
1982	KRT27	0.29532293986637
1983	MCOLN1	0.295165843684978
1984	CDIP1	0.295001985590288
1985	ARAP1	0.294944108887546
1986	RPS6KA4	0.29493665880745
1987	CYB5R2	0.294762305303538
1988	LRBA	0.294712176193819
1989	EIF2S1	0.294636600667135
1990	ELMOD2	0.294428793468118
1991	SLC39A7	0.294420451325032
1992	HIVEP3	0.29431242095728
1993	BRAP	0.294136847592792
1994	C3orf58	0.293975109981885
1995	FAM20A	0.293693591999877
1996	GPATCH1	0.293629889723647
1997	NUP188	0.293509802382822
1998	AC139100.2	0.293422519509476
1999	MAPKAP1	0.293377036265931
[truncated: 4,649 more rows]

## Sheet: Group1 (IR-IR)
rank	hub	r
1	DSG1	0.975201257151362
2	EDF1	0.97065820777161
3	GDPD2	0.938675388389207
4	BGN	0.930807248764415
5	GCSAM	0.92064912075521
6	ZNF750	0.908207345219983
7	NKPD1	0.899467054263566
8	NOTCH3	0.893705101668087
9	HMBOX1	0.888771730205016
10	SGMS1	0.88282306651912
11	TREX2	0.875810669895428
12	SLC1A6	0.866658351004116
13	EFHC2	0.855236485451216
14	KCNK7	0.853294764310913
15	ECI1	0.852824484348205
16	CDHR1	0.847609976419495
17	EIF1B	0.845639717235169
18	PAK6	0.838584406721157
19	RNF43	0.838176744529576
20	TP53AIP1	0.830931549150798
21	ZBTB11	0.830630630630631
22	WNT16	0.828217694093371
23	LAMC3	0.82652440868747
24	KIAA0895	0.824094888034131
25	NRG2	0.822622968132666
26	POLR2G	0.818552029752173
27	FAM132A	0.813694826670242
28	SMIM13	0.813337866060436
29	SLC22A15	0.813030934520875
30	PMEL	0.811199790658119
31	SERPINB7	0.808880373657644
32	ZFYVE26	0.806515171417313
33	PPP1CC	0.804630969609262
34	TP73	0.799016138294243
35	WNT4	0.795799720403041
36	GJB3	0.795062102009602
37	SPTSSB	0.793337402123251
38	KCNN4	0.790048371919775
39	ALG3	0.789852378144022
40	SUPT20H	0.788089671149357
41	KPRP	0.787543883756307
42	ENGASE	0.787540005364367
43	ZNF711	0.785863444126982
44	KLHL42	0.783882269974975
45	SOX15	0.78058019370723
46	MED13L	0.779063871241613
47	COL9A3	0.778446126072742
48	MAF	0.775390782347961
49	ESYT3	0.774135248690575
50	CENPP	0.773556367830053
51	GLT8D1	0.768999940729017
52	C19orf43	0.766385484200361
53	CYP4F22	0.762403229428364
54	WFDC3	0.759606538238597
55	LMO4	0.754129635083315
56	VSNL1	0.75312199807877
57	IRX5	0.750475289042481
58	FERMT1	0.749564883469505
59	C11orf49	0.748005649970303
60	IL17RE	0.746460561894796
61	ATP6V0A4	0.745720596355605
62	QPCT	0.741774170679736
63	SHROOM2	0.741149755349931
64	TMEM131	0.740142811571221
65	BTG3	0.738446202858585
66	EMP1	0.735103736147533
67	BAI1	0.734787369456485
68	GRHL3	0.733409963120704
69	MAL2	0.730260648465583
70	EFNA4	0.729692385827242
71	RNF39	0.728575302404384
72	LMO1	0.726380712082983
73	EZH2	0.725806603524234
74	DPEP1	0.725129788129648
75	PDE4B	0.724114905277387
76	WNT10A	0.722261285332583
77	NRSN2	0.721280741007603
78	EPN3	0.720070183227591
79	DNAH17	0.71804285124386
80	BCL11A	0.716716526464736
81	DLG2	0.715397133889527
82	C2CD5	0.714465587344809
83	SRPR	0.713850691530861
84	MUC15	0.713819971253965
85	PACSIN2	0.712294242884085
86	SMPDL3A	0.711649999278962
87	PRSS53	0.710703124099331
88	CAPN12	0.709190585708701
89	MNT	0.708971461318927
90	EGFR	0.708562300575058
91	DEGS2	0.708517678176179
92	PAQR6	0.707715412897411
93	SERPINB8	0.703124826707601
94	RNF44	0.702027319638603
95	RAPGEFL1	0.69980397780845
96	C19orf26	0.699596607376411
97	CRISP3	0.699067774874298
98	IGFL2	0.698022959183674
99	CTTNBP2NL	0.696490480442015
100	BTBD11	0.69610610317632
101	ETV3	0.695258711835826
102	PARP16	0.695071267532542
103	VAV3	0.694742200148258
104	GLS2	0.6936859872874
105	CWH43	0.693320974045937
106	SLC20A1	0.692065586065595
107	TCF7L2	0.691224899636946
108	PGAP1	0.691208356164743
109	KRT23	0.6884396478717
110	ETV4	0.685690233820965
111	LRRC1	0.68507557636263
112	NME3	0.683717067731151
113	CYB5R1	0.682896458735537
114	USP21	0.682852807283763
115	LYPD6B	0.682806610611772
116	PASK	0.68236802789092
117	NSMAF	0.681484060465179
118	PSMB8	0.678345763825517
119	PHACTR3	0.677807598225704
120	FARP1	0.677756946828669
121	ATP10D	0.677483251155185
122	HOXA9	0.677267046151742
123	FZD10	0.676452020285168
124	COL17A1	0.674606043880785
125	GRTP1	0.670274582343009
126	PLA2G4F	0.669941625688927
127	MAPRE3	0.669304161383557
128	MDFI	0.668819523423384
129	EGR2	0.668815198545271
130	HTT	0.668770189024467
131	KREMEN2	0.66735112936345
132	KRT73	0.665981500513875
133	C15orf61	0.665088627197161
134	MIB2	0.66445061716449
135	CTSV	0.663986231501319
136	RP11-295P9.3	0.663228125519334
137	DEF6	0.663090629590517
138	TIAM1	0.661681103782606
139	OVOL2	0.661459994504086
140	EPHX3	0.661422814271527
141	STAMBP	0.660739845092601
142	DDX31	0.660066040815528
143	TYRP1	0.659877322465284
144	PPARGC1A	0.659322028752863
145	CHAF1A	0.659086103011476
146	FGF11	0.658388225497328
147	ELN	0.658292622086675
148	BRAT1	0.657702977980451
149	DVL2	0.657506545939449
150	TPPP3	0.657395264147884
151	MX1	0.656834453660838
152	KRIT1	0.655895483646317
153	CORO1C	0.655615370742398
154	HADH	0.654880326427533
155	FGFR3	0.654863110886305
156	HDAC6	0.654752861392735
157	MFSD2A	0.654522891865068
158	CHD2	0.654137128293445
159	IGSF10	0.652431279908436
160	C16orf80	0.652210095251002
161	MAP7	0.652119133922183
162	THOC6	0.651405852038467
163	ERRFI1	0.650082131989505
164	PTPRK	0.649878451198732
165	C2orf82	0.647968991100724
166	EIF3G	0.64759344923284
167	JMJD7	0.645902526970618
168	SPTBN5	0.645403818761365
169	EPHB6	0.645399974181142
170	HOXC10	0.645086936983354
171	HEXA	0.644600666304238
172	SPTBN2	0.644055719578874
173	TYMS	0.643332774122056
174	STXBP6	0.642580562837992
175	VPS36	0.642368296347803
176	ARSA	0.641913684402051
177	C10orf128	0.641712947291192
178	IL1RN	0.640503710932075
179	RSAD1	0.639532727014194
180	ABCD3	0.639173464336244
181	SETD6	0.638826459762155
182	AC139100.2	0.638801498127341
183	C1orf35	0.638609951186633
184	OSCP1	0.638189323540309
185	FEM1B	0.637395562773321
186	C3orf17	0.636895992338249
187	GGH	0.635187543942573
188	TRAF4	0.634734426356781
189	SCMH1	0.633797257582233
190	ALOX15B	0.633341133296923
191	NUP160	0.633006096348638
192	AMDHD2	0.63247359836312
193	RSRC2	0.632004194282539
194	PIK3C2G	0.630193273345426
195	HAL	0.629624187465452
196	MPND	0.629278593717403
197	ZG16B	0.629082708954681
198	LGALSL	0.62824317967578
199	NAT9	0.627338169510311
200	KANSL2	0.627077414647589
201	FAT2	0.626539974235393
202	TRAF3IP3	0.625473752059082
203	PEX16	0.625299644786029
204	C1orf21	0.624961732983731
205	IL7	0.624753192507771
206	ITGB3BP	0.62407191934231
207	GPRIN2	0.62348486906397
208	AASDHPPT	0.623125390112301
209	DAB2IP	0.622250824645925
210	TTC13	0.622130938730029
211	PACS1	0.622099043431773
212	RAPGEF4	0.621973904967381
213	PRSS23	0.621368659997544
214	PFKFB4	0.620917216403509
215	DTX3	0.620676746669026
216	TNIP2	0.620272601648312
217	MFAP3L	0.619564590985303
218	CREBRF	0.619397306263105
219	LHX2	0.619148936170213
220	PRKD3	0.618876414863318
221	ZNF514	0.618786002429427
222	PTPRZ1	0.618181997953302
223	PKMYT1	0.617889849388661
224	ANKRD28	0.617650601380022
225	INO80	0.616469898324379
226	TRERF1	0.616193600487403
227	KRT80	0.615920529259006
228	TAF4	0.615833325231628
229	CEP250	0.615469259531063
230	XPNPEP1	0.615463643849403
231	CEP95	0.615261238365082
232	LYVE1	0.614812674995695
233	AP4B1	0.614491354251273
234	ASXL1	0.614412093324958
235	PIK3IP1	0.61429323267143
236	SMYD5	0.614260427007541
237	TMEM18	0.614154018952572
238	MEF2B	0.614096842687127
239	CHIC2	0.61384116351699
240	BUD13	0.613818316809819
241	CDCA7	0.613738050108887
242	NAE1	0.611940322439755
243	GGA3	0.611551902468221
244	KIAA1109	0.610432935856813
245	DCUN1D5	0.610096681092376
246	WDFY2	0.609357857341948
247	SOX5	0.608834120267455
248	SMARCB1	0.60877462966078
249	CNNM2	0.608334371316349
250	MED13	0.606231456471714
251	RICTOR	0.606199700717553
252	ZNF623	0.605193245176791
253	FAR2	0.604840042409299
254	AGFG2	0.603454541834314
255	NDEL1	0.603394120663926
256	NUSAP1	0.603387117522799
257	NGEF	0.603326799149469
258	PINLYP	0.60322600142229
259	EIF5B	0.602691391130567
260	ADH6	0.602217477787487
261	EML2	0.602207106366325
262	KCNIP3	0.602067760098551
263	GATAD2A	0.601768441778901
264	TRNAU1AP	0.601244775256526
265	TCEA3	0.601140104526762
266	DDX20	0.601045870959684
267	ZC3H15	0.599577496967913
268	C3orf52	0.597021486696655
269	CD99L2	0.59569682497097
270	MAGOH	0.595696366702953
271	MYEOV	0.595628677176676
272	FBLN5	0.595028971079619
273	MKS1	0.59410164822754
274	DHX37	0.5927365675245
275	ALOX12	0.592667145643984
276	FBXL16	0.591627975438036
277	TRIT1	0.590512822157285
278	DHX58	0.589779982269649
279	CYR61	0.589585890161504
280	GNRH1	0.589458318011492
281	GRAMD1C	0.589363714754299
282	RGS11	0.589251270921326
283	METTL10	0.58854803108152
284	SF3A2	0.587433353973389
285	PCIF1	0.587300871496327
286	RPL28	0.587111601607997
287	SARS2	0.587073958094578
288	GOSR2	0.586747733084093
289	INTS9	0.585841298122263
290	GYLTL1B	0.58541074837434
291	NR2F2	0.585026663413614
292	LANCL1	0.584918198097477
293	KRT78	0.584781012084892
294	PHB2	0.584507540964248
295	SORBS3	0.5843936128438
296	FMN1	0.583750751009184
297	INCENP	0.58262841839779
298	GRHL1	0.582174724256675
299	AUTS2	0.58169497172818
300	WFIKKN1	0.581344157475204
301	DHX8	0.581161983056254
302	MTMR2	0.580911028975061
303	RHPN1	0.579816054362156
304	HES1	0.579438665293142
305	ZNF384	0.579372531240019
306	YBX2	0.57905137841444
307	PWP2	0.578974069261099
308	TGIF1	0.578630911866029
309	FLOT1	0.57850832379257
310	CLIP2	0.57845961907996
311	ACBD6	0.577373289387127
312	PDIA5	0.576840917471402
313	MIPEP	0.576651904936452
314	ZDHHC13	0.576208508125122
315	ATG9B	0.575873093511856
316	SUSD4	0.575480316520385
317	LPHN1	0.575460836401578
318	EFNA5	0.575362500534088
319	TPCN2	0.574246306219735
320	AMBRA1	0.574067305082149
321	CLN6	0.573860602566091
322	AP1M2	0.57372787835965
323	SPATA7	0.573659672870458
324	SPINT2	0.573603192724015
325	ANGEL1	0.572968350674861
326	PI16	0.572855299065979
327	MTHFSD	0.572665916065809
328	USP30	0.57240531366841
329	TBX15	0.57176649148225
330	ADORA1	0.571437335809604
331	GLOD4	0.570739199549702
332	SLC16A11	0.570077151268033
333	ADPRM	0.56995655116267
334	KIAA0141	0.569913105409865
335	DNTTIP1	0.569843585819788
336	ALDH3A1	0.569770885910514
337	PVRL1	0.568829500915541
338	QSER1	0.568683049779458
339	LARP4B	0.56839418353227
340	SPAG5	0.567697292936617
341	MBNL3	0.567421577691481
342	KCNJ12	0.566876971608833
343	ALG8	0.566752606565872
344	RASSF7	0.56644018393921
345	PTPN21	0.566251594714691
346	SNX14	0.565659586642359
347	ZDHHC6	0.56527294341302
348	ATL2	0.564768273943588
349	ZFAND2A	0.564692230062686
350	PTOV1	0.564667775970204
351	MVK	0.564597404965738
352	EPHB1	0.564481300587248
353	S100A8	0.563942804694845
354	FJX1	0.563510637126326
355	FANCG	0.563443531938753
356	ACTL6A	0.56277720340416
357	TPRG1	0.562517367773352
358	ENY2	0.562336024729926
359	CERS3	0.561488616333777
360	MAU2	0.561452208945053
361	EIF2B4	0.561426721296895
362	RAB40C	0.56116828936761
363	ATP5SL	0.560879815731828
364	IL37	0.560747663551402
365	TNFSF13	0.560686270595176
366	SMAD5	0.560595672096057
367	C11orf24	0.560247136659419
368	RAB11FIP4	0.56012009412963
369	AQP3	0.560032134025845
370	MGME1	0.559995599959358
371	PLB1	0.559853125697572
372	GANC	0.559646638463602
373	HMGCR	0.559547408981833
374	POLR2A	0.559493611039702
375	MED14	0.558987913328377
376	WNT5B	0.558565485024167
377	KAT5	0.558485671127475
378	MYH10	0.558019850670115
379	IL1RL2	0.557530407328462
380	RAB3GAP2	0.557434004773592
381	L3MBTL1	0.557252069302816
382	ANKRD13B	0.55658292698871
383	ADAD2	0.556173526140156
384	MED26	0.556114915344367
385	CRY2	0.555871895862563
386	DHRS13	0.555094428532093
387	PDGFB	0.554802199358697
388	CEBPG	0.554123415196477
389	SNRK	0.553903165657054
390	ZNF287	0.553808328638017
391	FTSJ3	0.553254500820892
392	RQCD1	0.553213076945077
393	GARNL3	0.553128247998802
394	TRIM26	0.553109310611601
395	HGS	0.552836222793329
396	PCYOX1L	0.552607717849004
397	COL11A1	0.551490783057827
398	XPA	0.551334115890717
399	SLC25A35	0.551208285385501
400	AURKB	0.550672934839936
401	SLC9A3R2	0.550304457269969
402	LY6G6C	0.550154664338206
403	DNAH1	0.550098738702859
404	BCL7B	0.549867001262656
405	RHBDD3	0.549864675177299
406	LGI4	0.549562730919639
407	MCOLN3	0.548733552292162
408	PIGU	0.548724845822739
409	SLC6A9	0.548562300319489
410	EDC3	0.548474997576372
411	LPAR2	0.548132493525463
412	ARMCX2	0.548003433857745
413	TEAD4	0.547197275035533
414	TMPRSS13	0.54657571686708
415	FBRS	0.546334374408597
416	NGDN	0.546238288692678
417	ZNF646	0.545611934017107
418	DHRS1	0.545438923553702
419	TOM1L2	0.545398957533186
420	MCTP2	0.544915264470408
421	HPGD	0.544641461939705
422	DYNC2H1	0.544584503317538
423	RRAGB	0.544550029799351
424	NKTR	0.54447771437839
425	SOCS7	0.544412271115112
426	MDGA1	0.544408822595488
427	UBAC1	0.54426890826402
428	UBE2E2	0.544263348004959
429	PCSK6	0.54406202694198
430	SMPD2	0.543921806287197
431	ARMC7	0.543780686723489
432	FAN1	0.543513740665935
433	EXOC1	0.543448936682473
434	ZBTB45	0.543145363194305
435	ZNF438	0.543073731470132
436	PCDH7	0.543040597083945
437	CDK2	0.542757434885983
438	ZDHHC17	0.542742582197273
439	LRRK1	0.542716498816779
440	NMNAT3	0.542552060391573
441	DCK	0.542430082518563
442	RPUSD1	0.542380190968106
443	FAM19A5	0.542296249480341
444	ARHGAP8	0.541587889544829
445	FAM84A	0.541183679050785
446	PANK1	0.541117087598053
447	WDR18	0.540907482403851
448	CDK20	0.540893032420462
449	COX19	0.540326303121545
450	ATP2A3	0.540121926596194
451	NAT6	0.539981325306428
452	DPH2	0.539303042625177
453	CELF1	0.539202733377166
454	ZC2HC1A	0.539011676787721
455	PI4KB	0.539000095382167
456	TCERG1	0.538643214778615
457	RBM45	0.538432062122636
458	ACAD9	0.53833901119087
459	MCTS1	0.538223647592835
460	PPRC1	0.537746104286824
461	FER	0.537382241349822
462	ZNF217	0.537347116330531
463	DLX5	0.537111576235711
464	TMEM52	0.537073090698319
465	PLRG1	0.536785807367476
466	ADCK2	0.536629450388921
467	EMG1	0.536602403661515
468	DKC1	0.536335923292082
469	C10orf137	0.536269129682175
470	MRPL47	0.535891099433798
471	SLC27A4	0.535603653717361
472	UROD	0.535478177236244
473	GRB7	0.535011652532279
474	CDK1	0.534368459410196
475	SIPA1L3	0.534337898642363
476	EHF	0.533806680651928
477	ATXN7L1	0.53346474936627
478	FAM104A	0.533315163566693
479	LSR	0.533305024394343
480	TINF2	0.532986731035665
481	MPP3	0.53291359198833
482	TRPV6	0.532814066717933
483	FAM76B	0.532717704999914
484	CCDC93	0.532516543329592
485	E2F4	0.532305093927758
486	APBA3	0.532109275890411
487	PSORS1C1	0.531888109729863
488	SYNE2	0.530493992344998
489	RFXANK	0.530266046426547
490	ATP13A1	0.529887049164562
491	HAO2	0.529773462783172
492	MB	0.528538248847737
493	CDK19	0.52796823805861
494	SH3D21	0.527949712768005
495	NAT10	0.527840281717082
496	FAM229A	0.527511763732236
497	KCTD13	0.527415269252812
498	PAQR4	0.526436836468012
499	XPC	0.52638068467742
500	NKD2	0.526184685694238
501	SCEL	0.525982176001909
502	NUP85	0.525768805171168
503	TEX264	0.525524494303026
504	L3MBTL4	0.525165839213353
505	MVD	0.525075533810416
506	RCHY1	0.525018105143342
507	STARD3	0.524663363941854
508	EML1	0.524418752822337
509	CYFIP1	0.524157070927233
510	VCP	0.52396917695592
511	IL1R2	0.523966468817626
512	PRRT2	0.523914998645712
513	SMAD7	0.52384550161462
514	CTTN	0.523307812635771
515	TAOK2	0.523290967316193
516	PON3	0.523186362473591
517	USP1	0.523177415553014
518	MRPS6	0.523073425682052
519	ARV1	0.523068590840838
520	KDM6A	0.52259105986777
521	SYT8	0.522426296920748
522	ARHGEF26	0.52212450022718
523	SLC35B1	0.522092269642902
524	HSPBAP1	0.522016496472729
525	OAS1	0.52199442680298
526	DCAF15	0.521316287944978
527	NIPAL3	0.521248487264947
528	IDH3G	0.521101689275483
529	DUSP2	0.520757376839701
530	KMT2E	0.520590424994006
531	KLK8	0.520272221868327
532	SFRP1	0.519967000046185
533	CYBA	0.519958811895339
534	ZNF605	0.519940757031613
535	SGK494	0.519838109649234
536	FST	0.519583055069081
537	FGFRL1	0.519503096365647
538	RPA3-AS1	0.519475193566339
539	TFAP2A	0.519322573193088
540	EPHA1	0.51920990302272
541	IQGAP2	0.519197860333527
542	ASPG	0.518787871883711
543	FNDC4	0.518657673308625
544	ST7L	0.518111654008859
545	SOS1	0.517796651516801
546	PER3	0.517331289511554
547	NEK3	0.517268059256545
548	PHRF1	0.517234650295838
549	NUDT18	0.517133537532019
550	EGFLAM	0.516947127571713
551	GAA	0.516600881373858
552	ARVCF	0.516578394404093
553	CHD1L	0.516519276813711
554	STAG1	0.515893902157733
555	NAPA	0.515456217471725
556	ALG6	0.514767722511135
557	CD69	0.514692384709599
558	KDM5A	0.514481096591969
559	EMC9	0.514330705423701
560	EBNA1BP2	0.514233684291383
561	WEE1	0.51412691702153
562	ANKS6	0.514012498460057
563	B4GALNT3	0.513922486025054
564	REXO1	0.513477587295111
565	MYBBP1A	0.513352054119814
566	CRTC2	0.512827981936421
567	TNK2	0.512282998723889
568	NBN	0.512126986782958
569	C3orf14	0.512046396043867
570	PSMC3IP	0.5119943349407
571	AJUBA	0.511831999211319
572	NHSL1	0.511646088118818
573	WDR52	0.511599354881551
574	DERL2	0.511529972848725
575	AQR	0.511264262587724
576	MIOS	0.511226117015595
577	FAM98A	0.511171571406127
578	ATP2C2	0.510986113504333
579	CDC16	0.510928627924681
580	PEX11B	0.510862187117371
581	SLC35D2	0.510854298928086
582	CDCA3	0.510842034172674
583	NFKBIE	0.510769846109997
584	RAE1	0.510753428545069
585	RP11-195F19.5	0.510379782168858
586	C21orf91	0.510027199876457
587	CC2D1A	0.509724212186704
588	ATP5G1	0.509504691313332
589	LYG2	0.509025270758123
590	SPRED2	0.508687058409075
591	ATP10B	0.50859895417655
592	CHTF18	0.50855916523099
593	NR1H2	0.508391201637286
594	PDE9A	0.508268187004413
595	COL27A1	0.507994517610391
596	NPAS1	0.507878643539322
597	HAGHL	0.507809803344676
598	SEMA4G	0.507807720329982
599	SGK2	0.507578438798076
600	EFNA1	0.507285243346125
601	WDR70	0.507079319883487
602	DQX1	0.506820049301561
603	ZNF862	0.506809596856357
604	ARG1	0.506781618667237
605	NFXL1	0.50654026263843
606	ZWINT	0.506490989670365
607	STAM2	0.506419020090361
608	ZNF410	0.506406191123063
609	LANCL2	0.505926367617535
610	BBS1	0.50552112376123
611	MOV10	0.505489043523361
612	EPHX2	0.505339553871869
613	ACP5	0.505171072831356
614	TCF19	0.505117536965332
615	OSBPL6	0.505023773732322
616	DLG4	0.504827214368755
617	PPP3CC	0.504575926705239
618	SREBF2	0.50419939115207
619	SMC4	0.504151506996633
620	SLC22A23	0.503837200580133
621	VPS52	0.503828347896426
622	ENTPD5	0.503522190700974
623	MICAL2	0.503408072960291
624	LMNB1	0.503127719936247
625	TFPT	0.502642170478618
626	ZC3H18	0.502581870309234
627	NR2C2	0.502216137178724
628	SLC22A5	0.502163432330184
629	PLP1	0.501830476706503
630	LEMD3	0.501484601431738
631	GLMN	0.501476088262577
632	RTN2	0.501246222090482
633	RNF19A	0.501156125010417
634	MBD3	0.501034745881781
635	ARHGAP19	0.500548827030246
636	A2M	0.499641582080887
637	FAM219A	0.499360717313628
638	CLUH	0.499292013226463
639	IL15RA	0.499281431052149
640	POMT2	0.499247614267133
641	ALDH3A2	0.499247208251919
642	SMC6	0.499221176012823
643	PXK	0.4991415102826
644	SENP1	0.499108427287309
645	NUP133	0.498961929041923
646	ZNRD1	0.498826883427313
647	TRIP4	0.498611606314153
648	PTRHD1	0.498495151042247
649	ZNF839	0.49835057912288
650	SLC35B3	0.497990452569375
651	CCDC19	0.49779650132717
652	ACY1	0.49777045160127
653	NTM	0.497685190875486
654	UNC50	0.497586671071608
655	POLI	0.496838562672923
656	ERI3	0.496760436038661
657	CCHCR1	0.496682377418528
658	TJP3	0.496672532116901
659	FZR1	0.496553515935944
660	CMTR2	0.496442164487837
661	CIZ1	0.49628373332218
662	RSBN1	0.49617569444155
663	TLE2	0.496163930179983
664	ERMAP	0.49613165063803
665	AASDH	0.495873596935492
666	NIT2	0.495544309787273
667	IFITM10	0.49501856199064
668	APEX1	0.495007800468625
669	DHX34	0.494899254416108
670	DPYSL2	0.49484698700278
671	RCC1	0.49480622587003
672	SMARCD1	0.494687017001546
673	CORO7	0.494511573292428
674	TMEM106C	0.494273556356072
675	ZNF584	0.494261265550714
676	FAM109A	0.494200910118382
677	CNTFR	0.494072582858482
678	LRRFIP2	0.493790735590885
679	NELFCD	0.493408887615782
680	TRA2B	0.493233989562117
681	HMGCS2	0.493200663349917
682	KIAA1468	0.493129058132331
683	CREB1	0.493064158268595
684	PLA2G4D	0.492950738099187
685	WDR37	0.492602390704459
686	ERMARD	0.492547970682782
687	DPP8	0.492316290501392
688	ALAD	0.492249911383882
689	TANC2	0.4919627957584
690	NELL2	0.491409088790977
691	CREB3L4	0.491023855938967
692	SPATA5L1	0.490692712620312
693	NEO1	0.490370998664099
694	FBXO22	0.49031783841652
695	ALKBH6	0.490142762362069
696	GTF2H4	0.49000469393567
697	ZNF143	0.489840990970909
698	BPIFC	0.48969414893617
699	ARHGEF18	0.489481070815121
700	IGSF9	0.489117262454958
701	SNRNP70	0.489094929328758
702	ZCCHC14	0.488994814238642
703	TMEM176A	0.488790245323484
704	PRKDC	0.488348781547069
705	GORAB	0.48818553343696
706	SP110	0.488048493836149
707	ORAOV1	0.487904015627507
708	FADS3	0.487857791316942
709	VIT	0.487687137674116
710	TBX18	0.487657413243736
711	FCHSD2	0.487334512169361
712	UCK1	0.487128170176273
713	C19orf66	0.487081585166198
714	MON1A	0.486921445936941
715	PPAN	0.486871564171085
716	RIPK3	0.486468096725501
717	QDPR	0.486249776574025
718	LCP2	0.486147145964576
719	TMEM194A	0.485463773871563
720	SKIV2L	0.485449493352856
721	PYROXD2	0.484892567468685
722	GAS6	0.484874639128263
723	MAPK15	0.484777318292164
724	CKAP5	0.484430518297474
725	FN3KRP	0.484287885884509
726	DTNB	0.483899732487863
727	DMAP1	0.483814569921084
728	SLC44A3	0.483579129130752
729	TSFM	0.483486399469835
730	SLC37A4	0.483231248569642
731	KPTN	0.483210278309418
732	BBS7	0.483174473923259
733	PPP1CA	0.482873931746811
734	DCBLD2	0.482605505517256
735	DUS3L	0.482496430589028
736	FAM183A	0.482478119899014
737	KHNYN	0.48236038742001
738	ASIP	0.482124958235884
739	NUDT14	0.482076424183686
740	BAMBI	0.481709250500337
741	REPIN1	0.481697088231829
742	DIDO1	0.481565137309919
743	MUM1	0.481486348599096
744	CENPM	0.481200830563303
745	CNPY3	0.481114161590679
746	TAF6L	0.480882612407539
747	DHRS7B	0.480806463089949
748	NR1H3	0.480528173687905
749	PLCG2	0.480171328577045
750	BLNK	0.479770337531927
751	PDE5A	0.4792872001348
752	AQP1	0.479053587530211
753	AMN	0.478960316165238
754	COL7A1	0.478449050608103
755	STK36	0.478391343394739
756	NOD1	0.478256104105369
757	CSNK1G2	0.478009760154032
758	IP6K1	0.477855142896352
759	ANAPC4	0.477733106243795
760	USB1	0.477616094606288
761	DPAGT1	0.477352012039117
762	JOSD2	0.477067932809409
763	TSN	0.477060182131271
764	NRF1	0.477049328003759
765	TTC37	0.476992476685625
766	CAMSAP3	0.476984834362734
767	LRRC16B	0.476781223805532
768	TAF2	0.47660351738518
769	PHF7	0.476504227852805
770	FAM213B	0.476418556852382
771	SYNGAP1	0.476347277962501
772	TSPAN4	0.476330588150254
773	UBAP2	0.47619769327155
774	KLK11	0.476139590575809
775	DDX49	0.475828938653149
776	MUS81	0.475459275872224
777	SPINK5	0.475054468184469
778	DDAH2	0.47501269293648
779	MAP2K7	0.474895916536318
780	SLC25A24	0.474767236761092
781	TOP2A	0.474758781459366
782	ULK1	0.474369660445603
783	PCYT2	0.474129950085064
784	AP1AR	0.474054714106493
785	CEP72	0.473902598711598
786	PIGN	0.4738948187752
787	ZUFSP	0.473661511585462
788	DCAKD	0.473586116746163
789	IRX3	0.473584975381431
790	AIM1	0.473552245281972
791	MEF2BNB-MEF2B	0.473405241865846
792	C15orf59	0.473219845847016
793	TMEM222	0.473219627935215
794	LDB2	0.473064025979242
795	SEMA6A	0.47283013698806
796	GGNBP2	0.472778730647358
797	ARHGAP35	0.472603352951552
798	MAPKAPK5	0.472260746022186
799	ODC1	0.47219974697191
800	WDR54	0.472170952912613
801	UBE2A	0.471933304937764
802	PIAS3	0.471903363729344
803	PLD1	0.471871494586017
804	PTPRU	0.471710369780081
805	RFC5	0.471566998885246
806	FOXM1	0.471461734314173
807	DUS2	0.471241082527088
808	CCDC64B	0.47107962648186
809	TFE3	0.470972460562871
810	NAF1	0.47086182150566
811	PGLYRP4	0.47070543567879
812	TDRD7	0.470481465898106
813	TMC8	0.4704571384832
814	TRAPPC6A	0.470301000565634
815	STAT6	0.469907413301216
816	VPS8	0.469858100743177
817	MARK3	0.469624482073067
818	NUDT12	0.46949780979941
819	UHRF1BP1L	0.46948427868341
820	ARHGAP32	0.469438082279263
821	PPP1R1A	0.469307858431035
822	SUV420H2	0.469110348478059
823	AKAP1	0.468878744173804
824	ID1	0.468546643400773
825	SOGA2	0.468522461251155
826	DCP2	0.468482176017375
827	TBC1D2	0.468468654438196
828	PIH1D1	0.468301486384745
829	KLK6	0.468235792102597
830	DBP	0.468139820671237
831	ZFPM1	0.468097159820117
832	FAM110A	0.467898039576076
833	ABCG1	0.467803994657475
834	GPR126	0.467799260258283
835	FADS2	0.467692426435409
836	PLEKHA7	0.467555124458401
837	CARD10	0.467517679428178
838	ADCK5	0.466955469865034
839	PNKP	0.466914721168305
840	SMYD2	0.466655099673993
841	TMEM88	0.46657407753495
842	PPT2-EGFL8	0.466516846180079
843	COBL	0.466386529397509
844	MTERFD2	0.466353487621334
845	B3GNTL1	0.466150602782881
846	LTBP2	0.466070376695722
847	ZNF516	0.46594989428605
848	TSC1	0.465655872299526
849	ENTPD2	0.465615497976594
850	MLKL	0.465500727414217
851	TTC12	0.465393220729506
852	TIA1	0.465356624469729
853	TBL3	0.465144337853519
854	HPS4	0.465020063134532
855	ZNF502	0.464676474717693
856	CD58	0.464176131267643
857	TBC1D13	0.464172419223515
858	CIC	0.463872886267216
859	XPO5	0.463669287810452
860	IDH3B	0.463549954018725
861	XRCC4	0.463506460972083
862	TRMT1	0.463403524560351
863	C16orf13	0.463240297537689
864	SLC4A11	0.462900584299805
865	COMTD1	0.462791156641661
866	BRPF1	0.462261071566806
867	GPBP1	0.461940125073626
868	FBXW7	0.461928526103739
869	CPB1	0.461884384229643
870	CCDC174	0.461796858584381
871	DRG2	0.461784380512171
872	C1orf116	0.461771888911598
873	CDIP1	0.461683536298011
874	HCN3	0.461565122655351
875	C12orf10	0.46151096866239
876	PIK3CB	0.461479205915106
877	PPFIA3	0.461460795856784
878	CTBS	0.461371112684989
879	INSIG2	0.461347278097331
880	SLC29A1	0.461298549118594
881	ARHGEF19	0.461267886609596
882	TARBP1	0.461241280816848
883	ADCY2	0.461090189048102
884	SNAPIN	0.461000188443599
885	COL5A1	0.460954966464388
886	ATAD2B	0.460796972226893
887	TRIM29	0.460479910018144
888	GOLM1	0.460316140163165
889	KMT2A	0.460221111422513
890	BTD	0.460175848246953
891	ANO1	0.460166078556524
892	CUL2	0.46000528008247
893	NUDCD3	0.45974869804039
894	RANBP10	0.459688350317677
895	NDRG4	0.459680724707853
896	C1orf54	0.459630478597806
897	EDIL3	0.459532312015849
898	INTS10	0.459288863863485
899	IL1RAP	0.459284511319042
900	OSR2	0.459231617137488
901	IL34	0.458928740161982
902	GAS8	0.458576543233048
903	ZSCAN32	0.458384643706948
904	TRAF3	0.45786850518819
905	PEX5	0.457802008104589
906	LAMA3	0.457764161065019
907	DENND4B	0.457707758473965
908	KLK5	0.456735388078373
909	CDKN2AIP	0.456453526561065
910	PTPN4	0.456293463133936
911	SCAPER	0.455887948876721
912	ROBO3	0.45565401109128
913	STX5	0.455640871733679
914	LEPREL1	0.455317784723892
915	XAB2	0.455160496448984
916	NCS1	0.455092020767718
917	ZFP36L1	0.454881523840245
918	PITX2	0.454858797283435
919	RPS6KB2	0.454830614805521
920	SLC35B2	0.454712527863312
921	FAM118B	0.45461504045943
922	LAMC1	0.454610774781386
923	MARVELD1	0.454274531286537
924	NCF2	0.454163668114206
925	MIS18BP1	0.454116456947224
926	TEFM	0.453807179676339
927	LITAF	0.453607883946203
928	TMTC2	0.453311384492962
929	HERPUD1	0.453179855718715
930	UBE2Q1	0.452970029929185
931	F12	0.452920143027414
932	ZDHHC9	0.452579301111655
933	PLCH2	0.452469082415115
934	ABTB2	0.452379440109148
935	MPP5	0.452310416846614
936	GDPD3	0.452287261356545
937	TWIST1	0.45219278754098
938	VEGFA	0.452106005440483
939	USP15	0.452011422677821
940	YIPF2	0.451998154393981
941	PPP2R5D	0.451845427992102
942	CYB5B	0.451580679391514
943	HIST1H2AC	0.451401068075851
944	POLR2H	0.451125133560181
945	DYM	0.450898970102415
946	TNS1	0.45086801854905
947	ABCA7	0.450625199177944
948	IFT57	0.450410656764956
949	TMEM55B	0.450346683451101
950	CRIM1	0.450266882200425
951	SSH3	0.449944699678021
952	CAD	0.449837738989147
953	CBFA2T3	0.449713229185687
954	VIPR1	0.449296750295468
955	NPAT	0.449087068107115
956	CCDC59	0.449047987527943
957	TLE3	0.448995339390742
958	RP4-758J18.2	0.448455641033735
959	GALNS	0.448391628852562
960	IRX2	0.44838161270253
961	JMJD4	0.448301695423164
962	ZNF821	0.448221159210086
963	EPDR1	0.448192176862681
964	ZFYVE28	0.448145586835569
965	CTCF	0.448104758256758
966	METTL3	0.448068245606702
967	ELL3	0.447970790292462
968	POT1	0.447912371206981
969	DFNB31	0.447812151114632
970	ARMC6	0.447775584052344
971	NAPEPLD	0.447324813542284
972	RBM47	0.447065300792639
973	MLH1	0.44662079200534
974	CHD7	0.446577849057833
975	NPHP4	0.446416342498817
976	TMEM63A	0.446369337110914
977	MAMLD1	0.446353340990462
978	ARHGAP40	0.446253171421267
979	YDJC	0.446164598135716
980	USP19	0.446069709376443
981	YTHDC2	0.446029617884188
982	PAMR1	0.445718272582541
983	FUT10	0.445714285714286
984	TTC8	0.445610065913788
985	SERPING1	0.445308926560926
986	SRPRB	0.445142124101575
987	GCDH	0.444961017246028
988	TPP1	0.444630508910025
989	RPS6KA4	0.444373489002358
990	AAAS	0.444247491149526
991	ASB13	0.444135119635469
992	MED7	0.444015741714092
993	CEP350	0.443951693406906
994	SCN4B	0.443790746477772
995	GEM	0.443710222365456
996	CAMK2G	0.443677614202493
997	FCHSD1	0.443574051762509
998	MCEE	0.443526600216241
999	C1orf159	0.443180441853878
1000	SERTAD2	0.443023486788472
1001	VPS33B	0.442925535337406
1002	MEN1	0.442845300057183
1003	EPS8L2	0.442524912448238
1004	CXCR4	0.442351904572713
1005	DHX57	0.442201933213927
1006	CTC-349C3.1	0.441981078587439
1007	UCKL1	0.44190381731927
1008	TMED5	0.441799916906331
1009	KLK13	0.441776710684274
1010	PPT2	0.441774872149323
1011	CNTNAP1	0.441613369004976
1012	CES4A	0.441487644603865
1013	HDAC4	0.441387071256513
1014	MED12	0.441379802226435
1015	KRT5	0.441287068641988
1016	DENND1A	0.441038163979921
1017	PRCC	0.441031266950899
1018	IFIT5	0.440976678777511
1019	SLC2A8	0.440701268995661
1020	MAMDC4	0.440656689325786
1021	C1orf162	0.440563065757467
1022	FASTK	0.440431317852124
1023	ZNF507	0.440315440939618
1024	PPP1R10	0.440124797842108
1025	ATP6V0E2	0.440054427391338
1026	SIDT2	0.440048266305209
1027	POMT1	0.439945863903034
1028	EZR	0.439780934887191
1029	RBBP8	0.439248555126553
1030	AIM1L	0.438989388646256
1031	SH3PXD2B	0.438831615120275
1032	SFMBT1	0.438799070419253
1033	DNPEP	0.438696373002135
1034	FAM208B	0.438637484335589
1035	RBP5	0.438549923307953
1036	PIGO	0.438449930852405
1037	NLRX1	0.438043321758111
1038	EMX2	0.438019678204704
1039	POMC	0.437972722446102
1040	USP31	0.437874718668395
1041	TOPBP1	0.437568720909865
1042	DMXL2	0.437537235943963
1043	JAK2	0.437406335175661
1044	MYL3	0.437338731840551
1045	GORASP1	0.437103885079221
1046	PDCD11	0.43698268805142
1047	CHL1	0.4368630972598
1048	SEMA4D	0.436840710168048
1049	SEPT1	0.436827678255239
1050	CAPN8	0.436793258431642
1051	TEX261	0.436700080308942
1052	CCDC77	0.43649914342817
1053	TESK2	0.436319064888155
1054	KDM3A	0.436313613794502
1055	TMCC3	0.436110301854175
1056	KLC2	0.436051656024936
1057	KDM1B	0.436037903612247
1058	SFRP4	0.435772640314381
1059	PRSS22	0.435710722100507
1060	C16orf52	0.435698009158199
1061	TMEM79	0.435686033407726
1062	CCNH	0.435552722204514
1063	FECH	0.435504719577906
1064	ITPR2	0.435274370052055
1065	TRIM39	0.434993305899843
1066	PLAGL1	0.434830083368989
1067	KLHL18	0.434758409324376
1068	GAS2L1	0.434455394665404
1069	TRIP10	0.434349116228219
1070	FBXL6	0.434319499256749
1071	UBQLN1	0.434217767867519
1072	ANXA4	0.434189026340905
1073	ZFPL1	0.434158841740383
1074	RINT1	0.433929271361506
1075	VPS4A	0.433914025899587
1076	RNF34	0.433836059599323
1077	RPP40	0.433687061287527
1078	SMG9	0.433279354949039
1079	TUBA4A	0.433264465767412
1080	C1QTNF3	0.433194958788451
1081	PLK2	0.433150896712726
1082	PCM1	0.433092719300812
1083	FAM188A	0.432967240972104
1084	hsa-mir-1199	0.432901632341786
1085	PPP2R3C	0.432587357627699
1086	FXR2	0.432567790105286
1087	EIF6	0.432560936099614
1088	RBM20	0.432381658487443
1089	PRRC1	0.432234012488655
1090	GCLC	0.432208492228556
1091	ARL4C	0.432134698538896
1092	SRPK1	0.432016026305002
1093	PDE7A	0.431996706798014
1094	PM20D1	0.431826026924404
1095	MIIP	0.431636685252041
1096	ABCF3	0.431588386239014
1097	MLH3	0.431555233693907
1098	TTC38	0.431467733826604
1099	ANO6	0.431170659022914
1100	AMOTL2	0.431110849001629
1101	PPP4R1	0.431003385933366
1102	TSPAN5	0.430763406050506
1103	USF2	0.430605610064329
1104	MYNN	0.430521384949029
1105	STAB1	0.430507839372924
1106	HLA-DQB1	0.430410729605873
1107	C1QTNF1	0.430299982009574
1108	ARHGAP4	0.430162236072933
1109	SDK1	0.430153143096001
1110	ZNF232	0.429913391211415
1111	FAM57A	0.429821478517049
1112	CHI3L2	0.429781264035957
1113	OLFM2	0.429768065224675
1114	ERAL1	0.429764539801065
1115	UBE3B	0.429498581209833
1116	NTHL1	0.429426259069338
1117	CACNB1	0.42942260074266
1118	MOXD1	0.429409907539339
1119	EDEM2	0.429279869131121
1120	WLS	0.429164028317232
1121	BNC2	0.428891385203719
1122	LRRC61	0.428829309995023
1123	ZNF740	0.428348692924259
1124	PKDCC	0.428311831195078
1125	NARFL	0.427931460504371
1126	CIDEA	0.427730028162346
1127	PLEKHO1	0.427701525635627
1128	KRT13	0.427644217283579
1129	PML	0.427509352141319
1130	SCUBE2	0.427377051849553
1131	ANAPC10	0.427233691845196
1132	HLF	0.427223946697292
1133	KIFAP3	0.427052159851308
1134	MAPK13	0.426908034105633
1135	HLA-DPB1	0.426715377741227
1136	LRP4	0.426560074014788
1137	UBR5	0.426530920966833
1138	TRAPPC9	0.42647186719481
1139	PANK4	0.42642434311975
1140	TMEM8A	0.426322022558043
1141	HLA-DOB	0.42611741110993
1142	SMARCAD1	0.426086277965343
1143	PPP1R3E	0.425910285522293
1144	KDM5C	0.425626659860819
1145	ADCY7	0.425600761750217
1146	IMP4	0.425414087611992
1147	ANKRD29	0.425191341765031
1148	SGSH	0.42513377882494
1149	ACKR3	0.425023462845247
1150	MRPL1	0.42499124439762
1151	CEP85	0.42492683996804
1152	YWHAH	0.424870919691077
1153	ITPA	0.424820960867987
1154	MIA3	0.424747261624994
1155	SPICE1	0.424598239085592
1156	CDKN2B	0.424170748323046
1157	SDCBP2	0.423983515042343
1158	SMYD3	0.423745277186757
1159	MIEF1	0.42356038792686
1160	MCU	0.423456293293769
1161	SHKBP1	0.423305369067949
1162	C6orf136	0.423293638015433
1163	LGR4	0.423099817365763
1164	SLC35A2	0.423058563945319
1165	TMEM109	0.422991479654822
1166	TRMT44	0.422966699891726
1167	ATIC	0.422961270758469
1168	PHPT1	0.422799112264256
1169	GLUL	0.422663420435937
1170	NRM	0.422580147538842
1171	CPZ	0.422449611090982
1172	DLG3	0.422414186106398
1173	ZNF202	0.422194040702832
1174	PIK3R4	0.421809248166589
1175	PRICKLE4	0.421775775911409
1176	RNMTL1	0.421747437901685
1177	NUP107	0.42173215681551
1178	FUK	0.42168333369245
1179	PRIMPOL	0.421589074333884
1180	VWA9	0.421477476962181
1181	KAT8	0.421405867197436
1182	DTX1	0.421368851240331
1183	SHC2	0.421313748647347
1184	OSBPL5	0.421139434806996
1185	PAK1	0.421057993452178
1186	ILK	0.421035209448214
1187	TFB1M	0.420952441741707
1188	SEPT4	0.420785318316791
1189	STON2	0.420735140298186
1190	NUPL2	0.42057386544505
1191	ATG7	0.420563669659208
1192	UNKL	0.420397276167533
1193	CEP192	0.420247966017719
1194	PXMP2	0.42021573656559
1195	CRY1	0.420137103251684
1196	ATP7A	0.419997284566091
1197	PPARG	0.419985536218069
1198	ASCC3	0.419890742391267
1199	L3HYPDH	0.419862291358189
1200	TSPAN8	0.419685033635366
1201	MAP3K10	0.419544968977539
1202	SAT2	0.41943096619029
1203	EDNRA	0.419399701959573
1204	CYP2E1	0.41938839398603
1205	RC3H2	0.419363022382148
1206	MCRS1	0.419354984615585
1207	MED25	0.419266608521495
1208	C12orf66	0.41902835260879
1209	PDGFD	0.418888044367726
1210	NUP54	0.418833341801649
1211	TOP1MT	0.418798861901257
1212	LY6G6D	0.418726070309781
1213	DST	0.418708682657999
1214	FBXO4	0.418704577819557
1215	METTL13	0.418566169988254
1216	PPME1	0.418514373537131
1217	MDP1	0.418421653417684
1218	HACL1	0.418392112693291
1219	ARRB1	0.41832141790549
1220	TUBE1	0.418175550434246
1221	OVGP1	0.417900052237507
1222	PPP2R2B	0.417856961614028
1223	KLHL22	0.417582468949011
1224	DSC2	0.417312358027077
1225	THAP8	0.417273901584383
1226	BAHD1	0.417125963245723
1227	PCNT	0.416981465631074
1228	AGA	0.416883310153246
1229	NFKBIA	0.416839909210727
1230	SEMA6C	0.416764110746454
1231	INPP5D	0.416684241629926
1232	SPHK1	0.41651776515352
1233	ETNK1	0.416494668660509
1234	ARAP2	0.416419633426684
1235	GNPDA1	0.416409221160851
1236	HSPA14	0.416332165344765
1237	AGO4	0.416269316795803
1238	ATP6V1E2	0.41624542443786
1239	TG	0.416010027128048
1240	MORC2	0.415953871975896
1241	HDAC3	0.415769543526702
1242	TMCO6	0.415705468197753
1243	CECR5	0.415444257963077
1244	SLC25A17	0.415426884699835
1245	KLHL9	0.415348727646293
1246	PRG2	0.415309795221007
1247	IFT43	0.415298005207285
1248	GRB10	0.415207068781081
1249	SF3A1	0.415151471606906
1250	EIF2AK1	0.415115782706023
1251	JMJD8	0.414575828977526
1252	CGN	0.414570878098642
1253	SLC19A2	0.414308632211139
1254	LYPLAL1	0.414091281171592
1255	CHCHD7	0.413673031164761
1256	C14orf159	0.413526510547965
1257	PLEK2	0.413515338831895
1258	HID1	0.41337257395967
1259	CLDN7	0.413367629305338
1260	MLLT3	0.413362512233597
1261	AGPAT1	0.413063001877916
1262	PKHD1L1	0.413001917677741
1263	ZNF76	0.412907475076106
1264	CCNB1	0.412879258005123
1265	TSPAN17	0.412737205484482
1266	HEG1	0.412597622738824
1267	SMAD1	0.412535716737257
1268	EPHA4	0.412495363092413
1269	SMOX	0.412428595758601
1270	MTRR	0.412310033264084
1271	IL11RA	0.412272865880732
1272	SEC23IP	0.412121331968868
1273	ACAD10	0.411647333246184
1274	SLC26A9	0.411628508556506
1275	UBR1	0.411558226119798
1276	POGZ	0.411556608822649
1277	SART3	0.41140207804681
1278	C7orf63	0.411324872341362
1279	MED10	0.411142021704732
1280	DOCK7	0.411118573109455
1281	SRGAP3	0.41105873521411
1282	NUP37	0.410942972124333
1283	RTN4RL2	0.410920884577912
1284	PLAU	0.41077285746553
1285	GCN1L1	0.410661464634641
1286	ITGB7	0.41064045072852
1287	UNC5B	0.410624000438998
1288	KIF21A	0.410537666977
1289	RARS	0.410456046125674
1290	RCN3	0.410380635163778
1291	MINK1	0.409922860850493
1292	NUP188	0.409808144813942
1293	C11orf30	0.40977327135137
1294	PAPD5	0.409630430341974
1295	CTDSPL2	0.409586843222476
1296	UHMK1	0.409303900063255
1297	OLFML2B	0.409171638113228
1298	CPEB2	0.409043474077404
1299	AK8	0.408763464221191
1300	DIO2	0.408599688290706
1301	STX18	0.408555958983727
1302	IARS	0.408504169893921
1303	ECI2	0.408449439578245
1304	KIAA1432	0.408408086706519
1305	ERCC2	0.408392949894899
1306	ATG16L1	0.408343973427853
1307	IL6	0.407934235741023
1308	EFEMP2	0.407855438058809
1309	ZNF691	0.407845114852123
1310	CHKA	0.407827825229402
1311	CEP63	0.407801823774977
1312	ERI2	0.40767129509998
1313	RAB15	0.407661184550448
1314	VSIG10L	0.407240132434338
1315	MRPL13	0.40708012757901
1316	KIAA0020	0.406799716098031
1317	WRAP73	0.406758484914772
1318	MITD1	0.406725524878333
1319	LIN7B	0.406695154640068
1320	COG7	0.406671522600101
1321	PTCH1	0.406584983928909
1322	FASTKD2	0.406272144127624
1323	ZFAND1	0.406161037379942
1324	PPP1R8	0.405982097868716
1325	AVIL	0.405808771550745
1326	FAM211B	0.40576288829631
1327	FGD6	0.405686393916857
1328	COL6A2	0.405663249655037
1329	SEC14L2	0.405660048357074
1330	PLCB3	0.405636233717902
1331	MED8	0.405310202035061
1332	WNT3	0.405217856430595
1333	PPP6R3	0.404179726289316
1334	TRIP12	0.40407328384563
1335	MAP3K5	0.403708824815287
1336	CNOT11	0.403692904815237
1337	UBE3C	0.403548132770275
1338	AHDC1	0.403528053900003
1339	THAP7	0.403250399042306
1340	SYBU	0.403012089086779
1341	OPN3	0.402954656948011
1342	CA12	0.402907616128357
1343	DUSP14	0.402903227362067
1344	ENTHD2	0.402685372305484
1345	OXSM	0.402438976529887
1346	GOLGA1	0.402326813813134
1347	CCNT2	0.402221517809473
1348	STOML1	0.402140824514295
1349	CHADL	0.401982733893928
1350	POLG2	0.401872530420131
1351	FAM110C	0.401746471716483
1352	POLG	0.401675217616446
1353	RAB25	0.401605397657106
1354	ANKRD17	0.401395321797679
1355	HAUS7	0.400983616817673
1356	CALHM2	0.400849057152625
1357	TMEM150A	0.400772595190358
1358	C14orf132	0.400493643911212
1359	DCUN1D4	0.400396097228726
1360	HMGXB4	0.400300024372554
1361	ADA	0.400279956086241
1362	SART1	0.400117582780868
1363	AFAP1	0.400069364940166
1364	MON2	0.400039259997977
1365	HMG20A	0.400011013177422
1366	TAPT1	0.39994250400832
1367	CYB5R2	0.39984964144384
1368	LRIF1	0.399760774321639
1369	OLFM1	0.39968874015309
1370	NSMCE2	0.399618141390438
1371	KLHL20	0.399475010318342
1372	EXOSC9	0.399360590331193
1373	ZNF227	0.399357372814115
1374	ATG13	0.399299160465001
1375	PREPL	0.399267331464425
1376	MAP2K5	0.399202443764986
1377	ARFGAP2	0.399168016425483
1378	CEP70	0.399047166879684
1379	AGAP1	0.399045164103146
1380	TGFBR1	0.398901086668418
1381	GPR108	0.398816441064717
1382	SEC13	0.398784479092814
1383	FAM134B	0.398739119803225
1384	RAB26	0.398660556926331
1385	NSFL1C	0.398604385297827
1386	DZIP1L	0.398482705217138
1387	BCAT2	0.398477811625579
1388	ZXDC	0.398297961914475
1389	MAP1S	0.398022527269908
1390	CUL7	0.397902627124651
1391	NPAS2	0.397778311411315
1392	GAB1	0.397609041576564
1393	MFI2	0.397501922554384
1394	BCL2L1	0.39746006921209
1395	HLTF	0.397421168239039
1396	UBA3	0.397380352002591
1397	PICALM	0.397247498111544
1398	FBXO38	0.397146553994481
1399	TSTA3	0.397087606912924
1400	NCDN	0.397023558581699
1401	NHLRC3	0.397004446378492
1402	SLC9A9	0.396840154172979
1403	AHI1	0.396749775359173
1404	ILVBL	0.396632118150836
1405	HSPB11	0.396590289802206
1406	PLCB2	0.396581973564467
1407	SQLE	0.396559035874498
1408	ASUN	0.396381646597514
1409	PRPF31	0.396282272718252
1410	HERC3	0.396240034164679
1411	GAK	0.396150323348025
1412	RAD51C	0.395838013355934
1413	STK32C	0.395759222579173
1414	FUT8	0.395676432796155
1415	IGHMBP2	0.395502439375232
1416	GOLT1B	0.395369077911994
1417	AIMP1	0.395214157421137
1418	RAP2C	0.395182368816359
1419	RAC3	0.395116661042603
1420	POLR2I	0.394882845322844
1421	ADSL	0.394877667243981
1422	PAX8	0.39469964664311
1423	RRNAD1	0.394648146256766
1424	SERGEF	0.394548805873865
1425	RMDN3	0.394369920495186
1426	NUDT7	0.394364134225567
1427	RABEP2	0.394343142061191
1428	HSD17B14	0.394179869569622
1429	TMEM25	0.394085018350177
1430	PPP2R3A	0.393966790382211
1431	RFC1	0.393724974649747
1432	FTSJ1	0.393589290640059
1433	SEMA7A	0.393501980334702
1434	TFF3	0.39339257156052
1435	CSRP2BP	0.393373586627183
1436	SMOC2	0.393280282935455
1437	NCOA3	0.393198210025834
1438	MACROD1	0.393192722449518
1439	SH3GLB2	0.393187220549802
1440	C19orf24	0.393042484239381
1441	TIMELESS	0.392735947505659
1442	C1orf131	0.392661930963028
1443	AP001816.1	0.392436704608414
1444	BEST2	0.39242745930644
1445	SOX12	0.39232715360315
1446	STARD5	0.392325182364048
1447	DHX29	0.392315486928966
1448	TRPV4	0.392304698694295
1449	AP2A1	0.392128898656744
1450	WDR4	0.391939219279835
1451	PLXNA2	0.391910563999498
1452	UACA	0.391860378119345
1453	PHYHIP	0.391628006497303
1454	ATXN7L2	0.391540616741842
1455	MXD4	0.391496753428864
1456	HDAC8	0.391316510539197
1457	UBALD2	0.391059258784276
1458	SDR39U1	0.391019817670472
1459	TCN2	0.391005434902508
1460	ARHGEF10	0.390981350012041
1461	UPRT	0.390769023750252
1462	GTF3C3	0.390765117514095
1463	ACYP1	0.390620273220934
1464	GLCE	0.390535766117636
1465	CACNB3	0.389944779346534
1466	MAPKBP1	0.389836212229711
1467	TCF25	0.389752856805112
1468	TBC1D12	0.38972941063221
1469	PLEKHM2	0.389695139711729
1470	RNASEH2B	0.38956550400196
1471	NFIB	0.389463608095645
1472	HIVEP3	0.38944924952973
1473	TEX2	0.389323087607327
1474	MACROD2	0.389292678603085
1475	NUDCD1	0.389276416698134
1476	MYCT1	0.389255678662932
1477	PNP	0.389153759568685
1478	SNRNP25	0.389053345147268
1479	SPG20	0.38886595751059
1480	PPP1R21	0.388808098122303
1481	EPCAM	0.388798162175757
1482	WASF3	0.388778432748582
1483	PQBP1	0.38828948947622
1484	NTMT1	0.388263404285428
1485	OPLAH	0.388193635527695
1486	OTX1	0.388183569271824
1487	UBR4	0.388119470405508
1488	PALMD	0.388086206074813
1489	FDXR	0.387977239149172
1490	LETMD1	0.387754975054725
1491	POLL	0.387737048514489
1492	TPRN	0.387646787698646
1493	COBLL1	0.387544497413762
1494	C2orf88	0.387512228762732
1495	HN1L	0.387436736855716
1496	NECAB3	0.386877030181062
1497	PTBP3	0.386433316062703
1498	PRMT2	0.386372407307955
1499	HIVEP2	0.386327007352142
1500	TACC3	0.385420272252053
1501	TTLL5	0.385389997283009
1502	ACN9	0.385320621591614
1503	CCDC88C	0.385218480552968
1504	TRAPPC1	0.385142331269289
1505	FANCL	0.385056603287256
1506	C17orf75	0.385042449959632
1507	SPATA13	0.384878804898295
1508	STX6	0.384723305218401
1509	CRNKL1	0.384652524577736
1510	ZNF512	0.384504623653942
1511	ROM1	0.384282920888538
1512	PGF	0.384122961308349
1513	MROH6	0.384071711481908
1514	FKBP2	0.384056457042041
1515	PVR	0.384027400197257
1516	NAA30	0.383942134861415
1517	ZHX1	0.38345282915329
1518	OXNAD1	0.383428102121387
1519	ZNF574	0.383388698329977
1520	RHOC	0.383137959730639
1521	BAZ1A	0.382976642128562
1522	ERC1	0.382949797087644
1523	SMC1A	0.382804099921978
1524	LDOC1	0.38276227699025
1525	CCDC132	0.382669046451524
1526	PCSK2	0.382628366021431
1527	MRPL19	0.382308986094642
1528	SLC15A4	0.382219955016579
1529	TRAPPC13	0.382197660728996
1530	DUSP10	0.382125986447782
1531	HEATR1	0.38212048235266
1532	TBC1D10A	0.382049317806544
1533	ACLY	0.381899926244746
1534	ZFP62	0.381758835792762
1535	UBXN11	0.381616022470101
1536	PUM2	0.381557063705411
1537	NDUFAF5	0.381283335970476
1538	TDRD10	0.381174213542044
1539	GNPAT	0.381032531325011
1540	YKT6	0.380882963562162
1541	CTR9	0.380855716258395
1542	CDK18	0.380642480221426
1543	RND3	0.380532047019808
1544	JAG2	0.380447765696269
1545	MAOA	0.380370313494281
1546	CD14	0.380291343065294
1547	NOC4L	0.380242314305634
1548	ABCC3	0.380067734624939
1549	ACTR8	0.380020937612725
1550	PTGES2	0.379845097402902
1551	ATN1	0.379796748604767
1552	MED16	0.379726598733144
1553	ABCB7	0.379698200304518
1554	PRKCB	0.379618282786516
1555	UBE4B	0.379565841053127
1556	TMEM132A	0.379514879168869
1557	ESPL1	0.379291332042488
1558	SNX16	0.378815461157869
1559	PTPN3	0.378537324667528
1560	CLYBL	0.378507275878194
1561	KCNK1	0.378368731036944
1562	WRN	0.378358739714324
1563	LAS1L	0.378210392675118
1564	ATL1	0.378143188231818
1565	ZNF205	0.37813812841346
1566	BCAN	0.378079257408069
1567	AHCYL2	0.377862185536557
1568	SLBP	0.377770824659249
1569	SHMT2	0.377744344764985
1570	UCP2	0.377502543957566
1571	MBD2	0.377377272951308
1572	MAPK8	0.377104725983254
1573	GRAMD3	0.376872378976884
1574	ZNF444	0.376625780687181
1575	LAT	0.3764914973849
1576	TOMM40L	0.376295425352726
1577	BIRC2	0.376293782387215
1578	MMP17	0.37621189898288
1579	MTMR11	0.376059600361797
1580	AVL9	0.375963534721837
1581	IRF7	0.375935784215878
1582	SLC45A4	0.375719080583872
1583	ZNF274	0.375645967453441
1584	ATAT1	0.375637154664093
1585	ZNF446	0.375593857852383
1586	CEPT1	0.375573338075103
1587	CENPJ	0.375052356429796
1588	PPP1R37	0.374966123904532
1589	UBR7	0.37480491864097
1590	FAM214B	0.374708187259302
1591	HOXC9	0.374665336510327
1592	MTFR1	0.37465778715946
1593	MCF2L	0.374600193953649
1594	ACOX2	0.374587306782985
1595	ALDH16A1	0.374545242876684
1596	KIAA0556	0.374366396901562
1597	ZDHHC18	0.374118017304693
1598	LCAT	0.373964863317022
1599	ADORA3	0.373898673182367
1600	TPP2	0.373861937388021
1601	SARS	0.373731350606447
1602	FRY	0.373374701434166
1603	FAM13A	0.372966404674294
1604	DIMT1	0.372942469038388
1605	POLR1B	0.372901788185324
1606	PEAR1	0.372662265959523
1607	CDKN2C	0.372437987857208
1608	WARS2	0.372383367199919
1609	PTPN23	0.372272267689407
1610	RWDD3	0.372242818694818
1611	BAIAP2	0.372138702030212
1612	SLC26A10	0.372067745237848
1613	USP45	0.372031117043153
1614	CCNE1	0.371794983568557
1615	SETD9	0.37175869394652
1616	TRAPPC6B	0.371509928532212
1617	SCFD1	0.371339471033106
1618	CCDC61	0.371068739301616
1619	CYP1A1	0.370981134056214
1620	SH2D4A	0.370839210264133
1621	ESRP1	0.370832402256067
1622	PRPF40A	0.370815716755481
1623	GCA	0.370708793969878
1624	SF3B2	0.370575760424605
1625	AIF1L	0.370528285786282
1626	ROBO4	0.370467523935256
1627	HSF1	0.370401977791154
1628	TRABD	0.369804551316185
1629	TSTD2	0.369697988394531
1630	TDRD3	0.369651607112192
1631	C11orf35	0.369459417722308
1632	AQPEP	0.369297239572706
1633	GSTT1	0.369133661729297
1634	KANSL1L	0.369034086653665
1635	GATM	0.369026212311048
1636	ZSCAN9	0.368916868115921
1637	TTC32	0.36887450306306
1638	WDR26	0.368828890949319
1639	MLEC	0.368582525760066
1640	HOXB3	0.368468180455329
1641	TC2N	0.368435856347211
1642	WDR47	0.36833446764235
1643	FMR1	0.3682022031216
1644	C15orf41	0.36818957478066
1645	ILF3	0.367932579628514
1646	VRK2	0.367775633571767
1647	ANLN	0.367617785122958
1648	MAGED2	0.367523296235638
1649	SMARCA4	0.367465818505963
1650	PCCA	0.367426162558073
1651	THNSL2	0.367291711100476
1652	RRP1B	0.367226150432719
1653	TMX3	0.367191660124835
1654	SGCE	0.367074873984812
1655	GRAMD4	0.367020198119288
1656	AMMECR1	0.367002156721783
1657	KRR1	0.36689537663406
1658	NOL6	0.366866466553123
1659	MICU1	0.366841769758838
1660	CORO1B	0.366775673980308
1661	CHD1	0.366495829720757
1662	CCDC82	0.36630450349344
1663	CCNF	0.36616077986368
1664	TCP11L1	0.366136100361097
1665	ANKHD1	0.365914897365871
1666	GPATCH2L	0.365688977562142
1667	PSMC4	0.365677220548384
1668	C6orf106	0.365580631843342
1669	PGAP3	0.365272337702041
1670	ATG4B	0.365141508923063
1671	CCM2	0.365121672139851
1672	SOCS2	0.364994827727702
1673	ZBTB48	0.364627322044717
1674	RIC8B	0.364546772183125
1675	TRNP1	0.364501101065832
1676	FBXO8	0.364399231852482
1677	PRR14L	0.36427743431221
1678	HDHD2	0.364205990698686
1679	NAGA	0.364036983041559
1680	PPP4C	0.36395921087364
1681	ELP5	0.363893530377902
1682	CCDC109B	0.36384779436453
1683	ZC3H7B	0.363827842297652
1684	THUMPD2	0.363811111396789
1685	DOK4	0.363721441232671
1686	ST5	0.363630295850089
1687	RECQL4	0.363323021816325
1688	ING1	0.363273359527615
1689	GDE1	0.363229972188096
1690	MTF2	0.363197143157231
1691	ABHD16A	0.363186282657225
1692	ARHGEF25	0.363140456112267
1693	AAGAB	0.363101345594149
1694	DCTPP1	0.363017465744949
1695	PLXND1	0.363010368003334
1696	MTERFD1	0.362997690076915
1697	ZNF276	0.362916174376685
1698	DDIT3	0.362872807240339
1699	DPYSL3	0.362871359578516
1700	ATG16L2	0.362837029159372
1701	KDM4C	0.362763089373955
1702	CAST	0.36275056567612
1703	R3HDM1	0.362642278477355
1704	IGFLR1	0.362548205692639
1705	KIAA1324	0.362534689917832
1706	CHMP7	0.362458725856904
1707	STX3	0.362291253505206
1708	ZGPAT	0.36228704709699
1709	TPD52	0.362212233945888
1710	CEP89	0.362187125625291
1711	EPB41L2	0.362109171088574
1712	ZZEF1	0.361854921256644
1713	CLDN15	0.361830769096946
1714	MMS19	0.361586386359096
1715	ZNF185	0.361534866751524
1716	ETV7	0.361495519568039
1717	ARHGEF3	0.361455869537218
1718	HMG20B	0.360911380575039
1719	SLITRK4	0.360869273312678
1720	CCDC107	0.360547105030938
1721	ACACA	0.360544983629141
1722	RIN1	0.360291827972099
1723	RTN1	0.360154632590585
1724	MFSD6	0.360134868116598
1725	ICA1	0.359835461518872
1726	RANBP9	0.359451707526847
1727	EMCN	0.359329190272574
1728	PPP1R13B	0.359036143650349
1729	ANGPTL1	0.359005806516634
1730	TK2	0.358742458646561
1731	IFT27	0.358684795570984
1732	TECPR2	0.358494929919043
1733	PTPN13	0.358167130408962
1734	SLC43A3	0.358156238119559
1735	FMNL1	0.358086354284148
1736	RALGAPB	0.358003051447409
1737	GLB1	0.357678537616498
1738	ARHGEF9	0.357610012614831
1739	WWC3	0.357525296230584
1740	KANK3	0.357314378902237
1741	PHF8	0.357283944843182
1742	AGFG1	0.357089334680642
1743	ARHGAP30	0.357086522804696
1744	TMEM260	0.356885530958673
1745	APOD	0.356871938851113
1746	KRT79	0.356785751106116
1747	FIP1L1	0.35678203544451
1748	BZW2	0.356758055914968
1749	MINA	0.356738392766874
1750	ABCC1	0.356549610390805
1751	DNAJB12	0.356224279648021
1752	SNX2	0.356166621738744
1753	ATG9A	0.356147015968799
1754	SYNE1	0.356127949532226
1755	JKAMP	0.356053443589226
1756	USP20	0.356044474101698
1757	C15orf38	0.355808841872476
1758	EIF2AK3	0.355747359080959
1759	BTBD2	0.355698490403006
1760	MFSD12	0.355563069606279
1761	TMEM218	0.355440670524723
1762	PMM1	0.355195909894471
1763	PEX3	0.355091559732739
1764	LYSMD4	0.354981380527615
1765	TET2	0.354915614811569
1766	ZNF24	0.354900102047748
1767	AMACR	0.354899220692617
1768	TMEM8B	0.354678746373172
1769	ANXA1	0.354622275791833
1770	SMIM4	0.354620410216748
1771	HSPBP1	0.35450632666893
1772	ARAP1	0.35450481523036
1773	DOCK4	0.354458458862606
1774	KIAA1407	0.354423220329934
1775	PUF60	0.35438573002386
1776	PKN2	0.354286377827344
1777	RAB24	0.354111475157518
1778	ZNF142	0.354075370638764
1779	PADI1	0.35400248185029
1780	CELSR1	0.353878881274936
1781	STC2	0.353800112210808
1782	ATP13A2	0.353566195120305
1783	LRMP	0.353432313862132
1784	KLHDC8B	0.353425825581355
1785	NID2	0.353225832204003
1786	FAF1	0.353224333969624
1787	MPP7	0.352959317155048
1788	DDX26B	0.352947898471459
1789	MAT1A	0.352791878172589
1790	GIMAP5	0.352529077364094
1791	ARFRP1	0.352463526111476
1792	ARL15	0.351896744854797
1793	GAREM	0.351636678722391
1794	SH3BP5L	0.351542167246043
1795	BCHE	0.351459439315851
1796	POLD1	0.351459073577654
1797	ACAP3	0.35140699719754
1798	ZSCAN18	0.351363744438029
1799	ZBTB21	0.351355394684195
1800	BTBD3	0.351335079122906
1801	GPR146	0.351113016891768
1802	RAPGEF2	0.351011479557252
1803	CCS	0.350934004778695
1804	GTF3C5	0.350895137177087
1805	CCDC34	0.350830997155193
1806	MTSS1L	0.350807596342563
1807	PTPRM	0.35079715006324
1808	REPS1	0.350618428642655
1809	GJB6	0.35048210214874
1810	PLCD1	0.350365381941785
1811	ARNTL	0.350334366718504
1812	ERCC6L2	0.350291634008503
1813	TBX3	0.350164359979742
1814	TRADD	0.350138202167888
1815	ATP13A4	0.349924237304367
1816	BIRC3	0.349885127968584
1817	SAMD4A	0.349875355174517
1818	RIPK2	0.349830714950527
1819	ECM1	0.349700243034576
1820	CYP19A1	0.349699652406151
1821	MOSPD1	0.34950094861008
1822	RBM42	0.3494728882941
1823	DNMT1	0.349393058251666
1824	SLC12A4	0.349214544721303
1825	MAEA	0.349073605740707
1826	ZNF385D	0.348995069015815
1827	GPR143	0.348900599672906
1828	RNF149	0.348852410032308
1829	VILL	0.348820400932588
1830	TRIP6	0.348568843580066
1831	LOX	0.348524169995508
1832	MANBA	0.348494972975565
1833	ZMYND8	0.348462690861305
1834	SPG11	0.348378465737681
1835	PRIM1	0.348043613805238
1836	USP46	0.347973290209898
1837	PITPNC1	0.347908497159866
1838	CPSF7	0.347824523391037
1839	AGER	0.347805608880401
1840	KDM3B	0.347661242648317
1841	ACOT7	0.347608109419038
1842	RNF121	0.347581207364023
1843	BCOR	0.347567697571292
1844	TSPAN9	0.34740791850958
1845	C18orf21	0.347259725779294
1846	SLC46A3	0.347255543078499
1847	TTC31	0.347239248228524
1848	NCALD	0.347035840292385
1849	TGM1	0.346820809248555
1850	NPL	0.346661824092634
1851	COPS7A	0.346480593601335
1852	BYSL	0.346244615999807
1853	PPP1R32	0.346111430537359
1854	NINL	0.346087259013697
1855	FAM49A	0.346074107494055
1856	FBXO18	0.346074040295512
1857	TUBGCP6	0.345945034081391
1858	GRB14	0.345824723384765
1859	SLC29A2	0.345803285090606
1860	TARSL2	0.345784547999108
1861	CCDC102A	0.345687823424949
1862	BCAR3	0.345419355546174
1863	WDR60	0.345402235820399
1864	LRP6	0.34520370170099
1865	MYBPC1	0.345176461120743
1866	NT5DC1	0.345163549775771
1867	SC5D	0.344915921998274
1868	ZNF133	0.344867091499949
1869	RASAL2	0.344738585259287
1870	SLC9A6	0.344443918856714
1871	CSK	0.344035670606191
1872	AP006621.5	0.343831611720508
1873	FOXRED1	0.343504158674194
1874	DYRK1A	0.343357448494102
1875	RFX2	0.343288762845704
1876	HOXA3	0.343260319250423
1877	IFNGR2	0.343245354667089
1878	LRRC14	0.343211296036605
1879	FANCI	0.343120047013127
1880	WRB	0.343061774808603
1881	TMEM9B	0.343046546795048
1882	ZNF189	0.342963519819646
1883	ZNF330	0.342937424705991
1884	WDR25	0.342691367717033
1885	GPSM1	0.342637571430316
1886	STK39	0.342633291827117
1887	RTTN	0.34259449126864
1888	PDK3	0.342575702298431
1889	CCDC149	0.342555049265919
1890	PTAR1	0.342495609356751
1891	VCAN	0.34238223664948
1892	TBCE	0.342282427139863
1893	APRT	0.34225033681202
1894	TBC1D25	0.342181674829811
1895	EDNRB	0.342070837322309
1896	PRC1	0.342017079219839
1897	TJP1	0.341935519126503
1898	SIKE1	0.341868342728183
1899	ATF7IP	0.341856156476839
1900	IQCK	0.341838338317641
1901	C1orf123	0.34158830475456
1902	CADM3	0.341481707997405
1903	COPS3	0.341374089202778
1904	PDZD7	0.34136546184739
1905	RNF214	0.341310048243386
1906	OGFOD2	0.341213252674595
1907	TLE4	0.340913808136337
1908	HELQ	0.340842981805738
1909	TNNT2	0.340783278582718
1910	SLC5A6	0.340698982011998
1911	SEPT9	0.340515689241251
1912	SSH1	0.340434615548819
1913	C5orf38	0.340429914804589
1914	YIPF1	0.340126662747074
1915	PLBD1	0.340030477604982
1916	WBSCR22	0.339587115589023
1917	STK16	0.339515203871681
1918	PARP10	0.339425336758364
1919	HAUS4	0.339349372063564
1920	BRAP	0.339261603155745
1921	GPC2	0.339236519370725
1922	BBS4	0.339220674403883
1923	GDPD5	0.33915414627086
1924	SLC35C2	0.33905157239714
1925	HSPB7	0.339048521884351
1926	SNRNP40	0.338901830265265
1927	TSTD1	0.338419505670408
1928	ESYT1	0.337991782983144
1929	JAM3	0.33797712933799
1930	SLC6A6	0.337746878459028
1931	AGL	0.337667461166908
1932	NLE1	0.337559596661909
1933	TGFBR2	0.337517730219917
1934	PARD3	0.337464484506814
1935	APBB1	0.337407256162978
1936	RORA	0.337282179197929
1937	MIEN1	0.337175792507205
1938	EVL	0.337150659153592
1939	TNNI3	0.337150152459272
1940	NAA25	0.337101536372577
1941	INTS1	0.337019389465502
1942	UBP1	0.336997325635502
1943	NR2C1	0.336975576561375
1944	OSBPL3	0.336953260608394
1945	CHAMP1	0.336941165846625
1946	PPP2R1B	0.336778744930146
1947	RFTN1	0.33657117769978
1948	ST6GALNAC4	0.336568508544779
1949	RHBDL1	0.336296921122532
1950	EXOC6	0.336282395676319
1951	C1orf52	0.336251550206445
1952	CNR1	0.336176923062011
1953	ENOX2	0.336156860843893
1954	SLAIN2	0.336130703933081
1955	NGLY1	0.336129018489608
1956	NT5E	0.335798568534571
1957	AP1B1	0.335556384113917
1958	NUP98	0.335413298438945
1959	WNT11	0.335358958702777
1960	XRN1	0.335353564750478
1961	HTATIP2	0.33531434881465
1962	ABCA2	0.335308456931703
1963	NOVA1	0.335296884108227
1964	MRPL22	0.335064294278509
1965	ACD	0.334797018065958
1966	ELMO3	0.33475154122372
1967	CNST	0.334700875624235
1968	CMC1	0.334695445732077
1969	INPP4A	0.334678930065908
1970	ANGPTL2	0.334663723550897
1971	CTNNBL1	0.334336291366696
1972	CAMSAP2	0.33429682830799
1973	TMCO3	0.33410640432697
1974	RELT	0.333894428798264
1975	CHST14	0.333894022684976
1976	MTA3	0.333819292234777
1977	PDGFRA	0.33362748904113
1978	WHSC1	0.333584456302681
1979	PET112	0.333570239668041
1980	IQSEC2	0.333487512840622
1981	EVA1A	0.333209094077671
1982	MTMR3	0.333193846593386
1983	PIAS4	0.33317576963851
1984	FAP	0.33299163469135
1985	VARS2	0.332817414526967
1986	EIF2A	0.332759073830864
1987	RPA3	0.332729526065757
1988	NFATC4	0.332669589242412
1989	CACHD1	0.332620195956209
1990	ECSCR	0.332511190355513
1991	TSEN54	0.332476829039728
1992	ZSCAN25	0.332463639636421
1993	WDR81	0.332171616114188
1994	MALT1	0.332073789559944
1995	ZBTB17	0.331785188113119
1996	STPG1	0.331531729844904
1997	WDR46	0.331488058007638
1998	AMIGO2	0.331375874228326
1999	KIAA0100	0.331345426034401
[truncated: 5,192 more rows]

## Sheet: Group2 (TE-TE) 
rank	hub	r
1	KIAA1239	0.974646134702131
2	TTC36	0.956301456618113
3	GLIS1	0.926384364820847
4	SLAMF9	0.912570108874959
5	THSD7A	0.89637864327344
6	GRIK5	0.892632450135639
7	GLYAT	0.891815043690849
8	CCDC85A	0.886365695411757
9	LRRN4	0.882718944899907
10	DCSTAMP	0.873061471031107
11	CD2AP	0.87196814719917
12	SPSB4	0.869447293616342
13	SERTM1	0.868211666926688
14	KANK4	0.866198313347418
15	CTTNBP2NL	0.862137478217966
16	CRYBB1	0.857637986309678
17	HEPACAM	0.857515392911864
18	EVC2	0.856076013714576
19	ADAMTS3	0.854074736653452
20	ZNF792	0.853939657413353
21	FGF16	0.85176798467166
22	ASPHD1	0.851637750596863
23	C1orf172	0.847633805755543
24	CBLC	0.845477481988591
25	SMPDL3B	0.843330688272291
26	THAP2	0.841885599626826
27	HMCN2	0.839374359025876
28	CNNM2	0.839363079226341
29	GRHL2	0.837831956514181
30	AP1M2	0.83667702570754
31	TPD52	0.833719155890599
32	LRCH1	0.83316748833318
33	ANKRD53	0.832452984347557
34	ELFN1	0.832393114555257
35	ABCD2	0.831124937087777
36	RUNDC3B	0.829552044481637
37	FZD6	0.82833084148505
38	CD200R1	0.828155373119411
39	AZI2	0.823826258801239
40	FCN2	0.818389817353447
41	CITED1	0.816401839267474
42	ADAMTS18	0.813534917206623
43	KIAA1244	0.813248706951887
44	ARNT	0.810889398875667
45	ZNF275	0.809959182576257
46	PTK2	0.80926811529453
47	ZBTB46	0.809010994065385
48	SLC16A7	0.807542953359697
49	NAT8L	0.807244625859829
50	PPP1R13B	0.806542292805062
51	NPY2R	0.801236588470631
52	DMRT2	0.800997386042005
53	WNT2	0.800811444902754
54	PPFIA3	0.800663214824439
55	CDC42BPG	0.800114690447522
56	ACVR1C	0.79949505575426
57	CCDC68	0.799412288802124
58	NUDCD1	0.795775238473178
59	GALNT13	0.793825365922767
60	FGD1	0.793778591033852
61	FOXD3	0.792793327802484
62	C1orf213	0.792530575011512
63	TMEM151A	0.789014420868926
64	CACNG4	0.788826697615065
65	SLC27A2	0.787755485598102
66	PTPRK	0.786948680685658
67	CYB5D1	0.785401149088693
68	HOOK1	0.785048540633054
69	CDK5RAP1	0.782770145854066
70	FGF12	0.781812270334181
71	MAPK10	0.781449757281107
72	RHOV	0.78029906692184
73	MISP	0.77797857306391
74	TMEM26	0.77770784285771
75	ACSS3	0.777286007632516
76	RABGAP1	0.777234732024075
77	SERPINA11	0.77585886722377
78	EHF	0.774342625840835
79	ORMDL3	0.773875834145581
80	SDK1	0.772980669671191
81	PRSS36	0.771205471383406
82	MESP1	0.770450814651943
83	ZDHHC6	0.770418760325435
84	CPNE6	0.770043892997138
85	CACNA1G	0.769844175322123
86	GFRA2	0.769714647115845
87	N4BP3	0.76900759354277
88	ST6GALNAC5	0.768638119299605
89	GLI3	0.765948528245068
90	NTSR2	0.765774199588092
91	CAMSAP3	0.765640523104299
92	PEX19	0.765393748037254
93	PI15	0.764767895297891
94	ZNF609	0.764701032328134
95	MYB	0.764439003697736
96	GYS2	0.764208484281406
97	RPRM	0.76341125312953
98	TENM3	0.763072696178664
99	TUB	0.761798467645564
100	EGFL6	0.761442502386398
101	PRDM16	0.759668946400292
102	DRAM2	0.759652238299581
103	B3GNT3	0.759028317208093
104	SLC28A3	0.75868095526704
105	B4GALNT4	0.758279881923919
106	BAIAP2L1	0.757694104423456
107	STIM2	0.75763286845081
108	VASH2	0.756097591623579
109	ST6GALNAC1	0.755494831249135
110	NYNRIN	0.75528886442261
111	CD300LB	0.754197677298366
112	IL22RA1	0.754097616636237
113	NTS	0.753537851106034
114	IL17RC	0.752447000904588
115	PMM1	0.752013104591232
116	DNASE2B	0.751884555295455
117	DPYS	0.751278651259708
118	USP48	0.74948119883542
119	KLK1	0.749326405577575
120	CRMP1	0.746327435993372
121	PDZD3	0.745456275573318
122	TTC7A	0.744474914593947
123	NAT1	0.744469752213152
124	CEPT1	0.743740865572198
125	ITIH1	0.743533175891991
126	DERL1	0.743206097255633
127	CRHBP	0.742583913178579
128	NAGS	0.740027714323075
129	BACE2	0.739247787377495
130	FRMD3	0.738879647714106
131	ALG6	0.738314147528624
132	WDR48	0.738034476289273
133	STAB2	0.737429625861115
134	COL6A6	0.737422046246872
135	CRB2	0.735832773995589
136	ARTN	0.735511817271887
137	KCNA4	0.735226400613968
138	VSNL1	0.734738704208742
139	KNDC1	0.734691416790675
140	MATN3	0.733880235371761
141	RAB11FIP4	0.732905928046858
142	KL	0.732884107663767
143	CDS1	0.732124341689368
144	FOXA1	0.7314275662104
145	ATP13A2	0.731385828534261
146	CNKSR1	0.730822716435335
147	RELL1	0.729940225481561
148	NUDT8	0.72927874455976
149	ASTN1	0.728472858097176
150	FERMT1	0.726967916271353
151	IL17RB	0.726662841370628
152	SLC4A4	0.725765347019326
153	KCNA1	0.724458204334365
154	TIAM1	0.724415690908944
155	KCTD8	0.723099273607748
156	GATAD2B	0.722618090325801
157	TRH	0.722480620155039
158	PFKFB1	0.722397713325173
159	BIK	0.721169953979756
160	WHSC1L1	0.720146488181992
161	SPATA6	0.720035273975841
162	TFAP2C	0.718309669649104
163	AOC2	0.717700990148413
164	ERCC5	0.717075493772243
165	PRSS16	0.71674614454349
166	CRLS1	0.716371703562441
167	DACT2	0.715472254596784
168	SESTD1	0.715348893376595
169	ZNF385D	0.715117406808564
170	CCRL2	0.713929100970809
171	RBFOX2	0.713027240368626
172	ANGPT4	0.711938013349543
173	ELOVL2	0.711680650756916
174	TBC1D9	0.711665902994493
175	B3GALTL	0.71126755011119
176	RWDD3	0.708472484131523
177	CCDC178	0.708386941305675
178	TRABD2B	0.708344778881202
179	PVRL4	0.707929477404444
180	CCDC88A	0.707360481795784
181	TM6SF1	0.707309178554416
182	MED23	0.707029464159034
183	TFAP2B	0.706961465967266
184	CTD-3193O13.9	0.706734405751939
185	PPM1H	0.706197462472596
186	USP13	0.704945631845251
187	ABCG2	0.702279357867381
188	DLK1	0.702135556358708
189	PGR	0.701787924160959
190	IFITM10	0.701706821852161
191	TNK1	0.701391539022821
192	TMC4	0.701157286386919
193	MUCL1	0.700747833913108
194	NCEH1	0.700465262348369
195	DNAJC27	0.699289660615627
196	ZDHHC7	0.698762824828619
197	FAM83H	0.698326887183544
198	BNC1	0.69832087264128
199	KIF12	0.698077222862489
200	FOXL1	0.698043753496427
201	KIAA1211L	0.697895625340666
202	NHSL1	0.696946062266369
203	PRAF2	0.696649955525618
204	FANCL	0.695596380820622
205	CD70	0.695536799500155
206	RABEP1	0.695406081815739
207	ARHGEF7	0.695306660071836
208	KRTCAP3	0.695193236426575
209	IQCA1	0.695032696051587
210	GLMN	0.694564937637151
211	KMO	0.693895486207436
212	PRRG3	0.693713460009211
213	ZNF697	0.692830859220259
214	CEP164	0.692826709185202
215	ATP7B	0.691154571627122
216	RNF180	0.690907969036967
217	GRAMD2	0.690870099036333
218	MMP24	0.690243481539279
219	PNLIPRP1	0.689724392267538
220	NINJ2	0.689667490227049
221	PREX2	0.689368179113988
222	BARX2	0.689362851537076
223	SCRN2	0.689330927117089
224	TP53BP1	0.688778674482747
225	RHOXF1	0.688681121941516
226	GLI2	0.688067667150597
227	PYROXD2	0.687502505515905
228	GALNT9	0.687313885576332
229	SYNE3	0.686965366408702
230	TREML2	0.686754074229913
231	GLA	0.686602515207293
232	INS	0.686463855545702
233	TTLL10	0.686438239871769
234	AKT3	0.686302071435911
235	RAB6B	0.686049184385167
236	TCF7L2	0.686049035083683
237	PIP	0.685817383590684
238	AK5	0.685738355468697
239	ABCD4	0.685615612205067
240	SNX14	0.685567751159255
241	PARD3	0.684671213082341
242	SUFU	0.68335382638861
243	DNMBP	0.682992483867535
244	ACACA	0.682323557349754
245	CLDN15	0.68179027426509
246	TPO	0.681167126371516
247	ZNF512	0.680943169266994
248	LRP2	0.680788503711236
249	BBOX1	0.680441052257163
250	FAM101A	0.679511109956439
251	REPS1	0.679460646555371
252	FBXO42	0.678266235304087
253	PAXBP1	0.678014280144668
254	CUX2	0.677923751128099
255	PTPN18	0.67722375229251
256	SGK223	0.676552803031786
257	CCDC81	0.67654561807719
258	NMNAT2	0.676445862282621
259	VPS36	0.676326371609439
260	FBXO31	0.67608293125947
261	EED	0.675683224789595
262	PIGV	0.674775973454339
263	IL20RA	0.674625847096649
264	IGSF9	0.674599395286426
265	TSPAN6	0.674433734090591
266	ANGPTL5	0.674169122209569
267	NENF	0.673556116800285
268	ABCC11	0.673156858128095
269	C19orf80	0.672868759623508
270	SORBS3	0.67283935782321
271	DOCK3	0.672696661177936
272	HTR2A	0.672463860983661
273	ADAMTS16	0.672067595030288
274	ETFA	0.672045631730452
275	LDLRAD4	0.671647851874998
276	ZNF25	0.671637279596977
277	PHF11	0.671572108336709
278	PCGF2	0.671074349163478
279	C17orf96	0.671010936075093
280	KALRN	0.670375504809832
281	CENPV	0.670347319815298
282	NAV1	0.670289127921486
283	BAALC	0.670250386787726
284	TMTC2	0.669497974519908
285	SERPINA6	0.669223781164833
286	THRB	0.669067317421582
287	ZNF496	0.668663063215707
288	CAPN13	0.668579368181431
289	MANBA	0.667715212764552
290	SIDT1	0.666370206290804
291	ESRP2	0.665587803978071
292	PPP2R5A	0.665469038232599
293	CLDN8	0.664159019904744
294	TPSG1	0.663732454713438
295	TRAF3	0.663306228674065
296	PKHD1L1	0.663095391668432
297	DNAH9	0.662539176617336
298	B3GNT9	0.662366467217524
299	TCF15	0.662309210634918
300	LRBA	0.661785282549905
301	ZFPM2	0.661514231058472
302	KCNK2	0.661360134965897
303	MAP7	0.661293381648162
304	TNFAIP1	0.661147408117432
305	VAV2	0.660988647228279
306	HAPLN2	0.660124159135937
307	ARHGEF9	0.659583036556204
308	C11orf52	0.65939936121467
309	PIEZO2	0.657468488513854
310	AMN	0.657165082560739
311	ZFHX4	0.656848343016321
312	TNRC6B	0.656202221995719
313	GGT7	0.656052019874193
314	RMDN3	0.656037334491049
315	SERINC2	0.655785137924319
316	CBX2	0.655530750895036
317	RORC	0.654938445423587
318	CMA1	0.654763777605454
319	TCEAL7	0.654739178620102
320	SLC1A1	0.654268752599621
321	LRCH2	0.654178234890671
322	TTC18	0.654163563792788
323	HECW2	0.65406688833993
324	SLC25A22	0.653790234209314
325	GABPB1	0.653718962166437
326	TNFRSF8	0.653024363264524
327	NOVA1	0.652232674663017
328	CSN1S1	0.65139116202946
329	REEP6	0.65091350161096
330	CBR4	0.65075751699834
331	PIK3C2G	0.650724969878434
332	TTC6	0.650699242048777
333	FAM47E-STBD1	0.650656333083464
334	C10orf90	0.650604811346933
335	JAM3	0.650420999793455
336	FBLN7	0.650369387292277
337	PLCH2	0.650331570089438
338	NEK10	0.650198687166087
339	GPR87	0.649851734977934
340	ABHD6	0.649738325916536
341	SLC39A6	0.649511331647882
342	ELMO3	0.648099048480732
343	CCDC64B	0.647997199682654
344	INSIG2	0.646013303994892
345	METTL24	0.645940170277163
346	DAGLA	0.645797422649897
347	ZFHX3	0.645597788641471
348	C20orf112	0.645401657863373
349	ASGR2	0.645101877702615
350	SLITRK4	0.645091053655961
351	LRRC42	0.645063298689044
352	CHSY3	0.645012867127608
353	CCDC39	0.644623337324877
354	MCF2L	0.644253780477783
355	RAPGEF2	0.643974876787884
356	RP5-966M1.6	0.643140496890371
357	ZHX2	0.642936125710935
358	MMP27	0.642762889110646
359	SRC	0.642605034240558
360	PDK3	0.642331897325958
361	DAB1	0.641707541929754
362	TMEM61	0.641323166241594
363	FAT1	0.641316406175634
364	NPY5R	0.641109679976221
365	TMEM132C	0.640999763187532
366	PPP2R2C	0.640862790133582
367	NCOR2	0.640561510704472
368	PGAP2	0.640468880129031
369	RSPO1	0.640121167813754
370	VNN3	0.640082487045625
371	HSPA12A	0.639894590218656
372	NLRP13	0.639702847709451
373	MBNL3	0.639491927533575
374	SPATA9	0.639060206071461
375	ZBTB18	0.638765560468207
376	ADA	0.638748049907966
377	QDPR	0.638594194216569
378	C12orf5	0.638290902971189
379	RP11-451M19.3	0.638232704941082
380	PRKACB	0.637765913349261
381	PRKCZ	0.637760088409291
382	SLC24A3	0.637629656853969
383	PLAGL1	0.637214821125009
384	RASL11B	0.637100021106364
385	PAPPA2	0.636987344225082
386	CCL8	0.636788694155968
387	ASIC1	0.636762063837153
388	TJP1	0.636755521942318
389	OVOL2	0.636693450765301
390	SPHK2	0.636628200193923
391	FBXO2	0.636359933303998
392	ATN1	0.636327153945396
393	NRXN3	0.636078085544828
394	PMP2	0.636068481841477
395	LDOC1	0.635686052836467
396	TMEM87B	0.635479196853654
397	PKIB	0.635373605570301
398	ARMC8	0.634983326852053
399	ANO9	0.634891322154584
400	ARHGAP40	0.633721118059891
401	UST	0.63306790250448
402	CADM2	0.63287502079028
403	GNAI1	0.632801477070038
404	CDC7	0.632664912274987
405	RNF182	0.632040688735584
406	NMB	0.631602465631884
407	APPL2	0.631052125119361
408	RCOR3	0.631007810728006
409	TIFA	0.630941524586237
410	KLRB1	0.63054742441738
411	SIX2	0.630321043510331
412	ADAP1	0.629626023095357
413	TSKS	0.629379353363136
414	HOXB8	0.629236847577459
415	RASL10B	0.629110354362665
416	KIAA0922	0.628971263664841
417	ARHGAP8	0.628707922771012
418	IKZF4	0.628368914091188
419	ARL15	0.627860925318802
420	ADPRM	0.627719305869179
421	PPP4R4	0.627524463876744
422	CYP2S1	0.627472632885497
423	HTR1B	0.627188810041785
424	RP11-1055B8.7	0.627143109015234
425	OLFM2	0.627000932242011
426	NAV2	0.62670663938657
427	EPB41L4B	0.626440607722057
428	RTTN	0.625767244231141
429	SEZ6L2	0.625142606675938
430	TLR8	0.625061469040493
431	MIS18BP1	0.624985554216222
432	GJB6	0.624764092309266
433	NCKIPSD	0.624694013890861
434	CHST8	0.624660963905696
435	MMS19	0.623611190156507
436	IDO1	0.623557173817756
437	PAN3	0.622589291379793
438	KDM5B	0.622452298569327
439	TFAP2A	0.622396124650683
440	TMEM51	0.622338801116057
441	LGALS2	0.62226426781081
442	LSAMP	0.622210226225737
443	ETNK1	0.622042245668107
444	PCNXL2	0.621602433795817
445	FGF9	0.621146256236476
446	MAP1B	0.620389936155098
447	RUNX1T1	0.62034205792867
448	GIPC2	0.619943202909256
449	MTUS1	0.619672527013296
450	PMEPA1	0.619258320009545
451	EFNB3	0.619127126518171
452	SLC35F3	0.619042631193045
453	PDGFA	0.618896038522027
454	TSPAN9	0.618331451992135
455	CA8	0.618280915986818
456	QARS	0.618278626170662
457	P2RY13	0.618086068023697
458	KRT77	0.618075775426929
459	RFX1	0.617797926666385
460	CNTD2	0.617791013815133
461	CPNE8	0.617542003707423
462	NDP	0.617335799286342
463	PHOSPHO1	0.616918563026182
464	CUTC	0.616835002703645
465	ENTPD2	0.615966755761967
466	ZNF248	0.615090898787318
467	PCDH7	0.615045303079272
468	LPAR2	0.614933502962499
469	ITGB7	0.61485272670037
470	NTHL1	0.614821359124358
471	IL12RB2	0.61445600649746
472	DCUN1D4	0.614175949427447
473	EDIL3	0.613964953057079
474	SDR42E1	0.613378207824989
475	CGN	0.61308951898801
476	DENND4C	0.612900769822133
477	HS3ST6	0.612846655326752
478	DMAP1	0.61283574229615
479	ABRACL	0.612769705873404
480	HSDL2	0.612671107431999
481	KIAA1217	0.612415071791915
482	HIVEP3	0.612190154488103
483	ABCB1	0.611650277540513
484	ITIH4	0.610983190405095
485	SLC35C1	0.610898922206568
486	ZNF460	0.610805778971684
487	CABP1	0.610757776824288
488	AC131097.4	0.610642943183691
489	DHDDS	0.610606334501868
490	FAM173B	0.609962689043867
491	GPR64	0.609806425188529
492	ZNF263	0.609682404724753
493	TMEM237	0.609642320785592
494	SRCRB4D	0.609502987405549
495	SCN4A	0.609110005179822
496	C2orf66	0.608989238235915
497	SOSTDC1	0.60883677768692
498	TSPAN15	0.60857139709789
499	CYP4X1	0.608368749684335
500	TMEM37	0.60805851229453
501	CD180	0.607901947615233
502	CADM4	0.607891808982347
503	EPHX2	0.607662833601988
504	MMP17	0.607602045286322
505	ANKRD13B	0.607477093710151
506	VAV3	0.607045356834817
507	VGLL1	0.606684170513758
508	CADPS2	0.606664140243789
509	MAMSTR	0.606583642940853
510	ARHGEF3	0.606476421999259
511	LRRC17	0.606400876396958
512	RGS18	0.605657431193033
513	TAB1	0.605592340129965
514	FAM110C	0.605224738836419
515	CACNA1D	0.604983250391333
516	BCAS1	0.604945159706766
517	CBFA2T3	0.604583465975379
518	FAXC	0.604454158129867
519	STARD3	0.604407273424143
520	PIP4K2A	0.604324582947121
521	IL20	0.604292458293744
522	KCNJ2	0.603869266688586
523	ITGB6	0.603718885744985
524	KLK8	0.603546617871861
525	PLEKHG6	0.603473755232505
526	PCDH9	0.603230332462097
527	ENPEP	0.603002243105185
528	TMEM200A	0.602963273766342
529	PJA1	0.602835661750996
530	C9orf3	0.602376510475515
531	BCHE	0.60227760933349
532	KCTD3	0.602212535277093
533	GORASP1	0.60215438630262
534	GPR126	0.602128569392312
535	TMEM74B	0.602124586811815
536	IFNG	0.601838415859267
537	TRIM27	0.601724038121566
538	ADM5	0.601662888199265
539	ARHGDIG	0.601486095849186
540	EDN1	0.601339588010889
541	PRSS22	0.601324712071112
542	TTC28	0.601316855115936
543	MYO7B	0.601126289445017
544	RASGRP1	0.601028620457032
545	C2orf82	0.601016166801104
546	CPXM1	0.600783591209701
547	PTGER4	0.600771501287186
548	ST6GALNAC3	0.600761831083621
549	CAPN7	0.600526084122246
550	PCM1	0.600426598177786
551	GATA3	0.600331264670647
552	GPBP1	0.600270699222054
553	MARK1	0.600156187972756
554	GAL3ST2	0.600127415587174
555	FJX1	0.599950212049395
556	C11orf53	0.599929146370425
557	SLC39A11	0.599815079971642
558	IL1RL2	0.599729160275889
559	DDX26B	0.599680820089782
560	ELMSAN1	0.59962978699288
561	PEX1	0.599286803939876
562	DHRS11	0.599243571754156
563	ESR1	0.598901367172784
564	CYP2R1	0.598738982067726
565	THUMPD2	0.598470939189218
566	ERMARD	0.598172769896272
567	WDR54	0.5976626280546
568	REPIN1	0.597659549665993
569	MCOLN3	0.597134359051533
570	ADRA2A	0.597076905537157
571	FAM110B	0.597060563979733
572	PRTFDC1	0.596872231532127
573	PRKAR1B	0.596786950431892
574	MDN1	0.596769771636737
575	NINL	0.596476600608945
576	TMEM184A	0.596309716146463
577	ASB13	0.596282900996022
578	EDEM2	0.596072481928466
579	HYI	0.595809454436387
580	NRSN2	0.595779125939313
581	MPP6	0.595173836704156
582	ARHGAP6	0.595077930323785
583	TMPRSS5	0.594816632285666
584	MAPK15	0.59457609942349
585	GLRA3	0.594456289978678
586	SLC46A3	0.593891684701928
587	KCNQ3	0.593708668780946
588	ATP6V0E2	0.593028159022577
589	PDE3B	0.592906801780518
590	NKD2	0.592506757441751
591	FZD10	0.592454219627859
592	TFPI2	0.592397608760793
593	ARMC7	0.592321468397522
594	SGCE	0.592294143909544
595	LRRN1	0.592285655075745
596	TNFSF13B	0.592067957559365
597	NFE2L2	0.591670179986128
598	GATA5	0.591656109234234
599	MANEA	0.591443769392705
600	ERMP1	0.590873137695276
601	PROX1	0.590761696483625
602	LRP1B	0.590569744352059
603	GALNT18	0.590292791580235
604	B3GALT5	0.589531234751976
605	GPR173	0.589516330807984
606	FAM213B	0.589306902169565
607	ST8SIA2	0.589194643047726
608	MGARP	0.58910794396905
609	SMG6	0.588965966583019
610	FNDC5	0.588928491309966
611	AR	0.588819039336161
612	LNPEP	0.588318120512404
613	PAFAH1B3	0.588253339314338
614	CELSR1	0.588100945471281
615	RNF39	0.587868623010167
616	NTRK3	0.587565607862846
617	SLC29A3	0.587158211368765
618	LRRC4B	0.587145443414607
619	CEP57	0.587087933388579
620	SCG5	0.586970645087207
621	PDIA5	0.586609258313391
622	AGR2	0.586133533299451
623	LPPR3	0.585935430248149
624	C1QTNF3	0.585856246785261
625	DVL2	0.585791183146508
626	C11orf89	0.585688959863136
627	MCHR1	0.585604752728448
628	TNNI3	0.58558505341079
629	FBXL3	0.585471351064712
630	ITPRIPL1	0.585200343384534
631	MPPED2	0.585158703626971
632	SDS	0.584887139897041
633	SPP1	0.58481892294841
634	ADHFE1	0.584658878887242
635	BIN1	0.584495023432225
636	ZNF469	0.584308948309447
637	C1QL1	0.584220378665634
638	TRPS1	0.584193651266144
639	PBX3	0.583853604206965
640	TMEM52	0.583571154178703
641	CDK2	0.583460538609288
642	RAB27B	0.583090647069683
643	NAGA	0.583009773897457
644	CDH24	0.582974946416716
645	TCHP	0.582737695156077
646	SLC17A7	0.582646398759004
647	CTIF	0.582519139976679
648	LRMP	0.582489453386399
649	RIMS4	0.582484023360627
650	USP43	0.582477701468333
651	NDN	0.581959117700714
652	PIAS3	0.581622766371257
653	CD300LF	0.581412642520041
654	NRXN2	0.581258023106547
655	C1orf228	0.581054155196343
656	ADAM12	0.580846116336496
657	ACTR1B	0.580768763899052
658	RGS7BP	0.580651893173446
659	SDHAF1	0.580642499065973
660	PARP2	0.580588873819397
661	GREB1L	0.580467096466281
662	WIPF3	0.580164589278843
663	TMCC3	0.579658658260872
664	FCN3	0.579523940904427
665	BDKRB1	0.579099936589501
666	TOM1	0.579023473145051
667	TEX2	0.57840353227072
668	ZNF121	0.578229654330328
669	FAM65A	0.577980695751734
670	WSCD1	0.577862292546361
671	CST9	0.577163824735593
672	NMT1	0.576947121114261
673	RXRB	0.576887839170251
674	SMG9	0.576400771503273
675	ESYT1	0.576379159401136
676	LOXL2	0.57635656550021
677	PTPRD	0.576352956200603
678	SSX2IP	0.575726257775018
679	MB21D2	0.575415004005732
680	PLEKHG4	0.574867768353814
681	NRG2	0.574589778827876
682	CSRNP3	0.574548599848632
683	COPZ1	0.574260398766005
684	RNF146	0.573979253129173
685	VNN1	0.573895697332977
686	TWIST1	0.573848232354324
687	PROK1	0.573538423989518
688	PLA1A	0.573340296701535
689	RCBTB2	0.572784618321439
690	MPP3	0.572772898618158
691	ADRB1	0.57264304945842
692	KPTN	0.572624539274983
693	LRRC1	0.572554971966326
694	TMED5	0.572470391161171
695	TMEM200B	0.57190055938148
696	DMD	0.571414319289124
697	PCED1B	0.571177683486116
698	PCBD1	0.571002687983899
699	FGF1	0.570744326293977
700	ROBO1	0.570594582612069
701	HRASLS5	0.570539551716395
702	TRIM47	0.570257204107584
703	SHC3	0.570139523909562
704	TUSC3	0.570076564351139
705	MUC15	0.569972393754706
706	STON1	0.569842124282528
707	PCP2	0.56971593345572
708	GPR3	0.569634898020082
709	CAB39L	0.569577413386898
710	TNFRSF4	0.569531240663012
711	PRRG2	0.5693961485134
712	PDZD7	0.569368809762528
713	KIAA1199	0.568586458357802
714	PEX11B	0.568459083851432
715	NLK	0.568356908315789
716	HPX	0.56808685003559
717	HPN	0.568075541396425
718	HOXA9	0.56804725344243
719	CIZ1	0.56803947005999
720	MFAP3	0.567455787920974
721	ARHGEF26	0.56737450685631
722	GJC2	0.56700446355291
723	MPP2	0.566901275014767
724	MKL1	0.566691018918916
725	THEM6	0.566599518413801
726	MUC16	0.566583517324126
727	PISD	0.566546313107056
728	DYM	0.566293985498439
729	TPP2	0.566227276067091
730	NTNG1	0.566188739161083
731	RYBP	0.566067515053624
732	TEX261	0.56590371849777
733	C2CD4C	0.565689674561263
734	TREML1	0.56552852487695
735	RCL1	0.565450534482882
736	EARS2	0.565124425240693
737	FAAH2	0.56506628091927
738	SYT4	0.564616222101252
739	IGFBP3	0.564537389374661
740	UBP1	0.564357889280906
741	PLEKHA7	0.563743847584007
742	SH3GLB1	0.563709488035083
743	CMTM2	0.563603216121178
744	ORC5	0.56336064558662
745	GRB7	0.563035828956856
746	ADAMTS9	0.562982593938979
747	CBLN4	0.562843676281477
748	IL18BP	0.562561694167031
749	AKAP6	0.562461682605263
750	MCOLN1	0.562427306288891
751	BIN3	0.561919755279775
752	TRIM17	0.561415405888453
753	SDR39U1	0.561406294976525
754	IKBKB	0.561177649260785
755	NLRC4	0.561125880107224
756	RHPN1	0.560850023831652
757	LYSMD2	0.560667934275438
758	RNF38	0.560565628608491
759	ALX4	0.560366471989092
760	COX14	0.560186134243265
761	CASD1	0.56015366425033
762	GAPT	0.560152855977138
763	SCGB2A2	0.559689245858674
764	RASA2	0.559568405730416
765	TLCD2	0.559542900870848
766	YBX2	0.559535058038566
767	LYPD3	0.559444569428
768	HTR2B	0.55909545269452
769	RIN1	0.559086474642954
770	FIGF	0.558285452708115
771	FGFRL1	0.558216908357399
772	TRAF1	0.558175335318402
773	ANKRA2	0.557916254394199
774	C12orf79	0.557891136081285
775	SCO2	0.557716637866393
776	TMEM139	0.557633948866539
777	MSC	0.557475251104723
778	ANKRD28	0.557343370877455
779	ACE2	0.557336396448819
780	SLC16A2	0.557238492635997
781	SYNE2	0.557162988268118
782	RNF217	0.557058352058211
783	AIM1	0.556938131561107
784	MEX3B	0.556937674993258
785	C11orf21	0.556118930289977
786	VAMP1	0.556056215522081
787	SNX33	0.55599308724707
788	PRR26	0.555739702158858
789	B4GALNT3	0.555711642717453
790	P2RX6	0.555657397865877
791	CCDC9	0.555654647596386
792	CLCA2	0.55559962806254
793	ATF5	0.555465653605076
794	ALDH1A2	0.55534059237283
795	TNRC6C	0.554966576499193
796	SPTBN2	0.554888628087816
797	NUP210	0.554759479124714
798	ARHGAP32	0.554506835027067
799	FAM84A	0.554471244201871
800	HSPB11	0.554204412225469
801	LYPD6B	0.554144054851658
802	MFHAS1	0.554136967213211
803	FNDC4	0.55403370425807
804	DDRGK1	0.553985517617138
805	PTBP3	0.553340484358181
806	HRSP12	0.553200456162693
807	SH2B2	0.552898403353971
808	PPAP2C	0.552818663032395
809	FAT3	0.552447443075464
810	P2RY14	0.552116564621081
811	SPATA7	0.552004393190555
812	RAB34	0.551982066918898
813	PRICKLE4	0.551920341394026
814	TM7SF2	0.551814831480803
815	TRAT1	0.551656823122361
816	NEIL1	0.551509553133874
817	FAM124B	0.551214297190706
818	WDR46	0.5510549871132
819	ZNF618	0.550962375387893
820	IGJ	0.55094391938853
821	HOXC10	0.550913584611011
822	COQ3	0.550734719526589
823	HOXD10	0.550682127358985
824	DRP2	0.550551289678154
825	ZNF438	0.550535543808449
826	KLHDC7A	0.55037690130921
827	EIF2B5	0.550170576784123
828	CYFIP2	0.549718274046204
829	RRAD	0.549401710139247
830	PENK	0.549367951215177
831	MARK2	0.549164965419426
832	PRR15	0.549006405862748
833	HIST1H1D	0.548956199439401
834	KIAA1671	0.548910006701582
835	KMT2A	0.548704385178809
836	MFSD12	0.548613159397997
837	ANK2	0.548522474289741
838	MED13L	0.548442652607639
839	CDC42EP1	0.548332552207209
840	GNA14	0.548314126343965
841	IL24	0.548242580299448
842	ARID2	0.547891200933854
843	PHF14	0.547629986684006
844	TMEM163	0.547182603785987
845	FUCA1	0.546844371961604
846	RNF43	0.546836457873123
847	SMEK1	0.546736248177193
848	MARCH5	0.546522993021606
849	MGAT4B	0.546436918363543
850	FZD8	0.545861038006499
851	GNMT	0.545780520539659
852	ZNF267	0.545765204276987
853	LPAR5	0.545725707967116
854	DEGS2	0.545545518734096
855	NRG1	0.545506731179962
856	PTCH2	0.545477893984902
857	TMEM25	0.545079218701103
858	SSPN	0.545037230937965
859	AQPEP	0.544823672015088
860	C16orf74	0.544783184004379
861	PUM1	0.54475835183334
862	CPSF4	0.544621980660118
863	ELOVL3	0.544590438233717
864	IGDCC4	0.544335822524959
865	UBTD2	0.544175922576212
866	RPGR	0.543779195009574
867	HES6	0.543708378020425
868	ANKMY2	0.543440085981594
869	RASL11A	0.542898577423682
870	DACH1	0.542655425762096
871	GALNT3	0.54256757640662
872	MDK	0.542403344847522
873	NEBL	0.542146697846656
874	LTF	0.542100015791772
875	FAM117A	0.541849915040976
876	ZNF436	0.540935333534281
877	MSI2	0.540825991085846
878	KCNH8	0.540677022299567
879	PPT1	0.540244860687987
880	SSTR2	0.540146211549448
881	ARHGAP36	0.54014517715349
882	GRIK3	0.539995536051638
883	ATP13A3	0.539876898856791
884	TMEM176B	0.539464784096432
885	RARRES2	0.539325799212312
886	RAB3C	0.5391448038545
887	CHML	0.538783353682171
888	SAMD3	0.538313539911271
889	HOXD9	0.538142894103788
890	ANAPC7	0.537941591504758
891	COBL	0.537938475381366
892	GRHL1	0.537379136117976
893	BOC	0.537060426608222
894	SH3TC2	0.536960844840514
895	NR3C2	0.536915471340432
896	PHIP	0.536875371446806
897	PDGFB	0.536858425408428
898	FAM219A	0.536736680157183
899	ZMYND15	0.536604045484775
900	MATK	0.536268296657659
901	MBOAT7	0.536239579601268
902	DCAF15	0.53611372250344
903	NKAIN4	0.536037378830859
904	GLRB	0.536000533632539
905	TMEM102	0.535762170465335
906	INHBA	0.535617804576669
907	ARRDC1	0.535562304260032
908	BTD	0.535291606844903
909	RGL4	0.534925686934713
910	ROCK2	0.534880670625925
911	CARNS1	0.534791894245548
912	AC007461.1	0.534590824825025
913	TET2	0.534387897988511
914	SENP6	0.534322543509795
915	NTN4	0.534308262168644
916	C10orf105	0.534154724865976
917	ZIC1	0.534032593715242
918	GPR20	0.533983571600883
919	ITGB8	0.533966913349441
920	DKK1	0.533638137473751
921	SH3BP1	0.533615475822172
922	ZNF224	0.533610202117337
923	OR51E1	0.533555751613174
924	LRRC8C	0.533488876973002
925	TRAF2	0.533450722285316
926	FMNL3	0.533185812867056
927	RNF149	0.53291964574395
928	ALPK2	0.532750222904972
929	TLR5	0.532736205340731
930	KANSL1L	0.532379844949959
931	DLAT	0.532301534803807
932	C5orf46	0.532293470017882
933	SSH3	0.532226857187702
934	MTERFD3	0.532225458235513
935	TRIM23	0.532146317674979
936	CHIT1	0.53164248119191
937	SYTL2	0.531607830970247
938	CAPN1	0.531242270396529
939	TRERF1	0.530916368536669
940	LTBP1	0.5308582158601
941	MOGAT1	0.53080190725983
942	KLHL13	0.53078223074406
943	PHLDB2	0.530761725836503
944	ZNF644	0.530728801280741
945	GLIPR1	0.530704107609048
946	CLIC2	0.530589400204675
947	AFF2	0.530478698598429
948	CUZD1	0.53019700026221
949	VPS51	0.530165247989886
950	CDK19	0.529931486853302
951	RNF219	0.529758943695053
952	FAM167B	0.5295780637701
953	TMCO6	0.529536914991074
954	RAI1	0.529494812642843
955	ADCY1	0.529176154367724
956	GPSM1	0.529036272111009
957	MADD	0.528827663954795
958	GNAO1	0.528692557879024
959	DSC2	0.528650031393891
960	GSAP	0.528483366056903
961	GALNT12	0.528215489985113
962	EMX2	0.528173823740849
963	TNN	0.52815925019177
964	RIPK4	0.528115627101656
965	MSLN	0.528088307038844
966	RASAL2	0.527964365868478
967	KCNMA1	0.527653782911364
968	CPD	0.527514182863259
969	USP15	0.527473850818532
970	CD47	0.527242536829582
971	ACSM3	0.527086105746683
972	TCTEX1D1	0.527065559366231
973	TRPC4	0.52700182053432
974	TMEM79	0.526892187030574
975	MAPT	0.52683419681948
976	PAPD4	0.526786427245501
977	SLC25A12	0.52676493221011
978	C1orf159	0.526577155013873
979	GRAMD3	0.526448652554919
980	ACVR1	0.526392350164071
981	ZBED5	0.526340410882021
982	TRIP6	0.526287623735678
983	PTPRM	0.52621038895935
984	FCHSD2	0.526178702049809
985	BARX1	0.525597816967296
986	USP31	0.525593357460374
987	BBS4	0.525581109871868
988	MAP7D1	0.525460189023109
989	CHRDL2	0.525378203915077
990	LY96	0.525162024823963
991	RAB17	0.525098288950453
992	MCC	0.525033151253531
993	HOXC6	0.525005137036566
994	HDGFRP3	0.524920703368021
995	OSGEPL1	0.524652046114132
996	PTPRO	0.52451172158244
997	MRGPRX2	0.524421448394683
998	MLF1	0.524172031101457
999	NLGN2	0.523970731707079
1000	CLIC5	0.523782354519094
1001	FCER2	0.523554747793155
1002	MBNL2	0.523187293249469
1003	DMXL2	0.52303371379195
1004	LSMEM1	0.522609885178639
1005	DENND2D	0.52239190564208
1006	RRAGC	0.522372434656554
1007	CCNT2	0.522287164613906
1008	RAP1GAP	0.522148255613126
1009	RGS4	0.522085795688464
1010	CASZ1	0.522029965147369
1011	MGAT2	0.521638267982073
1012	ETAA1	0.521305041664092
1013	RSRC2	0.521286371317041
1014	GRAMD1C	0.521263158446129
1015	RASAL1	0.521184707648248
1016	FOXC2	0.520989601086124
1017	PRR5L	0.520911209815735
1018	ARAP2	0.520830285212348
1019	ITPR2	0.520467770359112
1020	SFMBT2	0.519906781775335
1021	MCTP1	0.519720535087448
1022	DHX58	0.519581730089484
1023	SLC12A7	0.519485602803459
1024	PLXNA4	0.519397568348409
1025	TRIM3	0.519392743049529
1026	C15orf38	0.519296943405136
1027	PTPRQ	0.519163235122563
1028	RNF31	0.519012193327852
1029	ATP10A	0.519000252417417
1030	ZMYM2	0.518985716314521
1031	ROR2	0.518974601968862
1032	CHD6	0.518727934950579
1033	LPPR4	0.518425599698706
1034	TP73	0.518278779825184
1035	FAM208A	0.517591567095417
1036	DTX1	0.517540514717297
1037	FAM105A	0.517515960767583
1038	CAPN6	0.517435592751899
1039	LAMTOR2	0.517203935584171
1040	PGBD5	0.517167626264733
1041	TJP3	0.517162356073087
1042	CT62	0.516985376827897
1043	ELP2	0.516654223194176
1044	C17orf72	0.516636965575412
1045	LRFN5	0.515985341569761
1046	SLC7A3	0.515816728582686
1047	RBMS3	0.515730241366944
1048	SLC7A4	0.515603200185673
1049	PCDH17	0.515274271635581
1050	ANKRD24	0.515225492006481
1051	REV3L	0.515163089756718
1052	TMEM71	0.514937425056775
1053	PIAS1	0.514914427522451
1054	APBB2	0.514873174747442
1055	MSL2	0.514783175738858
1056	TEFM	0.514623816877789
1057	NTF3	0.514522920468659
1058	CD40LG	0.514460676490277
1059	TSPAN12	0.514308307290147
1060	HOXD1	0.514110399641006
1061	OMG	0.514076134815472
1062	PGS1	0.514046657544207
1063	ZSCAN9	0.513914632117688
1064	MAP3K12	0.513283629111424
1065	CLSTN3	0.513167287196834
1066	TRIM9	0.513129376340093
1067	CD164L2	0.51271024231121
1068	NR2F1	0.512676009780861
1069	PLCH1	0.512661838629974
1070	RAPGEF5	0.512498126834332
1071	PCDH19	0.512236330746934
1072	FAM212A	0.511931488242038
1073	ADIPOR2	0.511830773358996
1074	PGAP1	0.511560387774432
1075	PTPRS	0.511556895503931
1076	CHAD	0.511556185407194
1077	MAB21L2	0.511537700498795
1078	BCL7B	0.511288957497179
1079	COL18A1	0.51097768406451
1080	LRRC4C	0.51091424125958
1081	SLC19A1	0.510829506229985
1082	PEX5	0.510406530671495
1083	NAALAD2	0.510205280977235
1084	RYR1	0.51020030195697
1085	NR1H3	0.510050630905146
1086	PPM1L	0.510014180181423
1087	KBTBD11	0.510006116549513
1088	IGFBP5	0.509968019954835
1089	AKAP9	0.509797241953184
1090	TACR1	0.509668135239667
1091	FOXI1	0.509469479148882
1092	ATP6V0B	0.509164277347595
1093	MITD1	0.509077778734276
1094	CPZ	0.50903778939014
1095	NEK6	0.508965465492699
1096	DGAT1	0.508892520233175
1097	SMAD3	0.508754838940806
1098	CLSTN1	0.508747704698414
1099	SLC7A10	0.508700377671131
1100	NR2C2	0.508417075861095
1101	SLC9A9	0.508362395579132
1102	AGPAT4	0.508266982961309
1103	PRLR	0.508090981102184
1104	NUMBL	0.508067732963753
1105	MAP2K6	0.508030688070143
1106	PDZD4	0.507943611152565
1107	PPP1R14C	0.507831959936937
1108	KLC2	0.507830806443067
1109	PTPN3	0.507740553963225
1110	GET4	0.507541771627832
1111	RAC3	0.507222064473683
1112	FGFR3	0.507154332759353
1113	SORCS1	0.50691624205441
1114	DUSP4	0.506847954834837
1115	ARVCF	0.506736503375696
1116	EAF1	0.506408138536798
1117	SUPT20H	0.506166454976313
1118	REC8	0.506069587566722
1119	VPS52	0.505942330318306
1120	ADCY2	0.505864478725573
1121	MBP	0.505829580508745
1122	KIF17	0.505788256434819
1123	GPR88	0.505667905451054
1124	RASSF9	0.505568500667679
1125	HEG1	0.505454044829783
1126	DIRAS3	0.505283944921873
1127	SETBP1	0.505180886209027
1128	YPEL4	0.505164782560666
1129	DMTN	0.504834466895798
1130	CMTM8	0.504750822110987
1131	HDAC3	0.504726406813511
1132	KLK3	0.504645817824488
1133	SLC4A8	0.504602685583701
1134	GABRA4	0.50456409642855
1135	INPP5J	0.504421167030505
1136	AMPH	0.504284156309279
1137	CAMSAP2	0.504268673815909
1138	PANX1	0.504240613334968
1139	CACHD1	0.504173076084172
1140	SERPINA5	0.503860759491875
1141	EXT1	0.503537387894166
1142	PDZD2	0.50353524136282
1143	VAX2	0.503284058982226
1144	PRRG1	0.50313116254751
1145	DHH	0.50306622017708
1146	ARHGAP20	0.502917536944266
1147	SLC25A18	0.502836026399721
1148	NFATC2	0.502616874275773
1149	TMEM14A	0.502531505570389
1150	CDYL2	0.502498864152658
1151	MYEOV	0.502287187373419
1152	KCNC4	0.502248146882595
1153	MAPK13	0.501928731092012
1154	GRIA1	0.501913320522113
1155	HHIP	0.50188633282155
1156	AGRN	0.501781895364486
1157	CXCR5	0.501608075708372
1158	FAM13A	0.501560741060077
1159	MYRIP	0.501549060517788
1160	MERTK	0.501306692030924
1161	GRAMD1A	0.501203477519619
1162	EPHA4	0.500988483806471
1163	FAT2	0.500718361222975
1164	HSD11B2	0.500717517402634
1165	CNTN3	0.500584799702757
1166	WNT10A	0.500479320077908
1167	LMX1A	0.500454959053685
1168	ARSJ	0.500283706570518
1169	PRPF39	0.499941475968487
1170	GPR174	0.499928102188722
1171	ST5	0.499747498838531
1172	TNFSF13	0.499555683595021
1173	WASF1	0.499432961198264
1174	NCOA3	0.499415887850467
1175	GABRE	0.499107551721914
1176	SLC25A44	0.498839957494531
1177	MSH2	0.498810926782332
1178	ABCG1	0.498786789640078
1179	RGS14	0.49870223150884
1180	CD274	0.49849875605319
1181	PIH1D1	0.498419180158833
1182	AGO2	0.498419094412998
1183	CRABP2	0.498308535350433
1184	OXA1L	0.498253008322769
1185	PHF8	0.498188639357846
1186	GPR68	0.49810084800154
1187	DDX39B	0.497830657064901
1188	C7orf60	0.497758571387399
1189	NKD1	0.497590098895974
1190	GRID1	0.497581107417173
1191	FLYWCH2	0.497546103900806
1192	RARG	0.497514489319091
1193	DHX15	0.497186420764415
1194	CDKN2B	0.496967098349682
1195	IRX2	0.496799383491592
1196	KCNE1	0.496527070575941
1197	MAP3K10	0.496465857013151
1198	STX4	0.496248362871336
1199	SCN1B	0.496101396122987
1200	FHL3	0.496066994542759
1201	PPAPDC1A	0.495699279439873
1202	MAML2	0.495681967970273
1203	SH3KBP1	0.495502399331802
1204	GPBP1L1	0.495405870280726
1205	NFKBIE	0.495334617616799
1206	COL5A3	0.495306960687353
1207	THAP7	0.495175010867699
1208	CCDC28A	0.495034742653327
1209	SYT8	0.494727136911361
1210	HADH	0.494364692440303
1211	NTM	0.4942515251895
1212	ST6GAL1	0.494118118391496
1213	FAM19A5	0.49404479046592
1214	XPC	0.493937827971008
1215	CLTB	0.493813142258335
1216	RFXAP	0.493429322363159
1217	KAT6B	0.493405593408586
1218	GPR171	0.49339388247258
1219	MKL2	0.492864686561242
1220	GNG12	0.49245386875625
1221	CLMN	0.492444598574209
1222	HOXC8	0.492437147623458
1223	CCR10	0.492405110263218
1224	PIP4K2C	0.492381695461911
1225	CDC42EP2	0.492323769930553
1226	HIGD1B	0.492293869803782
1227	SYTL5	0.492286071373874
1228	NMRK2	0.492276656999655
1229	BSDC1	0.492053860076794
1230	PHKA2	0.491909605240616
1231	NT5C	0.491639984514498
1232	PDRG1	0.491628687805808
1233	NOVA2	0.491473287784219
1234	IRF4	0.491442974696727
1235	DAPK1	0.491236921734472
1236	NPPA	0.49112845849585
1237	RELN	0.490899375680933
1238	SYNDIG1	0.490881722201198
1239	PROSER2	0.490746282912088
1240	SLC41A1	0.490665570208814
1241	NAPEPLD	0.490609604071932
1242	SLC26A10	0.490524868322424
1243	EFNA5	0.490364093289265
1244	PAQR6	0.490294160460151
1245	KLK11	0.490163649688015
1246	ABCB11	0.49015116811727
1247	CERS2	0.490139749531074
1248	MAPK3	0.48973667501336
1249	CSTF3	0.489734626854403
1250	PCDH18	0.48965353675286
1251	SEMA3A	0.489641734584779
1252	PKP3	0.48955197638321
1253	AMPD1	0.48940188239209
1254	HRC	0.488881994094594
1255	MECP2	0.488816014224427
1256	LALBA	0.488766620816139
1257	EDN3	0.488626907487182
1258	NHLRC3	0.488214311890339
1259	SGCA	0.488076359563452
1260	CYP26A1	0.488073394495413
1261	CCDC93	0.487801896482932
1262	RTN4RL1	0.487743372061144
1263	C9orf152	0.487603670591727
1264	WNK2	0.487554959788292
1265	HSD17B14	0.487493916262895
1266	EXTL3	0.487467213714279
1267	DHPS	0.487432490678775
1268	BSCL2	0.487356787536911
1269	MAT2B	0.487337022991687
1270	MS4A14	0.487242280345802
1271	ZDHHC18	0.487176174505315
1272	DTNB	0.486993139493067
1273	LAMA1	0.4869855683767
1274	DNAI1	0.486921651238988
1275	ADAMTSL1	0.486908479089604
1276	ZSWIM8	0.486848950571798
1277	SLC52A3	0.486749225989845
1278	SBK2	0.486707985015904
1279	GPR144	0.486685032139578
1280	SORCS2	0.486331194610009
1281	EML2	0.486295042737261
1282	MAP3K11	0.486277845621266
1283	PHF19	0.485956437032498
1284	RANBP10	0.48586040769779
1285	GYLTL1B	0.485750100382204
1286	IL18RAP	0.48572130361351
1287	C1orf173	0.485683958661189
1288	GRIK4	0.485338478386312
1289	HAS3	0.485290463100953
1290	PRKAG2	0.485253814925589
1291	MUS81	0.485202019144168
1292	EPM2A	0.484968979757498
1293	CSNK2B	0.484897162688017
1294	LRRC4	0.484879568217824
1295	ECHDC3	0.484769454740878
1296	DLG5	0.484734378113922
1297	HMGCS2	0.484705896579357
1298	C1orf95	0.484639029488963
1299	RHCG	0.484607580134557
1300	ST8SIA6	0.48459499287004
1301	TTC38	0.484589619297423
1302	MYO19	0.48445060617007
1303	PC	0.484349536386625
1304	NPHP4	0.484306772585143
1305	NUPL2	0.484169746361345
1306	UBALD2	0.484148225634955
1307	ARID4A	0.484131407075604
1308	VAPA	0.483821563093022
1309	LHFP	0.48371169422268
1310	TRMU	0.483576676366092
1311	ABCC1	0.483423780913066
1312	NIPAL3	0.483343880243355
1313	GLTSCR1L	0.483292121253666
1314	CXCL6	0.483235354532775
1315	RGS11	0.483219570339815
1316	MRPL18	0.482844710136594
1317	ZBTB9	0.48281583420399
1318	GART	0.482770764803186
1319	TBC1D30	0.482662562576598
1320	LSR	0.482534171535034
1321	RAP2B	0.482142213509272
1322	THRA	0.481760924683395
1323	PSME1	0.481517097854506
1324	FICD	0.481285092693716
1325	SERTAD2	0.48062785484219
1326	CADPS	0.480609453090575
1327	DBNDD1	0.480602602811302
1328	PWWP2B	0.480507424464426
1329	CALCRL	0.48050702213773
1330	ARHGEF6	0.480391448475971
1331	ITGB5	0.480358720665121
1332	DCXR	0.480174822007192
1333	AGTR1	0.480072251787334
1334	ENPP2	0.4800472985879
1335	PTPRU	0.480030105319047
1336	GNLY	0.479989850747228
1337	RAB33A	0.479979150825404
1338	M1AP	0.47991209123913
1339	ALS2CL	0.479899871859821
1340	DAW1	0.479849471198217
1341	RAB40C	0.479748563288938
1342	CYP27B1	0.479744068535339
1343	FSIP1	0.479529466036213
1344	GFI1	0.4794071321671
1345	SUCNR1	0.479338328889065
1346	UBD	0.479311752709645
1347	FAM26F	0.479242161041666
1348	AKAP2	0.479238509060665
1349	C19orf38	0.479153483566078
1350	CDH13	0.479148334021612
1351	SPHK1	0.479076683728784
1352	FBXL20	0.479065160240634
1353	XPR1	0.479003107890976
1354	HDLBP	0.478976469549542
1355	GOLM1	0.478962954630899
1356	HPSE2	0.478892009105864
1357	AAAS	0.478866277432859
1358	MCM6	0.478516932922879
1359	CTNNBIP1	0.478471840829645
1360	TP53AIP1	0.478389548918446
1361	HOXC11	0.478386526538744
1362	RECQL5	0.478346974366618
1363	TRPM2	0.478154747349045
1364	CDK5RAP2	0.478123445115248
1365	EPB41L1	0.478075085442183
1366	LRRK2	0.477973763666326
1367	LMAN2L	0.477956062454147
1368	ATPIF1	0.47789712609016
1369	ARAP1	0.477742498914882
1370	NGF	0.477604632228605
1371	S100A2	0.477584531960209
1372	LRP4	0.477566488341335
1373	ADRA1D	0.477415637835937
1374	SERTAD4	0.477414044529776
1375	FOXO6	0.477335833809635
1376	KMT2E	0.47729396462906
1377	KCNH3	0.477261830127764
1378	DPRX	0.477070578722421
1379	DOC2A	0.476951102502063
1380	HIST1H4E	0.476901088135918
1381	EHBP1	0.476866160285993
1382	ZHX3	0.476816665168959
1383	KIAA1432	0.47675002364651
1384	FAM46A	0.476731838221594
1385	JAG1	0.476652892832929
1386	PTHLH	0.476612095363965
1387	AGT	0.476573530612556
1388	SEMA5A	0.476567793543463
1389	ATP2B1	0.476405078343878
1390	NPTN	0.476364547941991
1391	THBS3	0.476296829621704
1392	DDX60L	0.476088936303953
1393	LRIG3	0.475981712287254
1394	NBL1	0.475845459193523
1395	MFSD8	0.475837716176232
1396	MZB1	0.475812536495698
1397	CNTNAP1	0.475783837006466
1398	EPHA3	0.475334213394146
1399	RANBP3L	0.475207189837202
1400	PROK2	0.475124937793253
1401	MOB2	0.475109877249913
1402	SEL1L3	0.475053492652257
1403	IGSF1	0.475031718509295
1404	EPHB3	0.475010471263457
1405	ALAS2	0.474954294113878
1406	BSG	0.474911921441333
1407	PDHB	0.474881347310088
1408	COL2A1	0.474780194354465
1409	EPHB1	0.474762483483724
1410	PDE8A	0.474639987036198
1411	PAK1	0.47446856251061
1412	PTPRN2	0.474390405080432
1413	SMOC1	0.474335025183987
1414	RNF19A	0.474081497504951
1415	TET3	0.474024811854103
1416	RTN1	0.47369769541634
1417	KAT6A	0.473442123321289
1418	TNC	0.473374353513877
1419	CXCL13	0.472936894528498
1420	LMTK3	0.472924230864242
1421	PALD1	0.472766981045217
1422	CRYM	0.472762126472256
1423	CMKLR1	0.472660082223835
1424	RIPK3	0.472571381680136
1425	KIAA0195	0.472300966579593
1426	ZDHHC17	0.472183624072672
1427	PAPSS2	0.472169165129617
1428	MGAT3	0.472059324491341
1429	ACAD10	0.471939772408417
1430	FAM53C	0.471762471721389
1431	CDH3	0.471341147289028
1432	IL34	0.471176268217917
1433	IFIT5	0.471118707311646
1434	SPOCD1	0.471063809302779
1435	ZNF292	0.470999179265272
1436	SHANK2	0.470876299901461
1437	MEI1	0.470815149039483
1438	CAD	0.47065719740992
1439	LZTS1	0.470620694150767
1440	MKX	0.470496362837136
1441	ISOC1	0.470459198125197
1442	YJEFN3	0.470339069870006
1443	TSLP	0.470333791102576
1444	RHOBTB2	0.470277481732517
1445	DLL1	0.469917042735973
1446	PAK6	0.469749925964933
1447	MASP1	0.469705726852457
1448	FYCO1	0.469590601328875
1449	OTC	0.469583781203215
1450	MAML3	0.469558040232236
1451	CLEC4G	0.469551185338686
1452	PDE5A	0.469542549171578
1453	SGCG	0.469281601726235
1454	PITPNM2	0.469137272945829
1455	BRPF3	0.469083580914306
1456	SYBU	0.46906644028789
1457	TRAM2	0.469044757200019
1458	GCDH	0.468987807459322
1459	TMEM132A	0.468966092630881
1460	PRRX2	0.468947413667084
1461	ATP11A	0.468850996612208
1462	PRMT10	0.4688024524446
1463	DAB2IP	0.468634358334985
1464	LGALS3BP	0.468604065085143
1465	PIGB	0.46847348750392
1466	FOXJ2	0.468435749751347
1467	SDC1	0.468435428665812
1468	MCU	0.468404881110416
1469	CDKN2C	0.468399132213973
1470	TRIM25	0.468356347185811
1471	SMIM22	0.468268560581781
1472	CSF1	0.468221552997867
1473	HIST1H4H	0.46819317252131
1474	RUNX2	0.468185199992586
1475	VTN	0.468158271219765
1476	PIM2	0.468003143489006
1477	EPN3	0.467915548084985
1478	MLIP	0.467715695701172
1479	NEK11	0.467242939458803
1480	TP63	0.467138739064719
1481	SH3RF1	0.467120247948189
1482	MID1IP1	0.466895285800084
1483	ZNF185	0.466818259723732
1484	TRIM33	0.466775899630942
1485	FAM3D	0.466525561186775
1486	COL17A1	0.466265985541787
1487	ALAD	0.466144881457854
1488	NLRC5	0.466008964537885
1489	P2RY10	0.46551656400195
1490	RNF10	0.465397774434866
1491	NID2	0.46532972025729
1492	ZNF865	0.46520029376071
1493	TMEM38B	0.465135984858249
1494	BMP6	0.465085561970946
1495	CD1C	0.465041850668333
1496	S1PR2	0.46498353060505
1497	AIM2	0.464957346183153
1498	DERL3	0.46495272414591
1499	SCUBE2	0.464906579481222
1500	CNRIP1	0.464687819856704
1501	PGLYRP1	0.464653992515133
1502	CNTN4	0.464496240250925
1503	EGF	0.464494164240901
1504	LNP1	0.464366640980842
1505	KCTD14	0.463994194828415
1506	COX4I2	0.463941860030236
1507	PLEKHA6	0.463925061584613
1508	PHF15	0.463866200491844
1509	SAMD10	0.46371672209368
1510	PRKD2	0.463540861887085
1511	ADCY3	0.463167635303004
1512	PMM2	0.462990634230367
1513	SH3BGR	0.462974713245134
1514	SIM1	0.462865803894136
1515	ADAMTS13	0.462680755076133
1516	C6orf48	0.462667183966188
1517	C19orf26	0.462499975508109
1518	GREM2	0.462436848254217
1519	DNAH5	0.462236874203165
1520	ATP2C2	0.462213929370624
1521	FLRT3	0.462206276302392
1522	CRTAC1	0.462036292851512
1523	VWA1	0.462016094749422
1524	HDDC3	0.461686272295624
1525	SAA4	0.461656241970285
1526	ZDHHC19	0.461578235984841
1527	CHPF2	0.461563990199584
1528	SF3B1	0.461547591047237
1529	DIRAS1	0.46151667354567
1530	CLK4	0.461482811469686
1531	PAPSS1	0.461344209206669
1532	ZBTB10	0.461314614829965
1533	FOXQ1	0.461138658732037
1534	LRIG1	0.461115752717114
1535	C5orf54	0.46110589406498
1536	PLD2	0.461096399004073
1537	LYPD6	0.461078675469631
1538	ABHD14A	0.461034135845582
1539	SERP1	0.461012208159042
1540	NIPSNAP1	0.460992220486238
1541	AQP5	0.460851757739771
1542	RBBP8	0.46075263463433
1543	SH3D21	0.46071683167467
1544	PLEC	0.460660202800103
1545	TMEM121	0.460581195234972
1546	PDE10A	0.460394989129294
1547	EPB41L4A-AS2	0.460352680135467
1548	TNFAIP6	0.460308917498266
1549	TBCD	0.460248620982355
1550	PRKG1	0.460182736019888
1551	AP4B1	0.46015497361246
1552	CAMK4	0.460074430464523
1553	NEURL2	0.4599076479472
1554	PQLC1	0.459702463212736
1555	ATP11C	0.459578881306905
1556	KCNC3	0.459511069904289
1557	RILP	0.459488485361101
1558	TANC1	0.4594403485193
1559	NHSL2	0.459381616705011
1560	COL8A2	0.459353737598047
1561	SPEF2	0.459248522000932
1562	S1PR4	0.459191299738817
1563	TBC1D14	0.459076062331542
1564	ASUN	0.458865895516175
1565	PFDN5	0.45870588463577
1566	TAX1BP3	0.45859986064096
1567	TFRC	0.4585938059187
1568	PPWD1	0.458528197018317
1569	TRIM36	0.458460460812791
1570	CHKB	0.458203327894156
1571	PHLDB1	0.458162460802917
1572	DUSP26	0.457823528075055
1573	HSPB3	0.457780321195911
1574	SIGLEC6	0.457769649048747
1575	AGPAT9	0.457405007525166
1576	ADAM22	0.457380785683242
1577	TNFRSF17	0.457354053193844
1578	TRDN	0.457333404693721
1579	TNRC6A	0.457021837533976
1580	ENOSF1	0.456960780199168
1581	PRSS35	0.456867806492757
1582	PDLIM4	0.456835499820446
1583	SAMD9	0.456800358265313
1584	ANKRD10	0.456557468994006
1585	SEMA4A	0.456535019977982
1586	FRMD1	0.456483404522121
1587	TRIB2	0.456341746754574
1588	DNAH1	0.456245580881245
1589	ABHD1	0.456206088992974
1590	RIOK1	0.456182068107656
1591	NFKBIL1	0.456175387987793
1592	PVR	0.456149836214648
1593	KLK6	0.456122085220813
1594	SMO	0.456071337854108
1595	POLR1B	0.455973089677808
1596	ZFAND2A	0.455861421503053
1597	RAB25	0.455693162554503
1598	SH2D4A	0.455577504236632
1599	RNF175	0.455525818088265
1600	PKD2	0.455514012749756
1601	ZNF449	0.45545126891109
1602	CCSAP	0.45541226518067
1603	GUCY1A2	0.455407972252498
1604	SMIM10	0.455246891207275
1605	ZG16B	0.455206989089264
1606	ADCY7	0.455133559091834
1607	MYL7	0.455099381650077
1608	NR3C1	0.455083935874184
1609	VPS13A	0.454992978143248
1610	MORC3	0.454976690903209
1611	KIAA1551	0.454970074696002
1612	ABTB2	0.454921050551186
1613	GJB2	0.454858719520216
1614	BLCAP	0.45468304331058
1615	FES	0.454619736422256
1616	CDC37L1	0.454539473033487
1617	IZUMO4	0.454518832418558
1618	PCDHGA5	0.454396248534584
1619	TARBP2	0.454392063535714
1620	IL1B	0.454354240762378
1621	ZNF830	0.454324801244133
1622	DNAJB2	0.454224595257688
1623	PRNP	0.453998429223748
1624	PTGIR	0.453804842440146
1625	NOL3	0.453764694320432
1626	SLAMF1	0.453727875385007
1627	SPSB1	0.453668589097371
1628	EML4	0.453638578518076
1629	DLG3	0.453447067580324
1630	NUDT14	0.453327505002856
1631	CCR5	0.453259921811147
1632	EPHA1	0.453114157498861
1633	PLXNB3	0.453068291908218
1634	ZNF362	0.45295995748041
1635	PMAIP1	0.452643218243424
1636	HAAO	0.452600447819049
1637	WFDC2	0.452560487702761
1638	SLC36A4	0.452552505281716
1639	C11orf45	0.452546100490611
1640	ANGPT1	0.4525449796413
1641	TCF3	0.452505939910898
1642	POLL	0.452352497279817
1643	TMEM125	0.452344695660553
1644	FGFR4	0.452236188859385
1645	GNPDA1	0.451988808782403
1646	SAMD14	0.451957412262632
1647	CNTROB	0.451660815310977
1648	AUTS2	0.451539626100661
1649	PTPRZ1	0.451271547507085
1650	WBP5	0.451235086387703
1651	TPCN1	0.451224432092582
1652	MTF2	0.450795009262396
1653	TRIM8	0.450638965548464
1654	KLF11	0.450563376135001
1655	SLC25A27	0.450557354144149
1656	TMEM59L	0.450235744769547
1657	MGAT1	0.450155594836453
1658	ACRBP	0.44994673724767
1659	STON2	0.449771826805375
1660	MMP25	0.449745603822652
1661	C1orf54	0.449686996870099
1662	CHERP	0.449369523187659
1663	ZMYND8	0.449356364966148
1664	STAC3	0.449156437798788
1665	MT3	0.449136466022126
1666	HAL	0.44912967418155
1667	RALB	0.449103311347184
1668	PCDH20	0.44900716980944
1669	RHOJ	0.448720022787994
1670	ADD1	0.448658535910652
1671	TXNDC16	0.448390514052753
1672	TTLL4	0.448144572742027
1673	FAT4	0.4481258209459
1674	ANXA4	0.44772562571909
1675	YWHAG	0.44767198809203
1676	SHKBP1	0.447664793081713
1677	IRF5	0.447570711705088
1678	SPICE1	0.447458259191828
1679	MASP2	0.447311542763902
1680	SMAD1	0.447216264776361
1681	RAB24	0.447170024649965
1682	TIGIT	0.447114910518173
1683	SLC7A2	0.447091246529131
1684	OSR2	0.447084412474987
1685	PCP4L1	0.447060002162974
1686	CYTL1	0.447011038584947
1687	GCH1	0.446832480139157
1688	THAP8	0.446637542123017
1689	PLK2	0.446445062616847
1690	MARC1	0.446331265081162
1691	STC2	0.446317396282604
1692	RASGEF1A	0.446059178248547
1693	CNNM3	0.446033105442254
1694	EFS	0.445905692218346
1695	ART5	0.445435774757012
1696	CALML3	0.445322137526773
1697	SLC23A3	0.445168989806812
1698	CDC14A	0.444944529620653
1699	NUP107	0.444896395368654
1700	LIPN	0.444672344545048
1701	TMEM53	0.444531944857906
1702	TSPAN3	0.444451130833235
1703	KLHL42	0.444285747049533
1704	KLHL31	0.444182394313111
1705	RPL28	0.443943129626852
1706	COX7A1	0.443843638948117
1707	NOG	0.443806060033449
1708	SGSM2	0.443784962682324
1709	PPP2R5B	0.443574567439827
1710	ATP6V0A1	0.443520949954285
1711	KDM6A	0.44341342214659
1712	APBA2	0.443347757872961
1713	CRAT	0.443085492414843
1714	IRF2	0.443028444588603
1715	C5	0.442874930426013
1716	PDE1B	0.442713236250422
1717	TNK2	0.442660559215967
1718	CDK6	0.442511787818785
1719	TMEM176A	0.442401318493065
1720	TENM1	0.442398253849671
1721	DLG4	0.442374905128497
1722	RPLP2	0.4422940308808
1723	PLAT	0.442283248383495
1724	CCL20	0.442282411753677
1725	DAAM1	0.442210648022893
1726	SLITRK2	0.442181877505698
1727	DCD	0.442161304010337
1728	ZNF22	0.442068720180322
1729	MFSD6	0.441992808401377
1730	ACADS	0.441811758402092
1731	AHSP	0.441254581421599
1732	TAL1	0.441253246428089
1733	HSPBP1	0.441211885506393
1734	WNT4	0.441163193165957
1735	ZNF521	0.441019226026971
1736	MITF	0.441002075403415
1737	SPINT2	0.440953966884206
1738	TSHZ2	0.440863325465952
1739	CNKSR2	0.440815940716388
1740	ZNF689	0.440773320689288
1741	DEFB132	0.440685984624483
1742	HIST1H2AE	0.440504653280109
1743	DSCAML1	0.440391877138074
1744	CD300E	0.440372302135559
1745	ART3	0.440345726884842
1746	ANKRD13D	0.440062987992914
1747	ANO6	0.43995024035969
1748	ANKRD35	0.439933385083492
1749	ARHGAP18	0.439890031427624
1750	FKBP15	0.439874489963175
1751	CMTR2	0.4395411101195
1752	GPR15	0.439483405407506
1753	HIVEP2	0.439357807694764
1754	LHFPL2	0.43932566007665
1755	DLD	0.43920690492726
1756	CXCL9	0.439148254226036
1757	CCL21	0.439022457113699
1758	L3MBTL1	0.438969105793549
1759	UNC5A	0.438955400387279
1760	PRKCB	0.438947765052932
1761	LITAF	0.438878681245466
1762	HIC1	0.438521104806108
1763	PRRT4	0.438362612635263
1764	SYT7	0.438308419848968
1765	ARHGAP39	0.438268945608328
1766	IGSF10	0.438261029635292
1767	CDR2L	0.438117706376761
1768	RHOBTB3	0.438117608004744
1769	GNRH1	0.438103512828314
1770	RBM11	0.437938025599078
1771	HLX	0.437929169538528
1772	HLF	0.437925283812256
1773	RAB8B	0.437831864808029
1774	CD99L2	0.437607027884986
1775	SNCAIP	0.437470986682442
1776	PRMT7	0.437383143457717
1777	CAND2	0.437317415765841
1778	CD72	0.437161693759165
1779	KLHL29	0.437083470792642
1780	LDLRAP1	0.437014909116306
1781	HOXC9	0.436730862311691
1782	KCNK17	0.436719721365144
1783	ARRDC3	0.436664090110051
1784	FBXO46	0.436567568208845
1785	HEBP2	0.436227974057141
1786	NNAT	0.436196743086004
1787	TBX19	0.436074612437793
1788	TOP2B	0.436035667866152
1789	KLHL3	0.436034249980145
1790	C13orf45	0.436000830032948
1791	KCNB1	0.435827582153666
1792	SEMA6D	0.435821663499033
1793	FAM13C	0.435799684112236
1794	UTRN	0.435753311569668
1795	GPC6	0.435752872241323
1796	RALGPS2	0.435742470137212
1797	SPTAN1	0.435635207428292
1798	PELI2	0.435587037979961
1799	EPGN	0.435487148003057
1800	ACAD11	0.435484203889677
1801	LGR4	0.435476071842039
1802	ANGPTL7	0.435331947049894
1803	RYR2	0.435268257835731
1804	PLA2G4A	0.435263986148718
1805	CMAS	0.43517071208428
1806	MST1R	0.434873228600696
1807	SCNN1B	0.43465623440436
1808	SPRED2	0.434514553988744
1809	SIK3	0.434456144425002
1810	HIST1H3H	0.434439305314485
1811	ZEB1	0.434307178185052
1812	CABLES1	0.434286695911374
1813	CREB3L2	0.433974383167261
1814	PTPN5	0.433867519462648
1815	ADD3	0.433587819908318
1816	CXCL11	0.433548539020358
1817	ANAPC2	0.433459168130293
1818	SDR16C5	0.43328752255134
1819	EIF2D	0.433218479238604
1820	DFNB31	0.433101204389268
1821	H2AFJ	0.433066408116036
1822	NGEF	0.432779410527395
1823	CD59	0.432771080852766
1824	CCDC130	0.432768307331163
1825	KCNQ4	0.43275535912663
1826	AKAP13	0.432674838934998
1827	SLC26A3	0.432662978379902
1828	DDR1	0.432498950473897
1829	MAL2	0.432406521863342
1830	BMPR2	0.432271547560001
1831	FAAH	0.432242455152737
1832	PRRT2	0.432224941766922
1833	PRR16	0.432114249857698
1834	ADAT2	0.432019455251309
1835	ZBED3	0.431826702770256
1836	NRROS	0.431665205383739
1837	TF	0.431597278379121
1838	ERI2	0.431495014875128
1839	XRN1	0.431487689995796
1840	AMHR2	0.431409875074361
1841	GLI4	0.431308717321179
1842	IFFO2	0.431281509696114
1843	FRAT1	0.431125249641229
1844	DBNDD2	0.431079602078124
1845	PRM1	0.43094076611778
1846	PDF	0.430834469012938
1847	RSPO4	0.430774159039107
1848	MMP7	0.430713409079028
1849	SOCS7	0.430416509044767
1850	C2CD2	0.430410391665651
1851	NEK3	0.430379004668596
1852	BCL2	0.430373075328248
1853	RDH14	0.430269870097523
1854	CDKN1C	0.430038882091673
1855	TCN2	0.430038415771465
1856	DYNC2H1	0.429969342650979
1857	LRRC15	0.429782601001924
1858	PRKCDBP	0.429287068216609
1859	RGL3	0.429258775706178
1860	PTGER2	0.428933244075873
1861	HIST1H2BG	0.428909840516613
1862	WNT10B	0.42877277776451
1863	SREBF1	0.428726489589053
1864	VMO1	0.428630198806322
1865	TESK1	0.428474682001039
1866	LONP1	0.42845151190048
1867	ABHD5	0.428151421369443
1868	TMPRSS13	0.428149626376755
1869	PNPLA7	0.428107224966586
1870	RASA3	0.428086522166223
1871	ULK3	0.42773080704994
1872	RNASET2	0.427638761577123
1873	ESPL1	0.427599359825029
1874	CA1	0.427549438000484
1875	SLC25A30	0.427443760462241
1876	PKD1L1	0.42737443881364
1877	FMN1	0.427146143941686
1878	SSH1	0.427131135277172
1879	TMEM81	0.426969503255644
1880	C11orf24	0.426956623145449
1881	E4F1	0.426835249221279
1882	IL17B	0.426747742736346
1883	TGFBI	0.426478508380246
1884	NMI	0.426431680437928
1885	TCF7	0.426354017313172
1886	WFS1	0.426333345826618
1887	SH3TC1	0.426321979915355
1888	PRIMPOL	0.426291962317286
1889	KCNA5	0.426176273193018
1890	B4GALNT1	0.42612526085068
1891	KCNIP3	0.426094514045947
1892	LPHN1	0.426026980073305
1893	RADIL	0.426003801435066
1894	TBC1D13	0.425979065138969
1895	EXOC3L1	0.425899536552012
1896	LSM4	0.425871875229608
1897	GPR146	0.425866425194699
1898	DIXDC1	0.425789004309753
1899	SRRM3	0.425786215157653
1900	NAT9	0.425770759459396
1901	GAA	0.425683973088938
1902	STUB1	0.425568924504737
1903	TGM5	0.425535053008407
1904	ATP13A5	0.425533824476971
1905	DOT1L	0.425522732980577
1906	KRT79	0.425521190444429
1907	NLRP6	0.425492624014933
1908	ZNF750	0.425488034806644
1909	SLC18B1	0.42540903264284
1910	C6	0.425283385152503
1911	PLA2G5	0.425259817317791
1912	IGSF6	0.425061237257577
1913	ARC	0.424966516793947
1914	LGI2	0.424911617070129
1915	MAP3K5	0.424766216098573
1916	ANXA5	0.424682784091853
1917	IRX5	0.424549851858151
1918	NOD2	0.424531934738256
1919	LRP6	0.424333185695541
1920	RGS13	0.424151743895398
1921	SLC1A7	0.423995137299166
1922	TNFRSF11A	0.423975963695028
1923	CCS	0.423609000962967
1924	WSCD2	0.423590469676352
1925	EML1	0.42357503432844
1926	PTTG1IP	0.423097222317269
1927	PAQR4	0.422988137269145
1928	VCAM1	0.422788933545473
1929	PTPN22	0.422718197453332
1930	MMD	0.422635554388704
1931	CCL13	0.422628294572502
1932	PCSK1	0.422566725923858
1933	SH3RF3	0.422541725982435
1934	PRM2	0.42233778845159
1935	IL4I1	0.422221662199235
1936	WASF3	0.422172908553911
1937	REG1B	0.422120871583111
1938	GEM	0.421942110481743
1939	TRA2A	0.421891023449785
1940	KLK5	0.421883380359295
1941	SEPT4	0.421860556804201
1942	PPAP2A	0.421792138603016
1943	ZNF423	0.421785737586029
1944	GPBAR1	0.421737500568245
1945	ECHS1	0.421719770541116
1946	FAM69A	0.421706003836249
1947	TWIST2	0.421652639105204
1948	C1orf131	0.421497558159492
1949	ZNF740	0.421299350610769
1950	ACAA1	0.421245765562145
1951	SYCN	0.421154099918421
1952	GNAZ	0.421079906210939
1953	TTC13	0.421051358088242
1954	DCK	0.421031888181479
1955	CFP	0.420729415452172
1956	PGAP3	0.42072203897307
1957	OPN3	0.420641455705686
1958	EBF4	0.42060203068754
1959	HPD	0.420534351502605
1960	HMCN1	0.420382775275217
1961	KLHL15	0.420147090786005
1962	TMEM9	0.420085352712482
1963	S100A14	0.419947848893202
1964	CHST15	0.419880501391905
1965	TSEN54	0.419743680924714
1966	SIPA1L1	0.419709170238931
1967	MLKL	0.419472214593508
1968	FBL	0.41936295239354
1969	IMPDH2	0.41886730178583
1970	TLR4	0.418830243096994
1971	AMOTL2	0.41862963500131
1972	PIANP	0.41850901478478
1973	CBL	0.418461630875425
1974	EMILIN3	0.418420872259982
1975	BAZ1A	0.418331386660407
1976	C19orf33	0.418266420863424
1977	NKX3-1	0.418217742153758
1978	FAM171A1	0.418205386869101
1979	SH2D1A	0.41811443741087
1980	KLHL25	0.418079136800207
1981	CAPN8	0.417920196496235
1982	MAOB	0.417813093576963
1983	PTGER3	0.417633494094048
1984	GRP	0.41746868332736
1985	CYP4F22	0.417226457732612
1986	PON2	0.417183801358796
1987	RASD2	0.417084747616121
1988	RALGDS	0.416955666068791
1989	ANXA9	0.416940936371702
1990	PLEKHN1	0.416638163932101
1991	RAB2A	0.416516413184231
1992	LAD1	0.416414885927954
1993	LCAT	0.416404957764798
1994	C12orf39	0.416061967415007
1995	CCR2	0.415932605993511
1996	MARVELD1	0.415889034631788
1997	UNC5C	0.415841157278598
1998	ARMCX1	0.415821727673689
1999	TP53I13	0.415788140033665
[truncated: 7,918 more rows]

## Sheet: Group2 (TE-IR)
rank	hub	r
1	TTC36	0.996606802946288
2	DNAJC27	0.995193104591414
3	GLYAT	0.979590209243492
4	USP48	0.972303125565348
5	RHOXF1	0.948488496975112
6	ACVR1C	0.940974945742332
7	SRCRB4D	0.933211883970138
8	IRF4	0.933206633411767
9	MRAP	0.929203240661869
10	HEPACAM	0.920968316126735
11	FAM208B	0.913050375003018
12	AP1M2	0.893454433197394
13	DRAM2	0.891467765963693
14	DAGLA	0.88986547928392
15	RIT1	0.889222957225951
16	SLC27A2	0.886487570222312
17	TAB1	0.885456885456886
18	GLIS1	0.881549815498155
19	ADAMTS18	0.879275281937511
20	KIAA1239	0.87595030595216
21	FGD1	0.871135940409683
22	NAT8L	0.870479597020749
23	ELFN1	0.862236336377705
24	C19orf80	0.862148717532783
25	RAB25	0.860980884848877
26	ARHGDIG	0.853775202652529
27	SCGB2A2	0.845819543125838
28	IL17RC	0.845780677186266
29	TUSC5	0.843699484868974
30	THSD7A	0.841052119522572
31	MESP1	0.840776656283709
32	TRAT1	0.839246973406256
33	CCDC68	0.839207953740064
34	CELF5	0.839142091152815
35	PRRG1	0.836739459568008
36	DDX47	0.833747882759155
37	C10orf90	0.833342708205974
38	LRCH1	0.831443132182633
39	SULT1C3	0.830901430531936
40	MSLN	0.829534319340816
41	SMPDL3B	0.829202791377269
42	SH2D1A	0.824761196834775
43	PIP	0.823807158425724
44	PEX19	0.822542101780281
45	KCTD3	0.821599838961198
46	C17orf85	0.821539206849556
47	SLC6A2	0.820811921227846
48	ZNF697	0.820772288301168
49	SPDEF	0.820596286240379
50	DLD	0.817986576478029
51	ACE2	0.816376557499986
52	CNKSR1	0.812166480638542
53	PTPRK	0.811818233383121
54	BAIAP2L1	0.811780469423406
55	HMCN2	0.809365985432553
56	PUS7L	0.806460785574215
57	GRIK5	0.806400118856822
58	CADM2	0.805043238901796
59	ZG16B	0.804843440159804
60	SLC7A10	0.803952554900974
61	KRT23	0.803025275834615
62	DPYS	0.802213001383126
63	LRCH2	0.801966966837443
64	CAMK4	0.801016307075428
65	MRPL46	0.799817476566328
66	GAS2L2	0.79960396039604
67	FAM166B	0.799562607055423
68	COL6A6	0.796297059946529
69	ANKRD53	0.794477468297159
70	C14orf180	0.791965388168373
71	ZNF34	0.791884472982276
72	M1AP	0.791187677322553
73	ADA	0.791028006386091
74	CD2AP	0.791007347081292
75	SNAPC4	0.78993195949325
76	TCF15	0.789354891248615
77	TMEM132C	0.781587074688867
78	TEX261	0.780453814620219
79	LCN10	0.779704760304085
80	KAT6A	0.779089955837741
81	PFKFB1	0.774355323937576
82	POP1	0.773901931344138
83	OR51E1	0.772446877111808
84	COX14	0.771147243381014
85	ETFA	0.769573614618927
86	ABCD2	0.768967955594684
87	LIPE	0.768942935895709
88	PLEKHA7	0.768413967358849
89	IPO13	0.767414657641463
90	ANGPTL5	0.767370778114551
91	GATA3	0.767328789543422
92	MAGEF1	0.767328227752661
93	BACE2	0.766428493511202
94	TM6SF1	0.766006547792195
95	BIK	0.764998318822169
96	STIM2	0.764807690567889
97	CIDEA	0.764778849987063
98	IRX3	0.764582513650371
99	TFAP2B	0.764159354338773
100	CALB2	0.763895706244046
101	INSIG2	0.761475447066399
102	AQPEP	0.761319525089239
103	TRABD2A	0.76131472697992
104	CLDN3	0.760884793563027
105	ZNF507	0.759936653680834
106	TFF1	0.759323263008407
107	RHOV	0.75893405729341
108	CLEC10A	0.758665308564387
109	SMIM22	0.758609244603607
110	DFNB31	0.758152349253637
111	HRASLS5	0.756703698793745
112	CAPN13	0.75651282051282
113	C10orf128	0.75561312400154
114	SLC7A4	0.755374495322938
115	KIF9	0.755197002314941
116	BMPR2	0.755061011836593
117	ZFHX3	0.752879588445662
118	TLR4	0.752564827884616
119	LGALS12	0.752304795913519
120	ZMYND15	0.751484477694737
121	ENKD1	0.751400557654225
122	PDE2A	0.751240788806138
123	PRIMA1	0.75099330262339
124	FOXA1	0.750096606394277
125	ALX4	0.747727858590151
126	ABCG2	0.747612441498191
127	C14orf28	0.747276926982091
128	ST6GALNAC1	0.747088934754542
129	NENF	0.746987122147285
130	FABP4	0.745794454730241
131	TDRKH	0.745777247351712
132	EGFL6	0.745668153893667
133	FAAH2	0.745600425516391
134	ZNF496	0.745450954946822
135	LDLRAP1	0.745260056542414
136	SLC25A18	0.74465480771654
137	KIAA1324	0.7441362399322
138	CTD-2210P24.4	0.743396710103538
139	KLHDC10	0.743045519824602
140	SDK1	0.742569264249363
141	MAPK12	0.74232341804929
142	SPATA6	0.740961215886307
143	SPIN3	0.740857644769743
144	EPS15	0.740484143947871
145	TAL1	0.74017426175504
146	EMX2	0.738986014351486
147	PRLR	0.73866000832293
148	PTH2R	0.738134887593672
149	IRF5	0.737869951475605
150	RP11-1070N10.3	0.73747787149849
151	RRAGC	0.736665578311656
152	IKBKB	0.736130370731448
153	GPR64	0.734654281068886
154	C1QTNF4	0.733947502196666
155	PROK1	0.733657797058694
156	KCNAB1	0.733376763764734
157	CCDC88C	0.733203621434065
158	WSCD1	0.732582432353071
159	RFC1	0.731782093112608
160	HOXB7	0.731108185919732
161	CTSZ	0.73096985229088
162	GALNT13	0.730222750459708
163	C1orf54	0.728568558625944
164	TSPAN1	0.728041988963737
165	SDHB	0.727025022633385
166	LMX1A	0.727005459890802
167	IP6K3	0.726875290018691
168	COL17A1	0.726193500135434
169	BCL7B	0.725766436896306
170	GCDH	0.725409267843809
171	PRR26	0.724438632546953
172	TNMD	0.724192360307271
173	TLL1	0.724001774962388
174	SLC38A11	0.723438010491463
175	LPHN3	0.721621156145469
176	NAALAD2	0.720564151546285
177	FCN2	0.720557197129591
178	SSR2	0.720195438124032
179	CCR5	0.720192026754764
180	HOXB6	0.71933144675478
181	ZAP70	0.71918113203621
182	GATAD2B	0.718487654839044
183	MAP7D1	0.718086403427421
184	TF	0.717843160296527
185	ACSS3	0.717675269726361
186	SLC12A7	0.715406181510381
187	KIAA1033	0.71478628477691
188	RFX3	0.714496597354225
189	SPP1	0.71411828442068
190	XRN1	0.713918875446296
191	SLN	0.713533350888479
192	HDGFRP3	0.713490821925974
193	GHRH	0.712677850923763
194	GGT7	0.712150490382374
195	ADRA2A	0.711749962190028
196	SLC52A3	0.710747666865135
197	SPATA7	0.710271497659634
198	TMC4	0.710232455960111
199	DNAJC12	0.709567532314093
200	PEX6	0.709309278205674
201	CRAT	0.709300157087685
202	MAST4	0.709248478052578
203	CCDC85A	0.709192271558971
204	PTPRQ	0.708928899367087
205	COL4A6	0.708557504452357
206	MMP7	0.708119834959039
207	PENK	0.708027735825836
208	PHOSPHO1	0.707797745513272
209	ENOX1	0.706980052742791
210	OLFM4	0.706700176626412
211	NTM	0.706287232985646
212	IRX5	0.706199494969939
213	PEX5	0.706085850872805
214	LIPN	0.704821801445884
215	PTPRM	0.704688199323435
216	PLIN1	0.704399916516822
217	KCNB1	0.704175050257988
218	TFEC	0.703225883613466
219	C1orf159	0.702946889950148
220	ADIPOR2	0.702819010635029
221	ZNF775	0.702805558188635
222	ABCC3	0.702173189340116
223	SLC26A7	0.700848227411242
224	FXYD3	0.700698171040429
225	SOX18	0.700320573242354
226	FRMD3	0.700264273606608
227	CAT	0.69994276905358
228	RASGRP1	0.699468668745885
229	ACYP1	0.699272319138973
230	SF3B5	0.699253562642549
231	IL1RL2	0.699004088951709
232	STON1	0.698794652013491
233	SPRED2	0.698748825049673
234	CHN1	0.697828956041801
235	ROBO4	0.69771691451987
236	MYO5C	0.697701400534533
237	CYTH1	0.697522111814633
238	CLTB	0.697505892473777
239	DLK1	0.697483058628077
240	MCM10	0.696807011483077
241	AKAP11	0.696385520696183
242	SAMD14	0.696179888016612
243	GYG2	0.695232973342076
244	ANKAR	0.695082739383771
245	ZBTB20	0.694995230860187
246	KL	0.694858703859445
247	NTSR2	0.694800301431801
248	MYOM1	0.694780708860566
249	TMEM176A	0.694639570387912
250	PCDH9	0.694243025546574
251	CEPT1	0.694228826279277
252	GFRA2	0.693923239629231
253	CRHBP	0.693443416640537
254	ZNF469	0.693374113470552
255	PTK2	0.69319838725502
256	CPNE2	0.693039373562957
257	POFUT2	0.692070217016915
258	WNT2	0.692034436494929
259	TRAF3	0.691966446800698
260	GPR98	0.691842900302115
261	IGSF9	0.691606126024699
262	FMNL1	0.690730576985347
263	NUP98	0.690354872177744
264	PIP5K1C	0.69027953105718
265	PGAP1	0.690084047164205
266	SLC4A4	0.689862195827386
267	B4GALNT1	0.688094137216458
268	C11orf52	0.68717205346065
269	PIP4K2A	0.68706689586849
270	ZNF205	0.686876964240626
271	CHRD	0.686357232961667
272	PC	0.685821641090901
273	ZNF25	0.68558184707811
274	CDC14A	0.685500985229653
275	CTNNBIP1	0.685346327533962
276	MRGBP	0.685220399424511
277	MFSD6	0.684487630726721
278	CYP4X1	0.684419836143944
279	GSC	0.683904229250018
280	TMEM87B	0.683745812018783
281	PDHB	0.683656676218425
282	WSCD2	0.683023543509068
283	AGPAT2	0.682940389438917
284	TNFSF8	0.682533420666545
285	ZDHHC7	0.6825264746338
286	TTC37	0.682241149177455
287	CLDN1	0.682142149669491
288	SERPINB5	0.681037138620659
289	PTPRN2	0.680602230266181
290	CWF19L2	0.679912421330353
291	SERINC2	0.679479522344645
292	SOX10	0.679303858162891
293	TFAP2A	0.679193350168501
294	WIPF3	0.679183511675752
295	SELL	0.679001585004867
296	SLC1A7	0.67859115184518
297	STAC3	0.67827732450862
298	NPY1R	0.678262477551093
299	AR	0.678179032916809
300	CD52	0.677920424468588
301	MRPL14	0.677612572874974
302	YBX2	0.677488628782738
303	HIGD1B	0.677488258030658
304	TNFRSF8	0.677154543118628
305	AQP9	0.676832045195378
306	NINJ2	0.676150704917988
307	PLEK	0.675983179670895
308	ANKRD13B	0.675924151652799
309	WDR66	0.675225114768856
310	GPR3	0.675116828535844
311	GRHL2	0.674464690652643
312	ZDHHC18	0.673986196573449
313	EXOC6B	0.673952504499209
314	DOK2	0.673340365256106
315	C9orf40	0.673325247456629
316	NEK10	0.673070288574636
317	C17orf96	0.673011733761395
318	ESYT1	0.672904072891427
319	OXT	0.6727969348659
320	AMPH	0.67207458106825
321	RNMT	0.671743113082014
322	TNK1	0.67171086235393
323	BST2	0.671535947286881
324	MRPL18	0.670332784358589
325	ASPHD1	0.670310407561491
326	FOXF2	0.670243181866683
327	ZNRD1	0.668608258290347
328	FAM184A	0.668387766442222
329	MATN3	0.666438396440425
330	PACSIN2	0.666346145812684
331	SIGLEC1	0.665848176982543
332	ENPEP	0.665528394562398
333	P2RY13	0.665499018919452
334	FSIP1	0.665272138081173
335	ARHGAP20	0.665266405226932
336	CD7	0.665216362726279
337	LRBA	0.664749033418545
338	FHL3	0.664522555966251
339	DNMBP	0.664468762887375
340	DHDDS	0.664198685614016
341	GPAM	0.664186876184134
342	EFNA5	0.663796996577043
343	ATOX1	0.663670842769619
344	APH1A	0.663526964434086
345	ARHGAP8	0.663418696165179
346	ANAPC4	0.663269534262108
347	APBA1	0.662846551596511
348	PLA2G16	0.662699243378222
349	TREM2	0.662230884229793
350	SLC24A3	0.662216685029117
351	SLC39A11	0.662048987193465
352	TRPC1	0.661958952618322
353	EIF4G1	0.661821317687276
354	MMP17	0.66174212435893
355	RPS6KL1	0.661739446451892
356	HRC	0.661684448743553
357	SLC15A3	0.661154307595335
358	HEG1	0.66075249160967
359	B4GALT7	0.660333076035727
360	KCTD13	0.660183981156178
361	MSR1	0.660098622062546
362	AGAP1	0.659993769733775
363	ENPP2	0.659805816233613
364	FAM188B	0.659556946096513
365	POLN	0.658980859988574
366	ANKRD24	0.658918920699177
367	SLC7A2	0.65828218968767
368	LRRC26	0.658176499717518
369	CCR1	0.658088337507511
370	ARHGEF9	0.657800972862439
371	FAM69B	0.657643518121724
372	SGCG	0.657627159885817
373	EDN1	0.657311545774369
374	LRP11	0.657091489400637
375	CCL20	0.656767932472834
376	MKX	0.656541419670011
377	ZNF132	0.656524252885989
378	SCGB2A1	0.656462790501125
379	NPY2R	0.656123781134332
380	CRYBB1	0.656024830950006
381	ALDH1A2	0.655712932743897
382	GPR173	0.655593346427072
383	STARD3	0.655203888225111
384	STAT4	0.655140933720434
385	ARHGAP40	0.655112829090091
386	RCL1	0.655020286143962
387	PRKAR1B	0.655006788704967
388	COL11A2	0.654673949597203
389	TRIM9	0.65462041084114
390	COL4A3BP	0.65445362276626
391	CHADL	0.654312983797063
392	AMFR	0.653972545148505
393	GIT2	0.653910671044952
394	PRCP	0.653715233723642
395	TBXAS1	0.653450201656992
396	VASH2	0.6534088350437
397	RXRB	0.653247547682701
398	RHPN1	0.653100602518632
399	MGAT2	0.653015313292978
400	NKX3-1	0.652663324339967
401	HMGA2	0.652598426656865
402	CABP1	0.650919077958069
403	CCDC178	0.650915293185225
404	MSI2	0.650704889641122
405	ZNF624	0.650337062148326
406	LMOD1	0.649632594646634
407	WDFY1	0.649421214926704
408	SPEN	0.649320100284715
409	MATK	0.648924438080256
410	CD180	0.648356846113291
411	IGFBP3	0.648185385980905
412	SCN4A	0.64817094909003
413	ZNF792	0.647674420328518
414	DCAF15	0.64735171521696
415	HMCN1	0.647043527163418
416	CDK5	0.646757206410175
417	PTRHD1	0.646706755644583
418	LHX6	0.646684282552451
419	GMPPA	0.645975574919758
420	TWIST1	0.645784855777093
421	IGJ	0.645498822590289
422	SELP	0.645365274299053
423	TBX15	0.645081998918222
424	LOXL2	0.644938999541861
425	SPINT1	0.64470297775362
426	DDX60L	0.644436924588755
427	ESR1	0.644183602016368
428	ADORA1	0.643740980212172
429	BACE1	0.643395615177008
430	CYP2E1	0.643245901366914
431	ADRA2C	0.643216049391423
432	SLC1A1	0.643206557070924
433	TMEM37	0.642591293803254
434	CTD-3193O13.9	0.642420264021932
435	MYRIP	0.641925707733686
436	PPM1H	0.641833262586396
437	PHLDB2	0.641453210004309
438	ZNF644	0.641438475428461
439	MMP2	0.641279999397692
440	NTS	0.641264148828869
441	KIF19	0.641119412729717
442	C9orf152	0.640984171920928
443	ZNF678	0.640779761261658
444	CSN2	0.640502354788069
445	PKHD1L1	0.640001209970064
446	FBXO21	0.639994317139509
447	P2RX6	0.639986967148519
448	TMEM260	0.639923173466805
449	CENPV	0.639528372449717
450	CCBL2	0.639008968228847
451	CGN	0.638960300502595
452	TRIM28	0.638907943763946
453	LRRC17	0.638281189635459
454	TMEM9	0.638245972366899
455	CXCL9	0.63805837374623
456	SCNN1D	0.638016632014434
457	EIF2D	0.637534520716021
458	ISLR	0.636202039883975
459	RASGRF2	0.636193096548274
460	CMYA5	0.636139593940178
461	WHSC1L1	0.635975932816108
462	CNTROB	0.635907681539421
463	MS4A14	0.635693844705497
464	C11orf30	0.635567783672472
465	NTRK2	0.63549576995515
466	PTPN6	0.635385186980789
467	CMC1	0.635096660739262
468	MYEOV	0.634733950868394
469	DPP4	0.634695776521616
470	RPGR	0.634336325640715
471	SPON2	0.634179191080658
472	EPB41L1	0.634014020705751
473	TCF25	0.633926498174171
474	ASAH1	0.63379409907547
475	HN1	0.633629761755449
476	WDR48	0.633248230737359
477	FAM3D	0.633167075064421
478	MFHAS1	0.632804380698631
479	CLMN	0.632659981066206
480	AMN	0.632616217557382
481	MAP3K12	0.632497847074287
482	LRRC42	0.63249604767132
483	SLAMF1	0.631928861758006
484	MMP24	0.631706986697473
485	GIPC2	0.631647275929181
486	MCTP1	0.631283727335834
487	CNRIP1	0.631202856922271
488	PRSS36	0.63073707476061
489	LPAR2	0.630488452275633
490	EVC2	0.630302974648599
491	FAM198B	0.630189868872781
492	ENDOD1	0.630170410597582
493	MANEAL	0.629972390855706
494	ACAD10	0.629373985832588
495	WFDC2	0.628713965054155
496	VIP	0.628437974974083
497	GAA	0.628429736777064
498	GNAZ	0.628353177528347
499	FAM162B	0.628186604837051
500	DCLK1	0.628036349550982
501	REG1B	0.628024766223269
502	HECW2	0.627998918074118
503	NPL	0.627796794247543
504	SPAG17	0.627453776200216
505	ANGPTL7	0.627049016250795
506	HDC	0.627008471593956
507	PAPD5	0.626763257721937
508	TET2	0.626753946175007
509	TBX21	0.626407496360362
510	VPS52	0.626196453160952
511	PNLIPRP1	0.626021477753164
512	ELF4	0.626006816389311
513	SF1	0.62591089662593
514	KANK4	0.625680817805883
515	WDR18	0.62515823139589
516	BCAT2	0.624447681627931
517	RXRG	0.624205275868378
518	KIT	0.623963322586056
519	TIFA	0.623775451666444
520	TBCD	0.62374440869705
521	ZNF385D	0.623517642463607
522	AGO4	0.623448467994289
523	MARC1	0.62333763064801
524	TK2	0.623189080273553
525	BARX2	0.623158798680173
526	ADORA2A	0.623008337814681
527	PNLIP	0.622783291163095
528	C6	0.62257912467248
529	MGAT4B	0.622538328137037
530	ATP2B4	0.622134649777181
531	CCM2L	0.621517459891436
532	LRRC8C	0.621508440425417
533	LRMP	0.621241967759782
534	SMTNL2	0.621010538869336
535	GABPB1	0.620578769237751
536	ABHD6	0.62057006854114
537	HRCT1	0.620407377662533
538	CCR7	0.620371908621803
539	HSPA12A	0.619768740108769
540	KIAA1468	0.619524522196158
541	BAALC	0.618713014488321
542	CENPW	0.618359210068223
543	MBD2	0.61816285625877
544	CSTA	0.618123450930422
545	EHF	0.617836786018573
546	TMEM121	0.617799676196668
547	AVPR2	0.617577540070141
548	NTRK3	0.617390344206129
549	SFMBT2	0.617155053161868
550	ATP10A	0.61714702409187
551	NOVA2	0.617089792436153
552	NMB	0.616797589698945
553	CYC1	0.616744704464236
554	GJA5	0.616088769194914
555	GPR133	0.615990706191327
556	PYGL	0.615875825445313
557	IGF2	0.615798677410082
558	SYT7	0.615526867388046
559	KCNIP2	0.615334085389872
560	THRSP	0.615307059773592
561	FBP1	0.615212944020829
562	GZMK	0.615203455678991
563	PDIA5	0.614988378925621
564	SSTR2	0.6149569539866
565	TCEAL8	0.614623187342993
566	DNASE2B	0.614154528367265
567	SCG2	0.613825716584706
568	PWWP2B	0.613705431129071
569	ZCCHC3	0.61311772182904
570	LIFR	0.613046917170181
571	KIF12	0.612600889987962
572	GLI4	0.612463124721559
573	CARKD	0.611974505596276
574	ARL13B	0.610767170668246
575	STAC	0.610584297085792
576	JAGN1	0.61046622733233
577	EOMES	0.610319956698796
578	HELQ	0.609597626620026
579	FBXO31	0.609294373611234
580	CFP	0.609266397692506
581	DAB1	0.609240214358118
582	MLIP	0.609199749695401
583	FGGY	0.609020757243691
584	RNF180	0.608916922434773
585	FAM47E-STBD1	0.60883043199458
586	FGF12	0.608763866376804
587	SLC25A48	0.608601839868145
588	KCNMA1	0.608581977974973
589	BATF	0.608549296134742
590	GATAD2A	0.608533123946437
591	GPR174	0.608489431311544
592	NDRG4	0.607672857653397
593	HOOK1	0.607672820316618
594	RNASE1	0.607350633759601
595	LY9	0.606920000519662
596	JAM3	0.606722639103799
597	MARCO	0.606572197884485
598	COQ3	0.606365895742508
599	TFAP2C	0.606348083047233
600	CBR3	0.606117556878959
601	MACROD1	0.606091757151313
602	TLN1	0.605860792230264
603	DUSP23	0.605677089933794
604	ITGA1	0.605550696337058
605	CTTNBP2NL	0.605529871291061
606	FARS2	0.60543084638152
607	FGF1	0.605287355431093
608	GYS2	0.605129912669961
609	HPGD	0.604786423978399
610	ROMO1	0.604717400960775
611	MCM6	0.604639086237848
612	MASP1	0.604620926739096
613	NRCAM	0.604546686238625
614	QSER1	0.604476618150299
615	RRP1B	0.60446637242283
616	ATP6V0B	0.603919697759168
617	RP11-986E7.7	0.603719502115946
618	GRHL1	0.603425398455717
619	ADRBK1	0.603306395230175
620	PHB2	0.602770878104853
621	TMEM25	0.602628487135724
622	DNAH5	0.602148162604961
623	LRRC16A	0.602138865713998
624	MYO7B	0.600902601140769
625	S100B	0.600686272904131
626	TREH	0.600646352723915
627	PLCB4	0.600397996709762
628	POLE4	0.600373622899365
629	PHF2	0.600334325958675
630	PVRL4	0.600076545803135
631	CDKN2A	0.599983301491946
632	ETV3	0.599801905480615
633	CPLX1	0.59977096181409
634	SLC17A7	0.599756346962589
635	RHOBTB1	0.599424195979245
636	SMARCAD1	0.599412377087146
637	CCT4	0.59931568400732
638	SLC2A9	0.599156286012715
639	PTPN5	0.599152811980672
640	PDE3B	0.599019319955368
641	LRRC1	0.599003727840886
642	CDK1	0.598880372033452
643	ZNF296	0.598520680140658
644	PMM1	0.598508723756
645	CYB5A	0.598272499394597
646	LRP1B	0.598032052930269
647	RAB30	0.597738810726771
648	GPIHBP1	0.597559534094625
649	GLT1D1	0.597516210069766
650	MMP27	0.597363154001513
651	CDK19	0.597257989875546
652	DHX58	0.597092164805952
653	ARHGEF26	0.596792578596349
654	CLIC5	0.596208603747524
655	ZNF623	0.596112259177456
656	WDR86	0.595908122976506
657	PREX2	0.595720603299332
658	HID1	0.595609274677324
659	CD5	0.595483946703462
660	PCK1	0.595389506223141
661	NAGA	0.595371448081498
662	EPS8L1	0.595370802998654
663	CCAR2	0.594906426969884
664	ZNF438	0.594794003537197
665	NFATC2	0.594739231570024
666	ARL6IP4	0.594550751538275
667	MTMR11	0.594313068198541
668	ZNF865	0.594311879191589
669	AURKB	0.594196474160318
670	NEBL	0.594094474543095
671	AGTR1	0.594055180671032
672	STXBP2	0.593352923364473
673	NAV2	0.593255258724297
674	SLCO2B1	0.593233399050917
675	MT3	0.593067475373265
676	STX12	0.593013575494112
677	SCN4B	0.592698978902799
678	DMD	0.592367114029546
679	TCTEX1D1	0.592255451114294
680	SNAP25	0.591702282070037
681	R3HCC1L	0.591511195511881
682	ALAD	0.591416914022184
683	SLC25A22	0.591267651275853
684	LRFN5	0.591231140691007
685	KIAA0430	0.590833325980553
686	SPHK2	0.590329567247171
687	AFAP1	0.590258315289567
688	CMKLR1	0.590013008186
689	STX19	0.589561546788277
690	KCNE1	0.589525904714564
691	TMEM252	0.589518225777266
692	SIK3	0.589449309744824
693	LTA4H	0.589180266562653
694	IL20RA	0.589126664883713
695	SIDT1	0.589069425592349
696	ROR2	0.588903561913212
697	GUCA1B	0.588720858368823
698	FAM228A	0.588640840568677
699	ARNT2	0.588522485658801
700	ITGB7	0.588272489531372
701	AL807752.1	0.588260722020777
702	KIF26A	0.587925585060416
703	EPB41L4B	0.587857861576173
704	ATF5	0.587760497531449
705	IPCEF1	0.587634959966291
706	LAMA1	0.587158011457644
707	MEF2A	0.587118720876058
708	DGAT2	0.587089412674844
709	S1PR4	0.586933042193115
710	CTXN1	0.586891630283041
711	GNAI1	0.586871322707959
712	CAPN8	0.586545925985011
713	DNAH9	0.586483562219851
714	CALCRL	0.586334141735884
715	EPCAM	0.586289612568783
716	C11orf35	0.586245402907785
717	C1orf204	0.585999819815458
718	POU2F1	0.58583650120489
719	WARS	0.585683089298136
720	TSSC1	0.584925466365816
721	MMP25	0.584913992990009
722	TNP1	0.584898271127939
723	ACACA	0.584850784926795
724	CTC-429P9.4	0.584837693477071
725	CNTD2	0.584717544404444
726	FAM101A	0.58467074724773
727	AQP5	0.58432691840935
728	BCHE	0.584307627974794
729	ZNF146	0.584096485193595
730	E4F1	0.583788018634105
731	RASSF5	0.583708328196026
732	MPP3	0.583621829983764
733	FKBP1B	0.582789744121637
734	HSD17B6	0.582701899218993
735	COL9A3	0.582632101490357
736	ATPIF1	0.582417962672979
737	PRRT4	0.58240567933809
738	ANO9	0.582245319556377
739	PLA2G1B	0.582009028768018
740	IL10RA	0.581624561623417
741	MAP2K6	0.581320306663379
742	LONRF2	0.581156500509858
743	DCBLD2	0.581046522192686
744	PCED1B	0.580889380397917
745	TSPYL4	0.580884679801485
746	MROH7	0.580821573255867
747	ENDOU	0.580582711444334
748	PCGF2	0.580564319710345
749	CA4	0.579908982713762
750	CYP1B1	0.579893100844108
751	AK5	0.579709068883761
752	DNAJB11	0.579362744691667
753	RSPO1	0.579276589936374
754	MTA3	0.578784048836047
755	RUFY3	0.578318515628572
756	HCK	0.578024942001834
757	GPR87	0.577625531582132
758	FAM149A	0.577404386475148
759	PEAR1	0.577228464199071
760	DDO	0.577133349774116
761	ESRP1	0.577131457843799
762	LRP5	0.577008591010966
763	TYROBP	0.576897439503923
764	DLX5	0.576744874510941
765	PSD3	0.576244293160641
766	ST6GALNAC3	0.575848822412335
767	ORMDL3	0.575848289620056
768	PRKCZ	0.575817996947716
769	DIRAS1	0.575690401426555
770	MYO7A	0.575610267813724
771	C5orf63	0.575469051537727
772	AMPD1	0.575208824966158
773	INPP1	0.574769019283376
774	FAM65B	0.574715698129955
775	ETNK2	0.574621443913237
776	DMRT2	0.574439587449362
777	PRSS50	0.573967027230179
778	CRIP3	0.573940102145961
779	PLA2G7	0.57385333469301
780	APRT	0.573780049973674
781	FAM173A	0.573710007581194
782	AKT3	0.573657493563266
783	PCNXL2	0.573507461036208
784	FAR2	0.573308166254906
785	GALNT12	0.573170324014235
786	COL18A1	0.57244887918136
787	ANKRD29	0.572165345981067
788	EHHADH	0.571871369427352
789	WDR46	0.571606701892958
790	MGAT1	0.571303326998196
791	SGK223	0.570725234660102
792	NRXN3	0.570713644547724
793	ARHGAP36	0.570346129970648
794	CYP4F22	0.570144557603825
795	CORIN	0.570126846977723
796	SPIN1	0.570090272755184
797	ZNF605	0.57006145968855
798	IQGAP2	0.569649251376798
799	C5orf38	0.569608277219638
800	REG1A	0.569479031933774
801	UQCRQ	0.569336700141271
802	TRPS1	0.569204876750268
803	ZFAND1	0.569070795626001
804	OSGIN1	0.568762605462007
805	BCL6B	0.568586883242337
806	SFRP5	0.568550605405292
807	PRSS8	0.567680245811004
808	ZBTB46	0.567637250317664
809	CD86	0.567516938130747
810	FER	0.566867211178446
811	ZNF362	0.566755911215656
812	SPEF2	0.5665373298116
813	FES	0.566375840579945
814	KIF17	0.566240338104899
815	TACR1	0.566216621440347
816	SYT8	0.566199268498659
817	NNAT	0.566132264529058
818	SEMA3C	0.565868293111852
819	FKBP15	0.565546287746634
820	VPS13A	0.565487277229251
821	PRRG3	0.565450914035416
822	C12orf39	0.565383702198119
823	ASB13	0.564908567258608
824	SLC43A1	0.564744640594545
825	FYB	0.564511896015726
826	ORC5	0.564352382579346
827	MFAP3	0.564174355240765
828	PYROXD2	0.564031560213672
829	LHCGR	0.563847429519071
830	LALBA	0.563507109004739
831	GNG2	0.563434279982573
832	CLDN8	0.563279720025711
833	ELOVL3	0.562991198221384
834	ZFP1	0.562985896701248
835	PLEKHA8	0.562089008108637
836	SNX20	0.562001934545626
837	LINGO1	0.561963830732853
838	MCOLN3	0.561898910310464
839	SMURF1	0.561779935352638
840	SNAP47	0.561707566156841
841	NRROS	0.561536538211073
842	CORO1C	0.56150969088993
843	MKL1	0.561391214847398
844	TPST2	0.561157263716456
845	MAPK13	0.56114685469919
846	SUPT20H	0.561024970062946
847	ADAT2	0.560668632155211
848	SLC35G1	0.560356374872575
849	GORASP1	0.559931050923403
850	VAMP8	0.559640533482877
851	SH3RF1	0.559538981560924
852	TSPAN2	0.559474356189724
853	GIMAP8	0.559417747514554
854	SLC16A7	0.559208939138455
855	PTX3	0.559083668828719
856	SCN7A	0.559005119441838
857	ACD	0.558972069746529
858	PADI2	0.558943056551361
859	CDO1	0.558919985433139
860	SUFU	0.558889348743689
861	SBK3	0.558661000826967
862	FAM19A5	0.558647617800835
863	TNNT3	0.558619634180483
864	GFAP	0.558435761132904
865	MAPK10	0.558285873904518
866	ZBTB18	0.558237676542391
867	ZNF22	0.557894085786885
868	TMEM139	0.557417673934652
869	CLTCL1	0.557115110988579
870	L1CAM	0.557060277679424
871	LPL	0.556839463636291
872	DEGS2	0.556697438101408
873	ABRACL	0.556542943619701
874	MSC	0.556498265456926
875	TACSTD2	0.556452911931891
876	SOSTDC1	0.556360861694192
877	CCRL2	0.556286339281372
878	DCSTAMP	0.556270141852471
879	RALGAPB	0.556046160048264
880	TUB	0.555987123731368
881	C2CD2	0.555881975303751
882	MPP1	0.555748925643252
883	SMOC2	0.555675857759721
884	SYNGAP1	0.555645178359657
885	TMEM184A	0.555424375594806
886	MAOB	0.555283943411389
887	TMEM214	0.555232698525302
888	ETNK1	0.55521278369814
889	TSNAXIP1	0.555064994635973
890	RAI2	0.554560399358501
891	ARHGAP6	0.554250677986779
892	AP3M2	0.554109069520734
893	ACTR1B	0.554025519397947
894	NTF3	0.553884217582566
895	KLHL31	0.553830509100078
896	PLXNA4	0.55303646843066
897	SYCN	0.552913560690503
898	SERPINA5	0.552476573592355
899	C7orf63	0.552429025916474
900	CISD3	0.552207501714789
901	TEX2	0.551792792641042
902	CSDC2	0.551503432086869
903	C16orf74	0.551482686922375
904	DLG5	0.55135147816228
905	PARP16	0.551310314819234
906	KIAA0195	0.551196149859531
907	C1orf172	0.551161132218416
908	ACSL5	0.551158481649072
909	PPFIA3	0.55092023294183
910	CDC42BPG	0.550655171563739
911	CREB3L1	0.550582825439473
912	KCTD14	0.55052118828695
913	ZC2HC1A	0.550451025735679
914	ECHDC3	0.55032866944006
915	L3HYPDH	0.550219470224347
916	SYNE3	0.549817493614631
917	VNN2	0.54964366605011
918	AGRN	0.549551123485801
919	SH2D2A	0.549403733719443
920	ADC	0.549322627611682
921	GUCY1A2	0.549263977253637
922	DLG3	0.548810382722812
923	DUSP26	0.548698500180359
924	EPHA1	0.548690642463591
925	TCF7L2	0.548538678929849
926	ADRB1	0.548487419123451
927	AC139100.2	0.548404128529689
928	DEDD2	0.548103866634059
929	GATA5	0.547920288515882
930	SERP2	0.547785050176105
931	TMEM61	0.547376505792739
932	C1orf233	0.547374897636784
933	SPTBN4	0.546876395510905
934	PROCR	0.546855483663283
935	GUCY1A3	0.546720445684589
936	DYM	0.546657288607345
937	NEDD4L	0.546625892707304
938	MAN1A2	0.546596207793818
939	TMEM51	0.546532291159485
940	FZD10	0.546385804570364
941	WAS	0.546330319767276
942	ITIH3	0.546321896293139
943	LRRCC1	0.546261527564716
944	AFTPH	0.54619704856795
945	PDGFB	0.546093203047927
946	TPO	0.545942855183994
947	CNIH2	0.545722744701246
948	S100A14	0.545515289600621
949	CBLC	0.545470919179413
950	MBD1	0.54538347772127
951	PTGER2	0.54482772906746
952	VASP	0.544766823341039
953	FAM110A	0.544393810113616
954	CLEC4G	0.544246658110831
955	FBRS	0.544112368619502
956	COCH	0.544022661571765
957	IL2RG	0.543833997027093
958	ARHGAP31	0.543704598929273
959	WT1	0.543664103293389
960	TMEM71	0.543473764036334
961	MBOAT7	0.54344850131786
962	SORCS2	0.543402832581878
963	OLFM2	0.543384538585464
964	RPS5	0.542753629627855
965	PHF14	0.542747805879186
966	SLC5A6	0.542678217659067
967	CCL7	0.542664290370179
968	YIF1A	0.542611004219174
969	CD70	0.542570548123314
970	PHOSPHO2	0.542031110956918
971	SERTAD4	0.541989587038585
972	FANCM	0.54125793330417
973	TCTEX1D4	0.540997402431815
974	SDHAF1	0.54069092951595
975	BATF3	0.540633933561759
976	FOXRED1	0.540633074719955
977	FIGF	0.540428982193527
978	ARAP2	0.540196799717999
979	COL1A1	0.540139925899197
980	DENND2D	0.53988881247254
981	IPO11	0.539693149294006
982	IGSF21	0.539669099964591
983	GCKR	0.539551122922986
984	SLC52A2	0.539514652036352
985	NPTN	0.538856146027033
986	CDC42EP5	0.53878340214917
987	RASA3	0.538660491584207
988	HPGDS	0.538525032663181
989	MUC16	0.538468747071502
990	C3AR1	0.538088296448213
991	OMG	0.538013929999483
992	MINA	0.537961518947931
993	GPATCH2	0.537860224482481
994	UGP2	0.537674916640246
995	CAPN7	0.537663734691237
996	DXO	0.537201777386695
997	PAG1	0.537164986785821
998	PAXBP1	0.536741456938802
999	GPBP1L1	0.536675972218824
1000	NUSAP1	0.536667169891884
1001	ZNF184	0.536662737895535
1002	ATRAID	0.536445068080478
1003	HOXB2	0.536298586566494
1004	CSRNP3	0.53627912592056
1005	ATP6V0E2	0.536237526343678
1006	GNAO1	0.535904713683483
1007	GPD1	0.535636319259081
1008	SLC29A3	0.535600225232941
1009	C15orf41	0.535188496963379
1010	FBL	0.534851774033978
1011	FMO1	0.534837705569257
1012	SDC1	0.534801371245195
1013	FST	0.534717457618334
1014	ANGPT4	0.534680849122633
1015	MIS18BP1	0.534625744025201
1016	AADAC	0.534499861224125
1017	NRG2	0.534392196098049
1018	MAB21L2	0.534227313606326
1019	KERA	0.533978234582829
1020	TRHDE	0.533687821174571
1021	TIAM1	0.533509764473759
1022	GRB7	0.533343053858069
1023	ATP2B1	0.533228117402335
1024	AP2S1	0.533071528220976
1025	SPOCD1	0.532666014819762
1026	FAM13A	0.53261331309441
1027	MAP3K5	0.532484813422042
1028	KRT79	0.532305441041239
1029	MRPL33	0.532216084075977
1030	WAC	0.532185661701831
1031	FEM1B	0.53208421649114
1032	COX7A1	0.532048628734855
1033	CLPTM1L	0.531798060204854
1034	CELSR1	0.531349488818734
1035	C12orf5	0.53114713698682
1036	ZMYM2	0.530987736492759
1037	NGF	0.530828713751069
1038	ALPK3	0.530810984490065
1039	GYLTL1B	0.530727289318722
1040	THBS3	0.530514023855399
1041	NGFR	0.530503401577713
1042	LRP4	0.530456391387504
1043	TBX3	0.530392521285044
1044	CCSAP	0.530373896453612
1045	CA2	0.530347574344171
1046	PISD	0.530234433178098
1047	DTNB	0.529849523468963
1048	ADAMTS3	0.529849381816837
1049	HLX	0.529725840239065
1050	MT1F	0.5296060190626
1051	DGKG	0.52918610159372
1052	PMP2	0.529001225491488
1053	EBP	0.528722476042615
1054	BCL2L1	0.528682526722681
1055	RNF166	0.528122832220074
1056	CD36	0.528034019573533
1057	DIO1	0.52779336235171
1058	PRDM11	0.527678756021666
1059	ZNF32	0.52760846969932
1060	HSPBAP1	0.527509135081171
1061	PPP6R2	0.527501282988044
1062	ACVR1	0.527456321098745
1063	DACT2	0.527289403314774
1064	EBF2	0.527136879631765
1065	NUP85	0.526956328386024
1066	SORL1	0.526927508485773
1067	BARX1	0.526876744043906
1068	HRSP12	0.526589002052897
1069	LAPTM5	0.52587932691366
1070	BAI1	0.525854773802737
1071	CITED1	0.52584961055735
1072	FJX1	0.525844751788888
1073	FAM180A	0.525837278653345
1074	HIST1H3H	0.525787827542055
1075	KLK6	0.525646118107794
1076	CA9	0.525535188963018
1077	C15orf61	0.525440982037416
1078	TJP3	0.525279733627211
1079	PAM16	0.524991103969676
1080	ACP5	0.524958096044368
1081	C12orf79	0.524897765327091
1082	RLTPR	0.524876962711506
1083	B3GNT2	0.524838095065374
1084	TMEM88	0.524599185725422
1085	PRR16	0.524518196061744
1086	CHST12	0.524421441033333
1087	NPR1	0.52406136774299
1088	SLC10A6	0.523974678942524
1089	LBP	0.523959813015206
1090	SLC22A15	0.523908875888815
1091	CLMP	0.523899429168041
1092	CNR1	0.523736877507816
1093	SGK2	0.52362095099159
1094	SERPINA1	0.523489590930442
1095	MYD88	0.523452642949952
1096	CYTL1	0.523169313386174
1097	SH3BP5L	0.523087000035982
1098	PRRG2	0.522997120240245
1099	CPA3	0.522542415556462
1100	SARS2	0.522532779371897
1101	RDH14	0.522324235637191
1102	COPE	0.522009521860261
1103	YPEL4	0.521613046641339
1104	SCG5	0.521577935089895
1105	N4BP1	0.521365028438092
1106	KRTCAP3	0.521334620748847
1107	ZNF581	0.521239203691235
1108	PIP5KL1	0.521159828280992
1109	MPC1	0.520913287976561
1110	DGKD	0.520785355455821
1111	PTGER4	0.520678703697898
1112	SEMA5A	0.520671745250649
1113	DNMT1	0.5206112732489
1114	CPVL	0.520540759136733
1115	SLC2A13	0.520411039893557
1116	SRBD1	0.520367489027197
1117	KBTBD3	0.519406987894656
1118	EPM2A	0.519373783097978
1119	DNER	0.519371331452828
1120	CHIT1	0.519262054791709
1121	PPARG	0.519236673688793
1122	PSMB8	0.519171355725049
1123	RUNX2	0.519067574899418
1124	NOTCH4	0.519040155408312
1125	FRZB	0.518893194450955
1126	CHSY3	0.518786579128823
1127	SF3A1	0.518770261653649
1128	USP20	0.51868444660342
1129	RHOBTB2	0.518594450352476
1130	CDK14	0.518439567198049
1131	RNF182	0.518387500629843
1132	CBX8	0.518271301377272
1133	KIAA1671	0.518263794707218
1134	PAK6	0.518222290491115
1135	IKZF4	0.518184321582528
1136	EPB41L2	0.518128894372464
1137	KCNA5	0.518125619946688
1138	TNFSF13B	0.5180408199076
1139	LY86	0.517951441498922
1140	MYOC	0.517805687717049
1141	ITIH4	0.517790799296222
1142	NDUFAB1	0.517709571885657
1143	PCSK1N	0.517451399842473
1144	GPR146	0.517050075771381
1145	CNTNAP1	0.517004976951732
1146	MMP28	0.516944849497364
1147	RORC	0.516925464940831
1148	GALNT3	0.516757997345262
1149	ADAM15	0.516592367346212
1150	UCN	0.516440798107125
1151	TAS2R20	0.515688246968004
1152	FCER1A	0.515469724787373
1153	SCARF2	0.515095687316138
1154	FAM69A	0.515025688915996
1155	RSPO3	0.514971802156746
1156	OSR2	0.514966371715716
1157	MKL2	0.514952890627994
1158	ZC4H2	0.51471434767468
1159	RBM47	0.514653460625819
1160	CSF1R	0.51450770007318
1161	MARCH3	0.514403358630712
1162	SLAMF8	0.514395907932235
1163	FLYWCH2	0.51437323868787
1164	PBX3	0.514268248977521
1165	BPI	0.51406021365641
1166	JAK2	0.513964474477558
1167	ADAM33	0.513875008675088
1168	PPP2R1B	0.513870346075503
1169	C19orf59	0.513841398442625
1170	GMIP	0.513822060903968
1171	HSPA12B	0.51380127470319
1172	FABP3	0.513301164679096
1173	C1QTNF3	0.513223255347382
1174	ZNF385C	0.513096574362202
1175	PRG2	0.513090691058899
1176	SHISA3	0.513034455537278
1177	MLH3	0.512904553414388
1178	PDE1B	0.512821304381838
1179	HHAT	0.512686847954444
1180	HLA-DPA1	0.5125979469629
1181	MAP4K3	0.51254229761247
1182	HAS3	0.512412861933349
1183	TM7SF2	0.512273941884173
1184	IFT27	0.51198096713851
1185	BMP6	0.511834767065708
1186	DUSP4	0.511586335388976
1187	C2CD2L	0.511493119337289
1188	SEMA3D	0.511398910203904
1189	CA8	0.511345937502647
1190	CUTC	0.511224992955062
1191	IGF1	0.511186755591414
1192	CARD9	0.51116880035562
1193	LRP1	0.511022448046617
1194	VWA2	0.511012756459134
1195	ZFAT	0.510906886964419
1196	NLRC4	0.510723481121012
1197	THBS2	0.510691383260636
1198	ARMCX5	0.51010058845302
1199	LCK	0.510066498800916
1200	NECAB2	0.510049624301293
1201	SPATA25	0.510016194839467
1202	TMC8	0.509940296098695
1203	ARVCF	0.50992518816057
1204	CAPN1	0.509887252432285
1205	DEFB132	0.509832841691249
1206	EPN3	0.509821688027469
1207	GAL	0.509798352867125
1208	CEP290	0.509769366116746
1209	SMARCA4	0.509715910268386
1210	TMEM62	0.50966610952455
1211	SLC24A1	0.509049100254141
1212	RNASE6	0.508950424433105
1213	SMAD3	0.508725731430497
1214	PIP5K1B	0.508721544869948
1215	STK39	0.508714556392837
1216	ZNF292	0.508690123296205
1217	APBB1IP	0.508681874627478
1218	ARHGEF3	0.508471766913369
1219	KIF21B	0.508355544120498
1220	PKP1	0.508161450562366
1221	INPP5E	0.508018010909069
1222	TPST1	0.508007308581395
1223	GALNT18	0.506964563048068
1224	ZFP36L2	0.506629159025846
1225	ADAMTS16	0.506327468831372
1226	AC062017.1	0.506105147429641
1227	C5orf30	0.505968398439038
1228	VAV3	0.505866159911735
1229	NUDT8	0.505810881576134
1230	TCEAL1	0.505712693435889
1231	APBB1	0.505427704397444
1232	ANGPT1	0.505331861681305
1233	SLC2A1	0.505330353862695
1234	TLR5	0.505255051078551
1235	PDZRN4	0.505248093198895
1236	AXIN2	0.50503973235811
1237	ZP1	0.505016071951277
1238	GRAMD1C	0.504815378028483
1239	CBFA2T3	0.504759105852952
1240	RERGL	0.504573547394352
1241	NSUN6	0.504399829940131
1242	CEBPG	0.504331714375277
1243	WDR54	0.504295477118455
1244	WNT3	0.504230753625573
1245	GPR97	0.504192530963187
1246	PRDM16	0.504169361073773
1247	GRM2	0.504104999342117
1248	TMCC3	0.504067392689585
1249	TDRD7	0.503888922314881
1250	HTATIP2	0.503812918400472
1251	ARHGEF16	0.503800618509558
1252	ZFP62	0.50374919955106
1253	FZD5	0.503135651551677
1254	CADPS2	0.503130505780198
1255	KCNK17	0.503065610761607
1256	S100A3	0.502903792277574
1257	CDNF	0.502828772635173
1258	NFIB	0.502768515762578
1259	CTDSPL2	0.502284510108725
1260	SMAD6	0.502228289449222
1261	APOM	0.502087889513254
1262	PPP1R9A	0.502050428731679
1263	CDK15	0.502037825023024
1264	NFKBIL1	0.501973788893957
1265	ZDHHC1	0.501663337875545
1266	ZSCAN9	0.501550367763393
1267	EPSTI1	0.501409968092915
1268	POLL	0.501194822191032
1269	PIWIL4	0.501058377718101
1270	CLPS	0.500712755993826
1271	FREM1	0.500650989745409
1272	DSP	0.500338064586747
1273	MYO18A	0.500176179158679
1274	SCNN1B	0.500074991972171
1275	TLN2	0.499966327787643
1276	ADAM12	0.499933175875163
1277	PRL	0.49963124050836
1278	CHI3L1	0.499519754625413
1279	SRC	0.499251236085988
1280	CPD	0.499189881042331
1281	ST3GAL4	0.499116589972624
1282	MYO1F	0.498938262110266
1283	FRAT1	0.498835065234022
1284	TMTC2	0.498647668257199
1285	CD3E	0.498616167017491
1286	UACA	0.498616102223694
1287	RGS6	0.498613102555969
1288	TMPRSS5	0.498580232226083
1289	AGR3	0.498569565211588
1290	C19orf38	0.498505810640791
1291	MANEA	0.498482200785734
1292	PLEKHG6	0.498200607686716
1293	SCUBE2	0.498169529635991
1294	DNALI1	0.4976986143334
1295	KCNIP3	0.497398668439316
1296	DRP2	0.497327732085798
1297	KRIT1	0.49721135444386
1298	MIEN1	0.49706066523902
1299	CD47	0.497022371048702
1300	CENPO	0.496907841556509
1301	TTLL10	0.496714197148171
1302	CCDC88A	0.496568791934742
1303	SLC9B2	0.496534140106448
1304	TMEM135	0.496360137361577
1305	ADAMTS9	0.496244327459127
1306	PTPRS	0.496215198839922
1307	SUV420H1	0.496132009333838
1308	CLIC6	0.496054011933162
1309	LTB	0.495983161020302
1310	PKDCC	0.495971306929517
1311	BRSK2	0.495905656798993
1312	TCF7	0.495902079843824
1313	LDLRAD4	0.495520799746776
1314	CREG1	0.495513351764698
1315	PAFAH1B3	0.49549546926849
1316	CPA1	0.495388418870474
1317	MAT2B	0.495278982121376
1318	FICD	0.495114830128794
1319	DNHD1	0.49494949464922
1320	KLHL42	0.494934947964336
1321	FAM83H	0.494888398681183
1322	HSPB7	0.494805800125518
1323	FAM174B	0.494591550677181
1324	LRRK2	0.494410978868671
1325	PCDH19	0.494287133631396
1326	SP5	0.494261061568819
1327	TCF3	0.494128452907668
1328	PPP2R2B	0.4940193664589
1329	RNASET2	0.493784500583376
1330	ITGA11	0.49372827716746
1331	PDIA2	0.493374584573584
1332	KRT80	0.49327662022864
1333	DOCK9	0.493173927351707
1334	GPR137B	0.493137253063016
1335	N4BP3	0.493103912373137
1336	TMEM176B	0.493029921472519
1337	HES6	0.492753778123275
1338	MAL	0.492672991214333
1339	ANKRD13A	0.492623939533706
1340	RPS19BP1	0.492600989269007
1341	AKAP9	0.492493488887401
1342	ITPRIPL1	0.49203864723419
1343	CDKN3	0.491885141045542
1344	C20orf27	0.491856021503258
1345	SIX2	0.491561689796427
1346	CCDC61	0.491501774023615
1347	CTNND2	0.491434939641061
1348	TUBA8	0.49130638851276
1349	CYP26B1	0.491188046590459
1350	GREB1L	0.490791981661517
1351	S100A13	0.490455731851308
1352	ZNF275	0.489981665670126
1353	MYO19	0.489794544877807
1354	MEOX1	0.489462608070385
1355	PDZK1IP1	0.489391586379656
1356	TMEM100	0.489111534162569
1357	CD2	0.489067900686974
1358	C10orf137	0.488993742722639
1359	IFT57	0.488854972929444
1360	CILP	0.488770249624249
1361	WFDC1	0.488649600430966
1362	UBE2E2	0.488582025724167
1363	PRAF2	0.488563576439513
1364	FHIT	0.488555999392602
1365	POLG2	0.488322809953879
1366	HIST1H4E	0.488261916881301
1367	MEX3B	0.488149795267592
1368	RASL10B	0.487829914277951
1369	DNAH1	0.487779133302743
1370	FKBP2	0.487777954213359
1371	MDFI	0.487567512223435
1372	OLFM1	0.487433128078296
1373	TMEM255B	0.487122236149649
1374	PRDM8	0.487119646664277
1375	TAC1	0.487119015353318
1376	WDFY2	0.487085820931027
1377	RNF103	0.486930169862002
1378	GTF2A1L	0.486555551882884
1379	PKP3	0.486328330838247
1380	IL18RAP	0.486202157415523
1381	HOXB3	0.486128705187688
1382	DIXDC1	0.485960636928605
1383	AKAP6	0.485952513393699
1384	IL1RN	0.485874330331684
1385	CSRP1	0.485771287237264
1386	CEP120	0.485759145386505
1387	HSD17B4	0.485712894229586
1388	VNN1	0.485438228027221
1389	ZNF750	0.48536456971304
1390	TBL1X	0.485266470271519
1391	ITGA8	0.48513809000794
1392	NMNAT3	0.485128146032935
1393	RBP4	0.485099781518225
1394	MORC2	0.485007255896403
1395	ANO2	0.484572886620044
1396	CFI	0.484558323219172
1397	KIAA1211L	0.484339726930159
1398	AZI2	0.48423907840636
1399	TOP1MT	0.484128118157752
1400	TNRC6B	0.484101147310952
1401	C9orf116	0.484072283388049
1402	KDM3B	0.484053453337529
1403	LYN	0.48381762069101
1404	VEGFC	0.483805925407177
1405	KIAA1217	0.483777375081214
1406	ATAD2B	0.483732170847095
1407	JOSD2	0.483613709568855
1408	STK32A	0.483440480903109
1409	NCAM2	0.483323843084957
1410	CHST11	0.483217943343404
1411	SNX10	0.483138345756621
1412	TNFAIP6	0.482987769685929
1413	ABCA8	0.482961309036745
1414	EGFLAM	0.482926718752424
1415	SAMSN1	0.482912963930998
1416	VPS13C	0.482900379648801
1417	VPS26B	0.482862953520132
1418	WISP2	0.482578836067667
1419	TMEM237	0.482551854267603
1420	LY6D	0.482524202176924
1421	NPHP4	0.482441932352975
1422	NEIL1	0.482426753350529
1423	INF2	0.482209915361806
1424	REP15	0.481840368606145
1425	PEG3	0.481367693749132
1426	PITPNM2	0.481325267696686
1427	VMO1	0.481266441373935
1428	KCNQ3	0.481258765426081
1429	TRIM35	0.481208368322505
1430	HEXB	0.481119629389871
1431	C19orf66	0.480987712254168
1432	C17orf72	0.480717056369784
1433	TANC2	0.480545637898178
1434	TREM1	0.480421260860327
1435	SLC9A3R2	0.480201819511953
1436	SOX9	0.480081579313423
1437	SHOX2	0.479985262013494
1438	RAB17	0.479949541682014
1439	RNF31	0.479876131483289
1440	STXBP6	0.479773936572403
1441	LZTS1	0.479685667034573
1442	MDM1	0.479455320986281
1443	PDGFRL	0.479373378990578
1444	KRTDAP	0.479351143560578
1445	WNK1	0.479342669939023
1446	HSPB11	0.479278970920597
1447	CDCA7	0.479250944280974
1448	FOLR1	0.479171080679477
1449	TSPAN12	0.479079313449888
1450	CYP1A1	0.478894387264757
1451	PDE4B	0.478670503924519
1452	CLEC3B	0.478665597302131
1453	VEPH1	0.47863038562674
1454	HSDL2	0.478155762324718
1455	ETV4	0.47793821245297
1456	UCP2	0.477819951722064
1457	EIF4G2	0.477721267682016
1458	KCNH2	0.477525615185321
1459	EPHB4	0.477381324394018
1460	RBM11	0.477314781827357
1461	TXNDC17	0.477082778861149
1462	POLR2E	0.476970695999991
1463	S100A16	0.476915893189202
1464	CACNA2D4	0.476907531781278
1465	WIF1	0.476863982643426
1466	CROT	0.476768855411846
1467	ARG1	0.47673203523812
1468	HSD17B2	0.476662996109639
1469	CHKA	0.476657877396999
1470	REEP6	0.476332460353194
1471	BMPR1B	0.476319116196253
1472	ANP32E	0.476194014550704
1473	TBC1D9	0.475877523516549
1474	GNA14	0.475851904139535
1475	ARHGEF28	0.47576096999057
1476	AEBP1	0.47569256555384
1477	LIMD2	0.475654096150431
1478	LTBP1	0.475506703440423
1479	LSM4	0.475470162036333
1480	ADAM8	0.475339139287499
1481	AIM1	0.4752311957883
1482	SLPI	0.475192230911352
1483	PHLDA3	0.475161079242868
1484	MYOZ1	0.475070695250722
1485	NRXN1	0.474941766288303
1486	FBXW5	0.474916518053828
1487	FBXO46	0.474745963710464
1488	PLCD4	0.474688036867422
1489	GPR180	0.474584801207851
1490	C3orf18	0.474506871529816
1491	WASF3	0.474308166336448
1492	LONP1	0.474203541319183
1493	LRRC8D	0.474140386493007
1494	SGCA	0.474058504779912
1495	ARNT	0.473776843017099
1496	LLGL2	0.473761245137747
1497	DPYD	0.473758001997509
1498	FABP9	0.473739190355743
1499	TP73	0.473677358319674
1500	C1orf228	0.473492866854544
1501	PTGER3	0.473412068294803
1502	SUCO	0.473149270717365
1503	OR52N4	0.472889318196816
1504	SHANK2	0.472791872157399
1505	RASD2	0.472606670438963
1506	NAALADL1	0.47249093543405
1507	USP43	0.472486604655694
1508	LCOR	0.472006313761975
1509	CPSF4	0.471918063511999
1510	SPTAN1	0.471879081455913
1511	CREB3L2	0.47181239886461
1512	SPCS1	0.471526372942227
1513	LGI1	0.471522764927646
1514	FBLN7	0.471368393607183
1515	TMEM221	0.471315092674316
1516	ALDH1A1	0.471259335080617
1517	LRRC15	0.471174525187429
1518	KHDRBS3	0.471037039031374
1519	ATP8B4	0.470979016082163
1520	HADH	0.470836346768513
1521	TGM5	0.470830276014869
1522	DENND1C	0.470762691683118
1523	CD8A	0.470690863308077
1524	RIOK1	0.47065493323725
1525	PKMYT1	0.470485048915485
1526	PET112	0.470297001955107
1527	PIH1D1	0.470154926344392
1528	TFRC	0.469937891417367
1529	SASH3	0.469848872202168
1530	DHRS9	0.469797693850226
1531	MMD	0.46948007150131
1532	CDYL2	0.469385178639061
1533	MIEF1	0.469362211442215
1534	SERPINF2	0.469329809914065
1535	PLCH2	0.469303941815293
1536	EPB41L5	0.468969294847051
1537	EBF3	0.468740491816262
1538	SUSD3	0.468735373336363
1539	TMEM102	0.468680713369418
1540	KDM2A	0.468279389684746
1541	NTNG1	0.46816404420818
1542	EDC4	0.468116760630965
1543	ZNF521	0.468068784886976
1544	BTBD2	0.468062934946154
1545	S100A12	0.468005166201867
1546	RNF167	0.467966727349141
1547	REV3L	0.467647609067893
1548	HLA-DMB	0.467459031545981
1549	RTN4RL1	0.46711766773
1550	TP63	0.46691385591559
1551	UNC45A	0.466756984498531
1552	HEBP1	0.466685200351291
1553	CTNNB1	0.466585885244427
1554	HOXC9	0.46650031230416
1555	TRIM7	0.466451937622276
1556	VWA5A	0.466340206304315
1557	FLI1	0.466243670124035
1558	ALKBH6	0.466220111392251
1559	DOK5	0.466207586197859
1560	PLXNB2	0.466174480609393
1561	APOBR	0.466143731279921
1562	BMP1	0.466140468678799
1563	PHF19	0.465999237874455
1564	FGD3	0.465878225692993
1565	TMEM163	0.465739188708453
1566	MED30	0.46559485070591
1567	RAPGEF6	0.465579445922609
1568	ST8SIA2	0.465385895377688
1569	CPXM1	0.465238263498205
1570	SH3GLB1	0.465015859875621
1571	C1orf122	0.4645757791095
1572	LDOC1	0.46440174173227
1573	MB21D2	0.464167776715882
1574	SEPT6	0.464162841819833
1575	CDKN2B	0.464078895371397
1576	CHAD	0.463975720359274
1577	HOXC6	0.463909312467483
1578	NDST2	0.463857735993631
1579	ZMYM1	0.463847127246115
1580	ZNF267	0.463637509295201
1581	ALG6	0.463621323686623
1582	VPS25	0.463358128575262
1583	HIVEP3	0.463327896302303
1584	KANSL1L	0.463275217507459
1585	IL33	0.463256215975849
1586	THAP2	0.463126090630208
1587	FBN1	0.462836266596101
1588	COLCA2	0.462834231741831
1589	KIAA0922	0.462794996565125
1590	SERGEF	0.462671127323196
1591	BMP4	0.462601949021124
1592	HSD11B1	0.462570335998846
1593	CHD6	0.462565140846949
1594	HOXD1	0.462494656701241
1595	ANKHD1	0.462432300148814
1596	PEX11B	0.46237046870885
1597	QRFP	0.462336674432548
1598	SGCE	0.462180144510343
1599	ZNF830	0.462129836034185
1600	ISM1	0.461864851335375
1601	HOXB8	0.461811722912966
1602	ALOX5	0.461762128077028
1603	SRPR	0.4616937354226
1604	CIT	0.461551161841258
1605	TENM3	0.461521122061432
1606	TSC1	0.461223701183988
1607	TNFRSF11A	0.461166234437232
1608	CHAC1	0.461049685860725
1609	ISOC2	0.460902203903217
1610	CHST2	0.460879490816052
1611	MTCH1	0.460560119447013
1612	C9orf16	0.460469392083958
1613	SULT4A1	0.460368522946556
1614	CCP110	0.46022602587478
1615	FAAH	0.460003666375823
1616	RTN1	0.459904373473611
1617	GPBP1	0.459747771036438
1618	SMTN	0.459713031466055
1619	FASTK	0.459570993483647
1620	DAB2	0.459521104726908
1621	PLA2G4A	0.459363425213762
1622	UBE2T	0.459134954962575
1623	RARRES2	0.459039018503751
1624	SSC5D	0.458958804820364
1625	TBC1D2	0.458929535677693
1626	XPO5	0.458840151192215
1627	IL1RAP	0.458682478216576
1628	SOBP	0.458664242345531
1629	ASPG	0.458430191229038
1630	NHS	0.45834886708162
1631	LCP1	0.458257934786565
1632	CRIP2	0.458189318822636
1633	LEMD2	0.458099369937033
1634	CD200R1	0.458081810794585
1635	SGSM3	0.458001160905293
1636	BIN3	0.457811429169581
1637	C15orf59	0.457578417601792
1638	HAS2	0.457463726302457
1639	TRAF2	0.457426542152639
1640	CYB5R2	0.457381397057486
1641	HPD	0.457139422052429
1642	DSC2	0.457074026172793
1643	KDM5B	0.45692601080506
1644	PGR	0.456906030607502
1645	STAG2	0.456757798834288
1646	MFI2	0.456469864444191
1647	LEF1	0.456300521984855
1648	PTPN3	0.456280410639419
1649	SAA4	0.456253331169095
1650	ABCC1	0.456175346109093
1651	TLCD2	0.456053822559352
1652	EN1	0.455842260376373
1653	SLC18B1	0.455627961704059
1654	NIPAL3	0.455378094956137
1655	SRXN1	0.455297350262912
1656	C1orf226	0.45528725191503
1657	NUDT16L1	0.455286590473517
1658	NDUFC1	0.45478148685289
1659	FGD6	0.454740252436785
1660	TLR8	0.454558538994391
1661	PLCXD3	0.454505978255381
1662	RELA	0.454475508905942
1663	DACH1	0.454443680725497
1664	PPAP2A	0.454330084542435
1665	MYO1G	0.454293671805247
1666	PAPPA	0.454158218317105
1667	NEURL4	0.454023766606422
1668	TXNDC16	0.453822717553935
1669	FBXL15	0.453716735821879
1670	CD48	0.453699064994772
1671	GRID1	0.453587673389631
1672	ACTN2	0.453496554698332
1673	COL21A1	0.453488334915148
1674	LAMA4	0.453412016359317
1675	CD59	0.453350754784267
1676	PSD	0.453265424325186
1677	S100A10	0.453061882543885
1678	PAMR1	0.452853037303024
1679	PCDH12	0.452764043021966
1680	SLC25A30	0.452668351020425
1681	INTS8	0.452599566662848
1682	EGFL7	0.452570670814927
1683	FERMT1	0.452472282021632
1684	CMA1	0.452260261861257
1685	CCDC107	0.452189360388723
1686	NDUFB7	0.451839726222231
1687	LIPA	0.451682890501493
1688	PIAS3	0.45126674320744
1689	HAL	0.45124121450671
1690	BAIAP2L2	0.451238872603327
1691	ACHE	0.451157227133542
1692	PKN2	0.451133314000814
1693	RAMP3	0.451090411001273
1694	TRPV2	0.450963757778547
1695	COLEC12	0.450958969398203
1696	OVOL2	0.450672432470121
1697	KLHL41	0.45019315371881
1698	MECOM	0.450101841338634
1699	HHEX	0.449858894774605
1700	LRP8	0.449659698430071
1701	ARMC7	0.449543861947844
1702	ADPRM	0.449488085996135
1703	LIG4	0.449430354388364
1704	FAM102A	0.449322237487569
1705	CEP164	0.449294108523971
1706	TSHZ2	0.449100993966578
1707	PSORS1C1	0.449083430957049
1708	KIFAP3	0.448418251055456
1709	TGM1	0.448293123692254
1710	P2RY14	0.448150255385696
1711	SIPA1L1	0.44803103700102
1712	SORBS3	0.447938273846266
1713	RARRES1	0.447699437898485
1714	DUT	0.447674431577596
1715	NCF2	0.447516673793392
1716	PDE3A	0.447377658137682
1717	ZNF239	0.447283769577538
1718	SLA	0.447189842173371
1719	JPH2	0.447009889599847
1720	GORAB	0.446910704860128
1721	ZWINT	0.446906307872197
1722	PDE8B	0.446810322185144
1723	ME3	0.446764676926794
1724	C1QB	0.446719772682416
1725	ARHGAP32	0.446654997987642
1726	RIPK2	0.446589075440787
1727	SEMA6D	0.446476660596056
1728	GATSL3	0.446279196577175
1729	ADAM28	0.446122398225651
1730	ARHGEF7	0.446115685322265
1731	ROCK2	0.446070852601078
1732	TSPAN8	0.445948117329862
1733	ARMC9	0.445785655200128
1734	TBC1D10C	0.445660112281249
1735	SVEP1	0.445655167493328
1736	KCNA4	0.445641025641026
1737	STC1	0.445607042522653
1738	ASF1B	0.445406307889033
1739	ART5	0.445277642416142
1740	PTPRO	0.445229388325555
1741	CDC7	0.445144354094948
1742	KLHL36	0.44513228373916
1743	CHTOP	0.445129349221386
1744	VPS45	0.445075061668202
1745	CNKSR2	0.444894494556546
1746	CALCA	0.444719812130496
1747	STC2	0.444706925303855
1748	WNK2	0.444667057803271
1749	BLNK	0.444375898753166
1750	LMNB1	0.444248851095967
1751	CYGB	0.444242683601291
1752	EAF1	0.444121625911868
1753	MOGAT1	0.443792333269236
1754	CTSG	0.443772561797078
1755	P2RX1	0.443685278809605
1756	PALMD	0.443476394037196
1757	COG1	0.443456384569319
1758	LRRC4B	0.443395229855973
1759	F13A1	0.443383867043486
1760	GNG12	0.443373449371485
1761	LPAR1	0.443331692949969
1762	PMEPA1	0.443307782871147
1763	C19orf33	0.443145252343012
1764	STIM1	0.443123518620872
1765	CPNE5	0.442858745091846
1766	CHD1L	0.442844453853087
1767	KDM5C	0.442790806736467
1768	CD6	0.442710173784907
1769	FGR	0.442643492333138
1770	KRT7	0.442595083653194
1771	PGF	0.44255949576712
1772	GPATCH1	0.442521009064437
1773	AC131097.4	0.442457226889031
1774	C1QA	0.442393311180583
1775	PLEKHG1	0.44239135566769
1776	CD1C	0.442309983899172
1777	SFN	0.44221855854292
1778	COQ9	0.442187996647076
1779	FLNB	0.442037434917027
1780	NIPSNAP3A	0.441989216909011
1781	CAPN2	0.44197531713721
1782	MOSPD1	0.441785680666571
1783	FAM134B	0.441565745091353
1784	ITGB4	0.441460570322475
1785	TEX30	0.441378257331583
1786	ZBTB7C	0.441233476773243
1787	ZFYVE28	0.441196431132364
1788	IFIT5	0.441169598913387
1789	ZFAND2A	0.44109460251384
1790	VAX2	0.44106732242335
1791	MCC	0.440999946493274
1792	NPR3	0.440879493415387
1793	CYP2R1	0.440866542035964
1794	PDZD4	0.440833546855369
1795	LRFN3	0.440718225184565
1796	NXPH4	0.440522133251218
1797	IL1A	0.440438758079046
1798	SULF2	0.440237892843027
1799	RBPMS	0.440225812251232
1800	CMC2	0.440156871076959
1801	DLG4	0.4398917954349
1802	MMP9	0.439555776955893
1803	DOCK2	0.439539537221435
1804	PROSER2	0.439480448831231
1805	TMED5	0.439462696922808
1806	TP53BP1	0.439263044018256
1807	CEP57	0.439185991932125
1808	STK38L	0.439085084970781
1809	ZNF385A	0.439069122092735
1810	NNMT	0.438934672874223
1811	CDS1	0.438828207255717
1812	TGFB1I1	0.438828005944482
1813	RAB2A	0.438510627933587
1814	NTN4	0.438446192972664
1815	ANKRD10	0.438287425712528
1816	EDA2R	0.438265388068572
1817	SCRN2	0.438133118962105
1818	DCXR	0.437950016906677
1819	NBEA	0.437861299517633
1820	ALCAM	0.437601212701514
1821	ARAP1	0.437554695782447
1822	FRS3	0.437522254917478
1823	SPINT2	0.437443349971478
1824	SAMD10	0.43723086534728
1825	PAK3	0.437199577550262
1826	KRT13	0.437189690875976
1827	NOG	0.43700885163916
1828	MGST2	0.436819969131168
1829	IL17RB	0.436800594460051
1830	SCHIP1	0.436734908476048
1831	LIMCH1	0.43671299437239
1832	RAB34	0.436607306784741
1833	ANTXR2	0.436534065032662
1834	ATG4B	0.436477655979126
1835	MYO1D	0.43644415339057
1836	RUNX3	0.436371587879915
1837	PARVA	0.436056382442118
1838	ZNF251	0.435709017271232
1839	CRYAB	0.435707859287211
1840	TFPI2	0.435652405914504
1841	INHA	0.435465751865106
1842	BRIX1	0.435434411344821
1843	CCDC136	0.435424644971455
1844	ZDHHC13	0.435277452112055
1845	SNX33	0.435130790414587
1846	PRSS16	0.435055408043787
1847	AC007461.1	0.435032427602221
1848	AMIGO2	0.435002519230197
1849	CMTM8	0.43495555000008
1850	CPB1	0.434870580306771
1851	EFCAB13	0.434393598952623
1852	SLC28A3	0.434199770309593
1853	HMGCLL1	0.434083640816577
1854	SMYD3	0.433800885573529
1855	IGSF6	0.43353018997297
1856	SDC2	0.433398130601149
1857	GREM1	0.433327745402139
1858	KYNU	0.433276877373917
1859	SELE	0.432819758348259
1860	TWIST2	0.432725812594016
1861	DDX31	0.432695440828181
1862	WASF1	0.432623503472929
1863	KAT6B	0.432583738425115
1864	ELANE	0.432556304470274
1865	DHH	0.43251973399285
1866	CHST15	0.432431549092143
1867	PDE9A	0.432104177808179
1868	GNPDA1	0.432088109933017
1869	TNFAIP2	0.432040435363581
1870	KIF22	0.432018335708155
1871	GOLM1	0.431448932385735
1872	EFNB2	0.431130033200938
1873	TOM1	0.430931709458846
1874	BANK1	0.430774875324061
1875	BRD2	0.430758166456785
1876	MAN2C1	0.430735534696388
1877	HS3ST1	0.43054974702001
1878	PTGFR	0.430501037984701
1879	IL20RB	0.430290920411444
1880	PPAP2B	0.430059408996219
1881	EEF1A2	0.429955556035285
1882	ST14	0.429754594431421
1883	AGPAT3	0.429724790539664
1884	SDCBP2	0.429682621542935
1885	C14orf159	0.429629487607868
1886	TSPAN15	0.429541625094787
1887	PALM	0.429521740214736
1888	ISCU	0.429445323584727
1889	ADORA3	0.429277408980062
1890	COMMD10	0.428855562715467
1891	BID	0.428849770704787
1892	MLK4	0.428834547607632
1893	SIX1	0.428570902184376
1894	MYL5	0.428266764483591
1895	CADM4	0.42808978016675
1896	C2CD4C	0.428015996435993
1897	SEPT11	0.427969194428102
1898	ACSS2	0.427909217287905
1899	CRLS1	0.427810462482665
1900	SPOCK1	0.42776583221974
1901	DOCK6	0.427330620261012
1902	PROX1	0.427250295359292
1903	ABCA1	0.427119666268382
1904	NCOA2	0.427103598702332
1905	GPBAR1	0.426798611681943
1906	SNCG	0.426629234752729
1907	CKMT2	0.426560029002388
1908	ADCY5	0.426307755135976
1909	TNFAIP3	0.426231498905228
1910	ZNF174	0.426161039757686
1911	CBL	0.425547806779857
1912	TMBIM1	0.425531183778655
1913	LNP1	0.425421959462951
1914	EPDR1	0.425345243534967
1915	CACNB4	0.42534359212245
1916	CD274	0.425212875926619
1917	RASSF7	0.425173520572899
1918	B3GNT9	0.424988956440373
1919	BCAS1	0.424906173869148
1920	MGAT3	0.424894735124196
1921	CST7	0.424882905965474
1922	ADRA1B	0.424860861692651
1923	CCL19	0.424817345608656
1924	SERPINE1	0.424625251342062
1925	OBSL1	0.424530851331318
1926	GLDN	0.424273346287737
1927	PITPNC1	0.424041640911984
1928	TMEM178A	0.423911138872437
1929	PTN	0.423853360085296
1930	CCDC64B	0.42385270524597
1931	ZDHHC14	0.423563063865301
1932	TAGAP	0.423554693929593
1933	MCTP2	0.423525665022241
1934	KIFC3	0.423387784849312
1935	C19orf26	0.423321045565213
1936	NFXL1	0.423311103939995
1937	COPZ2	0.423156657012434
1938	SLAIN1	0.422902290238834
1939	FMOD	0.422810028843812
1940	NME5	0.422622929298442
1941	MANF	0.422610673824546
1942	KMT2E	0.422604116619529
1943	DIO3	0.422561179188326
1944	PDHA1	0.422346891655663
1945	CPNE1	0.422189764209303
1946	TACC3	0.422109700002858
1947	GSAP	0.421354132118041
1948	ANXA5	0.421342053617078
1949	LEO1	0.42132103057339
1950	SUCNR1	0.421294600018277
1951	CPZ	0.420962012979281
1952	GAS1	0.420480536586541
1953	SEZ6L2	0.420347665951416
1954	BTK	0.420171969738816
1955	RUNDC3B	0.420012662531617
1956	STARD13	0.41999229307616
1957	CPNE8	0.419969432274662
1958	IFI30	0.419926513104837
1959	LMO4	0.419888833990657
1960	BUB1B	0.419695922834569
1961	TRIM29	0.41962112030553
1962	VIPR1	0.419564865201257
1963	PTPN18	0.419444753076847
1964	WDR43	0.419337261588554
1965	BCL2	0.419311965796175
1966	RNF150	0.419310086378302
1967	CLIC2	0.419157951196172
1968	TRIM17	0.41913115684364
1969	NLGN3	0.419100429229121
1970	DMKN	0.419012088521147
1971	ERBB2	0.418834671211417
1972	OXA1L	0.41852718495893
1973	SLCO2A1	0.418430301485974
1974	ARHGAP18	0.41836623011434
1975	EPAS1	0.418366221840125
1976	PLOD2	0.418183826033074
1977	ZNF414	0.41815178006164
1978	FOLR2	0.418103265721062
1979	NHSL1	0.418071979544754
1980	IL18BP	0.417988317886861
1981	LATS1	0.41797603091681
1982	TMPRSS13	0.417884647019935
1983	C16orf89	0.417883709407901
1984	TMEM26	0.417645523362047
1985	UBE2L6	0.417585121072711
1986	LPHN1	0.417515442629341
1987	PPP2R5D	0.417482736676133
1988	OSR1	0.417454881309588
1989	ALDH1L1	0.417372776014272
1990	MAN2A2	0.417261395711841
1991	FYCO1	0.417212745107708
1992	PODN	0.417176357833946
1993	ARHGEF12	0.417155622072938
1994	IL20	0.417025721373547
1995	UXS1	0.417024761492373
1996	SERP1	0.416735042422149
1997	CENPJ	0.416598054858204
1998	RYR2	0.416585478343031
1999	MPP7	0.416521875466265
[truncated: 8,009 more rows]

## Sheet: Group2 (IR-TE)
rank	hub	r
1	AMPH	0.917715745301952
2	CTD-3193O13.9	0.906342182890856
3	HRASLS5	0.90310650887574
4	MYRF	0.892870474057484
5	TNMD	0.871814378090529
6	HSD11B2	0.865557467967107
7	ELMO3	0.865031237072918
8	LNPEP	0.857693048334296
9	SCNN1A	0.851620306832324
10	CTHRC1	0.838317320796085
11	ZNF275	0.829068753729402
12	ACVR1C	0.82813117344923
13	RCL1	0.826516891450783
14	ZNF423	0.824709300520098
15	ERP27	0.823360197553611
16	GYG2	0.82154786394299
17	PCK1	0.820020797199659
18	CTDSPL	0.818091253237697
19	MAPK10	0.817833900566344
20	PC	0.807268583217803
21	AQPEP	0.805453798275315
22	RALB	0.796499988586299
23	EPS8L1	0.796290063114811
24	TP63	0.789634768414609
25	PLEKHG6	0.787120230992152
26	C14orf180	0.778521352368511
27	CDRT4	0.77418802119559
28	NAALAD2	0.773360640952729
29	KIAA0040	0.77017425627083
30	GRAMD2	0.766500878642886
31	PKP1	0.765372748022624
32	ST6GALNAC3	0.764671408923614
33	NTRK2	0.763893388682618
34	ALDH1A3	0.763879867588338
35	KIAA0556	0.762193996858281
36	C12orf39	0.761368379784641
37	GFAP	0.755473344398789
38	SPG20	0.75246925165809
39	SLC38A1	0.752099866077909
40	NPHP4	0.752061803242278
41	CDKN2AIP	0.750894925247421
42	DVL1	0.750048480527087
43	B4GALNT4	0.749015652258749
44	PIK3C2G	0.746687213928825
45	MYB	0.746116307949346
46	RAD51B	0.745378927941837
47	MED16	0.745240227952212
48	ZNF689	0.735181236673774
49	TNFRSF11A	0.734371666311073
50	TMEM88	0.732700220902781
51	GIMAP4	0.7295791746437
52	TNFRSF8	0.722927879440258
53	ABCC11	0.7223777729916
54	PDLIM4	0.721738087936654
55	SGK2	0.718222393019287
56	NNAT	0.714003126115542
57	INPP5J	0.713094638012035
58	CRIM1	0.712394182765357
59	GLYCTK	0.708392033890688
60	C6	0.707758531874095
61	SOCS2	0.704611630744205
62	LGALS12	0.703671172264729
63	DNAAF2	0.702561670281869
64	PREX2	0.701242498938586
65	SLC7A4	0.698756129208855
66	TNK1	0.698047480652674
67	NR3C2	0.694924455426238
68	LHPP	0.693658382920542
69	PRRT4	0.692816218598502
70	HTATIP2	0.692296286060777
71	SYNJ1	0.690469908775814
72	INPP5K	0.689571282173505
73	PMM2	0.688696245123272
74	SGCE	0.688181006378591
75	SERGEF	0.687702017550771
76	IGSF9	0.687246909628455
77	ATG13	0.687110063081949
78	KCNE1	0.687051548021554
79	GRHL1	0.686731175429541
80	CCDC39	0.685012081374716
81	GPBAR1	0.684376754081794
82	SPSB1	0.683429855488013
83	RAPH1	0.682656007106374
84	ITGB6	0.678500478468351
85	CALCRL	0.678480071507315
86	EXOC3L1	0.677037839536547
87	MDFI	0.672677336882012
88	SERPINA5	0.671032642195472
89	ENTPD6	0.670608998050259
90	PRKCE	0.670114853902648
91	L3MBTL3	0.66827932540861
92	CTDP1	0.665480935044955
93	ECHDC2	0.664901878567836
94	VDR	0.662857299714103
95	RUNX3	0.658828849197377
96	KRT23	0.658779957805924
97	BACE2	0.656760675711292
98	LAMB3	0.656703553701695
99	AGTR1	0.656345979578786
100	DTX3	0.655340199429413
101	ACACA	0.655092331837374
102	CDK1	0.654004885712853
103	HDGFRP3	0.652941183361206
104	FLI1	0.649506126774413
105	TK2	0.649154372458465
106	VAV3	0.649061121697153
107	SLA	0.647700658017027
108	ZNF232	0.646103404545825
109	C19orf66	0.645830036172527
110	C14orf93	0.643567252160086
111	SPOCK2	0.642942191779096
112	AP1M2	0.642372024601256
113	RHOBTB1	0.64213789604515
114	ABCG1	0.640676949133135
115	C10orf137	0.640524510962622
116	EMC10	0.638697343322617
117	STK36	0.637350311250081
118	RCN2	0.63710422801625
119	ENTPD2	0.636899107696245
120	PREB	0.63519864237423
121	CNKSR1	0.634458546009988
122	PRR16	0.634244070165346
123	ATXN7L1	0.633977697376192
124	BTG3	0.63339541549716
125	TDP1	0.633354714147115
126	ANO9	0.631918819188192
127	KLK5	0.631452929551033
128	SUSD3	0.630391139998913
129	ADORA1	0.629268084079511
130	ITPR1	0.628978140270742
131	TFAP2A	0.628704764511742
132	PCDH18	0.627513942415616
133	TPD52	0.627281977539168
134	LIMD2	0.627276959584275
135	C6orf211	0.626092461161053
136	TFAP2B	0.625998123757095
137	PTPRG	0.625231127217878
138	MYBBP1A	0.624668733435666
139	TNFRSF4	0.62397634844405
140	DZIP1L	0.623858439277857
141	STK39	0.623369345626314
142	MSLN	0.620696176137323
143	CAPN13	0.620485633344152
144	DMRT2	0.615958936070929
145	LHX6	0.615923622057517
146	JAG2	0.615487035634417
147	LRRC17	0.613960638560465
148	FGF1	0.613325812562048
149	IL16	0.612435345706152
150	COPG2	0.612153534116088
151	CLDND2	0.610748077707716
152	PRRC1	0.610634552843251
153	PTTG1IP	0.61058719530453
154	KCNAB1	0.609248626324883
155	MARC1	0.608624346771561
156	TTC6	0.608165180666354
157	DFNA5	0.607809672126631
158	ARL15	0.607470271062034
159	COG7	0.607112727356702
160	CTCF	0.606704133153586
161	B4GALT2	0.606332230364339
162	ARV1	0.602224302131671
163	FST	0.601726559245756
164	ITGB8	0.599291617473436
165	TTI1	0.599184298414371
166	EDNRB	0.598832971694263
167	NFKBIE	0.598343743011053
168	PARP16	0.596981634537222
169	DDX41	0.596880089250221
170	MID1IP1	0.596634491738287
171	NHLRC3	0.596158000946939
172	C5orf58	0.595976331360947
173	HEATR2	0.595260187423238
174	TPCN1	0.594746059544659
175	KIAA1522	0.594672602203131
176	TTC39A	0.592736543670332
177	VCAM1	0.592538468091942
178	HRAS	0.591823120549565
179	NFATC3	0.591466490583721
180	CD163L1	0.591318638638253
181	AGAP2	0.590978719442458
182	PUF60	0.590876690553895
183	GATA2	0.589446702992349
184	HOXD8	0.589445325238313
185	FAM150B	0.589156450671337
186	PRSS16	0.588787993566849
187	FMN1	0.587670182355661
188	LMNB1	0.587506265379104
189	DLEC1	0.585664139164039
190	ACKR3	0.585659536608742
191	PML	0.585061517914401
192	CBY1	0.583018613061571
193	ETV5	0.582275632362225
194	NTHL1	0.582239842586054
195	FIGF	0.58145601374546
196	CCDC88C	0.579014087058825
197	MIIP	0.578818054298347
198	KANK3	0.578757297743754
199	TMEM218	0.57733573714161
200	CCDC9	0.577016216940691
201	ASCC3	0.575667785269257
202	TSPAN17	0.575222363119555
203	FMR1	0.573007376815335
204	CAMSAP1	0.572398761859769
205	COL16A1	0.572265243593892
206	PLIN1	0.57207862867667
207	ICAM2	0.571912984612723
208	LRIG1	0.571002240556035
209	SOS1	0.569785707965938
210	C17orf72	0.568773734696859
211	NID1	0.568326947745257
212	SMOC1	0.567606268262448
213	PDE9A	0.567387467769784
214	TESK2	0.567024920358628
215	POLD1	0.565428316208443
216	MAOA	0.564466953263524
217	RNF214	0.563431536313536
218	KIF12	0.562984496124031
219	WDR13	0.562538002531108
220	LACTB2	0.561987919541388
221	GRAMD4	0.560318833008946
222	HOXD3	0.560014423413524
223	HSDL2	0.559640228394334
224	TNNT2	0.559610278256343
225	ATP6V0E2	0.559301342707058
226	KRTCAP3	0.557604942967461
227	C3orf55	0.557064014181012
228	DNMT1	0.556667847789984
229	ARMC2	0.556074394876279
230	NLRC5	0.555609816037313
231	SLC35C1	0.555453142641753
232	NOVA1	0.555444553970109
233	CCDC132	0.555402236791361
234	ZNF608	0.555384599168927
235	CNST	0.555378930909631
236	GBE1	0.555361948100847
237	SEPHS2	0.554961018301928
238	CD79B	0.554490446048298
239	FNDC4	0.552461952597598
240	THBS2	0.552303937412312
241	HPN	0.551905623516553
242	FAT2	0.551816529697996
243	STEAP3	0.551695203901536
244	POMT2	0.551412478021664
245	FGR	0.550715694729434
246	MARC2	0.55017676764304
247	MX1	0.549351420132191
248	MERTK	0.549265669002554
249	UBL7	0.548830983810544
250	CREB3L4	0.548773731321953
251	TMEM8A	0.548197832537233
252	ACP5	0.548064609910914
253	MAP1A	0.547502448579824
254	ERC1	0.547411397828804
255	SDR39U1	0.547269355572563
256	GPER1	0.546867097446753
257	UBN1	0.546079968903725
258	TMEM260	0.545889031554879
259	CLEC16A	0.545374930383569
260	ANKS6	0.54527538722666
261	MAP2K7	0.544676327057745
262	HIC1	0.544353524916742
263	KIAA1468	0.544327546179954
264	ATXN2	0.544106242694563
265	IQGAP2	0.542612061749685
266	PER3	0.541296146622483
267	GAA	0.540288038200636
268	LMNB2	0.540256634624911
269	IFI27L2	0.540237211992843
270	CTC-429P9.4	0.540159771406178
271	ALDH1L1	0.540152690371364
272	CD72	0.5397433679129
273	DHRS13	0.538893454788957
274	AVPR2	0.538817472764075
275	CDH24	0.538420314583639
276	POLN	0.537835839290116
277	PTHLH	0.537135462878267
278	CDC42EP4	0.536558851622165
279	ZNF274	0.535848274163972
280	C6orf136	0.535540499349188
281	ALOX5	0.534743644678254
282	TF	0.534247651759108
283	TLN1	0.532815728454362
284	PON3	0.531604907125711
285	SELE	0.531319633572666
286	FHIT	0.529800842043223
287	MARCO	0.52967262682093
288	C1orf213	0.529633763390527
289	CPA1	0.528533181998291
290	VAC14	0.528333517631516
291	B4GALT3	0.527766214530385
292	ATP2C2	0.527657849422762
293	MESP1	0.527613805852572
294	CDH23	0.526171404455093
295	OSR2	0.526130055247135
296	CST7	0.525676891643649
297	PRICKLE4	0.525494898802391
298	EPB41L4B	0.525380823028508
299	GDPD5	0.525266786044783
300	TMBIM1	0.525263919782509
301	FBXO18	0.524918322500806
302	ZFPL1	0.524520542079141
303	CCDC82	0.524299305039895
304	TCP11L1	0.523940574128502
305	PIGZ	0.522808935875625
306	RSPO1	0.522172396611858
307	KPNA5	0.521903296217415
308	ELAC2	0.521772491449395
309	MED26	0.52053232210811
310	HEY1	0.520502646732432
311	HSPA12B	0.520343251736656
312	TNNC2	0.519972557426367
313	TMEM175	0.519694045321324
314	GALK1	0.519589098396837
315	PHF1	0.519490447570125
316	GLCE	0.519350660858255
317	L3HYPDH	0.518823313576783
318	PIWIL4	0.518690371710048
319	ADCY7	0.517757317087877
320	CORO7	0.517719688687353
321	ELMOD2	0.517705041217081
322	SEPT4	0.517652432977748
323	DNASE1L1	0.516754313628328
324	MIF4GD	0.516596877950423
325	RASAL3	0.515780808635946
326	KLHL42	0.515561583710403
327	KCTD15	0.515515515515515
328	NCBP2	0.514840213737313
329	STAC3	0.51446207312408
330	SNX10	0.514098424553458
331	ABCC3	0.513924948605046
332	SPOCD1	0.513363622133771
333	DEGS2	0.512430154924477
334	PTPN23	0.511822949040069
335	MFI2	0.511810314709165
336	MECOM	0.511747246641268
337	FAM166B	0.511635062534638
338	UCHL3	0.511440301407868
339	CCRL2	0.511417816813049
340	GPAM	0.510629716007318
341	HECW2	0.510573227918493
342	MTRR	0.510324165265279
343	RASSF7	0.510303549751893
344	FXYD3	0.510149958171323
345	TMX3	0.510101702307781
346	MME	0.509469732481026
347	TCF7L2	0.508734963764027
348	SSSCA1	0.508555212916177
349	CLDN1	0.508423434749811
350	SLC35B2	0.508417456626221
351	SPEF2	0.508156152873357
352	NAT8L	0.507297433316558
353	KRT5	0.507270288397049
354	ATF7	0.506596887688999
355	ALB	0.504303557106843
356	AKAP1	0.504250685712798
357	SHANK2	0.504244490954166
358	C9orf3	0.50424153456015
359	KHDRBS3	0.503998056268839
360	TPP2	0.503537999863256
361	ALDH18A1	0.503268025895215
362	B4GALT7	0.50320255692226
363	RNF135	0.502676241671255
364	HSD17B8	0.502337752050723
365	NEDD1	0.501811098502698
366	ZGLP1	0.501661764630072
367	CCDC107	0.501390962989803
368	ICA1	0.500774707625578
369	DKC1	0.500526556740165
370	ENOPH1	0.500476686915272
371	PPFIA1	0.500268377373399
372	NBAS	0.499575797735504
373	CHIT1	0.499262344991308
374	PEMT	0.497822586544744
375	LMO2	0.497110406886186
376	CECR5	0.496285965618696
377	SIGLEC1	0.495745338918297
378	PPP1R9B	0.495710061945399
379	ERICH1	0.495093959697592
380	IL17RB	0.49502321927511
381	MYO5C	0.493936332354808
382	ALG2	0.493917463514202
383	MEOX1	0.493873741496956
384	BTD	0.493543168065189
385	ASPHD1	0.493268986537973
386	SMARCD2	0.493210515026968
387	PPP1R35	0.492574462941675
388	TEX261	0.492222071988609
389	TRO	0.492091720016979
390	MAGI1	0.491415115942423
391	PARP2	0.491287538674332
392	GNPDA1	0.490663102345019
393	DGKD	0.490426802801526
394	TTC37	0.490348676993383
395	KIAA0196	0.490140233452402
396	ST6GAL1	0.489680903932086
397	UBXN4	0.489572352168071
398	TRAPPC6A	0.489536998707201
399	TIA1	0.489144998679972
400	SLC18A2	0.489117868138659
401	CCHCR1	0.4890577647245
402	LMBRD1	0.488652521551737
403	NSFL1C	0.488645655462594
404	PLAU	0.488356511964539
405	HPX	0.488277268093782
406	CDK17	0.488154823676001
407	MTF2	0.487508091312831
408	EXOC6	0.487187175489958
409	COX19	0.487133200991115
410	ATF1	0.486808914781966
411	HOOK1	0.486622633317296
412	TMEM63A	0.486547000980885
413	ST6GALNAC6	0.485626658558755
414	RCC1	0.4854211651744
415	UBE2E1	0.48478327403593
416	SHOX2	0.48456091619806
417	EFCAB4A	0.484299857164983
418	BRAT1	0.48425315772186
419	KIAA1324	0.483700745684571
420	AP001816.1	0.483032022313033
421	FAM107B	0.48260859333294
422	NCLN	0.481340719461189
423	SMG9	0.481213745911958
424	SLC25A18	0.481077730220219
425	GPR64	0.480927773821389
426	MIEF1	0.48066461589956
427	MEF2C	0.480461229746656
428	MAMLD1	0.480228420356121
429	BSDC1	0.480062478847679
430	FANCG	0.479900700136679
431	REPS1	0.479742547890223
432	TTC32	0.479354502129356
433	AP1B1	0.479200144589313
434	FBXL16	0.477844038657757
435	MRPL1	0.477809723006892
436	RAB34	0.477762903114495
437	CLPB	0.47770060190829
438	ATP8A1	0.477234575532639
439	RGS19	0.477230402878668
440	FRMD4A	0.47678050737307
441	CFP	0.476635431334322
442	TNFSF13	0.476202124038081
443	YBX2	0.476033133190978
444	TMEM80	0.47539152901443
445	OSBPL7	0.475322447957367
446	ANK3	0.474634529405093
447	TMCO3	0.473502867255501
448	MLLT4	0.473494595985589
449	SLC39A14	0.472454120283456
450	C19orf44	0.472215209049828
451	CRADD	0.471984814875946
452	PIK3R3	0.47157981792051
453	ARHGEF17	0.471321063409871
454	C1orf159	0.470937821555934
455	CCDC88B	0.470737315174157
456	ATP10D	0.470683010019094
457	CEP290	0.470469793499896
458	MRAS	0.470231137808473
459	RGS11	0.470104881756526
460	CYP4X1	0.470081749320608
461	UBAC1	0.470068878853391
462	FAM26F	0.470005226247569
463	CPSF4	0.469794686195647
464	SELP	0.469405961008302
465	MYO18A	0.469093249324499
466	LAD1	0.468728066168388
467	ACSS3	0.468608391976705
468	WDR11	0.468306064363969
469	ATG5	0.468039225369135
470	ITM2A	0.467989418188168
471	FAM208B	0.467569326044937
472	CASP12	0.467477424138265
473	ZCWPW1	0.467459281199096
474	BNC2	0.467102174124052
475	C16orf93	0.46647922171243
476	SCAMP2	0.466411505418804
477	YIPF1	0.466073607407661
478	COA6	0.465930369447672
479	CA11	0.465801516990231
480	EML3	0.465540794510227
481	MAPK13	0.465508682713372
482	EVA1B	0.465326145968833
483	KIAA0408	0.465037367858751
484	GMIP	0.464487174287615
485	PLCB2	0.464406167404032
486	IFITM10	0.464270964613347
487	POMC	0.464112202426752
488	JMJD8	0.464111045603709
489	MAATS1	0.464104963021986
490	TRIP6	0.463465757061768
491	LNX1	0.463402421507789
492	LGR6	0.463290883246029
493	NUDT6	0.4632249033509
494	TM4SF18	0.462415759460861
495	SSH1	0.462209177046776
496	DLAT	0.461596806421805
497	GPR68	0.461593706956058
498	ZNF584	0.460658644368065
499	FASTKD3	0.459906161811399
500	CNIH3	0.459811273241405
501	PEPD	0.459764743375795
502	CA12	0.459492119652827
503	ACY1	0.459482551128726
504	TFPI2	0.459420613320274
505	FGFR1	0.459055279179952
506	FGF13	0.458111946150437
507	STC2	0.458060020867281
508	C11orf24	0.457845446146316
509	PEX3	0.457657814933466
510	PPT2-EGFL8	0.457502762903097
511	FSTL1	0.457367180735452
512	ZNF174	0.456878725013817
513	LDHB	0.45687208816907
514	AMICA1	0.45545697950964
515	TRAPPC8	0.455424185611682
516	SEC61A2	0.454602754649444
517	CTTNBP2	0.453912956212802
518	AIMP1	0.453728833163792
519	WNT3	0.453728603691694
520	TM7SF2	0.45360835682436
521	SPAG4	0.453441822835554
522	NUDT14	0.453286334949663
523	COL5A1	0.453285155675994
524	PLCB4	0.453238022049945
525	C1orf131	0.453018644611997
526	PIM2	0.452913411535764
527	PDE2A	0.452650939310514
528	RALGAPB	0.45262223995497
529	DTX1	0.452027589122701
530	SCN4B	0.451544697626768
531	ZNF467	0.451202953012895
532	PLXNB2	0.451159212887438
533	MINA	0.45044163426905
534	DARS	0.450126379276624
535	AP006621.5	0.449945006364104
536	RTTN	0.449940313356544
537	ACTR8	0.449851824691645
538	DUSP10	0.449782872641352
539	CPNE8	0.449766759532849
540	C19orf24	0.449731669163547
541	GOLM1	0.449364735958778
542	NAT14	0.449126503728644
543	CCDC68	0.449119848883135
544	MAPK15	0.449111236669493
545	ANGEL1	0.448640534708989
546	UBE2D1	0.448346843297006
547	C3orf18	0.448320165162754
548	C6orf62	0.448201629117465
549	GORAB	0.447667843743525
550	CACNB3	0.446988330955345
551	MARK1	0.446944813592063
552	ERLIN1	0.446763346263629
553	APBB2	0.44653476471017
554	PMM1	0.446529584805476
555	CDC16	0.446036415439871
556	SNCAIP	0.445782029815711
557	MMP7	0.445492662473795
558	WDFY3	0.445465324663914
559	B3GNT2	0.445286706564035
560	NUDT18	0.445265679444503
561	CCNH	0.444735449930076
562	HRC	0.444677503932879
563	NINJ2	0.444301445474503
564	MROH6	0.443990025709625
565	USP24	0.443737846611812
566	ACP2	0.443574177662591
567	STRIP1	0.443281433516262
568	ENKD1	0.443129666142029
569	TEX2	0.443060791020788
570	PRPF40A	0.443059273078379
571	TYMS	0.443013483402996
572	KIAA1407	0.443012884316512
573	MPP2	0.442941779197345
574	EMC9	0.442901341350957
575	WFDC2	0.441808105199353
576	ULK2	0.440584952016035
577	WDTC1	0.440504177673302
578	ZSCAN9	0.44045009139415
579	TMEM139	0.440433591169094
580	ZBTB21	0.440237635667152
581	GABRE	0.439418305219041
582	PTGES2	0.439284928564738
583	PEX1	0.439050359896529
584	SLC44A3	0.438707164890568
585	PSD	0.43857972130152
586	SLC25A35	0.438314187898362
587	PITRM1	0.438224054540256
588	SMAD6	0.438017254792034
589	HSPA2	0.437723430894954
590	CASD1	0.437625085549443
591	HSD17B4	0.43744835586708
592	FAM65A	0.437016562248791
593	GFPT2	0.436735365914769
594	PDZD2	0.435685947168358
595	CNTN3	0.435585109605269
596	MED7	0.435563807164065
597	TRA2A	0.435441406186303
598	SLC36A4	0.435434334647536
599	CNN1	0.43527884521248
600	TOPBP1	0.435256633128481
601	ETS1	0.435027685340626
602	CLEC4A	0.434544138581047
603	IGSF21	0.434530376915638
604	HDDC3	0.434409329051884
605	HAS1	0.434299099054043
606	FOXRED1	0.434223367598089
607	CDK9	0.433558998686089
608	EARS2	0.433202593669419
609	KCNIP3	0.433145092747743
610	CMYA5	0.433029626515228
611	ACLY	0.432140262609488
612	ZNF664	0.431729834291623
613	PI16	0.431266521648372
614	ARFGAP2	0.431261702971771
615	PNKP	0.431005403957535
616	DLG5	0.430756309638892
617	GAB1	0.429993884167188
618	GPC3	0.429643203817438
619	TPR	0.429207543867912
620	MDP1	0.428719805908495
621	CREM	0.428394350297066
622	BOC	0.427773428490754
623	HAGH	0.427359490986214
624	KIAA1755	0.42659453529972
625	AGL	0.426321796507845
626	DOCK6	0.426162112246469
627	IL2RG	0.425982163906252
628	LRRC15	0.425714598634602
629	MAP7D1	0.425452254609191
630	EDEM3	0.425368089219284
631	ADA	0.424962790612761
632	MLLT3	0.42425835916906
633	GYLTL1B	0.423969506630161
634	ADAMTSL1	0.423850626255734
635	SSH3	0.423833419169105
636	TPRA1	0.422484401449968
637	ALG6	0.422171874886504
638	PPP1R3F	0.422089780224606
639	CBFB	0.422046890830369
640	CARD10	0.421936096178706
641	TCF4	0.421859752664638
642	KRT80	0.421238935043524
643	STARD9	0.421088126155276
644	GNG2	0.420703813264795
645	C14orf80	0.420339662459694
646	MAP3K11	0.420280725915398
647	PDK2	0.420265249278103
648	TNS1	0.420261979311087
649	DUSP6	0.420146050154122
650	TCEA3	0.420140986496138
651	EXT2	0.419816864476012
652	AVIL	0.419805925110448
653	ARID2	0.419733638921645
654	DGAT1	0.419134535501116
655	CRY2	0.419057313500754
656	CNOT1	0.418291289426504
657	C5orf38	0.418103916841277
658	RFX2	0.417639362651108
659	TGIF1	0.417635948305932
660	BCAT2	0.41759927112964
661	PRKCDBP	0.417479627923989
662	KLHL9	0.417350616717239
663	DLG4	0.417105942133081
664	SH2B2	0.417040798300186
665	KIF21A	0.416984749951531
666	AP2S1	0.416782033785816
667	ATP5E	0.416670351524496
668	TTC17	0.416342491946414
669	COMMD7	0.416103285341669
670	KEAP1	0.416006146915054
671	WDR4	0.415748282803235
672	SULF2	0.4156535590586
673	PPIL1	0.41472441644282
674	SAMSN1	0.414672211544149
675	MACROD1	0.41432778898618
676	HSD11B1	0.413903743315508
677	NDST2	0.413397977921703
678	LAMA3	0.412085071023959
679	CADPS2	0.411953317306415
680	RAB17	0.411908319947717
681	DCBLD2	0.411829658244209
682	COX7A1	0.411576732029125
683	PKN1	0.411522662938975
684	SHKBP1	0.4113206749657
685	IL24	0.410938973058039
686	PREPL	0.410446146385849
687	UBE3B	0.410392470028752
688	DNM3	0.410371730483788
689	CHST15	0.410199982237595
690	CYTH4	0.409841284064033
691	TPK1	0.409692701779483
692	TSC1	0.409679313892784
693	MAGI2	0.40963987295745
694	ENPP2	0.409575728845698
695	SLC43A3	0.409088631294327
696	DNAJB2	0.409024596587204
697	SGIP1	0.408991892440427
698	SYCE1L	0.408911291467535
699	TRIM35	0.408568344878631
700	ZNF514	0.408568320672112
701	APMAP	0.407745471750328
702	PALMD	0.40736494395619
703	GATSL3	0.407225741152127
704	RAB6B	0.406752058349713
705	CMTM3	0.40657202694166
706	MED25	0.406438756429574
707	TRIM29	0.40607953667101
708	NAF1	0.406031416121537
709	SLC25A40	0.405713395985046
710	FGD3	0.405568650910257
711	RGS10	0.405437995632375
712	PLXNB3	0.405269265673567
713	MOSPD3	0.404512406976675
714	NFYA	0.403528157428218
715	CEP164	0.403210017118117
716	ADAP1	0.402972371792293
717	NOC4L	0.402886516719947
718	SLC9A1	0.402879642573212
719	BIRC3	0.402761625046528
720	GMPR2	0.402084944881348
721	ANGPTL2	0.401765527204759
722	THOC1	0.4017575814374
723	GEM	0.401707737133256
724	PHF23	0.401422786939405
725	NAA25	0.400858848129985
726	HOXB3	0.400615130529382
727	HID1	0.400234702366625
728	ZMYM1	0.399901458801373
729	TFF3	0.399610814244754
730	GLT8D2	0.399529607866845
731	ZBTB22	0.399260604582471
732	MUC15	0.399149611891656
733	PHYHIP	0.399135987520716
734	ITGA8	0.398977056880147
735	DOPEY1	0.39884571699815
736	PPP1R1B	0.398294515256022
737	GPT	0.398155371699065
738	DCST2	0.397756467768036
739	DGAT2	0.397244315375985
740	TMEM100	0.396994503084963
741	C1orf162	0.396196066722324
742	LDLRAD2	0.396171792251605
743	ALDH4A1	0.396027954752873
744	NAA20	0.395636307568317
745	GPC4	0.395615981911143
746	ING1	0.395151370569349
747	TRRAP	0.395108098806634
748	SERPINF2	0.394889333612115
749	F8	0.394754760564028
750	PLEKHM2	0.394722646283656
751	CACNA1C	0.394481948928676
752	CRNKL1	0.394386007858465
753	HOOK2	0.394312424675267
754	GALNT2	0.394280219299323
755	KLK1	0.394161669812041
756	SH3D21	0.393743167347671
757	TMCC3	0.393630237797597
758	CYTIP	0.393470433745753
759	TM4SF1	0.393372127308817
760	ME1	0.393179296636668
761	MRAP	0.392847466811162
762	ARL6IP6	0.39258999837107
763	TANK	0.392534038509328
764	JMJD1C	0.392411083278471
765	ZNF623	0.392332721907648
766	METTL13	0.391615396184651
767	PISD	0.391594192609421
768	DCUN1D5	0.391588647497148
769	USP36	0.390961424770542
770	HMG20B	0.390868090187028
771	STK16	0.390532444974872
772	PDIA5	0.390411572390216
773	RAB40C	0.390247931538314
774	SAMD4A	0.389750482600303
775	TNFAIP2	0.389693775281271
776	ZNF781	0.389397712928128
777	RNF166	0.389017610542185
778	LIPA	0.388551115818551
779	NPR1	0.388501049466382
780	EPS8	0.388374920068822
781	CEP63	0.38815267561133
782	CTDSPL2	0.387216172405486
783	CIDEA	0.38709009697343
784	NSMAF	0.387083716394344
785	CKAP5	0.386860963696568
786	UBR7	0.386570704517572
787	RIT1	0.386270872533761
788	CYP26B1	0.385998177903793
789	MPP3	0.385510425672538
790	PPP3CC	0.385413288862637
791	SMAP1	0.384904893944598
792	VARS2	0.384848411486683
793	ZFAT	0.384822919871443
794	ZDHHC4	0.384626237902503
795	TRPV6	0.384498880284356
796	DHRS1	0.384452860675876
797	SLC22A23	0.384407222649024
798	EEPD1	0.384209508726403
799	CACNA1D	0.384181626396979
800	PPP1R13B	0.384128184130965
801	LZTFL1	0.384003097993315
802	ADIRF	0.383742405301801
803	TMEM141	0.383512585793664
804	MICAL1	0.383299841607582
805	STOML1	0.382626535012059
806	FBN1	0.382475281454329
807	IL6	0.382121423540563
808	PLXNA3	0.382105191335391
809	HEBP2	0.381859142516685
810	WRNIP1	0.381800131265828
811	SERTAD2	0.381790959646371
812	C18orf32	0.381675392853299
813	IGFBP7	0.381298520482303
814	VPS39	0.381218128535847
815	HDAC8	0.381127816128482
816	PIEZO1	0.381101971033028
817	SCFD1	0.380374812728202
818	CMTM4	0.38005231785908
819	NTM	0.379978490587599
820	EPS15	0.379664224876343
821	ARHGEF3	0.379493428310164
822	SERPINE2	0.379229308613788
823	PDXP	0.379158105755918
824	LONRF1	0.378134362565154
825	ACSS2	0.378057036674134
826	VAMP4	0.3776789319251
827	HAUS4	0.377417730944062
828	DYRK1B	0.377191593842376
829	HK3	0.377133401319967
830	BTK	0.377065377747203
831	TBXAS1	0.377052157198333
832	CLN6	0.376909315395685
833	TWIST1	0.376854946036431
834	RNF167	0.376848596526014
835	COL6A2	0.376702536521415
836	CHRDL2	0.376630465317573
837	MRPL43	0.376564925714864
838	PARVG	0.37611824612481
839	JHDM1D	0.375902384184313
840	PLOD2	0.375791398976203
841	PRCD	0.375779185903313
842	PHF7	0.375764175157502
843	CHD1	0.375599397778089
844	PRRT1	0.375591387467413
845	GPD1	0.375509869766503
846	SCML1	0.375359296035167
847	CYP2R1	0.375148771136142
848	SMCHD1	0.375000923611197
849	SLC4A2	0.374620118091761
850	FAM214B	0.37459770427
851	MYO1F	0.374586315919695
852	DNAJC4	0.374377311315822
853	CCDC149	0.374225070181368
854	FAIM2	0.373844797947581
855	ATP6V1E2	0.37367039144091
856	MEPCE	0.373617756683906
857	PRKD2	0.373565517442602
858	ZHX1	0.373483787643296
859	GPR146	0.372829110982942
860	AMDHD2	0.37252929543302
861	SMAD3	0.372332296526114
862	ORAI3	0.372330130178331
863	MITF	0.372103844571458
864	EMG1	0.372093601185391
865	OBSL1	0.371959519864589
866	GPR56	0.371693838758811
867	RAP2C	0.371526184031301
868	OSCP1	0.371207194416496
869	TNNI2	0.371145892023835
870	LOH12CR1	0.371118605338035
871	ADD3	0.370924293793071
872	EPG5	0.370864968864431
873	TRAF3	0.370755121995185
874	PNPLA2	0.370736686677666
875	DKK3	0.370714521085318
876	RNF34	0.370681379822008
877	PSMF1	0.370603795654396
878	WDSUB1	0.370168350584989
879	TP53I13	0.370097720248411
880	LRRC23	0.369848153966526
881	PPP3CA	0.369681929145906
882	PLEKHA1	0.369650951135369
883	MPP1	0.369418928166297
884	ZNF385D	0.369278334078442
885	GPD1L	0.369119364056166
886	DERL3	0.369103587032761
887	NECAB3	0.368873566164189
888	MGEA5	0.368870888855266
889	KIFAP3	0.367868776385635
890	EVL	0.36786507204102
891	POPDC2	0.367001464177954
892	POLA1	0.366630756629179
893	ANKRA2	0.366553260425947
894	FARP1	0.366478282989198
895	RINT1	0.366423315901979
896	PPP2R5D	0.366357363770376
897	BBS1	0.366182175230612
898	CANT1	0.366069259047572
899	NEK9	0.366055860997027
900	LPCAT1	0.365199082040068
901	TRMT1	0.36509177003719
902	CRY1	0.364699933537798
903	SIGIRR	0.364510972693043
904	TP53BP1	0.364411736882515
905	RBPMS2	0.364084141090631
906	KLK6	0.363930019376336
907	TRIT1	0.363779244884576
908	DNAJB4	0.363627066303234
909	TAX1BP1	0.363588637396056
910	GOSR2	0.363445408507024
911	FUT11	0.363347949149524
912	LYPD6B	0.363347014883095
913	MTM1	0.362803875835512
914	MYEOV	0.362688842137208
915	FUK	0.362458411413782
916	NDRG2	0.362443037495145
917	C14orf28	0.36233278527258
918	BEX4	0.362331781884441
919	SMAP2	0.362245813809915
920	CYBA	0.362172964802445
921	TMEM144	0.361873519335631
922	TMPRSS13	0.361646025535443
923	GFRA1	0.361629775830964
924	DROSHA	0.361545888485524
925	SDF4	0.361171835057149
926	YAE1D1	0.361002656883605
927	RB1	0.360994729312317
928	CALU	0.360951279215569
929	TBX3	0.360949898691779
930	C3orf58	0.360772339938301
931	GIT1	0.360451167829968
932	SOX8	0.360176608234389
933	ALDH1A2	0.360066256188032
934	ZC3H14	0.359966823334255
935	POLB	0.359339389432777
936	ZNF185	0.359255599229789
937	TTC28	0.359253088850726
938	HPGD	0.359075497210254
939	EFCC1	0.359016628433276
940	EPHB4	0.358532300660219
941	NFKB1	0.358215852554169
942	ZNF76	0.357443683690926
943	GRK5	0.357405517633335
944	SLC1A3	0.357221263534485
945	ELTD1	0.357199969572405
946	KATNA1	0.356691475803053
947	UBE2Q2	0.35653082960856
948	GOLGB1	0.356506042863557
949	C16orf45	0.356411416482403
950	PARM1	0.355902325329819
951	SPATA13	0.355720222848559
952	ZGPAT	0.355687606965285
953	SEPT11	0.355623598051649
954	PIGK	0.355522373483136
955	PTPN13	0.355273998259547
956	RBBP8	0.3552694119855
957	ITGA6	0.355177552616561
958	TMEM214	0.355071063314487
959	AP1AR	0.354952869976287
960	KPTN	0.354951259321023
961	UCHL1	0.354894777493056
962	DXO	0.35464058287762
963	SLC19A2	0.354619709519717
964	OARD1	0.354172685565377
965	SLC25A28	0.353882109667172
966	USF2	0.353743284846238
967	PGRMC2	0.353598279185523
968	WNK1	0.353005109877701
969	ARHGAP8	0.352959088937524
970	PJA2	0.352881895698008
971	RGS14	0.352787940058631
972	SLCO2A1	0.352670618908821
973	FUBP1	0.352620203180232
974	NDC1	0.352582434537101
975	MAST4	0.352531324152036
976	PLCH2	0.352495710003847
977	SLC4A4	0.352406280540745
978	SHROOM3	0.352317532699743
979	SLC20A1	0.352305297273525
980	DIAPH1	0.352245555911118
981	DFNB31	0.352119479554907
982	EMD	0.351604879640408
983	CYP4F22	0.350638995828914
984	CYSTM1	0.350565106279282
985	SDHB	0.350510184164961
986	NTN4	0.350166354086913
987	SCYL1	0.349452105717142
988	LRRC45	0.349445738690093
989	ITGB3BP	0.349352427025825
990	GABPB1	0.349244548036467
991	STK17A	0.34895577249962
992	TAPBPL	0.348837070999243
993	HSPBAP1	0.348734753723007
994	RTN2	0.348182282865911
995	UCK1	0.347943471443813
996	G6PD	0.347845669709043
997	TBC1D8	0.347711226577005
998	TFEC	0.347667363818454
999	MARK2	0.347525530984353
1000	AP3B1	0.347384457570394
1001	FYCO1	0.347050212475661
1002	MXD1	0.346973383916948
1003	ATF3	0.346722219758885
1004	ROGDI	0.346682669744058
1005	SPINT2	0.346522889313186
1006	TCF19	0.345747883207445
1007	ALS2CL	0.345650887961313
1008	SPP1	0.345380365668292
1009	FRYL	0.34536751685442
1010	DRAM2	0.345061731747316
1011	KLC2	0.344918411078768
1012	NID2	0.34474156077025
1013	KDM5B	0.344696872447865
1014	EGFR	0.344659621747774
1015	CENPJ	0.344640248400224
1016	CAPG	0.344634573371894
1017	IMP4	0.344185038520806
1018	SMAD4	0.344025011438009
1019	MDH2	0.343852313581078
1020	TM6SF1	0.343635512550422
1021	STAMBP	0.343544925036031
1022	CMC1	0.343507283912275
1023	RND3	0.343400524659105
1024	MMRN1	0.343259715967089
1025	KLC1	0.343159955332044
1026	SCARF2	0.343136857368538
1027	ITGBL1	0.343058022224669
1028	PRSS22	0.34292204859517
1029	DHRS12	0.342810458719311
1030	USP5	0.342075568551211
1031	C7orf63	0.342074136363203
1032	KIAA2026	0.342033242696485
1033	PDE5A	0.341978252684185
1034	TSPAN9	0.341809767272182
1035	G6PC3	0.341807989810582
1036	SENP3	0.341763693041967
1037	WRAP73	0.341692774678778
1038	PPP1R12A	0.341692732842688
1039	POLR2H	0.341416929860872
1040	MTA2	0.34102049591515
1041	KLC4	0.34090441061771
1042	XXYLT1	0.340337428203524
1043	GSKIP	0.340275668118728
1044	BCL3	0.340262095117315
1045	NCKAP1L	0.34007349403891
1046	SLC9A3R1	0.339924354931927
1047	NRG1	0.339770500979569
1048	MBNL2	0.33949778865366
1049	CLTCL1	0.339012867051924
1050	FMNL1	0.339004862127598
1051	SATB1	0.338793383994382
1052	ATG16L1	0.338715205441801
1053	SCARA5	0.338594793578704
1054	MFSD1	0.338557173844379
1055	TC2N	0.33843016810225
1056	CBS	0.33839428519799
1057	FAM110A	0.338012368204641
1058	PIBF1	0.337828602287468
1059	ACSM3	0.337620717000335
1060	WLS	0.336908859989188
1061	TAC1	0.336880960790775
1062	FIP1L1	0.336611134947707
1063	LRRFIP2	0.336514984059629
1064	SLC35F5	0.33617783247835
1065	KIF13A	0.335838797377259
1066	EPB41L2	0.335745593547262
1067	TBX18	0.33545736907432
1068	ALAS1	0.335145425153145
1069	NRP2	0.334985427162525
1070	SNRNP40	0.334305006184191
1071	C18orf21	0.334044608374235
1072	PHLDB2	0.334026187253665
1073	LONP1	0.333856531054707
1074	HIPK1	0.333487170573533
1075	NDUFV1	0.333230207203302
1076	ABI3BP	0.332871698262338
1077	MCTP1	0.332616369617257
1078	MYL3	0.332369912509812
1079	RAB25	0.332076603606563
1080	NLK	0.331833520809899
1081	ID1	0.331778640578866
1082	RIN2	0.331606780696775
1083	NR2C1	0.331221923076174
1084	LIMCH1	0.331142792564985
1085	HLF	0.331098115809025
1086	GNAI1	0.331058429884778
1087	GLIPR1	0.33103910299602
1088	PDE8A	0.330991717483626
1089	ZFYVE19	0.330832260666044
1090	TIMP1	0.330579520895719
1091	LIN37	0.330494216450915
1092	FAM3A	0.33026239544291
1093	TRAPPC1	0.330253441011364
1094	IQCJ-SCHIP1	0.330054777180489
1095	ZNF577	0.329834541997419
1096	CUEDC1	0.329745198606618
1097	PQLC1	0.329691986913294
1098	CSF3	0.329593362617127
1099	ARAP3	0.329509458676291
1100	ZMYND15	0.329424099913642
1101	PAM16	0.3289092364818
1102	SCG5	0.328791198093871
1103	TRNAU1AP	0.328438428675833
1104	CEP350	0.328434126949652
1105	CEP192	0.328388330733866
1106	TRPS1	0.328316266821944
1107	MED14	0.3278656626706
1108	PLEKHG1	0.327830607621485
1109	TSPAN5	0.327482971654947
1110	CTNNBL1	0.327424054648526
1111	AIM1	0.327325816733365
1112	NFIA	0.327257571511937
1113	KAZN	0.327113051588954
1114	PPFIBP2	0.327064112670925
1115	MRPL22	0.326955472232429
1116	LSM6	0.326675077865066
1117	RAC3	0.326477518399524
1118	MYO1E	0.326334723964155
1119	KLHL18	0.326165375334934
1120	RUFY1	0.326163745431972
1121	ADAM15	0.326134938780197
1122	SCRN2	0.325942381862009
1123	PTPRS	0.32561554160365
1124	CDC73	0.3255347239468
1125	MAMDC4	0.325352092879431
1126	PSMA4	0.325143303102882
1127	ARHGAP17	0.324925680464454
1128	CCDC102B	0.324788551035302
1129	PDE4B	0.324485823749051
1130	LEPREL1	0.324416286627916
1131	AGPAT4	0.323985546021825
1132	ACAA1	0.323496279078822
1133	CDIP1	0.323339930190453
1134	ESAM	0.322886930486892
1135	MAP3K12	0.322565606473135
1136	RAPGEF4	0.322292349816126
1137	COL14A1	0.321988504887973
1138	USP30	0.321734727991053
1139	MBD5	0.321098447751233
1140	RNF111	0.320780128732662
1141	P4HA2	0.320453654549344
1142	NGDN	0.32042398897647
1143	ZNF691	0.320378176081471
1144	GPR17	0.320156382084556
1145	ARHGEF40	0.319667129682219
1146	RAP1GDS1	0.319525452099553
1147	FZD6	0.3189485983154
1148	TBC1D2	0.318848168703108
1149	PGS1	0.318363955060765
1150	MPDZ	0.317629624633348
1151	ANAPC5	0.317408793016716
1152	FRS2	0.317291615431038
1153	TMEM164	0.317256929823455
1154	WSCD1	0.316782506380937
1155	METTL3	0.316422450676376
1156	CCDC51	0.316383805335758
1157	LRSAM1	0.316326503698534
1158	ANGPTL1	0.316049867671546
1159	BAIAP2L1	0.31597059777219
1160	MRVI1	0.315892442177304
1161	SEMA4A	0.315486824969421
1162	ABCA3	0.315216629844433
1163	CTIF	0.315047566320885
1164	CRLS1	0.314609121652018
1165	NT5E	0.314296930695055
1166	HIPK3	0.313882588152857
1167	AVL9	0.313702583344683
1168	CA4	0.31346557351887
1169	TEAD4	0.313412569408401
1170	UBR4	0.313309982981066
1171	SIDT2	0.313073985215023
1172	EFNA1	0.313004959798655
1173	TNFRSF12A	0.312977601685011
1174	LCAT	0.312939717311046
1175	ECH1	0.312750340008481
1176	IL10RA	0.312693899559923
1177	EED	0.312685119903104
1178	RAD51C	0.312511636541628
1179	RORC	0.312429362081175
1180	ZG16B	0.312400409165764
1181	SLC25A39	0.312344786298113
1182	ITIH4	0.31212033611607
1183	PINLYP	0.311774650226236
1184	IDE	0.311736900302306
1185	MT3	0.311488219514364
1186	TUBA4A	0.310980784215293
1187	SLBP	0.31086778065237
1188	PDGFB	0.310583476800075
1189	TRIM27	0.310552935202712
1190	SLC7A6	0.310453282041323
1191	SEC61A1	0.310383907990556
1192	FAIM3	0.310216121552962
1193	DMKN	0.31012834891678
1194	SETX	0.309779125752073
1195	SH3BP4	0.309720191728605
1196	TEAD1	0.309659878558791
1197	EPHA1	0.30958624061559
1198	IL17RC	0.309518702206738
1199	SREBF1	0.309437747159859
1200	RAB11FIP3	0.309373160641076
1201	TARBP2	0.309254690458431
1202	MYZAP	0.30898653544159
1203	ZZEF1	0.3083801950547
1204	RFC5	0.307434981096146
1205	DHX58	0.307317430466132
1206	DDR1	0.30719675571484
1207	MYBL1	0.307162539217268
1208	DNAJA2	0.30701334858343
1209	YWHAH	0.306667803782993
1210	PROSER2	0.306297786401965
1211	RAPGEF3	0.30562696372465
1212	FAM134B	0.305620200192653
1213	LPAR1	0.305158622865302
1214	COPZ1	0.305047502981937
1215	DECR1	0.305020113770531
1216	VASP	0.304579086972477
1217	PPP2R1A	0.304556670693376
1218	MVD	0.304543187910862
1219	TCF12	0.303852897564909
1220	HSPA4	0.303804688434056
1221	HACE1	0.303529928932523
1222	PINK1	0.30350378958066
1223	KRR1	0.303316733780855
1224	DAZAP1	0.303120478855869
1225	RIN3	0.30278997935527
1226	HERPUD1	0.302639484693539
1227	RNF144B	0.302112317393485
1228	POLR3H	0.302099582575305
1229	GPATCH2L	0.302021743827133
1230	RPS6KA1	0.301551105190671
1231	COPZ2	0.301523275164909
1232	UBFD1	0.301306856125982
1233	ETNK1	0.301177303732471
1234	PPARG	0.301005659345597
1235	RPA3	0.300829101575729
1236	RRP12	0.300737880490516
1237	EIF2S1	0.300543928373418
1238	TRIM25	0.300435075266434
1239	FAM180A	0.300137465019821
1240	FAM98A	0.299687246888715
1241	VPS8	0.299665818947317
1242	SLC5A6	0.299194236192613
1243	PTCH1	0.299077348226552
1244	RCCD1	0.298909375257695
1245	SLC39A3	0.29856087222701
1246	NFXL1	0.298407330689946
1247	PLK2	0.29840185858401
1248	USP45	0.298067217556349
1249	MAP2K6	0.297199440930519
1250	EBF4	0.297019224722494
1251	BRPF1	0.297018141901254
1252	PRPF31	0.297017009888801
1253	PIK3IP1	0.296680407717642
1254	XPO1	0.29666348014406
1255	SNAPC2	0.296619397798519
1256	HNMT	0.296481351880612
1257	SLITRK4	0.296395517583205
1258	EMILIN1	0.296318539937596
1259	ERG	0.296257199090278
1260	RAI2	0.296197260052318
1261	MCF2L	0.29607590106451
1262	MIPEP	0.295999926804092
1263	EPS8L2	0.295960897209207
1264	ECI2	0.295946739231954
1265	TRA2B	0.295395017285009
1266	KIAA1551	0.29535546191292
1267	ABCB8	0.295130073587514
1268	URI1	0.295093472559361
1269	FBXO22	0.295004580242901
1270	DFNB59	0.294836270611139
1271	C3orf17	0.294796173196969
1272	SNED1	0.29479609329402
1273	EIF2B4	0.294684985297087
1274	ST3GAL4	0.294362769483393
1275	THOP1	0.29435026295817
1276	OSBPL3	0.294298188467134
1277	CCDC174	0.293606590072871
1278	MTRF1	0.293590468885463
1279	ZNF579	0.293358664547529
1280	DDX46	0.293323833254683
1281	GRB7	0.293232098640851
1282	ZUFSP	0.293084957720394
1283	UBR1	0.293079731987724
1284	PDE8B	0.292947954082071
1285	ACBD6	0.292899907389795
1286	TMEM259	0.292653420186895
1287	EIF4E3	0.292515892260305
1288	ANO2	0.292458261370178
1289	EBF1	0.29225883567002
1290	PVR	0.292253885222469
1291	NEK6	0.291925125581309
1292	PHLDB1	0.291053115961083
1293	CYB5D1	0.291048508204888
1294	DIXDC1	0.29087970333022
1295	SUPT3H	0.290717827525459
1296	MAN1B1	0.290514017540169
1297	PRICKLE1	0.290477855239709
1298	MT1F	0.290357301066967
1299	DUSP4	0.289504036908881
1300	CRBN	0.28942638361393
1301	WAC	0.288919131540831
1302	GRAMD1C	0.288784963778085
1303	THAP2	0.288497013268408
1304	NCAM1	0.288387613031246
1305	TCF25	0.288236157410319
1306	DERL1	0.288205501215474
1307	RUNX2	0.288163105828587
1308	ADM	0.287981203567974
1309	HUWE1	0.28794381844283
1310	STRN4	0.287868530548698
1311	PIGG	0.28756855187508
1312	TMEM39A	0.287540068856986
1313	FRY	0.287351531959972
1314	S100A13	0.287100891902339
1315	EGF	0.286972893999025
1316	VPS13B	0.286651013661703
1317	PSME4	0.286600008791997
1318	AK5	0.286346362132989
1319	AFAP1L2	0.286339418624721
1320	UPF1	0.286133711389413
1321	BTBD3	0.285061446719276
1322	C1orf52	0.284955770511804
1323	PARP9	0.28491346440655
1324	MTCH2	0.284849909929586
1325	CEPT1	0.284726843410224
1326	FEZ1	0.284663028800484
1327	VCP	0.284533959170654
1328	CDC42BPB	0.284434460689903
1329	SEC11C	0.284388104467431
1330	P2RX1	0.284039702899597
1331	MAPKAPK3	0.283917234063862
1332	DDX42	0.283634067191519
1333	USP40	0.283378974260267
1334	FMNL2	0.283367680546772
1335	ELMSAN1	0.28331591316252
1336	NEK1	0.283176683321281
1337	PNMT	0.282927098217555
1338	FANCL	0.282581317213682
1339	AMOTL1	0.282551409791801
1340	EBNA1BP2	0.282524297555679
1341	TBC1D10A	0.282413129797338
1342	BRD8	0.282152004955891
1343	TMTC1	0.281978931509459
1344	LUC7L	0.281966618623157
1345	THBS4	0.281854145818018
1346	ABCA8	0.28176913999251
1347	BRD4	0.281668946143098
1348	ORAOV1	0.281648511847037
1349	RNMT	0.281646208590871
1350	PRKAR1A	0.281385864767696
1351	TSTD2	0.281303732610959
1352	FBXO42	0.281193117650967
1353	PPP2R1B	0.281086641866203
1354	MBOAT2	0.281045001479861
1355	PITPNB	0.280891949883319
1356	FHOD1	0.280212504604531
1357	SLC1A5	0.279659467932492
1358	TGFBR2	0.278930852261566
1359	OSGEPL1	0.278850914751057
1360	CDC42BPA	0.278749575008953
1361	TM9SF4	0.278734547299195
1362	TMEM132A	0.278545609252388
1363	GCFC2	0.278328229612536
1364	MYO9B	0.278017694903947
1365	PTGDS	0.277897160003176
1366	RC3H2	0.277878263814583
1367	RNASET2	0.27772065309745
1368	ZMAT1	0.277464210465728
1369	CHD9	0.277461752065569
1370	EFCAB13	0.277451927131863
1371	TMEM126B	0.27735450431539
1372	ALMS1	0.277201342823581
1373	KCTD3	0.277123544787901
1374	ZNF337	0.276901027607073
1375	GMEB2	0.27638407570821
1376	MMEL1	0.276374653652321
1377	SLTM	0.27630476265588
1378	PEG10	0.276001782113582
1379	RTKN	0.275924607103704
1380	LIG1	0.275605714509961
1381	MAPKAPK5	0.275454877100578
1382	MAEA	0.275210803454143
1383	KLK8	0.274708449828078
1384	ARRB1	0.274615548144487
1385	ACADM	0.274607586394356
1386	ATP6V0A1	0.27387677601696
1387	MLPH	0.273527961398975
1388	RARS	0.273493723907201
1389	THNSL2	0.273368921409601
1390	TOP1MT	0.2732550567179
1391	IFT140	0.273186270297011
1392	ANO8	0.27294546248394
1393	SPHK2	0.27281879735179
1394	COG4	0.272785565104813
1395	RIC8B	0.272581709435858
1396	ACSF2	0.272352283801629
1397	SIPA1	0.272249776424712
1398	IL11RA	0.272110895068256
1399	TRIM17	0.272065249053306
1400	NGLY1	0.271604442658129
1401	HS3ST1	0.271485398391307
1402	IL17RE	0.270856980766828
1403	FAM20C	0.270830052647035
1404	KDM3A	0.270769486725262
1405	ANAPC4	0.269882200870144
1406	AGAP1	0.269760429090703
1407	SMYD3	0.269746285309888
1408	NUP214	0.269237269265616
1409	ALAD	0.269130041504536
1410	SIDT1	0.269039976655967
1411	DYNC1H1	0.268881952692687
1412	MYBPC1	0.268843316683754
1413	SETDB2	0.26876228893385
1414	NRIP1	0.268648241413883
1415	MYL5	0.268513137638051
1416	CLIC3	0.268464975947174
1417	FBXL6	0.26818078495529
1418	TPPP3	0.268087221571615
1419	ACTL6A	0.268058341751173
1420	ZNF740	0.268017336977719
1421	PTPRN2	0.267870146578256
1422	VPS45	0.267726041756341
1423	MALT1	0.267647791175848
1424	CTBS	0.267619579209267
1425	OLFM1	0.267558330411275
1426	LRRC14	0.267138132806119
1427	MSC	0.267117138989956
1428	PLB1	0.267050961984405
1429	CAMTA2	0.267014202639362
1430	NOL3	0.26689090345229
1431	HOXB2	0.266641569183451
1432	PDLIM2	0.266492483696174
1433	PPP6R1	0.265805786138619
1434	TBC1D25	0.265777157346713
1435	KDM2A	0.265592873167259
1436	ARID4B	0.265580372688299
1437	ESRP1	0.265333011188412
1438	GPR133	0.265224837451524
1439	SNX33	0.265026932378933
1440	FAM73B	0.264942079435035
1441	SGCA	0.264799333795147
1442	ERF	0.264793046883974
1443	CELSR1	0.264538496237116
1444	EPB41L3	0.264515813699179
1445	PCDH1	0.264478389473351
1446	RBP5	0.26419901497451
1447	COBLL1	0.264095436309537
1448	RCOR3	0.263477892842225
1449	UNC119	0.263363299552085
1450	HIVEP3	0.263323129983777
1451	SHFM1	0.262731941860735
1452	MITD1	0.262387557093554
1453	SERP1	0.26233359569184
1454	USP15	0.261961728252621
1455	SLC39A7	0.261944739859097
1456	RAPGEF1	0.261931650400862
1457	GALNT12	0.261734242552311
1458	KALRN	0.261729071096043
1459	ARHGEF9	0.261692041774734
1460	AAGAB	0.261599769456172
1461	DRAP1	0.261596656670268
1462	CHD1L	0.26152683740209
1463	LMAN2	0.261512608770988
1464	CCDC109B	0.261309272173746
1465	SH2D3C	0.261175376539607
1466	LDLRAD4	0.26113846561351
1467	WDFY2	0.260920551158018
1468	BCL2L1	0.260887008435146
1469	PEA15	0.260610159867396
1470	TSPAN8	0.260316759332631
1471	CGGBP1	0.259847607104399
1472	CD53	0.259724620563468
1473	MID2	0.259597732207626
1474	WISP2	0.259532654430856
1475	SH3PXD2A	0.259170564069958
1476	OPA1	0.25916422820896
1477	SYNE1	0.258803358700597
1478	BCOR	0.258780076134222
1479	RPRD2	0.258755175185339
1480	CLSTN1	0.258607277924315
1481	BCAR3	0.25854651587223
1482	C9orf72	0.258386616894136
1483	ALDOA	0.258339899592517
1484	PLA2G2A	0.258204976448485
1485	GPR137B	0.258167384039764
1486	TTYH3	0.25811695035374
1487	PPP5C	0.258103842909621
1488	NUDT7	0.258097894641443
1489	SHMT2	0.258058812285853
1490	TBKBP1	0.258049240909309
1491	XPO5	0.257947131145978
1492	LTBP1	0.257795349998433
1493	TFG	0.257596656043003
1494	MOGS	0.257152180362887
1495	SEC23IP	0.256886727132183
1496	NUDT16L1	0.256648797168755
1497	FAR2	0.256467563511077
1498	IFI16	0.256277232524409
1499	NAB2	0.256262626700749
1500	BBS7	0.256221954882243
1501	MTMR4	0.256205559735057
1502	SLC35A2	0.256083324776424
1503	RRNAD1	0.255993243857535
1504	SLC27A3	0.255969983803706
1505	PRPF39	0.255732715249527
1506	LARP4B	0.255277099151844
1507	FAM20A	0.255120785690442
1508	CLEC10A	0.255075061041827
1509	IPO11	0.254980772211364
1510	HHEX	0.254704261381971
1511	HOXA3	0.254200520100919
1512	DLG3	0.254026010673717
1513	DHX37	0.253058172481237
1514	ZDHHC13	0.252434450466817
1515	ATF7IP	0.252379818282539
1516	ARHGAP10	0.252372106937103
1517	PPFIA3	0.252190948362728
1518	ALKBH7	0.252097756876304
1519	HNRNPLL	0.252018158249976
1520	UBXN6	0.251885857849205
1521	STX4	0.251841457247689
1522	ITM2B	0.251356821756861
1523	CDKN2B	0.251280601338587
1524	COG5	0.251001989008269
1525	WRB	0.250930088621973
1526	MRPS25	0.250815362518731
1527	EGLN2	0.250778854120967
1528	PTPRB	0.250491114943391
1529	ALOX15B	0.25026476922094
1530	SEMA6A	0.250170469806204
1531	SNRNP25	0.250102253164414
1532	CMIP	0.249984062946807
1533	HARS2	0.249932095179785
1534	MNT	0.249746033316936
1535	DHX16	0.249723530154144
1536	RNPEP	0.248925111514802
1537	CPSF3	0.248847732099767
1538	COL27A1	0.248678699106421
1539	BCKDK	0.248515238698108
1540	RBM42	0.248514508594715
1541	CISD3	0.247817922139099
1542	CRHBP	0.247562776957164
1543	RAB11FIP5	0.247535554046926
1544	RNF146	0.247319791011655
1545	WIPF1	0.247047406741307
1546	TMEM248	0.246878697819485
1547	ADORA3	0.246835938621391
1548	PEX19	0.246479333865769
1549	MBNL3	0.246355880674294
1550	NAT10	0.24631043376224
1551	MTERFD2	0.246258289154342
1552	PLAT	0.246220752687172
1553	AASDH	0.246159008787489
1554	RBFOX2	0.246132986783173
1555	CTTN	0.246023366564263
1556	HN1L	0.245896582250518
1557	SYT8	0.245856824555112
1558	STAT6	0.245659006643238
1559	PPT2	0.245636381851198
1560	TFPT	0.245436346371977
1561	HECTD3	0.245340394680212
1562	C1orf198	0.24492790701959
1563	LMAN2L	0.244854627376916
1564	CHI3L2	0.2448312865008
1565	PRPF38B	0.244644355072791
1566	TMEM2	0.24406110479841
1567	C16orf89	0.244057674388018
1568	MIS18BP1	0.243574091597371
1569	ATP1A1	0.243396105712483
1570	AJUBA	0.243305213201565
1571	TBC1D23	0.243297200386243
1572	CNR1	0.242818094217573
1573	BAZ1A	0.242608473420617
1574	EPB41L5	0.24256141577495
1575	CRAMP1L	0.242045149718643
1576	WDR61	0.241850088680036
1577	FAM129B	0.241828371537412
1578	NIT2	0.241772331391956
1579	RGAG4	0.241638082932662
1580	MDK	0.241532106239396
1581	HEXB	0.241281953533735
1582	DOCK2	0.241169435605716
1583	CEP70	0.241114051988026
1584	VIPR1	0.24109855531086
1585	WNK2	0.240948891680784
1586	COG1	0.240878317058963
1587	ULK3	0.240678811484096
1588	NLRX1	0.240408907208794
1589	CYLD	0.240360615058502
1590	PQBP1	0.240269155829444
1591	ERCC2	0.24014982523136
1592	TRADD	0.240085605436549
1593	USP53	0.239785798809522
1594	STK32C	0.239443531081487
1595	SLC15A4	0.239409262949046
1596	MAPK3	0.239322878938006
1597	LOXL1	0.239264787137527
1598	PPCDC	0.239161015970077
1599	LRIF1	0.238653912311735
1600	PLD1	0.238652442946867
1601	PLSCR4	0.238360286426905
1602	TCHP	0.238236427947375
1603	PPP2R3C	0.238197480173495
1604	C7orf49	0.238193926049402
1605	POC1B	0.238141600709561
1606	BACE1	0.238025668496713
1607	WARS2	0.238022856144282
1608	SMPDL3A	0.237715278023017
1609	NCS1	0.237548614689457
1610	LTBP4	0.237226126938635
1611	IPO13	0.237167129943649
1612	STK38L	0.236988349608967
1613	NDFIP2	0.236784309719598
1614	HLA-DMB	0.2367425145339
1615	GRB14	0.236680034523327
1616	DHX57	0.23661287020241
1617	SPATA20	0.236469742211303
1618	RNF19A	0.236226184251877
1619	DHX8	0.236225475275782
1620	TUBE1	0.236192098063379
1621	IER3	0.235893036517572
1622	NT5DC2	0.235767437036303
1623	FAM104A	0.235500143508513
1624	MTMR11	0.23535075077392
1625	SSFA2	0.235060303077345
1626	DIMT1	0.234994049475412
1627	GAREM	0.234920356094726
1628	FGFR3	0.234786096546541
1629	TANC2	0.23474525885265
1630	DENND2D	0.234652674954371
1631	SCAF4	0.234506879023694
1632	TESK1	0.234458565572173
1633	CDK13	0.234390728904609
1634	C6orf1	0.233996362063789
1635	BATF2	0.233571308570208
1636	DDX24	0.233525628321469
1637	TEF	0.233292049313835
1638	IFI44L	0.233232017115472
1639	CAB39L	0.233124187238714
1640	KIFC3	0.232940397786112
1641	TMBIM6	0.232730761283826
1642	COL4A6	0.232724884607139
1643	USP46	0.232630175599189
1644	ARID1A	0.232286940110807
1645	SULF1	0.232216327266568
1646	CLMN	0.232185158426634
1647	CHAMP1	0.232139182289066
1648	ZFC3H1	0.23210316790543
1649	ENTHD2	0.231872899740525
1650	AES	0.231718346604935
1651	XPC	0.23164975274847
1652	TNRC6B	0.231565805130544
1653	TEFM	0.231510037442828
1654	CLPTM1	0.23127802847068
1655	PUM1	0.23100889330357
1656	HCCS	0.230731529932771
1657	TRIM47	0.23072548014645
1658	PPM1G	0.230472495639244
1659	ABCB6	0.230233660099133
1660	KLHL29	0.230117392610542
1661	NT5C	0.230015138412247
1662	COQ9	0.229619125067737
1663	ZFP62	0.229582206465948
1664	PTPN6	0.229459529929695
1665	TOLLIP	0.229359016495376
1666	NFKBIA	0.228950162694831
1667	OSBPL1A	0.228840200419361
1668	CHST11	0.228724992535085
1669	SDC2	0.228720623290982
1670	TCEB3	0.228717137787668
1671	NCEH1	0.228623506593896
1672	PNKD	0.228599336588058
1673	HERC3	0.228176469850349
1674	DENND1C	0.227892939114091
1675	CAPN1	0.227871579417991
1676	FBXW7	0.227390615945801
1677	UNC45A	0.227385951398897
1678	STK3	0.227319278728447
1679	CDC42EP5	0.227079922762261
1680	TDRD7	0.226741509931014
1681	ADCY5	0.226600912996676
1682	PJA1	0.226430344241375
1683	TRAPPC5	0.226212808166907
1684	COL4A5	0.226085586658414
1685	PIGT	0.22599569807239
1686	EIF4G1	0.225717151083526
1687	WIBG	0.225572751666851
1688	WDYHV1	0.22494494401412
1689	HR	0.224230420964152
1690	AP3D1	0.2242121984494
1691	IL1RL1	0.224125587984222
1692	C21orf59	0.224102291552798
1693	PRKCH	0.224088853750759
1694	RAB31	0.223961264932222
1695	MCOLN1	0.223917337998706
1696	NOSTRIN	0.223864775973501
1697	MAPRE3	0.223765017428322
1698	CCM2	0.223476404678997
1699	GDPD3	0.223462821039176
1700	ACAD11	0.223446832255268
1701	ATOH8	0.223311426880139
1702	GPT2	0.223196323652996
1703	VPS13A	0.222892479563947
1704	CAPN7	0.222698460609719
1705	LPHN2	0.222511718267938
1706	MRPS14	0.222437192644473
1707	PTGER3	0.222359287018257
1708	LYNX1	0.222275372987541
1709	MRC2	0.222121376403297
1710	CHKA	0.221964696743563
1711	GCLC	0.221934184756276
1712	HOXB6	0.221853819898013
1713	PPME1	0.221566419261908
1714	PHF8	0.221423359309237
1715	TOP2B	0.220851053733592
1716	USP25	0.220821579689704
1717	EML1	0.220677531597295
1718	TMEM5	0.220415975541807
1719	ARID5B	0.220132660210248
1720	NPR2	0.219999986076699
1721	ACD	0.219878779148933
1722	FIZ1	0.219711300047115
1723	TBX15	0.219683130321554
1724	SFRP4	0.219651247585866
1725	TRIM41	0.219622780048682
1726	PCTP	0.219531591258778
1727	SIL1	0.219302016344371
1728	SCO2	0.219297243189219
1729	GNPAT	0.219116831366739
1730	RRP1B	0.219106431768896
1731	RASAL2	0.218743298305812
1732	LRRK1	0.218722670660729
1733	C1QTNF7	0.218712766051586
1734	CBLL1	0.218620899158924
1735	SLCO2B1	0.218328569952183
1736	ACSL5	0.218145795863309
1737	NRXN2	0.218052472367101
1738	CTSA	0.217966699748297
1739	PIGQ	0.217953093649651
1740	C1orf122	0.217795360574622
1741	CGN	0.217652533048729
1742	TREM1	0.217638983635356
1743	SNX24	0.2174706740077
1744	ATG4B	0.216689003315229
1745	NENF	0.216535795190917
1746	ARHGEF11	0.216529359769955
1747	EIF2B5	0.216526630644073
1748	EPS15L1	0.216433480354047
1749	ARF3	0.216214310046542
1750	MARCH5	0.216190335391003
1751	HSPB11	0.216164709173687
1752	HDC	0.216053784750497
1753	NUDCD3	0.215970700471097
1754	TBCD	0.215488594249584
1755	MAGED1	0.215413779049903
1756	NAA30	0.215087921326689
1757	CLDN7	0.214928898023328
1758	APBB1	0.214922167702416
1759	HMGXB4	0.214787019708037
1760	ARMC7	0.21440070192919
1761	ARHGAP12	0.214265240693308
1762	CWC15	0.214139202056201
1763	IQGAP1	0.213826639171649
1764	LST1	0.213734810114307
1765	ZBTB16	0.213708675928452
1766	SYNE2	0.213510262103643
1767	ODF3B	0.213147529168056
1768	FERMT2	0.213108001736394
1769	TRAPPC12	0.213031726841308
1770	CFD	0.21285117515173
1771	STIM2	0.212759704150207
1772	AVPR1A	0.212714673094306
1773	NRG2	0.212637376952583
1774	RAPGEF5	0.212561427089401
1775	CLEC12A	0.2125480726232
1776	MFSD2A	0.212300595493383
1777	WRN	0.211971424803098
1778	PRDM1	0.211967227894979
1779	C1QTNF1	0.211806977335828
1780	TEKT3	0.211774884584188
1781	PPIL2	0.211727643066198
1782	TNFSF8	0.211482284296225
[truncated: 4,866 more rows]

## Sheet: Group2 (IR-IR)
rank	hub	r
[truncated: 7,191 more rows]

## Sheet: Group3 (TE-TE)
rank	hub	r
[truncated: 9,917 more rows]

[truncated: 15 more sheets: Group3 (TE-IR), Group3 (IR-TE), Group3 (IR-IR), Group4 (TE-TE), Group4 (TE-IR), Group4 (IR-TE), Group4 (IR-IR), Group5 (TE-TE), Group5 (TE-IR), Group6 (TE-TE), Group5 (IR-TE), Group5 (IR-IR), Group6 (TE-IR), Group6 (IR-TE), Group6 (IR-IR)]
