# Supplementary material for: Co-expression networks reveal the tissue-specific regulation of transcription and splicing
Source: Genome Res. 2017 Nov;27(11):1843–58. doi: 10.1101/gr.216721.116 (PMC5668942; doi:10.1101/gr.216721.116)
Supplement: Supplemental Material [file supp_gr.216721.116_Supplemental_Data_S5.xlsx]

## Sheet: 20kb from TSS
tissue	variant_id	gene_name	transcript_id	sqtl_beta	sqtl_t_stat	sqtl_pvalue_nominal	sqtl_fdr_bh	edge_weight	gene_id	gene_chr	gene_start	gene_end	snp_chr	snp_pos	ref	alt	rs_id_dbSNP135_original_VCF	rs_id_dbSNP142_GRCh37p13	num_alt_per_site	transcript_gene_name	transcript_gene_id	transcript_chr	transcript_start	transcript_end	transcript_name
Muscle-Skeletal	19_3922286_GAA_G_b37	NMRK2	ENST00000528430.1	0.415606	4.87307	1.65911e-06	0.100105	-0.0188181	ENSG00000077009.9	19	3933101	3942414	19	3922286	GAA	G	chr19_3922286_D	rs397828484	1	PPP1R16A	ENSG00000160972.5	8	145726472	145727503	PPP1R16A-014
Muscle-Skeletal	4_56397978_G_A_b37	CLOCK	ENST00000340875.5	0.33824	4.64448	4.80904e-06	0.100105	-0.0198538	ENSG00000134852.10	4	56294070	56413305	4	56397978	G	A	rs7668429	rs7668429	1	MEF2D	ENSG00000116604.13	1	156433522	156470529	MEF2D-201
Muscle-Skeletal	12_54134319_G_C_b37	CALCOCO1	ENST00000409273.1	0.827849	4.48376	9.91321e-06	0.107042	0.0444482	ENSG00000012822.11	12	54104903	54121529	12	54134319	G	C	rs7980880	rs7980880	1	XIRP2	ENSG00000163092.15	2	168043793	168116259	XIRP2-005
Muscle-Skeletal	16_1654948_G_A_b37	CRAMP1L	ENST00000396435.3	0.384165	4.39988	1.43421e-05	0.141959	-0.0292163	ENSG00000007545.11	16	1662326	1727909	16	1654948	G	A	rs56359342	rs56359342	1	IQSEC2	ENSG00000124313.8	X	53262058	53350522	IQSEC2-012
Muscle-Skeletal	3_9970121_C_T_b37	CRELD1	ENST00000531388.1	0.890129	4.30276	2.18386e-05	0.192144	0.0120811	ENSG00000163703.13	3	9975506	9987097	3	9970121	C	T	rs115419420	rs115419420	1	CARNS1	ENSG00000172508.6	11	67183667	67193076	CARNS1-003
Adipose-Visceral_Omentum_	20_62139177_A_G_b37	PPDPF	ENST00000496440.1	-0.763529	-5.08832	9.07568e-07	0.0948561	-0.0272638	ENSG00000125534.5	20	62152077	62153559	20	62139177	A	G	rs6122466	rs6122466	1	CEP350	ENSG00000135837.11	1	180064282	180080166	CEP350-006

## Sheet: best variant per gene
tissue	variant_id	transcript_id	sqtl_beta	sqtl_t_stat	sqtl_pvalue_nominal	sqtl_fdr_bh	gene_name	edge_weight	gene_id	gene_chr	gene_start	gene_end	strand	num_var	beta_shape1	beta_shape2	true_df	tss_distance	snp_chr	snp_pos	ref	alt	rs_id_dbSNP142_GRCh37p13	num_alt_per_site	minor_allele_samples	minor_allele_count	maf	ref_factor	pval_nominal	slope	slope_se	pval_perm	pval_beta	qval	pval_nominal_threshold	transcript_gene_name	transcript_gene_id	transcript_chr	transcript_start	transcript_end	transcript_name
Adipose-Subcutaneous	15_75136261_C_G_b37	ENST00000566479.1	-0.852744971705544	-11.170736374616	2.39081501019292e-24	3.279720030982647e-20	FAM219B	0.0204069177038987	ENSG00000178761.10	15	75192328	75199462	-	4557	1.05817	456.64099999999996	216.275	-63201	15	75136261	C	G	rs6938	1	201	259	0.434564	-1	7.3318700000000005e-06	0.191797	0.0418961	0.012898699999999999	0.013168700000000002	0.019047	0.000116899	ULK3	ENSG00000140474.8	15	75128459	75135470	ULK3-006
Adipose-Subcutaneous	11_47541490_T_TA_b37	ENST00000302503.3	-0.560871447576198	-6.47384425919813	4.05158068911942e-10	2.77897919466701e-06	C1QTNF4	-0.0823948124461413	ENSG00000172247.3	11	47611216	47616211	-	5140	1.0471700000000002	220.482	207.138	-74721	11	47541490	T	TA	rs71042677	1	168	191	0.32047	1	2.73932e-32	-0.620683	0.0454276	9.999e-05	3.3608899999999994e-25	6.05652e-24	0.000233377	MTCH2	ENSG00000109919.5	11	47638868	47664175	MTCH2-001
Adipose-Subcutaneous	20_30963491_TG_T_b37	ENST00000398022.2	0.43251703489381	4.81878959084051	2.32882163405551e-06	0.010648925058657827	C20orf112	-0.0330588281207789	ENSG00000197183.8	20	31030862	31172876	-	5122	1.05944	453.945	215.45	-209385	20	30963491	TG	T	rs146444980	1	155	194	0.32550300000000004	1	6.489979999999999e-05	0.19735	0.048592199999999995	0.090391	0.0912083	0.0895885	0.00011808600000000001	TM9SF4	ENSG00000101337.11	20	30697309	30755061	TM9SF4-002
Adipose-Subcutaneous	1_208924554_C_T_b37	ENST00000395566.4	-0.546892506851524	-4.477577249419769	1.0852730208532499e-05	0.037219438250162204	CD34	0.0046840949436783704	ENSG00000174059.12	1	208057594	208084747	-	6329	1.05294	678.539	219.675	839807	1	208924554	C	T	rs13375803	1	69	77	0.129195	1	1.93611e-05	0.19081800000000002	0.0438279	0.0411959	0.041923400000000006	0.049202800000000005	7.73217e-05	MDK	ENSG00000110492.11	11	46403226	46405356	MDK-005
Adipose-Visceral_Omentum_	20_62152519_C_G_b37	ENST00000496440.1	-0.751027077342167	-4.9831129399628695	1.46813969074273e-06	0.009893793375915257	PPDPF	-0.0272638420631231	ENSG00000125534.5	20	62152077	62153559	+	7122	1.05031	988.1210000000001	129.659	442	20	62152519	C	G	rs72629024	1	48	53	0.143243	1	2.15875e-15	-0.6996220000000001	0.0788556	9.999e-05	3.51241e-11	6.40254e-10	2.20706e-05	CEP350	ENSG00000135837.11	1	180064282	180080166	CEP350-006
Adipose-Visceral_Omentum_	19_5277089_G_C_b37	ENST00000263461.6	-0.5126051883713421	-4.65055597602638	6.41158875619923e-06	0.021603848314013303	PTPRS	-0.00938867205280123	ENSG00000105426.10	19	5158506	5340814	-	6790	1.0695	1000.09	130.32399999999998	-63725	19	5277089	G	C	rs4992198	1	111	129	0.348649	1	0.000105629	-0.249681	0.06265710000000001	0.20932699999999999	0.21232600000000001	0.260523	2.35717e-05	WDR11	ENSG00000120008.11	10	122610687	122669036	WDR11-001
Artery-Aorta	16_649672_T_C_b37	ENST00000026218.5	1.14370457530124	11.7323762991425	2.7387996476023704e-24	8.650772566916847e-20	RAB40C	-0.0486110952253707	ENSG00000197562.5	16	639357	679272	+	6255	1.0355299999999998	884.705	140.438	10315	16	649672	T	C	rs35238369	1	74	82	0.20812199999999997	1	1.12467e-15	0.48766099999999996	0.054769500000000006	9.999e-05	2.30965e-11	2.3881e-10	3.88332e-05	PIGQ	ENSG00000007541.10	16	620018	634109	PIGQ-002
Artery-Aorta	14_75483812_T_C_b37	ENST00000554697.1	-0.867008145585784	-11.2132399955954	9.552185080691579e-23	1.508576589793621e-18	EIF2B2	0.017844415023701998	ENSG00000119718.6	14	75469614	75476292	+	4391	1.0407799999999998	427.958	138.344	14198	14	75483812	T	C	rs13712	1	144	197	0.5	1	6.906699999999999e-19	0.393777	0.0389524	9.999e-05	1.90194e-14	2.7669699999999996e-13	8.18664e-05	MLH3	ENSG00000119684.11	14	75482190	75489721	MLH3-010
Artery-Aorta	16_649672_T_C_b37	ENST00000321878.5	-1.0365116653039699	-10.091443128418199	1.82796497066173e-19	1.9246033854440466e-15	RAB40C	0.0347673918516122	ENSG00000197562.5	16	639357	679272	+	6255	1.0355299999999998	884.705	140.438	10315	16	649672	T	C	rs35238369	1	74	82	0.20812199999999997	1	1.12467e-15	0.48766099999999996	0.054769500000000006	9.999e-05	2.30965e-11	2.3881e-10	3.88332e-05	PIGQ	ENSG00000007541.10	16	619947	634136	PIGQ-001
Artery-Aorta	11_780319_G_GTC_b37	ENST00000530398.1	0.6476223343482149	7.416842440326031	3.8141033410857e-12	3.011806703288323e-08	AP006621.5	0.0109371415420847	ENSG00000255284.1	11	777578	784297	+	6852	1.0576	851.638	138.844	2741	11	780319	G	GTC	rs200817511	1	137	184	0.467005	-1	5.44027e-33	-0.679809	0.044585900000000005	9.999e-05	2.27531e-27	1.36855e-25	4.3759799999999994e-05	RPLP2	ENSG00000177600.4	11	810269	812871	RPLP2-009
Artery-Aorta	7_24772641_G_C_b37	ENST00000222644.5	-0.615523275503018	-6.7250211851362005	1.9801376453463301e-10	1.2508925533181836e-06	DFNA5	0.00966725584844918	ENSG00000105928.9	7	24737972	24809244	-	7661	1.05807	602.409	134.453	-36603	7	24772641	G	C	rs2521765	1	140	188	0.477157	1	5.54793e-10	0.48868100000000003	0.07397089999999999	9.999e-05	3.896819999999999e-06	1.81271e-05	6.19679e-05	MPP6	ENSG00000105926.11	7	24612965	24733812	MPP6-001
Artery-Aorta	16_713210_G_A_b37	ENST00000321878.5	-0.6550652998685179	-6.04883182162416	7.54337101470833e-09	3.971081947842954e-05	RHBDL1	0.0045110521371662105	ENSG00000103269.9	16	725666	728268	+	6428	1.0506799999999998	871.4810000000001	139.266	-12456	16	713210	G	A	rs9937980	1	133	162	0.41116800000000003	1	3.22411e-09	0.319206	0.050911	9.999e-05	1.68659e-05	6.978090000000001e-05	4.1700100000000004e-05	PIGQ	ENSG00000007541.10	16	619947	634136	PIGQ-001
Artery-Aorta	11_12038874_G_A_b37	ENST00000305481.6	0.605175715371014	5.908102783705879	1.56122031040805e-08	7.044672103506952e-05	DKK3	-0.359785097450813	ENSG00000050165.13	11	11984653	12031316	-	7183	1.0133	1080.12	143.016	7558	11	12038874	G	A	rs11022114	1	98	117	0.296954	1	1.98007e-23	0.6472859999999999	0.0550006	9.999e-05	2.6351499999999998e-18	5.83778e-17	2.9211999999999997e-05	USP47	ENSG00000170242.13	11	11971990	11980701	USP47-005
Artery-Aorta	12_58328500_G_A_b37	ENST00000350762.5	0.48300540215477794	4.79016111095892	3.3365973181698997e-06	0.013173720361464306	XRCC6BP1	0.0024418912774566	ENSG00000166896.3	12	58335324	58351052	+	4658	1.0639399999999999	345.065	135.25	-6824	12	58328500	G	A	rs10877041	1	96	115	0.291878	1	8.63196e-52	-1.07149	0.0472991	9.999e-05	4.1053e-44	2.0876399999999994e-41	0.000110484	TSFM	ENSG00000123297.12	12	58176564	58190549	TSFM-201
Artery-Aorta	19_54653998_G_GC_b37	ENST00000422605.2	-0.47685559101284003	-4.69915381270692	4.98769746883844e-06	0.017504601361192328	CNOT3	-0.00485659409330804	ENSG00000088038.13	19	54641444	54658192	+	10263	1.0331700000000001	1374.1	137.641	12554	19	54653998	G	GC	rs36084535	1	121	148	0.375635	1	0.000159887	-0.146575	0.0379031	0.448879	0.45560500000000004	0.305562	2.47817e-05	AMOTL2	ENSG00000114019.10	3	134074719	134093289	AMOTL2-014
Artery-Aorta	1_109912051_A_G_b37	ENST00000308982.7	-0.963560463183769	-4.6746162560766695	5.5534572999465895e-06	0.017541150227611296	SYPL2	-0.0340133751616302	ENSG00000143028.7	1	110009180	110024759	+	5120	1.0549899999999999	573.24	138.625	-97129	1	109912051	A	G	rs17646665	1	23	24	0.060913699999999994	1	8.07277e-25	-1.22665	0.09995599999999999	9.999e-05	5.783859999999999e-20	1.58208e-18	6.439810000000001e-05	ACAD9	ENSG00000177646.13	3	128598454	128631957	ACAD9-001
Artery-Aorta	2_48822381_G_A_b37	ENST00000219548.4	0.46935004595267893	4.55270591805059	9.414172802151e-06	0.02347259687266654	GTF2A1L	-0.0273465321268942	ENSG00000242441.3	2	48844937	48960287	+	6542	1.05865	414.029	132.234	-22556	2	48822381	G	A	rs2140551	1	143	180	0.45685299999999995	-1	2.9338199999999997e-44	1.05872	0.0541509	9.999e-05	3.21733e-36	4.99916e-34	9.03487e-05	STUB1	ENSG00000103266.6	16	730276	732799	STUB1-001
Artery-Aorta	1_160108620_AG_A_b37	ENST00000563957.2	0.44970018062515205	4.56081461419421	9.092267546002021e-06	0.02347259687266654	CD48	-0.0206705803416228	ENSG00000117091.5	1	160648536	160681641	-	5605	1.04359	707.9989999999999	141.5	-573021	1	160108620	AG	A	rs201221650	1	144	195	0.494924	1	7.2128199999999995e-06	0.25301599999999996	0.054530499999999996	0.0126987	0.014156100000000001	0.0276535	5.00058e-05	SEPT1	ENSG00000180096.7	16	30389458	30394134	SEPT1-002
Artery-Aorta	10_75713993_A_AT_b37	ENST00000581729.1	-0.5150681763125511	-4.5466738286583	9.6607281499609e-06	0.02347259687266654	VCL	-0.0176820995068661	ENSG00000035403.12	10	75757872	75879918	+	3469	1.03411	178.69099999999997	135.781	-43879	10	75713993	A	AT	rs147464109	1	80	98	0.248731	1	2.9336100000000002e-05	-0.17740999999999998	0.0412369	0.0166983	0.018171400000000004	0.0339784	0.000191211	CTC1	ENSG00000178971.9	17	8131300	8132723	CTC1-013
Artery-Aorta	11_74695212_A_G_b37	ENST00000478425.1	-0.522148659276061	-4.41466277737551	1.6904580733821698e-05	0.03813914907560658	XRRA1	0.0547665533404643	ENSG00000166435.11	11	74518784	74660245	-	4777	1.05986	400.629	136.469	34967	11	74695212	A	G	rs10793108	1	96	105	0.266497	1	7.616239999999998e-73	1.2784200000000001	0.0390281	9.999e-05	2.5533499999999995e-63	4.7609399999999994e-60	9.377860000000001e-05	STIM2	ENSG00000109689.10	4	26859870	26860541	STIM2-009
Artery-Tibial	11_534242_A_G_b37	ENST00000397604.3	0.8916975461134	12.503746799721197	8.77195903364213e-29	1.6137773034191426e-24	HRAS	0.0321463391561327	ENSG00000174775.12	11	532242	537287	-	6025	1.04348	732.44	209.208	-3045	11	534242	A	G	rs12628	1	152	187	0.32807	1	3.48362e-17	-0.281775	0.030981400000000003	9.999e-05	1.21304e-12	7.70456e-12	6.9335e-05	RNH1	ENSG00000023191.12	11	494515	507253	RNH1-003
Artery-Tibial	15_75258773_T_C_b37	ENST00000561725.1	0.773596120811724	12.396731995548802	2.0769309624544997e-28	1.9104649458137715e-24	SCAMP5	0.0375399848491138	ENSG00000198794.7	15	75249806	75313837	+	4376	1.05284	459.19300000000004	207.77200000000002	8967	15	75258773	T	C	rs34799293	1	199	258	0.452632	1	2.0519e-17	-0.507031	0.0552808	9.999e-05	4.4877600000000005e-13	2.95352e-12	0.000114117	ULK3	ENSG00000140474.8	15	75128459	75135480	ULK3-004
Artery-Tibial	16_649672_T_C_b37	ENST00000026218.5	0.983802485665313	11.6135391366255	1.06589713520489e-25	6.536436532121453e-22	RAB40C	-0.0977531139223377	ENSG00000197562.5	16	639357	679272	+	7134	1.05413	1009.69	210.18099999999998	10315	16	649672	T	C	rs35238369	1	99	114	0.2	1	2.11553e-24	0.460446	0.0403865	9.999e-05	2.82983e-19	3.2955e-18	5.21253e-05	PIGQ	ENSG00000007541.10	16	620018	634109	PIGQ-002
Artery-Tibial	15_75258773_T_C_b37	ENST00000566479.1	-0.653588997670845	-9.002431348069331	3.52874785334465e-17	1.6229593564495383e-13	SCAMP5	-0.0056697677874158895	ENSG00000198794.7	15	75249806	75313837	+	4376	1.05284	459.19300000000004	207.77200000000002	8967	15	75258773	T	C	rs34799293	1	199	258	0.452632	1	2.0519e-17	-0.507031	0.0552808	9.999e-05	4.4877600000000005e-13	2.95352e-12	0.000114117	ULK3	ENSG00000140474.8	15	75128459	75135470	ULK3-006
Artery-Tibial	11_780827_C_T_b37	ENST00000321153.4	0.623668361228777	8.28524719535322	4.99115288760419e-15	1.8364447934650855e-11	AP006621.5	-0.0273138770163423	ENSG00000255284.1	11	777578	784297	+	7414	1.08162	929.424	208.365	3249	11	780827	C	T	rs4963156	1	185	245	0.429825	1	8.163760000000001e-42	0.7689729999999999	0.0463767	9.999e-05	8.80485e-36	3.59509e-34	6.19165e-05	RPLP2	ENSG00000177600.4	11	809647	812875	RPLP2-001
Artery-Tibial	19_47530947_G_C_b37	ENST00000398409.1	0.559263918984182	5.485379694105901	9.253930385087471e-08	0.00024792552040245417	TMEM160	0.0392717738480138	ENSG00000130748.6	19	47549165	47551888	-	6621	1.05574	969.888	214.25099999999998	-20941	19	47530947	G	C	rs113305055	1	178	209	0.366667	1	1.80949e-05	-0.2805	0.0641262	0.0412959	0.0445972	0.05177919999999999	5.4555e-05	CST3	ENSG00000101439.4	20	23614294	23619110	CST3-003
Artery-Tibial	19_47530947_G_C_b37	ENST00000376925.3	-0.5584042892076011	-5.4816146670035195	9.43348721431309e-08	0.00024792552040245417	TMEM160	-0.0460963183504428	ENSG00000130748.6	19	47549165	47551888	-	6621	1.05574	969.888	214.25099999999998	-20941	19	47530947	G	C	rs113305055	1	178	209	0.366667	1	1.80949e-05	-0.2805	0.0641262	0.0412959	0.0445972	0.05177919999999999	5.4555e-05	CST3	ENSG00000101439.4	20	23614285	23618663	CST3-001
Artery-Tibial	3_21831940_T_A_b37	ENST00000347557.2	0.47867330859411406	4.8511971042713	2.0433257973583e-06	0.00469888308675008	ZNF385D	-0.275154071477184	ENSG00000151789.5	3	21459915	22414812	-	9405	1.03673	917.46	212.435	-582872	3	21831940	T	A	rs55794313	1	104	118	0.20701799999999998	1	4.28235e-08	0.301575	0.0532956	0.00019998	0.00020213099999999998	0.000445086	5.4096899999999994e-05	SMTN	ENSG00000183963.14	22	31477305	31500610	SMTN-001
Artery-Tibial	16_57302162_A_G_b37	ENST00000343575.6	0.923457018581245	4.63448340214898	5.49935273731663e-06	0.011241288034268227	MMP15	0.00949502835369812	ENSG00000102996.4	16	58059470	58080805	+	8213	1.0608799999999998	1084.48	215.449	-757308	16	57302162	A	G	rs76335253	1	28	28	0.0491228	1	0.000107214	-0.408217	0.103651	0.227293	0.224696	0.167428	4.96253e-05	CXCL12	ENSG00000107562.12	10	44872581	44880540	CXCL12-001
Artery-Tibial	11_12038874_G_A_b37	ENST00000539466.1	-0.41962162114289797	-4.48540143338462	1.0645516113492698e-05	0.019584555993992517	DKK3	0.0997553149587844	ENSG00000050165.13	11	11984653	12031316	-	8329	1.07264	1242.23	213.25400000000002	7558	11	12038874	G	A	rs11022114	1	131	156	0.27368400000000004	1	1.6201e-31	0.6697770000000001	0.0494482	9.999e-05	1.6033000000000002e-26	3.24013e-25	4.5013900000000006e-05	USP47	ENSG00000170242.13	11	11863522	11977952	USP47-201
Artery-Tibial	19_47530947_G_C_b37	ENST00000501501.2	-0.46222604636301	-4.45566166343149	1.21201892219008e-05	0.020270465555937183	TMEM160	-0.0215889660273165	ENSG00000130748.6	19	47549165	47551888	-	6621	1.05574	969.888	214.25099999999998	-20941	19	47530947	G	C	rs113305055	1	178	209	0.366667	1	1.80949e-05	-0.2805	0.0641262	0.0412959	0.0445972	0.05177919999999999	5.4555e-05	PPP1R9B	ENSG00000108819.9	17	48211105	48227991	PPP1R9B-001
Artery-Tibial	17_48624523_A_C_b37	ENST00000370507.1	-0.37743474781578995	-4.38271559980945	1.66133851863892e-05	0.023510495944154008	SPATA20	-0.008508381427743671	ENSG00000006282.15	17	48623667	48633213	+	5721	1.0667200000000001	811.2869999999999	211.438	856	17	48624523	A	C	rs9890200	1	180	231	0.405263	1	7.978119999999999e-67	-0.652829	0.0269219	9.999e-05	4.014479999999999e-59	9.3393e-57	6.76139e-05	SLCO4A1	ENSG00000101187.11	20	61287711	61303645	SLCO4A1-006
Artery-Tibial	19_47530947_G_C_b37	ENST00000394773.2	-0.448005474650934	-4.39758633388092	1.55841898667203e-05	0.023510495944154008	TMEM160	-0.0274515765742432	ENSG00000130748.6	19	47549165	47551888	-	6621	1.05574	969.888	214.25099999999998	-20941	19	47530947	G	C	rs113305055	1	178	209	0.366667	1	1.80949e-05	-0.2805	0.0641262	0.0412959	0.0445972	0.05177919999999999	5.4555e-05	EML3	ENSG00000149499.7	11	62369690	62380237	EML3-001
Artery-Tibial	19_47530947_G_C_b37	ENST00000338343.4	-0.445777823841289	-4.2922294984680995	2.44262907238112e-05	0.03209789074613962	TMEM160	-0.0174933838492863	ENSG00000130748.6	19	47549165	47551888	-	6621	1.05574	969.888	214.25099999999998	-20941	19	47530947	G	C	rs113305055	1	178	209	0.366667	1	1.80949e-05	-0.2805	0.0641262	0.0412959	0.0445972	0.05177919999999999	5.4555e-05	FBXL19	ENSG00000099364.12	16	30935418	30960104	FBXL19-002
Breast-MammaryTissue	19_46908398_A_G_b37	ENST00000398409.1	1.4756520711337098	5.267167172366539	3.98733370161136e-07	0.0013867385289228983	TMEM160	0.0567067852824392	ENSG00000130748.6	19	47549165	47551888	-	5860	1.05874	766.4739999999999	126.681	-643490	19	46908398	A	G	rs59153288	1	15	16	0.0437158	1	0.00105753	-0.772457	0.231156	0.807258	0.811844	0.532319	2.4166e-05	CST3	ENSG00000101439.4	20	23614294	23619110	CST3-003
Breast-MammaryTissue	19_46908398_A_G_b37	ENST00000350803.4	1.46171371549249	5.118051526198889	7.989817962249501e-07	0.0013867385289228983	TMEM160	0.019706820084876	ENSG00000130748.6	19	47549165	47551888	-	5860	1.05874	766.4739999999999	126.681	-643490	19	46908398	A	G	rs59153288	1	15	16	0.0437158	1	0.00105753	-0.772457	0.231156	0.807258	0.811844	0.532319	2.4166e-05	PPM1G	ENSG00000115241.9	2	27604068	27632449	PPM1G-201
Breast-MammaryTissue	19_46908398_A_G_b37	ENST00000376925.3	-1.4776445660903899	-5.276573043366461	3.8145880449514203e-07	0.0013867385289228983	TMEM160	-0.0292865615192058	ENSG00000130748.6	19	47549165	47551888	-	5860	1.05874	766.4739999999999	126.681	-643490	19	46908398	A	G	rs59153288	1	15	16	0.0437158	1	0.00105753	-0.772457	0.231156	0.807258	0.811844	0.532319	2.4166e-05	CST3	ENSG00000101439.4	20	23614285	23618663	CST3-001
Breast-MammaryTissue	19_46908398_A_G_b37	ENST00000344034.4	-1.47917156165569	-5.195151363550719	5.587172628406311e-07	0.0013867385289228983	TMEM160	-0.0347671464237058	ENSG00000130748.6	19	47549165	47551888	-	5860	1.05874	766.4739999999999	126.681	-643490	19	46908398	A	G	rs59153288	1	15	16	0.0437158	1	0.00105753	-0.772457	0.231156	0.807258	0.811844	0.532319	2.4166e-05	PPM1G	ENSG00000115241.9	2	27604061	27632554	PPM1G-001
Breast-MammaryTissue	19_46908398_A_G_b37	ENST00000275521.6	-1.47947460273844	-5.10658196012498	8.423876375427641e-07	0.0013867385289228983	TMEM160	-0.106976528489062	ENSG00000130748.6	19	47549165	47551888	-	5860	1.05874	766.4739999999999	126.681	-643490	19	46908398	A	G	rs59153288	1	15	16	0.0437158	1	0.00105753	-0.772457	0.231156	0.807258	0.811844	0.532319	2.4166e-05	IGFBP3	ENSG00000146674.10	7	45952197	45960873	IGFBP3-001
Breast-MammaryTissue	7_100873558_T_G_b37	ENST00000401528.1	0.8956352055811271	4.82843999180192	2.9634885551273e-06	0.0040654123828754675	FIS1	0.0371997505279746	ENSG00000214253.4	7	100882739	100895597	-	5923	1.04693	504.155	122.959	-22039	7	100873558	T	G	rs142501950	1	27	28	0.07650269999999999	1	1.8791199999999995e-21	-0.8833200000000001	0.0787375	9.999e-05	2.60858e-16	1.11787e-14	3.49254e-05	CLDN15	ENSG00000106404.9	7	100875373	100882101	CLDN15-001
Breast-MammaryTissue	2_27315021_G_A_b37	ENST00000396330.2	-0.46865655584167204	-4.48098199148535	1.3303161644424001e-05	0.015642617642179137	KHK	-0.00518925847739775	ENSG00000138030.8	2	27309615	27323465	+	3635	1.04708	297.96	123.84299999999999	5406	2	27315021	G	A	rs6754356	1	116	145	0.396175	-1	1.8155e-20	-0.648367	0.0597875	9.999e-05	8.403050000000001e-16	3.26062e-14	5.91303e-05	SNX16	ENSG00000104497.9	8	82711822	82754521	SNX16-201
Breast-MammaryTissue	6_32634039_C_CT_b37	ENST00000448276.2	-0.462208408099739	-4.185540826444161	4.4753988110397205e-05	0.03348818873969813	HLA-DQB1	-0.0422892761807651	ENSG00000179344.12	6	32627244	32636160	-	24336	1.0732899999999999	428.74199999999996	109.62799999999999	-2121	6	32634039	C	CT	rs138047662	1	84	96	0.262295	-1	1.59087e-40	-1.25482	0.0671933	9.999e-05	3.215209999999999e-30	7.268589999999999e-28	4.591649999999999e-05	SMARCD2	ENSG00000108604.11	17	61909444	61920300	SMARCD2-001
Breast-MammaryTissue	6_31082960_A_G_b37	ENST00000376255.4	-0.45015172678194204	-4.19213028242159	4.3587838028439796e-05	0.03348818873969813	PSORS1C1	0.0141448970986829	ENSG00000204540.6	6	31082527	31107869	+	16293	1.07649	364.459	111.995	433	6	31082960	A	G	rs1042149	1	133	168	0.459016	-1	3.65975e-19	0.7050810000000001	0.0681414	9.999e-05	2.1323000000000002e-13	6.13676e-12	5.47323e-05	TCF19	ENSG00000137310.7	6	31126324	31131992	TCF19-002
Breast-MammaryTissue	5_5317110_A_G_b37	ENST00000328666.6	0.6313909233376129	4.19804110679434	4.25665662546764e-05	0.03348818873969813	ADAMTS16	0.0284203442579012	ENSG00000145536.11	5	5140443	5320417	+	7207	1.01769	948.337	130.944	176667	5	5317110	A	G	rs2964154	1	45	49	0.13388	-1	0.000215233	-0.367473	0.0968139	0.34175500000000003	0.34438	0.36885	1.63047e-05	SIRT7	ENSG00000187531.9	17	79869815	79876070	SIRT7-001
Breast-MammaryTissue	19_46908398_A_G_b37	ENST00000297533.4	-1.1982360825299998	-4.22340356555057	3.8438550828796705e-05	0.03348818873969813	TMEM160	-0.00931590562905998	ENSG00000130748.6	19	47549165	47551888	-	5860	1.05874	766.4739999999999	126.681	-643490	19	46908398	A	G	rs59153288	1	15	16	0.0437158	1	0.00105753	-0.772457	0.231156	0.807258	0.811844	0.532319	2.4166e-05	TMUB1	ENSG00000164897.8	7	150778167	150780633	TMUB1-001
Breast-MammaryTissue	10_4641211_C_A_b37	ENST00000535772.1	-0.414986475612264	-4.14647087469877	5.2305472353316795e-05	0.035877195245012546	CALML3	-0.00271304623758404	ENSG00000178363.3	10	5566924	5568225	+	8729	1.05342	1049.75	127.42200000000001	-925713	10	4641211	C	A	rs1443852	1	117	151	0.41256800000000005	-1	3.01932e-05	-0.278496	0.0646578	0.08429160000000001	0.0840803	0.17714000000000002	1.72494e-05	MAPT	ENSG00000186868.11	17	43971748	44105700	MAPT-206
Breast-MammaryTissue	3_50378802_C_T_b37	ENST00000406870.2	-1.38003320550185	-4.02905034307347	8.303287447619019e-05	0.04881739927239439	CISH	0.0234830544745575	ENSG00000114737.11	3	50643927	50649262	-	3203	0.994627	133.58700000000002	123.943	-270460	3	50378802	C	T	rs78166579	1	11	11	0.0300546	1	0.00412903	0.6831	0.234411	0.679104	0.671363	0.49056700000000003	0.000103954	BCL6	ENSG00000113916.13	3	187439165	187463515	BCL6-001
Breast-MammaryTissue	10_119063145_C_T_b37	ENST00000282957.4	-0.518785304941169	-4.03968279909145	7.966194841325609e-05	0.04881739927239439	PNLIP	-0.0959326778245725	ENSG00000175535.6	10	118305443	118327367	+	5460	1.0258	522.515	126.96600000000001	757702	10	119063145	C	T	rs10886055	1	62	71	0.19398900000000002	1	0.000427371	-0.5058600000000001	0.140316	0.401042	0.40169699999999997	0.39450799999999997	3.0698600000000005e-05	CPB1	ENSG00000153002.7	3	148545588	148577970	CPB1-201
Cells-Transformedfibroblasts	19_41909346_A_G_b37	ENST00000221943.9	-1.1109288709650702	-17.8817302322685	1.6676519054697197e-47	4.096586905786366e-43	B3GNT8	-0.0261949105915841	ENSG00000177191.2	19	41931264	41934635	-	5706	1.0269700000000002	675.58	201.688	-25289	19	41909346	A	G	rs6508977	1	168	202	0.371324	-1	1.3075799999999998e-10	-0.218756	0.0324867	9.999e-05	8.221200000000001e-07	2.00408e-06	9.11228e-05	ATP5SL	ENSG00000105341.14	19	41937224	41945810	ATP5SL-007
Cells-Transformedfibroblasts	1_111733724_G_C_b37	ENST00000484310.1	1.1148800869338702	15.933557534565999	1.3720982836246e-40	1.685279716861915e-36	CHI3L2	-0.0232280373694074	ENSG00000064886.9	1	111743393	111786062	+	7161	1.04805	837.66	201.34	-9669	1	111733724	G	C	rs10857859	1	130	150	0.275735	1	1.22111e-14	0.355209	0.0430523	9.999e-05	1.5594799999999997e-10	6.16919e-10	7.86175e-05	DRAM2	ENSG00000156171.10	1	111659955	111682825	DRAM2-003
Cells-Transformedfibroblasts	12_6594787_A_G_b37	ENST00000400911.3	0.896504631536002	11.585529501654598	2.1185697480158897e-25	1.7347555286670112e-21	MRPL51	0.0339749965451515	ENSG00000111639.3	12	6601150	6602521	-	6579	1.0452	868.7589999999999	201.048	-7734	12	6594787	A	G	rs12310984	1	152	183	0.336397	1	1.9778800000000002e-45	-0.544689	0.0304503	9.999e-05	1.25217e-38	4.2066e-37	7.5126e-05	VAMP1	ENSG00000139190.12	12	6571403	6579819	VAMP1-003
Cells-Transformedfibroblasts	16_420678_C_T_b37	ENST00000250930.3	-0.8056531454603051	-11.1962157703351	4.268005103265339e-24	2.6210886340428263e-20	MRPL28	-0.0261640072488888	ENSG00000086504.11	16	417384	420527	-	6180	1.0599399999999999	877.3839999999999	197.63400000000001	151	16	420678	C	T	rs3743884	1	167	212	0.389706	-1	3.5934300000000003e-22	-0.306645	0.0284681	9.999e-05	2.8519099999999995e-17	2.1235499999999998e-16	7.78876e-05	TMEM8A	ENSG00000129925.6	16	421864	431978	TMEM8A-002
Cells-Transformedfibroblasts	18_77755819_A_C_b37	ENST00000451882.2	-0.674313965822858	-7.092192967419519	1.19229694194072e-11	5.857754875754757e-08	TXNL4A	-0.101493331835387	ENSG00000141759.10	18	77732867	77793949	-	5216	1.04807	517.592	196.095	-38130	18	77755819	A	C	rs8083389	1	113	130	0.23897100000000002	-1	2.50444e-44	-0.565577	0.032226599999999994	9.999e-05	5.385399999999999e-37	1.6250999999999998e-35	0.000127236	HSBP1L1	ENSG00000226742.3	18	77724561	77730822	HSBP1L1-001
Cells-Transformedfibroblasts	7_150017214_A_G_b37	ENST00000463441.1	-0.6289660270159829	-6.526573421742509	3.38709523024044e-10	1.3867332388476069e-06	RARRES2	0.0368309912252471	ENSG00000106538.5	7	150035408	150038763	-	7706	1.0444200000000001	901.4830000000001	198.39700000000002	-21549	7	150017214	A	G	rs2159236	1	114	128	0.235294	1	2.39633e-22	0.430953	0.0398014	9.999e-05	3.03585e-17	2.25855e-16	7.22209e-05	LRRC61	ENSG00000127399.10	7	150020305	150025875	LRRC61-004
Cells-Transformedfibroblasts	11_680647_A_C_b37	ENST00000397604.3	-0.498971243099948	-6.26414089148068	1.50047373451547e-09	5.265591041196075e-06	TMEM80	-0.0579997421268119	ENSG00000177042.10	11	695533	705028	+	7013	1.0594	884.393	199.09400000000002	-14886	11	680647	A	C	rs11246262	1	189	249	0.457721	1	7.30317e-46	-0.605903	0.0336226	9.999e-05	3.84847e-39	1.34543e-37	7.71418e-05	RNH1	ENSG00000023191.12	11	494515	507253	RNH1-003
Cells-Transformedfibroblasts	19_50016748_C_T_b37	ENST00000270645.3	0.720661147650448	6.02947953227803	5.4761190910956104e-09	1.4946762830307074e-05	FCGRT	0.00887811283716342	ENSG00000104870.8	19	50015536	50029590	+	7663	1.07566	984.107	199.891	1212	19	50016748	C	T	rs59774409	1	69	76	0.139706	1	1.2446e-11	-0.272503	0.038187900000000004	9.999e-05	8.180350000000001e-08	2.2960999999999998e-07	7.28442e-05	RCN3	ENSG00000142552.3	19	50030875	50046895	RCN3-001
Cells-Transformedfibroblasts	6_31085770_G_A_b37	ENST00000376255.4	-0.550652084549796	-6.04982359011299	4.90151172458778e-09	1.4946762830307074e-05	PSORS1C1	0.119709667412246	ENSG00000204540.6	6	31082527	31107869	+	17177	1.0844799999999999	364.024	172.859	3243	6	31085770	G	A	rs551894425	1	195	237	0.435662	-1	1.4931899999999998e-34	0.8726799999999999	0.0598375	9.999e-05	9.01753e-26	1.2968600000000002e-24	0.000202152	TCF19	ENSG00000137310.7	6	31126324	31131992	TCF19-002
Cells-Transformedfibroblasts	22_24266954_A_C_b37	ENST00000248935.5	0.449644422698019	5.800169255902901	1.8752996956605402e-08	4.606673702390117e-05	AP000350.4	-0.06422896604048599	ENSG00000218537.1	22	24236770	24241117	-	7829	1.05641	1030.31	203.541	25837	22	24266954	A	C	rs5751776	1	177	227	0.417279	-1	1.1166499999999998e-77	1.16476	0.0407336	9.999e-05	1.2877499999999997e-69	4.61454e-67	6.56079e-05	GSTT1	ENSG00000184674.8	22	24376133	24384284	GSTT1-001
Cells-Transformedfibroblasts	4_47945814_C_G_b37	ENST00000502448.1	-0.534397901617236	-5.0436415311425495	8.46484939436291e-07	0.0018903547761138625	CORIN	-0.224804189138328	ENSG00000145244.7	4	47596015	47840123	-	5769	1.0756700000000001	421.588	191.019	105691	4	47945814	C	G	rs9995022	1	83	95	0.17463199999999998	-1	2.4229400000000002e-05	-0.204699	0.0474959	0.0343966	0.0379377	0.037110000000000004	0.000170027	NFXL1	ENSG00000170448.7	4	47849257	47880721	NFXL1-008
Cells-Transformedfibroblasts	10_15243008_A_C_b37	ENST00000011700.6	0.42638329275135206	4.856749962477259	2.0389230355255e-06	0.004173845363973659	FAM171A1	0.0067356395282306	ENSG00000148468.12	10	15253642	15413061	-	8173	1.0339399999999999	847.9010000000001	198.105	-170053	10	15243008	A	C	rs3935155	1	180	225	0.413603	1	2.48097e-07	-0.232857	0.0437857	0.00059994	0.00113043	0.00169475	7.426069999999999e-05	VPS13D	ENSG00000048707.9	1	12337178	12570415	VPS13D-014
Cells-Transformedfibroblasts	1_150709785_C_G_b37	ENST00000358595.5	0.37267160937938704	4.588580188320639	6.88302453858703e-06	0.01300626906079926	HORMAD1	-0.0227773288549803	ENSG00000143452.11	1	150670536	150693364	-	4446	1.07206	353.92800000000005	192.479	16421	1	150709785	C	G	rs11204718	1	152	200	0.367647	1	7.714649999999999e-44	0.925222	0.053171699999999995	9.999e-05	7.54563e-37	2.2532599999999998e-35	0.000200334	ARNT	ENSG00000143437.16	1	150782181	150849244	ARNT-001
Cells-Transformedfibroblasts	16_4137828_CTCT_C_b37	ENST00000495397.1	-1.34358042685384	-4.475402960166889	1.13181908032706e-05	0.018535423805489483	DNAJA3	-0.0525120929841074	ENSG00000103423.9	16	4475806	4506776	+	8145	1.0476	1104.42	203.541	-337978	16	4137828	CTCT	C	rs200345946	1	11	12	0.0220588	1	0.000501439	-0.344148	0.09748630000000001	0.672263	0.672402	0.294274	5.9545e-05	FCRLB	ENSG00000162746.10	1	161695691	161697932	FCRLB-002
Cells-Transformedfibroblasts	17_21023006_G_A_b37	ENST00000377526.3	0.40196695453952297	4.4882318968635	1.0702964921631e-05	0.018535423805489483	DHRS7B	-0.0152697549672608	ENSG00000109016.13	17	21026677	21096578	+	4193	1.05134	484.101	197.02700000000002	-3671	17	21023006	G	A	rs1478791	1	202	257	0.472426	-1	5.75262e-05	0.154631	0.037723	0.0761924	0.07882739999999999	0.0665094	0.00013743799999999998	AUP1	ENSG00000115307.12	2	74753775	74757066	AUP1-001
Cells-Transformedfibroblasts	12_6990548_A_G_b37	ENST00000465503.1	-0.39249800785352	-4.366958396186	1.8062990341173e-05	0.027732334858182172	SPSB2	0.0210819929001391	ENSG00000111671.5	12	6980113	6998522	-	7086	1.03767	960.057	202.856	-7974	12	6990548	A	G	rs10849531	1	140	186	0.341912	1	1.2521299999999999e-38	0.535099	0.033830400000000004	9.999e-05	1.93827e-32	4.40992e-31	6.637510000000001e-05	STIM2	ENSG00000109689.10	4	26862463	27025588	STIM2-002
Cells-Transformedfibroblasts	4_178363378_G_A_b37	ENST00000290607.7	-0.36629557591648293	-4.28121056810917	2.5974707154168e-05	0.037533451837772756	AGA	0.0111866895197646	ENSG00000038002.4	4	178351924	178363657	-	7965	1.03546	775.023	199.655	-279	4	178363378	G	A	rs11131799	1	168	215	0.395221	-1	6.959249999999999e-50	0.7273930000000001	0.0377584	9.999e-05	4.686769999999999e-42	2.05649e-40	8.1641e-05	STARD9	ENSG00000159433.7	15	42867857	43013179	STARD9-001
Cells-Transformedfibroblasts	1_115861265_T_C_b37	ENST00000433710.1	0.38794411365647397	4.2509479271713	2.9487817732612202e-05	0.040242680144534373	NGF	0.0129397074071618	ENSG00000134259.3	1	115828539	115880857	-	6971	1.08101	512.841	191.165	-19592	1	115861265	T	C	rs7523654	1	171	218	0.400735	-1	5.29424e-17	-0.491468	0.054166	9.999e-05	1.4141e-12	6.94945e-12	0.000142029	MIPEP	ENSG00000027001.7	13	24304328	24334712	MIPEP-004
Esophagus-Mucosa	11_780321_C_CTG_b37	ENST00000321153.4	-0.693896485577667	-8.476650221379861	2.5789314613127604e-15	4.2281581308222705e-11	AP006621.5	-0.122247748850805	ENSG00000255284.1	11	777578	784297	+	7070	1.04908	910.547	177.922	2743	11	780321	C	CTG	rs10678686	1	170	217	0.45020699999999997	-1	4.39984e-35	-0.569331	0.0377025	9.999e-05	3.47534e-29	1.40552e-27	4.65224e-05	RPLP2	ENSG00000177600.4	11	809647	812875	RPLP2-001
Esophagus-Mucosa	5_147583402_A_T_b37	ENST00000256084.7	0.5685221959685091	6.83630321538074	6.94130655159477e-11	5.690136045669813e-07	SPINK6	0.0342901027807839	ENSG00000178172.2	5	147582357	147594700	+	6180	1.0610600000000001	566.661	177.604	1045	5	147583402	A	T	rs6865474	1	167	225	0.466805	1	9.366610000000002e-24	-0.64632	0.0564638	9.999e-05	3.33953e-19	5.6005200000000006e-18	7.79466e-05	SPINK5	ENSG00000133710.11	5	147443566	147516852	SPINK5-001
Esophagus-Mucosa	22_24266954_A_C_b37	ENST00000248935.5	0.490845216630615	5.70740116699803	3.4404448368870804e-08	0.00018802031033587894	AP000350.4	-0.00815646436295456	ENSG00000218537.1	22	24236770	24241117	-	7098	1.04357	830.4580000000001	178.22099999999998	25837	22	24266954	A	C	rs5751776	1	158	201	0.417012	-1	1.14966e-70	1.16616	0.0423354	9.999e-05	1.4006999999999999e-61	8.7175e-59	5.00223e-05	GSTT1	ENSG00000184674.8	22	24376133	24384284	GSTT1-001
Esophagus-Mucosa	2_131131424_G_C_b37	ENST00000377687.4	0.511749121460955	4.499476116734519	1.07163199470541e-05	0.03558082584432417	PTPN18	0.0101780053431084	ENSG00000072135.8	2	131113580	131132982	+	4496	1.01495	496.19300000000004	178.042	17844	2	131131424	G	C	rs3739123	1	77	86	0.178423	1	1.8467899999999997e-34	-0.635733	0.042665499999999995	9.999e-05	5.466469999999999e-28	2.0277700000000003e-26	7.541560000000001e-05	KLF5	ENSG00000102554.9	13	73632930	73651676	KLF5-001
Esophagus-Mucosa	1_63856651_A_G_b37	ENST00000494765.1	0.464294956190639	4.496588042087611	1.08511210260214e-05	0.03558082584432417	ITGB3BP	0.00987313986124364	ENSG00000142856.12	1	63906441	63994857	-	5943	1.04378	555.432	175.87	-138206	1	63856651	A	G	rs7545044	1	132	150	0.311203	-1	1.25753e-26	-0.6354310000000001	0.05131990000000001	9.999e-05	2.68246e-21	5.48368e-20	7.48452e-05	ALG6	ENSG00000088035.11	1	63893909	63902804	ALG6-004
Esophagus-Mucosa	6_133118766_AAC_A_b37	ENST00000395139.3	-0.8567722235048739	-4.43980102562495	1.38573892307422e-05	0.03786531607300306	SLC18B1	-0.000272709756666796	ENSG00000146409.6	6	133090509	133119701	-	6357	1.0543	539.008	173.71900000000002	-935	6	133118766	AAC	A	rs200332884	1	26	27	0.05601659999999999	1	7.03886e-07	-0.45544399999999996	0.08894919999999999	0.00079992	0.00179786	0.00391158	8.00416e-05	HYAL2	ENSG00000068001.9	3	50355240	50359144	HYAL2-002
Esophagus-Mucosa	16_53478022_G_A_b37	ENST00000306243.5	0.38707559909007794	4.3604283491797595	1.94267014043877e-05	0.04550010993213376	RBL2	0.0134373022128897	ENSG00000103479.10	16	53467889	53524951	+	6315	1.02947	672.934	178.77900000000002	10133	16	53478022	G	A	rs9927720	1	170	224	0.46473000000000003	-1	1.33221e-33	-0.46179	0.0315758	9.999e-05	1.3606e-27	4.9327700000000007e-26	5.86728e-05	CHST14	ENSG00000169105.6	15	40763160	40765353	CHST14-001
Esophagus-Mucosa	7_150025915_G_T_b37	ENST00000359623.4	0.4322716204815739	4.31846182958318	2.31820983770481e-05	0.047508812861462954	ZBED6CL	0.113980568309097	ENSG00000188707.4	7	150026938	150029808	+	7060	1.05354	796.2339999999999	177.02599999999998	-1023	7	150025915	G	T	rs11764936	1	101	118	0.244813	1	2.08798e-27	-0.803344	0.0635868	9.999e-05	3.4353399999999997e-22	7.63587e-21	5.4041499999999994e-05	LRRC61	ENSG00000127399.10	7	150020376	150035239	LRRC61-001
Esophagus-Muscularis	17_7457352_G_A_b37	ENST00000380466.2	-0.698012184721566	-9.347194640072939	1.3013860132524599e-17	3.253855448935125e-13	TNFSF12	-0.00436302823791768	ENSG00000239697.6	17	7452208	7461207	+	5913	1.0160200000000001	840.6010000000001	161.57399999999998	5144	17	7457352	G	A	rs4968210	1	146	192	0.440367	1	2.7661000000000004e-10	-0.23674	0.035412900000000004	9.999e-05	1.6862299999999998e-06	6.751439999999999e-06	4.37725e-05	SAT2	ENSG00000141504.7	17	7529555	7531187	SAT2-001
Esophagus-Muscularis	11_780319_G_GTC_b37	ENST00000321153.4	-0.716712547807445	-8.5636689419993	2.2456010938521398e-15	2.8073382074792524e-11	AP006621.5	-0.057314886227135015	ENSG00000255284.1	11	777578	784297	+	6966	1.0322	921.11	158.87	2741	11	780319	G	GTC	rs200817511	1	152	195	0.447248	-1	3.5275399999999996e-37	-0.643135	0.039599	9.999e-05	8.239719999999999e-31	4.3884199999999997e-29	4.24116e-05	RPLP2	ENSG00000177600.4	11	809647	812875	RPLP2-001
Esophagus-Muscularis	11_780319_G_GTC_b37	ENST00000530398.1	0.715604518027519	8.30283793642842	1.1921721184441799e-14	9.935959825819942e-11	AP006621.5	0.0105550788804921	ENSG00000255284.1	11	777578	784297	+	6966	1.0322	921.11	158.87	2741	11	780319	G	GTC	rs200817511	1	152	195	0.447248	-1	3.5275399999999996e-37	-0.643135	0.039599	9.999e-05	8.239719999999999e-31	4.3884199999999997e-29	4.24116e-05	RPLP2	ENSG00000177600.4	11	810269	812871	RPLP2-009
Esophagus-Muscularis	16_713694_TCA_T_b37	ENST00000026218.5	0.6320234283131579	6.26967127353304	1.99698284827523e-09	1.1021485506053927e-05	RHBDL1	-0.00978774434845684	ENSG00000103269.9	16	725666	728268	+	6703	1.06635	807.547	153.284	-11972	16	713694	TCA	T	rs75950788	1	144	183	0.419725	1	2.73591e-09	0.290064	0.0463458	9.999e-05	1.77835e-05	6.0525699999999995e-05	5.4601899999999996e-05	PIGQ	ENSG00000007541.10	16	620018	634109	PIGQ-002
Esophagus-Muscularis	17_44019712_G_A_b37	ENST00000576870.1	0.5776729163418179	6.25144065784421	2.20403261729671e-09	1.1021485506053927e-05	MAPT	-0.00651436549348473	ENSG00000186868.11	17	43971748	44105700	+	6337	1.0467799999999998	306.753	149.908	47964	17	44019712	G	A	rs242557	1	126	150	0.344037	1	2.1805399999999997e-15	0.506411	0.058302599999999996	9.999e-05	5.63589e-11	4.2639300000000004e-10	0.000134211	KANSL1	ENSG00000120071.8	17	44107284	44117431	KANSL1-005
Esophagus-Muscularis	2_48822381_G_A_b37	ENST00000484110.1	0.544364701457711	6.12016677449224	4.46003109300595e-09	1.8585692903071294e-05	GTF2A1L	-0.118655158865641	ENSG00000242441.3	2	48844937	48960287	+	6639	1.04867	447.874	152.259	-22556	2	48822381	G	A	rs2140551	1	148	193	0.44266099999999997	-1	3.620839999999999e-63	1.05017	0.0402941	9.999e-05	3.400209999999999e-53	1.5241999999999999e-50	9.254559999999999e-05	STON1	ENSG00000243244.1	2	48756522	48759056	STON1-004
Esophagus-Muscularis	7_150034184_T_C_b37	ENST00000359623.4	0.647340574932659	5.6661903202456605	4.72707125403393e-08	0.00016840792359049524	ZBED6CL	0.0565733433964697	ENSG00000188707.4	7	150026938	150029808	+	6918	1.04411	830.7860000000001	159.80700000000002	7246	7	150034184	T	C	rs3735170	1	91	99	0.227064	1	4.11358e-27	-0.898645	0.0702388	9.999e-05	4.10383e-22	9.23653e-21	4.90895e-05	LRRC61	ENSG00000127399.10	7	150020376	150035239	LRRC61-001
Esophagus-Muscularis	7_150034184_T_C_b37	ENST00000463441.1	-0.640963655652338	-5.64029563416537	5.388406946062321e-08	0.00016840792359049524	ZBED6CL	-0.160136377476371	ENSG00000188707.4	7	150026938	150029808	+	6918	1.04411	830.7860000000001	159.80700000000002	7246	7	150034184	T	C	rs3735170	1	91	99	0.227064	1	4.11358e-27	-0.898645	0.0702388	9.999e-05	4.10383e-22	9.23653e-21	4.90895e-05	LRRC61	ENSG00000127399.10	7	150020305	150025875	LRRC61-004
Esophagus-Muscularis	16_784765_C_T_b37	ENST00000321878.5	-0.641336781876398	-5.234267286981	3.97537629411235e-07	0.0011044037053521232	HAGHL	0.0109987773968837	ENSG00000103253.13	16	776936	785525	+	6790	1.0522799999999999	983.3	158.799	7829	16	784765	C	T	rs9928077	1	70	78	0.178899	1	1.46827e-10	0.500019	0.0735294	9.999e-05	9.43367e-07	3.9645e-06	4.26968e-05	PIGQ	ENSG00000007541.10	16	619947	634136	PIGQ-001
Esophagus-Muscularis	4_9385880_A_T_b37	ENST00000311151.5	-1.1095497709367	-5.10489534328695	7.349850375299729e-07	0.0018376830893361913	WDR1	0.0100133441956971	ENSG00000071127.12	4	10075963	10118573	-	9322	1.0521399999999999	562.014	149.113	-732693	4	9385880	A	T	rs79671693	1	25	26	0.059633000000000005	1	0.00012002700000000001	0.29843200000000003	0.0759057	0.218511	0.216484	0.185757	7.46628e-05	DPYSL2	ENSG00000092964.12	8	26435359	26515694	DPYSL2-001
Esophagus-Muscularis	22_29690345_T_C_b37	ENST00000579925.1	0.440232351008854	4.67302982420278	5.2724189574284205e-06	0.0119842082902348	RHBDD3	0.0222905643359759	ENSG00000100263.9	22	29655841	29663967	-	4711	1.0252299999999999	320.065	152.418	26378	22	29690345	T	C	rs131189	1	129	169	0.387615	-1	6.4284900000000005e-06	-0.184607	0.0397142	0.00829917	0.00979622	0.0178358	0.000118965	MTMR4	ENSG00000108389.5	17	56566898	56595212	MTMR4-003
Esophagus-Muscularis	14_94582130_T_TGGCCATGGC_b37	ENST00000498411.1	0.40835211705462104	4.45931070625308	1.33285548676036e-05	0.027771154779557734	IFI27	0.0673065440912179	ENSG00000165949.8	14	94571182	94583033	+	7251	1.0341200000000002	917.378	159.983	10948	14	94582130	T	TGGCCATGGC	rs3833507	1	136	173	0.396789	-1	1.2794700000000002e-08	-0.40832399999999996	0.06849169999999999	0.00019998	5.8509300000000006e-05	0.000180777	4.2883e-05	FLNA	ENSG00000196924.10	X	153576898	153581251	FLNA-017
Esophagus-Muscularis	9_134392930_C_T_b37	ENST00000438754.2	-0.49569080885099703	-4.38223437678769	1.8474851691734804e-05	0.03553282437295733	POMT1	0.0204909904401307	ENSG00000130714.11	9	134378289	134399187	+	5778	1.0392	720.8910000000001	157.12	14641	9	134392930	C	T	rs11243407	1	74	88	0.201835	-1	8.11753e-20	0.333364	0.0324268	9.999e-05	4.2956499999999995e-15	5.00154e-14	5.55839e-05	SEPT5	ENSG00000184702.13	22	19705981	19710842	SEPT5-002
Esophagus-Muscularis	11_119060963_T_C_b37	ENST00000372506.1	0.49547136746950204	4.29096719102074	2.70446265973762e-05	0.04829977134387122	CBL	0.00892224908687315	ENSG00000110395.4	11	119076752	119178859	+	5348	1.05271	573.4680000000001	157.332	-15789	11	119060963	T	C	rs45535039	1	104	114	0.261468	1	7.48735e-22	-0.545346	0.049619800000000006	9.999e-05	2.83143e-17	4.1220099999999994e-16	7.33189e-05	ZNF691	ENSG00000164011.13	1	43312299	43318148	ZNF691-004
Heart-LeftVentricle	19_41900876_G_T_b37	ENST00000221943.9	-1.16710063665405	-15.737522093431	6.563981784642909e-36	6.559386997393659e-32	EXOSC5	-0.0332901123071689	ENSG00000077348.4	19	41892279	41903364	-	4741	1.04088	482.38599999999997	131.843	-2488	19	41900876	G	T	rs11668924	1	103	124	0.326316	-1	1.57411e-07	-0.380312	0.0691729	0.00039996	0.00039613800000000003	0.00170377	5.23179e-05	ATP5SL	ENSG00000105341.14	19	41937224	41945810	ATP5SL-007
Heart-LeftVentricle	8_133715804_G_A_b37	ENST00000522780.1	-0.5568861906338071	-6.14758453598333	4.77060616918384e-09	2.2344960559133243e-05	LRRC6	-0.0146939166195792	ENSG00000129295.4	8	133584320	133687838	-	6535	1.03102	681.302	133.412	27966	8	133715804	G	A	rs10092339	1	131	186	0.48947399999999996	1	4.4996599999999995e-18	-0.670602	0.06797589999999999	9.999e-05	1.65778e-13	3.25261e-12	3.55917e-05	TMEM71	ENSG00000165071.10	8	133697253	133740232	TMEM71-010
Heart-LeftVentricle	8_145629497_A_G_b37	ENST00000524492.1	-0.5995358384960789	-6.0821652244887	6.7081838964675e-09	2.2344960559133243e-05	CPSF1	-0.0730123910807301	ENSG00000071894.10	8	145618458	145634753	-	3275	1.0319	393.001	131.664	-5256	8	145629497	A	G	rs10096524	1	133	174	0.457895	1	1.92509e-43	-0.8036800000000001	0.0411144	9.999e-05	4.09287e-36	1.23564e-33	6.192180000000001e-05	FBXL6	ENSG00000182325.6	8	145579091	145581633	FBXL6-004
Heart-LeftVentricle	16_783865_T_C_b37	ENST00000569529.1	0.606199165311208	4.86535241292032	2.44611593557341e-06	0.004888807308837018	HAGHL	-0.0240795873743373	ENSG00000103253.13	16	776936	785525	+	6509	1.0347600000000001	860.145	133.128	6929	16	783865	T	C	rs12051245	1	70	78	0.205263	1	8.809760000000001e-16	0.563028	0.0626313	9.999e-05	2.37521e-11	3.535069999999999e-10	2.86248e-05	FAM173A	ENSG00000103254.5	16	770975	772601	FAM173A-001
Heart-LeftVentricle	1_169562904_C_T_b37	ENST00000220763.5	-0.5797948772320589	-4.89214175174673	2.1690623263532297e-06	0.004888807308837018	F5	0.0348327808330841	ENSG00000198734.6	1	169483404	169555826	-	7017	1.05043	431.905	130.005	7078	1	169562904	C	T	rs6128	1	71	85	0.22368400000000002	1	0.000354015	0.311269	0.0851822	0.32852	0.325878	0.299084	6.0700200000000005e-05	CPQ	ENSG00000104324.11	8	97657455	98155729	CPQ-001
Heart-LeftVentricle	17_44019712_G_A_b37	ENST00000576870.1	0.46806003254368106	4.68295508255561	5.4767913184774495e-06	0.009121595940924192	MAPT	-0.00872572801268132	ENSG00000186868.11	17	43971748	44105700	+	6260	1.03047	289.64099999999996	128.526	47964	17	44019712	G	A	rs242557	1	115	138	0.363158	1	1.2888399999999998e-45	0.928409	0.0453991	9.999e-05	3.3590799999999997e-37	1.2785799999999998e-34	8.35271e-05	KANSL1	ENSG00000120071.8	17	44107284	44117431	KANSL1-005
Heart-LeftVentricle	16_783865_T_C_b37	ENST00000219542.3	0.592449518830587	4.6122660123821	7.440936065510609e-06	0.010622467728949645	HAGHL	-0.0339715087852247	ENSG00000103253.13	16	776936	785525	+	6509	1.0347600000000001	860.145	133.128	6929	16	783865	T	C	rs12051245	1	70	78	0.205263	1	8.809760000000001e-16	0.563028	0.0626313	9.999e-05	2.37521e-11	3.535069999999999e-10	2.86248e-05	METRN	ENSG00000103260.4	16	765338	767390	METRN-004
Heart-LeftVentricle	17_48637385_G_A_b37	ENST00000319778.6	-0.41916632018432604	-4.235129855036741	3.60462542141847e-05	0.038160652986100004	SPATA20	-0.0054571612523725	ENSG00000006282.15	17	48623667	48633213	+	4785	1.0782	590.068	131.111	13718	17	48637385	G	A	rs9906084	1	111	142	0.373684	1	9.177449999999999e-39	-0.7387279999999999	0.0418221	9.999e-05	4.93567e-33	1.02473e-30	4.94625e-05	EPC1	ENSG00000120616.11	10	32556679	32636146	EPC1-002
Heart-LeftVentricle	4_4291832_A_T_b37	ENST00000354440.2	-0.4540487939112	-4.25928508737674	3.26776491839977e-05	0.038160652986100004	LYAR	-0.00895563145945567	ENSG00000145220.9	4	4269428	4291896	-	9025	1.01274	1209.66	136.14600000000002	-64	4	4291832	A	T	rs1048898	1	92	111	0.292105	1	7.699379999999999e-34	-0.932681	0.059206100000000005	9.999e-05	1.5218099999999998e-27	1.62407e-25	1.85793e-05	CELF2	ENSG00000048740.13	10	11206993	11376357	CELF2-002
Heart-LeftVentricle	6_90091121_G_C_b37	ENST00000522073.1	0.42014945425873496	4.220876149857911	3.81873841550085e-05	0.038160652986100004	RRAGD	-0.0769237200306149	ENSG00000025039.10	6	90074355	90121989	-	5027	1.04101	455.816	129.826	-30868	6	90091121	G	C	rs9451212	1	136	175	0.46052600000000005	1	8.833689999999999e-06	0.136094	0.0295911	0.014498599999999999	0.0161067	0.0405204	5.5396300000000004e-05	TTC1	ENSG00000113312.6	5	159463513	159492518	TTC1-003
Lung	16_675215_G_A_b37	ENST00000026218.5	1.0038321895132098	13.221865295930199	3.708808996121979e-31	5.689313000051116e-27	WFIKKN1	-0.06704231381138401	ENSG00000127578.6	16	680932	684116	+	7058	1.05534	1005.1	204.38	-5717	16	675215	G	A	rs2269556	1	107	127	0.228417	1	1.0175699999999999e-27	0.618927	0.049674	9.999e-05	2.32835e-22	5.54812e-21	3.73219e-05	PIGQ	ENSG00000007541.10	16	620018	634109	PIGQ-002
Lung	15_75065644_G_C_b37	ENST00000561725.1	0.8419814998349929	11.8250311336483	2.6020377609811e-26	1.9957629626725036e-22	CSK	0.0227913098473419	ENSG00000103653.12	15	75074398	75095539	+	4573	1.0372	477.208	204.172	-8754	15	75065644	G	C	rs4886410	1	178	233	0.41906499999999997	-1	5.26825e-09	-0.220266	0.036331999999999996	9.999e-05	1.79287e-05	6.83193e-05	7.35361e-05	ULK3	ENSG00000140474.8	15	75128459	75135480	ULK3-004
Lung	11_780319_G_GTC_b37	ENST00000321153.4	-0.646792268431161	-8.767912975100941	2.01980164834632e-16	1.0327919095210849e-12	AP006621.5	-0.030550847804575	ENSG00000255284.1	11	777578	784297	+	7303	1.04661	933.0039999999999	205.048	2741	11	780319	G	GTC	rs200817511	1	188	246	0.442446	-1	4.182899999999999e-51	-0.7254619999999999	0.0371976	9.999e-05	1.43778e-43	1.59588e-41	3.8946500000000004e-05	RPLP2	ENSG00000177600.4	11	809647	812875	RPLP2-001
Lung	7_150021282_C_T_b37	ENST00000359623.4	0.491945592331146	5.23298397105642	3.3369578977891e-07	0.00127972335380212	ZBED6CL	0.0492721232770039	ENSG00000188707.4	7	150026938	150029808	+	7370	1.0556299999999998	856.403	204.795	-5656	7	150021282	C	T	rs1464751	1	116	134	0.24100700000000003	1	7.623880000000001e-16	-0.414893	0.0479191	9.999e-05	1.35239e-11	1.20129e-10	4.3847700000000004e-05	LRRC61	ENSG00000127399.10	7	150020376	150035239	LRRC61-001
Lung	20_6039392_C_A_b37	ENST00000378868.4	0.48322974341449604	4.82689667425228	2.31531105779691e-06	0.00598319762957946	LRRN4	0.0514515196710556	ENSG00000125872.7	20	6021424	6034695	-	7956	1.0180799999999999	1091.42	211.53599999999997	4697	20	6039392	C	A	rs6117052	1	106	120	0.215827	1	5.29681e-08	-0.297349	0.0528855	0.00029997	0.000242437	0.000742378	2.9904099999999997e-05	CRLS1	ENSG00000088766.7	20	5987898	6018039	CRLS1-005
Lung	7_150021282_C_T_b37	ENST00000463441.1	-0.4605533775108279	-4.82457982341982	2.3402337534209097e-06	0.00598319762957946	ZBED6CL	-0.0349360809217074	ENSG00000188707.4	7	150026938	150029808	+	7370	1.0556299999999998	856.403	204.795	-5656	7	150021282	C	T	rs1464751	1	116	134	0.24100700000000003	1	7.623880000000001e-16	-0.414893	0.0479191	9.999e-05	1.35239e-11	1.20129e-10	4.3847700000000004e-05	LRRC61	ENSG00000127399.10	7	150020305	150025875	LRRC61-004
Lung	10_72138154_T_C_b37	ENST00000304363.4	0.48085874183305205	4.36503583649428	1.8074100934256602e-05	0.039608101190213754	LRRC20	0.00924660845172243	ENSG00000172731.9	10	72058729	72142382	-	8581	1.0382799999999999	1145.08	207.33	-4228	10	72138154	T	C	rs12569450	1	87	97	0.17446	1	1.22558e-12	-0.355821	0.0473914	9.999e-05	1.63601e-08	1.00218e-07	3.07709e-05	SUV420H1	ENSG00000110066.10	11	67922330	67980882	SUV420H1-001
Lung	19_17705698_G_A_b37	ENST00000262384.3	0.437120171221843	4.25623613380609	2.86437678782965e-05	0.048821711028118706	JUND	0.0158085791575765	ENSG00000130522.4	19	18390563	18392432	-	6796	1.02874	1009.84	209.946	-686734	19	17705698	G	A	rs62119932	1	135	155	0.278777	1	1.99969e-05	0.21968200000000002	0.050464499999999995	0.050295	0.0514841	0.0761939	3.36637e-05	N4BP1	ENSG00000102921.3	16	48572637	48644120	N4BP1-001
Lung	8_145621556_A_G_b37	ENST00000532887.1	-0.35343670239629904	-4.28340334452534	2.55545846983344e-05	0.048821711028118706	CPSF1	-0.00394511858951378	ENSG00000071894.10	8	145618458	145634753	-	4137	1.01057	517.9159999999999	205.486	-13197	8	145621556	A	G	rs2280836	1	191	256	0.46043199999999995	1	1.9373599999999994e-82	-1.01423	0.0338297	9.999e-05	5.1286399999999997e-70	5.123339999999999e-67	6.120520000000001e-05	SLC52A2	ENSG00000185803.4	8	145582253	145584901	SLC52A2-004
Muscle-Skeletal	10_100176869_C_T_b37	ENST00000370575.4	0.7636979992972909	11.4038844622603	7.042920500327959e-26	7.044329084428025e-22	HPS1	-0.0362719202993235	ENSG00000107521.14	10	100175955	100206684	-	6193	1.0311	625.1030000000001	275.698	-29815	10	100176869	C	T	rs701801	1	200	255	0.353186	1	3.0729900000000003e-15	0.268787	0.0324009	9.999e-05	6.90086e-11	4.1561699999999993e-10	6.74686e-05	PYROXD2	ENSG00000119943.6	10	100143322	100174941	PYROXD2-001
Nerve-Tibial	16_677020_G_T_b37	ENST00000026218.5	0.921924094748001	11.456241650574698	1.05386911298118e-24	1.728977666756924e-20	WFIKKN1	-0.120155423850441	ENSG00000127578.6	16	680932	684116	+	7208	1.03926	1017.81	185.662	-3912	16	677020	G	T	rs34997977	1	105	124	0.24218800000000001	1	3.4066699999999994e-48	0.9981200000000001	0.052199	9.999e-05	1.55265e-40	8.35143e-39	5.6726000000000005e-05	PIGQ	ENSG00000007541.10	16	620018	634109	PIGQ-002
Nerve-Tibial	11_780319_G_GTC_b37	ENST00000530398.1	0.780274266795028	9.7391798206881	3.28750160493212e-19	2.6967375665258177e-15	AP006621.5	0.0618286876074815	ENSG00000255284.1	11	777578	784297	+	7416	1.05524	938.679	185.30599999999998	2741	11	780319	G	GTC	rs200817511	1	178	228	0.445312	-1	2.27569e-43	-0.866872	0.049344599999999995	9.999e-05	1.07405e-36	4.28416e-35	6.47727e-05	RPLP2	ENSG00000177600.4	11	810269	812871	RPLP2-009
Nerve-Tibial	11_780319_G_GTC_b37	ENST00000321153.4	-0.76785339772159	-9.65050711246705	6.18029608220006e-19	3.3797979174858062e-15	AP006621.5	-0.0234384173518225	ENSG00000255284.1	11	777578	784297	+	7416	1.05524	938.679	185.30599999999998	2741	11	780319	G	GTC	rs200817511	1	178	228	0.445312	-1	2.27569e-43	-0.866872	0.049344599999999995	9.999e-05	1.07405e-36	4.28416e-35	6.47727e-05	RPLP2	ENSG00000177600.4	11	809647	812875	RPLP2-001
Nerve-Tibial	13_53032735_T_G_b37	ENST00000378101.2	0.6900315395274038	8.78264200095873	2.58531673786584e-16	1.0603676600356742e-12	CKAP2	0.104138740085096	ENSG00000136108.10	13	53029564	53050763	+	5018	1.04139	418.045	181.733	3171	13	53032735	T	G	rs7328653	1	183	242	0.472656	1	5.81708e-48	-0.719593	0.0377821	9.999e-05	6.34493e-40	3.26444e-38	0.00013906700000000002	NEK3	ENSG00000136098.12	13	52706779	52733510	NEK3-202
Nerve-Tibial	19_41932084_G_T_b37	ENST00000592922.2	-0.7010383876866659	-8.34401130652704	4.90145162266016e-15	1.6082643064272517e-11	LIPE	0.0158113731451094	ENSG00000079435.5	19	42905659	42931578	-	6434	1.1013700000000002	358.642	172.078	-999494	19	41932084	G	T	rs284660	1	168	206	0.402344	-1	0.000316083	0.168364	0.0459835	0.321142	0.313204	0.19372999999999999	0.000195365	ATP5SL	ENSG00000105341.14	19	41937244	41945841	ATP5SL-001
Nerve-Tibial	1_155275727_C_T_b37	ENST00000302631.3	-0.644927116967442	-7.22628759474502	5.9996527772219196e-12	1.64050505771838e-08	HCN3	-0.0453753815542201	ENSG00000143630.5	1	155247502	155259629	+	4274	1.0641	454.07	182.03599999999997	28225	1	155275727	C	T	rs10908461	1	123	143	0.27929699999999996	1	1.69293e-33	-0.610169	0.04221130000000001	9.999e-05	1.02798e-27	2.1049900000000003e-26	0.00013770700000000001	SCAMP3	ENSG00000116521.6	1	155225770	155232050	SCAMP3-001
Nerve-Tibial	11_295876_C_T_b37	ENST00000440639.2	0.46652204828095295	4.80469237701812	2.67470382563951e-06	0.006268741566205972	ATHL1	-0.0426118386836906	ENSG00000142102.11	11	289138	296107	+	4856	1.0575700000000001	649.8530000000001	185.233	6738	11	295876	C	T	rs2242566	1	131	156	0.304688	1	4.88714e-24	0.57613	0.050249300000000004	9.999e-05	3.21353e-19	3.3718599999999993e-18	9.425569999999999e-05	HELQ	ENSG00000163312.6	4	84374910	84376976	HELQ-007
Nerve-Tibial	19_47549454_C_T_b37	ENST00000338343.4	0.552129681740948	4.634781642287151	5.75770790086132e-06	0.011807619477691352	TMEM160	-0.0259813868286837	ENSG00000130748.6	19	47549165	47551888	-	6500	1.04405	877.7389999999999	186.613	-2434	19	47549454	C	T	rs11083857	1	84	94	0.183594	1	4.5358900000000004e-08	0.437017	0.0770433	9.999e-05	0.000198022	0.00037612800000000004	6.68153e-05	FBXL19	ENSG00000099364.12	16	30935418	30960104	FBXL19-002
Nerve-Tibial	11_113833125_G_A_b37	ENST00000299882.5	-0.382632029527034	-4.53674944057335	8.87525597328076e-06	0.01617860549973824	DRD2	0.0231806873223309	ENSG00000149295.9	11	113280318	113346111	-	6158	1.0259200000000002	736.331	189.361	487014	11	113833125	G	A	rs1150230	1	162	219	0.427734	1	4.1282299999999995e-09	0.35946500000000003	0.058619500000000005	9.999e-05	1.77574e-05	4.00249e-05	7.50158e-05	TMPRSS5	ENSG00000166682.6	11	113558273	113577095	TMPRSS5-001
Nerve-Tibial	12_57838507_G_T_b37	ENST00000336873.5	-1.0920260798524102	-4.3424293880522296	2.0488978859976898e-05	0.0336142187176781	NAB2	-0.0072532997000820595	ENSG00000166886.8	12	57482677	57489190	+	4289	1.08397	403.12800000000004	179.225	355830	12	57838507	G	T	rs149109624	1	17	17	0.0332031	1	0.00100865	-0.28839499999999996	0.08649989999999999	0.627586	0.618488	0.295538	0.000164951	HPS4	ENSG00000100099.16	22	26848049	26879761	HPS4-006
Nerve-Tibial	19_47549454_C_T_b37	ENST00000309212.6	0.519446223680887	4.29998235095133	2.45045801710258e-05	0.03654746748053175	TMEM160	-0.0688968599830711	ENSG00000130748.6	19	47549165	47551888	-	6500	1.04405	877.7389999999999	186.613	-2434	19	47549454	C	T	rs11083857	1	84	94	0.183594	1	4.5358900000000004e-08	0.437017	0.0770433	9.999e-05	0.000198022	0.00037612800000000004	6.68153e-05	MXRA8	ENSG00000162576.12	1	1288071	1293915	MXRA8-001
Nerve-Tibial	19_47549454_C_T_b37	ENST00000396819.3	0.523953478682299	4.23882194612581	3.16371819315021e-05	0.04325330056401862	TMEM160	-0.0498384308642322	ENSG00000130748.6	19	47549165	47551888	-	6500	1.04405	877.7389999999999	186.613	-2434	19	47549454	C	T	rs11083857	1	84	94	0.183594	1	4.5358900000000004e-08	0.437017	0.0770433	9.999e-05	0.000198022	0.00037612800000000004	6.68153e-05	LTBP4	ENSG00000090006.13	19	41107277	41135725	LTBP4-204
Skin-NotSunExposed_Suprapubic_	16_678843_C_T_b37	ENST00000026218.5	0.862763602131034	9.05517630132473	1.6421116535173003e-16	5.560682692305634e-12	WFIKKN1	-0.0536084387092807	ENSG00000127578.6	16	680932	684116	+	6468	1.02775	937.56	139.668	-2089	16	678843	C	T	rs1984395	1	73	89	0.227041	1	5.6072699999999995e-30	0.957443	0.06760039999999999	9.999e-05	3.43263e-24	2.01005e-22	2.77501e-05	PIGQ	ENSG00000007541.10	16	620018	634109	PIGQ-002
Skin-NotSunExposed_Suprapubic_	11_780319_G_GTC_b37	ENST00000530398.1	0.732741804079488	8.09944385185055	6.51847462764113e-14	1.103675531579058e-09	AP006621.5	0.0754840904766038	ENSG00000255284.1	11	777578	784297	+	6989	1.03799	900.63	139.404	2741	11	780319	G	GTC	rs200817511	1	133	168	0.428571	-1	7.156249999999999e-17	-0.548551	0.058577300000000006	9.999e-05	1.86185e-12	2.85792e-11	3.00959e-05	RPLP2	ENSG00000177600.4	11	810269	812871	RPLP2-009
Skin-NotSunExposed_Suprapubic_	16_678843_C_T_b37	ENST00000321878.5	-0.7564766966528059	-7.57100826744077	1.56387732847859e-12	1.7652525991423497e-08	WFIKKN1	0.0639675372851076	ENSG00000127578.6	16	680932	684116	+	6468	1.02775	937.56	139.668	-2089	16	678843	C	T	rs1984395	1	73	89	0.227041	1	5.6072699999999995e-30	0.957443	0.06760039999999999	9.999e-05	3.43263e-24	2.01005e-22	2.77501e-05	PIGQ	ENSG00000007541.10	16	619947	634136	PIGQ-001
Skin-NotSunExposed_Suprapubic_	11_67204342_A_G_b37	ENST00000312629.5	-0.633970506479679	-7.2322664671462595	1.13262544638232e-11	9.588523872711126e-08	PTPRCAP	-0.0575354532986306	ENSG00000213402.2	11	67202981	67205518	-	4634	1.06675	379.398	131.61	-1176	11	67204342	A	G	rs12787021	1	140	195	0.497449	1	2.18762e-19	-0.627572	0.060914499999999996	9.999e-05	1.3185900000000002e-14	2.58173e-13	7.98447e-05	RPS6KB2	ENSG00000175634.10	11	67195972	67202872	RPS6KB2-003
Skin-NotSunExposed_Suprapubic_	11_47566352_T_C_b37	ENST00000302503.3	-0.5468206761646789	-5.1754719862104	5.754188064797379e-07	0.003897081408764673	C1QTNF4	-0.17190609041255306	ENSG00000172247.3	11	47611216	47616211	-	4650	1.0542799999999999	181.65900000000002	128.38	-49859	11	47566352	T	C	rs7928842	1	131	154	0.392857	1	2.40956e-17	-0.741197	0.07767310000000001	9.999e-05	1.1836799999999999e-12	1.85292e-11	0.000158993	MTCH2	ENSG00000109919.5	11	47638868	47664175	MTCH2-001
Skin-NotSunExposed_Suprapubic_	12_57993490_G_A_b37	ENST00000530649.1	-0.5686669302417371	-4.8924253171172	2.11766522855501e-06	0.011951749605759718	ARHGEF25	-0.0428468426315311	ENSG00000240771.2	12	58003963	58013162	+	4716	1.04844	384.885	136.02	-10473	12	57993490	G	A	rs812315	1	96	109	0.278061	-1	7.92557e-05	-0.18491400000000002	0.045636	0.0808919	0.08423589999999999	0.128052	7.3372e-05	TAGLN	ENSG00000149591.12	11	117072466	117075492	TAGLN-005
Skin-NotSunExposed_Suprapubic_	20_33880363_A_T_b37	ENST00000374450.3	0.43440758636877397	4.7962544232184	3.25842708866995e-06	0.01576287378623293	FAM83C	0.0636041507611971	ENSG00000125998.7	20	33873560	33880204	-	4055	1.01977	213.365	133.194	159	20	33880363	A	T	rs2425051	1	136	182	0.464286	1	1.49274e-13	-0.347974	0.043044	9.999e-05	1.98351e-09	2.05136e-08	0.00011803700000000001	EIF6	ENSG00000242372.2	20	33866714	33872788	EIF6-001
Skin-NotSunExposed_Suprapubic_	1_206651350_C_T_b37	ENST00000547759.1	-0.577363232787051	-4.72722771777409	4.4228462664817595e-06	0.01872135539023398	IKBKE	-0.0338566839793168	ENSG00000143466.9	1	206643791	206670223	+	3693	1.03692	430.91900000000004	138.613	7559	1	206651350	C	T	rs2297543	1	68	77	0.196429	1	1.95396e-33	-0.7887890000000001	0.0510974	9.999e-05	1.10242e-27	9.959839999999999e-26	6.26321e-05	FAR2	ENSG00000064763.6	12	29485621	29487005	FAR2-010
Skin-NotSunExposed_Suprapubic_	20_37257590_C_G_b37	ENST00000437291.2	-0.438858078628829	-4.513099762899469	1.1181388887461e-05	0.04207059687734353	ARHGAP40	-0.0199161360869592	ENSG00000124143.6	20	37230577	37279678	+	5232	1.03621	480.019	136.346	27013	20	37257590	C	G	rs6070809	1	99	121	0.308673	1	1.50432e-32	-0.774037	0.051231399999999996	9.999e-05	2.3363200000000003e-26	1.8469099999999998e-24	5.6067700000000005e-05	COX7A1	ENSG00000161281.6	19	36641824	36642927	COX7A1-003
Skin-NotSunExposed_Suprapubic_	22_37260474_A_G_b37	ENST00000367589.3	1.07263099913705	4.46374635515426	1.3785139239141699e-05	0.046680617005505534	H1F0	-0.0763773118523161	ENSG00000189060.4	22	38201114	38203442	+	5676	1.0328600000000001	697.21	139.141	-940640	22	37260474	A	G	rs909483	1	14	18	0.045918400000000005	1	0.000383928	0.571733	0.157573	0.447075	0.44915900000000003	0.328617	3.8090199999999997e-05	XPR1	ENSG00000143324.9	1	180601168	180855262	XPR1-002
Skin-SunExposed_Lowerleg_	16_677629_T_C_b37	ENST00000026218.5	0.8261160248836189	10.1335704177017	6.51090253647218e-21	9.390674728353826e-17	WFIKKN1	-0.0705493710409337	ENSG00000127578.6	16	680932	684116	+	7319	1.0339	1195.34	232.007	-3303	16	677629	T	C	rs2269557	1	127	146	0.241722	1	1.49006e-55	1.03716	0.051086599999999996	9.999e-05	3.0543099999999995e-48	3.148e-46	3.75673e-05	PIGQ	ENSG00000007541.10	16	620018	634109	PIGQ-002
Skin-SunExposed_Lowerleg_	11_780321_C_CTG_b37	ENST00000321153.4	-0.703580772639364	-9.67752422741313	2.00260145431301e-19	1.4441760387778271e-15	AP006621.5	-0.034501777555316	ENSG00000255284.1	11	777578	784297	+	7494	1.05772	954.785	225.354	2743	11	780321	C	CTG	rs10678686	1	216	278	0.460265	-1	1.75217e-20	-0.505463	0.0499925	9.999e-05	8.21982e-16	7.905289999999999e-15	5.10584e-05	RPLP2	ENSG00000177600.4	11	809647	812875	RPLP2-001
Skin-SunExposed_Lowerleg_	11_47674084_A_T_b37	ENST00000302503.3	-0.71521890391799	-7.8511123668303	7.623238211948339e-14	3.664998824364363e-10	C1QTNF4	-0.0709488565195648	ENSG00000172247.3	11	47611216	47616211	-	5187	1.02734	224.263	211.96099999999998	57873	11	47674084	A	T	rs11039327	1	177	201	0.332781	1	1.2939500000000001e-33	-0.751253	0.0536122	9.999e-05	4.9747100000000004e-26	1.02004e-24	0.000195618	MTCH2	ENSG00000109919.5	11	47638868	47664175	MTCH2-001
Skin-SunExposed_Lowerleg_	8_143808175_C_G_b37	ENST00000301258.4	-0.543039989303591	-7.3393512272053805	2.08089917541711e-12	7.503202201760245e-09	SLURP1	-0.0467974080109654	ENSG00000126233.1	8	143822362	143823829	-	8924	1.03767	1024.04	226.916	-15654	8	143808175	C	G	rs2585139	1	201	262	0.433775	1	1.08764e-21	-0.34939899999999996	0.033316399999999996	9.999e-05	1.05505e-16	1.10601e-15	4.4435e-05	PSCA	ENSG00000167653.4	8	143761874	143764142	PSCA-001
Skin-SunExposed_Lowerleg_	1_63908735_C_T_b37	ENST00000494765.1	0.441566602531166	4.72038384294922	3.63712808239628e-06	0.01049165966648031	ITGB3BP	0.0316153432061713	ENSG00000142856.12	1	63906441	63994857	-	6567	1.05505	637.476	222.104	-86122	1	63908735	C	T	rs3009576	1	157	179	0.296358	-1	8.012479999999999e-65	-0.9154690000000001	0.039696800000000004	9.999e-05	1.06776e-55	1.8287899999999998e-53	7.57825e-05	ALG6	ENSG00000088035.11	1	63893909	63902804	ALG6-004
Skin-SunExposed_Lowerleg_	3_49582677_T_C_b37	ENST00000467176.1	0.427285660594976	4.579044616689821	6.88717126110914e-06	0.01655561184982952	KLHDC8B	0.00798310002303788	ENSG00000185909.10	3	49209044	49213917	+	3106	1.03376	206.30599999999998	221.68599999999998	373633	3	49582677	T	C	rs4855837	1	155	177	0.29304600000000003	-1	4.5193599999999997e-14	-0.34674699999999997	0.0434195	9.999e-05	3.25291e-10	1.7547599999999998e-09	0.00021752400000000003	PFKFB4	ENSG00000114268.7	3	48587297	48599448	PFKFB4-015
Thyroid	12_58161898_G_C_b37	ENST00000350762.5	0.859494026239289	10.431671359983198	1.19098833812751e-21	1.4092965005062824e-17	CYP27B1	0.0421803171795417	ENSG00000111012.5	12	58156122	58161034	-	5167	1.03932	484.379	205.832	864	12	58161898	G	C	rs3782130	1	130	150	0.269784	1	3.2215e-39	-0.67913	0.0426857	9.999e-05	5.8932799999999996e-33	1.5612899999999998e-31	0.000121674	TSFM	ENSG00000123297.12	12	58176564	58190549	TSFM-201
Thyroid	16_677020_G_T_b37	ENST00000321878.5	-0.867952391109466	-10.084432794582199	1.59081098401103e-20	9.412033186901259e-17	WFIKKN1	0.120059781423651	ENSG00000127578.6	16	680932	684116	+	7251	1.05356	1048.93	205.47400000000002	-3912	16	677020	G	T	rs34997977	1	113	131	0.235612	1	1.8132e-54	1.0519399999999999	0.051203599999999995	9.999e-05	5.5639e-47	4.1607299999999996e-45	5.88293e-05	PIGQ	ENSG00000007541.10	16	619947	634136	PIGQ-001
Thyroid	11_780319_G_GTC_b37	ENST00000530398.1	0.647583603934151	8.55778432673082	8.56825893577843e-16	3.3796069329022052e-12	AP006621.5	0.0670391728951392	ENSG00000255284.1	11	777578	784297	+	7346	1.04421	980.575	205.67	2741	11	780319	G	GTC	rs200817511	1	192	248	0.446043	-1	2.20996e-53	-0.604741	0.0299282	9.999e-05	1.17476e-45	8.043360000000001e-44	6.10693e-05	RPLP2	ENSG00000177600.4	11	810269	812871	RPLP2-009
Thyroid	13_53029485_C_G_b37	ENST00000378101.2	0.60757717367636	8.266352083171709	6.15587279266611e-15	1.821061068890452e-11	CKAP2	0.10183307608169198	ENSG00000136108.10	13	53029564	53050763	+	5001	1.06208	415.12	198.918	-79	13	53029485	C	G	rs3892337	1	191	258	0.46402899999999997	1	1.0685699999999999e-45	-0.7168939999999999	0.0401505	9.999e-05	2.26625e-38	9.297879999999998e-37	0.000152697	NEK3	ENSG00000136098.12	13	52706779	52733510	NEK3-202
Thyroid	17_44026739_G_A_b37	ENST00000576870.1	0.5904901973517691	7.386656229608881	1.84985091470132e-12	4.377857174732144e-09	MAPT	-0.0289186430430927	ENSG00000186868.11	17	43971748	44105700	+	6772	1.05285	377.916	197.56900000000002	54991	17	44026739	G	A	rs242562	1	159	200	0.359712	1	1.81918e-18	0.536297	0.0561894	9.999e-05	8.580319999999999e-14	5.057109999999999e-13	0.0001629	KANSL1	ENSG00000120071.8	17	44107284	44117431	KANSL1-005
Thyroid	12_6990548_A_G_b37	ENST00000542751.1	-0.594084299062057	-7.12187230380524	9.523792130097711e-12	1.8782505379241037e-08	SPSB2	0.0179247672790617	ENSG00000111671.5	12	6980113	6998522	-	6881	1.05131	955.4810000000001	208.15900000000002	-7974	12	6990548	A	G	rs10849531	1	146	185	0.33273400000000003	1	5.96954e-43	0.725025	0.0425793	9.999e-05	7.1487e-37	2.5813899999999995e-35	6.41206e-05	GNB3	ENSG00000111664.6	12	6954531	6956516	GNB3-010
Thyroid	12_7021615_A_G_b37	ENST00000542751.1	-0.5148504008589521	-6.22784390572339	1.7876023783937196e-09	3.0218141347904124e-06	LRRC23	0.00507345771652345	ENSG00000010626.10	12	7013897	7023407	+	6875	1.0393700000000001	985.951	209.40400000000002	7718	12	7021615	A	G	rs2238116	1	135	167	0.30036	1	3.1424999999999996e-29	0.566513	0.0438544	9.999e-05	5.20262e-24	7.10582e-23	5.9789e-05	GNB3	ENSG00000111664.6	12	6954531	6956516	GNB3-010
Thyroid	1_53771564_C_T_b37	ENST00000371470.3	0.46849339495652004	5.4121858508296	1.3672074478693302e-07	0.00020222707163297229	LRP8	0.142797656326327	ENSG00000157193.10	1	53711217	53793742	-	6117	1.0388700000000002	670.7239999999999	206.938	-22178	1	53771564	C	T	rs1288492	1	206	277	0.498201	1	4.1586099999999996e-47	-0.6877800000000001	0.0376204	9.999e-05	3.61914e-40	1.71894e-38	8.77433e-05	MAGOH	ENSG00000162385.6	1	53692564	53704282	MAGOH-001
Thyroid	1_63901428_T_A_b37	ENST00000494765.1	0.47445033219641103	4.963771986698469	1.22140851623834e-06	0.0016058807747386975	ITGB3BP	0.0399534326493528	ENSG00000142856.12	1	63906441	63994857	-	6424	1.05241	634.247	203.61900000000003	-93429	1	63901428	T	A	rs3004316	1	144	166	0.298561	-1	1.3406999999999998e-101	-1.24089	0.033014	9.999e-05	1.57938e-89	2.3790199999999997e-86	9.693350000000001e-05	ALG6	ENSG00000088035.11	1	63893909	63902804	ALG6-004
Thyroid	6_31650592_AG_A_b37	ENST00000497645.1	0.45549843199738205	4.833713061901519	2.24346323034077e-06	0.0026546900404622333	LY6G5C	0.0297659617419295	ENSG00000204428.8	6	31644461	31651817	-	29744	1.1061	493.01199999999994	174.68400000000003	-1225	6	31650592	AG	A	rs9279386	1	154	186	0.334532	1	1.68098e-23	-0.724979	0.0649637	9.999e-05	1.19832e-16	9.16923e-16	0.000146937	VWA7	ENSG00000204396.6	6	31743836	31744696	VWA7-003
Thyroid	5_176936819_C_G_b37	ENST00000361580.2	-0.6811995413945741	-4.62854437860608	5.70727076829084e-06	0.006139466818289592	DOK3	0.0179022181526719	ENSG00000146094.9	5	176928908	176938275	-	6373	1.05241	813.033	201.96	-1456	5	176936819	C	G	rs3749728	1	45	47	0.0845324	1	1.2536500000000001e-09	0.454758	0.071892	9.999e-05	8.63885e-06	2.01079e-05	7.56193e-05	KIFAP3	ENSG00000075945.8	1	169890467	170043836	KIFAP3-001
Thyroid	16_677020_G_T_b37	ENST00000251588.2	-0.42214725394229596	-4.508609181369691	9.70798962910339e-06	0.009572886773431702	WFIKKN1	0.0571601610076814	ENSG00000127578.6	16	680932	684116	+	7251	1.05356	1048.93	205.47400000000002	-3912	16	677020	G	T	rs34997977	1	113	131	0.235612	1	1.8132e-54	1.0519399999999999	0.051203599999999995	9.999e-05	5.5639e-47	4.1607299999999996e-45	5.88293e-05	NARFL	ENSG00000103245.9	16	779753	791002	NARFL-001
Thyroid	19_3536816_T_C_b37	ENST00000441788.2	-0.38414267839220895	-4.466032246027161	1.1692019134206e-05	0.0106424355703892	C19orf71	-0.0800662534183107	ENSG00000183397.5	19	3539152	3544028	+	8728	1.05116	1510.33	209.047	-2336	19	3536816	T	C	rs8100223	1	199	264	0.47481999999999996	-1	1.5550099999999999e-30	-0.5405909999999999	0.040609	9.999e-05	2.96495e-25	4.45973e-24	4.05461e-05	FZR1	ENSG00000105325.9	19	3506271	3538328	FZR1-001
Thyroid	2_242027525_A_G_b37	ENST00000472072.1	-0.434760583988827	-4.271731732817	2.6840575772684e-05	0.020711661476038798	MTERFD2	-0.0042279822782069106	ENSG00000122085.12	2	242011584	242041747	-	8675	1.0429	1016.16	204.46	-14222	2	242027525	A	G	rs1804998	1	105	132	0.23740999999999998	1	4.07897e-27	-0.673407	0.0548559	9.999e-05	1.4634999999999999e-21	1.63467e-20	5.8681300000000003e-05	PASK	ENSG00000115687.9	2	242045710	242049195	PASK-006
Thyroid	16_30787697_TGTG_T_b37	ENST00000304430.5	0.382762901167849	4.2767302649399	2.62824324535212e-05	0.020711661476038798	C16orf93	0.0191530629005002	ENSG00000196118.7	16	30772519	30774031	-	3353	1.04894	309.865	198.998	13666	16	30787697	TGTG	T	rs367954595	1	161	207	0.372302	1	2.51878e-27	-0.546955	0.0443244	9.999e-05	8.660200000000001e-22	9.85048e-21	0.000196199	NUDT6	ENSG00000170917.9	4	123813799	123843761	NUDT6-001
Thyroid	20_61025147_C_T_b37	ENST00000253108.4	-1.22138863713874	-4.2616134051083305	2.80052889053174e-05	0.020711661476038798	RPS21	-0.123859137931922	ENSG00000171858.13	20	60962172	60963576	+	8955	1.04168	1286.23	207.583	62975	20	61025147	C	T	rs6061539	1	16	17	0.0305755	1	0.000632372	-0.478465	0.138133	0.823868	0.813375	0.33606199999999997	4.6177299999999996e-05	EIF3G	ENSG00000130811.6	19	10225693	10230578	EIF3G-001
Thyroid	5_155603691_T_A_b37	ENST00000449836.1	-0.39881254311145903	-4.06692436015082	6.244067055848579e-05	0.0434623796893272	SGCD	-0.007650512533956359	ENSG00000170624.9	5	155297354	156194799	+	6551	1.04713	468.163	198.676	306337	5	155603691	T	A	rs2311453	1	126	144	0.258993	1	1.8527299999999998e-29	-0.637004	0.0490478	9.999e-05	2.0703600000000004e-23	2.70174e-22	0.000129114	ZNF502	ENSG00000196653.7	3	44754135	44765321	ZNF502-201
Thyroid	11_812188_G_A_b37	ENST00000530071.1	0.34383091110492103	4.0250040337013395	7.391984951982141e-05	0.04859408774266927	PIDD	-0.00911002827030386	ENSG00000177595.13	11	799179	809646	-	7441	1.04536	972.959	205.313	2542	11	812188	G	A	rs4131364	1	191	254	0.45683500000000005	1	5.07628e-15	0.26516799999999996	0.0316773	9.999e-05	1.0324799999999999e-10	4.4146699999999995e-10	6.17765e-05	RAB2A	ENSG00000104388.10	8	61496603	61533500	RAB2A-012
WholeBlood	11_780321_C_CTG_b37	ENST00000321153.4	-0.687570116853715	-10.467331649160698	2.4427900976272596e-22	4.053565888002674e-18	AP006621.5	-0.0151158620761667	ENSG00000255284.1	11	777578	784297	+	7714	1.05161	1074.69	259.809	2743	11	780321	C	CTG	rs10678686	1	235	309	0.45710100000000004	-1	7.44516e-27	-0.526421	0.0443362	9.999e-05	8.9057e-22	1.4142399999999998e-20	3.88266e-05	RPLP2	ENSG00000177600.4	11	809647	812875	RPLP2-001
WholeBlood	8_22457205_T_G_b37	ENST00000520489.1	0.63351281932946	9.01178446882785	1.65313450888576e-17	1.371605702022515e-13	C8orf58	-0.105417035689935	ENSG00000241852.5	8	22457114	22461663	+	7358	1.0645799999999999	1064.85	257.569	91	8	22457205	T	G	rs755934	1	173	217	0.321006	1	3.00682e-07	0.202684	0.038655800000000004	0.00089991	0.00121872	0.00275616	4.100310000000001e-05	BIN3	ENSG00000147439.7	8	22477949	22484055	BIN3-005
WholeBlood	11_117061961_T_C_b37	ENST00000532870.1	0.762648141013882	8.44366438178801	9.792499539806252e-16	5.4165579121181646e-12	SIDT2	-0.0960323708720294	ENSG00000149577.11	11	117049449	117068160	+	8443	1.05965	1137.43	259.275	12512	11	117061961	T	C	rs499713	1	122	132	0.195266	-1	5.349859999999999e-29	0.6412909999999999	0.05139439999999999	9.999e-05	7.420099999999999e-24	1.3931299999999999e-22	3.77352e-05	TAGLN	ENSG00000149591.12	11	117072589	117075494	TAGLN-003
WholeBlood	12_8210637_A_G_b37	ENST00000229332.5	-0.37923082746964293	-4.9072614603775	1.45191802067014e-06	0.006023281908750075	FOXJ2	0.0262098972871512	ENSG00000065970.4	12	8185299	8208099	+	8174	1.05025	1004.61	258.23400000000004	25338	12	8210637	A	G	rs2072449	1	189	233	0.344675	-1	3.13562e-25	0.39447600000000005	0.034578	9.999e-05	3.78229e-20	5.2106e-19	4.1335500000000004e-05	CLEC4A	ENSG00000111729.8	12	8276228	8291203	CLEC4A-001
